# Supplementary material for: m6A reader Pho92 is recruited co-transcriptionally and couples translation efficacy to mRNA decay to promote meiotic fitness in yeast
Source: bioRxiv preprint, doi:10.1101/2022.01.20.477035, version 2 (2022-04-04)
Supplement: Table S4 [file 477035_file06.xlsx]

## Sheet: PM
Protein IDs	Majority protein IDs	Peptide counts (all)	Peptide counts (razor+unique)	Peptide counts (unique)	Protein names	Gene names	Fasta headers	Number of proteins	Peptides	Razor + unique peptides	Unique peptides	Peptides forward	Peptides reverse	Razor + unique peptides forward	Razor + unique peptides reverse	Unique peptides forward	Unique peptides reverse	Sequence coverage [%]	Unique + razor sequence coverage [%]	Unique sequence coverage [%]	Mol. weight [kDa]	Sequence length	Sequence lengths	Q-value	Ratio H/L	Ratio H/L normalized	Ratio H/L variability [%]	Ratio H/L count	Ratio H/L iso-count	Ratio H/L type	Ratio H/L forward	Ratio H/L normalized forward	Ratio H/L variability [%] forward	Ratio H/L count forward	Ratio H/L iso-count forward	Ratio H/L type forward	Ratio H/L reverse	Ratio H/L normalized reverse	Ratio H/L variability [%] reverse	Ratio H/L count reverse	Ratio H/L iso-count reverse	Ratio H/L type reverse	Sequence coverage forward [%]	Sequence coverage reverse [%]	Intensity	Intensity L	Intensity H	Intensity forward	Intensity L forward
A5Z2X5	A5Z2X5	5	5	5	UPF0495 protein YPR010C-A	YPR010C-A	>sp|A5Z2X5|YP010_YEAST UPF0495 protein YPR010C-A OS=Saccharomyces cerevisiae (strain ATCC 204508 / S288c) GN=YPR010C-A PE=3 SV=1	1	5	5	5	5	4	5	4	5	4	38.9	38.9	38.9	7.9021	72	72	0	1.0498	1.0354	35.431	10	0	Median	1.2378	1.4366	12.996	5	0	Median	0.85532	0.73667	19.483	5	0	Median	38.9	37.5	3960100000	2006100000	1954100000	2026200000	985390000
CON__A2A5Y0;CON__Q9UE12;CON__Q15323;CON__O76015;CON__O76014;CON__Q6IFU5	CON__A2A5Y0;CON__Q9UE12;CON__Q15323	10;8;8;3;3;2	10;8;8;3;3;2	1;0;0;0;0;0			>A2A5Y0 TREMBL:A2A5Y0 Tax_Id=10090 Gene_Symbol=Krt31 keratin complex 1, acidic, gene 1;>Q9UE12 TREMBL:Q9UE12 Type I hair keratin 1 - Homo sapiens (Human).;>Q15323 SWISS-PROT:Q15323 Keratin, type I cuticular HA1 (Hair keratin, type I HA1)	6	10	10	1	0	10	0	10	0	1	18	18	2.4	47.117	416	416;416;416;456;471;431	0	0.078276	0.067504	114.23	9	7	Median	NaN	NaN	NaN	0	0	Median	0.078276	0.067504	114.23	9	7	Median	0	18	3316200000	3217500000	98725000	0	0
CON__O43790;CON__Q14533;CON__Q3KNV1;CON__P08729;CON__Q9NSB2;CON__Q6ISB0	CON__O43790;CON__Q14533	13;12;1;1;1;1	13;12;1;1;1;1	0;0;0;0;0;0			>O43790 SWISS-PROT:O43790 Keratin, type II cuticular Hb6 (Hair keratin, type II Hb6) (ghHb6) - Homo sapiens (Human).;>Q14533 SWISS-PROT:Q14533 Keratin, type II cuticular Hb1 (Hair keratin, type II Hb1) (ghHKb1) (ghHb1) (MLN 137) - Homo sapiens (Human).	6	13	13	0	0	13	0	13	0	0	23.7	23.7	0	53.5	486	486;505;469;469;600;600	0	0.038621	0.031848	235.18	13	13	Median	NaN	NaN	NaN	0	0	Median	0.038621	0.031848	235.18	13	13	Median	0	23.7	2795900000	2618900000	176960000	0	0
CON__O76013;CON__Q14532	CON__O76013	9;3	5;1	4;0			>O76013 SWISS-PROT:O76013 Keratin, type I cuticular HA6 (Hair keratin, type I HA6)	2	9	5	4	0	9	0	5	0	4	15.4	7.5	4.9	52.247	467	467;448	0	0.027069	0.023469	115.81	6	6	Median	NaN	NaN	NaN	0	0	Median	0.027069	0.023469	115.81	6	6	Median	0	15.4	788380000	768890000	19490000	0	0
CON__P00761	CON__P00761	6	6	6			>P00761 SWISS-PROT:P00761|TRYP_PIG Trypsin - Sus scrofa (Pig).	1	6	6	6	6	6	6	6	6	6	39.4	39.4	39.4	24.409	231	231	0	0.891	0.90783	52.984	12	0	Median	0.97778	1.1036	42.238	6	0	Median	0.7328	0.5556	52.638	6	0	Median	39.4	39.4	23654000000	13041000000	10613000000	10238000000	5317700000
CON__P02662	CON__P02662	2	2	2			>P02662 SWISS-PROT:P02662 Alpha-S1-casein - Bos taurus (Bovine).	1	2	2	2	2	0	2	0	2	0	11.1	11.1	11.1	22.975	199	199	0	1.1522	1.3134	18.24	2	1	Median	1.1522	1.3134	18.24	2	1	Median	NaN	NaN	NaN	0	0	Median	11.1	0	103550000	54229000	49326000	103550000	54229000
CON__P02666	CON__P02666	2	2	2			>P02666 SWISS-PROT:P02666 Beta-casein - Bos taurus (Bovine).	1	2	2	2	2	1	2	1	2	1	6.7	6.7	6.7	23.583	209	209	0.0074196	0.96278	1.0759	32.354	3	0	Median	0.97991	1.0975	2.8122	2	0	Median	NaN	NaN	NaN	1	0	Median	6.7	3.3	164710000	84653000	80056000	87649000	42784000
CON__P04264	CON__P04264	8	7	7			>P04264 SWISS-PROT:P04264 Tax_Id=9606 Gene_Symbol=KRT1 Keratin, type II cytoskeletal 1	1	8	7	7	7	4	6	3	6	3	17.4	15.5	15.5	66.017	644	644	0	0.38856	0.32533	96.326	5	0	Median	2.6949	3.0663	74.577	3	1	Plateau	0.31841	0.26838	14.731	3	0	Median	17.4	7.6	1868200000	1052900000	815320000	629800000	141040000
CON__P13645;CON__P08730-1;CON__P02535-1;CON__P08727;CON__P19001;CON__ENSEMBL:ENSP00000377550;CON__Q04695;CON__Q9QWL7;CON__A2A4G1;CON__P02533;CON__P08779;CON__P05784;CON__Q6IFX2;CON__A2AB72;CON__P13646-1;CON__Q148H6;CON__Q9Z2K1;CON__Q3ZAW8;CON__Q7Z3Y7;CON__Q99456;CON__Q2M2I5	CON__P13645	8;3;3;2;2;2;2;2;2;2;2;1;1;1;1;1;1;1;1;1;1	7;2;2;1;1;1;1;1;1;1;1;0;0;0;1;0;0;0;0;1;0	6;1;2;0;0;1;0;0;0;0;0;0;0;0;1;0;0;0;0;0;0			>P13645 SWISS-PROT:P13645 Tax_Id=9606 Gene_Symbol=KRT10 Keratin, type I cytoskeletal 10	21	8	7	6	3	6	3	5	3	4	23.3	22.1	20.6	59.51	593	593;437;570;400;403;420;432;433;456;472;473;423;452;453;458;464;469;474;486;494;525	0	0.50698	0.4422	109.84	4	0	Median	0.47888	0.55758	130.09	3	1	Median	0.38799	0.35592	88.445	6	4	Median	10.6	16.7	338960000	214920000	124050000	170960000	104450000
CON__P13647;CON__Q5XQN5	CON__P13647;CON__Q5XQN5	3;2	3;2	3;2			>P13647 SWISS-PROT:P13647 Tax_Id=9606 Gene_Symbol=KRT5 Keratin, type II cytoskeletal 5;>Q5XQN5 SWISS-PROT:Q5XQN5 (Bos taurus) Keratin, type II cytoskeletal 5	2	3	3	3	2	2	2	2	2	2	6.6	6.6	6.6	62.378	590	590;601	0	1.3399	1.3845	151.44	4	2	Median	4.4961	5.2382	55.49	2	2	Median	0.49269	0.4149	37.725	2	0	Median	4.1	4.2	198370000	97865000	100500000	88955000	15930000
CON__P35527	CON__P35527	5	5	5			>P35527 SWISS-PROT:P35527 Tax_Id=9606 Gene_Symbol=KRT9 Keratin, type I cytoskeletal 9	1	5	5	5	5	1	5	1	5	1	14	14	14	62.129	623	623	0	3.6886	4.0036	92.956	3	0	Median	14.801	17.189	85.567	6	4	Median	NaN	NaN	NaN	1	0	Median	14	2.1	421510000	68605000	352900000	385090000	48669000
CON__P35908;CON__Q9R0H5;CON__Q6NXH9;CON__Q6IFZ6;CON__Q7Z794;CON__ENSEMBL:ENSBTAP00000038253;CON__Q3TTY5	CON__P35908	9;1;1;1;1;1;1	9;1;1;1;1;1;1	8;0;0;0;0;0;1			>P35908 SWISS-PROT:P35908 Tax_Id=9606 Gene_Symbol=KRT2 Keratin, type II cytoskeletal 2 epidermal	7	9	9	8	8	6	8	6	7	5	19.1	19.1	17.2	65.865	645	645;524;539;572;578;606;707	0	2.3082	2.6721	154.15	8	0	Median	3.6638	4.2384	65.242	5	0	Median	0.30253	0.24272	67.139	3	0	Median	18.9	9.6	1361900000	771290000	590660000	515330000	99141000
CON__P78386	CON__P78386	11	2	1			>P78386 SWISS-PROT:P78386 Keratin, type II cuticular Hb5 (Hair keratin, type II Hb5) - Homo sapiens (Human).	1	11	2	1	0	11	0	2	0	1	17.9	3.4	1.6	55.802	507	507	0.0017346	0.020925	0.017917	156.36	2	2	Median	NaN	NaN	NaN	0	0	Median	0.020925	0.017917	156.36	2	2	Median	0	17.9	636640000	632400000	4242300	0	0
CON__Q14525	CON__Q14525	8	1	1			>Q14525 SWISS-PROT:Q14525 Keratin, type I cuticular HA3-II (Hair keratin, type I HA3-II)	1	8	1	1	0	8	0	1	0	1	13.9	3	3	46.213	404	404	0	0.13209	0.11253	263.53	2	2	Median	NaN	NaN	NaN	0	0	Median	0.13209	0.11253	263.53	2	2	Median	0	13.9	447430000	366780000	80648000	0	0
CON__Q497I4	CON__Q497I4	7	1	0			>Q497I4 TREMBL:Q497I4 Tax_Id=10090 Gene_Symbol=Krt35 Krt35 protein	1	7	1	0	0	7	0	1	0	0	10.8	2.2	0	50.529	455	455	0	NaN	NaN	NaN	1	1	Median	NaN	NaN	NaN	0	0	Median	NaN	NaN	NaN	1	1	Median	0	10.8	1557600000	176820000	1380800000	0	0
CON__Q61726	CON__Q61726	11	3	2			>Q61726 TREMBL:Q61726 Tax_Id=10090 Gene_Symbol=5430421N21Rik Keratin type II	1	11	3	2	0	11	0	3	0	2	21.3	7.1	5.2	52.809	479	479	0	0.19942	0.18017	152.76	3	3	Median	NaN	NaN	NaN	0	0	Median	0.19942	0.18017	152.76	3	3	Median	0	21.3	131440000	117420000	14015000	0	0
CON__Q86YZ3	CON__Q86YZ3	5	5	5			>Q86YZ3 SWISS-PROT:Q86YZ3 Tax_Id=9606 Gene_Symbol=HRNR Hornerin	1	5	5	5	5	0	5	0	5	0	5.1	5.1	5.1	282.39	2850	2850	0	12.486	14.189	14.003	3	0	Median	12.486	14.189	14.003	3	0	Median	NaN	NaN	NaN	0	0	Median	5.1	0	203400000	10268000	193140000	203400000	10268000
CON__Q9BYR9	CON__Q9BYR9	1	1	1			>Q9BYR9 SWISS-PROT:Q9BYR9 Tax_Id=9606 Gene_Symbol=KRTAP2-4;LOC644350;LOC728934;KAP2.1B;LOC730755;LOC728285 Keratin-associated protein 2-4	1	1	1	1	0	1	0	1	0	1	7.8	7.8	7.8	13.48	128	128	0.0042265	NaN	NaN	NaN	1	1	Median	NaN	NaN	NaN	0	0	Median	NaN	NaN	NaN	1	1	Median	0	7.8	35507000	34721000	785780	0	0
CON__Q9D646;CON__O76011;CON__Q6NTB9;CON__O76009;CON__Q8IUT8	CON__Q9D646;CON__O76011;CON__Q6NTB9;CON__O76009;CON__Q8IUT8	7;6;6;6;6	1;1;1;1;1	1;1;1;1;1			>Q9D646 TREMBL:Q9D646 Tax_Id=10090 Gene_Symbol=Krt34 10 days neonate skin cDNA, RIKEN full-length enriched library, clone:4733401E01 product:keratin complex 1, acidic, gene 4, full insert sequence;>O76011 SWISS-PROT:O76011 Keratin, type I cuticular HA4 (Ha	5	7	1	1	0	7	0	1	0	1	13.5	1.8	1.8	44.56	392	392;394;404;404;436	1	NaN	NaN	NaN	1	1	Median	NaN	NaN	NaN	0	0	Median	NaN	NaN	NaN	1	1	Median	0	13.5	248230000	245720000	2506800	0	0
CON__Q9NSB4	CON__Q9NSB4	1	1	1			>Q9NSB4 SWISS-PROT:Q9NSB4 Keratin, type II cuticular Hb2 (Hair keratin, type II Hb2) - Homo sapiens (Human).	1	1	1	1	0	1	0	1	0	1	2.3	2.3	2.3	56.682	513	513	0	NaN	NaN	NaN	1	1	Median	NaN	NaN	NaN	0	0	Median	NaN	NaN	NaN	1	1	Median	0	2.3	45802000	44949000	852670	0	0
CON__REFSEQ:XP_986630	CON__REFSEQ:XP_986630	10	1	1			>REFSEQ:XP_986630 Tax_Id=10090 Gene_Symbol=Krt33b keratin complex 1, acidic, gene 3	1	10	1	1	0	10	0	1	0	1	16.2	2.5	2.5	53.728	476	476	0	NaN	NaN	NaN	1	1	Median	NaN	NaN	NaN	0	0	Median	NaN	NaN	NaN	1	1	Median	0	16.2	494110000	482170000	11944000	0	0
CON__Streptavidin	CON__Streptavidin	9	9	9			>Streptavidin (S.avidinii)	1	9	9	9	9	9	9	9	9	9	49.4	49.4	49.4	16.622	160	160	0	1.0337	1.0776	50.698	52	0	Median	1.0899	1.2582	34.824	26	0	Median	0.91199	0.70772	42.442	26	0	Median	49.4	49.4	341170000000	149870000000	191300000000	170250000000	68357000000
O13516	O13516	17	2	2	40S ribosomal protein S9-A	RPS9A	>sp|O13516|RS9A_YEAST 40S ribosomal protein S9-A OS=Saccharomyces cerevisiae (strain ATCC 204508 / S288c) GN=RPS9A PE=1 SV=3	1	17	2	2	17	16	2	1	2	1	68.5	12.7	12.7	22.443	197	197	0	0.77073	0.89583	13.615	5	0	Median	0.7445	0.88487	6.3346	3	0	Median	1.3352	1.0855	0.89375	2	0	Median	68.5	65	1621500000	825910000	795560000	823710000	473190000
O14455	O14455	16	16	4	60S ribosomal protein L36-B	RPL36B	>sp|O14455|RL36B_YEAST 60S ribosomal protein L36-B OS=Saccharomyces cerevisiae (strain ATCC 204508 / S288c) GN=RPL36B PE=1 SV=3	1	16	16	4	16	15	16	15	4	4	81	81	24	11.135	100	100	0	1.0314	0.98997	43.697	47	0	Median	0.83338	0.99179	42.078	23	0	Median	1.1685	0.98197	44.968	24	0	Median	81	76	56148000000	25697000000	30451000000	27564000000	14098000000
O14464	O14464	2	2	2	54S ribosomal protein RTC6, mitochondrial	RTC6	>sp|O14464|RTC6_YEAST 54S ribosomal protein RTC6, mitochondrial OS=Saccharomyces cerevisiae (strain ATCC 204508 / S288c) GN=RTC6 PE=1 SV=1	1	2	2	2	2	2	2	2	2	2	10.8	10.8	10.8	10.698	93	93	0.00088417	1.1214	1.1184	23.909	4	0	Median	1.0824	1.1984	21.918	2	0	Median	1.1968	0.98959	29.464	2	0	Median	10.8	10.8	524260000	244080000	280180000	249380000	129510000
O74700	O74700	1	1	1	Mitochondrial import inner membrane translocase subunit TIM9	TIM9	>sp|O74700|TIM9_YEAST Mitochondrial import inner membrane translocase subunit TIM9 OS=Saccharomyces cerevisiae (strain ATCC 204508 / S288c) GN=TIM9 PE=1 SV=1	1	1	1	1	1	1	1	1	1	1	16.1	16.1	16.1	10.202	87	87	0	0.97229	0.92385	2.7996	2	0	Median	NaN	NaN	NaN	1	0	Median	NaN	NaN	NaN	1	0	Median	16.1	16.1	150730000	76385000	74348000	66523000	37908000
P00044	P00044	1	1	1	Cytochrome c iso-1	CYC1	>sp|P00044|CYC1_YEAST Cytochrome c iso-1 OS=Saccharomyces cerevisiae (strain ATCC 204508 / S288c) GN=CYC1 PE=1 SV=2	1	1	1	1	1	1	1	1	1	1	7.3	7.3	7.3	12.182	109	109	0.0074689	1.2783	1.4281	74.485	5	3	Median	1.2899	1.4666	3.7639	2	0	Median	0.47126	0.37931	78.154	3	3	Median	7.3	7.3	460170000	202550000	257620000	232010000	84055000
P00127	P00127	1	1	1	Cytochrome b-c1 complex subunit 6	QCR6	>sp|P00127|QCR6_YEAST Cytochrome b-c1 complex subunit 6 OS=Saccharomyces cerevisiae (strain ATCC 204508 / S288c) GN=QCR6 PE=1 SV=2	1	1	1	1	1	1	1	1	1	1	8.2	8.2	8.2	17.257	147	147	0	1.0544	1.0865	108.4	2	0	Median	NaN	NaN	NaN	1	0	Median	NaN	NaN	NaN	1	0	Median	8.2	8.2	129050000	54951000	74097000	73483000	22335000
P00128	P00128	11	11	11	Cytochrome b-c1 complex subunit 7	QCR7	>sp|P00128|QCR7_YEAST Cytochrome b-c1 complex subunit 7 OS=Saccharomyces cerevisiae (strain ATCC 204508 / S288c) GN=QCR7 PE=1 SV=2	1	11	11	11	10	10	10	10	10	10	83.5	83.5	83.5	14.565	127	127	0	1.1315	1.0612	37.709	23	0	Median	1.318	1.4427	30.442	11	0	Median	1.014	0.85402	35.262	12	0	Median	83.5	73.2	7410000000	3603900000	3806200000	3848700000	1741600000
P00175	P00175	8	8	8	Cytochrome b2, mitochondrial	CYB2	>sp|P00175|CYB2_YEAST Cytochrome b2, mitochondrial OS=Saccharomyces cerevisiae (strain ATCC 204508 / S288c) GN=CYB2 PE=1 SV=1	1	8	8	8	5	7	5	7	5	7	16.8	16.8	16.8	65.539	591	591	0	0.89475	0.94859	37.942	13	0	Median	0.87468	0.9748	41.73	5	0	Median	0.90954	0.80954	33.907	8	0	Median	11.7	13.9	847500000	434680000	412810000	390280000	199510000
P00330;P38113	P00330	27;2	27;2	17;0	Alcohol dehydrogenase 1	ADH1	>sp|P00330|ADH1_YEAST Alcohol dehydrogenase 1 OS=Saccharomyces cerevisiae (strain ATCC 204508 / S288c) GN=ADH1 PE=1 SV=5	2	27	27	17	26	25	26	25	16	16	57.8	57.8	44.5	36.849	348	348;351	0	0.95828	0.97324	31.556	65	0	Median	0.90009	1.0328	28.492	32	0	Median	1.1501	0.95265	31.911	33	0	Median	57.8	48.9	111710000000	51176000000	60534000000	53592000000	26183000000
P00331	P00331	20	10	10	Alcohol dehydrogenase 2	ADH2	>sp|P00331|ADH2_YEAST Alcohol dehydrogenase 2 OS=Saccharomyces cerevisiae (strain ATCC 204508 / S288c) GN=ADH2 PE=1 SV=3	1	20	10	10	19	18	9	9	9	9	41.7	24.1	24.1	36.731	348	348	0	0.88982	0.88646	27.098	23	0	Median	0.77939	0.90227	24.7	12	0	Median	1.0397	0.87702	29.341	11	0	Median	40.5	40.2	7225800000	3567100000	3658700000	3787300000	1842600000
P00358	P00358	34	4	3	Glyceraldehyde-3-phosphate dehydrogenase 2	TDH2	>sp|P00358|G3P2_YEAST Glyceraldehyde-3-phosphate dehydrogenase 2 OS=Saccharomyces cerevisiae (strain ATCC 204508 / S288c) GN=TDH2 PE=1 SV=3	1	34	4	3	34	32	4	3	3	2	72	19.6	12.3	35.846	332	332	0	1.1187	1.0652	55.452	17	0	Median	1.3003	1.466	39.21	9	0	Median	0.80484	0.66145	16.311	8	0	Median	72	71.7	7656300000	3924200000	3732100000	3970900000	1739900000
P00359	P00359	42	42	12	Glyceraldehyde-3-phosphate dehydrogenase 3	TDH3	>sp|P00359|G3P3_YEAST Glyceraldehyde-3-phosphate dehydrogenase 3 OS=Saccharomyces cerevisiae (strain ATCC 204508 / S288c) GN=TDH3 PE=1 SV=3	1	42	42	12	41	39	41	39	11	10	93.1	93.1	42.8	35.746	332	332	0	0.9578	0.96256	54.479	126	0	Median	1.047	1.2001	44.167	61	0	Median	0.87307	0.73121	51.14	65	0	Median	93.1	82.5	396440000000	186940000000	209490000000	219250000000	100510000000
P00360	P00360	23	9	9	Glyceraldehyde-3-phosphate dehydrogenase 1	TDH1	>sp|P00360|G3P1_YEAST Glyceraldehyde-3-phosphate dehydrogenase 1 OS=Saccharomyces cerevisiae (strain ATCC 204508 / S288c) GN=TDH1 PE=1 SV=3	1	23	9	9	21	21	7	8	7	8	59	28.6	28.6	35.75	332	332	0	1.072	0.96215	36.305	18	0	Median	0.99382	1.1208	20.466	8	0	Median	1.1118	0.91225	38.165	10	0	Median	52.4	56.9	7309400000	3539800000	3769500000	3653600000	1889200000
P00401	P00401	1	1	1	Cytochrome c oxidase subunit 1	COX1	>sp|P00401|COX1_YEAST Cytochrome c oxidase subunit 1 OS=Saccharomyces cerevisiae (strain ATCC 204508 / S288c) GN=COX1 PE=1 SV=2	1	1	1	1	1	1	1	1	1	1	3.2	3.2	3.2	58.797	534	534	0	0.97036	0.93438	7.3647	4	0	Median	0.76729	0.87545	3.1916	2	0	Median	1.2051	0.98891	2.0002	2	0	Median	3.2	3.2	417610000	210950000	206670000	167140000	89680000
P00410	P00410	4	4	4	Cytochrome c oxidase subunit 2	COX2	>sp|P00410|COX2_YEAST Cytochrome c oxidase subunit 2 OS=Saccharomyces cerevisiae (strain ATCC 204508 / S288c) GN=COX2 PE=1 SV=1	1	4	4	4	4	3	4	3	4	3	17.5	17.5	17.5	28.567	251	251	0	0.99968	0.98235	14.738	6	0	Median	0.76491	0.85943	14.084	3	0	Median	1.1865	1.0272	4.2238	3	0	Median	17.5	13.9	540250000	268080000	272170000	271170000	153760000
P00424	P00424	6	6	4	Cytochrome c oxidase polypeptide 5A, mitochondrial	COX5A	>sp|P00424|COX5A_YEAST Cytochrome c oxidase polypeptide 5A, mitochondrial OS=Saccharomyces cerevisiae (strain ATCC 204508 / S288c) GN=COX5A PE=1 SV=1	1	6	6	4	6	5	6	5	4	3	39.2	39.2	28.8	17.14	153	153	0	1.1315	1.0364	75.506	14	0	Median	1.4795	1.6036	43.625	7	0	Median	0.93686	0.79209	72.311	7	0	Median	39.2	30.1	4982700000	2417500000	2565200000	2354100000	1154200000
P00427	P00427	8	8	8	Cytochrome c oxidase subunit 6, mitochondrial	COX6	>sp|P00427|COX6_YEAST Cytochrome c oxidase subunit 6, mitochondrial OS=Saccharomyces cerevisiae (strain ATCC 204508 / S288c) GN=COX6 PE=1 SV=1	1	8	8	8	8	8	8	8	8	8	53.4	53.4	53.4	17.341	148	148	0	1.0668	1.0136	48.812	20	0	Median	1.0446	1.1809	42.363	10	0	Median	1.0873	0.9114	40.445	10	0	Median	53.4	53.4	3264000000	1582500000	1681500000	1637100000	794520000
P00447	P00447	4	4	4	Superoxide dismutase [Mn], mitochondrial	SOD2	>sp|P00447|SODM_YEAST Superoxide dismutase [Mn], mitochondrial OS=Saccharomyces cerevisiae (strain ATCC 204508 / S288c) GN=SOD2 PE=1 SV=1	1	4	4	4	3	4	3	4	3	4	18	18	18	25.774	233	233	0	1.0916	0.97742	27.867	7	0	Median	0.80383	0.92918	17.543	3	0	Median	1.1534	1.011	36.215	4	0	Median	12	18	688500000	337990000	350510000	372930000	189750000
P00498	P00498	5	5	5	ATP phosphoribosyltransferase	HIS1	>sp|P00498|HIS1_YEAST ATP phosphoribosyltransferase OS=Saccharomyces cerevisiae (strain ATCC 204508 / S288c) GN=HIS1 PE=1 SV=1	1	5	5	5	5	4	5	4	5	4	11.8	11.8	11.8	32.266	297	297	0	0.94313	0.95218	26.03	7	0	Median	0.79807	0.95218	22.102	3	0	Median	1.0703	0.91675	30.502	4	0	Median	11.8	11.1	323960000	166650000	157320000	164620000	88771000
P00546	P00546	2	2	2	Cyclin-dependent kinase 1	CDC28	>sp|P00546|CDK1_YEAST Cyclin-dependent kinase 1 OS=Saccharomyces cerevisiae (strain ATCC 204508 / S288c) GN=CDC28 PE=1 SV=1	1	2	2	2	1	2	1	2	1	2	6.4	6.4	6.4	34.061	298	298	0	1.0571	1.0688	11.948	2	2	Median	NaN	NaN	NaN	1	1	Median	NaN	NaN	NaN	1	1	Median	3.4	6.4	87409000	36583000	50825000	29742000	16351000
P00549;P52489	P00549	52;2	52;2	52;2	Pyruvate kinase 1	CDC19	>sp|P00549|KPYK1_YEAST Pyruvate kinase 1 OS=Saccharomyces cerevisiae (strain ATCC 204508 / S288c) GN=CDC19 PE=1 SV=2	2	52	52	52	46	47	46	47	46	47	79	79	79	54.544	500	500;506	0	0.99943	0.98525	60.544	110	0	Median	1.2895	1.4811	44.465	53	0	Median	0.75375	0.64999	41.813	57	0	Median	78.2	76.6	129490000000	62408000000	67087000000	61234000000	29341000000
P00560	P00560	46	46	46	Phosphoglycerate kinase	PGK1	>sp|P00560|PGK_YEAST Phosphoglycerate kinase OS=Saccharomyces cerevisiae (strain ATCC 204508 / S288c) GN=PGK1 PE=1 SV=2	1	46	46	46	42	42	42	42	42	42	82.5	82.5	82.5	44.738	416	416	0	1.0263	0.96479	55.679	113	0	Median	1.1917	1.3574	41.504	58	0	Median	0.80864	0.67493	43.075	55	0	Median	78.6	82.5	53901000000	27343000000	26557000000	27953000000	13742000000
P00724-2;P00724	P00724-2;P00724	8;8	8;8	8;8	Invertase 2	SUC2	>sp|P00724-2|INV2_YEAST Isoform Intracellular of Invertase 2 OS=Saccharomyces cerevisiae (strain ATCC 204508 / S288c) GN=SUC2;>sp|P00724|INV2_YEAST Invertase 2 OS=Saccharomyces cerevisiae (strain ATCC 204508 / S288c) GN=SUC2 PE=1 SV=1	2	8	8	8	8	8	8	8	8	8	12.9	12.9	12.9	58.544	512	512;532	0	0.99555	1.1438	39.443	13	0	Median	0.99555	1.1438	35.552	7	0	Median	1.0706	0.88406	42.206	6	0	Median	12.9	12.9	2391800000	1481800000	910000000	1150500000	677230000
P00812	P00812	5	5	5	Arginase	CAR1	>sp|P00812|ARGI_YEAST Arginase OS=Saccharomyces cerevisiae (strain ATCC 204508 / S288c) GN=CAR1 PE=1 SV=1	1	5	5	5	4	5	4	5	4	5	15	15	15	35.662	333	333	0	0.95657	0.92978	15.24	9	0	Median	0.81645	0.89068	16.531	4	0	Median	1.1389	0.92978	16.078	5	0	Median	11.7	15	854470000	353860000	500610000	339130000	185400000
P00815	P00815	20	20	20	Histidine biosynthesis trifunctional protein;Phosphoribosyl-AMP cyclohydrolase;Phosphoribosyl-ATP pyrophosphohydrolase;Histidinol dehydrogenase	HIS4	>sp|P00815|HIS2_YEAST Histidine biosynthesis trifunctional protein OS=Saccharomyces cerevisiae (strain ATCC 204508 / S288c) GN=HIS4 PE=1 SV=3	1	20	20	20	18	17	18	17	18	17	22	22	22	87.72	799	799	0	1.1805	1.078	38.634	36	0	Median	0.98577	1.1099	36.365	18	0	Median	1.2438	1.0645	40.53	18	0	Median	21.2	19.1	4696000000	2227900000	2468100000	2511800000	1288900000
P00817	P00817	10	10	10	Inorganic pyrophosphatase	IPP1	>sp|P00817|IPYR_YEAST Inorganic pyrophosphatase OS=Saccharomyces cerevisiae (strain ATCC 204508 / S288c) GN=IPP1 PE=1 SV=4	1	10	10	10	10	7	10	7	10	7	46.3	46.3	46.3	32.299	287	287	0	0.99096	0.99087	63.652	18	0	Median	1.1257	1.257	64.319	10	0	Median	0.84803	0.7317	46.763	8	0	Median	46.3	33.8	2879000000	1466300000	1412600000	1502800000	733720000
P00830	P00830	32	32	32	ATP synthase subunit beta, mitochondrial	ATP2	>sp|P00830|ATPB_YEAST ATP synthase subunit beta, mitochondrial OS=Saccharomyces cerevisiae (strain ATCC 204508 / S288c) GN=ATP2 PE=1 SV=2	1	32	32	32	31	29	31	29	31	29	65.8	65.8	65.8	54.793	511	511	0	1.0192	0.99258	36.97	83	0	Median	0.97402	1.1106	29.688	42	0	Median	1.1529	0.89769	38.43	41	0	Median	61.6	53.2	47247000000	23716000000	23531000000	23254000000	12187000000
P00890	P00890	14	14	14	Citrate synthase, mitochondrial	CIT1	>sp|P00890|CISY1_YEAST Citrate synthase, mitochondrial OS=Saccharomyces cerevisiae (strain ATCC 204508 / S288c) GN=CIT1 PE=1 SV=2	1	14	14	14	13	11	13	11	13	11	31.3	31.3	31.3	53.359	479	479	0	1.0175	1.04	19.2	24	0	Median	0.91818	1.04	21.661	12	0	Median	1.1707	1.0209	17.364	12	0	Median	28	25.3	4697000000	2243000000	2453900000	2089000000	1132500000
P00899	P00899	3	3	3	Anthranilate synthase component 1	TRP2	>sp|P00899|TRPE_YEAST Anthranilate synthase component 1 OS=Saccharomyces cerevisiae (strain ATCC 204508 / S288c) GN=TRP2 PE=1 SV=4	1	3	3	3	3	0	3	0	3	0	5.7	5.7	5.7	56.767	507	507	0	0.65312	0.76225	104.77	3	0	Median	0.65312	0.76225	104.77	3	0	Median	NaN	NaN	NaN	0	0	Median	5.7	0	260590000	158150000	102440000	260590000	158150000
P00924	P00924	36	16	16	Enolase 1	ENO1	>sp|P00924|ENO1_YEAST Enolase 1 OS=Saccharomyces cerevisiae (strain ATCC 204508 / S288c) GN=ENO1 PE=1 SV=3	1	36	16	16	33	32	14	14	14	14	68.4	29.3	29.3	46.816	437	437	0	1.1633	1.0844	51.979	38	0	Median	1.1959	1.3774	45.454	19	0	Median	1.1059	0.94822	39.685	19	0	Median	66.1	56.1	15032000000	7034000000	7998300000	7278000000	3150200000
P00925	P00925	41	41	21	Enolase 2	ENO2	>sp|P00925|ENO2_YEAST Enolase 2 OS=Saccharomyces cerevisiae (strain ATCC 204508 / S288c) GN=ENO2 PE=1 SV=2	1	41	41	21	39	37	39	37	20	19	76.4	76.4	42.3	46.914	437	437	0	0.96406	1.0032	51.654	131	0	Median	0.9635	1.1472	45.134	66	0	Median	0.97735	0.81715	45.255	65	0	Median	76.4	67.5	170690000000	81036000000	89655000000	86509000000	40034000000
P00927	P00927	12	12	12	Threonine dehydratase, mitochondrial	ILV1	>sp|P00927|THDH_YEAST Threonine dehydratase, mitochondrial OS=Saccharomyces cerevisiae (strain ATCC 204508 / S288c) GN=ILV1 PE=1 SV=2	1	12	12	12	7	11	7	11	7	11	26.6	26.6	26.6	63.83	576	576	0	0.99242	1.0547	37.938	13	0	Median	1.046	1.0904	35.3	7	0	Median	0.97681	0.87843	36.976	6	0	Median	16	26.4	1211400000	616850000	594590000	503770000	242750000
P00931	P00931	6	6	6	Tryptophan synthase	TRP5	>sp|P00931|TRP_YEAST Tryptophan synthase OS=Saccharomyces cerevisiae (strain ATCC 204508 / S288c) GN=TRP5 PE=1 SV=1	1	6	6	6	4	3	4	3	4	3	13	13	13	76.625	707	707	0	0.96833	0.90493	17.179	5	0	Median	0.96833	1.1861	73.9	5	3	Median	1.0255	0.88122	11.464	3	0	Median	8.5	7.4	296650000	138680000	157970000	155980000	60456000
P00942	P00942	17	17	17	Triosephosphate isomerase	TPI1	>sp|P00942|TPIS_YEAST Triosephosphate isomerase OS=Saccharomyces cerevisiae (strain ATCC 204508 / S288c) GN=TPI1 PE=1 SV=2	1	17	17	17	16	12	16	12	16	12	63.3	63.3	63.3	26.795	248	248	0	1.0835	1.0363	65.736	36	0	Median	1.513	1.7333	52.069	21	0	Median	0.75774	0.61015	30.335	15	0	Median	63.3	53.2	13008000000	6140400000	6867900000	7170300000	3020400000
P00950	P00950	25	25	25	Phosphoglycerate mutase 1	GPM1	>sp|P00950|PMG1_YEAST Phosphoglycerate mutase 1 OS=Saccharomyces cerevisiae (strain ATCC 204508 / S288c) GN=GPM1 PE=1 SV=3	1	25	25	25	24	23	24	23	24	23	73.3	73.3	73.3	27.608	247	247	0	0.94836	0.99331	41.967	53	0	Median	1.1275	1.2919	34.921	27	0	Median	0.90527	0.74659	31.855	26	0	Median	70.9	68.8	46861000000	19223000000	27638000000	23932000000	10231000000
P00958	P00958	46	46	46	Methionine--tRNA ligase, cytoplasmic	MES1	>sp|P00958|SYMC_YEAST Methionine--tRNA ligase, cytoplasmic OS=Saccharomyces cerevisiae (strain ATCC 204508 / S288c) GN=MES1 PE=1 SV=4	1	46	46	46	42	41	42	41	42	41	55.3	55.3	55.3	85.677	751	751	0	0.93355	0.94259	67.276	114	0	Median	1.1236	1.2765	47.063	58	0	Median	0.67858	0.56607	43.915	56	0	Median	49.8	50.5	109270000000	52920000000	56352000000	59543000000	27020000000
P01120	P01120	5	5	5	Ras-like protein 2	RAS2	>sp|P01120|RAS2_YEAST Ras-like protein 2 OS=Saccharomyces cerevisiae (strain ATCC 204508 / S288c) GN=RAS2 PE=1 SV=4	1	5	5	5	3	5	3	5	3	5	18.9	18.9	18.9	34.705	322	322	0	1.2183	1.006	38.292	8	0	Median	1.3853	1.5326	30.756	3	0	Median	1.1058	0.88491	36.531	5	0	Median	10.9	18.9	893670000	257550000	636120000	421580000	113170000
P02294;P02293	P02294;P02293	8;8	8;8	8;8	Histone H2B.2;Histone H2B.1	HTB2;HTB1	>sp|P02294|H2B2_YEAST Histone H2B.2 OS=Saccharomyces cerevisiae (strain ATCC 204508 / S288c) GN=HTB2 PE=1 SV=2;>sp|P02293|H2B1_YEAST Histone H2B.1 OS=Saccharomyces cerevisiae (strain ATCC 204508 / S288c) GN=HTB1 PE=1 SV=2	2	8	8	8	8	6	8	6	8	6	49.6	49.6	49.6	14.237	131	131;131	0	0.97019	0.92844	36.771	14	0	Median	0.70412	0.80498	39.962	8	0	Median	1.3324	1.118	32.515	6	0	Median	49.6	42	13773000000	6828400000	6944300000	7449900000	4676800000
P02309	P02309	5	5	5	Histone H4	HHF1	>sp|P02309|H4_YEAST Histone H4 OS=Saccharomyces cerevisiae (strain ATCC 204508 / S288c) GN=HHF1 PE=1 SV=2	1	5	5	5	4	4	4	4	4	4	43.7	43.7	43.7	11.368	103	103	0	0.8089	0.76466	16.182	4	0	Median	0.78317	0.84926	41	4	2	Median	0.9441	0.83661	51.056	5	3	Median	43.7	36.9	682310000	402640000	279660000	447340000	272980000
P02400	P02400	3	3	3	60S acidic ribosomal protein P2-beta	RPP2B	>sp|P02400|RLA4_YEAST 60S acidic ribosomal protein P2-beta OS=Saccharomyces cerevisiae (strain ATCC 204508 / S288c) GN=RPP2B PE=1 SV=2	1	3	3	3	3	1	3	1	3	1	50	50	50	11.05	110	110	0	0.79547	0.94394	35.386	4	0	Median	0.61602	0.75036	35.035	3	0	Median	NaN	NaN	NaN	1	0	Median	50	27.3	1380900000	704120000	676790000	729100000	445710000
P02406	P02406	7	7	7	60S ribosomal protein L28	RPL28	>sp|P02406|RL28_YEAST 60S ribosomal protein L28 OS=Saccharomyces cerevisiae (strain ATCC 204508 / S288c) GN=RPL28 PE=1 SV=3	1	7	7	7	6	7	6	7	6	7	43	43	43	16.721	149	149	0	1.0443	1.2031	50.268	20	0	Median	1.0504	1.2132	52.86	9	0	Median	0.94414	0.79232	44.093	11	0	Median	41.6	43	16485000000	8140700000	8344400000	8037700000	4395800000
P14127;P02407	P14127;P02407	21;21	21;21	21;21	40S ribosomal protein S17-B;40S ribosomal protein S17-A	RPS17B;RPS17A	>sp|P14127|RS17B_YEAST 40S ribosomal protein S17-B OS=Saccharomyces cerevisiae (strain ATCC 204508 / S288c) GN=RPS17B PE=1 SV=1;>sp|P02407|RS17A_YEAST 40S ribosomal protein S17-A OS=Saccharomyces cerevisiae (strain ATCC 204508 / S288c) GN=RPS17A PE=1 SV=1	2	21	21	21	21	20	21	20	21	20	78.7	78.7	78.7	15.803	136	136;136	0	1.1291	1.0994	55.281	63	0	Median	1.1291	1.2535	55.284	33	0	Median	1.0731	0.8532	44.304	30	0	Median	78.7	78.7	58401000000	27383000000	31019000000	28687000000	14400000000
P02557	P02557	6	6	6	Tubulin beta chain	TUB2	>sp|P02557|TBB_YEAST Tubulin beta chain OS=Saccharomyces cerevisiae (strain ATCC 204508 / S288c) GN=TUB2 PE=1 SV=2	1	6	6	6	6	2	6	2	6	2	14.9	14.9	14.9	50.922	457	457	0	0.93532	0.90275	45.359	4	0	Median	0.6293	0.70111	53.545	3	0	Median	1.4034	1.1886	3.1599	2	1	Median	14.9	5.5	390510000	201600000	188920000	268160000	151570000
P02829	P02829	39	6	6	ATP-dependent molecular chaperone HSP82	HSP82	>sp|P02829|HSP82_YEAST ATP-dependent molecular chaperone HSP82 OS=Saccharomyces cerevisiae (strain ATCC 204508 / S288c) GN=HSP82 PE=1 SV=1	1	39	6	6	35	37	4	6	4	6	47.2	8.3	8.3	81.405	709	709	0	0.90836	0.806	32.563	10	0	Median	0.74128	0.84793	31.657	4	0	Median	0.95112	0.806	35.596	6	0	Median	44.4	45.7	597930000	293450000	304470000	301610000	137690000
P02992	P02992	8	8	8	Elongation factor Tu, mitochondrial	TUF1	>sp|P02992|EFTU_YEAST Elongation factor Tu, mitochondrial OS=Saccharomyces cerevisiae (strain ATCC 204508 / S288c) GN=TUF1 PE=1 SV=1	1	8	8	8	8	6	8	6	8	6	22.7	22.7	22.7	47.972	437	437	0	0.96521	1.0441	21.578	13	0	Median	0.93149	1.0808	17.292	8	0	Median	1.1584	1.0004	24.65	5	0	Median	22.7	17.8	2497400000	1243300000	1254100000	1588700000	801120000
P02994	P02994	41	41	41	Elongation factor 1-alpha	TEF1	>sp|P02994|EF1A_YEAST Elongation factor 1-alpha OS=Saccharomyces cerevisiae (strain ATCC 204508 / S288c) GN=TEF1 PE=1 SV=1	1	41	41	41	38	38	38	38	38	38	70.5	70.5	70.5	50.032	458	458	0	0.93753	0.89829	69.529	85	0	Median	1.3121	1.4785	62.035	41	0	Median	0.7228	0.59897	40.393	44	0	Median	62.4	65.7	131280000000	66158000000	65118000000	73262000000	36581000000
P03872	P03872	3	3	3	Partitioning protein REP2	REP2	>sp|P03872|REP2_YEAST Partitioning protein REP2 OS=Saccharomyces cerevisiae (strain ATCC 204508 / S288c) GN=REP2 PE=1 SV=1	1	3	3	3	3	3	3	3	3	3	12.2	12.2	12.2	33.196	296	296	0	0.88449	0.87965	52.159	8	0	Median	1.1276	1.2698	68.26	4	0	Median	0.88013	0.79759	38.538	4	0	Median	12.2	12.2	430110000	227440000	202670000	222720000	119530000
P03874	P03874	3	3	3	Cytochrome B pre-mRNA-processing protein 2	CBP2	>sp|P03874|CBP2_YEAST Cytochrome B pre-mRNA-processing protein 2 OS=Saccharomyces cerevisiae (strain ATCC 204508 / S288c) GN=CBP2 PE=1 SV=2	1	3	3	3	3	2	3	2	3	2	6.8	6.8	6.8	73.86	630	630	0	0.88255	0.9232	30.326	5	3	Median	0.73815	0.82079	16.629	2	2	Median	1.2095	1.0073	36.249	3	1	Median	6.8	5.6	130710000	66435000	64270000	51527000	27459000
P03965	P03965	17	16	16	Carbamoyl-phosphate synthase arginine-specific large chain	CPA2	>sp|P03965|CARB_YEAST Carbamoyl-phosphate synthase arginine-specific large chain OS=Saccharomyces cerevisiae (strain ATCC 204508 / S288c) GN=CPA2 PE=1 SV=1	1	17	16	16	15	15	14	14	14	14	18.6	17.5	17.5	123.91	1118	1118	0	0.99677	1.0866	25.648	21	0	Median	0.89965	1.0702	23.674	11	0	Median	1.3923	1.1573	27.924	10	0	Median	15.3	16.8	1637000000	799400000	837600000	732590000	409830000
P04037	P04037	5	5	5	Cytochrome c oxidase subunit 4, mitochondrial	COX4	>sp|P04037|COX4_YEAST Cytochrome c oxidase subunit 4, mitochondrial OS=Saccharomyces cerevisiae (strain ATCC 204508 / S288c) GN=COX4 PE=1 SV=1	1	5	5	5	5	5	5	5	5	5	47.7	47.7	47.7	17.142	155	155	0	1.1038	1.1398	42.443	10	0	Median	1.0973	1.1667	32.553	5	0	Median	1.3987	1.1161	45.945	5	0	Median	47.7	47.7	1087000000	502790000	584190000	460740000	234890000
P04046	P04046	4	4	4	Amidophosphoribosyltransferase	ADE4	>sp|P04046|PUR1_YEAST Amidophosphoribosyltransferase OS=Saccharomyces cerevisiae (strain ATCC 204508 / S288c) GN=ADE4 PE=1 SV=2	1	4	4	4	4	2	4	2	4	2	7.8	7.8	7.8	56.719	510	510	0	0.96347	1.0645	22.763	6	0	Median	0.92107	1.0645	24.633	4	0	Median	1.1694	1.0466	25.906	2	0	Median	7.8	4.5	387560000	190480000	197070000	253310000	131870000
P04050	P04050	6	5	5	DNA-directed RNA polymerase II subunit RPB1	RPO21	>sp|P04050|RPB1_YEAST DNA-directed RNA polymerase II subunit RPB1 OS=Saccharomyces cerevisiae (strain ATCC 204508 / S288c) GN=RPO21 PE=1 SV=2	1	6	5	5	5	3	4	2	4	2	4.4	3.9	3.9	191.61	1733	1733	0	0.81066	0.89708	52.386	5	0	Median	0.79458	0.87696	60.22	4	0	Median	2.1859	1.9281	55.788	2	1	Median	3.9	2.1	217160000	92001000	125160000	143110000	66022000
P04076	P04076	9	9	9	Argininosuccinate lyase	ARG4	>sp|P04076|ARLY_YEAST Argininosuccinate lyase OS=Saccharomyces cerevisiae (strain ATCC 204508 / S288c) GN=ARG4 PE=1 SV=2	1	9	9	9	8	6	8	6	8	6	21.2	21.2	21.2	51.989	463	463	0	0.82148	0.94737	48.704	9	0	Median	1.0561	1.2155	32.912	4	0	Median	0.60846	0.51495	44.533	5	0	Median	21.2	12.7	1183400000	569370000	614070000	548700000	288030000
P04147	P04147	25	25	25	Polyadenylate-binding protein, cytoplasmic and nuclear	PAB1	>sp|P04147|PABP_YEAST Polyadenylate-binding protein, cytoplasmic and nuclear OS=Saccharomyces cerevisiae (strain ATCC 204508 / S288c) GN=PAB1 PE=1 SV=4	1	25	25	25	24	25	24	25	24	25	44.2	44.2	44.2	64.343	577	577	0	1.0107	0.90197	38.249	43	0	Median	0.70461	0.79506	37.25	22	0	Median	1.5735	1.3079	35.934	21	0	Median	42.6	44.2	8188900000	4175500000	4013300000	4550900000	2664900000
P04161	P04161	2	2	2	Phosphoribosylglycinamide formyltransferase	ADE8	>sp|P04161|PUR3_YEAST Phosphoribosylglycinamide formyltransferase OS=Saccharomyces cerevisiae (strain ATCC 204508 / S288c) GN=ADE8 PE=1 SV=1	1	2	2	2	2	1	2	1	2	1	12.6	12.6	12.6	23.54	214	214	0.00091575	0.88636	0.75597	37.123	3	1	Median	0.94372	0.98586	47.814	2	1	Median	NaN	NaN	NaN	1	0	Median	12.6	8.4	123910000	64138000	59777000	77142000	40339000
P04449	P04449	16	16	4	60S ribosomal protein L24-A	RPL24A	>sp|P04449|RL24A_YEAST 60S ribosomal protein L24-A OS=Saccharomyces cerevisiae (strain ATCC 204508 / S288c) GN=RPL24A PE=1 SV=1	1	16	16	4	16	16	16	16	4	4	71	71	18.7	17.613	155	155	0	0.99432	0.95161	46.809	56	0	Median	0.75873	0.8496	51.459	28	0	Median	1.2941	1.0497	41.53	28	0	Median	71	71	34206000000	16568000000	17638000000	17632000000	9342800000
P04456	P04456	11	11	11	60S ribosomal protein L25	RPL25	>sp|P04456|RL25_YEAST 60S ribosomal protein L25 OS=Saccharomyces cerevisiae (strain ATCC 204508 / S288c) GN=RPL25 PE=1 SV=4	1	11	11	11	11	10	11	10	11	10	59.9	59.9	59.9	15.757	142	142	0	1.0799	0.89946	54.428	24	0	Median	0.91844	1.0088	42.814	12	0	Median	1.0887	0.86936	65.608	12	0	Median	59.9	54.9	9274800000	4525900000	4748900000	4833700000	2610600000
P04650	P04650	4	4	4	60S ribosomal protein L39	RPL39	>sp|P04650|RL39_YEAST 60S ribosomal protein L39 OS=Saccharomyces cerevisiae (strain ATCC 204508 / S288c) GN=RPL39 PE=1 SV=3	1	4	4	4	4	4	4	4	4	4	45.1	45.1	45.1	6.3415	51	51	0	1.0713	1.0401	87.748	14	0	Median	1.2765	1.4198	94.276	7	0	Median	0.77788	0.67167	80.885	7	0	Median	45.1	45.1	10600000000	4923200000	5676400000	5986600000	2921900000
P04710	P04710	5	3	3	ADP,ATP carrier protein 1	AAC1	>sp|P04710|ADT1_YEAST ADP,ATP carrier protein 1 OS=Saccharomyces cerevisiae (strain ATCC 204508 / S288c) GN=AAC1 PE=1 SV=1	1	5	3	3	4	5	2	3	2	3	10.7	6.1	6.1	34.12	309	309	0	0.97454	0.90521	39.595	7	0	Median	0.97454	1.1349	24.856	3	0	Median	0.82551	0.68026	45.344	4	0	Median	10.7	10.7	3253700000	1599400000	1654300000	1545000000	681260000
P04801	P04801	17	17	17	Threonine--tRNA ligase, cytoplasmic	THS1	>sp|P04801|SYTC_YEAST Threonine--tRNA ligase, cytoplasmic OS=Saccharomyces cerevisiae (strain ATCC 204508 / S288c) GN=THS1 PE=1 SV=2	1	17	17	17	13	16	13	16	13	16	26.4	26.4	26.4	84.519	734	734	0	0.90655	0.90396	36.506	23	0	Median	0.79852	0.90265	34.076	10	0	Median	1.1052	1.0152	38.569	13	0	Median	21.5	25.1	1769600000	1055000000	714560000	751630000	475140000
P04802	P04802	17	17	17	Aspartate--tRNA ligase, cytoplasmic	DPS1	>sp|P04802|SYDC_YEAST Aspartate--tRNA ligase, cytoplasmic OS=Saccharomyces cerevisiae (strain ATCC 204508 / S288c) GN=DPS1 PE=1 SV=3	1	17	17	17	14	14	14	14	14	14	34.8	34.8	34.8	63.515	557	557	0	1.021	1.035	36.415	27	0	Median	0.90607	1.0295	21.901	12	0	Median	1.1801	1.035	42.972	15	0	Median	28.7	27.8	4740300000	2441000000	2299400000	2132100000	1182900000
P04806	P04806	14	14	13	Hexokinase-1	HXK1	>sp|P04806|HXKA_YEAST Hexokinase-1 OS=Saccharomyces cerevisiae (strain ATCC 204508 / S288c) GN=HXK1 PE=1 SV=2	1	14	14	13	10	13	10	13	9	12	36.5	36.5	34.2	53.738	485	485	0	0.98104	1.087	46.565	27	0	Median	0.99135	1.1654	35.687	12	0	Median	0.9641	0.82238	43.487	15	0	Median	25.4	31.8	6786300000	3267900000	3518400000	2795000000	1246300000
P04807	P04807	5	4	4	Hexokinase-2	HXK2	>sp|P04807|HXKB_YEAST Hexokinase-2 OS=Saccharomyces cerevisiae (strain ATCC 204508 / S288c) GN=HXK2 PE=1 SV=4	1	5	4	4	5	2	4	1	4	1	14.6	12.3	12.3	53.942	486	486	0	0.93124	1.0367	13.986	6	4	Median	0.91959	1.0151	9.9343	5	4	Median	NaN	NaN	NaN	1	0	Median	14.6	3.9	253490000	132010000	121480000	213150000	117360000
P04817	P04817	1	1	1	Arginine permease	CAN1	>sp|P04817|CAN1_YEAST Arginine permease OS=Saccharomyces cerevisiae (strain ATCC 204508 / S288c) GN=CAN1 PE=1 SV=2	1	1	1	1	0	1	0	1	0	1	2	2	2	65.785	590	590	0	NaN	NaN	NaN	0	0	Median	NaN	NaN	NaN	0	0	Median	NaN	NaN	NaN	0	0	Median	0	2	19800000	8892000	10908000	0	0
P04840	P04840	15	15	15	Mitochondrial outer membrane protein porin 1	POR1	>sp|P04840|VDAC1_YEAST Mitochondrial outer membrane protein porin 1 OS=Saccharomyces cerevisiae (strain ATCC 204508 / S288c) GN=POR1 PE=1 SV=4	1	15	15	15	15	15	15	15	15	15	62.2	62.2	62.2	30.428	283	283	0	0.98896	0.9536	29.554	32	0	Median	0.79739	0.91922	25.339	14	0	Median	1.1805	0.96358	32.902	18	0	Median	62.2	62.2	26388000000	12784000000	13604000000	13485000000	7024200000
P04912;P04911	P04912;P04911	2;2	2;2	2;2	Histone H2A.2;Histone H2A.1	HTA2;HTA1	>sp|P04912|H2A2_YEAST Histone H2A.2 OS=Saccharomyces cerevisiae (strain ATCC 204508 / S288c) GN=HTA2 PE=1 SV=2;>sp|P04911|H2A1_YEAST Histone H2A.1 OS=Saccharomyces cerevisiae (strain ATCC 204508 / S288c) GN=HTA1 PE=1 SV=2	2	2	2	2	2	2	2	2	2	2	9.1	9.1	9.1	13.989	132	132;132	0	0.84389	0.86091	45.182	4	0	Median	0.56887	0.64588	25.993	2	0	Median	1.4822	1.2309	35.911	2	0	Median	9.1	9.1	3251000000	1584000000	1667000000	1530600000	1032700000
P05030;P19657	P05030;P19657	33;28	33;28	33;28	Plasma membrane ATPase 1;Plasma membrane ATPase 2	PMA1;PMA2	>sp|P05030|PMA1_YEAST Plasma membrane ATPase 1 OS=Saccharomyces cerevisiae (strain ATCC 204508 / S288c) GN=PMA1 PE=1 SV=2;>sp|P19657|PMA2_YEAST Plasma membrane ATPase 2 OS=Saccharomyces cerevisiae (strain ATCC 204508 / S288c) GN=PMA2 PE=1 SV=3	2	33	33	33	26	29	26	29	26	29	24.6	24.6	24.6	99.618	918	918;947	0	0.95688	0.99037	50.293	72	0	Median	0.95519	1.0599	42.665	33	0	Median	0.97314	0.84017	44.729	39	0	Median	22.5	22.9	24028000000	11633000000	12396000000	11593000000	5956700000
P05317	P05317	13	13	13	60S acidic ribosomal protein P0	RPP0	>sp|P05317|RLA0_YEAST 60S acidic ribosomal protein P0 OS=Saccharomyces cerevisiae (strain ATCC 204508 / S288c) GN=RPP0 PE=1 SV=2	1	13	13	13	13	10	13	10	13	10	37.2	37.2	37.2	33.717	312	312	0	1.0214	0.91051	32.674	23	0	Median	0.85887	1.0086	36.506	12	0	Median	1.0726	0.87098	24.441	11	0	Median	37.2	25	9735100000	4717400000	5017600000	4954600000	2592800000
P05319	P05319	8	8	8	60S acidic ribosomal protein P2-alpha	RPP2A	>sp|P05319|RLA2_YEAST 60S acidic ribosomal protein P2-alpha OS=Saccharomyces cerevisiae (strain ATCC 204508 / S288c) GN=RPP2A PE=1 SV=1	1	8	8	8	8	8	8	8	8	8	83	83	83	10.746	106	106	0	0.97624	1.0267	21.213	16	0	Median	0.76842	0.89726	23.726	8	0	Median	1.3136	1.0788	19.57	8	0	Median	83	83	4025200000	2096200000	1929000000	1994200000	1177400000
P05373	P05373	2	2	2	Delta-aminolevulinic acid dehydratase	HEM2	>sp|P05373|HEM2_YEAST Delta-aminolevulinic acid dehydratase OS=Saccharomyces cerevisiae (strain ATCC 204508 / S288c) GN=HEM2 PE=1 SV=2	1	2	2	2	1	2	1	2	1	2	7.9	7.9	7.9	37.74	342	342	0	1.2008	1.3235	26.007	4	0	Median	1.2008	1.3479	5.7906	2	0	Median	1.1998	1.0445	36.675	2	0	Median	3.5	7.9	160180000	72647000	87533000	78425000	33367000
P05453	P05453	7	7	7	Eukaryotic peptide chain release factor GTP-binding subunit	SUP35	>sp|P05453|ERF3_YEAST Eukaryotic peptide chain release factor GTP-binding subunit OS=Saccharomyces cerevisiae (strain ATCC 204508 / S288c) GN=SUP35 PE=1 SV=1	1	7	7	7	6	6	6	6	6	6	11.1	11.1	11.1	76.55	685	685	0	1.1046	1.2046	42.421	11	0	Median	1.368	1.6439	27.573	5	0	Median	0.8288	0.71414	34.983	6	0	Median	7.6	10.5	575430000	290720000	284720000	337160000	165890000
P05626	P05626	8	8	8	ATP synthase subunit 4, mitochondrial	ATP4	>sp|P05626|ATPF_YEAST ATP synthase subunit 4, mitochondrial OS=Saccharomyces cerevisiae (strain ATCC 204508 / S288c) GN=ATP4 PE=1 SV=2	1	8	8	8	7	8	7	8	7	8	29.1	29.1	29.1	26.925	244	244	0	1.0748	1.0506	24.645	20	0	Median	0.82235	0.95211	25.385	10	0	Median	1.4337	1.177	24.363	10	0	Median	25.8	29.1	4930300000	2459900000	2470400000	2332400000	1407100000
P05694	P05694	20	20	20	5-methyltetrahydropteroyltriglutamate--homocysteine methyltransferase	MET6	>sp|P05694|METE_YEAST 5-methyltetrahydropteroyltriglutamate--homocysteine methyltransferase OS=Saccharomyces cerevisiae (strain ATCC 204508 / S288c) GN=MET6 PE=1 SV=4	1	20	20	20	18	15	18	15	18	15	27.8	27.8	27.8	85.859	767	767	0	1.1759	1.0492	49.469	28	0	Median	1.2692	1.4457	46.071	14	0	Median	1.0688	0.91988	34.793	14	0	Median	24.8	20.9	5194000000	2428600000	2765400000	3184000000	1460600000
P05737	P05737	16	16	5	60S ribosomal protein L7-A	RPL7A	>sp|P05737|RL7A_YEAST 60S ribosomal protein L7-A OS=Saccharomyces cerevisiae (strain ATCC 204508 / S288c) GN=RPL7A PE=1 SV=3	1	16	16	5	14	15	14	15	5	5	36.5	36.5	11.9	27.638	244	244	0	1.103	0.97907	34.548	35	0	Median	0.63962	0.74499	29.63	17	0	Median	1.2986	1.0887	28.354	18	0	Median	29.5	36.5	29586000000	14058000000	15528000000	14922000000	8222000000
P05738;P51401	P05738;P51401	13;10	13;10	13;10	60S ribosomal protein L9-A;60S ribosomal protein L9-B	RPL9A;RPL9B	>sp|P05738|RL9A_YEAST 60S ribosomal protein L9-A OS=Saccharomyces cerevisiae (strain ATCC 204508 / S288c) GN=RPL9A PE=1 SV=2;>sp|P51401|RL9B_YEAST 60S ribosomal protein L9-B OS=Saccharomyces cerevisiae (strain ATCC 204508 / S288c) GN=RPL9B PE=1 SV=1	2	13	13	13	12	11	12	11	12	11	65.4	65.4	65.4	21.569	191	191;191	0	1.0509	0.95285	38.35	16	0	Median	1.2018	1.3674	33.466	7	0	Median	1.029	0.78796	20.909	9	0	Median	65.4	50.8	3614300000	1918200000	1696200000	1928500000	1074500000
P05739	P05739	18	18	11	60S ribosomal protein L6-B	RPL6B	>sp|P05739|RL6B_YEAST 60S ribosomal protein L6-B OS=Saccharomyces cerevisiae (strain ATCC 204508 / S288c) GN=RPL6B PE=1 SV=4	1	18	18	11	17	17	17	17	11	11	71	71	37.5	19.986	176	176	0	0.80663	0.86505	47.193	33	0	Median	0.64879	0.72485	23.582	16	0	Median	1.6806	1.3503	55.608	17	0	Median	62.5	65.3	19144000000	11603000000	7540900000	10415000000	7489400000
P05744	P05744	13	13	3	60S ribosomal protein L33-A	RPL33A	>sp|P05744|RL33A_YEAST 60S ribosomal protein L33-A OS=Saccharomyces cerevisiae (strain ATCC 204508 / S288c) GN=RPL33A PE=1 SV=3	1	13	13	3	13	12	13	12	3	3	66.4	66.4	25.2	12.154	107	107	0	0.94391	0.91707	31.62	31	0	Median	0.714	0.82619	24.531	16	0	Median	1.307	1.1114	31.981	15	0	Median	66.4	65.4	13107000000	6612700000	6493900000	6800000000	3946500000
P05745	P05745	15	3	3	60S ribosomal protein L36-A	RPL36A	>sp|P05745|RL36A_YEAST 60S ribosomal protein L36-A OS=Saccharomyces cerevisiae (strain ATCC 204508 / S288c) GN=RPL36A PE=1 SV=3	1	15	3	3	14	14	2	3	2	3	78	12	12	11.124	100	100	0	1.0155	1.0035	22.412	6	0	Median	0.90787	0.98132	14.816	3	0	Median	1.2858	1.0262	31.123	3	0	Median	78	73	1878600000	777150000	1101400000	605180000	289320000
P05747	P05747	2	2	2	60S ribosomal protein L29	RPL29	>sp|P05747|RL29_YEAST 60S ribosomal protein L29 OS=Saccharomyces cerevisiae (strain ATCC 204508 / S288c) GN=RPL29 PE=1 SV=3	1	2	2	2	1	2	1	2	1	2	32.2	32.2	32.2	6.6687	59	59	0	1.4906	1.7202	24.102	3	3	Median	1.5037	1.7997	6.3838	2	2	Median	NaN	NaN	NaN	1	1	Median	13.6	32.2	1424100000	480790000	943340000	781990000	217440000
P05748	P05748	13	13	2	60S ribosomal protein L15-A	RPL15A	>sp|P05748|RL15A_YEAST 60S ribosomal protein L15-A OS=Saccharomyces cerevisiae (strain ATCC 204508 / S288c) GN=RPL15A PE=1 SV=3	1	13	13	2	13	12	13	12	2	2	48	48	5.4	24.422	204	204	0	0.97267	1.0468	35.618	39	0	Median	0.96965	1.1224	31.142	22	0	Median	0.97267	0.85684	40.978	17	0	Median	48	47.5	13316000000	6172500000	7143700000	7621600000	3830700000
P05749;P56628	P05749;P56628	6;3	6;3	6;3	60S ribosomal protein L22-A;60S ribosomal protein L22-B	RPL22A;RPL22B	>sp|P05749|RL22A_YEAST 60S ribosomal protein L22-A OS=Saccharomyces cerevisiae (strain ATCC 204508 / S288c) GN=RPL22A PE=1 SV=3;>sp|P56628|RL22B_YEAST 60S ribosomal protein L22-B OS=Saccharomyces cerevisiae (strain ATCC 204508 / S288c) GN=RPL22B PE=1 SV=2	2	6	6	6	6	5	6	5	6	5	56.2	56.2	56.2	13.693	121	121;122	0	1.0046	1.044	32.267	10	0	Median	0.8662	0.98075	38.546	6	0	Median	1.4917	1.2891	23.815	4	0	Median	56.2	52.9	588200000	276470000	311720000	373790000	189580000
P05750	P05750	25	25	25	40S ribosomal protein S3	RPS3	>sp|P05750|RS3_YEAST 40S ribosomal protein S3 OS=Saccharomyces cerevisiae (strain ATCC 204508 / S288c) GN=RPS3 PE=1 SV=5	1	25	25	25	25	23	25	23	25	23	82.5	82.5	82.5	26.502	240	240	0	0.98334	1.0178	38.27	53	0	Median	0.97435	1.0975	26.391	28	0	Median	1.048	0.84018	38.062	25	0	Median	82.5	82.5	33635000000	16053000000	17582000000	16317000000	8250600000
P05755	P05755	17	17	2	40S ribosomal protein S9-B	RPS9B	>sp|P05755|RS9B_YEAST 40S ribosomal protein S9-B OS=Saccharomyces cerevisiae (strain ATCC 204508 / S288c) GN=RPS9B PE=1 SV=4	1	17	17	2	17	17	17	17	2	2	64.6	64.6	8.2	22.298	195	195	0	0.8283	0.86887	48.595	42	0	Median	0.79507	0.88478	49.697	22	0	Median	0.95639	0.80574	43.62	20	0	Median	64.6	64.6	18935000000	9326400000	9608400000	9927200000	5300200000
P05756	P05756	10	10	10	40S ribosomal protein S13	RPS13	>sp|P05756|RS13_YEAST 40S ribosomal protein S13 OS=Saccharomyces cerevisiae (strain ATCC 204508 / S288c) GN=RPS13 PE=1 SV=3	1	10	10	10	9	9	9	9	9	9	64.9	64.9	64.9	17.029	151	151	0	0.70557	0.81297	35.627	17	0	Median	0.62342	0.71353	6.2622	9	0	Median	1.6752	1.3422	22.996	8	0	Median	53	60.3	8995000000	4531600000	4463400000	4927500000	2960600000
P05759	P05759	13	13	9	Ubiquitin-40S ribosomal protein S31;Ubiquitin;40S ribosomal protein S31	RPS31	>sp|P05759|RS27A_YEAST Ubiquitin-40S ribosomal protein S31 OS=Saccharomyces cerevisiae (strain ATCC 204508 / S288c) GN=RPS31 PE=1 SV=3	1	13	13	9	12	11	12	11	9	8	63.8	63.8	33.6	17.216	152	152	0	1.1911	1.1068	77.473	27	0	Median	1.5496	1.744	67.41	15	0	Median	0.7655	0.63314	40.867	12	0	Median	53.3	55.9	19607000000	9028200000	10579000000	9960500000	3737300000
P06103	P06103	10	10	10	Eukaryotic translation initiation factor 3 subunit B	PRT1	>sp|P06103|EIF3B_YEAST Eukaryotic translation initiation factor 3 subunit B OS=Saccharomyces cerevisiae (strain ATCC 204508 / S288c) GN=PRT1 PE=1 SV=1	1	10	10	10	5	8	5	8	5	8	12.2	12.2	12.2	88.129	763	763	0	1.0226	0.932	27.669	9	0	Median	0.87208	0.94901	31.428	4	0	Median	1.241	0.932	28.113	5	0	Median	5.5	10	568680000	276770000	291910000	258790000	144230000
P06105	P06105	34	34	34	Protein SCP160	SCP160	>sp|P06105|SC160_YEAST Protein SCP160 OS=Saccharomyces cerevisiae (strain ATCC 204508 / S288c) GN=SCP160 PE=1 SV=3	1	34	34	34	33	29	33	29	33	29	27.2	27.2	27.2	134.81	1222	1222	0	0.94857	0.85463	47.915	60	0	Median	0.72128	0.84212	48.46	32	0	Median	1.3057	1.105	47.099	28	0	Median	26.4	24.1	14371000000	3802600000	10569000000	7130600000	2455600000
P06106	P06106	9	9	9	Protein MET17;O-acetylhomoserine sulfhydrylase;O-acetylserine sulfhydrylase	MET17	>sp|P06106|MET17_YEAST Protein MET17 OS=Saccharomyces cerevisiae (strain ATCC 204508 / S288c) GN=MET17 PE=1 SV=3	1	9	9	9	7	7	7	7	7	7	24.3	24.3	24.3	48.671	444	444	0	0.9187	0.93161	29.131	14	0	Median	0.87824	1.0164	16.594	7	0	Median	1.0303	0.80717	31.963	7	0	Median	19.8	17.1	1331500000	630250000	701260000	481050000	255650000
P06115	P06115	4	4	4	Catalase T	CTT1	>sp|P06115|CATT_YEAST Catalase T OS=Saccharomyces cerevisiae (strain ATCC 204508 / S288c) GN=CTT1 PE=1 SV=3	1	4	4	4	3	4	3	4	3	4	8.9	8.9	8.9	64.583	562	562	0	1.0058	1.0564	43.912	8	0	Median	1.0634	1.1718	37.899	4	0	Median	0.92186	0.7781	34.862	4	0	Median	7.5	8.9	786790000	417550000	369240000	359780000	190260000
P06168	P06168	23	23	23	Ketol-acid reductoisomerase, mitochondrial	ILV5	>sp|P06168|ILV5_YEAST Ketol-acid reductoisomerase, mitochondrial OS=Saccharomyces cerevisiae (strain ATCC 204508 / S288c) GN=ILV5 PE=1 SV=1	1	23	23	23	21	17	21	17	21	17	55.4	55.4	55.4	44.368	395	395	0	1.0932	1.0746	50.045	38	0	Median	1.1902	1.3363	37.294	20	0	Median	1.0101	0.86926	41.913	18	0	Median	47.8	43.8	6435900000	3175000000	3260900000	3000000000	1476600000
P06169	P06169	27	27	22	Pyruvate decarboxylase isozyme 1	PDC1	>sp|P06169|PDC1_YEAST Pyruvate decarboxylase isozyme 1 OS=Saccharomyces cerevisiae (strain ATCC 204508 / S288c) GN=PDC1 PE=1 SV=7	1	27	27	22	27	23	27	23	22	19	49.6	49.6	41.9	61.495	563	563	0	1.0578	1.0084	40.633	77	0	Median	1.0578	1.1829	31.694	39	0	Median	1.0344	0.84593	38.27	38	0	Median	49.6	43.3	48864000000	23757000000	25108000000	24993000000	12048000000
P06182	P06182	1	1	1	Cytochrome c heme lyase	CYC3	>sp|P06182|CCHL_YEAST Cytochrome c heme lyase OS=Saccharomyces cerevisiae (strain ATCC 204508 / S288c) GN=CYC3 PE=1 SV=1	1	1	1	1	1	1	1	1	1	1	3	3	3	30.081	269	269	0.00090416	1.0988	0.99564	8.4698	2	0	Median	NaN	NaN	NaN	1	0	Median	NaN	NaN	NaN	1	0	Median	3	3	73052000	35194000	37857000	35388000	18867000
P06208;P06208-2;Q12166	P06208;P06208-2	17;16;8	17;16;8	17;16;8	2-isopropylmalate synthase	LEU4	>sp|P06208|LEU1_YEAST 2-isopropylmalate synthase OS=Saccharomyces cerevisiae (strain ATCC 204508 / S288c) GN=LEU4 PE=1 SV=1;>sp|P06208-2|LEU1_YEAST Isoform Cytoplasmic of 2-isopropylmalate synthase OS=Saccharomyces cerevisiae (strain ATCC 204508 / S288c) G	3	17	17	17	13	16	13	16	13	16	25.5	25.5	25.5	68.408	619	619;589;604	0	0.98398	1.0233	30.335	33	0	Median	1.0151	1.1312	21.04	16	0	Median	0.90973	0.76491	29.883	17	0	Median	19.9	23.7	3174400000	1586700000	1587700000	1666000000	849300000
P06634;P24784	P06634	14;3	14;3	13;2	ATP-dependent RNA helicase DED1	DED1	>sp|P06634|DED1_YEAST ATP-dependent RNA helicase DED1 OS=Saccharomyces cerevisiae (strain ATCC 204508 / S288c) GN=DED1 PE=1 SV=2	2	14	14	13	14	11	14	11	13	10	29.3	29.3	27.5	65.552	604	604;617	0	1.1571	1.088	20.211	21	0	Median	0.90323	1.0279	24.423	11	0	Median	1.2617	1.0908	15.602	10	0	Median	29.3	23.5	1593300000	748890000	844420000	934440000	473630000
P06738	P06738	20	20	20	Glycogen phosphorylase	GPH1	>sp|P06738|PHSG_YEAST Glycogen phosphorylase OS=Saccharomyces cerevisiae (strain ATCC 204508 / S288c) GN=GPH1 PE=1 SV=4	1	20	20	20	11	19	11	19	11	19	23.5	23.5	23.5	103.27	902	902	0	1.0149	1.0443	35.883	31	0	Median	0.79944	0.92281	31.902	13	0	Median	1.256	1.0821	38.885	18	0	Median	14.2	22.3	3413800000	1665700000	1748000000	1520800000	823100000
P06774	P06774	2	2	2	Transcriptional activator HAP2	HAP2	>sp|P06774|HAP2_YEAST Transcriptional activator HAP2 OS=Saccharomyces cerevisiae (strain ATCC 204508 / S288c) GN=HAP2 PE=1 SV=1	1	2	2	2	1	2	1	2	1	2	14.3	14.3	14.3	29.867	265	265	0	1.2618	1.1814	34.769	3	1	Plateau	NaN	NaN	NaN	1	0	Median	0.98845	0.8403	15.572	2	1	Median	7.2	14.3	228270000	111810000	116460000	117480000	50487000
P06782	P06782	1	1	1	Carbon catabolite-derepressing protein kinase	SNF1	>sp|P06782|SNF1_YEAST Carbon catabolite-derepressing protein kinase OS=Saccharomyces cerevisiae (strain ATCC 204508 / S288c) GN=SNF1 PE=1 SV=1	1	1	1	1	1	1	1	1	1	1	2.5	2.5	2.5	72.045	633	633	0.00090334	NaN	NaN	NaN	1	1	Median	NaN	NaN	NaN	1	1	Median	NaN	NaN	NaN	0	0	Median	2.5	2.5	28034000	11352000	16682000	28034000	11352000
P07143	P07143	5	5	5	Cytochrome c1, heme protein, mitochondrial	CYT1	>sp|P07143|CY1_YEAST Cytochrome c1, heme protein, mitochondrial OS=Saccharomyces cerevisiae (strain ATCC 204508 / S288c) GN=CYT1 PE=1 SV=1	1	5	5	5	5	5	5	5	5	5	27.8	27.8	27.8	34.054	309	309	0	1.077	0.97883	20.871	14	0	Median	0.81008	0.87466	25.458	7	0	Median	1.2395	1.0095	17.057	7	0	Median	27.8	27.8	2670200000	1296000000	1374100000	1252800000	646470000
P07149	P07149	29	29	29	Fatty acid synthase subunit beta;3-hydroxyacyl-[acyl-carrier-protein] dehydratase;Enoyl-[acyl-carrier-protein] reductase [NADH];[Acyl-carrier-protein] acetyltransferase;[Acyl-carrier-protein] malonyltransferase;S-acyl fatty acid synthase thioesterase	FAS1	>sp|P07149|FAS1_YEAST Fatty acid synthase subunit beta OS=Saccharomyces cerevisiae (strain ATCC 204508 / S288c) GN=FAS1 PE=1 SV=2	1	29	29	29	23	21	23	21	23	21	15.4	15.4	15.4	228.69	2051	2051	0	0.92237	0.94942	32.215	38	0	Median	0.89481	1.0064	32.161	20	0	Median	1.0264	0.86836	29.953	18	0	Median	12.9	11.5	3740400000	1877700000	1862800000	1646200000	872990000
P07170	P07170	8	8	8	Adenylate kinase	ADK1	>sp|P07170|KAD2_YEAST Adenylate kinase OS=Saccharomyces cerevisiae (strain ATCC 204508 / S288c) GN=ADK1 PE=1 SV=2	1	8	8	8	7	7	7	7	7	7	34.7	34.7	34.7	24.254	222	222	0	1.0375	1.002	49.15	13	0	Median	1.0433	1.1302	41.685	7	0	Median	0.94985	0.80162	43.848	6	0	Median	34.2	29.7	1535900000	778860000	757040000	827360000	420940000
P07172	P07172	2	2	2	Histidinol-phosphate aminotransferase	HIS5	>sp|P07172|HIS8_YEAST Histidinol-phosphate aminotransferase OS=Saccharomyces cerevisiae (strain ATCC 204508 / S288c) GN=HIS5 PE=1 SV=2	1	2	2	2	1	2	1	2	1	2	8.6	8.6	8.6	42.646	385	385	0	0.84444	0.90151	15.423	3	0	Median	NaN	NaN	NaN	1	0	Median	1.0113	0.85441	21.366	2	0	Median	2.1	8.6	222270000	117110000	105160000	86766000	49241000
P07213	P07213	9	9	9	Mitochondrial import receptor subunit TOM70	TOM70	>sp|P07213|TOM70_YEAST Mitochondrial import receptor subunit TOM70 OS=Saccharomyces cerevisiae (strain ATCC 204508 / S288c) GN=TOM70 PE=1 SV=2	1	9	9	9	6	9	6	9	6	9	15.1	15.1	15.1	70.122	617	617	0	1.0115	0.93152	29.931	17	0	Median	1.0347	1.1825	18.31	8	0	Median	0.91357	0.75805	23.693	9	0	Median	11.7	15.1	1909400000	938490000	970960000	954640000	443940000
P07244	P07244	16	16	16	Bifunctional purine biosynthetic protein ADE5,7;Phosphoribosylamine--glycine ligase;Phosphoribosylformylglycinamidine cyclo-ligase	ADE5,7	>sp|P07244|PUR2_YEAST Bifunctional purine biosynthetic protein ADE5,7 OS=Saccharomyces cerevisiae (strain ATCC 204508 / S288c) GN=ADE5,7 PE=1 SV=1	1	16	16	16	15	16	15	16	15	16	25.8	25.8	25.8	86.067	802	802	0	1.0324	1.0442	19.246	28	0	Median	0.91452	0.9965	21.189	15	0	Median	1.2856	1.0729	17.039	13	0	Median	24.7	25.8	3281700000	1619100000	1662600000	1480900000	784030000
P07245	P07245	20	20	19	C-1-tetrahydrofolate synthase, cytoplasmic;Methylenetetrahydrofolate dehydrogenase;Methenyltetrahydrofolate cyclohydrolase;Formyltetrahydrofolate synthetase	ADE3	>sp|P07245|C1TC_YEAST C-1-tetrahydrofolate synthase, cytoplasmic OS=Saccharomyces cerevisiae (strain ATCC 204508 / S288c) GN=ADE3 PE=1 SV=1	1	20	20	19	14	17	14	17	13	16	28.9	28.9	28.1	102.2	946	946	0	1.0342	0.88326	34.177	28	0	Median	0.8793	1.0145	37.275	14	0	Median	1.0852	0.87624	29.196	14	0	Median	19.2	23	2436300000	1248500000	1187800000	1120000000	591480000
P07246	P07246	7	6	6	Alcohol dehydrogenase 3, mitochondrial	ADH3	>sp|P07246|ADH3_YEAST Alcohol dehydrogenase 3, mitochondrial OS=Saccharomyces cerevisiae (strain ATCC 204508 / S288c) GN=ADH3 PE=1 SV=2	1	7	6	6	5	7	4	6	4	6	14.4	12.5	12.5	40.369	375	375	0	0.79548	0.90966	41.401	7	0	Median	0.79548	0.90966	28.844	3	0	Median	0.98359	0.85061	48.075	4	0	Median	9.6	14.4	752820000	419700000	333130000	363600000	229580000
P07251	P07251	36	36	36	ATP synthase subunit alpha, mitochondrial	ATP1	>sp|P07251|ATPA_YEAST ATP synthase subunit alpha, mitochondrial OS=Saccharomyces cerevisiae (strain ATCC 204508 / S288c) GN=ATP1 PE=1 SV=5	1	36	36	36	31	31	31	31	31	31	56.1	56.1	56.1	58.607	545	545	0	1.0398	1.0532	40.957	75	0	Median	1.0317	1.2084	37.001	39	0	Median	1.0749	0.88597	35.77	36	0	Median	54.9	48.1	54717000000	26236000000	28481000000	26855000000	13341000000
P07253	P07253	2	2	2	Cytochrome B pre-mRNA-processing protein 6	CBP6	>sp|P07253|CBP6_YEAST Cytochrome B pre-mRNA-processing protein 6 OS=Saccharomyces cerevisiae (strain ATCC 204508 / S288c) GN=CBP6 PE=1 SV=1	1	2	2	2	1	2	1	2	1	2	14.2	14.2	14.2	18.678	162	162	0.00089286	0.58172	0.5683	14.013	2	2	Median	NaN	NaN	NaN	1	1	Median	NaN	NaN	NaN	1	1	Median	5.6	14.2	42382000	24498000	17884000	19224000	13041000
P07256	P07256	15	15	15	Cytochrome b-c1 complex subunit 1, mitochondrial	COR1	>sp|P07256|QCR1_YEAST Cytochrome b-c1 complex subunit 1, mitochondrial OS=Saccharomyces cerevisiae (strain ATCC 204508 / S288c) GN=COR1 PE=1 SV=1	1	15	15	15	13	13	13	13	13	13	34.8	34.8	34.8	50.227	457	457	0	0.95353	0.9795	21.237	28	0	Median	0.85916	0.97976	17.816	16	0	Median	1.1321	0.945	24.655	12	0	Median	34.4	30.2	15724000000	7792000000	7932200000	8137200000	4182600000
P07257	P07257	24	24	24	Cytochrome b-c1 complex subunit 2, mitochondrial	QCR2	>sp|P07257|QCR2_YEAST Cytochrome b-c1 complex subunit 2, mitochondrial OS=Saccharomyces cerevisiae (strain ATCC 204508 / S288c) GN=QCR2 PE=1 SV=1	1	24	24	24	22	23	22	23	22	23	59.2	59.2	59.2	40.478	368	368	0	1.0441	0.98322	48.34	46	0	Median	1.1432	1.2905	41.518	20	0	Median	0.8427	0.71433	40.319	26	0	Median	54.6	58.2	8528700000	4223600000	4305200000	3954800000	2065100000
P07259	P07259	32	32	31	Protein URA2;Glutamine-dependent carbamoyl-phosphate synthase;Aspartate carbamoyltransferase	URA2	>sp|P07259|PYR1_YEAST Protein URA2 OS=Saccharomyces cerevisiae (strain ATCC 204508 / S288c) GN=URA2 PE=1 SV=5	1	32	32	31	28	29	28	29	27	28	18.5	18.5	18	245.04	2214	2214	0	0.98892	0.97372	22.631	56	0	Median	0.76414	0.85386	20.439	27	0	Median	1.2874	1.0512	23.066	29	0	Median	16	17.4	4232800000	2156500000	2076300000	2268500000	1273700000
P07260	P07260	4	4	4	Eukaryotic translation initiation factor 4E	CDC33	>sp|P07260|IF4E_YEAST Eukaryotic translation initiation factor 4E OS=Saccharomyces cerevisiae (strain ATCC 204508 / S288c) GN=CDC33 PE=1 SV=1	1	4	4	4	4	4	4	4	4	4	16.4	16.4	16.4	24.254	213	213	0	0.89839	0.88798	50.735	6	0	Median	0.72432	0.84208	48.984	3	0	Median	1.1143	0.93639	58.189	3	0	Median	16.4	16.4	296500000	115380000	181120000	147100000	64941000
P07262	P07262	18	18	14	NADP-specific glutamate dehydrogenase 1	GDH1	>sp|P07262|DHE4_YEAST NADP-specific glutamate dehydrogenase 1 OS=Saccharomyces cerevisiae (strain ATCC 204508 / S288c) GN=GDH1 PE=1 SV=2	1	18	18	14	17	17	17	17	14	14	38.8	38.8	31.5	49.569	454	454	0	1.1012	1.0946	37.829	47	0	Median	0.94918	1.0876	30.521	23	0	Median	1.3288	1.1214	41.981	24	0	Median	38.1	38.8	7980300000	3650800000	4329500000	3725700000	1873300000
P07263-2;P07263	P07263-2;P07263	2;2	2;2	2;2	Histidine--tRNA ligase, mitochondrial	HTS1	>sp|P07263-2|SYH_YEAST Isoform Cytoplasmic of Histidine--tRNA ligase, mitochondrial OS=Saccharomyces cerevisiae (strain ATCC 204508 / S288c) GN=HTS1;>sp|P07263|SYH_YEAST Histidine--tRNA ligase, mitochondrial OS=Saccharomyces cerevisiae (strain ATCC 204508	2	2	2	2	2	2	2	2	2	2	4	4	4	57.75	526	526;546	0	0.88046	0.82195	17.119	4	0	Median	0.72028	0.81428	28.874	2	0	Median	0.95632	0.82195	6.6738	2	0	Median	4	4	126110000	67808000	58303000	75053000	41982000
P07264	P07264	31	31	31	3-isopropylmalate dehydratase	LEU1	>sp|P07264|LEUC_YEAST 3-isopropylmalate dehydratase OS=Saccharomyces cerevisiae (strain ATCC 204508 / S288c) GN=LEU1 PE=1 SV=3	1	31	31	31	25	27	25	27	25	27	37.1	37.1	37.1	85.793	779	779	0	0.97932	0.97505	35.812	56	0	Median	0.90812	1.0065	32.204	26	0	Median	1.0216	0.8752	38.06	30	0	Median	33	33.1	9354100000	4485400000	4868700000	4682400000	2218100000
P07267	P07267	5	5	5	Saccharopepsin	PEP4	>sp|P07267|CARP_YEAST Saccharopepsin OS=Saccharomyces cerevisiae (strain ATCC 204508 / S288c) GN=PEP4 PE=1 SV=1	1	5	5	5	4	3	4	3	4	3	11.1	11.1	11.1	44.498	405	405	0	1.3493	1.1201	31.698	6	0	Median	0.71056	0.80385	43.254	3	0	Median	1.4346	1.2394	17.872	3	0	Median	8.6	9.1	271200000	133570000	137630000	153190000	80678000
P07274	P07274	1	1	1	Profilin	PFY1	>sp|P07274|PROF_YEAST Profilin OS=Saccharomyces cerevisiae (strain ATCC 204508 / S288c) GN=PFY1 PE=1 SV=2	1	1	1	1	1	1	1	1	1	1	11.1	11.1	11.1	13.677	126	126	0	1.0344	0.97099	24.7	2	0	Median	NaN	NaN	NaN	1	0	Median	NaN	NaN	NaN	1	0	Median	11.1	11.1	153220000	76659000	76564000	81714000	48069000
P07275	P07275	6	6	6	Delta-1-pyrroline-5-carboxylate dehydrogenase, mitochondrial	PUT2	>sp|P07275|PUT2_YEAST Delta-1-pyrroline-5-carboxylate dehydrogenase, mitochondrial OS=Saccharomyces cerevisiae (strain ATCC 204508 / S288c) GN=PUT2 PE=1 SV=2	1	6	6	6	6	5	6	5	6	5	8.9	8.9	8.9	64.434	575	575	0	0.87608	0.97831	35.727	7	0	Median	0.7122	0.81887	16.852	3	0	Median	1.2973	1.064	48.566	4	0	Median	8.9	8.5	460320000	224850000	235470000	313710000	152220000
P07277	P07277	1	1	1	Mevalonate kinase	ERG12	>sp|P07277|KIME_YEAST Mevalonate kinase OS=Saccharomyces cerevisiae (strain ATCC 204508 / S288c) GN=ERG12 PE=1 SV=1	1	1	1	1	1	1	1	1	1	1	2.3	2.3	2.3	48.459	443	443	0	0.96858	0.93882	0.70743	2	0	Median	NaN	NaN	NaN	1	0	Median	NaN	NaN	NaN	1	0	Median	2.3	2.3	25515000	12517000	12998000	12139000	6457100
P07278	P07278	7	7	7	cAMP-dependent protein kinase regulatory subunit	BCY1	>sp|P07278|KAPR_YEAST cAMP-dependent protein kinase regulatory subunit OS=Saccharomyces cerevisiae (strain ATCC 204508 / S288c) GN=BCY1 PE=1 SV=4	1	7	7	7	5	5	5	5	5	5	19.7	19.7	19.7	47.218	416	416	0	1.0214	0.99972	36.636	10	0	Median	0.93838	1.0709	48.524	5	0	Median	1.1873	0.93329	22.546	5	0	Median	11.8	13.9	652110000	305990000	346120000	299450000	152580000
P07281;P07280	P07281;P07280	13;13	13;13	13;13	40S ribosomal protein S19-B;40S ribosomal protein S19-A	RPS19B;RPS19A	>sp|P07281|RS19B_YEAST 40S ribosomal protein S19-B OS=Saccharomyces cerevisiae (strain ATCC 204508 / S288c) GN=RPS19B PE=1 SV=2;>sp|P07280|RS19A_YEAST 40S ribosomal protein S19-A OS=Saccharomyces cerevisiae (strain ATCC 204508 / S288c) GN=RPS19A PE=1 SV=2	2	13	13	13	13	13	13	13	13	13	72.2	72.2	72.2	15.891	144	144;144	0	1.0504	1.0158	35.064	30	0	Median	0.88522	1.0325	33.709	15	0	Median	1.1947	1.0054	32.356	15	0	Median	72.2	72.2	54482000000	23894000000	30588000000	26463000000	12959000000
P07283	P07283	13	13	13	Phosphomannomutase	SEC53	>sp|P07283|PMM_YEAST Phosphomannomutase OS=Saccharomyces cerevisiae (strain ATCC 204508 / S288c) GN=SEC53 PE=1 SV=1	1	13	13	13	12	12	12	12	12	12	51.2	51.2	51.2	29.063	254	254	0	1.0235	0.98247	24.788	24	0	Median	0.80234	0.91465	25.078	12	0	Median	1.2159	1.0419	25.458	12	0	Median	50.4	48.4	2171800000	1113500000	1058200000	1147100000	610850000
P07284	P07284	10	10	10	Serine--tRNA ligase, cytoplasmic	SES1	>sp|P07284|SYSC_YEAST Serine--tRNA ligase, cytoplasmic OS=Saccharomyces cerevisiae (strain ATCC 204508 / S288c) GN=SES1 PE=1 SV=2	1	10	10	10	5	9	5	9	5	9	29.9	29.9	29.9	53.309	462	462	0	0.90856	1.0157	38.669	11	0	Median	1.1012	1.2744	34.701	5	0	Median	0.89279	0.78842	40.123	6	0	Median	17.3	24.9	1329900000	649770000	680160000	631830000	325280000
P07285	P07285	1	1	1	Anthranilate phosphoribosyltransferase	TRP4	>sp|P07285|TRPD_YEAST Anthranilate phosphoribosyltransferase OS=Saccharomyces cerevisiae (strain ATCC 204508 / S288c) GN=TRP4 PE=1 SV=1	1	1	1	1	0	1	0	1	0	1	3.2	3.2	3.2	41.374	380	380	0	NaN	NaN	NaN	1	0	Median	NaN	NaN	NaN	0	0	Median	NaN	NaN	NaN	1	0	Median	0	3.2	8054400	3409500	4644900	0	0
P07342	P07342	14	14	14	Acetolactate synthase catalytic subunit, mitochondrial	ILV2	>sp|P07342|ILVB_YEAST Acetolactate synthase catalytic subunit, mitochondrial OS=Saccharomyces cerevisiae (strain ATCC 204508 / S288c) GN=ILV2 PE=1 SV=1	1	14	14	14	13	13	13	13	13	13	23.7	23.7	23.7	74.936	687	687	0	0.97475	1.0121	24.02	27	0	Median	0.81685	0.9416	25.165	14	0	Median	1.2941	1.0514	22.773	13	0	Median	21.7	22.1	3925400000	2172500000	1752900000	1743700000	919540000
P07560;Q99260	P07560;Q99260	2;1	2;1	2;1	Ras-related protein SEC4;GTP-binding protein YPT6	SEC4;YPT6	>sp|P07560|SEC4_YEAST Ras-related protein SEC4 OS=Saccharomyces cerevisiae (strain ATCC 204508 / S288c) GN=SEC4 PE=1 SV=1;>sp|Q99260|YPT6_YEAST GTP-binding protein YPT6 OS=Saccharomyces cerevisiae (strain ATCC 204508 / S288c) GN=YPT6 PE=1 SV=1	2	2	2	2	2	2	2	2	2	2	10.7	10.7	10.7	23.505	215	215;215	0	1.145	1.1392	26.585	4	0	Median	0.75438	0.86832	27.072	2	0	Median	1.4716	1.2589	2.7938	2	0	Median	10.7	10.7	231070000	108540000	122530000	105180000	62278000
P07702	P07702	3	3	3	L-aminoadipate-semialdehyde dehydrogenase	LYS2	>sp|P07702|LYS2_YEAST L-aminoadipate-semialdehyde dehydrogenase OS=Saccharomyces cerevisiae (strain ATCC 204508 / S288c) GN=LYS2 PE=1 SV=2	1	3	3	3	1	3	1	3	1	3	1.9	1.9	1.9	155.34	1392	1392	0	1.6176	1.3671	18.09	4	0	Median	NaN	NaN	NaN	1	0	Median	1.6199	1.4346	16.331	3	0	Median	0.6	1.9	383180000	130610000	252570000	34679000	16153000
P07703	P07703	26	26	26	DNA-directed RNA polymerases I and III subunit RPAC1	RPC40	>sp|P07703|RPAC1_YEAST DNA-directed RNA polymerases I and III subunit RPAC1 OS=Saccharomyces cerevisiae (strain ATCC 204508 / S288c) GN=RPC40 PE=1 SV=1	1	26	26	26	24	25	24	25	24	25	66.9	66.9	66.9	37.686	335	335	0	1.0399	1.0189	65.736	50	0	Median	1.3497	1.558	43.793	25	0	Median	0.74767	0.63897	42.668	25	0	Median	66	66	27697000000	13102000000	14595000000	13846000000	5657700000
P07806-2;P07806	P07806-2;P07806	12;12	12;12	12;12	Valine--tRNA ligase, mitochondrial	VAS1	>sp|P07806-2|SYV_YEAST Isoform Cytoplasmic of Valine--tRNA ligase, mitochondrial OS=Saccharomyces cerevisiae (strain ATCC 204508 / S288c) GN=VAS1;>sp|P07806|SYV_YEAST Valine--tRNA ligase, mitochondrial OS=Saccharomyces cerevisiae (strain ATCC 204508 / S288	2	12	12	12	8	10	8	10	8	10	13.3	13.3	13.3	120.12	1058	1058;1104	0	1.0231	0.96038	29.456	19	0	Median	0.71661	0.81974	32.528	7	0	Median	1.1988	0.99949	19.263	12	0	Median	8.4	11.1	1318200000	668900000	649260000	551470000	329070000
P07991	P07991	10	10	10	Ornithine aminotransferase	CAR2	>sp|P07991|OAT_YEAST Ornithine aminotransferase OS=Saccharomyces cerevisiae (strain ATCC 204508 / S288c) GN=CAR2 PE=1 SV=2	1	10	10	10	9	9	9	9	9	9	33.7	33.7	33.7	46.085	424	424	0	0.91234	0.93263	33.058	14	0	Median	0.87231	1.0083	22.984	6	0	Median	1.0093	0.86149	35.178	8	0	Median	29.5	27.6	2923600000	1479800000	1443800000	1413900000	770730000
P08067	P08067	4	4	4	Cytochrome b-c1 complex subunit Rieske, mitochondrial	RIP1	>sp|P08067|UCRI_YEAST Cytochrome b-c1 complex subunit Rieske, mitochondrial OS=Saccharomyces cerevisiae (strain ATCC 204508 / S288c) GN=RIP1 PE=1 SV=1	1	4	4	4	3	4	3	4	3	4	28.8	28.8	28.8	23.365	215	215	0	0.76374	0.75157	101.91	4	0	Median	1.605	1.8537	52.665	3	1	Plateau	0.38841	0.33154	63.768	6	4	Median	20.5	28.8	703530000	380580000	322950000	365140000	156530000
P08417	P08417	8	8	8	Fumarate hydratase, mitochondrial	FUM1	>sp|P08417|FUMH_YEAST Fumarate hydratase, mitochondrial OS=Saccharomyces cerevisiae (strain ATCC 204508 / S288c) GN=FUM1 PE=1 SV=2	1	8	8	8	8	8	8	8	8	8	18.4	18.4	18.4	53.151	488	488	0	1.0963	1.0251	18.735	14	0	Median	0.80905	0.9111	16.621	7	0	Median	1.374	1.1385	12.413	7	0	Median	18.4	18.4	2787000000	1341900000	1445200000	1323700000	717190000
P08456	P08456	1	1	1	CDP-diacylglycerol--serine O-phosphatidyltransferase	CHO1	>sp|P08456|PSS_YEAST CDP-diacylglycerol--serine O-phosphatidyltransferase OS=Saccharomyces cerevisiae (strain ATCC 204508 / S288c) GN=CHO1 PE=1 SV=3	1	1	1	1	0	1	0	1	0	1	6.2	6.2	6.2	30.804	276	276	0	NaN	NaN	NaN	1	0	Median	NaN	NaN	NaN	0	0	Median	NaN	NaN	NaN	1	0	Median	0	6.2	39317000	15690000	23627000	0	0
P08518	P08518	4	4	4	DNA-directed RNA polymerase II subunit RPB2	RPB2	>sp|P08518|RPB2_YEAST DNA-directed RNA polymerase II subunit RPB2 OS=Saccharomyces cerevisiae (strain ATCC 204508 / S288c) GN=RPB2 PE=1 SV=2	1	4	4	4	4	3	4	3	4	3	3.3	3.3	3.3	138.75	1224	1224	0	1.0026	1.0396	11.761	5	0	Median	0.95548	1.0396	4.6792	3	0	Median	1.1058	0.83421	196.17	3	1	Median	3.3	2.6	514490000	356200000	158290000	334960000	259200000
P08524	P08524	13	13	13	Farnesyl pyrophosphate synthase	ERG20	>sp|P08524|FPPS_YEAST Farnesyl pyrophosphate synthase OS=Saccharomyces cerevisiae (strain ATCC 204508 / S288c) GN=ERG20 PE=1 SV=2	1	13	13	13	13	11	13	11	13	11	32.4	32.4	32.4	40.483	352	352	0	0.95073	0.95517	27.751	26	0	Median	0.84386	0.95517	24.804	14	0	Median	1.096	0.93911	31.601	12	0	Median	32.4	27.3	3876300000	2072200000	1804200000	2157600000	1311900000
P08525	P08525	3	3	3	Cytochrome b-c1 complex subunit 8	QCR8	>sp|P08525|QCR8_YEAST Cytochrome b-c1 complex subunit 8 OS=Saccharomyces cerevisiae (strain ATCC 204508 / S288c) GN=QCR8 PE=1 SV=2	1	3	3	3	3	1	3	1	3	1	35.1	35.1	35.1	10.974	94	94	0	1.1706	1.0954	39.164	5	0	Median	1.2502	1.4259	40.353	4	0	Median	NaN	NaN	NaN	1	0	Median	35.1	12.8	226650000	108780000	117870000	141000000	69965000
P08536	P08536	1	1	1	Sulfate adenylyltransferase	MET3	>sp|P08536|MET3_YEAST Sulfate adenylyltransferase OS=Saccharomyces cerevisiae (strain ATCC 204508 / S288c) GN=MET3 PE=1 SV=2	1	1	1	1	1	1	1	1	1	1	2	2	2	57.724	511	511	0.0017406	0.7959	0.77492	12.684	2	0	Median	NaN	NaN	NaN	1	0	Median	NaN	NaN	NaN	1	0	Median	2	2	137310000	67779000	69531000	71926000	42486000
P08566	P08566	21	21	21	Pentafunctional AROM polypeptide;3-dehydroquinate synthase;3-phosphoshikimate 1-carboxyvinyltransferase;Shikimate kinase;3-dehydroquinate dehydratase;Shikimate dehydrogenase	ARO1	>sp|P08566|ARO1_YEAST Pentafunctional AROM polypeptide OS=Saccharomyces cerevisiae (strain ATCC 204508 / S288c) GN=ARO1 PE=1 SV=1	1	21	21	21	17	20	17	20	17	20	17.3	17.3	17.3	174.75	1588	1588	0	1.0006	0.96489	29.625	30	0	Median	0.85045	0.93045	23.492	14	0	Median	1.1604	0.9934	34.82	16	0	Median	14.4	16.1	2554900000	1245900000	1309000000	1226100000	646410000
P08679	P08679	7	7	7	Citrate synthase, peroxisomal	CIT2	>sp|P08679|CISY2_YEAST Citrate synthase, peroxisomal OS=Saccharomyces cerevisiae (strain ATCC 204508 / S288c) GN=CIT2 PE=1 SV=1	1	7	7	7	7	7	7	7	7	7	19.1	19.1	19.1	51.413	460	460	0	1.1577	1.0536	16.619	14	0	Median	1.0856	1.2105	14.068	7	0	Median	1.2063	0.98841	6.787	7	0	Median	19.1	19.1	1288100000	589910000	698170000	727950000	342100000
P09032	P09032	1	1	1	Translation initiation factor eIF-2B subunit gamma	GCD1	>sp|P09032|EI2BG_YEAST Translation initiation factor eIF-2B subunit gamma OS=Saccharomyces cerevisiae (strain ATCC 204508 / S288c) GN=GCD1 PE=1 SV=3	1	1	1	1	1	0	1	0	1	0	1.7	1.7	1.7	65.699	578	578	0	NaN	NaN	NaN	1	1	Median	NaN	NaN	NaN	1	1	Median	NaN	NaN	NaN	0	0	Median	1.7	0	31539000	12670000	18869000	31539000	12670000
P09064	P09064	4	4	4	Eukaryotic translation initiation factor 2 subunit beta	SUI3	>sp|P09064|IF2B_YEAST Eukaryotic translation initiation factor 2 subunit beta OS=Saccharomyces cerevisiae (strain ATCC 204508 / S288c) GN=SUI3 PE=1 SV=2	1	4	4	4	3	4	3	4	3	4	15.1	15.1	15.1	31.574	285	285	0	1.409	1.1783	38.758	3	0	Median	0.5292	0.5576	15.385	3	2	Median	1.5847	1.3151	107.64	4	2	Median	12.3	15.1	410500000	165660000	244840000	180540000	95586000
P09201	P09201	7	7	7	Fructose-1,6-bisphosphatase	FBP1	>sp|P09201|F16P_YEAST Fructose-1,6-bisphosphatase OS=Saccharomyces cerevisiae (strain ATCC 204508 / S288c) GN=FBP1 PE=1 SV=2	1	7	7	7	7	7	7	7	7	7	21.6	21.6	21.6	38.262	348	348	0	0.75865	0.73708	61.09	17	0	Median	1.4093	1.6253	56.567	7	0	Median	0.72321	0.62543	41.695	10	0	Median	21.6	21.6	1508000000	788380000	719620000	660080000	321350000
P09232	P09232	10	10	10	Cerevisin	PRB1	>sp|P09232|PRTB_YEAST Cerevisin OS=Saccharomyces cerevisiae (strain ATCC 204508 / S288c) GN=PRB1 PE=1 SV=1	1	10	10	10	10	8	10	8	10	8	15.1	15.1	15.1	69.621	635	635	0	1.0317	1.0182	35.838	16	0	Median	0.81531	0.90678	42.888	9	0	Median	1.2295	1.1001	26.393	7	0	Median	15.1	14.2	5399300000	2422400000	2976900000	2917400000	1356200000
P09368	P09368	1	1	1	Proline dehydrogenase, mitochondrial	PUT1	>sp|P09368|PUT1_YEAST Proline dehydrogenase, mitochondrial OS=Saccharomyces cerevisiae (strain ATCC 204508 / S288c) GN=PUT1 PE=1 SV=2	1	1	1	1	1	1	1	1	1	1	1.9	1.9	1.9	53.271	476	476	0	0.92266	0.93102	17.099	2	0	Median	NaN	NaN	NaN	1	0	Median	NaN	NaN	NaN	1	0	Median	1.9	1.9	66041000	34662000	31379000	31554000	18483000
P09436	P09436	7	7	7	Isoleucine--tRNA ligase, cytoplasmic	ILS1	>sp|P09436|SYIC_YEAST Isoleucine--tRNA ligase, cytoplasmic OS=Saccharomyces cerevisiae (strain ATCC 204508 / S288c) GN=ILS1 PE=1 SV=1	1	7	7	7	6	5	6	5	6	5	6.7	6.7	6.7	122.98	1072	1072	0	0.89186	0.87817	33.271	8	0	Median	0.80922	0.87817	16.649	4	0	Median	1.1576	0.99476	47.653	4	0	Median	5.7	4.6	561020000	285180000	275840000	301170000	170060000
P09440	P09440	14	13	13	C-1-tetrahydrofolate synthase, mitochondrial;Methylenetetrahydrofolate dehydrogenase;Methenyltetrahydrofolate cyclohydrolase;Formyltetrahydrofolate synthetase	MIS1	>sp|P09440|C1TM_YEAST C-1-tetrahydrofolate synthase, mitochondrial OS=Saccharomyces cerevisiae (strain ATCC 204508 / S288c) GN=MIS1 PE=1 SV=1	1	14	13	13	13	10	12	9	12	9	15.3	14.6	14.6	106.22	975	975	0	0.95406	0.99718	43.264	21	0	Median	0.94916	1.0388	39.486	12	0	Median	1.1029	0.98304	46.075	9	0	Median	13.7	10.4	2409900000	1284000000	1126000000	1359700000	753420000
P09457	P09457	7	7	7	ATP synthase subunit 5, mitochondrial	ATP5	>sp|P09457|ATPO_YEAST ATP synthase subunit 5, mitochondrial OS=Saccharomyces cerevisiae (strain ATCC 204508 / S288c) GN=ATP5 PE=1 SV=1	1	7	7	7	6	6	6	6	6	6	43.9	43.9	43.9	22.814	212	212	0	0.86391	0.93745	25.305	12	0	Median	0.97828	1.0787	23.709	6	0	Median	0.86391	0.74694	17.645	6	0	Median	38.7	37.7	467360000	233160000	234200000	229980000	116870000
P09624	P09624	13	13	13	Dihydrolipoyl dehydrogenase, mitochondrial	LPD1	>sp|P09624|DLDH_YEAST Dihydrolipoyl dehydrogenase, mitochondrial OS=Saccharomyces cerevisiae (strain ATCC 204508 / S288c) GN=LPD1 PE=1 SV=1	1	13	13	13	12	12	12	12	12	12	23	23	23	54.009	499	499	0	0.90083	1.0086	29.03	23	0	Median	0.90083	1.0797	21.898	11	0	Median	1.0422	0.83241	26.868	12	0	Median	21.4	23	2395800000	1200800000	1194900000	1254000000	595820000
P09733	P09733	4	4	3	Tubulin alpha-1 chain	TUB1	>sp|P09733|TBA1_YEAST Tubulin alpha-1 chain OS=Saccharomyces cerevisiae (strain ATCC 204508 / S288c) GN=TUB1 PE=1 SV=2	1	4	4	3	4	3	4	3	3	2	11.4	11.4	8.1	49.799	447	447	0	1.2528	1.1744	24.78	8	0	Median	0.98335	1.1212	24.805	4	0	Median	1.4798	1.1744	28.261	4	0	Median	11.4	8.5	296720000	142750000	153970000	153610000	82051000
P09734	P09734	2	1	1	Tubulin alpha-3 chain	TUB3	>sp|P09734|TBA3_YEAST Tubulin alpha-3 chain OS=Saccharomyces cerevisiae (strain ATCC 204508 / S288c) GN=TUB3 PE=1 SV=1	1	2	1	1	2	2	1	1	1	1	5.4	2	2	49.693	445	445	0.00091241	0.85255	0.98475	15.974	3	2	Median	0.77307	0.8907	14.196	2	2	Median	NaN	NaN	NaN	1	0	Median	5.4	5.4	292400000	148380000	144020000	194190000	105490000
P09880	P09880	1	1	1	tRNA ligase	TRL1	>sp|P09880|TRNL_YEAST tRNA ligase OS=Saccharomyces cerevisiae (strain ATCC 204508 / S288c) GN=TRL1 PE=1 SV=1	1	1	1	1	1	0	1	0	1	0	1.9	1.9	1.9	95.336	827	827	0	NaN	NaN	NaN	1	1	Median	NaN	NaN	NaN	1	1	Median	NaN	NaN	NaN	0	0	Median	1.9	0	9567300	6592000	2975300	9567300	6592000
P09938	P09938	5	5	5	Ribonucleoside-diphosphate reductase small chain 1	RNR2	>sp|P09938|RIR2_YEAST Ribonucleoside-diphosphate reductase small chain 1 OS=Saccharomyces cerevisiae (strain ATCC 204508 / S288c) GN=RNR2 PE=1 SV=2	1	5	5	5	4	4	4	4	4	4	12.5	12.5	12.5	46.147	399	399	0	0.98813	0.99448	39.137	9	0	Median	1.0047	1.1264	38.43	6	0	Median	0.96221	0.77691	17.773	3	0	Median	9.8	11.8	860230000	424390000	435840000	431510000	207840000
P09950	P09950	1	1	1	5-aminolevulinate synthase, mitochondrial	HEM1	>sp|P09950|HEM1_YEAST 5-aminolevulinate synthase, mitochondrial OS=Saccharomyces cerevisiae (strain ATCC 204508 / S288c) GN=HEM1 PE=1 SV=1	1	1	1	1	1	1	1	1	1	1	1.8	1.8	1.8	59.362	548	548	0	0.84331	0.82999	8.74	2	0	Median	NaN	NaN	NaN	1	0	Median	NaN	NaN	NaN	1	0	Median	1.8	1.8	114280000	65500000	48779000	62362000	41599000
Q3E792;P0C0T4	Q3E792;P0C0T4	10;10	10;10	10;10	40S ribosomal protein S25-A;40S ribosomal protein S25-B	RPS25A;RPS25B	>sp|Q3E792|RS25A_YEAST 40S ribosomal protein S25-A OS=Saccharomyces cerevisiae (strain ATCC 204508 / S288c) GN=RPS25A PE=1 SV=1;>sp|P0C0T4|RS25B_YEAST 40S ribosomal protein S25-B OS=Saccharomyces cerevisiae (strain ATCC 204508 / S288c) GN=RPS25B PE=1 SV=1	2	10	10	10	8	9	8	9	8	9	66.7	66.7	66.7	12.039	108	108;108	0	0.9828	0.94756	47.717	22	0	Median	1.0866	1.2717	52.844	11	0	Median	0.95596	0.73711	31.606	11	0	Median	59.3	63.9	8830800000	4708000000	4122800000	3882500000	1865200000
P0C0V8	P0C0V8	12	1	1	40S ribosomal protein S21-A	RPS21A	>sp|P0C0V8|RS21A_YEAST 40S ribosomal protein S21-A OS=Saccharomyces cerevisiae (strain ATCC 204508 / S288c) GN=RPS21A PE=1 SV=1	1	12	1	1	12	11	1	1	1	1	93.1	18.4	18.4	9.7457	87	87	0	1.1026	1.0689	14.775	4	0	Median	1.0632	1.1986	0.74028	2	0	Median	1.1298	0.93109	4.0514	2	0	Median	93.1	86.2	723790000	348460000	375320000	304590000	150770000
Q3E757;P0C0W9	Q3E757;P0C0W9	18;18	18;18	18;18	60S ribosomal protein L11-B;60S ribosomal protein L11-A	RPL11B;RPL11A	>sp|Q3E757|RL11B_YEAST 60S ribosomal protein L11-B OS=Saccharomyces cerevisiae (strain ATCC 204508 / S288c) GN=RPL11B PE=1 SV=3;>sp|P0C0W9|RL11A_YEAST 60S ribosomal protein L11-A OS=Saccharomyces cerevisiae (strain ATCC 204508 / S288c) GN=RPL11A PE=1 SV=2	2	18	18	18	17	18	17	18	17	18	54	54	54	19.749	174	174;174	0	1.023	0.78785	86.612	53	0	Median	1.8363	2.1252	39.497	26	0	Median	0.57298	0.47679	35.29	27	0	Median	54	54	73509000000	33263000000	40246000000	36059000000	14058000000
Q3E7X9;P0C0X0	Q3E7X9;P0C0X0	4;4	4;4	4;4	40S ribosomal protein S28-A;40S ribosomal protein S28-B	RPS28A;RPS28B	>sp|Q3E7X9|RS28A_YEAST 40S ribosomal protein S28-A OS=Saccharomyces cerevisiae (strain ATCC 204508 / S288c) GN=RPS28A PE=1 SV=1;>sp|P0C0X0|RS28B_YEAST 40S ribosomal protein S28-B OS=Saccharomyces cerevisiae (strain ATCC 204508 / S288c) GN=RPS28B PE=1 SV=1	2	4	4	4	3	3	3	3	3	3	68.7	68.7	68.7	7.5917	67	67;67	0	1.3127	1.0895	62.992	6	0	Median	0.76827	0.8699	79.526	3	0	Median	1.5118	1.2293	51.784	3	0	Median	58.2	40.3	2962900000	1431900000	1531000000	1373900000	774420000
P0C155	P0C155	1	1	1	Putative carboxypeptidase YOL153C		>sp|P0C155|CBPS2_YEAST Putative carboxypeptidase YOL153C OS=Saccharomyces cerevisiae (strain ATCC 204508 / S288c) GN=YOL153C PE=5 SV=1	1	1	1	1	1	1	1	1	1	1	1.7	1.7	1.7	65.092	581	581	0	1.129	1.1403	6.4963	2	0	Median	NaN	NaN	NaN	1	0	Median	NaN	NaN	NaN	1	0	Median	1.7	1.7	103600000	51843000	51757000	54807000	30154000
P0C2H7;P0C2H6	P0C2H7;P0C2H6	14;14	14;14	14;14	60S ribosomal protein L27-B;60S ribosomal protein L27-A	RPL27B;RPL27A	>sp|P0C2H7|RL27B_YEAST 60S ribosomal protein L27-B OS=Saccharomyces cerevisiae (strain ATCC 204508 / S288c) GN=RPL27B PE=1 SV=1;>sp|P0C2H6|RL27A_YEAST 60S ribosomal protein L27-A OS=Saccharomyces cerevisiae (strain ATCC 204508 / S288c) GN=RPL27A PE=1 SV=1	2	14	14	14	13	13	13	13	13	13	61.8	61.8	61.8	15.505	136	136;136	0	1.0437	0.92239	35.491	24	0	Median	0.65427	0.76448	35.471	13	0	Median	1.3028	1.1977	32.18	11	0	Median	61.8	61.8	6085700000	2943000000	3142700000	3137700000	1733600000
P0C2H8	P0C2H8	16	16	2	60S ribosomal protein L31-A	RPL31A	>sp|P0C2H8|RL31A_YEAST 60S ribosomal protein L31-A OS=Saccharomyces cerevisiae (strain ATCC 204508 / S288c) GN=RPL31A PE=1 SV=1	1	16	16	2	16	12	16	12	2	1	89.4	89.4	10.6	12.953	113	113	0	1.1153	1.0371	46.394	43	0	Median	0.9065	1.0273	53.272	21	0	Median	1.3506	1.0633	36.061	22	0	Median	89.4	77.9	100660000000	47500000000	53164000000	54222000000	28371000000
P0C2H9	P0C2H9	15	1	1	60S ribosomal protein L31-B	RPL31B	>sp|P0C2H9|RL31B_YEAST 60S ribosomal protein L31-B OS=Saccharomyces cerevisiae (strain ATCC 204508 / S288c) GN=RPL31B PE=1 SV=1	1	15	1	1	15	12	1	1	1	1	86.7	8	8	12.967	113	113	0	0.92119	0.94361	9.2115	8	0	Median	0.7933	0.89425	5.4805	4	0	Median	1.2607	1.0381	9.8749	4	0	Median	86.7	77.9	2568200000	1260700000	1307500000	899270000	493640000
P0CH09;P0CH08;P0CG63	P0CH09;P0CH08	12;12;4	8;8;0	8;8;0	Ubiquitin-60S ribosomal protein L40;Ubiquitin;60S ribosomal protein L40	RPL40B;RPL40A	>sp|P0CH09|RL402_YEAST Ubiquitin-60S ribosomal protein L40 OS=Saccharomyces cerevisiae (strain ATCC 204508 / S288c) GN=RPL40B PE=1 SV=1;>sp|P0CH08|RL401_YEAST Ubiquitin-60S ribosomal protein L40 OS=Saccharomyces cerevisiae (strain ATCC 204508 / S288c) GN=R	3	12	8	8	11	11	8	8	8	8	64.1	28.1	28.1	14.554	128	128;128;381	0	0.99998	0.99028	22.674	32	0	Median	0.90273	1.0366	19.102	16	0	Median	1.1122	0.95596	26.066	16	0	Median	51.6	54.7	8317800000	3873200000	4444600000	4365300000	2178800000
P0CS90;P39987	P0CS90	26;6	26;6	26;6	Heat shock protein SSC1, mitochondrial	SSC1	>sp|P0CS90|HSP77_YEAST Heat shock protein SSC1, mitochondrial OS=Saccharomyces cerevisiae (strain ATCC 204508 / S288c) GN=SSC1 PE=1 SV=1	2	26	26	26	24	24	24	24	24	24	43.1	43.1	43.1	70.627	654	654;644	0	0.9982	1.0006	32.833	46	0	Median	0.90031	0.99072	35.822	27	0	Median	1.1745	1.009	28.118	19	0	Median	41	40.2	14240000000	7359100000	6880700000	7136000000	3687700000
P0CX09;P0CX08	P0CX09;P0CX08	4;4	4;4	4;4	Mannitol dehydrogenase YNR073C;Mannitol dehydrogenase DSF1	DSF1	>sp|P0CX09|YN073_YEAST Mannitol dehydrogenase YNR073C OS=Saccharomyces cerevisiae (strain ATCC 204508 / S288c) GN=YNR073C PE=3 SV=1;>sp|P0CX08|DSF1_YEAST Mannitol dehydrogenase DSF1 OS=Saccharomyces cerevisiae (strain ATCC 204508 / S288c) GN=DSF1 PE=1 SV=1	2	4	4	4	2	4	2	4	2	4	9.4	9.4	9.4	56.47	502	502;502	0	1.3582	1.2646	43.428	5	0	Median	1.0087	1.1303	44.529	2	0	Median	1.3582	1.2646	50.946	3	0	Median	5.4	9.4	290810000	145160000	145640000	117870000	56686000
P0CX24;P0CX23	P0CX24;P0CX23	19;19	19;19	19;19	60S ribosomal protein L20-B;60S ribosomal protein L20-A	RPL20B;RPL20A	>sp|P0CX24|RL20B_YEAST 60S ribosomal protein L20-B OS=Saccharomyces cerevisiae (strain ATCC 204508 / S288c) GN=RPL20B PE=1 SV=1;>sp|P0CX23|RL20A_YEAST 60S ribosomal protein L20-A OS=Saccharomyces cerevisiae (strain ATCC 204508 / S288c) GN=RPL20A PE=1 SV=1	2	19	19	19	19	18	19	18	19	18	85.5	85.5	85.5	20.437	172	172;172	0	1.01	0.91125	55.922	58	0	Median	1.1213	1.3202	54.112	30	0	Median	0.9822	0.83933	47.587	28	0	Median	85.5	84.3	26135000000	12492000000	13643000000	13576000000	6894700000
P0CX26;P0CX25	P0CX26;P0CX25	12;12	12;12	12;12	60S ribosomal protein L43-B;60S ribosomal protein L43-A	RPL43B;RPL43A	>sp|P0CX26|RL43B_YEAST 60S ribosomal protein L43-B OS=Saccharomyces cerevisiae (strain ATCC 204508 / S288c) GN=RPL43B PE=1 SV=1;>sp|P0CX25|RL43A_YEAST 60S ribosomal protein L43-A OS=Saccharomyces cerevisiae (strain ATCC 204508 / S288c) GN=RPL43A PE=1 SV=1	2	12	12	12	12	12	12	12	12	12	79.3	79.3	79.3	10.091	92	92;92	0	1.177	1.0825	52.758	34	0	Median	1.1532	1.3817	51.611	16	0	Median	1.177	0.97997	40.698	18	0	Median	79.3	79.3	41974000000	19747000000	22227000000	22860000000	11013000000
P0CX28;P0CX27	P0CX28;P0CX27	11;11	11;11	11;11	60S ribosomal protein L42-B;60S ribosomal protein L42-A	RPL42B;RPL42A	>sp|P0CX28|RL44B_YEAST 60S ribosomal protein L42-B OS=Saccharomyces cerevisiae (strain ATCC 204508 / S288c) GN=RPL42B PE=1 SV=1;>sp|P0CX27|RL44A_YEAST 60S ribosomal protein L42-A OS=Saccharomyces cerevisiae (strain ATCC 204508 / S288c) GN=RPL42A PE=1 SV=1	2	11	11	11	11	9	11	9	11	9	62.3	62.3	62.3	12.211	106	106;106	0	0.84634	0.97693	80.434	13	0	Median	0.7931	0.90355	97.252	6	0	Median	1.2677	1.0145	71.113	7	0	Median	62.3	62.3	13864000000	7471100000	6392900000	8323800000	4766600000
P0CX30;P0CX29	P0CX30;P0CX29	18;18	18;18	18;18	40S ribosomal protein S23-B;40S ribosomal protein S23-A	RPS23B;RPS23A	>sp|P0CX30|RS23B_YEAST 40S ribosomal protein S23-B OS=Saccharomyces cerevisiae (strain ATCC 204508 / S288c) GN=RPS23B PE=1 SV=1;>sp|P0CX29|RS23A_YEAST 40S ribosomal protein S23-A OS=Saccharomyces cerevisiae (strain ATCC 204508 / S288c) GN=RPS23A PE=1 SV=1	2	18	18	18	17	14	17	14	17	14	71.7	71.7	71.7	16.038	145	145;145	0	1.0315	1.0153	25.231	34	0	Median	0.84385	1.0021	24.966	20	0	Median	1.2521	1.0423	26.552	14	0	Median	71.7	61.4	49146000000	21648000000	27499000000	25533000000	13213000000
P0CX32;P0CX31	P0CX32;P0CX31	19;19	19;19	19;19	40S ribosomal protein S24-B;40S ribosomal protein S24-A	RPS24B;RPS24A	>sp|P0CX32|RS24B_YEAST 40S ribosomal protein S24-B OS=Saccharomyces cerevisiae (strain ATCC 204508 / S288c) GN=RPS24B PE=1 SV=1;>sp|P0CX31|RS24A_YEAST 40S ribosomal protein S24-A OS=Saccharomyces cerevisiae (strain ATCC 204508 / S288c) GN=RPS24A PE=1 SV=1	2	19	19	19	19	17	19	17	19	17	73.3	73.3	73.3	15.329	135	135;135	0	0.95752	0.92718	56.376	39	0	Median	1.0601	1.2079	48.282	20	0	Median	0.89079	0.70344	43.427	19	0	Median	73.3	73.3	29000000000	14124000000	14876000000	15420000000	7274800000
P0CX34;P0CX33	P0CX34;P0CX33	8;8	8;8	8;8	40S ribosomal protein S30-B;40S ribosomal protein S30-A	RPS30B;RPS30A	>sp|P0CX34|RS30B_YEAST 40S ribosomal protein S30-B OS=Saccharomyces cerevisiae (strain ATCC 204508 / S288c) GN=RPS30B PE=1 SV=1;>sp|P0CX33|RS30A_YEAST 40S ribosomal protein S30-A OS=Saccharomyces cerevisiae (strain ATCC 204508 / S288c) GN=RPS30A PE=1 SV=1	2	8	8	8	8	7	8	7	8	7	63.5	63.5	63.5	7.1184	63	63;63	0	1.0681	1.1604	36.723	20	0	Median	0.98543	1.1214	47.91	10	0	Median	1.5068	1.2384	23.206	10	0	Median	63.5	61.9	23506000000	10556000000	12950000000	14220000000	7209600000
P0CX36;P0CX35	P0CX36;P0CX35	19;19	19;19	19;19	40S ribosomal protein S4-B;40S ribosomal protein S4-A	RPS4B;RPS4A	>sp|P0CX36|RS4B_YEAST 40S ribosomal protein S4-B OS=Saccharomyces cerevisiae (strain ATCC 204508 / S288c) GN=RPS4B PE=1 SV=1;>sp|P0CX35|RS4A_YEAST 40S ribosomal protein S4-A OS=Saccharomyces cerevisiae (strain ATCC 204508 / S288c) GN=RPS4A PE=1 SV=1	2	19	19	19	18	14	18	14	18	14	54	54	54	29.41	261	261;261	0	0.96904	1.0115	39.322	32	0	Median	0.94158	1.0683	43.517	17	0	Median	1.2104	1.0074	35.46	15	0	Median	52.9	45.6	14063000000	7129600000	6933900000	7837900000	4339500000
P0CX38;P0CX37	P0CX38;P0CX37	29;29	29;29	29;29	40S ribosomal protein S6-B;40S ribosomal protein S6-A	RPS6B;RPS6A	>sp|P0CX38|RS6B_YEAST 40S ribosomal protein S6-B OS=Saccharomyces cerevisiae (strain ATCC 204508 / S288c) GN=RPS6B PE=1 SV=1;>sp|P0CX37|RS6A_YEAST 40S ribosomal protein S6-A OS=Saccharomyces cerevisiae (strain ATCC 204508 / S288c) GN=RPS6A PE=1 SV=1	2	29	29	29	27	26	27	26	27	26	70.3	70.3	70.3	26.996	236	236;236	0	0.96239	0.94566	46.277	63	0	Median	0.90366	1.0464	47.365	33	0	Median	1.1029	0.93845	43.559	30	0	Median	69.1	69.9	28965000000	14565000000	14400000000	14809000000	8092900000
P0CX40;P0CX39	P0CX40;P0CX39	13;13	13;13	13;13	40S ribosomal protein S8-B;40S ribosomal protein S8-A	RPS8B;RPS8A	>sp|P0CX40|RS8B_YEAST 40S ribosomal protein S8-B OS=Saccharomyces cerevisiae (strain ATCC 204508 / S288c) GN=RPS8B PE=1 SV=1;>sp|P0CX39|RS8A_YEAST 40S ribosomal protein S8-A OS=Saccharomyces cerevisiae (strain ATCC 204508 / S288c) GN=RPS8A PE=1 SV=1	2	13	13	13	13	13	13	13	13	13	55	55	55	22.489	200	200;200	0	1.0181	0.91849	29.315	34	0	Median	0.8476	0.94573	34.147	17	0	Median	1.0238	0.88425	21.089	17	0	Median	55	55	26357000000	12792000000	13565000000	15100000000	7877200000
P0CX42;P0CX41	P0CX42;P0CX41	10;10	10;10	10;10	60S ribosomal protein L23-B;60S ribosomal protein L23-A	RPL23B;RPL23A	>sp|P0CX42|RL23B_YEAST 60S ribosomal protein L23-B OS=Saccharomyces cerevisiae (strain ATCC 204508 / S288c) GN=RPL23B PE=1 SV=1;>sp|P0CX41|RL23A_YEAST 60S ribosomal protein L23-A OS=Saccharomyces cerevisiae (strain ATCC 204508 / S288c) GN=RPL23A PE=1 SV=1	2	10	10	10	9	9	9	9	9	9	61.3	61.3	61.3	14.473	137	137;137	0	1.1577	1.0428	21.749	21	0	Median	0.87934	1.0222	21.481	10	0	Median	1.2684	1.0663	22.4	11	0	Median	60.6	57.7	10239000000	4737400000	5501600000	5380800000	2656900000
P0CX44;P0CX43	P0CX44;P0CX43	16;16	16;16	16;16	60S ribosomal protein L1-B;60S ribosomal protein L1-A	RPL1B;RPL1A	>sp|P0CX44|RL1B_YEAST 60S ribosomal protein L1-B OS=Saccharomyces cerevisiae (strain ATCC 204508 / S288c) GN=RPL1B PE=1 SV=1;>sp|P0CX43|RL1A_YEAST 60S ribosomal protein L1-A OS=Saccharomyces cerevisiae (strain ATCC 204508 / S288c) GN=RPL1A PE=1 SV=1	2	16	16	16	14	13	14	13	14	13	51.6	51.6	51.6	24.485	217	217;217	0	0.98778	0.95371	47.885	27	0	Median	1.0162	1.0824	49.845	16	0	Median	0.95268	0.79494	37.835	11	0	Median	45.2	47	9220100000	4620000000	4600100000	4848900000	2590200000
P0CX46;P0CX45	P0CX46;P0CX45	21;21	21;21	21;21	60S ribosomal protein L2-B;60S ribosomal protein L2-A	RPL2B;RPL2A	>sp|P0CX46|RL2B_YEAST 60S ribosomal protein L2-B OS=Saccharomyces cerevisiae (strain ATCC 204508 / S288c) GN=RPL2B PE=1 SV=1;>sp|P0CX45|RL2A_YEAST 60S ribosomal protein L2-A OS=Saccharomyces cerevisiae (strain ATCC 204508 / S288c) GN=RPL2A PE=1 SV=1	2	21	21	21	19	17	19	17	19	17	66.9	66.9	66.9	27.408	254	254;254	0	1.0409	1.0808	62.885	46	0	Median	1.337	1.4926	54.801	25	0	Median	0.8781	0.69947	52.925	21	0	Median	66.9	62.6	25876000000	12786000000	13090000000	13348000000	6345400000
P0CX48;P0CX47	P0CX48;P0CX47	17;17	17;17	17;17	40S ribosomal protein S11-B;40S ribosomal protein S11-A	RPS11B;RPS11A	>sp|P0CX48|RS11B_YEAST 40S ribosomal protein S11-B OS=Saccharomyces cerevisiae (strain ATCC 204508 / S288c) GN=RPS11B PE=1 SV=1;>sp|P0CX47|RS11A_YEAST 40S ribosomal protein S11-A OS=Saccharomyces cerevisiae (strain ATCC 204508 / S288c) GN=RPS11A PE=1 SV=1	2	17	17	17	15	15	15	15	15	15	79.5	79.5	79.5	17.749	156	156;156	0	1.022	1.0327	33.771	31	0	Median	0.94089	1.0655	31.011	16	0	Median	1.1927	0.96727	33.85	15	0	Median	79.5	78.2	13512000000	6130900000	7380800000	5901100000	2722500000
P0CX50;P0CX49	P0CX50;P0CX49	12;12	12;12	12;12	60S ribosomal protein L18-B;60S ribosomal protein L18-A	RPL18B;RPL18A	>sp|P0CX50|RL18B_YEAST 60S ribosomal protein L18-B OS=Saccharomyces cerevisiae (strain ATCC 204508 / S288c) GN=RPL18B PE=1 SV=1;>sp|P0CX49|RL18A_YEAST 60S ribosomal protein L18-A OS=Saccharomyces cerevisiae (strain ATCC 204508 / S288c) GN=RPL18A PE=1 SV=1	2	12	12	12	11	11	11	11	11	11	47.8	47.8	47.8	20.563	186	186;186	0	0.9669	0.96735	23.639	27	0	Median	0.75797	0.89514	21.827	14	0	Median	1.2938	1.0774	25.63	13	0	Median	42.5	41.4	19009000000	9363500000	9645900000	9242100000	5081000000
P0CX52;P0CX51	P0CX52;P0CX51	14;14	14;14	14;14	40S ribosomal protein S16-B;40S ribosomal protein S16-A	RPS16B;RPS16A	>sp|P0CX52|RS16B_YEAST 40S ribosomal protein S16-B OS=Saccharomyces cerevisiae (strain ATCC 204508 / S288c) GN=RPS16B PE=1 SV=1;>sp|P0CX51|RS16A_YEAST 40S ribosomal protein S16-A OS=Saccharomyces cerevisiae (strain ATCC 204508 / S288c) GN=RPS16A PE=1 SV=1	2	14	14	14	13	14	13	14	13	14	68.5	68.5	68.5	15.847	143	143;143	0	0.95748	0.95416	30.96	32	0	Median	0.90013	1.0345	30.496	16	0	Median	1.0188	0.85576	31.004	16	0	Median	63.6	68.5	11862000000	6045900000	5816500000	5955800000	2815100000
P0CX54;P0CX53	P0CX54;P0CX53	11;11	11;11	11;11	60S ribosomal protein L12-B;60S ribosomal protein L12-A	RPL12B;RPL12A	>sp|P0CX54|RL12B_YEAST 60S ribosomal protein L12-B OS=Saccharomyces cerevisiae (strain ATCC 204508 / S288c) GN=RPL12B PE=1 SV=1;>sp|P0CX53|RL12A_YEAST 60S ribosomal protein L12-A OS=Saccharomyces cerevisiae (strain ATCC 204508 / S288c) GN=RPL12A PE=1 SV=1	2	11	11	11	11	9	11	9	11	9	55.8	55.8	55.8	17.822	165	165;165	0	0.96442	0.90717	41.229	23	0	Median	0.85384	0.97004	42.972	13	0	Median	1.0596	0.84551	29.94	10	0	Median	55.8	46.7	18512000000	9242500000	9269700000	10117000000	5324000000
P0CX56;P0CX55	P0CX56;P0CX55	10;10	10;10	10;10	40S ribosomal protein S18-B;40S ribosomal protein S18-A	RPS18B;RPS18A	>sp|P0CX56|RS18B_YEAST 40S ribosomal protein S18-B OS=Saccharomyces cerevisiae (strain ATCC 204508 / S288c) GN=RPS18B PE=1 SV=1;>sp|P0CX55|RS18A_YEAST 40S ribosomal protein S18-A OS=Saccharomyces cerevisiae (strain ATCC 204508 / S288c) GN=RPS18A PE=1 SV=1	2	10	10	10	10	10	10	10	10	10	63	63	63	17.037	146	146;146	0	0.92418	0.95087	44.482	22	0	Median	0.92905	1.061	38.766	11	0	Median	0.8908	0.80606	31.624	11	0	Median	63	63	15795000000	7475700000	8319100000	7872700000	3895200000
P0CX83;P0CX82	P0CX83;P0CX82	20;20	20;20	20;20	60S ribosomal protein L19-B;60S ribosomal protein L19-A	RPL19B;RPL19A	>sp|P0CX83|RL19B_YEAST 60S ribosomal protein L19-B OS=Saccharomyces cerevisiae (strain ATCC 204508 / S288c) GN=RPL19B PE=1 SV=1;>sp|P0CX82|RL19A_YEAST 60S ribosomal protein L19-A OS=Saccharomyces cerevisiae (strain ATCC 204508 / S288c) GN=RPL19A PE=1 SV=1	2	20	20	20	19	19	19	19	19	19	49.2	49.2	49.2	21.704	189	189;189	0	0.99182	0.96069	66.963	46	0	Median	0.75078	0.82944	90.504	23	0	Median	1.4209	1.1669	31.269	23	0	Median	49.2	49.2	79541000000	36652000000	42889000000	39983000000	22965000000
P0CX85;P0CX84	P0CX85;P0CX84	24;24	24;24	24;24	60S ribosomal protein L35-B;60S ribosomal protein L35-A	RPL35B;RPL35A	>sp|P0CX85|RL35B_YEAST 60S ribosomal protein L35-B OS=Saccharomyces cerevisiae (strain ATCC 204508 / S288c) GN=RPL35B PE=1 SV=1;>sp|P0CX84|RL35A_YEAST 60S ribosomal protein L35-A OS=Saccharomyces cerevisiae (strain ATCC 204508 / S288c) GN=RPL35A PE=1 SV=1	2	24	24	24	22	23	22	23	22	23	83.3	83.3	83.3	13.909	120	120;120	0	1.1528	1.0046	40.927	65	0	Median	0.83365	0.95965	47.113	32	0	Median	1.368	1.0831	34.591	33	0	Median	81.7	82.5	87216000000	40877000000	46340000000	47415000000	24956000000
P10080	P10080	24	24	24	Single-stranded nucleic acid-binding protein	SBP1	>sp|P10080|SSBP1_YEAST Single-stranded nucleic acid-binding protein OS=Saccharomyces cerevisiae (strain ATCC 204508 / S288c) GN=SBP1 PE=1 SV=2	1	24	24	24	22	22	22	22	22	22	60.9	60.9	60.9	32.989	294	294	0	1.2071	1.4032	88.199	54	0	Median	1.821	2.0629	31.838	28	0	Median	0.60798	0.4989	43.281	26	0	Median	59.2	60.9	14600000000	7008000000	7592300000	7265700000	2105400000
P10081	P10081	9	9	9	ATP-dependent RNA helicase eIF4A	TIF1	>sp|P10081|IF4A_YEAST ATP-dependent RNA helicase eIF4A OS=Saccharomyces cerevisiae (strain ATCC 204508 / S288c) GN=TIF1 PE=1 SV=3	1	9	9	9	7	9	7	9	7	9	27.3	27.3	27.3	44.697	395	395	0	0.99697	0.9805	38.371	20	0	Median	1.0401	1.1727	21.837	8	0	Median	0.91483	0.82641	37.154	12	0	Median	21	27.3	4141800000	2093200000	2048700000	1929900000	1006700000
P10127	P10127	3	3	3	Alcohol dehydrogenase 4	ADH4	>sp|P10127|ADH4_YEAST Alcohol dehydrogenase 4 OS=Saccharomyces cerevisiae (strain ATCC 204508 / S288c) GN=ADH4 PE=1 SV=3	1	3	3	3	2	3	2	3	2	3	12.3	12.3	12.3	41.142	382	382	0	1.1902	0.93599	38.101	7	0	Median	0.74749	0.86504	4.7984	3	0	Median	1.4408	1.2197	41.659	4	0	Median	9.7	12.3	165630000	79131000	86503000	58327000	32038000
P10174	P10174	1	1	1	Cytochrome c oxidase subunit 7	COX7	>sp|P10174|COX7_YEAST Cytochrome c oxidase subunit 7 OS=Saccharomyces cerevisiae (strain ATCC 204508 / S288c) GN=COX7 PE=1 SV=3	1	1	1	1	1	1	1	1	1	1	15	15	15	6.9323	60	60	0	0.87706	0.76502	13.544	4	0	Median	0.76575	0.87019	17.924	2	0	Median	0.8832	0.74963	2.5809	2	0	Median	15	15	1349000000	685560000	663470000	638030000	313210000
P10507	P10507	2	2	2	Mitochondrial-processing peptidase subunit beta	MAS1	>sp|P10507|MPPB_YEAST Mitochondrial-processing peptidase subunit beta OS=Saccharomyces cerevisiae (strain ATCC 204508 / S288c) GN=MAS1 PE=1 SV=1	1	2	2	2	2	2	2	2	2	2	5	5	5	51.083	462	462	0	1.3031	1.1587	33.629	4	0	Median	1.192	1.3762	55.175	2	0	Median	1.3031	1.1587	7.2465	2	0	Median	5	5	194360000	95702000	98659000	101480000	52587000
P10591;P09435	P10591	38;10	6;0	6;0	Heat shock protein SSA1	SSA1	>sp|P10591|HSP71_YEAST Heat shock protein SSA1 OS=Saccharomyces cerevisiae (strain ATCC 204508 / S288c) GN=SSA1 PE=1 SV=4	2	38	6	6	37	34	6	5	6	5	54	9.2	9.2	69.656	642	642;649	0	1.1052	1.1115	30.562	17	0	Median	1.1052	1.2538	14.289	9	0	Median	0.98763	0.8351	30.814	8	0	Median	54	43.5	3336500000	1644500000	1692000000	1659300000	809470000
P10592;P22202	P10592	41;12	40;11	9;1	Heat shock protein SSA2	SSA2	>sp|P10592|HSP72_YEAST Heat shock protein SSA2 OS=Saccharomyces cerevisiae (strain ATCC 204508 / S288c) GN=SSA2 PE=1 SV=3	2	41	40	9	40	37	40	36	9	8	59.3	59.3	16	69.469	639	639;642	0	1.0842	1.0065	45.866	88	0	Median	1.1887	1.3305	34.815	47	0	Median	0.8346	0.70156	34.618	41	0	Median	59.3	48.7	25209000000	12232000000	12977000000	13390000000	6290000000
P10614	P10614	2	2	2	Lanosterol 14-alpha demethylase	ERG11	>sp|P10614|CP51_YEAST Lanosterol 14-alpha demethylase OS=Saccharomyces cerevisiae (strain ATCC 204508 / S288c) GN=ERG11 PE=1 SV=1	1	2	2	2	2	1	2	1	2	1	4.2	4.2	4.2	60.719	530	530	0	0.86003	0.95885	7.8095	3	0	Median	0.85235	0.93943	2.8931	2	0	Median	NaN	NaN	NaN	1	0	Median	4.2	2.3	81873000	40223000	41650000	68072000	33528000
P10622	P10622	4	4	4	60S acidic ribosomal protein P1-beta	RPP1B	>sp|P10622|RLA3_YEAST 60S acidic ribosomal protein P1-beta OS=Saccharomyces cerevisiae (strain ATCC 204508 / S288c) GN=RPP1B PE=1 SV=3	1	4	4	4	3	4	3	4	3	4	54.7	54.7	54.7	10.667	106	106	0	0.98607	0.90469	20.789	13	0	Median	0.80746	0.89703	19.686	6	0	Median	1.0948	0.94541	22.15	7	0	Median	54.7	54.7	3718400000	1893000000	1825400000	1892200000	1076300000
P10659	P10659	16	5	5	S-adenosylmethionine synthase 1	SAM1	>sp|P10659|METK1_YEAST S-adenosylmethionine synthase 1 OS=Saccharomyces cerevisiae (strain ATCC 204508 / S288c) GN=SAM1 PE=1 SV=2	1	16	5	5	13	14	4	5	4	5	42.7	13.1	13.1	41.818	382	382	0	0.88853	0.89807	63.366	7	0	Median	1.1829	1.4149	49.973	3	0	Median	0.85169	0.743	41.834	4	0	Median	37.4	33.8	555250000	288680000	266570000	223400000	105660000
P10662	P10662	6	6	6	37S ribosomal protein MRP1, mitochondrial	MRP1	>sp|P10662|RT01_YEAST 37S ribosomal protein MRP1, mitochondrial OS=Saccharomyces cerevisiae (strain ATCC 204508 / S288c) GN=MRP1 PE=1 SV=2	1	6	6	6	5	4	5	4	5	4	22.4	22.4	22.4	36.728	321	321	0	1.0136	1.0971	41.133	9	0	Median	0.95382	1.0994	45.867	5	0	Median	1.2521	1.0926	35.93	4	0	Median	18.4	15.6	382570000	178810000	203760000	215780000	96789000
P10663	P10663	1	1	1	37S ribosomal protein MRP2, mitochondrial	MRP2	>sp|P10663|RT02_YEAST 37S ribosomal protein MRP2, mitochondrial OS=Saccharomyces cerevisiae (strain ATCC 204508 / S288c) GN=MRP2 PE=1 SV=1	1	1	1	1	1	1	1	1	1	1	6.1	6.1	6.1	13.538	115	115	0.0058382	0.73204	0.70315	10.917	2	0	Median	NaN	NaN	NaN	1	0	Median	NaN	NaN	NaN	1	0	Median	6.1	6.1	54839000	31663000	23176000	27998000	17559000
P10664;P49626	P10664;P49626	25;23	25;23	25;23	60S ribosomal protein L4-A;60S ribosomal protein L4-B	RPL4A;RPL4B	>sp|P10664|RL4A_YEAST 60S ribosomal protein L4-A OS=Saccharomyces cerevisiae (strain ATCC 204508 / S288c) GN=RPL4A PE=1 SV=4;>sp|P49626|RL4B_YEAST 60S ribosomal protein L4-B OS=Saccharomyces cerevisiae (strain ATCC 204508 / S288c) GN=RPL4B PE=1 SV=2	2	25	25	25	25	24	25	24	25	24	61.3	61.3	61.3	39.092	362	362;362	0	0.98276	0.98259	46.22	64	0	Median	0.90717	1.0479	46.405	35	0	Median	1.0502	0.88945	41.415	29	0	Median	61.3	58.3	54859000000	26464000000	28395000000	27953000000	14222000000
P10823	P10823	2	2	2	Guanine nucleotide-binding protein alpha-2 subunit	GPA2	>sp|P10823|GPA2_YEAST Guanine nucleotide-binding protein alpha-2 subunit OS=Saccharomyces cerevisiae (strain ATCC 204508 / S288c) GN=GPA2 PE=1 SV=2	1	2	2	2	2	2	2	2	2	2	4.2	4.2	4.2	50.447	449	449	0	0.69136	0.78681	17.524	3	0	Median	0.66709	0.7857	0.19965	2	0	Median	1.3337	1.0958	4.1201	2	1	Median	4.2	4.2	200010000	112350000	87659000	92398000	57092000
P10869	P10869	3	3	3	Aspartokinase	HOM3	>sp|P10869|AK_YEAST Aspartokinase OS=Saccharomyces cerevisiae (strain ATCC 204508 / S288c) GN=HOM3 PE=1 SV=2	1	3	3	3	2	2	2	2	2	2	10.4	10.4	10.4	58.109	527	527	0	1.3724	1.5146	53.443	4	2	Median	1.3724	1.5146	20.32	2	1	Median	1.4701	1.229	87.858	2	1	Median	8.5	4.6	287770000	137370000	150390000	153960000	62956000
P10963	P10963	31	31	31	Phosphoenolpyruvate carboxykinase [ATP]	PCK1	>sp|P10963|PCKA_YEAST Phosphoenolpyruvate carboxykinase [ATP] OS=Saccharomyces cerevisiae (strain ATCC 204508 / S288c) GN=PCK1 PE=1 SV=2	1	31	31	31	30	26	30	26	30	26	62.5	62.5	62.5	60.983	549	549	0	1.0691	1.1279	88.753	65	0	Median	1.3381	1.5405	76.026	33	0	Median	0.92832	0.78014	91.588	32	0	Median	62.5	49.9	28235000000	12831000000	15404000000	14366000000	6291000000
P10964	P10964	88	88	87	DNA-directed RNA polymerase I subunit RPA190	RPA190	>sp|P10964|RPA1_YEAST DNA-directed RNA polymerase I subunit RPA190 OS=Saccharomyces cerevisiae (strain ATCC 204508 / S288c) GN=RPA190 PE=1 SV=2	1	88	88	87	80	79	80	79	79	78	50	50	50	186.43	1664	1664	0	0.99715	0.9786	49.888	193	0	Median	1.0912	1.2351	38.519	96	0	Median	0.81962	0.70839	34.367	97	0	Median	45.4	42.8	60878000000	28954000000	31924000000	27147000000	12391000000
P11076;P19146	P11076;P19146	2;1	2;1	2;1	ADP-ribosylation factor 1;ADP-ribosylation factor 2	ARF1;ARF2	>sp|P11076|ARF1_YEAST ADP-ribosylation factor 1 OS=Saccharomyces cerevisiae (strain ATCC 204508 / S288c) GN=ARF1 PE=1 SV=3;>sp|P19146|ARF2_YEAST ADP-ribosylation factor 2 OS=Saccharomyces cerevisiae (strain ATCC 204508 / S288c) GN=ARF2 PE=1 SV=3	2	2	2	2	2	1	2	1	2	1	18.2	18.2	18.2	20.529	181	181;181	0	1.0536	0.92466	22.863	5	0	Median	0.81855	0.92466	26.15	3	0	Median	1.228	0.99904	26.872	2	0	Median	18.2	4.4	1237300000	619910000	617350000	629170000	364750000
P11154	P11154	102	102	44	Pyruvate carboxylase 1	PYC1	>sp|P11154|PYC1_YEAST Pyruvate carboxylase 1 OS=Saccharomyces cerevisiae (strain ATCC 204508 / S288c) GN=PYC1 PE=1 SV=2	1	102	102	44	98	95	98	95	41	38	60.2	60.2	31.4	130.1	1178	1178	0	1.0174	0.96975	63.052	267	0	Median	1.2215	1.3949	58.629	136	0	Median	0.80129	0.64483	39.916	131	0	Median	58.8	55.1	866430000000	391630000000	474790000000	426170000000	182030000000
P11353	P11353	2	2	2	Coproporphyrinogen-III oxidase	HEM13	>sp|P11353|HEM6_YEAST Oxygen-dependent coproporphyrinogen-III oxidase OS=Saccharomyces cerevisiae (strain ATCC 204508 / S288c) GN=HEM13 PE=1 SV=2	1	2	2	2	2	2	2	2	2	2	5.2	5.2	5.2	37.711	328	328	0	1.0468	1.1753	23.014	5	0	Median	1.0277	1.2566	14.381	3	0	Median	1.0971	0.96971	8.219	3	1	Median	5.2	5.2	776500000	336370000	440130000	434390000	192290000
P11484	P11484	55	55	2	Heat shock protein SSB1	SSB1	>sp|P11484|HSP75_YEAST Heat shock protein SSB1 OS=Saccharomyces cerevisiae (strain ATCC 204508 / S288c) GN=SSB1 PE=1 SV=3	1	55	55	2	51	50	51	50	2	2	68.7	68.7	5.5	66.601	613	613	0	1.0128	0.96067	43.019	137	0	Median	1.0031	1.1567	34.863	68	0	Median	1.0225	0.84447	37.794	69	0	Median	66.2	67.9	64515000000	31787000000	32728000000	31073000000	15695000000
P11491	P11491	2	2	2	Repressible alkaline phosphatase;Soluble alkaline phosphatase	PHO8	>sp|P11491|PPB_YEAST Repressible alkaline phosphatase OS=Saccharomyces cerevisiae (strain ATCC 204508 / S288c) GN=PHO8 PE=1 SV=2	1	2	2	2	2	0	2	0	2	0	5.5	5.5	5.5	63.003	566	566	0	1.2871	1.4641	5.1	2	1	Median	1.2871	1.4641	5.1	2	1	Median	NaN	NaN	NaN	0	0	Median	5.5	0	73226000	34208000	39019000	73226000	34208000
P11632	P11632	6	6	6	Non-histone chromosomal protein 6A	NHP6A	>sp|P11632|NHP6A_YEAST Non-histone chromosomal protein 6A OS=Saccharomyces cerevisiae (strain ATCC 204508 / S288c) GN=NHP6A PE=1 SV=1	1	6	6	6	5	5	5	5	5	5	44.1	44.1	44.1	10.802	93	93	0	0.85036	0.68427	53.029	7	0	Median	1.3054	1.5141	19.368	3	0	Median	0.6529	0.56799	19.667	4	0	Median	44.1	43	2586200000	1317900000	1268300000	1220200000	512790000
P11633	P11633	4	4	4	Non-histone chromosomal protein 6B	NHP6B	>sp|P11633|NHP6B_YEAST Non-histone chromosomal protein 6B OS=Saccharomyces cerevisiae (strain ATCC 204508 / S288c) GN=NHP6B PE=1 SV=3	1	4	4	4	4	4	4	4	4	4	39.4	39.4	39.4	11.476	99	99	0	0.95112	1.0758	67.869	9	0	Median	1.1965	1.3598	37.085	5	0	Median	0.58727	0.48632	25.472	4	0	Median	39.4	39.4	8484900000	4234100000	4250800000	3373800000	1433200000
P11745	P11745	1	1	1	Ran GTPase-activating protein 1	RNA1	>sp|P11745|RNA1_YEAST Ran GTPase-activating protein 1 OS=Saccharomyces cerevisiae (strain ATCC 204508 / S288c) GN=RNA1 PE=1 SV=2	1	1	1	1	1	1	1	1	1	1	4.4	4.4	4.4	45.815	407	407	0	1.0446	0.96437	31.795	2	1	Median	NaN	NaN	NaN	1	0	Median	NaN	NaN	NaN	1	1	Median	4.4	4.4	34849000	17364000	17485000	16592000	9224300
P11792	P11792	1	1	1	Serine/threonine-protein kinase SCH9	SCH9	>sp|P11792|SCH9_YEAST Serine/threonine-protein kinase SCH9 OS=Saccharomyces cerevisiae (strain ATCC 204508 / S288c) GN=SCH9 PE=1 SV=3	1	1	1	1	0	1	0	1	0	1	1.8	1.8	1.8	91.81	824	824	0	NaN	NaN	NaN	1	1	Median	NaN	NaN	NaN	0	0	Median	NaN	NaN	NaN	1	1	Median	0	1.8	39313000	20052000	19261000	0	0
P11986	P11986	3	3	3	Inositol-3-phosphate synthase	INO1	>sp|P11986|INO1_YEAST Inositol-3-phosphate synthase OS=Saccharomyces cerevisiae (strain ATCC 204508 / S288c) GN=INO1 PE=1 SV=3	1	3	3	3	1	3	1	3	1	3	4.5	4.5	4.5	59.641	533	533	0	0.96466	0.93765	128.42	4	2	Median	NaN	NaN	NaN	1	1	Median	1.0897	0.94146	150.37	3	1	Median	2.1	4.5	956560000	779030000	177530000	121470000	66490000
P12385	P12385	4	4	4	Eukaryotic peptide chain release factor subunit 1	SUP45	>sp|P12385|ERF1_YEAST Eukaryotic peptide chain release factor subunit 1 OS=Saccharomyces cerevisiae (strain ATCC 204508 / S288c) GN=SUP45 PE=1 SV=2	1	4	4	4	4	2	4	2	4	2	9.8	9.8	9.8	49.005	437	437	0	1.0118	0.99445	36.648	6	0	Median	1.115	1.2474	38.199	4	0	Median	0.97364	0.86572	21.766	2	0	Median	9.8	4.8	346920000	175460000	171460000	182830000	95049000
P12612	P12612	5	5	5	T-complex protein 1 subunit alpha	TCP1	>sp|P12612|TCPA_YEAST T-complex protein 1 subunit alpha OS=Saccharomyces cerevisiae (strain ATCC 204508 / S288c) GN=TCP1 PE=1 SV=2	1	5	5	5	2	4	2	4	2	4	9.5	9.5	9.5	60.48	559	559	0	1.8377	1.6193	22.93	3	0	Median	1.016	1.116	84.103	2	1	Median	1.4306	1.2495	24.044	4	2	Median	3.8	8.9	432060000	211000000	221060000	135820000	93060000
P12683;P12684	P12683;P12684	2;1	2;1	2;1	3-hydroxy-3-methylglutaryl-coenzyme A reductase 1;3-hydroxy-3-methylglutaryl-coenzyme A reductase 2	HMG1;HMG2	>sp|P12683|HMDH1_YEAST 3-hydroxy-3-methylglutaryl-coenzyme A reductase 1 OS=Saccharomyces cerevisiae (strain ATCC 204508 / S288c) GN=HMG1 PE=1 SV=1;>sp|P12684|HMDH2_YEAST 3-hydroxy-3-methylglutaryl-coenzyme A reductase 2 OS=Saccharomyces cerevisiae (strain	2	2	2	2	0	2	0	2	0	2	2.1	2.1	2.1	115.62	1054	1054;1045	0	0.70437	0.58528	111.28	2	1	Median	NaN	NaN	NaN	0	0	Median	0.70437	0.58528	111.28	2	1	Median	0	2.1	514360000	333940000	180420000	0	0
P12686	P12686	2	2	2	37S ribosomal protein MRP13, mitochondrial	MRP13	>sp|P12686|RT13_YEAST 37S ribosomal protein MRP13, mitochondrial OS=Saccharomyces cerevisiae (strain ATCC 204508 / S288c) GN=MRP13 PE=1 SV=2	1	2	2	2	2	1	2	1	2	1	7.7	7.7	7.7	38.988	339	339	0.00819	2.6731	2.3898	42.847	3	2	Plateau	1.5679	1.7283	54.513	2	1	Median	NaN	NaN	NaN	1	1	Median	7.7	2.4	95967000	30167000	65800000	47056000	16862000
P12687	P12687	9	9	9	54S ribosomal protein L2, mitochondrial	MRP7	>sp|P12687|RM02_YEAST 54S ribosomal protein L2, mitochondrial OS=Saccharomyces cerevisiae (strain ATCC 204508 / S288c) GN=MRP7 PE=1 SV=1	1	9	9	9	6	6	6	6	6	6	25.3	25.3	25.3	43.226	371	371	0	0.92786	0.97318	25.595	8	0	Median	0.84483	0.97318	29.149	4	0	Median	1.2002	0.99081	24.922	4	0	Median	16.2	17.3	959890000	339550000	620340000	651050000	204850000
P12695	P12695	13	13	13	Dihydrolipoyllysine-residue acetyltransferase component of pyruvate dehydrogenase complex, mitochondrial	LAT1	>sp|P12695|ODP2_YEAST Dihydrolipoyllysine-residue acetyltransferase component of pyruvate dehydrogenase complex, mitochondrial OS=Saccharomyces cerevisiae (strain ATCC 204508 / S288c) GN=LAT1 PE=1 SV=1	1	13	13	13	12	12	12	12	12	12	29	29	29	51.817	482	482	0	1.0002	1.1053	44.052	27	0	Median	0.95455	1.1065	33.542	14	0	Median	1.2275	1.1053	49.266	13	0	Median	25.5	27	2398300000	1174900000	1223400000	1308600000	667100000
P12709	P12709	20	20	20	Glucose-6-phosphate isomerase	PGI1	>sp|P12709|G6PI_YEAST Glucose-6-phosphate isomerase OS=Saccharomyces cerevisiae (strain ATCC 204508 / S288c) GN=PGI1 PE=1 SV=3	1	20	20	20	16	19	16	19	16	19	31.2	31.2	31.2	61.298	554	554	0	0.98211	0.99305	37.521	30	0	Median	1.0323	1.1727	33.268	15	0	Median	0.93255	0.78401	32.898	15	0	Median	26.5	31.2	11947000000	5718800000	6228100000	5404300000	2581100000
P12945	P12945	1	1	1	N-terminal acetyltransferase A complex subunit NAT1	NAT1	>sp|P12945|NAT1_YEAST N-terminal acetyltransferase A complex subunit NAT1 OS=Saccharomyces cerevisiae (strain ATCC 204508 / S288c) GN=NAT1 PE=1 SV=2	1	1	1	1	0	1	0	1	0	1	1.4	1.4	1.4	98.904	854	854	0	NaN	NaN	NaN	1	1	Median	NaN	NaN	NaN	0	0	Median	NaN	NaN	NaN	1	1	Median	0	1.4	27349000	9701400	17648000	0	0
P12962	P12962	1	1	1	Cap-associated protein CAF20	CAF20	>sp|P12962|CAF20_YEAST Cap-associated protein CAF20 OS=Saccharomyces cerevisiae (strain ATCC 204508 / S288c) GN=CAF20 PE=1 SV=2	1	1	1	1	1	1	1	1	1	1	8.7	8.7	8.7	18.223	161	161	0	1.3683	1.2096	28.931	3	3	Median	NaN	NaN	NaN	1	1	Median	1.5066	1.3286	13.276	2	2	Median	8.7	8.7	92002000	39770000	52232000	28424000	14677000
P13188	P13188	4	4	4	Glutamine--tRNA ligase	GLN4	>sp|P13188|SYQ_YEAST Glutamine--tRNA ligase OS=Saccharomyces cerevisiae (strain ATCC 204508 / S288c) GN=GLN4 PE=1 SV=2	1	4	4	4	3	2	3	2	3	2	5.8	5.8	5.8	93.132	809	809	0	0.97732	0.93963	19.071	3	0	Median	0.97732	1.0787	67.688	3	2	Median	1.0319	0.83382	16.895	2	0	Median	4.4	3.1	237400000	139420000	97984000	162130000	98088000
P13517	P13517	2	2	2	F-actin-capping protein subunit beta	CAP2	>sp|P13517|CAPZB_YEAST F-actin-capping protein subunit beta OS=Saccharomyces cerevisiae (strain ATCC 204508 / S288c) GN=CAP2 PE=1 SV=3	1	2	2	2	2	1	2	1	2	1	4.9	4.9	4.9	32.629	287	287	0	NaN	NaN	NaN	0	0	Median	NaN	NaN	NaN	0	0	Median	NaN	NaN	NaN	0	0	Median	4.9	4.5	0	0	0	0	0
P13586	P13586	1	1	1	Calcium-transporting ATPase 1	PMR1	>sp|P13586|ATC1_YEAST Calcium-transporting ATPase 1 OS=Saccharomyces cerevisiae (strain ATCC 204508 / S288c) GN=PMR1 PE=1 SV=1	1	1	1	1	1	1	1	1	1	1	1.9	1.9	1.9	104.57	950	950	0	NaN	NaN	NaN	0	0	Median	NaN	NaN	NaN	0	0	Median	NaN	NaN	NaN	0	0	Median	1.9	1.9	0	0	0	0	0
Q12691;Q01896;P13587	Q12691;Q01896;P13587	2;2;2	2;2;2	2;2;2	Sodium transport ATPase 5;Sodium transport ATPase 2;Sodium transport ATPase 1	ENA5;ENA2;ENA1	>sp|Q12691|ATN5_YEAST Sodium transport ATPase 5 OS=Saccharomyces cerevisiae (strain ATCC 204508 / S288c) GN=ENA5 PE=1 SV=1;>sp|Q01896|ATN2_YEAST Sodium transport ATPase 2 OS=Saccharomyces cerevisiae (strain ATCC 204508 / S288c) GN=ENA2 PE=1 SV=1;>sp|P13587	3	2	2	2	1	2	1	2	1	2	2	2	2	120.29	1091	1091;1091;1091	0	1.0691	0.96962	13.399	3	0	Median	NaN	NaN	NaN	1	0	Median	1.2274	1.0554	11.985	2	0	Median	0.9	2	226360000	110790000	115560000	77910000	40385000
P13663	P13663	17	17	17	Aspartate-semialdehyde dehydrogenase	HOM2	>sp|P13663|DHAS_YEAST Aspartate-semialdehyde dehydrogenase OS=Saccharomyces cerevisiae (strain ATCC 204508 / S288c) GN=HOM2 PE=1 SV=1	1	17	17	17	15	11	15	11	15	11	44.4	44.4	44.4	39.543	365	365	0	1.1194	1.0003	54.68	32	0	Median	1.1548	1.3524	42.322	17	0	Median	0.93873	0.77575	44.593	15	0	Median	43.3	32.9	6158300000	3064400000	3093900000	3221300000	1540500000
P13711	P13711	2	2	2	Acyl-coenzyme A oxidase	POX1	>sp|P13711|ACOX_YEAST Acyl-coenzyme A oxidase OS=Saccharomyces cerevisiae (strain ATCC 204508 / S288c) GN=POX1 PE=1 SV=2	1	2	2	2	0	2	0	2	0	2	2.8	2.8	2.8	84.041	748	748	0	1.0951	0.95574	15.387	2	1	Median	NaN	NaN	NaN	0	0	Median	1.0951	0.95574	15.387	2	1	Median	0	2.8	30648000	14095000	16553000	0	0
P14020	P14020	6	6	6	Dolichol-phosphate mannosyltransferase	DPM1	>sp|P14020|DPM1_YEAST Dolichol-phosphate mannosyltransferase OS=Saccharomyces cerevisiae (strain ATCC 204508 / S288c) GN=DPM1 PE=1 SV=3	1	6	6	6	6	4	6	4	6	4	27	27	27	30.362	267	267	0	1.1573	1.1147	36.331	10	0	Median	1.1573	1.3214	39.133	6	0	Median	1.1984	0.9717	22.969	4	0	Median	27	15.7	1320500000	617820000	702720000	794380000	362180000
P14063	P14063	2	2	2	54S ribosomal protein L31, mitochondrial	MRPL31	>sp|P14063|RM31_YEAST 54S ribosomal protein L31, mitochondrial OS=Saccharomyces cerevisiae (strain ATCC 204508 / S288c) GN=MRPL31 PE=1 SV=1	1	2	2	2	2	0	2	0	2	0	14.5	14.5	14.5	15.52	131	131	0	1.1096	1.2617	17.456	2	0	Median	1.1096	1.2617	17.456	2	0	Median	NaN	NaN	NaN	0	0	Median	14.5	0	94178000	46117000	48061000	94178000	46117000
P14065	P14065	4	4	4	Protein GCY	GCY1	>sp|P14065|GCY1_YEAST Glycerol 2-dehydrogenase (NADP(+)) OS=Saccharomyces cerevisiae (strain ATCC 204508 / S288c) GN=GCY1 PE=1 SV=1	1	4	4	4	2	3	2	3	2	3	14.1	14.1	14.1	35.079	312	312	0	1.4749	1.5645	19.073	3	0	Median	1.2227	1.374	24.803	2	0	Median	0.9506	0.83824	106.43	3	2	Median	7.7	9.9	307530000	215900000	91636000	35400000	15204000
P14120	P14120	9	9	9	60S ribosomal protein L30	RPL30	>sp|P14120|RL30_YEAST 60S ribosomal protein L30 OS=Saccharomyces cerevisiae (strain ATCC 204508 / S288c) GN=RPL30 PE=1 SV=3	1	9	9	9	5	8	5	8	5	8	81.9	81.9	81.9	11.415	105	105	0	1.3181	1.0465	39.911	13	0	Median	0.64652	0.74787	48.834	5	0	Median	1.4656	1.2386	34.138	8	0	Median	42.9	79	2159600000	1040900000	1118700000	840280000	488410000
P14126	P14126	34	34	34	60S ribosomal protein L3	RPL3	>sp|P14126|RL3_YEAST 60S ribosomal protein L3 OS=Saccharomyces cerevisiae (strain ATCC 204508 / S288c) GN=RPL3 PE=1 SV=4	1	34	34	34	32	29	32	29	32	29	65.1	65.1	65.1	43.757	387	387	0	0.95968	1.019	35.834	73	0	Median	0.81258	0.94077	30.47	37	0	Median	1.4178	1.2308	38.003	36	0	Median	63	57.4	27956000000	13219000000	14736000000	13017000000	7384300000
P14306	P14306	3	3	3	Carboxypeptidase Y inhibitor	TFS1	>sp|P14306|CPYI_YEAST Carboxypeptidase Y inhibitor OS=Saccharomyces cerevisiae (strain ATCC 204508 / S288c) GN=TFS1 PE=1 SV=2	1	3	3	3	2	1	2	1	2	1	17.4	17.4	17.4	24.357	219	219	0	1.7386	2.0248	85.791	3	1	Plateau	1.4882	1.6677	27.444	2	0	Median	NaN	NaN	NaN	1	1	Median	12.3	5	111450000	48920000	62528000	91573000	36701000
P14540	P14540	21	21	21	Fructose-bisphosphate aldolase	FBA1	>sp|P14540|ALF_YEAST Fructose-bisphosphate aldolase OS=Saccharomyces cerevisiae (strain ATCC 204508 / S288c) GN=FBA1 PE=1 SV=3	1	21	21	21	19	19	19	19	19	19	49	49	49	39.62	359	359	0	1.0912	1.0468	68.116	60	0	Median	1.421	1.6491	51.099	32	0	Median	0.9308	0.73292	53.385	28	0	Median	47.6	48.7	49259000000	23287000000	25972000000	25413000000	11448000000
P14742	P14742	6	6	6	Glutamine--fructose-6-phosphate aminotransferase [isomerizing]	GFA1	>sp|P14742|GFA1_YEAST Glutamine--fructose-6-phosphate aminotransferase [isomerizing] OS=Saccharomyces cerevisiae (strain ATCC 204508 / S288c) GN=GFA1 PE=1 SV=4	1	6	6	6	5	5	5	5	5	5	9.3	9.3	9.3	80.046	717	717	0	1.3034	1.0645	33.913	8	0	Median	0.75378	0.84416	48.024	4	0	Median	1.4319	1.2049	14.714	4	0	Median	8.4	7.4	583740000	257680000	326070000	243130000	114980000
P14747	P14747	1	1	1	Serine/threonine-protein phosphatase 2B catalytic subunit A2	CMP2	>sp|P14747|PP2B2_YEAST Serine/threonine-protein phosphatase 2B catalytic subunit A2 OS=Saccharomyces cerevisiae (strain ATCC 204508 / S288c) GN=CMP2 PE=1 SV=2	1	1	1	1	1	1	1	1	1	1	1.8	1.8	1.8	68.527	604	604	0	1.1249	1.0679	15.486	2	1	Median	NaN	NaN	NaN	1	0	Median	NaN	NaN	NaN	1	1	Median	1.8	1.8	26725000	10827000	15898000	13642000	4978700
P14772;P0CE69;P39109	P14772;P0CE69;P39109	2;1;1	2;1;1	2;1;1	Bile pigment transporter 1;Putative uncharacterized protein YKR104W;Metal resistance protein YCF1	BPT1;YKR104W;YCF1	>sp|P14772|BPT1_YEAST Bile pigment transporter 1 OS=Saccharomyces cerevisiae (strain ATCC 204508 / S288c) GN=BPT1 PE=1 SV=2;>sp|P0CE69|YK104_YEAST Putative uncharacterized protein YKR104W OS=Saccharomyces cerevisiae (strain ATCC 204508 / S288c) GN=YKR104W	3	2	2	2	2	1	2	1	2	1	1	1	1	176.87	1559	1559;306;1515	0.00092081	0.90706	0.95632	7.3631	3	0	Median	0.85631	0.97031	10.345	2	0	Median	NaN	NaN	NaN	1	0	Median	1	0.6	91568000	44940000	46629000	80118000	39437000
P14832	P14832	8	8	8	Peptidyl-prolyl cis-trans isomerase	CPR1	>sp|P14832|CYPH_YEAST Peptidyl-prolyl cis-trans isomerase OS=Saccharomyces cerevisiae (strain ATCC 204508 / S288c) GN=CPR1 PE=1 SV=3	1	8	8	8	8	8	8	8	8	8	49.4	49.4	49.4	17.39	162	162	0	0.9827	0.97047	44.509	18	0	Median	0.97756	1.106	43.714	10	0	Median	1.0042	0.85709	31.826	8	0	Median	49.4	49.4	3212600000	1621100000	1591500000	1784400000	884930000
P14843	P14843	4	3	3	Phospho-2-dehydro-3-deoxyheptonate aldolase, phenylalanine-inhibited	ARO3	>sp|P14843|AROF_YEAST Phospho-2-dehydro-3-deoxyheptonate aldolase, phenylalanine-inhibited OS=Saccharomyces cerevisiae (strain ATCC 204508 / S288c) GN=ARO3 PE=1 SV=1	1	4	3	3	3	4	2	3	2	3	10.5	8.6	8.6	41.069	370	370	0	0.99436	0.93975	54.115	6	4	Median	0.94695	1.0144	18.523	3	1	Median	1.2245	1.1324	74.476	3	3	Plateau	7	10.5	161240000	88041000	73199000	81116000	41487000
P14904	P14904	9	9	9	Vacuolar aminopeptidase 1	LAP4	>sp|P14904|AMPL_YEAST Vacuolar aminopeptidase 1 OS=Saccharomyces cerevisiae (strain ATCC 204508 / S288c) GN=LAP4 PE=1 SV=2	1	9	9	9	6	8	6	8	6	8	22.8	22.8	22.8	57.092	514	514	0	0.9795	1.0355	50.87	13	0	Median	0.9795	1.1247	43.18	7	0	Median	0.95405	0.80671	46.27	6	0	Median	14.2	21.4	833780000	428680000	405100000	504990000	250710000
P14906	P14906	1	1	1	Protein translocation protein SEC63	SEC63	>sp|P14906|SEC63_YEAST Protein translocation protein SEC63 OS=Saccharomyces cerevisiae (strain ATCC 204508 / S288c) GN=SEC63 PE=1 SV=2	1	1	1	1	1	1	1	1	1	1	1.5	1.5	1.5	75.344	663	663	0.0042481	1.0439	1.0131	30.726	2	0	Median	NaN	NaN	NaN	1	0	Median	NaN	NaN	NaN	1	0	Median	1.5	1.5	118100000	60221000	57882000	56160000	33477000
P14907	P14907	1	1	1	Nucleoporin NSP1	NSP1	>sp|P14907|NSP1_YEAST Nucleoporin NSP1 OS=Saccharomyces cerevisiae (strain ATCC 204508 / S288c) GN=NSP1 PE=1 SV=1	1	1	1	1	0	1	0	1	0	1	1.2	1.2	1.2	86.515	823	823	0.0034394	NaN	NaN	NaN	1	0	Median	NaN	NaN	NaN	0	0	Median	NaN	NaN	NaN	1	0	Median	0	1.2	26612000	14339000	12274000	0	0
P15019	P15019	13	13	13	Transaldolase	TAL1	>sp|P15019|TAL1_YEAST Transaldolase OS=Saccharomyces cerevisiae (strain ATCC 204508 / S288c) GN=TAL1 PE=1 SV=4	1	13	13	13	11	12	11	12	11	12	41.5	41.5	41.5	37.036	335	335	0	0.99183	0.96836	19.52	22	0	Median	0.89713	1.0328	18.311	12	0	Median	1.1253	0.89505	20.382	10	0	Median	35.2	38.2	2749700000	1426900000	1322800000	1321900000	725600000
P15108	P15108	40	40	7	ATP-dependent molecular chaperone HSC82	HSC82	>sp|P15108|HSC82_YEAST ATP-dependent molecular chaperone HSC82 OS=Saccharomyces cerevisiae (strain ATCC 204508 / S288c) GN=HSC82 PE=1 SV=4	1	40	40	7	37	38	37	38	6	7	51.8	51.8	12.6	80.899	705	705	0	0.97947	0.97814	36.332	78	0	Median	1.0084	1.1348	30.529	37	0	Median	0.97579	0.80595	32.863	41	0	Median	47.7	50.2	12716000000	6398800000	6317700000	6410700000	3368700000
P15180	P15180	8	8	8	Lysine--tRNA ligase, cytoplasmic	KRS1	>sp|P15180|SYKC_YEAST Lysine--tRNA ligase, cytoplasmic OS=Saccharomyces cerevisiae (strain ATCC 204508 / S288c) GN=KRS1 PE=1 SV=2	1	8	8	8	8	7	8	7	8	7	14.4	14.4	14.4	67.958	591	591	0	0.89556	0.92934	19.533	12	0	Median	0.79686	0.92934	21.484	6	0	Median	1.1785	0.93079	18.894	6	0	Median	14.4	12.4	1592700000	824780000	767950000	899080000	481940000
P15202	P15202	6	6	6	Peroxisomal catalase A	CTA1	>sp|P15202|CATA_YEAST Peroxisomal catalase A OS=Saccharomyces cerevisiae (strain ATCC 204508 / S288c) GN=CTA1 PE=1 SV=1	1	6	6	6	5	6	5	6	5	6	12.6	12.6	12.6	58.555	515	515	0	0.96235	1.0635	36.316	13	0	Median	0.93607	1.0854	31.816	6	0	Median	1.1698	0.93658	33.166	7	0	Median	11.3	12.6	1160100000	546290000	613770000	522420000	241940000
P15303	P15303	5	5	5	Protein transport protein SEC23	SEC23	>sp|P15303|SEC23_YEAST Protein transport protein SEC23 OS=Saccharomyces cerevisiae (strain ATCC 204508 / S288c) GN=SEC23 PE=1 SV=1	1	5	5	5	4	4	4	4	4	4	7.9	7.9	7.9	85.384	768	768	0	1.1924	1.0587	15.361	7	0	Median	0.84413	0.97204	20.186	4	0	Median	1.4301	1.1405	4.4583	3	0	Median	6.6	6	962770000	503550000	459220000	457440000	268750000
P15365	P15365	1	1	1	Allantoate permease	DAL5	>sp|P15365|DAL5_YEAST Allantoate permease OS=Saccharomyces cerevisiae (strain ATCC 204508 / S288c) GN=DAL5 PE=1 SV=1	1	1	1	1	1	1	1	1	1	1	1.8	1.8	1.8	60.849	543	543	0	1.2338	1.1876	15.231	2	2	Median	NaN	NaN	NaN	1	1	Median	NaN	NaN	NaN	1	1	Median	1.8	1.8	149890000	71735000	78150000	67884000	37368000
P15424	P15424	2	2	2	ATP-dependent RNA helicase MSS116, mitochondrial	MSS116	>sp|P15424|MS116_YEAST ATP-dependent RNA helicase MSS116, mitochondrial OS=Saccharomyces cerevisiae (strain ATCC 204508 / S288c) GN=MSS116 PE=1 SV=1	1	2	2	2	2	2	2	2	2	2	3.2	3.2	3.2	76.268	664	664	0	0.26897	0.21942	38.149	3	2	Plateau	NaN	NaN	NaN	1	1	Median	0.18845	0.15338	50.635	2	1	Median	3.2	3.2	118930000	73256000	45675000	14381000	12765000
P15454	P15454	4	4	4	Guanylate kinase	GUK1	>sp|P15454|KGUA_YEAST Guanylate kinase OS=Saccharomyces cerevisiae (strain ATCC 204508 / S288c) GN=GUK1 PE=1 SV=2	1	4	4	4	2	4	2	4	2	4	24.1	24.1	24.1	20.637	187	187	0	1.0781	0.8984	12.218	3	0	Median	0.90379	1.0582	6.4464	2	1	Median	1.1003	0.89423	14.392	3	1	Plateau	13.4	24.1	199360000	100250000	99111000	57528000	29875000
P15496	P15496	4	4	4	Isopentenyl-diphosphate Delta-isomerase	IDI1	>sp|P15496|IDI1_YEAST Isopentenyl-diphosphate Delta-isomerase OS=Saccharomyces cerevisiae (strain ATCC 204508 / S288c) GN=IDI1 PE=1 SV=2	1	4	4	4	3	3	3	3	3	3	19.1	19.1	19.1	33.351	288	288	0	0.74912	0.82705	44.969	5	0	Median	0.98014	1.1139	42.109	2	0	Median	0.74912	0.63178	40.969	3	0	Median	14.6	14.2	470460000	223370000	247080000	211630000	87551000
P15624	P15624	2	2	2	Phenylalanine--tRNA ligase beta subunit	FRS1	>sp|P15624|SYFB_YEAST Phenylalanine--tRNA ligase beta subunit OS=Saccharomyces cerevisiae (strain ATCC 204508 / S288c) GN=FRS1 PE=1 SV=3	1	2	2	2	2	1	2	1	2	1	5.2	5.2	5.2	67.364	595	595	0	1.4504	1.1634	37.715	3	0	Median	1.1915	1.3603	51.788	2	0	Median	NaN	NaN	NaN	1	0	Median	5.2	1.5	179180000	79496000	99688000	95702000	47837000
P15625	P15625	6	6	6	Phenylalanine--tRNA ligase alpha subunit	FRS2	>sp|P15625|SYFA_YEAST Phenylalanine--tRNA ligase alpha subunit OS=Saccharomyces cerevisiae (strain ATCC 204508 / S288c) GN=FRS2 PE=1 SV=3	1	6	6	6	6	3	6	3	6	3	9.7	9.7	9.7	57.511	503	503	0	1.3583	1.2531	30.575	5	0	Median	1.3583	1.5463	36.85	3	0	Median	1.3757	1.2531	18.69	3	1	Median	9.7	5.8	788000000	354480000	433520000	475640000	225700000
P15646	P15646	12	12	12	rRNA 2-O-methyltransferase fibrillarin	NOP1	>sp|P15646|FBRL_YEAST rRNA 2-O-methyltransferase fibrillarin OS=Saccharomyces cerevisiae (strain ATCC 204508 / S288c) GN=NOP1 PE=1 SV=1	1	12	12	12	11	10	11	10	11	10	47.1	47.1	47.1	34.465	327	327	0	0.96514	0.91595	24.574	27	0	Median	0.79645	0.90972	24.08	14	0	Median	1.2707	1.0672	24.849	13	0	Median	41	36.4	9586200000	4484900000	5101300000	4906900000	2605500000
P15703	P15703	4	4	4	Glucan 1,3-beta-glucosidase	BGL2	>sp|P15703|BGL2_YEAST Glucan 1,3-beta-glucosidase OS=Saccharomyces cerevisiae (strain ATCC 204508 / S288c) GN=BGL2 PE=1 SV=1	1	4	4	4	4	4	4	4	4	4	14.4	14.4	14.4	34.118	313	313	0	1.0618	0.97727	27.168	9	0	Median	1.0618	1.2217	22.073	5	0	Median	0.98941	0.83617	26.537	4	0	Median	14.4	14.4	987250000	520440000	466810000	460440000	263840000
P15705	P15705	8	8	8	Heat shock protein STI1	STI1	>sp|P15705|STI1_YEAST Heat shock protein STI1 OS=Saccharomyces cerevisiae (strain ATCC 204508 / S288c) GN=STI1 PE=1 SV=1	1	8	8	8	6	7	6	7	6	7	16.8	16.8	16.8	66.264	589	589	0	1.0143	1.0575	39.479	11	0	Median	0.99249	1.037	18.146	5	0	Median	1.2567	1.0695	53.131	6	0	Median	11.9	15.6	847460000	401010000	446450000	404880000	191720000
P15873	P15873	1	1	1	Proliferating cell nuclear antigen	POL30	>sp|P15873|PCNA_YEAST Proliferating cell nuclear antigen OS=Saccharomyces cerevisiae (strain ATCC 204508 / S288c) GN=POL30 PE=1 SV=1	1	1	1	1	1	1	1	1	1	1	3.5	3.5	3.5	28.916	258	258	0	1.1556	1.1982	68.411	2	0	Median	NaN	NaN	NaN	1	0	Median	NaN	NaN	NaN	1	0	Median	3.5	3.5	64463000	27409000	37055000	38668000	12482000
P15891	P15891	5	5	5	Actin-binding protein	ABP1	>sp|P15891|ABP1_YEAST Actin-binding protein OS=Saccharomyces cerevisiae (strain ATCC 204508 / S288c) GN=ABP1 PE=1 SV=4	1	5	5	5	4	3	4	3	4	3	9	9	9	65.575	592	592	0	0.92198	0.91555	11.781	5	0	Median	0.88426	1.0064	5.8768	3	0	Median	0.97457	0.85475	8.8785	3	1	Median	7.4	6.2	190810000	101450000	89364000	139180000	74253000
P15992	P15992	10	10	10	Heat shock protein 26	HSP26	>sp|P15992|HSP26_YEAST Heat shock protein 26 OS=Saccharomyces cerevisiae (strain ATCC 204508 / S288c) GN=HSP26 PE=1 SV=3	1	10	10	10	9	7	9	7	9	7	42.5	42.5	42.5	23.879	214	214	0	0.95039	1.0129	14.808	14	0	Median	0.88497	1.0129	13.266	8	0	Median	1.1549	0.96422	17.064	6	0	Median	38.3	35	1436500000	726420000	710050000	805370000	431920000
P16120	P16120	5	5	5	Threonine synthase	THR4	>sp|P16120|THRC_YEAST Threonine synthase OS=Saccharomyces cerevisiae (strain ATCC 204508 / S288c) GN=THR4 PE=1 SV=1	1	5	5	5	4	5	4	5	4	5	10.1	10.1	10.1	57.474	514	514	0	1.2435	1.1951	56.791	9	0	Median	1.2435	1.4203	37.219	5	0	Median	1.0564	0.90311	64.06	4	0	Median	7.6	10.1	698040000	346390000	351660000	334610000	181300000
P16140	P16140	31	31	31	V-type proton ATPase subunit B	VMA2	>sp|P16140|VATB_YEAST V-type proton ATPase subunit B OS=Saccharomyces cerevisiae (strain ATCC 204508 / S288c) GN=VMA2 PE=1 SV=2	1	31	31	31	27	28	27	28	27	28	64.4	64.4	64.4	57.749	517	517	0	1.0773	1.057	37.45	64	0	Median	0.99999	1.1521	33.273	31	0	Median	1.1738	0.95651	35.532	33	0	Median	64.2	60	12249000000	6018800000	6230400000	6749500000	3175400000
P16387	P16387	16	16	16	Pyruvate dehydrogenase E1 component subunit alpha, mitochondrial	PDA1	>sp|P16387|ODPA_YEAST Pyruvate dehydrogenase E1 component subunit alpha, mitochondrial OS=Saccharomyces cerevisiae (strain ATCC 204508 / S288c) GN=PDA1 PE=1 SV=2	1	16	16	16	14	13	14	13	14	13	33.3	33.3	33.3	46.343	420	420	0	0.98496	1.0508	54.886	32	0	Median	1.2598	1.4585	42.354	16	0	Median	0.80769	0.7127	39.317	16	0	Median	31.2	29.8	2501700000	1186700000	1315000000	1273800000	522240000
P16467	P16467	10	6	4	Pyruvate decarboxylase isozyme 2	PDC5	>sp|P16467|PDC5_YEAST Pyruvate decarboxylase isozyme 2 OS=Saccharomyces cerevisiae (strain ATCC 204508 / S288c) GN=PDC5 PE=1 SV=4	1	10	6	4	9	8	5	5	3	3	20.6	13	10.8	61.911	563	563	0	0.98001	1.0424	15.45	9	0	Median	0.86445	0.99361	8.6835	5	0	Median	1.3672	1.1926	18.691	4	0	Median	16.5	16.3	812760000	394950000	417810000	455860000	241650000
P16474	P16474	17	14	14	78 kDa glucose-regulated protein homolog	KAR2	>sp|P16474|GRP78_YEAST 78 kDa glucose-regulated protein homolog OS=Saccharomyces cerevisiae (strain ATCC 204508 / S288c) GN=KAR2 PE=1 SV=1	1	17	14	14	16	14	14	11	14	11	25.2	22.9	22.9	74.467	682	682	0	0.92207	0.9404	34.955	13	0	Median	0.91954	1.0485	29.106	7	0	Median	0.92638	0.79197	24.505	6	0	Median	25.2	20.4	1910800000	1052500000	858290000	1050400000	538500000
P16521	P16521	48	48	36	Elongation factor 3A	YEF3	>sp|P16521|EF3A_YEAST Elongation factor 3A OS=Saccharomyces cerevisiae (strain ATCC 204508 / S288c) GN=YEF3 PE=1 SV=4	1	48	48	36	41	44	41	44	29	32	41.8	41.8	33.8	115.94	1044	1044	0	1.1011	1.0599	42.46	100	0	Median	1.1395	1.3079	39.681	50	0	Median	1.0914	0.91139	34.208	50	0	Median	37.5	38.9	27204000000	13515000000	13689000000	14386000000	7229500000
P16547	P16547	22	22	22	Mitochondrial outer membrane protein OM45	OM45	>sp|P16547|OM45_YEAST Mitochondrial outer membrane protein OM45 OS=Saccharomyces cerevisiae (strain ATCC 204508 / S288c) GN=OM45 PE=1 SV=2	1	22	22	22	17	20	17	20	17	20	55.2	55.2	55.2	44.58	393	393	0	1.0188	0.966	55.143	35	0	Median	1.0221	1.1553	35.344	16	0	Median	1.0091	0.86281	58.441	19	0	Median	47.6	53.4	6479800000	2979400000	3500400000	3291200000	1478500000
P16550	P16550	4	4	4	Protein APA1;5,5-P-1,P-4-tetraphosphate phosphorylase;ADP-sulfurylase	APA1	>sp|P16550|APA1_YEAST Protein APA1 OS=Saccharomyces cerevisiae (strain ATCC 204508 / S288c) GN=APA1 PE=1 SV=4	1	4	4	4	2	3	2	3	2	3	11.5	11.5	11.5	36.492	321	321	0	1.3155	1.1366	20.818	3	0	Median	NaN	NaN	NaN	1	0	Median	1.3155	1.1366	63.572	3	1	Median	7.2	6.9	321870000	155480000	166400000	90342000	49411000
P16603	P16603	5	5	5	NADPH--cytochrome P450 reductase	NCP1	>sp|P16603|NCPR_YEAST NADPH--cytochrome P450 reductase OS=Saccharomyces cerevisiae (strain ATCC 204508 / S288c) GN=NCP1 PE=1 SV=3	1	5	5	5	4	4	4	4	4	4	9.8	9.8	9.8	76.771	691	691	0	1.1883	1.0409	51.842	8	0	Median	1.4925	1.6343	13.447	3	0	Median	1.0752	0.88156	42.446	5	0	Median	7.5	6.1	452320000	235570000	216750000	236320000	122530000
P16622	P16622	4	4	4	Ferrochelatase, mitochondrial	HEM15	>sp|P16622|HEMH_YEAST Ferrochelatase, mitochondrial OS=Saccharomyces cerevisiae (strain ATCC 204508 / S288c) GN=HEM15 PE=1 SV=1	1	4	4	4	2	4	2	4	2	4	17.3	17.3	17.3	44.596	393	393	0	0.90921	0.85673	52.038	6	0	Median	1.3119	1.4093	39.984	2	0	Median	0.80073	0.67133	38.113	4	0	Median	7.1	17.3	301720000	153440000	148290000	102500000	49166000
P16658	P16658	1	1	1	tRNA-splicing endonuclease subunit SEN2	SEN2	>sp|P16658|SEN2_YEAST tRNA-splicing endonuclease subunit SEN2 OS=Saccharomyces cerevisiae (strain ATCC 204508 / S288c) GN=SEN2 PE=1 SV=1	1	1	1	1	1	1	1	1	1	1	1.9	1.9	1.9	44.109	377	377	0.0074257	1.1317	1.0696	31.919	2	0	Median	NaN	NaN	NaN	1	0	Median	NaN	NaN	NaN	1	0	Median	1.9	1.9	26643000	14284000	12359000	15517000	8288200
P16861	P16861	16	16	16	6-phosphofructokinase subunit alpha	PFK1	>sp|P16861|PFKA1_YEAST ATP-dependent 6-phosphofructokinase subunit alpha OS=Saccharomyces cerevisiae (strain ATCC 204508 / S288c) GN=PFK1 PE=1 SV=1	1	16	16	16	15	13	15	13	15	13	18.8	18.8	18.8	107.97	987	987	0	1.052	0.95827	24.693	24	0	Median	0.85861	0.93849	24.01	11	0	Median	1.11	0.96466	24.36	13	0	Median	18	16.4	2979700000	1608300000	1371400000	1643300000	943330000
P16862	P16862	14	14	14	6-phosphofructokinase subunit beta	PFK2	>sp|P16862|PFKA2_YEAST ATP-dependent 6-phosphofructokinase subunit beta OS=Saccharomyces cerevisiae (strain ATCC 204508 / S288c) GN=PFK2 PE=1 SV=4	1	14	14	14	12	14	12	14	12	14	16.8	16.8	16.8	104.62	959	959	0	0.95152	0.99149	33.996	30	0	Median	0.94685	1.0756	15.789	12	0	Median	0.96476	0.79804	33.469	18	0	Median	14.5	16.8	6597600000	3305000000	3292700000	3106500000	1628100000
P17076	P17076	29	29	7	60S ribosomal protein L8-A	RPL8A	>sp|P17076|RL8A_YEAST 60S ribosomal protein L8-A OS=Saccharomyces cerevisiae (strain ATCC 204508 / S288c) GN=RPL8A PE=1 SV=4	1	29	29	7	28	26	28	26	7	7	80.9	80.9	19.9	28.124	256	256	0	0.92865	0.883	27.673	66	0	Median	0.74392	0.87082	27.545	31	0	Median	1.1059	0.93377	26.685	35	0	Median	80.5	71.5	47918000000	22305000000	25613000000	24667000000	14397000000
P17214	P17214	1	1	1	Telomere elongation protein EST1	EST1	>sp|P17214|EST1_YEAST Telomere elongation protein EST1 OS=Saccharomyces cerevisiae (strain ATCC 204508 / S288c) GN=EST1 PE=1 SV=2	1	1	1	1	1	0	1	0	1	0	1.4	1.4	1.4	81.799	699	699	0.009772	NaN	NaN	NaN	1	0	Median	NaN	NaN	NaN	1	0	Median	NaN	NaN	NaN	0	0	Median	1.4	0	657020000	414640000	242380000	657020000	414640000
P17255	P17255	20	20	20	V-type proton ATPase catalytic subunit A;Endonuclease PI-SceI	VMA1	>sp|P17255|VATA_YEAST V-type proton ATPase catalytic subunit A OS=Saccharomyces cerevisiae (strain ATCC 204508 / S288c) GN=VMA1 PE=1 SV=3	1	20	20	20	19	16	19	16	19	16	20.7	20.7	20.7	118.64	1071	1071	0	0.95638	0.9871	35.13	38	0	Median	0.79696	0.91829	24.838	19	0	Median	1.2235	1.0429	42.987	19	0	Median	19.7	18.8	12984000000	7454000000	5529500000	6711000000	4289400000
P17423	P17423	5	5	5	Homoserine kinase	THR1	>sp|P17423|KHSE_YEAST Homoserine kinase OS=Saccharomyces cerevisiae (strain ATCC 204508 / S288c) GN=THR1 PE=1 SV=4	1	5	5	5	3	5	3	5	3	5	21.3	21.3	21.3	38.712	357	357	0	0.95747	0.98336	23.409	6	0	Median	0.74864	0.8347	26.41	3	0	Median	1.235	1.0199	5.2387	3	0	Median	13.2	21.3	558740000	280420000	278320000	252030000	148080000
P17505	P17505	17	17	17	Malate dehydrogenase, mitochondrial	MDH1	>sp|P17505|MDHM_YEAST Malate dehydrogenase, mitochondrial OS=Saccharomyces cerevisiae (strain ATCC 204508 / S288c) GN=MDH1 PE=1 SV=2	1	17	17	17	15	15	15	15	15	15	53.9	53.9	53.9	35.65	334	334	0	1.0231	1.0387	36.52	34	0	Median	1.0108	1.1527	24.873	19	0	Median	1.0515	0.88422	38.85	15	0	Median	47.3	50.3	9051300000	4308200000	4743100000	4821400000	2274900000
P17555	P17555	2	2	2	Adenylyl cyclase-associated protein	SRV2	>sp|P17555|CAP_YEAST Adenylyl cyclase-associated protein OS=Saccharomyces cerevisiae (strain ATCC 204508 / S288c) GN=SRV2 PE=1 SV=1	1	2	2	2	2	2	2	2	2	2	3.2	3.2	3.2	57.521	526	526	0	0.85405	0.96347	25.466	4	0	Median	0.83558	0.96347	2.3091	2	0	Median	1.1538	0.94697	44.015	2	0	Median	3.2	3.2	403680000	197640000	206050000	208140000	116370000
P17558	P17558	7	7	7	37S ribosomal protein PET123, mitochondrial	PET123	>sp|P17558|RTPT_YEAST 37S ribosomal protein PET123, mitochondrial OS=Saccharomyces cerevisiae (strain ATCC 204508 / S288c) GN=PET123 PE=1 SV=1	1	7	7	7	7	4	7	4	7	4	19.8	19.8	19.8	35.998	318	318	0	0.77438	0.84632	51.954	10	0	Median	0.58582	0.67642	24.357	6	0	Median	1.9201	1.6504	39.697	4	0	Median	19.8	14.5	1178200000	804780000	373440000	861080000	705410000
P17649	P17649	8	8	8	4-aminobutyrate aminotransferase	UGA1	>sp|P17649|GABAT_YEAST 4-aminobutyrate aminotransferase OS=Saccharomyces cerevisiae (strain ATCC 204508 / S288c) GN=UGA1 PE=1 SV=2	1	8	8	8	7	8	7	8	7	8	17.2	17.2	17.2	52.946	471	471	0	1.061	1.1753	35.945	14	0	Median	1.0801	1.2343	26.963	7	0	Median	1.0119	0.85388	30.842	7	0	Median	17.2	17.2	979130000	471680000	507450000	575340000	257540000
P17695	P17695	7	7	7	Glutaredoxin-2, mitochondrial	GRX2	>sp|P17695|GLRX2_YEAST Glutaredoxin-2, mitochondrial OS=Saccharomyces cerevisiae (strain ATCC 204508 / S288c) GN=GRX2 PE=1 SV=3	1	7	7	7	5	6	5	6	5	6	39.2	39.2	39.2	15.861	143	143	0	0.99254	1.0351	12.909	12	0	Median	0.8732	0.9882	14.069	7	0	Median	1.2863	1.092	12.499	5	0	Median	30.8	39.2	2761300000	1337100000	1424200000	1519000000	796640000
P17709	P17709	7	7	6	Glucokinase-1	GLK1	>sp|P17709|HXKG_YEAST Glucokinase-1 OS=Saccharomyces cerevisiae (strain ATCC 204508 / S288c) GN=GLK1 PE=1 SV=1	1	7	7	6	6	6	6	6	5	5	15.8	15.8	13	55.377	500	500	0	1.0919	1.0393	23.472	9	0	Median	0.96814	1.0993	30.558	5	0	Median	1.1873	0.99053	11.446	4	0	Median	14.4	14.4	961780000	460740000	501040000	507670000	258270000
P17883	P17883	3	3	3	Superkiller protein 3	SKI3	>sp|P17883|SKI3_YEAST Superkiller protein 3 OS=Saccharomyces cerevisiae (strain ATCC 204508 / S288c) GN=SKI3 PE=1 SV=2	1	3	3	3	3	2	3	2	3	2	2.7	2.7	2.7	163.72	1432	1432	0	0.92213	1.013	19.669	4	0	Median	0.8011	0.90088	20.522	3	0	Median	1.3919	1.1908	6.2715	2	1	Median	2.7	1.6	59836000	29861000	29975000	43626000	22657000
P17891	P17891	1	1	1	Clathrin light chain	CLC1	>sp|P17891|CLC1_YEAST Clathrin light chain OS=Saccharomyces cerevisiae (strain ATCC 204508 / S288c) GN=CLC1 PE=1 SV=1	1	1	1	1	1	1	1	1	1	1	5.6	5.6	5.6	26.531	233	233	0.00088731	0.94045	0.88206	19.707	2	0	Median	NaN	NaN	NaN	1	0	Median	NaN	NaN	NaN	1	0	Median	5.6	5.6	25965000	12494000	13471000	11645000	6040600
P17898	P17898	1	1	1	Cholinephosphotransferase 1	CPT1	>sp|P17898|CPT1_YEAST Cholinephosphotransferase 1 OS=Saccharomyces cerevisiae (strain ATCC 204508 / S288c) GN=CPT1 PE=1 SV=3	1	1	1	1	1	1	1	1	1	1	3.3	3.3	3.3	44.829	393	393	0.0017256	1.0787	1.047	43.415	2	1	Median	NaN	NaN	NaN	1	1	Median	NaN	NaN	NaN	1	0	Median	3.3	3.3	24615000	10626000	13989000	12387000	6604700
P17967	P17967	7	7	7	Protein disulfide-isomerase	PDI1	>sp|P17967|PDI_YEAST Protein disulfide-isomerase OS=Saccharomyces cerevisiae (strain ATCC 204508 / S288c) GN=PDI1 PE=1 SV=2	1	7	7	7	7	7	7	7	7	7	10.7	10.7	10.7	58.226	522	522	0	1.059	1.0396	28.538	14	0	Median	0.86499	1.016	18.624	7	0	Median	1.2757	1.0638	36.808	7	0	Median	10.7	10.7	813430000	396910000	416530000	410700000	222430000
P18239;P18238	P18239	24;4	24;4	22;2	ADP,ATP carrier protein 2	PET9	>sp|P18239|ADT2_YEAST ADP,ATP carrier protein 2 OS=Saccharomyces cerevisiae (strain ATCC 204508 / S288c) GN=PET9 PE=1 SV=2	2	24	24	22	22	20	22	20	20	18	48.1	48.1	43.7	34.426	318	318;307	0	0.96483	1.0278	50.968	41	0	Median	1.0289	1.2018	47.474	23	0	Median	0.91994	0.78188	33.614	18	0	Median	42.1	48.1	17825000000	8087600000	9737500000	9326900000	4119300000
P18544	P18544	1	1	1	Acetylornithine aminotransferase, mitochondrial	ARG8	>sp|P18544|ARGD_YEAST Acetylornithine aminotransferase, mitochondrial OS=Saccharomyces cerevisiae (strain ATCC 204508 / S288c) GN=ARG8 PE=1 SV=1	1	1	1	1	1	0	1	0	1	0	2.6	2.6	2.6	46.681	423	423	0.0074013	NaN	NaN	NaN	1	0	Median	NaN	NaN	NaN	1	0	Median	NaN	NaN	NaN	0	0	Median	2.6	0	7090100	3844000	3246100	7090100	3844000
P18562	P18562	4	4	4	Uracil phosphoribosyltransferase	FUR1	>sp|P18562|UPP_YEAST Uracil phosphoribosyltransferase OS=Saccharomyces cerevisiae (strain ATCC 204508 / S288c) GN=FUR1 PE=1 SV=2	1	4	4	4	4	2	4	2	4	2	27.3	27.3	27.3	24.594	216	216	0	1.1458	1.3195	31.166	4	0	Median	1.2733	1.4543	21.493	3	0	Median	0.87043	0.77579	17.917	2	1	Median	27.3	16.7	287440000	153030000	134420000	211290000	113630000
P18759	P18759	1	1	1	Vesicular-fusion protein SEC18	SEC18	>sp|P18759|SEC18_YEAST Vesicular-fusion protein SEC18 OS=Saccharomyces cerevisiae (strain ATCC 204508 / S288c) GN=SEC18 PE=1 SV=2	1	1	1	1	1	0	1	0	1	0	1.6	1.6	1.6	84.055	758	758	0.0058972	NaN	NaN	NaN	1	1	Median	NaN	NaN	NaN	1	1	Median	NaN	NaN	NaN	0	0	Median	1.6	0	12276000	8267200	4008500	12276000	8267200
P18899	P18899	2	2	2	Stress protein DDR48	DDR48	>sp|P18899|DDR48_YEAST Stress protein DDR48 OS=Saccharomyces cerevisiae (strain ATCC 204508 / S288c) GN=DDR48 PE=1 SV=4	1	2	2	2	1	1	1	1	1	1	13.7	13.7	13.7	46.233	430	430	0	0.69606	0.64213	31.348	2	0	Median	NaN	NaN	NaN	1	0	Median	NaN	NaN	NaN	1	0	Median	1.6	12.1	34683000	19084000	15599000	16914000	9367700
P18900	P18900	2	2	2	Hexaprenyl pyrophosphate synthase, mitochondrial	COQ1	>sp|P18900|COQ1_YEAST Hexaprenyl pyrophosphate synthase, mitochondrial OS=Saccharomyces cerevisiae (strain ATCC 204508 / S288c) GN=COQ1 PE=1 SV=1	1	2	2	2	1	2	1	2	1	2	5.3	5.3	5.3	52.559	473	473	0	0.9518	0.86077	22.949	3	0	Median	NaN	NaN	NaN	1	0	Median	0.91558	0.75754	18.068	2	0	Median	2.7	5.3	336960000	173970000	163000000	143520000	76701000
P18963	P18963	2	2	2	Inhibitory regulator protein IRA1	IRA1	>sp|P18963|IRA1_YEAST Inhibitory regulator protein IRA1 OS=Saccharomyces cerevisiae (strain ATCC 204508 / S288c) GN=IRA1 PE=1 SV=2	1	2	2	2	2	0	2	0	2	0	0.6	0.6	0.6	350.98	3092	3092	0.0017316	NaN	NaN	NaN	1	0	Median	NaN	NaN	NaN	1	0	Median	NaN	NaN	NaN	0	0	Median	0.6	0	11946000	7065200	4880600	11946000	7065200
P19073	P19073	2	2	2	Cell division control protein 42	CDC42	>sp|P19073|CDC42_YEAST Cell division control protein 42 OS=Saccharomyces cerevisiae (strain ATCC 204508 / S288c) GN=CDC42 PE=1 SV=2	1	2	2	2	1	2	1	2	1	2	11	11	11	21.322	191	191	0	0.99958	0.85701	39.573	3	0	Median	1.4838	1.6768	4.6464	2	1	Median	0.99958	0.85701	23.719	3	1	Median	5.8	11	651230000	289570000	361660000	297170000	120530000
P19097	P19097	51	51	51	Fatty acid synthase subunit alpha;Acyl carrier;3-oxoacyl-[acyl-carrier-protein] reductase;3-oxoacyl-[acyl-carrier-protein] synthase	FAS2	>sp|P19097|FAS2_YEAST Fatty acid synthase subunit alpha OS=Saccharomyces cerevisiae (strain ATCC 204508 / S288c) GN=FAS2 PE=1 SV=2	1	51	51	51	44	44	44	44	44	44	27.1	27.1	27.1	206.94	1887	1887	0	1.0351	1.0165	34.669	85	0	Median	0.98168	1.0892	36.171	40	0	Median	1.0874	0.93144	26.29	45	0	Median	25.5	25	13701000000	6891300000	6810000000	6557500000	3365600000
P19145	P19145	2	2	2	General amino-acid permease GAP1	GAP1	>sp|P19145|GAP1_YEAST General amino-acid permease GAP1 OS=Saccharomyces cerevisiae (strain ATCC 204508 / S288c) GN=GAP1 PE=1 SV=2	1	2	2	2	1	2	1	2	1	2	5	5	5	65.655	602	602	0	0.98273	1.0326	30.36	3	1	Median	NaN	NaN	NaN	1	0	Median	0.93818	0.80404	35.382	2	1	Median	2.5	5	341070000	184270000	156810000	140180000	72854000
P19262	P19262	10	10	10	Dihydrolipoyllysine-residue succinyltransferase component of 2-oxoglutarate dehydrogenase complex, mitochondrial	KGD2	>sp|P19262|ODO2_YEAST Dihydrolipoyllysine-residue succinyltransferase component of 2-oxoglutarate dehydrogenase complex, mitochondrial OS=Saccharomyces cerevisiae (strain ATCC 204508 / S288c) GN=KGD2 PE=1 SV=2	1	10	10	10	8	10	8	10	8	10	23.8	23.8	23.8	50.43	463	463	0	1.0005	0.9406	29.077	19	0	Median	0.80598	0.9406	30.852	9	0	Median	1.177	1.0027	28.851	10	0	Median	18.1	23.8	2577900000	1286000000	1291900000	1214300000	679890000
P19358	P19358	18	18	7	S-adenosylmethionine synthase 2	SAM2	>sp|P19358|METK2_YEAST S-adenosylmethionine synthase 2 OS=Saccharomyces cerevisiae (strain ATCC 204508 / S288c) GN=SAM2 PE=1 SV=3	1	18	18	7	13	15	13	15	4	6	52.1	52.1	22.7	42.255	384	384	0	0.96474	0.91564	34.714	36	0	Median	1.0085	1.145	22.853	18	0	Median	0.92182	0.72855	23.655	18	0	Median	40.4	37.2	9523200000	4768100000	4755000000	4803200000	2418600000
P19414	P19414	37	37	35	Aconitate hydratase, mitochondrial	ACO1	>sp|P19414|ACON_YEAST Aconitate hydratase, mitochondrial OS=Saccharomyces cerevisiae (strain ATCC 204508 / S288c) GN=ACO1 PE=1 SV=2	1	37	37	35	33	34	33	34	31	32	45.2	45.2	44.2	85.367	778	778	0	1.0305	1.0133	53.058	89	0	Median	1.0694	1.2181	43.247	43	0	Median	0.91852	0.76151	39.26	46	0	Median	42.4	43.1	21010000000	10159000000	10850000000	10345000000	4830900000
P19524	P19524	3	3	3	Myosin-2	MYO2	>sp|P19524|MYO2_YEAST Myosin-2 OS=Saccharomyces cerevisiae (strain ATCC 204508 / S288c) GN=MYO2 PE=1 SV=1	1	3	3	3	1	2	1	2	1	2	2.9	2.9	2.9	180.68	1574	1574	0	0.7885	0.898	38.576	3	2	Median	NaN	NaN	NaN	1	0	Median	0.94711	0.79029	53.547	2	2	Median	0.9	2	41932000	23959000	17972000	27223000	16090000
P19880	P19880	1	1	1	AP-1-like transcription factor YAP1	YAP1	>sp|P19880|YAP1_YEAST AP-1-like transcription factor YAP1 OS=Saccharomyces cerevisiae (strain ATCC 204508 / S288c) GN=YAP1 PE=1 SV=2	1	1	1	1	1	1	1	1	1	1	2.6	2.6	2.6	72.532	650	650	0	1.0946	1.0954	69.828	2	1	Median	NaN	NaN	NaN	1	1	Median	NaN	NaN	NaN	1	0	Median	2.6	2.6	31512000	13062000	18450000	14666000	8804600
P19882	P19882	38	38	38	Heat shock protein 60, mitochondrial	HSP60	>sp|P19882|HSP60_YEAST Heat shock protein 60, mitochondrial OS=Saccharomyces cerevisiae (strain ATCC 204508 / S288c) GN=HSP60 PE=1 SV=1	1	38	38	38	33	33	33	33	33	33	51.7	51.7	51.7	60.751	572	572	0	1.0051	0.98942	34.822	62	0	Median	1.0296	1.1958	26.615	32	0	Median	0.90815	0.74494	30.762	30	0	Median	51.2	48.4	14825000000	7196100000	7628600000	7474300000	3641000000
P19955	P19955	2	2	2	37S ribosomal protein YMR-31, mitochondrial	YMR31	>sp|P19955|RT31_YEAST 37S ribosomal protein YMR-31, mitochondrial OS=Saccharomyces cerevisiae (strain ATCC 204508 / S288c) GN=YMR31 PE=1 SV=1	1	2	2	2	1	1	1	1	1	1	21.1	21.1	21.1	13.689	123	123	0.00088889	3.7262	4.2173	155.04	3	2	Median	4.1943	4.8928	21.009	2	2	Median	NaN	NaN	NaN	1	0	Median	8.1	13	84529000	26678000	57851000	65659000	15358000
P20051	P20051	1	1	1	Dihydroorotase	URA4	>sp|P20051|PYRC_YEAST Dihydroorotase OS=Saccharomyces cerevisiae (strain ATCC 204508 / S288c) GN=URA4 PE=1 SV=2	1	1	1	1	1	1	1	1	1	1	3	3	3	40.313	364	364	0.00088028	1.1478	1.0513	10.226	2	2	Median	NaN	NaN	NaN	1	1	Median	NaN	NaN	NaN	1	1	Median	3	3	82295000	38766000	43530000	41990000	21554000
P20081	P20081	3	3	3	FK506-binding protein 1	FPR1	>sp|P20081|FKBP_YEAST FK506-binding protein 1 OS=Saccharomyces cerevisiae (strain ATCC 204508 / S288c) GN=FPR1 PE=1 SV=2	1	3	3	3	2	2	2	2	2	2	21.1	21.1	21.1	12.158	114	114	0	0.96406	0.95278	131.13	4	2	Median	0.44643	0.5031	67.077	2	1	Median	3.2889	2.8366	131.05	2	1	Median	18.4	21.1	475270000	237790000	237480000	213070000	132020000
P20084	P20084	2	2	2	54S ribosomal protein L33, mitochondrial	MRPL33	>sp|P20084|RM33_YEAST 54S ribosomal protein L33, mitochondrial OS=Saccharomyces cerevisiae (strain ATCC 204508 / S288c) GN=MRPL33 PE=1 SV=4	1	2	2	2	1	1	1	1	1	1	23.3	23.3	23.3	9.5311	86	86	0.0017422	0.53213	0.52992	68.429	2	0	Median	NaN	NaN	NaN	1	0	Median	NaN	NaN	NaN	1	0	Median	12.8	10.5	122860000	70508000	52351000	103500000	55182000
P20107	P20107	1	1	1	Zinc/cadmium resistance protein	ZRC1	>sp|P20107|ZRC1_YEAST Zinc/cadmium resistance protein OS=Saccharomyces cerevisiae (strain ATCC 204508 / S288c) GN=ZRC1 PE=1 SV=2	1	1	1	1	1	1	1	1	1	1	3.8	3.8	3.8	48.344	442	442	0	1.2287	1.0526	23.818	3	0	Median	NaN	NaN	NaN	1	0	Median	1.3204	1.0837	4.1226	2	0	Median	3.8	3.8	85654000	41125000	44529000	28528000	15749000
P20424	P20424	5	5	5	Signal recognition particle subunit SRP54	SRP54	>sp|P20424|SRP54_YEAST Signal recognition particle subunit SRP54 OS=Saccharomyces cerevisiae (strain ATCC 204508 / S288c) GN=SRP54 PE=1 SV=2	1	5	5	5	3	3	3	3	3	3	10.4	10.4	10.4	59.624	541	541	0	0.94759	1.1131	12.533	5	0	Median	0.93378	1.0018	6.6576	3	0	Median	1.5275	1.3243	48.78	3	1	Median	6.3	7.4	148400000	64692000	83704000	80374000	37656000
P20434	P20434	14	14	14	DNA-directed RNA polymerases I, II, and III subunit RPABC1	RPB5	>sp|P20434|RPAB1_YEAST DNA-directed RNA polymerases I, II, and III subunit RPABC1 OS=Saccharomyces cerevisiae (strain ATCC 204508 / S288c) GN=RPB5 PE=1 SV=1	1	14	14	14	13	13	13	13	13	13	50.7	50.7	50.7	25.079	215	215	0	0.85904	0.76916	61.646	28	0	Median	1.5286	1.7616	41.219	14	0	Median	0.68037	0.55803	18.7	14	0	Median	47	50.7	2903300000	1458400000	1444900000	1439000000	586120000
P20435	P20435	10	10	10	DNA-directed RNA polymerases I, II, and III subunit RPABC2	RPO26	>sp|P20435|RPAB2_YEAST DNA-directed RNA polymerases I, II, and III subunit RPABC2 OS=Saccharomyces cerevisiae (strain ATCC 204508 / S288c) GN=RPO26 PE=1 SV=1	1	10	10	10	9	7	9	7	9	7	56.1	56.1	56.1	17.91	155	155	0	1.1037	0.96161	54.461	10	0	Median	1.6591	1.791	36.636	3	0	Median	0.86087	0.70408	33.597	7	0	Median	56.1	51.6	2470800000	1171100000	1299700000	530950000	221060000
P20436	P20436	4	4	4	DNA-directed RNA polymerases I, II, and III subunit RPABC3	RPB8	>sp|P20436|RPAB3_YEAST DNA-directed RNA polymerases I, II, and III subunit RPABC3 OS=Saccharomyces cerevisiae (strain ATCC 204508 / S288c) GN=RPB8 PE=1 SV=1	1	4	4	4	2	2	2	2	2	2	26	26	26	16.511	146	146	0	0.59956	0.54241	86.684	3	2	Median	0.9889	1.1303	103.84	2	2	Median	NaN	NaN	NaN	1	0	Median	18.5	17.8	237130000	137310000	99820000	107630000	51101000
P20447	P20447	6	6	6	ATP-dependent RNA helicase DBP3	DBP3	>sp|P20447|DBP3_YEAST ATP-dependent RNA helicase DBP3 OS=Saccharomyces cerevisiae (strain ATCC 204508 / S288c) GN=DBP3 PE=1 SV=2	1	6	6	6	4	4	4	4	4	4	13.8	13.8	13.8	58.826	523	523	0	1.2048	1.1393	38.733	6	0	Median	1.4846	1.6985	17.871	3	0	Median	1.2035	0.93068	26.309	3	0	Median	10.1	9	502420000	270860000	231560000	287270000	166960000
P20448	P20448	2	2	2	ATP-dependent RNA helicase HCA4	HCA4	>sp|P20448|DBP4_YEAST ATP-dependent RNA helicase HCA4 OS=Saccharomyces cerevisiae (strain ATCC 204508 / S288c) GN=HCA4 PE=1 SV=2	1	2	2	2	1	1	1	1	1	1	1.9	1.9	1.9	87.192	770	770	0.0096618	1.2378	1.2472	14.903	2	0	Median	NaN	NaN	NaN	1	0	Median	NaN	NaN	NaN	1	0	Median	1	0.9	33962000	15678000	18284000	20099000	11411000
P20449	P20449	2	2	2	ATP-dependent RNA helicase DBP5	DBP5	>sp|P20449|DBP5_YEAST ATP-dependent RNA helicase DBP5 OS=Saccharomyces cerevisiae (strain ATCC 204508 / S288c) GN=DBP5 PE=1 SV=2	1	2	2	2	2	0	2	0	2	0	5.2	5.2	5.2	53.873	482	482	0	1.1152	1.2166	14.14	2	0	Median	1.1152	1.2166	14.14	2	0	Median	NaN	NaN	NaN	0	0	Median	5.2	0	45659000	27448000	18211000	45659000	27448000
P20604	P20604	1	1	1	Serine/threonine-protein phosphatase PP1-1	SIT4	>sp|P20604|PP11_YEAST Serine/threonine-protein phosphatase PP1-1 OS=Saccharomyces cerevisiae (strain ATCC 204508 / S288c) GN=SIT4 PE=1 SV=1	1	1	1	1	1	0	1	0	1	0	4.2	4.2	4.2	35.537	311	311	0	NaN	NaN	NaN	1	0	Median	NaN	NaN	NaN	1	0	Median	NaN	NaN	NaN	0	0	Median	4.2	0	21595000	6583300	15011000	21595000	6583300
P20606	P20606	1	1	1	Small COPII coat GTPase SAR1	SAR1	>sp|P20606|SAR1_YEAST Small COPII coat GTPase SAR1 OS=Saccharomyces cerevisiae (strain ATCC 204508 / S288c) GN=SAR1 PE=1 SV=1	1	1	1	1	1	1	1	1	1	1	6.8	6.8	6.8	21.45	190	190	0	1.0316	1.0093	17.344	2	2	Median	NaN	NaN	NaN	1	1	Median	NaN	NaN	NaN	1	1	Median	6.8	6.8	334780000	155240000	179530000	168780000	91383000
P20967	P20967	15	15	15	2-oxoglutarate dehydrogenase, mitochondrial	KGD1	>sp|P20967|ODO1_YEAST 2-oxoglutarate dehydrogenase, mitochondrial OS=Saccharomyces cerevisiae (strain ATCC 204508 / S288c) GN=KGD1 PE=1 SV=2	1	15	15	15	13	13	13	13	13	13	16.9	16.9	16.9	114.41	1014	1014	0	1.0735	0.95549	26.086	26	0	Median	0.99705	1.1285	29.204	14	0	Median	1.127	0.94492	17.592	12	0	Median	15.9	14.4	2958300000	1501500000	1456800000	1412900000	763920000
P21147	P21147	6	6	6	Acyl-CoA desaturase 1	OLE1	>sp|P21147|ACO1_YEAST Acyl-CoA desaturase 1 OS=Saccharomyces cerevisiae (strain ATCC 204508 / S288c) GN=OLE1 PE=1 SV=2	1	6	6	6	6	6	6	6	6	6	11.2	11.2	11.2	58.402	510	510	0	1.114	1.1821	59.345	11	0	Median	1.0044	1.1625	56.447	6	0	Median	1.3889	1.1821	50.339	5	0	Median	11.2	11.2	1896300000	871760000	1024600000	893780000	431310000
P21242	P21242	8	8	8	Probable proteasome subunit alpha type-7	PRE10	>sp|P21242|PSA7_YEAST Probable proteasome subunit alpha type-7 OS=Saccharomyces cerevisiae (strain ATCC 204508 / S288c) GN=PRE10 PE=1 SV=2	1	8	8	8	6	8	6	8	6	8	33.3	33.3	33.3	31.536	288	288	0	1.0019	1.079	31.586	9	0	Median	1.0511	1.1425	18.885	5	0	Median	0.84366	0.72579	22.061	4	0	Median	26.4	33.3	775600000	376210000	399400000	314610000	161880000
P21243	P21243	3	3	3	Proteasome subunit alpha type-1	SCL1	>sp|P21243|PSA1_YEAST Proteasome subunit alpha type-1 OS=Saccharomyces cerevisiae (strain ATCC 204508 / S288c) GN=SCL1 PE=1 SV=1	1	3	3	3	2	3	2	3	2	3	13.1	13.1	13.1	28.001	252	252	0	1.2033	0.9626	25.465	3	0	Median	0.80108	0.90624	28.567	2	1	Median	1.3615	1.0891	17.457	2	0	Median	7.9	13.1	310400000	153680000	156730000	161330000	88091000
P21264	P21264	12	12	12	Phosphoribosylaminoimidazole carboxylase	ADE2	>sp|P21264|PUR6_YEAST Phosphoribosylaminoimidazole carboxylase OS=Saccharomyces cerevisiae (strain ATCC 204508 / S288c) GN=ADE2 PE=1 SV=1	1	12	12	12	10	10	10	10	10	10	23.6	23.6	23.6	62.339	571	571	0	1.1755	1.0834	33.981	19	0	Median	0.87041	0.98572	40.725	10	0	Median	1.4152	1.1607	25.804	9	0	Median	21	19.4	1490900000	719330000	771610000	702950000	382720000
P21306	P21306	4	4	4	ATP synthase subunit epsilon, mitochondrial	ATP15	>sp|P21306|ATP5E_YEAST ATP synthase subunit epsilon, mitochondrial OS=Saccharomyces cerevisiae (strain ATCC 204508 / S288c) GN=ATP15 PE=1 SV=2	1	4	4	4	2	4	2	4	2	4	62.9	62.9	62.9	6.7425	62	62	0	1.0912	0.93612	56.54	5	0	Median	1.2125	1.3729	18.631	2	0	Median	0.72765	0.57463	44.424	3	0	Median	38.7	62.9	541430000	270200000	271230000	215680000	93880000
P21576	P21576	6	6	6	Vacuolar protein sorting-associated protein 1	VPS1	>sp|P21576|VPS1_YEAST Vacuolar protein sorting-associated protein 1 OS=Saccharomyces cerevisiae (strain ATCC 204508 / S288c) GN=VPS1 PE=1 SV=2	1	6	6	6	4	4	4	4	4	4	8.7	8.7	8.7	78.736	704	704	0	1.3362	1.0633	37.361	5	0	Median	0.65845	0.76681	22.135	5	3	Median	1.3666	1.104	23.715	3	0	Median	6	5.4	574370000	268340000	306030000	195890000	108250000
P21771	P21771	6	6	6	37S ribosomal protein S28, mitochondrial	MRPS28	>sp|P21771|RT28_YEAST 37S ribosomal protein S28, mitochondrial OS=Saccharomyces cerevisiae (strain ATCC 204508 / S288c) GN=MRPS28 PE=1 SV=1	1	6	6	6	5	3	5	3	5	3	25.9	25.9	25.9	33.057	286	286	0	1.0075	1.065	52.598	5	0	Median	0.89303	0.98828	52.379	3	0	Median	1.5941	1.3942	33.724	2	0	Median	22	14.7	336170000	186910000	149260000	281690000	166070000
P21801	P21801	18	18	18	Succinate dehydrogenase [ubiquinone] iron-sulfur subunit, mitochondrial	SDH2	>sp|P21801|SDHB_YEAST Succinate dehydrogenase [ubiquinone] iron-sulfur subunit, mitochondrial OS=Saccharomyces cerevisiae (strain ATCC 204508 / S288c) GN=SDH2 PE=1 SV=1	1	18	18	18	16	17	16	17	16	17	48.9	48.9	48.9	30.231	266	266	0	1.0351	1.067	53.342	43	0	Median	1.0351	1.1747	38.064	23	0	Median	0.92716	0.82054	52.83	20	0	Median	47.4	48.9	8754500000	4360900000	4393600000	4387500000	2123600000
P21825	P21825	4	4	4	Translocation protein SEC62	SEC62	>sp|P21825|SEC62_YEAST Translocation protein SEC62 OS=Saccharomyces cerevisiae (strain ATCC 204508 / S288c) GN=SEC62 PE=1 SV=2	1	4	4	4	3	4	3	4	3	4	18.6	18.6	18.6	31.346	274	274	0	0.91572	1.0467	17.803	3	0	Median	0.73212	0.82867	33.038	2	1	Median	0.91572	0.77929	232.79	3	1	Median	16.1	18.6	2107100000	1981200000	125910000	60916000	32583000
P21954	P21954	15	11	11	Isocitrate dehydrogenase [NADP], mitochondrial	IDP1	>sp|P21954|IDHP_YEAST Isocitrate dehydrogenase [NADP], mitochondrial OS=Saccharomyces cerevisiae (strain ATCC 204508 / S288c) GN=IDP1 PE=1 SV=1	1	15	11	11	14	15	11	11	11	11	40	32.2	32.2	48.19	428	428	0	0.93024	0.97689	52.422	22	0	Median	1.0865	1.2433	36.373	11	0	Median	0.8559	0.75411	40.325	11	0	Median	37.6	40	3429400000	1764400000	1665000000	1651500000	878470000
P21965	P21965	1	1	1	Protein kinase MCK1	MCK1	>sp|P21965|MCK1_YEAST Protein kinase MCK1 OS=Saccharomyces cerevisiae (strain ATCC 204508 / S288c) GN=MCK1 PE=1 SV=1	1	1	1	1	1	1	1	1	1	1	3.2	3.2	3.2	43.135	375	375	0	NaN	NaN	NaN	0	0	Median	NaN	NaN	NaN	0	0	Median	NaN	NaN	NaN	0	0	Median	3.2	3.2	0	0	0	0	0
P22133	P22133	11	11	11	Malate dehydrogenase, cytoplasmic	MDH2	>sp|P22133|MDHC_YEAST Malate dehydrogenase, cytoplasmic OS=Saccharomyces cerevisiae (strain ATCC 204508 / S288c) GN=MDH2 PE=1 SV=2	1	11	11	11	9	10	9	10	9	10	21	21	21	40.73	377	377	0	1.1666	1.0605	57.719	21	0	Median	1.1666	1.3674	65.979	11	0	Median	1.0067	0.8845	29.596	10	0	Median	20.4	21	8070400000	3966400000	4104000000	3938500000	1868300000
P22137	P22137	9	9	9	Clathrin heavy chain	CHC1	>sp|P22137|CLH_YEAST Clathrin heavy chain OS=Saccharomyces cerevisiae (strain ATCC 204508 / S288c) GN=CHC1 PE=1 SV=1	1	9	9	9	4	8	4	8	4	8	7.3	7.3	7.3	187.23	1653	1653	0	1.231	1.0786	23.62	9	0	Median	0.98375	1.1056	74.563	4	2	Median	1.231	1.0786	22.549	7	0	Median	3.2	6.5	525360000	258360000	267010000	178740000	97614000
P22138	P22138	36	36	36	DNA-directed RNA polymerase I subunit RPA135	RPA135	>sp|P22138|RPA2_YEAST DNA-directed RNA polymerase I subunit RPA135 OS=Saccharomyces cerevisiae (strain ATCC 204508 / S288c) GN=RPA135 PE=1 SV=1	1	36	36	36	34	31	34	31	34	31	32.7	32.7	32.7	135.74	1203	1203	0	0.98682	0.9601	40.897	80	0	Median	1.1421	1.3213	29.266	40	0	Median	0.85388	0.72117	24.228	40	0	Median	31.8	30	37112000000	17774000000	19338000000	18246000000	8202200000
P22139	P22139	6	6	6	DNA-directed RNA polymerases I, II, and III subunit RPABC5	RPB10	>sp|P22139|RPAB5_YEAST DNA-directed RNA polymerases I, II, and III subunit RPABC5 OS=Saccharomyces cerevisiae (strain ATCC 204508 / S288c) GN=RPB10 PE=1 SV=2	1	6	6	6	6	5	6	5	6	5	70	70	70	8.2776	70	70	0	1.1143	1.1429	63.237	19	0	Median	1.5719	1.7612	29.757	11	0	Median	0.54737	0.46398	36.074	8	0	Median	70	32.9	4240600000	2027000000	2213700000	2528600000	970130000
P22141	P22141	3	3	3	Proteasome subunit beta type-4	PRE1	>sp|P22141|PSB4_YEAST Proteasome subunit beta type-4 OS=Saccharomyces cerevisiae (strain ATCC 204508 / S288c) GN=PRE1 PE=1 SV=2	1	3	3	3	3	2	3	2	3	2	13.6	13.6	13.6	22.516	198	198	0	0.91195	0.85578	23.262	6	0	Median	0.979	1.1309	19.394	3	0	Median	0.84949	0.75349	13.075	3	0	Median	13.6	9.6	498890000	268820000	230070000	273700000	153940000
P22146	P22146	5	5	5	1,3-beta-glucanosyltransferase GAS1	GAS1	>sp|P22146|GAS1_YEAST 1,3-beta-glucanosyltransferase GAS1 OS=Saccharomyces cerevisiae (strain ATCC 204508 / S288c) GN=GAS1 PE=1 SV=2	1	5	5	5	5	4	5	4	5	4	9.8	9.8	9.8	59.582	559	559	0	0.97366	1.0409	47.3	10	0	Median	1.194	1.3531	26.094	6	0	Median	0.68113	0.56941	11.14	4	0	Median	9.8	8.1	793450000	425650000	367790000	347090000	163430000
P22203	P22203	2	2	2	V-type proton ATPase subunit E	VMA4	>sp|P22203|VATE_YEAST V-type proton ATPase subunit E OS=Saccharomyces cerevisiae (strain ATCC 204508 / S288c) GN=VMA4 PE=1 SV=4	1	2	2	2	1	2	1	2	1	2	9.9	9.9	9.9	26.471	233	233	0	0.91482	0.73998	20.437	3	0	Median	NaN	NaN	NaN	1	0	Median	1.0169	0.83897	17.755	2	0	Median	5.2	9.9	118410000	54581000	63828000	34700000	18878000
P22213	P22213	1	1	1	Protein SLY1	SLY1	>sp|P22213|SLY1_YEAST Protein SLY1 OS=Saccharomyces cerevisiae (strain ATCC 204508 / S288c) GN=SLY1 PE=1 SV=1	1	1	1	1	0	1	0	1	0	1	2.1	2.1	2.1	74.678	666	666	0.0074074	NaN	NaN	NaN	1	1	Median	NaN	NaN	NaN	0	0	Median	NaN	NaN	NaN	1	1	Median	0	2.1	21231000	11759000	9472400	0	0
P22217	P22217	3	1	1	Thioredoxin-1	TRX1	>sp|P22217|TRX1_YEAST Thioredoxin-1 OS=Saccharomyces cerevisiae (strain ATCC 204508 / S288c) GN=TRX1 PE=1 SV=3	1	3	1	1	3	3	1	1	1	1	24.3	16.5	16.5	11.235	103	103	0	1.0285	0.99042	24.677	4	0	Median	0.72666	0.80676	1.3947	2	0	Median	1.4671	1.2349	3.584	2	0	Median	24.3	24.3	461680000	227150000	234530000	215620000	121050000
P22289	P22289	2	2	2	Cytochrome b-c1 complex subunit 9	QCR9	>sp|P22289|QCR9_YEAST Cytochrome b-c1 complex subunit 9 OS=Saccharomyces cerevisiae (strain ATCC 204508 / S288c) GN=QCR9 PE=1 SV=2	1	2	2	2	2	2	2	2	2	2	19.7	19.7	19.7	7.4763	66	66	0	1.0284	1.0005	5.3587	4	0	Median	0.82304	0.97156	0.90748	2	0	Median	1.2753	1.0547	4.2274	2	0	Median	19.7	19.7	171390000	85006000	86381000	90540000	50811000
P22353	P22353	5	5	5	54S ribosomal protein L8, mitochondrial	MRPL8	>sp|P22353|RM08_YEAST 54S ribosomal protein L8, mitochondrial OS=Saccharomyces cerevisiae (strain ATCC 204508 / S288c) GN=MRPL8 PE=1 SV=4	1	5	5	5	4	5	4	5	4	5	22.7	22.7	22.7	26.945	238	238	0	1.0676	0.93736	46.156	8	0	Median	1.2249	1.3807	35.393	4	0	Median	0.87323	0.76923	34.118	4	0	Median	19.3	22.7	623760000	305400000	318360000	261670000	120460000
P22354	P22354	5	5	5	54S ribosomal protein L20, mitochondrial	MRPL20	>sp|P22354|RM20_YEAST 54S ribosomal protein L20, mitochondrial OS=Saccharomyces cerevisiae (strain ATCC 204508 / S288c) GN=MRPL20 PE=1 SV=2	1	5	5	5	5	5	5	5	5	5	16.4	16.4	16.4	22.392	195	195	0	1.1307	0.95923	33.142	6	0	Median	0.6191	0.72058	46.208	3	0	Median	1.3392	1.1462	22.412	3	0	Median	16.4	16.4	534920000	285700000	249220000	230180000	127860000
P22515	P22515	6	6	6	Ubiquitin-activating enzyme E1 1	UBA1	>sp|P22515|UBA1_YEAST Ubiquitin-activating enzyme E1 1 OS=Saccharomyces cerevisiae (strain ATCC 204508 / S288c) GN=UBA1 PE=1 SV=2	1	6	6	6	4	5	4	5	4	5	5.7	5.7	5.7	114.26	1024	1024	0	1.1551	0.91822	32.206	7	0	Median	0.72433	0.8211	31.569	3	0	Median	1.3033	1.0628	37.333	4	0	Median	4.1	4.9	334330000	165250000	169080000	143770000	69698000
P22768	P22768	16	16	16	Argininosuccinate synthase	ARG1	>sp|P22768|ASSY_YEAST Argininosuccinate synthase OS=Saccharomyces cerevisiae (strain ATCC 204508 / S288c) GN=ARG1 PE=1 SV=3	1	16	16	16	13	14	13	14	13	14	42.4	42.4	42.4	46.927	420	420	0	0.99226	0.98303	44.638	29	0	Median	0.90459	1.0388	41.531	15	0	Median	1.1456	0.96842	41.965	14	0	Median	36.7	38.6	3267300000	1515900000	1751400000	1620500000	830560000
P22803	P22803	3	3	1	Thioredoxin-2	TRX2	>sp|P22803|TRX2_YEAST Thioredoxin-2 OS=Saccharomyces cerevisiae (strain ATCC 204508 / S288c) GN=TRX2 PE=1 SV=3	1	3	3	1	3	3	3	3	1	1	24	24	16.3	11.204	104	104	0	1.0181	1.0097	19.142	8	0	Median	0.76041	0.85408	8.503	4	0	Median	1.3683	1.1717	14.011	4	0	Median	24	24	1394800000	744420000	650360000	672130000	400100000
P22943	P22943	2	2	2	12 kDa heat shock protein	HSP12	>sp|P22943|HSP12_YEAST 12 kDa heat shock protein OS=Saccharomyces cerevisiae (strain ATCC 204508 / S288c) GN=HSP12 PE=1 SV=1	1	2	2	2	1	2	1	2	1	2	11.9	11.9	11.9	11.693	109	109	0	1.2685	1.2252	46.561	4	0	Median	1.5913	1.8335	6.4301	2	0	Median	1.0507	0.85688	50.687	3	1	Median	11.9	11.9	393570000	159730000	233840000	153560000	57972000
P23180	P23180	9	9	9	Probable oxidoreductase AIM17	AIM17	>sp|P23180|AIM17_YEAST Probable oxidoreductase AIM17 OS=Saccharomyces cerevisiae (strain ATCC 204508 / S288c) GN=AIM17 PE=1 SV=2	1	9	9	9	8	8	8	8	8	8	25.2	25.2	25.2	53.134	465	465	0	1.053	1.0138	60.343	18	0	Median	1.2066	1.3686	42.716	9	0	Median	0.85405	0.75127	52.033	9	0	Median	21.9	21.5	1658800000	818110000	840660000	783470000	336050000
P23248	P23248	26	26	8	40S ribosomal protein S1-B	RPS1B	>sp|P23248|RS3A2_YEAST 40S ribosomal protein S1-B OS=Saccharomyces cerevisiae (strain ATCC 204508 / S288c) GN=RPS1B PE=1 SV=3	1	26	26	8	22	24	22	24	5	8	74.1	74.1	19.2	28.812	255	255	0	1.0346	0.97938	47.935	51	0	Median	0.89486	1.0183	51.443	23	0	Median	1.0844	0.9118	39.775	28	0	Median	70.6	66.7	15636000000	7921100000	7714400000	7974400000	4403700000
P23254	P23254	16	16	16	Transketolase 1	TKL1	>sp|P23254|TKT1_YEAST Transketolase 1 OS=Saccharomyces cerevisiae (strain ATCC 204508 / S288c) GN=TKL1 PE=1 SV=4	1	16	16	16	16	12	16	12	16	12	29	29	29	73.805	680	680	0	1.0018	1.0967	44.878	26	0	Median	0.99174	1.1205	29.907	13	0	Median	1.0179	0.88496	48.919	13	0	Median	29	20.7	1855500000	925900000	929620000	980530000	493310000
P23287	P23287	1	1	1	Serine/threonine-protein phosphatase 2B catalytic subunit A1	CNA1	>sp|P23287|PP2B1_YEAST Serine/threonine-protein phosphatase 2B catalytic subunit A1 OS=Saccharomyces cerevisiae (strain ATCC 204508 / S288c) GN=CNA1 PE=1 SV=2	1	1	1	1	1	0	1	0	1	0	2.5	2.5	2.5	63.001	553	553	0.0097879	NaN	NaN	NaN	1	0	Median	NaN	NaN	NaN	1	0	Median	NaN	NaN	NaN	0	0	Median	2.5	0	22141000	10860000	11281000	22141000	10860000
P23301;P19211	P23301	7;3	7;3	7;3	Eukaryotic translation initiation factor 5A-1	HYP2	>sp|P23301|IF5A1_YEAST Eukaryotic translation initiation factor 5A-1 OS=Saccharomyces cerevisiae (strain ATCC 204508 / S288c) GN=HYP2 PE=1 SV=3	2	7	7	7	7	6	7	6	7	6	29.9	29.9	29.9	17.114	157	157;157	0	0.98496	0.96389	52.505	16	0	Median	1.1148	1.2942	30.657	8	0	Median	0.65999	0.57697	43.092	8	0	Median	29.9	29.3	6424800000	2843700000	3581100000	3469300000	1677100000
P23337	P23337	4	1	1	Glycogen [starch] synthase isoform 1	GSY1	>sp|P23337|GYS1_YEAST Glycogen [starch] synthase isoform 1 OS=Saccharomyces cerevisiae (strain ATCC 204508 / S288c) GN=GSY1 PE=1 SV=3	1	4	1	1	1	4	0	1	0	1	4.5	2.3	2.3	80.509	708	708	0	NaN	NaN	NaN	1	0	Median	NaN	NaN	NaN	0	0	Median	NaN	NaN	NaN	1	0	Median	1.3	4.5	14532000	8904600	5627100	0	0
P23369	P23369	3	3	3	54S ribosomal protein L25, mitochondrial	MRPL25	>sp|P23369|RM25_YEAST 54S ribosomal protein L25, mitochondrial OS=Saccharomyces cerevisiae (strain ATCC 204508 / S288c) GN=MRPL25 PE=1 SV=2	1	3	3	3	2	2	2	2	2	2	15.3	15.3	15.3	18.587	157	157	0	0.76094	0.73013	30.309	4	0	Median	0.58411	0.66701	14.337	2	0	Median	1.1259	0.93912	37.146	2	0	Median	14.6	15.3	153160000	83368000	69789000	87083000	55841000
P23493	P23493	2	2	2	Mitochondrial biogenesis regulation protein 1	MBR1	>sp|P23493|MBR1_YEAST Mitochondrial biogenesis regulation protein 1 OS=Saccharomyces cerevisiae (strain ATCC 204508 / S288c) GN=MBR1 PE=1 SV=2	1	2	2	2	1	2	1	2	1	2	8.3	8.3	8.3	36.934	339	339	0	0.7585	0.79744	24.69	4	3	Median	0.7585	0.83009	5.4449	2	2	Median	0.75459	0.63245	32.552	2	1	Median	3.8	8.3	75092000	42387000	32705000	40542000	22229000
P23542	P23542	8	8	8	Aspartate aminotransferase, cytoplasmic	AAT2	>sp|P23542|AATC_YEAST Aspartate aminotransferase, cytoplasmic OS=Saccharomyces cerevisiae (strain ATCC 204508 / S288c) GN=AAT2 PE=1 SV=3	1	8	8	8	7	8	7	8	7	8	22.7	22.7	22.7	46.057	418	418	0	0.82575	0.78297	36.86	13	0	Median	0.78714	0.91068	49.037	6	0	Median	0.8328	0.72527	26.454	7	0	Median	19.4	22.7	2181000000	1183300000	997720000	1099600000	606170000
P23585	P23585	1	1	1	High-affinity glucose transporter HXT2	HXT2	>sp|P23585|HXT2_YEAST High-affinity glucose transporter HXT2 OS=Saccharomyces cerevisiae (strain ATCC 204508 / S288c) GN=HXT2 PE=1 SV=1	1	1	1	1	1	1	1	1	1	1	2	2	2	59.84	541	541	0	0.95854	0.92716	33.291	2	0	Median	NaN	NaN	NaN	1	0	Median	NaN	NaN	NaN	1	0	Median	2	2	160320000	77176000	83143000	78293000	46385000
P23594;P23595	P23594;P23595	2;2	2;2	2;2	Serine/threonine-protein phosphatase PP2A-1 catalytic subunit;Serine/threonine-protein phosphatase PP2A-2 catalytic subunit	PPH21;PPH22	>sp|P23594|PP2A1_YEAST Serine/threonine-protein phosphatase PP2A-1 catalytic subunit OS=Saccharomyces cerevisiae (strain ATCC 204508 / S288c) GN=PPH21 PE=1 SV=1;>sp|P23595|PP2A2_YEAST Serine/threonine-protein phosphatase PP2A-2 catalytic subunit OS=Sacchar	2	2	2	2	2	1	2	1	2	1	4.9	4.9	4.9	41.937	369	369;377	0	1.0332	1.0319	17.931	4	2	Median	0.80489	0.97079	4.4234	2	0	Median	1.4721	1.2252	20.082	2	2	Median	4.9	3	155630000	75702000	79928000	78804000	44059000
P23638	P23638	5	5	5	Proteasome subunit alpha type-3	PRE9	>sp|P23638|PSA3_YEAST Proteasome subunit alpha type-3 OS=Saccharomyces cerevisiae (strain ATCC 204508 / S288c) GN=PRE9 PE=1 SV=1	1	5	5	5	3	4	3	4	3	4	24.8	24.8	24.8	28.714	258	258	0	1.1718	1.2182	31.907	7	0	Median	1.1513	1.2239	18.909	3	0	Median	1.2917	1.1353	40.143	4	0	Median	15.1	19.8	299900000	150280000	149610000	144520000	79303000
P23639	P23639	4	4	4	Proteasome subunit alpha type-2	PRE8	>sp|P23639|PSA2_YEAST Proteasome subunit alpha type-2 OS=Saccharomyces cerevisiae (strain ATCC 204508 / S288c) GN=PRE8 PE=1 SV=1	1	4	4	4	3	2	3	2	3	2	21.6	21.6	21.6	27.162	250	250	0	1.3505	1.3642	25.32	4	0	Median	0.8751	1.0424	26.854	3	1	Median	1.536	1.3642	4.312	2	0	Median	13.6	11.6	162900000	74810000	88089000	125680000	59213000
P23641	P23641	10	10	10	Mitochondrial phosphate carrier protein;Mitochondrial phosphate carrier protein, N-terminally processed	MIR1	>sp|P23641|MPCP_YEAST Mitochondrial phosphate carrier protein OS=Saccharomyces cerevisiae (strain ATCC 204508 / S288c) GN=MIR1 PE=1 SV=1	1	10	10	10	7	10	7	10	7	10	34.4	34.4	34.4	32.812	311	311	0	0.84788	0.93438	29.362	20	0	Median	0.79153	0.91787	30.752	8	0	Median	1.1833	0.99732	27.665	12	0	Median	29.9	34.4	3402500000	1616700000	1785700000	1304200000	662770000
P23644	P23644	3	3	3	Mitochondrial import receptor subunit TOM40	TOM40	>sp|P23644|TOM40_YEAST Mitochondrial import receptor subunit TOM40 OS=Saccharomyces cerevisiae (strain ATCC 204508 / S288c) GN=TOM40 PE=1 SV=1	1	3	3	3	2	2	2	2	2	2	10.3	10.3	10.3	42.038	387	387	0	0.88288	0.77756	42.205	3	0	Median	0.97363	1.093	48.16	2	0	Median	1.2172	0.98351	46.138	2	1	Median	6.2	6.5	261280000	129870000	131420000	112700000	62689000
P23724	P23724	1	1	1	Proteasome subunit beta type-6	PRE7	>sp|P23724|PSB6_YEAST Proteasome subunit beta type-6 OS=Saccharomyces cerevisiae (strain ATCC 204508 / S288c) GN=PRE7 PE=1 SV=1	1	1	1	1	1	1	1	1	1	1	4.1	4.1	4.1	26.871	241	241	0	0.99084	0.96096	12.173	2	0	Median	NaN	NaN	NaN	1	0	Median	NaN	NaN	NaN	1	0	Median	4.1	4.1	354820000	178780000	176050000	181410000	102110000
P24000	P24000	16	4	4	60S ribosomal protein L24-B	RPL24B	>sp|P24000|RL24B_YEAST 60S ribosomal protein L24-B OS=Saccharomyces cerevisiae (strain ATCC 204508 / S288c) GN=RPL24B PE=1 SV=1	1	16	4	4	15	15	3	3	3	3	69.7	17.4	17.4	17.547	155	155	0	0.93379	1.0805	43.937	9	0	Median	1.2272	1.4287	34.839	5	0	Median	0.79879	0.66495	47.693	4	0	Median	69.7	69.7	2657400000	1312200000	1345100000	1433100000	644260000
P24276	P24276	11	11	11	Protein SSD1	SSD1	>sp|P24276|SSD1_YEAST Protein SSD1 OS=Saccharomyces cerevisiae (strain ATCC 204508 / S288c) GN=SSD1 PE=1 SV=1	1	11	11	11	9	8	9	8	9	8	12.5	12.5	12.5	139.95	1250	1250	0	0.63256	0.72391	68.967	17	0	Median	0.48428	0.52881	26.237	10	0	Median	2.4111	2.014	24.226	7	0	Median	8.7	10.5	1246000000	628360000	617640000	646340000	445190000
P24280	P24280	1	1	1	SEC14 cytosolic factor	SEC14	>sp|P24280|SEC14_YEAST SEC14 cytosolic factor OS=Saccharomyces cerevisiae (strain ATCC 204508 / S288c) GN=SEC14 PE=1 SV=3	1	1	1	1	1	1	1	1	1	1	4.9	4.9	4.9	34.9	304	304	0	1.1343	1.1232	28.193	2	0	Median	NaN	NaN	NaN	1	0	Median	NaN	NaN	NaN	1	0	Median	4.9	4.9	94727000	46696000	48031000	51943000	26932000
P24783	P24783	6	5	5	ATP-dependent RNA helicase DBP2	DBP2	>sp|P24783|DBP2_YEAST ATP-dependent RNA helicase DBP2 OS=Saccharomyces cerevisiae (strain ATCC 204508 / S288c) GN=DBP2 PE=1 SV=1	1	6	5	5	4	5	3	4	3	4	14.3	12.3	12.3	60.999	546	546	0	0.9166	0.89709	13.499	6	0	Median	0.83109	0.90955	10.434	3	0	Median	1.0965	0.8848	16.745	3	0	Median	9.3	12.1	133110000	70667000	62439000	83282000	49000000
P25039	P25039	4	4	4	Elongation factor G, mitochondrial	MEF1	>sp|P25039|EFGM_YEAST Elongation factor G, mitochondrial OS=Saccharomyces cerevisiae (strain ATCC 204508 / S288c) GN=MEF1 PE=1 SV=2	1	4	4	4	3	4	3	4	3	4	3.8	3.8	3.8	84.573	761	761	0	1.0418	0.98533	13.918	5	0	Median	0.93849	1.0517	9.2149	2	0	Median	1.1549	0.92754	15.822	3	0	Median	2.9	3.8	225550000	115300000	110250000	88987000	48202000
P25043	P25043	2	2	2	Proteasome subunit beta type-2	PUP1	>sp|P25043|PSB2_YEAST Proteasome subunit beta type-2 OS=Saccharomyces cerevisiae (strain ATCC 204508 / S288c) GN=PUP1 PE=1 SV=1	1	2	2	2	2	2	2	2	2	2	8.4	8.4	8.4	28.268	261	261	0	0.81769	0.69796	29.549	3	0	Median	NaN	NaN	NaN	1	0	Median	0.80556	0.69405	0.79396	2	0	Median	8.4	8.4	452660000	242660000	210000000	222200000	109950000
P25087	P25087	6	6	6	Sterol 24-C-methyltransferase	ERG6	>sp|P25087|ERG6_YEAST Sterol 24-C-methyltransferase OS=Saccharomyces cerevisiae (strain ATCC 204508 / S288c) GN=ERG6 PE=1 SV=4	1	6	6	6	5	4	5	4	5	4	23.2	23.2	23.2	43.43	383	383	0	1.1582	1.0505	45.883	13	0	Median	1.1266	1.2696	41.626	6	0	Median	1.1582	0.94318	41.178	7	0	Median	19.8	14.1	1246100000	606020000	640120000	598840000	297780000
P25293	P25293	6	6	6	Nucleosome assembly protein	NAP1	>sp|P25293|NAP1_YEAST Nucleosome assembly protein OS=Saccharomyces cerevisiae (strain ATCC 204508 / S288c) GN=NAP1 PE=1 SV=2	1	6	6	6	4	5	4	5	4	5	18.9	18.9	18.9	47.884	417	417	0	1.0168	1.0055	68.483	4	0	Median	1.3256	1.4871	35.827	4	2	Median	0.81491	0.68008	106.05	5	3	Median	14.6	16.3	723810000	390660000	333150000	290830000	125780000
P25294	P25294	1	1	1	Protein SIS1	SIS1	>sp|P25294|SIS1_YEAST Protein SIS1 OS=Saccharomyces cerevisiae (strain ATCC 204508 / S288c) GN=SIS1 PE=1 SV=1	1	1	1	1	1	1	1	1	1	1	2.6	2.6	2.6	37.59	352	352	0	0.84491	0.81224	41.404	2	0	Median	NaN	NaN	NaN	1	0	Median	NaN	NaN	NaN	1	0	Median	2.6	2.6	294840000	152110000	142730000	142020000	91087000
P25332	P25332	1	1	1	Probable ribokinase	RBK1	>sp|P25332|RBSK_YEAST Probable ribokinase OS=Saccharomyces cerevisiae (strain ATCC 204508 / S288c) GN=RBK1 PE=1 SV=2	1	1	1	1	1	1	1	1	1	1	3	3	3	36.924	333	333	0	0.61084	0.59167	50.49	2	1	Median	NaN	NaN	NaN	1	0	Median	NaN	NaN	NaN	1	1	Median	3	3	137890000	87263000	50629000	57126000	33243000
P25339	P25339	2	2	2	Pumilio homology domain family member 4	PUF4	>sp|P25339|PUF4_YEAST Pumilio homology domain family member 4 OS=Saccharomyces cerevisiae (strain ATCC 204508 / S288c) GN=PUF4 PE=1 SV=2	1	2	2	2	1	1	1	1	1	1	2.5	2.5	2.5	97.797	888	888	0.0097166	NaN	NaN	NaN	1	1	Median	NaN	NaN	NaN	1	1	Median	NaN	NaN	NaN	0	0	Median	1.5	1	9514700	4726900	4787800	9514700	4726900
P25342	P25342	1	1	1	Cell division control protein 10	CDC10	>sp|P25342|CDC10_YEAST Cell division control protein 10 OS=Saccharomyces cerevisiae (strain ATCC 204508 / S288c) GN=CDC10 PE=1 SV=1	1	1	1	1	1	1	1	1	1	1	3.7	3.7	3.7	37.024	322	322	0	0.87032	0.7714	37.163	3	0	Median	NaN	NaN	NaN	1	0	Median	0.84489	0.72329	9.1083	2	0	Median	3.7	3.7	143810000	71758000	72051000	72382000	34948000
P25345	P25345	4	4	4	Asparagine--tRNA ligase, mitochondrial	SLM5	>sp|P25345|SYNM_YEAST Asparagine--tRNA ligase, mitochondrial OS=Saccharomyces cerevisiae (strain ATCC 204508 / S288c) GN=SLM5 PE=1 SV=1	1	4	4	4	2	4	2	4	2	4	10.6	10.6	10.6	56.784	492	492	0	0.65612	0.56905	88.384	5	0	Median	1.898	2.0308	15.946	2	0	Median	0.59385	0.5216	37.665	3	0	Median	4.7	10.6	126460000	77487000	48970000	34141000	13137000
P25348	P25348	4	4	4	54S ribosomal protein L32, mitochondrial	MRPL32	>sp|P25348|RM32_YEAST 54S ribosomal protein L32, mitochondrial OS=Saccharomyces cerevisiae (strain ATCC 204508 / S288c) GN=MRPL32 PE=1 SV=1	1	4	4	4	3	4	3	4	3	4	21.9	21.9	21.9	21.437	183	183	0	0.96133	0.9327	36.174	8	0	Median	1.0048	1.0865	24.127	4	0	Median	0.91639	0.76233	43.996	4	0	Median	15.8	21.9	999370000	509540000	489830000	482700000	274200000
P25349	P25349	4	3	3	Flavoprotein-like protein YCP4	YCP4	>sp|P25349|YCP4_YEAST Flavoprotein-like protein YCP4 OS=Saccharomyces cerevisiae (strain ATCC 204508 / S288c) GN=YCP4 PE=1 SV=1	1	4	3	3	4	4	3	3	3	3	12.1	9.3	9.3	26.35	247	247	0	1.1498	1.2145	24.194	7	0	Median	0.79544	0.92205	27.805	3	0	Median	1.4655	1.2455	18.959	4	0	Median	12.1	12.1	645670000	310100000	335570000	319480000	187850000
P25372	P25372	3	3	3	Thioredoxin-3, mitochondrial	TRX3	>sp|P25372|TRX3_YEAST Thioredoxin-3, mitochondrial OS=Saccharomyces cerevisiae (strain ATCC 204508 / S288c) GN=TRX3 PE=1 SV=1	1	3	3	3	1	3	1	3	1	3	22	22	22	14.432	127	127	0	1.248	1.0154	8.0159	3	0	Median	NaN	NaN	NaN	1	0	Median	1.292	1.0163	11.336	2	0	Median	7.1	22	384270000	181480000	202790000	151930000	84192000
P25373	P25373	7	7	7	Glutaredoxin-1	GRX1	>sp|P25373|GLRX1_YEAST Glutaredoxin-1 OS=Saccharomyces cerevisiae (strain ATCC 204508 / S288c) GN=GRX1 PE=1 SV=1	1	7	7	7	6	6	6	6	6	6	81.8	81.8	81.8	12.38	110	110	0	1.0091	1.1138	42.698	13	0	Median	1.0776	1.2169	29.49	7	0	Median	0.79298	0.66012	42.113	6	0	Median	67.3	72.7	731510000	341530000	389980000	366530000	168470000
P25374	P25374	4	4	4	Cysteine desulfurase, mitochondrial	NFS1	>sp|P25374|NFS1_YEAST Cysteine desulfurase, mitochondrial OS=Saccharomyces cerevisiae (strain ATCC 204508 / S288c) GN=NFS1 PE=1 SV=2	1	4	4	4	2	2	2	2	2	2	7.8	7.8	7.8	54.466	497	497	0	0.74405	0.81635	24.379	4	0	Median	0.70901	0.81635	12.631	2	0	Median	1.0082	0.86019	39.95	2	0	Median	4	6.2	215510000	115890000	99616000	118480000	69793000
P25386	P25386	2	2	2	Intracellular protein transport protein USO1	USO1	>sp|P25386|USO1_YEAST Intracellular protein transport protein USO1 OS=Saccharomyces cerevisiae (strain ATCC 204508 / S288c) GN=USO1 PE=1 SV=2	1	2	2	2	2	1	2	1	2	1	0.9	0.9	0.9	206.45	1790	1790	0.00088968	1.1645	1.2181	14.473	3	0	Median	1.1645	1.3403	15.95	3	1	Median	NaN	NaN	NaN	1	0	Median	0.9	0.4	994300000	493660000	500640000	641170000	320260000
P25443	P25443	14	14	14	40S ribosomal protein S2	RPS2	>sp|P25443|RS2_YEAST 40S ribosomal protein S2 OS=Saccharomyces cerevisiae (strain ATCC 204508 / S288c) GN=RPS2 PE=1 SV=3	1	14	14	14	12	14	12	14	12	14	40.2	40.2	40.2	27.449	254	254	0	0.96802	0.9113	30.81	36	0	Median	0.81639	0.96579	22.178	16	0	Median	1.0429	0.86188	35.202	20	0	Median	40.2	40.2	18057000000	9422800000	8633800000	9414400000	5288200000
P25451	P25451	1	1	1	Proteasome subunit beta type-3	PUP3	>sp|P25451|PSB3_YEAST Proteasome subunit beta type-3 OS=Saccharomyces cerevisiae (strain ATCC 204508 / S288c) GN=PUP3 PE=1 SV=1	1	1	1	1	1	1	1	1	1	1	7.8	7.8	7.8	22.605	205	205	0	0.70356	0.78018	24.529	3	0	Median	0.6485	0.71652	12.037	2	0	Median	1.5758	1.2847	26.224	2	1	Median	7.8	7.8	53373000	26987000	26386000	25788000	15089000
P25491	P25491	8	8	8	Mitochondrial protein import protein MAS5	YDJ1	>sp|P25491|MAS5_YEAST Mitochondrial protein import protein MAS5 OS=Saccharomyces cerevisiae (strain ATCC 204508 / S288c) GN=YDJ1 PE=1 SV=1	1	8	8	8	8	7	8	7	8	7	17.4	17.4	17.4	44.67	409	409	0	0.92678	0.89192	54.059	11	0	Median	1.0047	1.1456	57.835	6	0	Median	0.92678	0.80964	47.054	5	0	Median	17.4	15.6	930170000	463410000	466760000	499240000	240930000
P25555	P25555	10	10	10	Single-strand telomeric DNA-binding protein GBP2	GBP2	>sp|P25555|GBP2_YEAST Single-strand telomeric DNA-binding protein GBP2 OS=Saccharomyces cerevisiae (strain ATCC 204508 / S288c) GN=GBP2 PE=1 SV=1	1	10	10	10	7	9	7	9	7	9	29.5	29.5	29.5	48.728	427	427	0	0.74412	0.63935	82.649	14	0	Median	1.6366	1.9007	33.584	6	0	Median	0.65943	0.53534	28.747	8	0	Median	19	25.5	2445400000	1260600000	1184800000	961850000	334040000
P25559	P25559	1	1	1	Sister chromatid cohesion protein DCC1	DCC1	>sp|P25559|DCC1_YEAST Sister chromatid cohesion protein DCC1 OS=Saccharomyces cerevisiae (strain ATCC 204508 / S288c) GN=DCC1 PE=1 SV=2	1	1	1	1	0	1	0	1	0	1	2.6	2.6	2.6	44.073	380	380	0.0017286	NaN	NaN	NaN	1	1	Median	NaN	NaN	NaN	0	0	Median	NaN	NaN	NaN	1	1	Median	0	2.6	1388900000	483090000	905820000	0	0
P25567	P25567	7	7	7	RNA-binding protein SRO9	SRO9	>sp|P25567|SRO9_YEAST RNA-binding protein SRO9 OS=Saccharomyces cerevisiae (strain ATCC 204508 / S288c) GN=SRO9 PE=1 SV=2	1	7	7	7	7	5	7	5	7	5	16.4	16.4	16.4	48.059	434	434	0	1.0676	1.0896	33.853	15	0	Median	1.0676	1.2341	24.756	9	0	Median	1.0586	0.86257	31.279	6	0	Median	16.4	11.5	1666100000	788710000	877420000	840940000	395120000
P25574	P25574	1	1	1	ER membrane protein complex subunit 1	EMC1	>sp|P25574|EMC1_YEAST ER membrane protein complex subunit 1 OS=Saccharomyces cerevisiae (strain ATCC 204508 / S288c) GN=EMC1 PE=1 SV=1	1	1	1	1	1	1	1	1	1	1	1.2	1.2	1.2	87.18	760	760	0	1.0262	0.99842	54.35	2	0	Median	NaN	NaN	NaN	1	0	Median	NaN	NaN	NaN	1	0	Median	1.2	1.2	27847000	13920000	13927000	12312000	7790600
P25586	P25586	1	1	1	KRR1 small subunit processome component	KRR1	>sp|P25586|KRR1_YEAST KRR1 small subunit processome component OS=Saccharomyces cerevisiae (strain ATCC 204508 / S288c) GN=KRR1 PE=1 SV=1	1	1	1	1	1	0	1	0	1	0	5.4	5.4	5.4	37.159	316	316	0	NaN	NaN	NaN	1	0	Median	NaN	NaN	NaN	1	0	Median	NaN	NaN	NaN	0	0	Median	5.4	0	109100000	47551000	61552000	109100000	47551000
P25605	P25605	9	9	9	Acetolactate synthase small subunit, mitochondrial	ILV6	>sp|P25605|ILV6_YEAST Acetolactate synthase small subunit, mitochondrial OS=Saccharomyces cerevisiae (strain ATCC 204508 / S288c) GN=ILV6 PE=1 SV=2	1	9	9	9	8	8	8	8	8	8	37.9	37.9	37.9	33.986	309	309	0	0.87981	0.97136	74.44	14	0	Median	1.3877	1.4738	58.653	8	0	Median	0.71953	0.61464	46.634	6	0	Median	32	34	2266400000	1381500000	884890000	1358500000	805000000
P25613	P25613	1	1	1	Accumulation of dyads protein 2	ADY2	>sp|P25613|ADY2_YEAST Accumulation of dyads protein 2 OS=Saccharomyces cerevisiae (strain ATCC 204508 / S288c) GN=ADY2 PE=1 SV=1	1	1	1	1	1	1	1	1	1	1	5.3	5.3	5.3	30.726	283	283	0	1.1284	1.126	10.258	2	0	Median	NaN	NaN	NaN	1	0	Median	NaN	NaN	NaN	1	0	Median	5.3	5.3	216260000	102950000	113310000	100850000	54426000
P25623	P25623	5	5	5	Suppressor of yeast profilin deletion	SYP1	>sp|P25623|SYP1_YEAST Suppressor of yeast profilin deletion OS=Saccharomyces cerevisiae (strain ATCC 204508 / S288c) GN=SYP1 PE=1 SV=3	1	5	5	5	4	5	4	5	4	5	6.6	6.6	6.6	96.136	870	870	0	1.2361	1.09	28.009	8	0	Median	0.68822	0.77144	11.461	3	0	Median	1.5646	1.2732	23.612	5	0	Median	5.5	6.6	674530000	326550000	347980000	361440000	194820000
P25626	P25626	3	3	3	54S ribosomal protein IMG1, mitochondrial	IMG1	>sp|P25626|IMG1_YEAST 54S ribosomal protein IMG1, mitochondrial OS=Saccharomyces cerevisiae (strain ATCC 204508 / S288c) GN=IMG1 PE=1 SV=1	1	3	3	3	2	2	2	2	2	2	16	16	16	19.393	169	169	0	0.74082	0.82371	29.362	3	0	Median	0.66159	0.72738	17.587	2	0	Median	1.1683	1.0339	15.427	2	1	Median	15.4	10.1	130050000	73475000	56572000	97775000	56814000
P25642	P25642	1	1	1	54S ribosomal protein IMG2, mitochondrial	IMG2	>sp|P25642|IMG2_YEAST 54S ribosomal protein IMG2, mitochondrial OS=Saccharomyces cerevisiae (strain ATCC 204508 / S288c) GN=IMG2 PE=1 SV=2	1	1	1	1	1	1	1	1	1	1	6.2	6.2	6.2	16.38	146	146	0.00090744	1.0247	0.99151	24.626	2	0	Median	NaN	NaN	NaN	1	0	Median	NaN	NaN	NaN	1	0	Median	6.2	6.2	124280000	62392000	61888000	60493000	35940000
P25644	P25644	6	6	6	DNA topoisomerase 2-associated protein PAT1	PAT1	>sp|P25644|PAT1_YEAST DNA topoisomerase 2-associated protein PAT1 OS=Saccharomyces cerevisiae (strain ATCC 204508 / S288c) GN=PAT1 PE=1 SV=4	1	6	6	6	4	6	4	6	4	6	8.4	8.4	8.4	88.51	796	796	0	1.1451	1.0899	26.3	5	0	Median	1.1008	1.236	38.724	3	1	Median	1.1451	1.0697	23.706	3	0	Median	5.8	8.4	702010000	405580000	296440000	247330000	156500000
P25694	P25694	26	26	26	Cell division control protein 48	CDC48	>sp|P25694|CDC48_YEAST Cell division control protein 48 OS=Saccharomyces cerevisiae (strain ATCC 204508 / S288c) GN=CDC48 PE=1 SV=3	1	26	26	26	23	20	23	20	23	20	29.5	29.5	29.5	91.995	835	835	0	0.94143	0.93139	45.356	40	0	Median	0.90423	1.0406	39.002	22	0	Median	1.0091	0.87686	38.338	18	0	Median	28.3	25.7	5412300000	2725600000	2686700000	2839400000	1461400000
P25719	P25719	4	4	4	Peptidyl-prolyl cis-trans isomerase C, mitochondrial	CPR3	>sp|P25719|CYPC_YEAST Peptidyl-prolyl cis-trans isomerase C, mitochondrial OS=Saccharomyces cerevisiae (strain ATCC 204508 / S288c) GN=CPR3 PE=1 SV=1	1	4	4	4	4	3	4	3	4	3	31.3	31.3	31.3	19.919	182	182	0	0.9535	1.0401	23.37	8	0	Median	0.90416	1.0401	11.258	4	0	Median	1.1085	0.92978	32.715	4	0	Median	31.3	25.3	1205800000	634550000	571290000	764230000	421260000
P26321	P26321	15	15	15	60S ribosomal protein L5	RPL5	>sp|P26321|RL5_YEAST 60S ribosomal protein L5 OS=Saccharomyces cerevisiae (strain ATCC 204508 / S288c) GN=RPL5 PE=1 SV=4	1	15	15	15	13	14	13	14	13	14	41.8	41.8	41.8	33.714	297	297	0	1.0539	0.9688	37.947	35	0	Median	0.8309	0.94391	40.538	16	0	Median	1.2041	0.9688	34.97	19	0	Median	27.9	38.7	10163000000	5010900000	5152500000	5536400000	2824500000
P26637	P26637	14	14	14	Leucine--tRNA ligase, cytoplasmic	CDC60	>sp|P26637|SYLC_YEAST Leucine--tRNA ligase, cytoplasmic OS=Saccharomyces cerevisiae (strain ATCC 204508 / S288c) GN=CDC60 PE=1 SV=1	1	14	14	14	11	11	11	11	11	11	16.4	16.4	16.4	124.14	1090	1090	0	1.2058	1.0966	27.725	26	0	Median	0.94678	1.0782	29.099	12	0	Median	1.3506	1.0966	27.097	14	0	Median	13.6	11.8	2035000000	1035300000	999700000	994330000	535830000
P26755	P26755	1	1	1	Replication factor A protein 3	RFA3	>sp|P26755|RFA3_YEAST Replication factor A protein 3 OS=Saccharomyces cerevisiae (strain ATCC 204508 / S288c) GN=RFA3 PE=1 SV=1	1	1	1	1	1	0	1	0	1	0	17.2	17.2	17.2	13.816	122	122	0.00091912	NaN	NaN	NaN	0	0	Median	NaN	NaN	NaN	0	0	Median	NaN	NaN	NaN	0	0	Median	17.2	0	0	0	0	0	0
P26783	P26783	19	19	19	40S ribosomal protein S5	RPS5	>sp|P26783|RS5_YEAST 40S ribosomal protein S5 OS=Saccharomyces cerevisiae (strain ATCC 204508 / S288c) GN=RPS5 PE=1 SV=3	1	19	19	19	19	17	19	17	19	17	47.1	47.1	47.1	25.038	225	225	0	0.98105	1.0738	49.689	46	0	Median	0.99564	1.1557	38.695	24	0	Median	0.9277	0.79463	43.985	22	0	Median	47.1	41.8	24638000000	11375000000	13264000000	13326000000	6062800000
P26784	P26784	21	21	16	60S ribosomal protein L16-A	RPL16A	>sp|P26784|RL16A_YEAST 60S ribosomal protein L16-A OS=Saccharomyces cerevisiae (strain ATCC 204508 / S288c) GN=RPL16A PE=1 SV=3	1	21	21	16	20	20	20	20	15	15	60.8	60.8	45.2	22.201	199	199	0	0.89052	0.89087	42.623	42	0	Median	0.6411	0.70175	25.136	22	0	Median	1.4865	1.2574	40.47	20	0	Median	60.8	60.8	37694000000	18108000000	19586000000	19614000000	12311000000
P26785	P26785	21	16	16	60S ribosomal protein L16-B	RPL16B	>sp|P26785|RL16B_YEAST 60S ribosomal protein L16-B OS=Saccharomyces cerevisiae (strain ATCC 204508 / S288c) GN=RPL16B PE=1 SV=3	1	21	16	16	20	20	15	15	15	15	65.2	53	53	22.249	198	198	0	0.94774	1.0723	47.096	29	0	Median	0.60422	0.65164	41.466	15	0	Median	1.4942	1.2892	31.846	14	0	Median	65.2	65.2	12707000000	6158500000	6548400000	6276500000	3702800000
P26786	P26786	27	27	10	40S ribosomal protein S7-A	RPS7A	>sp|P26786|RS7A_YEAST 40S ribosomal protein S7-A OS=Saccharomyces cerevisiae (strain ATCC 204508 / S288c) GN=RPS7A PE=1 SV=4	1	27	27	10	25	25	25	25	10	8	77.9	77.9	42.1	21.622	190	190	0	1.0284	1.0476	38.024	53	0	Median	0.89952	1.041	34.813	27	0	Median	1.2497	1.08	41.727	26	0	Median	76.3	77.9	28198000000	13321000000	14877000000	13997000000	7414900000
P27472	P27472	6	6	3	Glycogen [starch] synthase isoform 2	GSY2	>sp|P27472|GYS2_YEAST Glycogen [starch] synthase isoform 2 OS=Saccharomyces cerevisiae (strain ATCC 204508 / S288c) GN=GSY2 PE=1 SV=3	1	6	6	3	3	6	3	6	2	3	7	7	4.7	80.078	705	705	0	1.1037	1.016	18.046	6	0	Median	1.0638	1.2306	11.799	4	2	Median	1.1296	0.97431	13.201	4	0	Median	6	7	624940000	311730000	313210000	215090000	107840000
P27476	P27476	26	26	26	Nuclear localization sequence-binding protein	NSR1	>sp|P27476|NSR1_YEAST Nuclear localization sequence-binding protein OS=Saccharomyces cerevisiae (strain ATCC 204508 / S288c) GN=NSR1 PE=1 SV=1	1	26	26	26	25	23	25	23	25	23	43.7	43.7	43.7	44.535	414	414	0	0.84061	0.69564	105.85	65	0	Median	2.3187	2.5855	45.752	31	0	Median	0.44947	0.37163	40.765	34	0	Median	43.7	36.5	25430000000	12001000000	13430000000	13822000000	4473300000
P27614	P27614	5	5	5	Carboxypeptidase S	CPS1	>sp|P27614|CBPS_YEAST Carboxypeptidase S OS=Saccharomyces cerevisiae (strain ATCC 204508 / S288c) GN=CPS1 PE=1 SV=2	1	5	5	5	4	4	4	4	4	4	9	9	9	64.596	576	576	0	1.149	0.97964	28.079	7	0	Median	0.85257	0.97964	40.833	3	0	Median	1.1782	0.92635	19.425	4	0	Median	7.5	6.8	325680000	167680000	158000000	139430000	82807000
P27616	P27616	5	5	5	Phosphoribosylaminoimidazole-succinocarboxamide synthase	ADE1	>sp|P27616|PUR7_YEAST Phosphoribosylaminoimidazole-succinocarboxamide synthase OS=Saccharomyces cerevisiae (strain ATCC 204508 / S288c) GN=ADE1 PE=1 SV=2	1	5	5	5	5	2	5	2	5	2	16	16	16	34.603	306	306	0	0.74264	0.82043	21.542	6	0	Median	0.71007	0.82043	15.964	4	0	Median	1.1452	0.98369	27.751	2	0	Median	16	6.9	164200000	95231000	68970000	106080000	65371000
P27680	P27680	1	1	1	Hexaprenyldihydroxybenzoate methyltransferase, mitochondrial	COQ3	>sp|P27680|COQ3_YEAST Hexaprenyldihydroxybenzoate methyltransferase, mitochondrial OS=Saccharomyces cerevisiae (strain ATCC 204508 / S288c) GN=COQ3 PE=1 SV=2	1	1	1	1	1	1	1	1	1	1	4.2	4.2	4.2	36.33	312	312	0	0.97425	0.93671	21.712	2	0	Median	NaN	NaN	NaN	1	0	Median	NaN	NaN	NaN	1	0	Median	4.2	4.2	24311000	12157000	12154000	11187000	6213000
P27692	P27692	2	2	2	Transcription elongation factor SPT5	SPT5	>sp|P27692|SPT5_YEAST Transcription elongation factor SPT5 OS=Saccharomyces cerevisiae (strain ATCC 204508 / S288c) GN=SPT5 PE=1 SV=1	1	2	2	2	2	1	2	1	2	1	1.9	1.9	1.9	115.65	1063	1063	0	0.94081	1.0444	20.016	3	0	Median	0.88255	1.0314	1.7748	2	0	Median	NaN	NaN	NaN	1	0	Median	1.9	0.8	263070000	112770000	150300000	125760000	63551000
P27796	P27796	2	2	2	3-ketoacyl-CoA thiolase, peroxisomal	POT1	>sp|P27796|THIK_YEAST 3-ketoacyl-CoA thiolase, peroxisomal OS=Saccharomyces cerevisiae (strain ATCC 204508 / S288c) GN=POT1 PE=1 SV=1	1	2	2	2	2	0	2	0	2	0	8.4	8.4	8.4	44.73	417	417	0	1.0259	1.1417	67.363	2	1	Median	1.0259	1.1417	67.363	2	1	Median	NaN	NaN	NaN	0	0	Median	8.4	0	23211000	11170000	12041000	23211000	11170000
P27810	P27810	1	1	1	Alpha-1,2 mannosyltransferase KTR1	KTR1	>sp|P27810|KTR1_YEAST Alpha-1,2 mannosyltransferase KTR1 OS=Saccharomyces cerevisiae (strain ATCC 204508 / S288c) GN=KTR1 PE=1 SV=1	1	1	1	1	1	1	1	1	1	1	2	2	2	46.022	393	393	0.0017483	NaN	NaN	NaN	1	0	Median	NaN	NaN	NaN	0	0	Median	NaN	NaN	NaN	1	0	Median	2	2	48137000	22169000	25969000	0	0
P27929	P27929	2	2	2	37S ribosomal protein NAM9, mitochondrial	NAM9	>sp|P27929|NAM9_YEAST 37S ribosomal protein NAM9, mitochondrial OS=Saccharomyces cerevisiae (strain ATCC 204508 / S288c) GN=NAM9 PE=1 SV=2	1	2	2	2	2	2	2	2	2	2	3.7	3.7	3.7	56.355	486	486	0	0.92633	0.94766	63.735	3	0	Median	0.91518	0.96756	2.9392	2	1	Median	1.0099	0.91535	90.09	2	0	Median	3.7	3.7	91727000	41142000	50586000	49714000	24763000
P28000	P28000	13	13	13	DNA-directed RNA polymerases I and III subunit RPAC2	RPC19	>sp|P28000|RPAC2_YEAST DNA-directed RNA polymerases I and III subunit RPAC2 OS=Saccharomyces cerevisiae (strain ATCC 204508 / S288c) GN=RPC19 PE=1 SV=1	1	13	13	13	11	10	11	10	11	10	78.9	78.9	78.9	16.151	142	142	0	0.96087	0.95318	40.879	23	0	Median	1.092	1.2042	28.176	12	0	Median	0.73253	0.62964	22.653	11	0	Median	76.1	38	6640700000	3649000000	2991800000	3660400000	2082900000
P28006	P28006	1	1	1	Serine/threonine-protein phosphatase 1 regulatory subunit GAC1	GAC1	>sp|P28006|GAC1_YEAST Serine/threonine-protein phosphatase 1 regulatory subunit GAC1 OS=Saccharomyces cerevisiae (strain ATCC 204508 / S288c) GN=GAC1 PE=1 SV=2	1	1	1	1	0	1	0	1	0	1	1.5	1.5	1.5	88.532	793	793	0	NaN	NaN	NaN	1	0	Median	NaN	NaN	NaN	0	0	Median	NaN	NaN	NaN	1	0	Median	0	1.5	19280000	8262300	11018000	0	0
P28007	P28007	2	2	2	H/ACA ribonucleoprotein complex subunit 1	GAR1	>sp|P28007|GAR1_YEAST H/ACA ribonucleoprotein complex subunit 1 OS=Saccharomyces cerevisiae (strain ATCC 204508 / S288c) GN=GAR1 PE=1 SV=1	1	2	2	2	1	1	1	1	1	1	14.1	14.1	14.1	21.48	205	205	0	0.5097	0.52438	62.242	2	2	Median	NaN	NaN	NaN	1	1	Median	NaN	NaN	NaN	1	1	Median	5.4	8.8	87770000	56636000	31134000	70869000	49559000
P28240	P28240	33	33	33	Isocitrate lyase	ICL1	>sp|P28240|ACEA_YEAST Isocitrate lyase OS=Saccharomyces cerevisiae (strain ATCC 204508 / S288c) GN=ICL1 PE=1 SV=1	1	33	33	33	32	30	32	30	32	30	59.6	59.6	59.6	62.408	557	557	0	0.94785	1.0332	47.523	99	0	Median	1.1376	1.2731	39.996	53	0	Median	0.87988	0.70144	39.697	46	0	Median	58.3	53.5	28221000000	14041000000	14179000000	13652000000	6309300000
P28241	P28241	10	10	10	Isocitrate dehydrogenase [NAD] subunit 2, mitochondrial	IDH2	>sp|P28241|IDH2_YEAST Isocitrate dehydrogenase [NAD] subunit 2, mitochondrial OS=Saccharomyces cerevisiae (strain ATCC 204508 / S288c) GN=IDH2 PE=1 SV=1	1	10	10	10	9	10	9	10	9	10	28.5	28.5	28.5	39.739	369	369	0	1.0065	0.90376	33.108	15	0	Median	1.3244	1.4534	33.162	7	0	Median	1.0021	0.87061	17.506	8	0	Median	25.2	28.5	1661900000	814690000	847240000	825260000	410720000
P28272	P28272	4	4	4	Dihydroorotate dehydrogenase (fumarate)	URA1	>sp|P28272|PYRD_YEAST Dihydroorotate dehydrogenase (fumarate) OS=Saccharomyces cerevisiae (strain ATCC 204508 / S288c) GN=URA1 PE=1 SV=1	1	4	4	4	4	2	4	2	4	2	14.6	14.6	14.6	34.801	314	314	0	1.0079	1.1364	58.571	5	0	Median	1.0079	1.1364	30.38	3	0	Median	0.75835	0.64253	84.777	2	0	Median	14.6	4.8	658150000	179520000	478630000	499050000	118640000
P28274	P28274	1	1	1	CTP synthase 1	URA7	>sp|P28274|URA7_YEAST CTP synthase 1 OS=Saccharomyces cerevisiae (strain ATCC 204508 / S288c) GN=URA7 PE=1 SV=2	1	1	1	1	1	1	1	1	1	1	1.9	1.9	1.9	64.71	579	579	0	1.0826	1.0466	29.572	2	0	Median	NaN	NaN	NaN	1	0	Median	NaN	NaN	NaN	1	0	Median	1.9	1.9	218240000	103220000	115020000	117720000	54226000
P28495	P28495	2	2	2	F-actin-capping protein subunit alpha	CAP1	>sp|P28495|CAPZA_YEAST F-actin-capping protein subunit alpha OS=Saccharomyces cerevisiae (strain ATCC 204508 / S288c) GN=CAP1 PE=1 SV=1	1	2	2	2	1	1	1	1	1	1	8.6	8.6	8.6	30.699	268	268	0	1.7818	1.7009	48.951	2	0	Median	NaN	NaN	NaN	1	0	Median	NaN	NaN	NaN	1	0	Median	4.9	3.7	28931000	11258000	17674000	14825000	4113600
P28737	P28737	1	1	1	Protein MSP1	MSP1	>sp|P28737|MSP1_YEAST Protein MSP1 OS=Saccharomyces cerevisiae (strain ATCC 204508 / S288c) GN=MSP1 PE=1 SV=2	1	1	1	1	1	0	1	0	1	0	4.7	4.7	4.7	40.343	362	362	0	NaN	NaN	NaN	1	1	Median	NaN	NaN	NaN	1	1	Median	NaN	NaN	NaN	0	0	Median	4.7	0	18508000	9551300	8956300	18508000	9551300
P28777	P28777	8	8	8	Chorismate synthase	ARO2	>sp|P28777|AROC_YEAST Chorismate synthase OS=Saccharomyces cerevisiae (strain ATCC 204508 / S288c) GN=ARO2 PE=1 SV=1	1	8	8	8	5	7	5	7	5	7	28.2	28.2	28.2	40.838	376	376	0	0.92903	1.0011	29.745	9	0	Median	0.96694	1.1138	29.492	4	0	Median	0.92903	0.81284	27.061	5	0	Median	14.6	25.5	1378100000	749240000	628900000	661570000	390730000
P28778	P28778	2	2	2	37S ribosomal protein MRP17, mitochondrial	MRP17	>sp|P28778|RT06_YEAST 37S ribosomal protein MRP17, mitochondrial OS=Saccharomyces cerevisiae (strain ATCC 204508 / S288c) GN=MRP17 PE=1 SV=1	1	2	2	2	1	2	1	2	1	2	19.1	19.1	19.1	15.02	131	131	0	0.97442	0.8652	14.393	3	1	Median	NaN	NaN	NaN	1	0	Median	1.0989	0.95463	13.91	2	1	Median	9.9	19.1	260980000	131880000	129100000	86223000	49495000
P28789	P28789	2	2	2	Porphobilinogen deaminase	HEM3	>sp|P28789|HEM3_YEAST Porphobilinogen deaminase OS=Saccharomyces cerevisiae (strain ATCC 204508 / S288c) GN=HEM3 PE=1 SV=1	1	2	2	2	1	2	1	2	1	2	8.9	8.9	8.9	36.674	327	327	0	0.91186	0.89484	16.867	3	1	Plateau	NaN	NaN	NaN	1	0	Median	0.85612	0.77145	0.66766	2	1	Median	3.4	8.9	84621000	45933000	38687000	34370000	20935000
P28834	P28834	16	16	16	Isocitrate dehydrogenase [NAD] subunit 1, mitochondrial	IDH1	>sp|P28834|IDH1_YEAST Isocitrate dehydrogenase [NAD] subunit 1, mitochondrial OS=Saccharomyces cerevisiae (strain ATCC 204508 / S288c) GN=IDH1 PE=1 SV=2	1	16	16	16	16	14	16	14	16	14	45.3	45.3	45.3	39.324	360	360	0	1.0201	1.0313	39.822	39	0	Median	1.0049	1.1174	30.972	20	0	Median	1.041	0.8595	41.363	19	0	Median	45.3	39.4	4075700000	1991600000	2084100000	2148300000	1057600000
P29295	P29295	1	1	1	Casein kinase I homolog HRR25	HRR25	>sp|P29295|HRR25_YEAST Casein kinase I homolog HRR25 OS=Saccharomyces cerevisiae (strain ATCC 204508 / S288c) GN=HRR25 PE=1 SV=1	1	1	1	1	0	1	0	1	0	1	3	3	3	57.339	494	494	0	NaN	NaN	NaN	1	0	Median	NaN	NaN	NaN	0	0	Median	NaN	NaN	NaN	1	0	Median	0	3	10969000	6491500	4477300	0	0
P29311	P29311	11	2	2	Protein BMH1	BMH1	>sp|P29311|BMH1_YEAST Protein BMH1 OS=Saccharomyces cerevisiae (strain ATCC 204508 / S288c) GN=BMH1 PE=1 SV=4	1	11	2	2	10	10	1	2	1	2	41.9	9	9	30.091	267	267	0	1.1095	1.1072	16.558	2	0	Median	NaN	NaN	NaN	1	0	Median	NaN	NaN	NaN	1	0	Median	38.2	33.3	694020000	345250000	348770000	319050000	160510000
P29453	P29453	28	6	6	60S ribosomal protein L8-B	RPL8B	>sp|P29453|RL8B_YEAST 60S ribosomal protein L8-B OS=Saccharomyces cerevisiae (strain ATCC 204508 / S288c) GN=RPL8B PE=1 SV=3	1	28	6	6	27	25	6	6	6	6	77	15.6	15.6	28.111	256	256	0	1.0019	0.98597	61.701	13	0	Median	1.0615	1.2397	52.724	5	0	Median	0.95134	0.79879	52.248	8	0	Median	76.6	67.2	4788600000	2103000000	2685600000	2535800000	1228300000
P29478	P29478	2	2	2	Signal recognition particle subunit SEC65	SEC65	>sp|P29478|SEC65_YEAST Signal recognition particle subunit SEC65 OS=Saccharomyces cerevisiae (strain ATCC 204508 / S288c) GN=SEC65 PE=1 SV=1	1	2	2	2	2	2	2	2	2	2	8.4	8.4	8.4	31.169	273	273	0	1.2551	1.1003	23.726	5	3	Median	0.68461	0.75797	16.651	2	1	Median	1.3722	1.167	2.958	3	2	Plateau	8.4	8.4	97819000	48972000	48847000	40415000	24087000
P29509	P29509	4	4	4	Thioredoxin reductase 1	TRR1	>sp|P29509|TRXB1_YEAST Thioredoxin reductase 1 OS=Saccharomyces cerevisiae (strain ATCC 204508 / S288c) GN=TRR1 PE=1 SV=3	1	4	4	4	3	4	3	4	3	4	24.5	24.5	24.5	34.238	319	319	0	1.3921	1.1723	66.863	5	0	Median	1.374	1.6076	29.561	4	2	Median	0.81299	0.69114	47.554	3	0	Median	19.7	24.5	347260000	157940000	189320000	160090000	71425000
P29547	P29547	3	1	1	Elongation factor 1-gamma 1	CAM1	>sp|P29547|EF1G1_YEAST Elongation factor 1-gamma 1 OS=Saccharomyces cerevisiae (strain ATCC 204508 / S288c) GN=CAM1 PE=1 SV=2	1	3	1	1	3	3	1	1	1	1	5.5	3.1	3.1	47.087	415	415	0	0.93923	0.91169	15.6	2	0	Median	NaN	NaN	NaN	1	0	Median	NaN	NaN	NaN	1	0	Median	5.5	5.5	203170000	101380000	101780000	107900000	58957000
P29952	P29952	5	5	5	Mannose-6-phosphate isomerase	PMI40	>sp|P29952|MPI_YEAST Mannose-6-phosphate isomerase OS=Saccharomyces cerevisiae (strain ATCC 204508 / S288c) GN=PMI40 PE=1 SV=4	1	5	5	5	5	3	5	3	5	3	11.2	11.2	11.2	48.188	429	429	0	0.88204	0.97332	27.135	7	0	Median	0.88204	0.97332	24.709	5	0	Median	1.6068	1.2621	23.92	4	2	Linear	11.2	6.8	560650000	287590000	273060000	319190000	172380000
P30624	P30624	8	8	8	Long-chain-fatty-acid--CoA ligase 1	FAA1	>sp|P30624|LCF1_YEAST Long-chain-fatty-acid--CoA ligase 1 OS=Saccharomyces cerevisiae (strain ATCC 204508 / S288c) GN=FAA1 PE=1 SV=1	1	8	8	8	5	7	5	7	5	7	14.7	14.7	14.7	77.865	700	700	0	0.90515	0.92874	27.837	8	0	Median	0.6437	0.73981	18.515	4	0	Median	1.3533	1.1558	17.756	4	0	Median	7.1	13.1	1808700000	915280000	893440000	993160000	552670000
P30656	P30656	2	2	2	Proteasome subunit beta type-5	PRE2	>sp|P30656|PSB5_YEAST Proteasome subunit beta type-5 OS=Saccharomyces cerevisiae (strain ATCC 204508 / S288c) GN=PRE2 PE=1 SV=3	1	2	2	2	2	2	2	2	2	2	8	8	8	31.636	287	287	0	0.97256	0.91228	25.809	4	0	Median	0.71516	0.81898	22.607	2	0	Median	1.3014	1.0604	28.631	2	0	Median	8	8	234820000	122250000	112570000	119460000	66123000
P30665	P30665	2	2	2	DNA replication licensing factor MCM4	MCM4	>sp|P30665|MCM4_YEAST DNA replication licensing factor MCM4 OS=Saccharomyces cerevisiae (strain ATCC 204508 / S288c) GN=MCM4 PE=1 SV=2	1	2	2	2	2	2	2	2	2	2	2.9	2.9	2.9	105	933	933	0	1.0324	0.96574	20.355	3	1	Median	0.84852	0.93339	28.652	2	1	Median	NaN	NaN	NaN	1	0	Median	2.9	2.9	87445000	42775000	44670000	52111000	26911000
P30771	P30771	3	3	3	ATP-dependent helicase NAM7	NAM7	>sp|P30771|NAM7_YEAST ATP-dependent helicase NAM7 OS=Saccharomyces cerevisiae (strain ATCC 204508 / S288c) GN=NAM7 PE=1 SV=1	1	3	3	3	2	2	2	2	2	2	4.1	4.1	4.1	109.43	971	971	0	0.95139	0.89636	65.306	4	2	Median	0.51079	0.57629	41.897	2	1	Median	1.7288	1.4624	48.654	2	1	Median	2.6	3.2	56718000	26322000	30396000	34003000	17477000
P30822	P30822	3	3	3	Exportin-1	CRM1	>sp|P30822|XPO1_YEAST Exportin-1 OS=Saccharomyces cerevisiae (strain ATCC 204508 / S288c) GN=CRM1 PE=1 SV=1	1	3	3	3	3	2	3	2	3	2	2.8	2.8	2.8	124.1	1084	1084	0	0.77998	0.78844	31.774	4	2	Median	0.6913	0.78844	8.8685	2	1	Median	1.1936	1.0131	48.181	2	1	Median	2.8	2	459000000	231140000	227860000	221580000	129530000
P30902	P30902	9	9	9	ATP synthase subunit d, mitochondrial	ATP7	>sp|P30902|ATP7_YEAST ATP synthase subunit d, mitochondrial OS=Saccharomyces cerevisiae (strain ATCC 204508 / S288c) GN=ATP7 PE=1 SV=2	1	9	9	9	7	7	7	7	7	7	47.1	47.1	47.1	19.809	174	174	0	1.0955	1.0161	52.651	14	0	Median	1.3164	1.4585	43.676	8	0	Median	0.89706	0.73168	29.84	6	0	Median	33.3	42.5	2641000000	1378600000	1262400000	1240900000	583720000
P30952;P21826;REV__Q08347	P30952	29;7;1	29;7;1	29;7;1	Malate synthase 1, glyoxysomal	MLS1	>sp|P30952|MASY_YEAST Malate synthase 1, glyoxysomal OS=Saccharomyces cerevisiae (strain ATCC 204508 / S288c) GN=MLS1 PE=1 SV=1	3	29	29	29	26	27	26	27	26	27	43.5	43.5	43.5	62.79	554	554;554;646	0	1.0695	1.0107	41.802	65	0	Median	0.96908	1.1057	37.598	33	0	Median	1.1613	0.94424	36.297	32	0	Median	37.9	42.4	43418000000	20836000000	22582000000	30278000000	14718000000
P31116	P31116	13	13	13	Homoserine dehydrogenase	HOM6	>sp|P31116|DHOM_YEAST Homoserine dehydrogenase OS=Saccharomyces cerevisiae (strain ATCC 204508 / S288c) GN=HOM6 PE=1 SV=1	1	13	13	13	12	10	12	10	12	10	36.8	36.8	36.8	38.502	359	359	0	0.93377	1.0347	37.209	19	0	Median	0.90818	1.0645	31.204	10	0	Median	1.0289	0.87031	42.836	9	0	Median	36.8	27	4350300000	2180100000	2170200000	2423900000	1133200000
P31334	P31334	1	1	1	54S ribosomal protein L9, mitochondrial	MRPL9	>sp|P31334|RM09_YEAST 54S ribosomal protein L9, mitochondrial OS=Saccharomyces cerevisiae (strain ATCC 204508 / S288c) GN=MRPL9 PE=1 SV=3	1	1	1	1	1	0	1	0	1	0	3	3	3	29.79	269	269	0.0066556	NaN	NaN	NaN	1	0	Median	NaN	NaN	NaN	1	0	Median	NaN	NaN	NaN	0	0	Median	3	0	50150000	31949000	18201000	50150000	31949000
P31373	P31373	5	5	5	Cystathionine gamma-lyase	CYS3	>sp|P31373|CYS3_YEAST Cystathionine gamma-lyase OS=Saccharomyces cerevisiae (strain ATCC 204508 / S288c) GN=CYS3 PE=1 SV=2	1	5	5	5	5	4	5	4	5	4	15	15	15	42.542	394	394	0	1.2093	1.0718	23.453	10	0	Median	1.0638	1.2261	25.907	5	0	Median	1.2556	1.0575	22.079	5	0	Median	15	12.2	2264700000	1033800000	1230900000	1109900000	532490000
P31382	P31382	2	2	2	Dolichyl-phosphate-mannose--protein mannosyltransferase 2	PMT2	>sp|P31382|PMT2_YEAST Dolichyl-phosphate-mannose--protein mannosyltransferase 2 OS=Saccharomyces cerevisiae (strain ATCC 204508 / S288c) GN=PMT2 PE=1 SV=2	1	2	2	2	2	2	2	2	2	2	3	3	3	86.869	759	759	0	0.83242	0.96799	18.268	4	2	Linear	0.73463	0.8147	17.774	2	1	Median	1.0161	0.8237	26.154	2	1	Median	3	3	542720000	268940000	273780000	248820000	134230000
P31383	P31383	2	2	2	Protein phosphatase PP2A regulatory subunit A	TPD3	>sp|P31383|2AAA_YEAST Protein phosphatase PP2A regulatory subunit A OS=Saccharomyces cerevisiae (strain ATCC 204508 / S288c) GN=TPD3 PE=1 SV=3	1	2	2	2	2	1	2	1	2	1	3	3	3	70.907	635	635	0	1.1345	0.95904	18.638	3	1	Median	0.97275	1.1217	22.16	2	1	Median	NaN	NaN	NaN	1	0	Median	3	1.7	300240000	144700000	155540000	238530000	118370000
P31412	P31412	4	4	4	V-type proton ATPase subunit C	VMA5	>sp|P31412|VATC_YEAST V-type proton ATPase subunit C OS=Saccharomyces cerevisiae (strain ATCC 204508 / S288c) GN=VMA5 PE=1 SV=4	1	4	4	4	4	3	4	3	4	3	10.5	10.5	10.5	44.188	392	392	0	1.0639	1.0664	30.192	4	0	Median	1.0997	1.2461	74.323	4	2	Median	0.98745	0.87181	124.42	4	2	Median	10.5	7.9	371200000	169900000	201300000	143740000	57585000
P31539	P31539	43	43	43	Heat shock protein 104	HSP104	>sp|P31539|HS104_YEAST Heat shock protein 104 OS=Saccharomyces cerevisiae (strain ATCC 204508 / S288c) GN=HSP104 PE=1 SV=2	1	43	43	43	36	37	36	37	36	37	43.8	43.8	43.8	102.03	908	908	0	0.95473	0.96259	51.953	74	0	Median	0.98676	1.0542	41.13	37	0	Median	0.90258	0.77963	45.483	37	0	Median	39.1	39.1	9086600000	4594900000	4491700000	4484200000	2239600000
P31688	P31688	8	8	8	Trehalose-phosphatase	TPS2	>sp|P31688|TPS2_YEAST Trehalose-phosphatase OS=Saccharomyces cerevisiae (strain ATCC 204508 / S288c) GN=TPS2 PE=1 SV=3	1	8	8	8	6	7	6	7	6	7	9.2	9.2	9.2	102.98	896	896	0	0.96337	0.89355	42.254	13	0	Median	0.8488	0.95034	44.462	6	0	Median	1.0331	0.86965	39.316	7	0	Median	6.2	8.1	849020000	425060000	423960000	390780000	203020000
P32048	P32048	2	2	2	Lysine--tRNA ligase, mitochondrial	MSK1	>sp|P32048|SYKM_YEAST Lysine--tRNA ligase, mitochondrial OS=Saccharomyces cerevisiae (strain ATCC 204508 / S288c) GN=MSK1 PE=1 SV=3	1	2	2	2	1	2	1	2	1	2	4	4	4	66.127	576	576	0	1.0212	0.91085	15.283	3	0	Median	NaN	NaN	NaN	1	0	Median	1.1969	0.95689	21.234	2	0	Median	1.2	4	434330000	205790000	228550000	239980000	127540000
P32074	P32074	3	3	3	Coatomer subunit gamma	SEC21	>sp|P32074|COPG_YEAST Coatomer subunit gamma OS=Saccharomyces cerevisiae (strain ATCC 204508 / S288c) GN=SEC21 PE=1 SV=2	1	3	3	3	3	1	3	1	3	1	4.1	4.1	4.1	104.83	935	935	0	0.99894	1.1172	37.5	4	0	Median	1.0104	1.1581	19.572	3	0	Median	NaN	NaN	NaN	1	0	Median	4.1	1.9	253190000	119640000	133550000	172810000	74477000
P32178	P32178	3	3	3	Chorismate mutase	ARO7	>sp|P32178|CHMU_YEAST Chorismate mutase OS=Saccharomyces cerevisiae (strain ATCC 204508 / S288c) GN=ARO7 PE=1 SV=1	1	3	3	3	1	3	1	3	1	3	12.1	12.1	12.1	29.747	256	256	0	1.1349	1.1026	43.543	4	4	Median	NaN	NaN	NaN	1	1	Median	1.4285	1.2712	49.639	3	3	Median	3.9	12.1	129880000	60969000	68909000	46170000	25948000
P32190	P32190	2	2	2	Glycerol kinase	GUT1	>sp|P32190|GLPK_YEAST Glycerol kinase OS=Saccharomyces cerevisiae (strain ATCC 204508 / S288c) GN=GUT1 PE=3 SV=1	1	2	2	2	2	2	2	2	2	2	3.5	3.5	3.5	79.823	709	709	0	1.0353	0.97121	25.594	4	2	Median	0.71515	0.76347	31.17	2	1	Median	1.2004	1.0389	6.6666	2	1	Median	3.5	3.5	136320000	63498000	72818000	59678000	30608000
P32191	P32191	11	11	11	Glycerol-3-phosphate dehydrogenase, mitochondrial	GUT2	>sp|P32191|GPDM_YEAST Glycerol-3-phosphate dehydrogenase, mitochondrial OS=Saccharomyces cerevisiae (strain ATCC 204508 / S288c) GN=GUT2 PE=1 SV=2	1	11	11	11	7	8	7	8	7	8	19.4	19.4	19.4	72.388	649	649	0	0.93103	0.94124	21.632	12	0	Median	0.82057	0.93027	22.382	7	0	Median	1.1479	0.98458	19.855	5	0	Median	12.6	13.1	631510000	286760000	344750000	297440000	149430000
P32263	P32263	1	1	1	Pyrroline-5-carboxylate reductase	PRO3	>sp|P32263|P5CR_YEAST Pyrroline-5-carboxylate reductase OS=Saccharomyces cerevisiae (strain ATCC 204508 / S288c) GN=PRO3 PE=1 SV=1	1	1	1	1	1	0	1	0	1	0	4.5	4.5	4.5	30.131	286	286	0	NaN	NaN	NaN	1	1	Median	NaN	NaN	NaN	1	1	Median	NaN	NaN	NaN	0	0	Median	4.5	0	53775000	19840000	33935000	53775000	19840000
P32264	P32264	1	1	1	Glutamate 5-kinase	PRO1	>sp|P32264|PROB_YEAST Glutamate 5-kinase OS=Saccharomyces cerevisiae (strain ATCC 204508 / S288c) GN=PRO1 PE=1 SV=2	1	1	1	1	1	1	1	1	1	1	2.3	2.3	2.3	47.162	428	428	0	1.0602	1.0748	10.378	2	0	Median	NaN	NaN	NaN	1	0	Median	NaN	NaN	NaN	1	0	Median	2.3	2.3	105080000	52525000	52553000	56859000	30419000
P32288	P32288	6	6	6	Glutamine synthetase	GLN1	>sp|P32288|GLNA_YEAST Glutamine synthetase OS=Saccharomyces cerevisiae (strain ATCC 204508 / S288c) GN=GLN1 PE=1 SV=4	1	6	6	6	5	5	5	5	5	5	15.1	15.1	15.1	41.766	370	370	0	1.0208	1.0051	26.267	9	0	Median	1.0208	1.1635	21.269	5	0	Median	1.0292	0.9166	29.728	4	0	Median	12.7	12.7	2828300000	1352500000	1475800000	1349500000	726920000
P32316	P32316	24	24	24	Acetyl-CoA hydrolase	ACH1	>sp|P32316|ACH1_YEAST Acetyl-CoA hydrolase OS=Saccharomyces cerevisiae (strain ATCC 204508 / S288c) GN=ACH1 PE=1 SV=2	1	24	24	24	24	22	24	22	24	22	37.6	37.6	37.6	58.711	526	526	0	1.0268	0.9646	43.835	64	0	Median	1.0882	1.237	33.746	29	0	Median	0.96978	0.82717	36.425	35	0	Median	37.6	32.7	16929000000	7854700000	9074700000	8147000000	3876600000
P32319;P53751;P40890;P40438	P32319;P53751;P40890;P40438	2;1;1;1	2;1;1;1	2;1;1;1	Vacuolar protein sorting/targeting protein VPS10;Uncharacterized membrane glycoprotein YNR065C;VPS10 homolog 2;VPS10 homolog 1	PEP1;VTH2;VTH1	>sp|P32319|VPS10_YEAST Vacuolar protein sorting/targeting protein VPS10 OS=Saccharomyces cerevisiae (strain ATCC 204508 / S288c) GN=PEP1 PE=1 SV=1;>sp|P53751|YN94_YEAST Uncharacterized membrane glycoprotein YNR065C OS=Saccharomyces cerevisiae (strain ATCC	4	2	2	2	1	2	1	2	1	2	1.4	1.4	1.4	177.78	1579	1579;1116;1549;1549	0	1.2977	1.2166	25.754	4	3	Median	0.94298	0.98817	12.466	2	2	Median	1.7673	1.4913	11.855	2	1	Median	0.9	1.4	80488000	34256000	46232000	36990000	17755000
P32324	P32324	38	38	38	Elongation factor 2	EFT1	>sp|P32324|EF2_YEAST Elongation factor 2 OS=Saccharomyces cerevisiae (strain ATCC 204508 / S288c) GN=EFT1 PE=1 SV=1	1	38	38	38	34	36	34	36	34	36	48.8	48.8	48.8	93.288	842	842	0	0.94166	0.95245	34.93	87	0	Median	0.94166	1.0582	28.887	43	0	Median	0.94815	0.77685	32.818	44	0	Median	41.3	48	44881000000	20875000000	24006000000	21893000000	10686000000
P32327	P32327	100	42	42	Pyruvate carboxylase 2	PYC2	>sp|P32327|PYC2_YEAST Pyruvate carboxylase 2 OS=Saccharomyces cerevisiae (strain ATCC 204508 / S288c) GN=PYC2 PE=1 SV=2	1	100	42	42	94	97	37	40	37	40	63.1	32.9	32.9	130.17	1180	1180	0	1.0553	0.98565	51.194	112	0	Median	1.2274	1.3782	37.435	55	0	Median	0.84926	0.69828	32.708	57	0	Median	56.2	62.5	128300000000	61260000000	67044000000	59549000000	25271000000
P32332	P32332	2	2	2	Mitochondrial oxaloacetate transport protein	OAC1	>sp|P32332|OAC1_YEAST Mitochondrial oxaloacetate transport protein OS=Saccharomyces cerevisiae (strain ATCC 204508 / S288c) GN=OAC1 PE=1 SV=1	1	2	2	2	2	2	2	2	2	2	7.4	7.4	7.4	35.153	324	324	0	0.98457	0.92885	23.868	4	0	Median	0.71079	0.79856	1.8019	2	0	Median	1.4376	1.1777	14.004	2	0	Median	7.4	7.4	389100000	188770000	200330000	175120000	100290000
P32340	P32340	21	21	21	Rotenone-insensitive NADH-ubiquinone oxidoreductase, mitochondrial	NDI1	>sp|P32340|NDI1_YEAST Rotenone-insensitive NADH-ubiquinone oxidoreductase, mitochondrial OS=Saccharomyces cerevisiae (strain ATCC 204508 / S288c) GN=NDI1 PE=1 SV=1	1	21	21	21	19	18	19	18	19	18	43.1	43.1	43.1	57.249	513	513	0	1.1226	1.0388	33.573	34	0	Median	0.95955	1.1185	37.993	17	0	Median	1.2283	0.99002	26.092	17	0	Median	42.1	36.3	8284800000	4052800000	4232000000	4050200000	2137600000
P32343	P32343	1	1	1	Protein SSH4	SSH4	>sp|P32343|SSH4_YEAST Protein SSH4 OS=Saccharomyces cerevisiae (strain ATCC 204508 / S288c) GN=SSH4 PE=1 SV=2	1	1	1	1	1	1	1	1	1	1	2.1	2.1	2.1	65.06	579	579	0.0017331	0.94095	0.91467	47.263	4	0	Median	1.0185	1.1422	13.603	2	0	Median	0.69908	0.58548	45.286	2	0	Median	2.1	2.1	160550000	84311000	76239000	80724000	39590000
P32353	P32353	1	1	1	C-5 sterol desaturase	ERG3	>sp|P32353|ERG3_YEAST C-5 sterol desaturase OS=Saccharomyces cerevisiae (strain ATCC 204508 / S288c) GN=ERG3 PE=1 SV=1	1	1	1	1	1	1	1	1	1	1	4.4	4.4	4.4	42.73	365	365	0	0.95355	0.9289	21.892	2	2	Median	NaN	NaN	NaN	1	1	Median	NaN	NaN	NaN	1	1	Median	4.4	4.4	48263000	24818000	23445000	23661000	12151000
P32356	P32356	2	2	2	Neutral trehalase	NTH1	>sp|P32356|TREA_YEAST Neutral trehalase OS=Saccharomyces cerevisiae (strain ATCC 204508 / S288c) GN=NTH1 PE=1 SV=3	1	2	2	2	2	2	2	2	2	2	3.5	3.5	3.5	85.878	751	751	0	1.2152	1.2273	36.313	2	0	Median	NaN	NaN	NaN	1	0	Median	NaN	NaN	NaN	1	0	Median	3.5	3.5	43191000	19617000	23574000	19337000	10935000
P32366	P32366	2	2	2	V-type proton ATPase subunit d	VMA6	>sp|P32366|VA0D_YEAST V-type proton ATPase subunit d OS=Saccharomyces cerevisiae (strain ATCC 204508 / S288c) GN=VMA6 PE=1 SV=2	1	2	2	2	1	1	1	1	1	1	5.2	5.2	5.2	39.79	345	345	0	1.6902	1.4458	24.339	3	0	Median	NaN	NaN	NaN	1	0	Median	1.7078	1.5192	7.0016	2	0	Median	2.9	2.3	97910000	46524000	51386000	45351000	24442000
P32368	P32368	1	1	1	Phosphoinositide phosphatase SAC1	SAC1	>sp|P32368|SAC1_YEAST Phosphoinositide phosphatase SAC1 OS=Saccharomyces cerevisiae (strain ATCC 204508 / S288c) GN=SAC1 PE=1 SV=1	1	1	1	1	1	1	1	1	1	1	2.2	2.2	2.2	71.124	623	623	0	0.92728	0.88215	41.137	2	0	Median	NaN	NaN	NaN	1	0	Median	NaN	NaN	NaN	1	0	Median	2.2	2.2	15113000	7743700	7369000	7519100	4530900
P32377	P32377	10	10	10	Diphosphomevalonate decarboxylase	MVD1	>sp|P32377|MVD1_YEAST Diphosphomevalonate decarboxylase OS=Saccharomyces cerevisiae (strain ATCC 204508 / S288c) GN=MVD1 PE=1 SV=2	1	10	10	10	9	7	9	7	9	7	30.6	30.6	30.6	44.115	396	396	0	1.0598	1.0205	23.667	16	0	Median	0.83907	0.95487	23.885	9	0	Median	1.2993	1.0462	24.865	7	0	Median	29	22.2	1768300000	854510000	913810000	948210000	495420000
P32379	P32379	8	8	8	Proteasome subunit alpha type-5	PUP2	>sp|P32379|PSA5_YEAST Proteasome subunit alpha type-5 OS=Saccharomyces cerevisiae (strain ATCC 204508 / S288c) GN=PUP2 PE=1 SV=2	1	8	8	8	8	6	8	6	8	6	30	30	30	28.617	260	260	0	0.91822	0.97705	29.134	13	0	Median	0.88816	1.0178	30.338	8	0	Median	0.99875	0.84439	23.935	5	0	Median	30	23.5	964590000	465720000	498870000	526670000	252930000
P32381	P32381	7	7	7	Actin-related protein 2	ARP2	>sp|P32381|ARP2_YEAST Actin-related protein 2 OS=Saccharomyces cerevisiae (strain ATCC 204508 / S288c) GN=ARP2 PE=1 SV=1	1	7	7	7	3	7	3	7	3	7	24.3	24.3	24.3	44.073	391	391	0	1.2694	1.0397	25.527	7	0	Median	1.4235	1.6574	75.112	3	1	Median	1.2694	1.0397	16.958	5	0	Median	12.8	24.3	498910000	204220000	294690000	124060000	51125000
P32386;P38735	P32386;P38735	2;1	2;1	2;1	ATP-dependent bile acid permease;ABC transporter ATP-binding protein/permease VMR1	YBT1;VMR1	>sp|P32386|YBT1_YEAST ATP-dependent bile acid permease OS=Saccharomyces cerevisiae (strain ATCC 204508 / S288c) GN=YBT1 PE=1 SV=2;>sp|P38735|VMR1_YEAST ABC transporter ATP-binding protein/permease VMR1 OS=Saccharomyces cerevisiae (strain ATCC 204508 / S288	2	2	2	2	2	2	2	2	2	2	1.6	1.6	1.6	189.16	1661	1661;1592	0	1.1599	1.1644	32.522	5	0	Median	0.78308	0.87121	35.009	3	0	Median	1.4629	1.2658	11.807	2	0	Median	1.6	1.6	46999000	21005000	25993000	25274000	12425000
P32387	P32387	2	2	2	54S ribosomal protein L41, mitochondrial	MRP20	>sp|P32387|RM41_YEAST 54S ribosomal protein L41, mitochondrial OS=Saccharomyces cerevisiae (strain ATCC 204508 / S288c) GN=MRP20 PE=1 SV=1	1	2	2	2	2	2	2	2	2	2	12.5	12.5	12.5	30.566	263	263	0	1.3238	1.3742	27.703	6	5	Median	1.7047	1.4286	19.539	3	3	Plateau	1.1437	1.0177	19.138	3	2	Median	12.5	12.5	271210000	133600000	137610000	124810000	60057000
P32388	P32388	2	2	2	54S ribosomal protein MRP49, mitochondrial	MRP49	>sp|P32388|RM49_YEAST 54S ribosomal protein MRP49, mitochondrial OS=Saccharomyces cerevisiae (strain ATCC 204508 / S288c) GN=MRP49 PE=1 SV=1	1	2	2	2	1	1	1	1	1	1	10.9	10.9	10.9	16.021	137	137	0.0034305	1.304	1.3175	22.122	2	0	Median	NaN	NaN	NaN	1	0	Median	NaN	NaN	NaN	1	0	Median	5.1	5.8	43627000	19562000	24065000	14555000	8695100
P32419	P32419	6	6	6	Malate dehydrogenase, peroxisomal	MDH3	>sp|P32419|MDHP_YEAST Malate dehydrogenase, peroxisomal OS=Saccharomyces cerevisiae (strain ATCC 204508 / S288c) GN=MDH3 PE=1 SV=3	1	6	6	6	5	3	5	3	5	3	16	16	16	37.186	343	343	0	1.1923	1.1613	32.279	8	0	Median	1.1471	1.2637	34.474	5	0	Median	1.25	0.95063	29.931	3	0	Median	12	9.6	620470000	315300000	305170000	394810000	212760000
P32445	P32445	5	5	5	Single-stranded DNA-binding protein RIM1, mitochondrial	RIM1	>sp|P32445|RIM1_YEAST Single-stranded DNA-binding protein RIM1, mitochondrial OS=Saccharomyces cerevisiae (strain ATCC 204508 / S288c) GN=RIM1 PE=1 SV=1	1	5	5	5	5	3	5	3	5	3	30.4	30.4	30.4	15.386	135	135	0	0.91416	1.0552	44.864	7	0	Median	0.92301	1.0606	35.227	4	0	Median	0.68587	0.58182	39.03	3	0	Median	30.4	24.4	1004400000	490760000	513640000	581370000	263640000
P32449	P32449	6	6	5	Phospho-2-dehydro-3-deoxyheptonate aldolase, tyrosine-inhibited	ARO4	>sp|P32449|AROG_YEAST Phospho-2-dehydro-3-deoxyheptonate aldolase, tyrosine-inhibited OS=Saccharomyces cerevisiae (strain ATCC 204508 / S288c) GN=ARO4 PE=1 SV=2	1	6	6	5	6	4	6	4	5	3	19.2	19.2	17.3	39.749	370	370	0	1.0427	1.1947	32.387	11	0	Median	1.1779	1.325	26.224	8	0	Median	0.92447	0.80358	12.134	3	0	Median	19.2	11.6	991340000	470890000	520450000	624650000	280830000
P32453	P32453	1	1	1	Protein ATP11, mitochondrial	ATP11	>sp|P32453|ATP11_YEAST Protein ATP11, mitochondrial OS=Saccharomyces cerevisiae (strain ATCC 204508 / S288c) GN=ATP11 PE=1 SV=1	1	1	1	1	1	1	1	1	1	1	3.5	3.5	3.5	36.851	318	318	0.005848	0.46391	0.46575	29.287	2	2	Median	NaN	NaN	NaN	1	1	Median	NaN	NaN	NaN	1	1	Median	3.5	3.5	87028000	64891000	22138000	30505000	22332000
P32454	P32454	4	4	4	Aminopeptidase 2, mitochondrial	APE2	>sp|P32454|APE2_YEAST Aminopeptidase 2, mitochondrial OS=Saccharomyces cerevisiae (strain ATCC 204508 / S288c) GN=APE2 PE=1 SV=4	1	4	4	4	4	3	4	3	4	3	5.7	5.7	5.7	107.75	952	952	0	1.0704	0.93557	15.323	5	0	Median	0.8257	0.9028	33.84	4	2	Median	1.1359	0.94797	16.212	3	0	Median	5.7	4.3	373710000	196670000	177040000	205960000	113240000
P32457	P32457	3	3	3	Cell division control protein 3	CDC3	>sp|P32457|CDC3_YEAST Cell division control protein 3 OS=Saccharomyces cerevisiae (strain ATCC 204508 / S288c) GN=CDC3 PE=1 SV=3	1	3	3	3	3	1	3	1	3	1	6.9	6.9	6.9	60.054	520	520	0	1.1435	1.015	29.712	3	0	Median	0.81073	0.92227	55.438	3	1	Median	NaN	NaN	NaN	1	0	Median	6.9	2.5	98839000	50808000	48031000	63809000	33690000
P32462	P32462	1	1	1	Delta(14)-sterol reductase	ERG24	>sp|P32462|ERG24_YEAST Delta(14)-sterol reductase OS=Saccharomyces cerevisiae (strain ATCC 204508 / S288c) GN=ERG24 PE=1 SV=1	1	1	1	1	1	1	1	1	1	1	2.7	2.7	2.7	50.615	438	438	0	1.1316	1.1239	127.65	2	0	Median	NaN	NaN	NaN	1	0	Median	NaN	NaN	NaN	1	0	Median	2.7	2.7	122210000	45718000	76492000	60954000	15182000
P32468	P32468	11	11	11	Cell division control protein 12	CDC12	>sp|P32468|CDC12_YEAST Cell division control protein 12 OS=Saccharomyces cerevisiae (strain ATCC 204508 / S288c) GN=CDC12 PE=1 SV=1	1	11	11	11	11	8	11	8	11	8	31.7	31.7	31.7	46.667	407	407	0	0.96638	1.0227	46.66	15	0	Median	1.0064	1.0939	37.272	9	0	Median	0.96595	0.77814	40.094	6	0	Median	31.7	24.3	1347800000	682750000	665090000	717810000	341120000
P32469	P32469	1	1	1	Diphthine synthase	DPH5	>sp|P32469|DPH5_YEAST Diphthine synthase OS=Saccharomyces cerevisiae (strain ATCC 204508 / S288c) GN=DPH5 PE=1 SV=1	1	1	1	1	1	1	1	1	1	1	4.3	4.3	4.3	33.847	300	300	0	1.0513	1.0419	6.4217	2	0	Median	NaN	NaN	NaN	1	0	Median	NaN	NaN	NaN	1	0	Median	4.3	4.3	419790000	195150000	224650000	194510000	97430000
P32471	P32471	2	2	2	Elongation factor 1-beta	EFB1	>sp|P32471|EF1B_YEAST Elongation factor 1-beta OS=Saccharomyces cerevisiae (strain ATCC 204508 / S288c) GN=EFB1 PE=1 SV=4	1	2	2	2	2	2	2	2	2	2	17	17	17	22.627	206	206	0	1.167	1.0703	17.766	4	0	Median	0.9953	1.121	24.46	2	0	Median	1.2967	1.0691	18.059	2	0	Median	17	17	524210000	239780000	284430000	258180000	136830000
P32473	P32473	10	10	10	Pyruvate dehydrogenase E1 component subunit beta, mitochondrial	PDB1	>sp|P32473|ODPB_YEAST Pyruvate dehydrogenase E1 component subunit beta, mitochondrial OS=Saccharomyces cerevisiae (strain ATCC 204508 / S288c) GN=PDB1 PE=1 SV=2	1	10	10	10	8	10	8	10	8	10	27.3	27.3	27.3	40.053	366	366	0	1.0535	1.1075	29.966	18	0	Median	0.74655	0.87565	22.735	7	0	Median	1.3679	1.1113	34.876	11	0	Median	26.5	27.3	3498200000	1701200000	1797000000	1653100000	909800000
P32476	P32476	3	3	3	Squalene monooxygenase	ERG1	>sp|P32476|ERG1_YEAST Squalene monooxygenase OS=Saccharomyces cerevisiae (strain ATCC 204508 / S288c) GN=ERG1 PE=1 SV=2	1	3	3	3	2	3	2	3	2	3	6.7	6.7	6.7	55.125	496	496	0	0.93469	1.0742	100.89	5	3	Median	0.46627	0.52039	103	2	1	Median	1.3739	1.0742	98.609	3	2	Median	3.8	6.7	221710000	111260000	110450000	94862000	53715000
P32477	P32477	1	1	1	Glutamate--cysteine ligase	GSH1	>sp|P32477|GSH1_YEAST Glutamate--cysteine ligase OS=Saccharomyces cerevisiae (strain ATCC 204508 / S288c) GN=GSH1 PE=1 SV=1	1	1	1	1	1	1	1	1	1	1	1.6	1.6	1.6	78.253	678	678	0	1.0206	0.9965	31.049	2	0	Median	NaN	NaN	NaN	1	0	Median	NaN	NaN	NaN	1	0	Median	1.6	1.6	31063000	14411000	16652000	15649000	8438700
P32481	P32481	17	17	17	Eukaryotic translation initiation factor 2 subunit gamma	GCD11	>sp|P32481|IF2G_YEAST Eukaryotic translation initiation factor 2 subunit gamma OS=Saccharomyces cerevisiae (strain ATCC 204508 / S288c) GN=GCD11 PE=1 SV=1	1	17	17	17	12	15	12	15	12	15	32.1	32.1	32.1	57.865	527	527	0	0.80081	0.83457	72.365	23	0	Median	0.68271	0.79722	60.133	11	0	Median	1.2521	1.0605	84.355	12	0	Median	25.4	30.4	3173200000	1612400000	1560800000	1316500000	770530000
P32485	P32485	2	2	2	Mitogen-activated protein kinase HOG1	HOG1	>sp|P32485|HOG1_YEAST Mitogen-activated protein kinase HOG1 OS=Saccharomyces cerevisiae (strain ATCC 204508 / S288c) GN=HOG1 PE=1 SV=2	1	2	2	2	2	2	2	2	2	2	4.8	4.8	4.8	48.858	435	435	0	1.0448	1.1187	43.632	4	0	Median	1.0448	1.2034	26.233	2	0	Median	0.94459	0.821	59.672	2	0	Median	4.8	4.8	107780000	52663000	55118000	52073000	24399000
P32495	P32495	3	3	3	H/ACA ribonucleoprotein complex subunit 2	NHP2	>sp|P32495|NHP2_YEAST H/ACA ribonucleoprotein complex subunit 2 OS=Saccharomyces cerevisiae (strain ATCC 204508 / S288c) GN=NHP2 PE=1 SV=2	1	3	3	3	1	3	1	3	1	3	19.2	19.2	19.2	17.122	156	156	0	1.8413	1.5455	70.674	4	2	Median	NaN	NaN	NaN	1	1	Median	1.862	1.5677	25.686	3	1	Median	9	19.2	528870000	232220000	296650000	188850000	126040000
P32497	P32497	6	6	6	Eukaryotic translation initiation factor 3 subunit C	NIP1	>sp|P32497|EIF3C_YEAST Eukaryotic translation initiation factor 3 subunit C OS=Saccharomyces cerevisiae (strain ATCC 204508 / S288c) GN=NIP1 PE=1 SV=2	1	6	6	6	6	5	6	5	6	5	9.1	9.1	9.1	93.203	812	812	0	0.87513	0.89432	15.852	9	0	Median	0.73755	0.85836	15.641	5	0	Median	1.1105	0.96442	13.071	4	0	Median	9.1	7.9	655160000	306630000	348530000	355480000	171730000
P32500	P32500	1	1	1	Nucleoporin NDC1	NDC1	>sp|P32500|NDC1_YEAST Nucleoporin NDC1 OS=Saccharomyces cerevisiae (strain ATCC 204508 / S288c) GN=NDC1 PE=1 SV=1	1	1	1	1	0	1	0	1	0	1	1.8	1.8	1.8	74.133	655	655	0	NaN	NaN	NaN	1	1	Median	NaN	NaN	NaN	0	0	Median	NaN	NaN	NaN	1	1	Median	0	1.8	63052000	31537000	31515000	0	0
P32501	P32501	2	2	2	Translation initiation factor eIF-2B subunit epsilon	GCD6	>sp|P32501|EI2BE_YEAST Translation initiation factor eIF-2B subunit epsilon OS=Saccharomyces cerevisiae (strain ATCC 204508 / S288c) GN=GCD6 PE=1 SV=1	1	2	2	2	1	2	1	2	1	2	3.5	3.5	3.5	81.16	712	712	0	1.2311	1.2085	43.47	3	1	Plateau	NaN	NaN	NaN	1	0	Median	1.0075	0.85814	57.663	2	1	Median	1.4	3.5	67067000	34530000	32537000	23079000	12488000
P32505	P32505	3	3	3	Nuclear polyadenylated RNA-binding protein NAB2	NAB2	>sp|P32505|NAB2_YEAST Nuclear polyadenylated RNA-binding protein NAB2 OS=Saccharomyces cerevisiae (strain ATCC 204508 / S288c) GN=NAB2 PE=1 SV=1	1	3	3	3	2	2	2	2	2	2	8.8	8.8	8.8	58.32	525	525	0	1.0109	1.0104	62.388	4	0	Median	0.55993	0.63764	4.0376	2	0	Median	2.2723	1.8313	23.023	2	0	Median	6.1	7	209290000	90460000	118830000	85536000	58763000
P32527	P32527	10	10	10	Zuotin	ZUO1	>sp|P32527|ZUO1_YEAST Zuotin OS=Saccharomyces cerevisiae (strain ATCC 204508 / S288c) GN=ZUO1 PE=1 SV=1	1	10	10	10	6	10	6	10	6	10	22.2	22.2	22.2	49.019	433	433	0	0.93222	0.84128	49.034	19	0	Median	1.045	1.1368	25.11	7	0	Median	0.89818	0.7808	58.33	12	0	Median	13.9	22.2	1388000000	679700000	708260000	659630000	309150000
P32528	P32528	88	88	88	Urea amidolyase;Urea carboxylase;Allophanate hydrolase	DUR1,2	>sp|P32528|DUR1_YEAST Urea amidolyase OS=Saccharomyces cerevisiae (strain ATCC 204508 / S288c) GN=DUR1,2 PE=1 SV=2	1	88	88	88	79	82	79	82	79	82	47.6	47.6	47.6	201.83	1835	1835	0	0.98861	0.94976	44.903	178	0	Median	1.1442	1.2958	32.258	88	0	Median	0.83868	0.71199	36.801	90	0	Median	45.4	43.1	52891000000	26763000000	26127000000	25341000000	12363000000
P32529	P32529	10	10	10	DNA-directed RNA polymerase I subunit RPA12	RPA12	>sp|P32529|RPA12_YEAST DNA-directed RNA polymerase I subunit RPA12 OS=Saccharomyces cerevisiae (strain ATCC 204508 / S288c) GN=RPA12 PE=1 SV=1	1	10	10	10	10	8	10	8	10	8	64	64	64	13.66	125	125	0	1.0256	0.94302	64.066	17	0	Median	1.2747	1.4433	44.586	8	0	Median	0.59076	0.48379	35.918	9	0	Median	64	64	6619000000	3121500000	3497500000	3322500000	1424800000
P32563	P32563	7	7	7	V-type proton ATPase subunit a, vacuolar isoform	VPH1	>sp|P32563|VPH1_YEAST V-type proton ATPase subunit a, vacuolar isoform OS=Saccharomyces cerevisiae (strain ATCC 204508 / S288c) GN=VPH1 PE=1 SV=3	1	7	7	7	6	7	6	7	6	7	8.8	8.8	8.8	95.528	840	840	0	1.0078	0.93569	9.6453	10	0	Median	0.83966	0.93546	8.3261	5	0	Median	1.1138	0.93592	11.732	5	0	Median	6.2	8.8	1022000000	547800000	474250000	519870000	306580000
P32564	P32564	3	3	3	Protein SCM4	SCM4	>sp|P32564|SCM4_YEAST Protein SCM4 OS=Saccharomyces cerevisiae (strain ATCC 204508 / S288c) GN=SCM4 PE=1 SV=1	1	3	3	3	2	3	2	3	2	3	14.4	14.4	14.4	20.118	187	187	0	0.95725	0.94431	30.243	4	0	Median	0.6441	0.74687	13.162	2	0	Median	1.2898	1.0878	28.53	3	1	Median	9.6	14.4	486530000	249330000	237200000	209740000	127730000
P32565	P32565	3	3	3	26S proteasome regulatory subunit RPN2	RPN2	>sp|P32565|RPN2_YEAST 26S proteasome regulatory subunit RPN2 OS=Saccharomyces cerevisiae (strain ATCC 204508 / S288c) GN=RPN2 PE=1 SV=4	1	3	3	3	2	3	2	3	2	3	3.6	3.6	3.6	104.23	945	945	0	0.70418	0.81371	50.342	5	0	Median	1.1271	1.2626	62.129	2	0	Median	0.68557	0.61178	35.803	3	0	Median	2.3	3.6	586440000	282130000	304320000	276360000	132920000
P32582	P32582	22	22	22	Cystathionine beta-synthase	CYS4	>sp|P32582|CBS_YEAST Cystathionine beta-synthase OS=Saccharomyces cerevisiae (strain ATCC 204508 / S288c) GN=CYS4 PE=1 SV=1	1	22	22	22	20	20	20	20	20	20	44.4	44.4	44.4	56.021	507	507	0	0.90054	0.94527	34.903	33	0	Median	0.82374	0.93678	37.079	16	0	Median	1.1368	0.94527	32.021	17	0	Median	37.9	41.4	6117100000	3151300000	2965800000	3047800000	1601900000
P32589	P32589	17	17	12	Heat shock protein homolog SSE1	SSE1	>sp|P32589|HSP7F_YEAST Heat shock protein homolog SSE1 OS=Saccharomyces cerevisiae (strain ATCC 204508 / S288c) GN=SSE1 PE=1 SV=4	1	17	17	12	16	14	16	14	11	11	26.4	26.4	18.8	77.365	693	693	0	0.97367	0.97749	56.521	30	0	Median	1.204	1.4057	44.889	17	0	Median	0.72174	0.57604	34.439	13	0	Median	23.1	23.5	3400600000	1712700000	1687900000	1773300000	850780000
P32590	P32590	7	2	2	Heat shock protein homolog SSE2	SSE2	>sp|P32590|HSP79_YEAST Heat shock protein homolog SSE2 OS=Saccharomyces cerevisiae (strain ATCC 204508 / S288c) GN=SSE2 PE=1 SV=3	1	7	2	2	7	5	2	2	2	2	12.1	3.3	3.3	77.62	693	693	0	1.426	1.2058	25.667	3	0	Median	1.1849	1.3564	45.291	2	1	Median	1.3713	1.198	0.91218	2	0	Median	12.1	9.2	136080000	58144000	77935000	66476000	29597000
P32597	P32597	2	2	2	Nuclear protein STH1/NPS1	STH1	>sp|P32597|STH1_YEAST Nuclear protein STH1/NPS1 OS=Saccharomyces cerevisiae (strain ATCC 204508 / S288c) GN=STH1 PE=1 SV=1	1	2	2	2	1	1	1	1	1	1	1.6	1.6	1.6	156.74	1359	1359	0	0.92514	0.95659	39.374	2	1	Median	NaN	NaN	NaN	1	1	Median	NaN	NaN	NaN	1	0	Median	0.8	0.8	55740000	29533000	26207000	20045000	12951000
P32598	P32598	1	1	1	Serine/threonine-protein phosphatase PP1-2	GLC7	>sp|P32598|PP12_YEAST Serine/threonine-protein phosphatase PP1-2 OS=Saccharomyces cerevisiae (strain ATCC 204508 / S288c) GN=GLC7 PE=1 SV=1	1	1	1	1	1	1	1	1	1	1	5.1	5.1	5.1	35.907	312	312	0	1.2382	1.3894	50.001	3	2	Median	1.2663	1.423	3.3837	2	2	Median	NaN	NaN	NaN	1	0	Median	5.1	5.1	402890000	194810000	208080000	260740000	112230000
P32599	P32599	6	6	6	Fimbrin	SAC6	>sp|P32599|FIMB_YEAST Fimbrin OS=Saccharomyces cerevisiae (strain ATCC 204508 / S288c) GN=SAC6 PE=1 SV=1	1	6	6	6	6	3	6	3	6	3	13.1	13.1	13.1	71.772	642	642	0	1.14	1.1994	17.537	6	0	Median	1.1237	1.3009	17.463	4	0	Median	1.3942	1.1346	18.427	3	1	Plateau	13.1	5.5	879320000	414460000	464860000	539320000	267550000
P32602	P32602	5	5	5	Alpha-soluble NSF attachment protein	SEC17	>sp|P32602|SEC17_YEAST Alpha-soluble NSF attachment protein OS=Saccharomyces cerevisiae (strain ATCC 204508 / S288c) GN=SEC17 PE=1 SV=4	1	5	5	5	4	4	4	4	4	4	24	24	24	32.802	292	292	0	1.1743	1.0687	25.984	8	0	Median	0.89892	1.0243	18.021	4	0	Median	1.3145	1.0687	32.15	4	0	Median	18.5	19.5	280700000	126880000	153820000	141770000	74072000
P32610	P32610	5	5	5	V-type proton ATPase subunit D	VMA8	>sp|P32610|VATD_YEAST V-type proton ATPase subunit D OS=Saccharomyces cerevisiae (strain ATCC 204508 / S288c) GN=VMA8 PE=1 SV=1	1	5	5	5	4	5	4	5	4	5	14.8	14.8	14.8	29.194	256	256	0	1.221	1.2396	46.398	7	0	Median	1.2571	1.3515	27.432	4	0	Median	0.7177	0.64795	53.546	3	0	Median	10.5	14.8	882250000	437000000	445250000	452790000	230810000
P32611	P32611	4	4	4	54S ribosomal protein RML2, mitochondrial	RML2	>sp|P32611|RML2_YEAST 54S ribosomal protein RML2, mitochondrial OS=Saccharomyces cerevisiae (strain ATCC 204508 / S288c) GN=RML2 PE=1 SV=1	1	4	4	4	3	3	3	3	3	3	14.2	14.2	14.2	43.785	393	393	0	0.92642	0.90152	24.342	4	0	Median	0.79324	0.90119	25.046	3	1	Median	1.1784	0.93834	6.0354	3	1	Median	10.2	12	562960000	292790000	270170000	275200000	157670000
P32614	P32614	3	3	3	Fumarate reductase		>sp|P32614|FRDS_YEAST Fumarate reductase 1 OS=Saccharomyces cerevisiae (strain ATCC 204508 / S288c) GN=FRD1 PE=1 SV=1	1	3	3	3	2	2	2	2	2	2	7	7	7	50.843	470	470	0	0.90992	0.83182	21.802	5	0	Median	0.80107	0.96393	23.909	3	0	Median	0.91638	0.83182	15.501	3	1	Median	4	5.3	327020000	173740000	153290000	164300000	92231000
P32623	P32623	1	1	1	Probable glycosidase CRH2	UTR2	>sp|P32623|CRH2_YEAST Probable glycosidase CRH2 OS=Saccharomyces cerevisiae (strain ATCC 204508 / S288c) GN=UTR2 PE=1 SV=3	1	1	1	1	1	0	1	0	1	0	2.4	2.4	2.4	49.906	467	467	0.0098119	NaN	NaN	NaN	1	0	Median	NaN	NaN	NaN	1	0	Median	NaN	NaN	NaN	0	0	Median	2.4	0	80291000	46788000	33503000	80291000	46788000
P32628	P32628	1	1	1	UV excision repair protein RAD23	RAD23	>sp|P32628|RAD23_YEAST UV excision repair protein RAD23 OS=Saccharomyces cerevisiae (strain ATCC 204508 / S288c) GN=RAD23 PE=1 SV=1	1	1	1	1	1	1	1	1	1	1	4.3	4.3	4.3	42.366	398	398	0.00089445	0.85575	0.8296	45.12	2	0	Median	NaN	NaN	NaN	1	0	Median	NaN	NaN	NaN	1	0	Median	4.3	4.3	32244000	17062000	15183000	13466000	5370100
P32770	P32770	5	5	5	Asparagine-rich protein	NRP1	>sp|P32770|NRP1_YEAST Asparagine-rich protein OS=Saccharomyces cerevisiae (strain ATCC 204508 / S288c) GN=NRP1 PE=1 SV=2	1	5	5	5	3	5	3	5	3	5	9.7	9.7	9.7	79.298	719	719	0	0.54779	0.47685	82.631	7	0	Median	2.6726	3.0472	41.818	4	2	Linear	0.5447	0.45567	18.515	5	0	Median	5	9.7	431680000	221690000	209980000	198490000	61515000
P32771	P32771	1	1	1	S-(hydroxymethyl)glutathione dehydrogenase	SFA1	>sp|P32771|FADH_YEAST S-(hydroxymethyl)glutathione dehydrogenase OS=Saccharomyces cerevisiae (strain ATCC 204508 / S288c) GN=SFA1 PE=1 SV=1	1	1	1	1	1	1	1	1	1	1	2.3	2.3	2.3	41.042	386	386	0	0.99917	1.0092	32.937	3	0	Median	1.0846	1.175	21.501	2	0	Median	NaN	NaN	NaN	1	0	Median	2.3	2.3	191660000	100440000	91219000	145060000	75422000
P32784	P32784	1	1	1	Glycerol-3-phosphate O-acyltransferase 1	SCT1	>sp|P32784|GPT1_YEAST Glycerol-3-phosphate O-acyltransferase 1 OS=Saccharomyces cerevisiae (strain ATCC 204508 / S288c) GN=SCT1 PE=1 SV=3	1	1	1	1	0	1	0	1	0	1	0.9	0.9	0.9	85.693	759	759	0.00089847	NaN	NaN	NaN	1	0	Median	NaN	NaN	NaN	0	0	Median	NaN	NaN	NaN	1	0	Median	0	0.9	19381000	8621600	10760000	0	0
P32787	P32787	4	4	4	Mitochondrial genome maintenance protein MGM101	MGM101	>sp|P32787|MG101_YEAST Mitochondrial genome maintenance protein MGM101 OS=Saccharomyces cerevisiae (strain ATCC 204508 / S288c) GN=MGM101 PE=1 SV=1	1	4	4	4	3	2	3	2	3	2	20.4	20.4	20.4	30.09	269	269	0	1.0667	1.0094	25.722	4	0	Median	1.1557	1.317	10.419	3	1	Median	1.0052	0.81387	15.977	2	0	Median	13.4	12.6	357990000	180620000	177370000	247230000	120000000
P32795	P32795	6	6	6	Mitochondrial inner membrane i-AAA protease supercomplex subunit YME1	YME1	>sp|P32795|YME1_YEAST Mitochondrial inner membrane i-AAA protease supercomplex subunit YME1 OS=Saccharomyces cerevisiae (strain ATCC 204508 / S288c) GN=YME1 PE=1 SV=1	1	6	6	6	5	3	5	3	5	3	8	8	8	81.771	747	747	0	0.7205	0.79974	32.436	5	0	Median	0.7205	0.79974	27.463	3	0	Median	1.1798	0.93386	44.042	3	1	Median	7.4	3.6	423970000	282240000	141730000	301720000	219090000
P32796-2;P32796	P32796-2;P32796	1;1	1;1	1;1	Carnitine O-acetyltransferase, mitochondrial	CAT2	>sp|P32796-2|CACP_YEAST Isoform Peroxisomal of Carnitine O-acetyltransferase, mitochondrial OS=Saccharomyces cerevisiae (strain ATCC 204508 / S288c) GN=CAT2;>sp|P32796|CACP_YEAST Carnitine O-acetyltransferase, mitochondrial OS=Saccharomyces cerevisiae (str	2	1	1	1	1	1	1	1	1	1	2	2	2	74.69	648	648;670	0	1.0177	1.0178	32.988	2	1	Median	NaN	NaN	NaN	1	0	Median	NaN	NaN	NaN	1	1	Median	2	2	104030000	52428000	51605000	49658000	29609000
P32799	P32799	5	5	5	Cytochrome c oxidase subunit 6A, mitochondrial	COX13	>sp|P32799|COX13_YEAST Cytochrome c oxidase subunit 6A, mitochondrial OS=Saccharomyces cerevisiae (strain ATCC 204508 / S288c) GN=COX13 PE=1 SV=1	1	5	5	5	3	5	3	5	3	5	36.4	36.4	36.4	15.021	129	129	0	0.87833	0.89992	70.929	6	0	Median	0.87038	1.0126	52.478	3	0	Median	0.88635	0.76349	76.644	3	0	Median	20.2	36.4	350320000	182360000	167970000	169440000	81814000
P32835;P32836	P32835;P32836	5;5	5;5	5;5	GTP-binding nuclear protein GSP1/CNR1;GTP-binding nuclear protein GSP2/CNR2	GSP1;GSP2	>sp|P32835|GSP1_YEAST GTP-binding nuclear protein GSP1/CNR1 OS=Saccharomyces cerevisiae (strain ATCC 204508 / S288c) GN=GSP1 PE=1 SV=1;>sp|P32836|GSP2_YEAST GTP-binding nuclear protein GSP2/CNR2 OS=Saccharomyces cerevisiae (strain ATCC 204508 / S288c) GN=G	2	5	5	5	5	3	5	3	5	3	24.7	24.7	24.7	24.81	219	219;220	0	1.3305	1.3692	84.949	4	0	Median	2.1676	2.587	84.591	3	0	Median	1.9901	1.6772	77.896	3	2	Plateau	24.7	18.7	1999700000	915020000	1084600000	1105400000	564930000
P32843	P32843	3	3	3	Mitochondrial escape protein 2	YME2	>sp|P32843|YME2_YEAST Mitochondrial escape protein 2 OS=Saccharomyces cerevisiae (strain ATCC 204508 / S288c) GN=YME2 PE=1 SV=1	1	3	3	3	3	3	3	3	3	3	5.1	5.1	5.1	96.687	850	850	0	0.75449	0.84273	21.363	5	0	Median	0.67932	0.77283	9.0536	3	0	Median	1.3108	1.1023	2.3768	3	1	Median	5.1	5.1	235340000	126850000	108490000	116600000	72868000
P32855	P32855	1	1	1	Exocyst complex component SEC8	SEC8	>sp|P32855|SEC8_YEAST Exocyst complex component SEC8 OS=Saccharomyces cerevisiae (strain ATCC 204508 / S288c) GN=SEC8 PE=1 SV=1	1	1	1	1	0	1	0	1	0	1	1.1	1.1	1.1	122.22	1065	1065	0.0017559	NaN	NaN	NaN	1	0	Median	NaN	NaN	NaN	0	0	Median	NaN	NaN	NaN	1	0	Median	0	1.1	9581400	5409000	4172400	0	0
P32861	P32861	15	15	15	UTP--glucose-1-phosphate uridylyltransferase	UGP1	>sp|P32861|UGPA1_YEAST UTP--glucose-1-phosphate uridylyltransferase OS=Saccharomyces cerevisiae (strain ATCC 204508 / S288c) GN=UGP1 PE=1 SV=1	1	15	15	15	11	14	11	14	11	14	32.3	32.3	32.3	55.987	499	499	0	1.0323	0.98043	31.981	23	0	Median	0.85968	0.9865	28.411	10	0	Median	1.1481	0.95482	33.691	13	0	Median	21	31.3	2520200000	1274100000	1246100000	1072500000	555930000
P32874	P32874	16	12	12	Acetyl-CoA carboxylase, mitochondrial;Biotin carboxylase	HFA1	>sp|P32874|HFA1_YEAST Acetyl-CoA carboxylase, mitochondrial OS=Saccharomyces cerevisiae (strain ATCC 204508 / S288c) GN=HFA1 PE=1 SV=2	1	16	12	12	15	11	11	7	11	7	8.2	7.1	7.1	259.16	2273	2273	0	1.0621	1.0526	30.353	16	0	Median	1.002	1.1398	31.502	10	0	Median	1.1786	0.95648	23.207	6	0	Median	7.3	5.9	1033900000	495010000	538870000	637180000	306610000
P32891	P32891	10	10	10	D-lactate dehydrogenase [cytochrome] 1, mitochondrial	DLD1	>sp|P32891|DLD1_YEAST D-lactate dehydrogenase [cytochrome] 1, mitochondrial OS=Saccharomyces cerevisiae (strain ATCC 204508 / S288c) GN=DLD1 PE=1 SV=2	1	10	10	10	6	10	6	10	6	10	21.5	21.5	21.5	65.292	587	587	0	0.94241	0.91139	35.374	16	0	Median	0.91695	0.9951	39.532	6	0	Median	0.97473	0.81793	26.551	10	0	Median	13.6	21.5	957280000	509320000	447960000	444110000	235870000
P32895	P32895	2	2	2	Ribose-phosphate pyrophosphokinase 1	PRS1	>sp|P32895|KPR1_YEAST Ribose-phosphate pyrophosphokinase 1 OS=Saccharomyces cerevisiae (strain ATCC 204508 / S288c) GN=PRS1 PE=1 SV=1	1	2	2	2	1	2	1	2	1	2	7.5	7.5	7.5	47.047	427	427	0	1.031	1.0181	37.199	3	0	Median	NaN	NaN	NaN	1	0	Median	0.89384	0.76782	39.897	2	0	Median	2.6	7.5	190670000	100840000	89834000	64347000	30764000
P32897	P32897	1	1	1	Mitochondrial import inner membrane translocase subunit TIM23	TIM23	>sp|P32897|TIM23_YEAST Mitochondrial import inner membrane translocase subunit TIM23 OS=Saccharomyces cerevisiae (strain ATCC 204508 / S288c) GN=TIM23 PE=1 SV=1	1	1	1	1	0	1	0	1	0	1	11.7	11.7	11.7	23.243	222	222	0	NaN	NaN	NaN	1	1	Median	NaN	NaN	NaN	0	0	Median	NaN	NaN	NaN	1	1	Median	0	11.7	35190000	19321000	15869000	0	0
P32898	P32898	2	2	2	Mitochondrial presequence protease	CYM1	>sp|P32898|CYM1_YEAST Mitochondrial presequence protease OS=Saccharomyces cerevisiae (strain ATCC 204508 / S288c) GN=CYM1 PE=1 SV=2	1	2	2	2	1	2	1	2	1	2	2	2	2	112.18	989	989	0.00089928	1.5169	1.2143	55.364	3	1	Median	NaN	NaN	NaN	1	0	Median	1.9934	1.6708	45.135	2	1	Median	1.3	2	367530000	187590000	179930000	175650000	111580000
P32902	P32902	3	3	3	37S ribosomal protein MRP4, mitochondrial	MRP4	>sp|P32902|RT04_YEAST 37S ribosomal protein MRP4, mitochondrial OS=Saccharomyces cerevisiae (strain ATCC 204508 / S288c) GN=MRP4 PE=1 SV=1	1	3	3	3	2	2	2	2	2	2	10.2	10.2	10.2	44.151	394	394	0	0.8925	0.85555	43.542	3	0	Median	0.86941	1.0118	23.73	2	1	Median	1.3362	1.1793	55.724	2	0	Median	8.1	6.1	118130000	56483000	61648000	58632000	29760000
P32905;P46654	P32905;P46654	10;9	10;9	10;9	40S ribosomal protein S0-A;40S ribosomal protein S0-B	RPS0A;RPS0B	>sp|P32905|RSSA1_YEAST 40S ribosomal protein S0-A OS=Saccharomyces cerevisiae (strain ATCC 204508 / S288c) GN=RPS0A PE=1 SV=3;>sp|P46654|RSSA2_YEAST 40S ribosomal protein S0-B OS=Saccharomyces cerevisiae (strain ATCC 204508 / S288c) GN=RPS0B PE=1 SV=2	2	10	10	10	9	10	9	10	9	10	51.6	51.6	51.6	28.024	252	252;252	0	0.93506	0.9469	57.222	19	0	Median	1.0719	1.2637	51.075	11	0	Median	0.87255	0.72682	38.368	8	0	Median	48.8	51.6	20117000000	10307000000	9810100000	11236000000	6021100000
P32911	P32911	1	1	1	Eukaryotic translation initiation factor eIF-1	SUI1	>sp|P32911|SUI1_YEAST Eukaryotic translation initiation factor eIF-1 OS=Saccharomyces cerevisiae (strain ATCC 204508 / S288c) GN=SUI1 PE=1 SV=1	1	1	1	1	1	1	1	1	1	1	14.8	14.8	14.8	12.312	108	108	0	1.0022	0.93183	51.911	2	0	Median	NaN	NaN	NaN	1	0	Median	NaN	NaN	NaN	1	0	Median	14.8	14.8	148780000	77619000	71160000	75026000	36807000
P32939	P32939	3	3	3	GTP-binding protein YPT7	YPT7	>sp|P32939|YPT7_YEAST GTP-binding protein YPT7 OS=Saccharomyces cerevisiae (strain ATCC 204508 / S288c) GN=YPT7 PE=1 SV=1	1	3	3	3	1	3	1	3	1	3	17.8	17.8	17.8	23.042	208	208	0	1.1698	1.0008	24.027	3	0	Median	NaN	NaN	NaN	1	0	Median	0.89104	0.76635	50.775	4	2	Median	6.2	17.8	271120000	138950000	132160000	97512000	59352000
P33201	P33201	1	1	1	mRNA turnover protein 4	MRT4	>sp|P33201|MRT4_YEAST mRNA turnover protein 4 OS=Saccharomyces cerevisiae (strain ATCC 204508 / S288c) GN=MRT4 PE=1 SV=1	1	1	1	1	1	1	1	1	1	1	4.2	4.2	4.2	27.058	236	236	0.00091491	0.91249	0.87045	32.214	2	0	Median	NaN	NaN	NaN	1	0	Median	NaN	NaN	NaN	1	0	Median	4.2	4.2	91194000	47632000	43562000	46328000	29469000
P33204	P33204	1	1	1	Actin-related protein 2/3 complex subunit 4	ARC19	>sp|P33204|ARPC4_YEAST Actin-related protein 2/3 complex subunit 4 OS=Saccharomyces cerevisiae (strain ATCC 204508 / S288c) GN=ARC19 PE=1 SV=2	1	1	1	1	1	1	1	1	1	1	7	7	7	19.916	171	171	0	NaN	NaN	NaN	0	0	Median	NaN	NaN	NaN	0	0	Median	NaN	NaN	NaN	0	0	Median	7	7	0	0	0	0	0
P33297	P33297	13	13	13	26S protease regulatory subunit 6A	RPT5	>sp|P33297|PRS6A_YEAST 26S protease regulatory subunit 6A OS=Saccharomyces cerevisiae (strain ATCC 204508 / S288c) GN=RPT5 PE=1 SV=3	1	13	13	13	7	11	7	11	7	11	30.9	30.9	30.9	48.255	434	434	0	1.0796	1.0311	37.113	12	0	Median	1.2828	1.4008	35.841	4	0	Median	1.0796	0.95539	29.269	8	0	Median	18.4	27.9	1451200000	701030000	750160000	525270000	238280000
P33298	P33298	3	2	2	26S protease regulatory subunit 6B homolog	RPT3	>sp|P33298|PRS6B_YEAST 26S protease regulatory subunit 6B homolog OS=Saccharomyces cerevisiae (strain ATCC 204508 / S288c) GN=RPT3 PE=1 SV=2	1	3	2	2	2	3	1	2	1	2	7.7	4.9	4.9	47.893	428	428	0	0.88911	0.94773	10.194	5	0	Median	0.84191	0.95914	1.6926	2	0	Median	0.9677	0.86376	12.867	3	0	Median	4.9	7.7	176130000	85753000	90380000	78240000	43631000
P33299	P33299	10	10	10	26S protease regulatory subunit 7 homolog	RPT1	>sp|P33299|PRS7_YEAST 26S protease regulatory subunit 7 homolog OS=Saccharomyces cerevisiae (strain ATCC 204508 / S288c) GN=RPT1 PE=1 SV=1	1	10	10	10	8	8	8	8	8	8	26.6	26.6	26.6	51.982	467	467	0	1.2277	1.0462	32.625	12	0	Median	0.79976	0.91892	47.264	6	0	Median	1.3116	1.0897	9.124	6	0	Median	19.1	21.2	2126000000	1059500000	1066500000	1114200000	586980000
P33303	P33303	8	8	8	Succinate/fumarate mitochondrial transporter	SFC1	>sp|P33303|SFC1_YEAST Succinate/fumarate mitochondrial transporter OS=Saccharomyces cerevisiae (strain ATCC 204508 / S288c) GN=SFC1 PE=1 SV=2	1	8	8	8	6	7	6	7	6	7	27.6	27.6	27.6	35.34	322	322	0	0.84881	0.76563	27.054	9	0	Median	0.71121	0.80994	28.176	5	0	Median	0.87428	0.7441	28.731	4	0	Median	19.9	22.7	782090000	405170000	376930000	377140000	198940000
P33311	P33311	1	1	1	ATP-dependent permease MDL2, mitochondrial	MDL2	>sp|P33311|MDL2_YEAST ATP-dependent permease MDL2, mitochondrial OS=Saccharomyces cerevisiae (strain ATCC 204508 / S288c) GN=MDL2 PE=1 SV=3	1	1	1	1	0	1	0	1	0	1	1.4	1.4	1.4	85.136	773	773	0	NaN	NaN	NaN	1	0	Median	NaN	NaN	NaN	0	0	Median	NaN	NaN	NaN	1	0	Median	0	1.4	23102000	10004000	13097000	0	0
P33322	P33322	8	8	8	H/ACA ribonucleoprotein complex subunit 4	CBF5	>sp|P33322|CBF5_YEAST H/ACA ribonucleoprotein complex subunit 4 OS=Saccharomyces cerevisiae (strain ATCC 204508 / S288c) GN=CBF5 PE=1 SV=1	1	8	8	8	7	4	7	4	7	4	22.8	22.8	22.8	54.704	483	483	0	1.0847	1.0914	64.408	8	0	Median	0.45551	0.53201	48.028	4	0	Median	2.129	1.7486	31.018	4	0	Median	17.4	14.9	859540000	410580000	448960000	504110000	293150000
P33327	P33327	2	2	2	NAD-specific glutamate dehydrogenase	GDH2	>sp|P33327|DHE2_YEAST NAD-specific glutamate dehydrogenase OS=Saccharomyces cerevisiae (strain ATCC 204508 / S288c) GN=GDH2 PE=1 SV=1	1	2	2	2	1	2	1	2	1	2	2	2	2	124.33	1092	1092	0	1.4048	1.2077	48.624	3	0	Median	NaN	NaN	NaN	1	0	Median	1.4749	1.2388	3.5955	2	0	Median	1.1	2	39598000	20256000	19342000	14644000	10171000
P33330	P33330	6	6	6	Phosphoserine aminotransferase	SER1	>sp|P33330|SERC_YEAST Phosphoserine aminotransferase OS=Saccharomyces cerevisiae (strain ATCC 204508 / S288c) GN=SER1 PE=1 SV=1	1	6	6	6	6	3	6	3	6	3	24.1	24.1	24.1	43.415	395	395	0	0.87365	0.98264	30.275	8	0	Median	0.8953	0.99267	25.872	6	0	Median	0.81837	0.67541	24.64	3	1	Median	24.1	14.4	526810000	263940000	262870000	399620000	198070000
P33333	P33333	3	3	3	Probable 1-acyl-sn-glycerol-3-phosphate acyltransferase	SLC1	>sp|P33333|PLSC_YEAST Probable 1-acyl-sn-glycerol-3-phosphate acyltransferase OS=Saccharomyces cerevisiae (strain ATCC 204508 / S288c) GN=SLC1 PE=1 SV=1	1	3	3	3	2	2	2	2	2	2	11.6	11.6	11.6	33.887	303	303	0	0.73032	0.71614	28.075	2	0	Median	NaN	NaN	NaN	1	0	Median	NaN	NaN	NaN	1	0	Median	7.3	8.3	105620000	58855000	46766000	92025000	51854000
P33399	P33399	7	7	7	La protein homolog	LHP1	>sp|P33399|LHP1_YEAST La protein homolog OS=Saccharomyces cerevisiae (strain ATCC 204508 / S288c) GN=LHP1 PE=1 SV=2	1	7	7	7	4	5	4	5	4	5	34.2	34.2	34.2	32.104	275	275	0	0.83075	0.71347	70.034	6	0	Median	1.3281	1.5132	57.101	3	1	Median	0.66584	0.56595	39.402	4	0	Median	17.5	26.2	613760000	336650000	277110000	192350000	93506000
P33401	P33401	2	1	1	Phosphoglucomutase-1	PGM1	>sp|P33401|PGM1_YEAST Phosphoglucomutase-1 OS=Saccharomyces cerevisiae (strain ATCC 204508 / S288c) GN=PGM1 PE=1 SV=1	1	2	1	1	2	1	1	0	1	0	5.4	4	4	63.111	570	570	0	NaN	NaN	NaN	1	1	Median	NaN	NaN	NaN	1	1	Median	NaN	NaN	NaN	0	0	Median	5.4	1.4	27410000	8480600	18929000	27410000	8480600
P33416	P33416	8	8	8	Heat shock protein 78, mitochondrial	HSP78	>sp|P33416|HSP78_YEAST Heat shock protein 78, mitochondrial OS=Saccharomyces cerevisiae (strain ATCC 204508 / S288c) GN=HSP78 PE=1 SV=2	1	8	8	8	6	7	6	7	6	7	14.2	14.2	14.2	91.335	811	811	0	0.93686	1.0097	41.155	13	0	Median	1.0154	1.1282	38.573	6	0	Median	0.93686	0.781	34.099	7	0	Median	11	13.3	1553100000	765710000	787440000	873460000	406720000
P33421	P33421	3	3	3	Succinate dehydrogenase [ubiquinone] cytochrome b subunit, mitochondrial	SDH3	>sp|P33421|SDH3_YEAST Succinate dehydrogenase [ubiquinone] cytochrome b subunit, mitochondrial OS=Saccharomyces cerevisiae (strain ATCC 204508 / S288c) GN=SDH3 PE=1 SV=1	1	3	3	3	3	2	3	2	3	2	11.1	11.1	11.1	22.068	198	198	0	1.0473	1.0685	24.769	6	0	Median	1.0593	1.261	7.677	3	0	Median	0.97484	0.83677	7.6231	3	0	Median	11.1	6.6	3154700000	1462800000	1691900000	1555800000	704700000
P33442	P33442	26	8	8	40S ribosomal protein S1-A	RPS1A	>sp|P33442|RS3A1_YEAST 40S ribosomal protein S1-A OS=Saccharomyces cerevisiae (strain ATCC 204508 / S288c) GN=RPS1A PE=1 SV=2	1	26	8	8	24	23	7	7	7	7	74.5	23.1	23.1	28.743	255	255	0	0.94151	0.8761	56.984	17	0	Median	1.1062	1.2731	58.384	8	0	Median	0.94151	0.81969	49.003	9	0	Median	74.5	66.3	4018400000	1973800000	2044600000	1906600000	1083900000
P33734	P33734	1	1	1	Imidazole glycerol phosphate synthase hisHF;Glutamine amidotransferase;Cyclase	HIS7	>sp|P33734|HIS5_YEAST Imidazole glycerol phosphate synthase hisHF OS=Saccharomyces cerevisiae (strain ATCC 204508 / S288c) GN=HIS7 PE=1 SV=2	1	1	1	1	0	1	0	1	0	1	1.6	1.6	1.6	61.067	552	552	0.00090992	NaN	NaN	NaN	1	0	Median	NaN	NaN	NaN	0	0	Median	NaN	NaN	NaN	1	0	Median	0	1.6	33962000	14485000	19477000	0	0
P33759	P33759	3	3	3	37S ribosomal protein S5, mitochondrial	MRPS5	>sp|P33759|RT05_YEAST 37S ribosomal protein S5, mitochondrial OS=Saccharomyces cerevisiae (strain ATCC 204508 / S288c) GN=MRPS5 PE=1 SV=1	1	3	3	3	3	3	3	3	3	3	9.8	9.8	9.8	34.883	307	307	0	0.98333	0.97449	28.365	6	0	Median	0.68864	0.78199	9.3168	3	0	Median	1.5308	1.2817	14.237	3	0	Median	9.8	9.8	259790000	125130000	134650000	119320000	66990000
P33767	P33767	3	3	3	Dolichyl-diphosphooligosaccharide--protein glycosyltransferase subunit WBP1	WBP1	>sp|P33767|OSTB_YEAST Dolichyl-diphosphooligosaccharide--protein glycosyltransferase subunit WBP1 OS=Saccharomyces cerevisiae (strain ATCC 204508 / S288c) GN=WBP1 PE=1 SV=1	1	3	3	3	2	2	2	2	2	2	8.4	8.4	8.4	49.391	430	430	0	1.4581	1.2548	25.627	4	0	Median	1.1288	1.2807	44.286	2	0	Median	1.4581	1.2548	2.2066	2	0	Median	5.8	5.1	170860000	79123000	91734000	92512000	48405000
P33892	P33892	2	2	2	Translational activator GCN1	GCN1	>sp|P33892|GCN1_YEAST Translational activator GCN1 OS=Saccharomyces cerevisiae (strain ATCC 204508 / S288c) GN=GCN1 PE=1 SV=1	1	2	2	2	2	1	2	1	2	1	0.9	0.9	0.9	296.69	2672	2672	0	0.6077	0.67702	43.585	3	0	Median	0.55999	0.62342	11.664	2	0	Median	NaN	NaN	NaN	1	0	Median	0.9	0.4	31533000	17568000	13965000	20220000	13020000
P34160	P34160	1	1	1	Nuclear cap-binding protein complex subunit 1	STO1	>sp|P34160|NCBP1_YEAST Nuclear cap-binding protein complex subunit 1 OS=Saccharomyces cerevisiae (strain ATCC 204508 / S288c) GN=STO1 PE=1 SV=2	1	1	1	1	1	1	1	1	1	1	1.2	1.2	1.2	100.02	861	861	0	0.97183	0.98704	21.068	2	0	Median	NaN	NaN	NaN	1	0	Median	NaN	NaN	NaN	1	0	Median	1.2	1.2	105990000	48016000	57970000	58048000	32982000
P34167	P34167	2	2	2	Eukaryotic translation initiation factor 4B	TIF3	>sp|P34167|IF4B_YEAST Eukaryotic translation initiation factor 4B OS=Saccharomyces cerevisiae (strain ATCC 204508 / S288c) GN=TIF3 PE=1 SV=1	1	2	2	2	2	2	2	2	2	2	10.8	10.8	10.8	48.521	436	436	0	1.4512	1.6441	67.069	5	0	Median	1.5928	1.7335	21.957	3	0	Median	0.65535	0.5828	8.463	3	1	Median	10.8	10.8	100650000	48077000	52575000	56607000	21063000
P34221	P34221	3	1	1	Protein phosphatase 2C homolog 3	PTC3	>sp|P34221|PP2C3_YEAST Protein phosphatase 2C homolog 3 OS=Saccharomyces cerevisiae (strain ATCC 204508 / S288c) GN=PTC3 PE=1 SV=4	1	3	1	1	2	2	1	0	1	0	6.6	2.4	2.4	51.331	468	468	0.0017437	NaN	NaN	NaN	1	1	Median	NaN	NaN	NaN	1	1	Median	NaN	NaN	NaN	0	0	Median	4.1	4.3	69059000	33085000	35974000	69059000	33085000
P34222	P34222	2	2	2	Peptidyl-tRNA hydrolase 2	PTH2	>sp|P34222|PTH2_YEAST Peptidyl-tRNA hydrolase 2 OS=Saccharomyces cerevisiae (strain ATCC 204508 / S288c) GN=PTH2 PE=1 SV=2	1	2	2	2	1	2	1	2	1	2	8.7	8.7	8.7	22.435	208	208	0	1.5704	1.5484	39.024	3	0	Median	NaN	NaN	NaN	1	0	Median	1.3584	1.1448	42.7	2	0	Median	3.8	8.7	139470000	58990000	80480000	46253000	16864000
P34227	P34227	7	7	7	Mitochondrial peroxiredoxin PRX1	PRX1	>sp|P34227|PRX1_YEAST Mitochondrial peroxiredoxin PRX1 OS=Saccharomyces cerevisiae (strain ATCC 204508 / S288c) GN=PRX1 PE=1 SV=1	1	7	7	7	7	5	7	5	7	5	28.7	28.7	28.7	29.495	261	261	0	1.1768	0.94553	42.499	9	0	Median	0.93609	1.0776	42.808	6	0	Median	1.1834	0.94553	34.644	3	0	Median	28.7	20.3	1067900000	529370000	538530000	595060000	298890000
P34237	P34237	1	1	1	Protein CASP	COY1	>sp|P34237|CASP_YEAST Protein CASP OS=Saccharomyces cerevisiae (strain ATCC 204508 / S288c) GN=COY1 PE=1 SV=2	1	1	1	1	1	1	1	1	1	1	2.1	2.1	2.1	77.513	679	679	0	0.78034	0.76852	2.235	2	2	Median	NaN	NaN	NaN	1	1	Median	NaN	NaN	NaN	1	1	Median	2.1	2.1	42898000	22420000	20478000	21781000	12994000
P34244	P34244	1	1	1	Probable serine/threonine-protein kinase HSL1	HSL1	>sp|P34244|HSL1_YEAST Probable serine/threonine-protein kinase HSL1 OS=Saccharomyces cerevisiae (strain ATCC 204508 / S288c) GN=HSL1 PE=1 SV=2	1	1	1	1	1	1	1	1	1	1	0.7	0.7	0.7	169.6	1518	1518	0.0098039	0.98148	0.94787	7.4539	4	0	Median	0.78553	0.91688	7.1905	2	0	Median	1.2053	0.98522	7.9561	2	0	Median	0.7	0.7	1018100000	503650000	514500000	506530000	275560000
P34730	P34730	14	14	5	Protein BMH2	BMH2	>sp|P34730|BMH2_YEAST Protein BMH2 OS=Saccharomyces cerevisiae (strain ATCC 204508 / S288c) GN=BMH2 PE=1 SV=3	1	14	14	5	13	13	13	13	4	5	44.3	44.3	14.3	31.061	273	273	0	1.0684	1.0501	53.463	28	0	Median	1.2228	1.4234	45.164	13	0	Median	0.89729	0.77561	33.55	15	0	Median	44.3	35.9	10484000000	4842100000	5642000000	5153600000	2367000000
P34760;Q04120	P34760	11;1	11;1	11;1	Peroxiredoxin TSA1	TSA1	>sp|P34760|TSA1_YEAST Peroxiredoxin TSA1 OS=Saccharomyces cerevisiae (strain ATCC 204508 / S288c) GN=TSA1 PE=1 SV=3	2	11	11	11	11	9	11	9	11	9	52	52	52	21.589	196	196;196	0	1.0043	1.0009	58.027	20	0	Median	1.0398	1.1608	52.242	11	0	Median	0.83681	0.73658	41.999	9	0	Median	52	51	4856700000	2459300000	2397400000	2342300000	1223800000
P35176	P35176	1	1	1	Peptidyl-prolyl cis-trans isomerase D	CPR5	>sp|P35176|CYPD_YEAST Peptidyl-prolyl cis-trans isomerase D OS=Saccharomyces cerevisiae (strain ATCC 204508 / S288c) GN=CPR5 PE=1 SV=1	1	1	1	1	1	1	1	1	1	1	6.7	6.7	6.7	25.326	225	225	0	1.247	1.2413	26.77	2	0	Median	NaN	NaN	NaN	1	0	Median	NaN	NaN	NaN	1	0	Median	6.7	6.7	50483000	23527000	26956000	28940000	13587000
P35179	P35179	2	2	2	Protein transport protein SSS1	SSS1	>sp|P35179|SC61G_YEAST Protein transport protein SSS1 OS=Saccharomyces cerevisiae (strain ATCC 204508 / S288c) GN=SSS1 PE=1 SV=2	1	2	2	2	2	2	2	2	2	2	22.5	22.5	22.5	8.9435	80	80	0	0.79301	0.92585	14.976	3	0	Median	0.77893	0.90591	3.0805	2	0	Median	1.822	1.5071	35.692	2	1	Median	22.5	22.5	1314900000	549810000	765040000	640530000	316830000
P35180	P35180	2	2	2	Mitochondrial import receptor subunit TOM20	TOM20	>sp|P35180|TOM20_YEAST Mitochondrial import receptor subunit TOM20 OS=Saccharomyces cerevisiae (strain ATCC 204508 / S288c) GN=TOM20 PE=1 SV=1	1	2	2	2	2	1	2	1	2	1	16.4	16.4	16.4	20.317	183	183	0	0.76128	0.87654	15.696	4	0	Median	0.69997	0.80677	10.985	3	0	Median	NaN	NaN	NaN	1	0	Median	16.4	7.1	470780000	258570000	212220000	331760000	196210000
P35191	P35191	1	1	1	DnaJ homolog 1, mitochondrial	MDJ1	>sp|P35191|MDJ1_YEAST DnaJ homolog 1, mitochondrial OS=Saccharomyces cerevisiae (strain ATCC 204508 / S288c) GN=MDJ1 PE=1 SV=1	1	1	1	1	1	0	1	0	1	0	2.2	2.2	2.2	55.56	511	511	0.0058824	NaN	NaN	NaN	1	0	Median	NaN	NaN	NaN	1	0	Median	NaN	NaN	NaN	0	0	Median	2.2	0	24153000	10773000	13380000	24153000	10773000
P35691	P35691	11	11	11	Translationally-controlled tumor protein homolog	TMA19	>sp|P35691|TCTP_YEAST Translationally-controlled tumor protein homolog OS=Saccharomyces cerevisiae (strain ATCC 204508 / S288c) GN=TMA19 PE=1 SV=1	1	11	11	11	10	9	10	9	10	9	48.5	48.5	48.5	18.741	167	167	0	1.0492	1.0743	44.693	25	0	Median	1.0679	1.2353	28.231	12	0	Median	0.88575	0.7513	41.558	13	0	Median	48.5	38.3	3949500000	1951900000	1997600000	1796800000	875790000
P35723	P35723	3	3	3	Endoplasmic reticulum transmembrane protein 1	YET1	>sp|P35723|YET1_YEAST Endoplasmic reticulum transmembrane protein 1 OS=Saccharomyces cerevisiae (strain ATCC 204508 / S288c) GN=YET1 PE=1 SV=2	1	3	3	3	2	3	2	3	2	3	13.1	13.1	13.1	23.459	206	206	0	1.1552	0.95996	50.787	4	0	Median	1.0758	1.2053	69.18	2	0	Median	1.2769	1.1301	34.992	3	1	Median	13.1	13.1	691140000	340820000	350320000	303960000	176830000
P35844	P35844	6	6	6	Protein KES1	KES1	>sp|P35844|KES1_YEAST Protein KES1 OS=Saccharomyces cerevisiae (strain ATCC 204508 / S288c) GN=KES1 PE=1 SV=1	1	6	6	6	3	6	3	6	3	6	15.7	15.7	15.7	49.491	434	434	0	1.0052	1.0036	28.718	7	0	Median	1.0052	1.2292	17.867	3	0	Median	1.0005	0.81728	25.091	4	0	Median	8.5	15.7	531440000	256740000	274700000	213690000	103790000
P35996	P35996	1	1	1	54S ribosomal protein L38, mitochondrial;54S ribosomal protein L34, mitochondrial	MRPL38	>sp|P35996|RM38_YEAST 54S ribosomal protein L38, mitochondrial OS=Saccharomyces cerevisiae (strain ATCC 204508 / S288c) GN=MRPL38 PE=1 SV=1	1	1	1	1	1	0	1	0	1	0	10.1	10.1	10.1	14.904	138	138	0.0042553	NaN	NaN	NaN	1	1	Median	NaN	NaN	NaN	1	1	Median	NaN	NaN	NaN	0	0	Median	10.1	0	34994000	22537000	12457000	34994000	22537000
P38711;P35997	P38711;P35997	6;6	6;6	6;6	40S ribosomal protein S27-B;40S ribosomal protein S27-A	RPS27B;RPS27A	>sp|P38711|RS27B_YEAST 40S ribosomal protein S27-B OS=Saccharomyces cerevisiae (strain ATCC 204508 / S288c) GN=RPS27B PE=1 SV=1;>sp|P35997|RS27_YEAST 40S ribosomal protein S27-A OS=Saccharomyces cerevisiae (strain ATCC 204508 / S288c) GN=RPS27A PE=1 SV=1	2	6	6	6	6	6	6	6	6	6	52.4	52.4	52.4	8.8653	82	82;82	0	1.0042	0.94004	45.151	12	0	Median	1.2371	1.4165	33.009	6	0	Median	0.88709	0.74597	31.259	6	0	Median	52.4	52.4	39851000000	20023000000	19828000000	18575000000	9771800000
P36008	P36008	12	12	10	Elongation factor 1-gamma 2	TEF4	>sp|P36008|EF1G2_YEAST Elongation factor 1-gamma 2 OS=Saccharomyces cerevisiae (strain ATCC 204508 / S288c) GN=TEF4 PE=1 SV=1	1	12	12	10	11	11	11	11	9	9	22.6	22.6	20.1	46.52	412	412	0	0.9653	0.9418	33.746	17	0	Median	0.92781	1.0436	24.779	8	0	Median	0.9653	0.76295	41.341	9	0	Median	22.6	20.4	2535800000	1248700000	1287100000	1263700000	637990000
P36010	P36010	6	6	6	Nucleoside diphosphate kinase	YNK1	>sp|P36010|NDK_YEAST Nucleoside diphosphate kinase OS=Saccharomyces cerevisiae (strain ATCC 204508 / S288c) GN=YNK1 PE=1 SV=1	1	6	6	6	4	6	4	6	4	6	41.2	41.2	41.2	17.166	153	153	0	0.78517	0.87955	24.83	12	0	Median	0.79259	0.9178	19.228	5	0	Median	0.77775	0.65911	25.195	7	0	Median	28.8	41.2	1438800000	755320000	683470000	684770000	368120000
P36013	P36013	7	7	7	NAD-dependent malic enzyme, mitochondrial	MAE1	>sp|P36013|MAOM_YEAST NAD-dependent malic enzyme, mitochondrial OS=Saccharomyces cerevisiae (strain ATCC 204508 / S288c) GN=MAE1 PE=1 SV=1	1	7	7	7	6	4	6	4	6	4	15.7	15.7	15.7	74.375	669	669	0	1.0027	1.0763	61.11	11	0	Median	1.1372	1.2736	43.849	6	0	Median	0.68377	0.59218	42.808	5	0	Median	12.7	10	744920000	359610000	385310000	404760000	176430000
P36017	P36017	2	2	2	Vacuolar protein sorting-associated protein 21	VPS21	>sp|P36017|VPS21_YEAST Vacuolar protein sorting-associated protein 21 OS=Saccharomyces cerevisiae (strain ATCC 204508 / S288c) GN=VPS21 PE=1 SV=1	1	2	2	2	1	1	1	1	1	1	9.5	9.5	9.5	23.081	210	210	0.0058528	0.89773	0.87643	32.734	2	0	Median	NaN	NaN	NaN	1	0	Median	NaN	NaN	NaN	1	0	Median	4.8	4.8	33967000	16577000	17391000	11521000	6978100
P36018	P36018	1	1	1	GTP-binding protein YPT52	YPT52	>sp|P36018|YPT52_YEAST GTP-binding protein YPT52 OS=Saccharomyces cerevisiae (strain ATCC 204508 / S288c) GN=YPT52 PE=1 SV=1	1	1	1	1	1	0	1	0	1	0	8.1	8.1	8.1	26.132	234	234	0.00089767	NaN	NaN	NaN	1	1	Median	NaN	NaN	NaN	1	1	Median	NaN	NaN	NaN	0	0	Median	8.1	0	8169500	3839100	4330400	8169500	3839100
P36036	P36036	3	3	3	RNA annealing protein YRA2	YRA2	>sp|P36036|YRA2_YEAST RNA annealing protein YRA2 OS=Saccharomyces cerevisiae (strain ATCC 204508 / S288c) GN=YRA2 PE=1 SV=1	1	3	3	3	3	2	3	2	3	2	15.3	15.3	15.3	23.777	203	203	0	1.089	0.99213	18.507	7	0	Median	0.84911	0.96495	23.007	4	0	Median	1.2297	1.0919	14.932	3	0	Median	15.3	8.4	362230000	164730000	197500000	178490000	86942000
P36046	P36046	3	3	3	Mitochondrial intermembrane space import and assembly protein 40	MIA40	>sp|P36046|MIA40_YEAST Mitochondrial intermembrane space import and assembly protein 40 OS=Saccharomyces cerevisiae (strain ATCC 204508 / S288c) GN=MIA40 PE=1 SV=2	1	3	3	3	2	2	2	2	2	2	8.2	8.2	8.2	44.536	403	403	0	0.88762	0.99844	24.583	4	0	Median	0.88762	0.99844	2.878	2	0	Median	0.96559	0.83504	38.54	2	0	Median	6.9	4.7	276140000	148570000	127570000	75438000	41185000
P36049	P36049	3	3	3	rRNA-processing protein EBP2	EBP2	>sp|P36049|EBP2_YEAST rRNA-processing protein EBP2 OS=Saccharomyces cerevisiae (strain ATCC 204508 / S288c) GN=EBP2 PE=1 SV=1	1	3	3	3	2	3	2	3	2	3	8.7	8.7	8.7	49.734	427	427	0	1.0917	0.88859	24.581	7	0	Median	0.6282	0.71845	9.8028	3	0	Median	1.303	1.1144	13.032	4	0	Median	4.9	8.7	350030000	189670000	160350000	210870000	127670000
P36056	P36056	1	1	1	37S ribosomal protein S22, mitochondrial	RSM22	>sp|P36056|RT22_YEAST 37S ribosomal protein S22, mitochondrial OS=Saccharomyces cerevisiae (strain ATCC 204508 / S288c) GN=RSM22 PE=1 SV=1	1	1	1	1	0	1	0	1	0	1	2.4	2.4	2.4	72.189	628	628	0.0050633	NaN	NaN	NaN	1	1	Median	NaN	NaN	NaN	0	0	Median	NaN	NaN	NaN	1	1	Median	0	2.4	21506000	9042200	12463000	0	0
P36059	P36059	5	5	5	ATP-dependent (S)-NAD(P)H-hydrate dehydratase		>sp|P36059|NNRD_YEAST ATP-dependent (S)-NAD(P)H-hydrate dehydratase OS=Saccharomyces cerevisiae (strain ATCC 204508 / S288c) GN=YKL151C PE=1 SV=1	1	5	5	5	5	5	5	5	5	5	13.4	13.4	13.4	37.357	337	337	0	1.0192	0.88698	24.806	11	0	Median	0.92575	1.0712	33.113	5	0	Median	1.056	0.85893	13.338	6	0	Median	13.4	13.4	640720000	301350000	339370000	266940000	128690000
P36060	P36060	5	5	5	NADH-cytochrome b5 reductase 2;NADH-cytochrome b5 reductase p34 form;NADH-cytochrome b5 reductase p32 form	MCR1	>sp|P36060|MCR1_YEAST NADH-cytochrome b5 reductase 2 OS=Saccharomyces cerevisiae (strain ATCC 204508 / S288c) GN=MCR1 PE=1 SV=1	1	5	5	5	4	3	4	3	4	3	14.9	14.9	14.9	34.137	302	302	0	1.087	1.1572	47.009	6	0	Median	1.224	1.3976	18.549	3	0	Median	0.6991	0.60394	47.127	3	0	Median	12.3	11.9	463400000	209450000	253950000	288460000	117780000
P36080	P36080	3	3	3	Ribosomal RNA-processing protein 14	RRP14	>sp|P36080|RRP14_YEAST Ribosomal RNA-processing protein 14 OS=Saccharomyces cerevisiae (strain ATCC 204508 / S288c) GN=RRP14 PE=1 SV=1	1	3	3	3	1	3	1	3	1	3	6	6	6	50.481	434	434	0	0.85378	0.69849	83.084	3	2	Median	NaN	NaN	NaN	1	1	Median	1.3637	1.1502	70.531	2	1	Median	2.1	6	82233000	40608000	41625000	28456000	20747000
P36081	P36081	4	4	4	Uncharacterized protein YKL077W	YKL077W	>sp|P36081|YKH7_YEAST Uncharacterized protein YKL077W OS=Saccharomyces cerevisiae (strain ATCC 204508 / S288c) GN=YKL077W PE=1 SV=1	1	4	4	4	4	3	4	3	4	3	8.7	8.7	8.7	46.036	392	392	0	1.1714	1.1615	28.689	6	0	Median	1.1302	1.2859	27.488	3	0	Median	1.2915	1.0491	34.007	3	0	Median	8.7	5.6	409140000	190870000	218270000	226380000	108630000
P36102	P36102	1	1	1	PAB-dependent poly(A)-specific ribonuclease subunit PAN3	PAN3	>sp|P36102|PAN3_YEAST PAB-dependent poly(A)-specific ribonuclease subunit PAN3 OS=Saccharomyces cerevisiae (strain ATCC 204508 / S288c) GN=PAN3 PE=1 SV=1	1	1	1	1	1	1	1	1	1	1	1.5	1.5	1.5	76.454	679	679	0.0074751	1.5373	1.5921	2.5385	2	0	Median	NaN	NaN	NaN	1	0	Median	NaN	NaN	NaN	1	0	Median	1.5	1.5	80243000	24948000	55295000	38121000	12940000
P36103	P36103	2	2	2	Uncharacterized protein YKL023W	YKL023W	>sp|P36103|YKC3_YEAST Uncharacterized protein YKL023W OS=Saccharomyces cerevisiae (strain ATCC 204508 / S288c) GN=YKL023W PE=1 SV=2	1	2	2	2	2	0	2	0	2	0	2.9	2.9	2.9	32.293	277	277	0.0097087	0.72179	0.82102	37.028	2	0	Median	0.72179	0.82102	37.028	2	0	Median	NaN	NaN	NaN	0	0	Median	2.9	0	180700000	90479000	90222000	180700000	90479000
P36112	P36112	11	11	11	Formation of crista junctions protein 1	FCJ1	>sp|P36112|FCJ1_YEAST Formation of crista junctions protein 1 OS=Saccharomyces cerevisiae (strain ATCC 204508 / S288c) GN=FCJ1 PE=1 SV=1	1	11	11	11	10	9	10	9	10	9	24.3	24.3	24.3	61.081	540	540	0	0.90296	0.90426	36.92	16	0	Median	0.94011	1.0742	36.871	8	0	Median	0.90296	0.76063	26.446	8	0	Median	24.1	19.3	938480000	482290000	456190000	519050000	259200000
P36114	P36114	2	2	2	Mitochondrial outer membrane protein YKR018C	YKR018C	>sp|P36114|YKR18_YEAST Mitochondrial outer membrane protein YKR018C OS=Saccharomyces cerevisiae (strain ATCC 204508 / S288c) GN=YKR018C PE=1 SV=1	1	2	2	2	1	1	1	1	1	1	3.7	3.7	3.7	81.753	725	725	0	1.0867	1.0817	20.358	2	0	Median	NaN	NaN	NaN	1	0	Median	NaN	NaN	NaN	1	0	Median	1.9	1.8	69352000	32830000	36522000	43809000	21614000
P36123	P36123	1	1	1	SIT4-associating protein SAP190	SAP190	>sp|P36123|SA190_YEAST SIT4-associating protein SAP190 OS=Saccharomyces cerevisiae (strain ATCC 204508 / S288c) GN=SAP190 PE=1 SV=2	1	1	1	1	1	1	1	1	1	1	1.3	1.3	1.3	117.1	1033	1033	0	1.2061	1.1577	14.542	2	0	Median	NaN	NaN	NaN	1	0	Median	NaN	NaN	NaN	1	0	Median	1.3	1.3	39873000	16535000	23338000	18840000	8765000
P36136	P36136	2	2	2	Sedoheptulose 1,7-bisphosphatase	SHB17	>sp|P36136|SHB17_YEAST Sedoheptulose 1,7-bisphosphatase OS=Saccharomyces cerevisiae (strain ATCC 204508 / S288c) GN=SHB17 PE=1 SV=1	1	2	2	2	1	2	1	2	1	2	11.1	11.1	11.1	31.022	271	271	0	0.83453	0.96635	41.841	3	0	Median	NaN	NaN	NaN	1	0	Median	0.82375	0.69949	52.963	2	0	Median	5.5	11.1	96641000	52896000	43745000	33784000	18449000
P36139	P36139	10	10	10	Protein PET10	PET10	>sp|P36139|PET10_YEAST Protein PET10 OS=Saccharomyces cerevisiae (strain ATCC 204508 / S288c) GN=PET10 PE=1 SV=3	1	10	10	10	9	9	9	9	9	9	40.6	40.6	40.6	31.246	283	283	0	1.0149	0.99507	18.808	16	0	Median	0.88775	0.99507	14.12	8	0	Median	1.2702	1.0391	23.147	8	0	Median	39.9	30	2745200000	1343900000	1401200000	1347700000	701500000
P36141	P36141	1	1	1	Putative redox protein FMP46, mitochondrial	FMP46	>sp|P36141|FMP46_YEAST Putative redox protein FMP46, mitochondrial OS=Saccharomyces cerevisiae (strain ATCC 204508 / S288c) GN=FMP46 PE=1 SV=1	1	1	1	1	1	1	1	1	1	1	9	9	9	15.65	133	133	0	1.1734	1.1309	2.273	2	0	Median	NaN	NaN	NaN	1	0	Median	NaN	NaN	NaN	1	0	Median	9	9	55736000	26858000	28878000	28082000	13681000
P36148	P36148	5	5	5	Glycerol-3-phosphate O-acyltransferase 2	GPT2	>sp|P36148|GPT2_YEAST Glycerol-3-phosphate O-acyltransferase 2 OS=Saccharomyces cerevisiae (strain ATCC 204508 / S288c) GN=GPT2 PE=1 SV=1	1	5	5	5	4	4	4	4	4	4	10.1	10.1	10.1	83.644	743	743	0	1.1592	1.0544	42.168	9	0	Median	0.85906	0.97859	36.588	4	0	Median	1.2358	1.0916	48.634	5	0	Median	8.2	7.9	222630000	113630000	109010000	91960000	48767000
P36421	P36421	3	3	3	Tyrosine--tRNA ligase, cytoplasmic	TYS1	>sp|P36421|SYYC_YEAST Tyrosine--tRNA ligase, cytoplasmic OS=Saccharomyces cerevisiae (strain ATCC 204508 / S288c) GN=TYS1 PE=1 SV=3	1	3	3	3	2	3	2	3	2	3	10.7	10.7	10.7	44.019	394	394	0	1.1063	1.0131	22.219	4	0	Median	1.0043	1.0652	27.754	2	0	Median	0.86661	0.75078	28.017	4	2	Median	6.9	10.7	98773000	49450000	49323000	40685000	20090000
P36516	P36516	3	3	3	54S ribosomal protein L3, mitochondrial	MRPL3	>sp|P36516|RM03_YEAST 54S ribosomal protein L3, mitochondrial OS=Saccharomyces cerevisiae (strain ATCC 204508 / S288c) GN=MRPL3 PE=1 SV=2	1	3	3	3	3	2	3	2	3	2	8.2	8.2	8.2	43.999	390	390	0	1.1285	1.0916	9.4545	4	0	Median	0.97136	1.0561	32.969	3	1	Median	1.5595	1.3547	21.28	4	2	Median	8.2	5.9	547890000	258580000	289320000	229670000	118400000
P36517	P36517	1	1	1	54S ribosomal protein L4, mitochondrial	MRPL4	>sp|P36517|RM04_YEAST 54S ribosomal protein L4, mitochondrial OS=Saccharomyces cerevisiae (strain ATCC 204508 / S288c) GN=MRPL4 PE=1 SV=2	1	1	1	1	1	1	1	1	1	1	4.1	4.1	4.1	36.964	319	319	0	0.92968	0.97792	1.4098	2	0	Median	NaN	NaN	NaN	1	0	Median	NaN	NaN	NaN	1	0	Median	4.1	4.1	86913000	44757000	42156000	38779000	21859000
P36521	P36521	1	1	1	54S ribosomal protein L11, mitochondrial	MRPL11	>sp|P36521|RM11_YEAST 54S ribosomal protein L11, mitochondrial OS=Saccharomyces cerevisiae (strain ATCC 204508 / S288c) GN=MRPL11 PE=1 SV=2	1	1	1	1	0	1	0	1	0	1	5.6	5.6	5.6	28.515	249	249	0	NaN	NaN	NaN	1	0	Median	NaN	NaN	NaN	0	0	Median	NaN	NaN	NaN	1	0	Median	0	5.6	22086000	8944300	13142000	0	0
P36525	P36525	5	5	5	54S ribosomal protein L24, mitochondrial	MRPL24	>sp|P36525|RM24_YEAST 54S ribosomal protein L24, mitochondrial OS=Saccharomyces cerevisiae (strain ATCC 204508 / S288c) GN=MRPL24 PE=1 SV=2	1	5	5	5	5	5	5	5	5	5	24.4	24.4	24.4	30.049	258	258	0	0.97694	1.0768	34.833	9	0	Median	0.97694	1.0768	28.443	5	0	Median	1.1005	0.96307	46.373	4	0	Median	24.4	24.4	308980000	146970000	162010000	156030000	81301000
P36526	P36526	1	1	1	54S ribosomal protein L27, mitochondrial	MRPL27	>sp|P36526|RM27_YEAST 54S ribosomal protein L27, mitochondrial OS=Saccharomyces cerevisiae (strain ATCC 204508 / S288c) GN=MRPL27 PE=1 SV=2	1	1	1	1	1	1	1	1	1	1	6.2	6.2	6.2	16.492	146	146	0	1.3151	1.2905	60.754	2	1	Median	NaN	NaN	NaN	1	0	Median	NaN	NaN	NaN	1	1	Median	6.2	6.2	89780000	41864000	47915000	44829000	16892000
P36527	P36527	1	1	1	54S ribosomal protein L28, mitochondrial	MRPL28	>sp|P36527|RM28_YEAST 54S ribosomal protein L28, mitochondrial OS=Saccharomyces cerevisiae (strain ATCC 204508 / S288c) GN=MRPL28 PE=1 SV=2	1	1	1	1	1	1	1	1	1	1	6.8	6.8	6.8	17.342	147	147	0	1.3102	1.2686	57.212	2	1	Median	NaN	NaN	NaN	1	0	Median	NaN	NaN	NaN	1	1	Median	6.8	6.8	188470000	96661000	91806000	95702000	61846000
P36528	P36528	3	3	3	54S ribosomal protein L17, mitochondrial	MRPL17	>sp|P36528|RM17_YEAST 54S ribosomal protein L17, mitochondrial OS=Saccharomyces cerevisiae (strain ATCC 204508 / S288c) GN=MRPL17 PE=1 SV=2	1	3	3	3	2	2	2	2	2	2	8.2	8.2	8.2	32.212	281	281	0.0058577	1.3404	1.21	46.394	3	0	Median	NaN	NaN	NaN	1	0	Median	1.5303	1.3592	16.435	2	0	Median	5	5.7	77787000	47760000	30027000	38950000	32208000
P36531	P36531	2	2	2	54S ribosomal protein L36, mitochondrial	MRPL36	>sp|P36531|RM36_YEAST 54S ribosomal protein L36, mitochondrial OS=Saccharomyces cerevisiae (strain ATCC 204508 / S288c) GN=MRPL36 PE=1 SV=3	1	2	2	2	2	0	2	0	2	0	11.9	11.9	11.9	20.09	177	177	0	0.9824	1.1316	3.5462	2	1	Median	0.9824	1.1316	3.5462	2	1	Median	NaN	NaN	NaN	0	0	Median	11.9	0	83600000	43626000	39974000	83600000	43626000
P36532	P36532	1	1	1	54S ribosomal protein L37, mitochondrial	MRPL37	>sp|P36532|RM37_YEAST 54S ribosomal protein L37, mitochondrial OS=Saccharomyces cerevisiae (strain ATCC 204508 / S288c) GN=MRPL37 PE=1 SV=2	1	1	1	1	1	1	1	1	1	1	9.5	9.5	9.5	11.949	105	105	0.0042845	0.93239	0.92411	14.034	2	0	Median	NaN	NaN	NaN	1	0	Median	NaN	NaN	NaN	1	0	Median	9.5	9.5	196010000	106760000	89251000	97352000	53511000
P36533	P36533	2	2	2	54S ribosomal protein L39, mitochondrial	MRPL39	>sp|P36533|RM39_YEAST 54S ribosomal protein L39, mitochondrial OS=Saccharomyces cerevisiae (strain ATCC 204508 / S288c) GN=MRPL39 PE=1 SV=3	1	2	2	2	1	2	1	2	1	2	28.6	28.6	28.6	7.9725	70	70	0	1.5713	1.5167	91.879	2	1	Median	NaN	NaN	NaN	1	0	Median	NaN	NaN	NaN	1	1	Median	12.9	28.6	280410000	106280000	174130000	126450000	71422000
P36534	P36534	4	4	4	54S ribosomal protein L40, mitochondrial	MRPL40	>sp|P36534|RM40_YEAST 54S ribosomal protein L40, mitochondrial OS=Saccharomyces cerevisiae (strain ATCC 204508 / S288c) GN=MRPL40 PE=1 SV=2	1	4	4	4	3	3	3	3	3	3	18.9	18.9	18.9	33.751	297	297	0	1.1607	1.0298	26.493	4	0	Median	0.91703	1.0232	41.634	2	0	Median	1.2319	1.0298	19.284	2	0	Median	13.8	13.8	161150000	79058000	82088000	80202000	40100000
P37012	P37012	7	7	6	Phosphoglucomutase-2	PGM2	>sp|P37012|PGM2_YEAST Phosphoglucomutase-2 OS=Saccharomyces cerevisiae (strain ATCC 204508 / S288c) GN=PGM2 PE=1 SV=1	1	7	7	6	6	7	6	7	5	6	12.5	12.5	11.1	63.088	569	569	0	1.1733	0.94592	36.699	13	0	Median	0.77766	0.91635	29.776	5	0	Median	1.3204	1.1228	39.259	8	0	Median	10.7	12.5	3167600000	1370900000	1796700000	1127900000	641400000
P37262	P37262	2	2	2	6-phosphogluconolactonase-like protein 2	SOL2	>sp|P37262|SOL2_YEAST 6-phosphogluconolactonase-like protein 2 OS=Saccharomyces cerevisiae (strain ATCC 204508 / S288c) GN=SOL2 PE=1 SV=2	1	2	2	2	2	0	2	0	2	0	10.2	10.2	10.2	34.501	315	315	0	0.74444	0.82979	0.78818	2	0	Median	0.74444	0.82979	0.78818	2	0	Median	NaN	NaN	NaN	0	0	Median	10.2	0	28711000	18125000	10586000	28711000	18125000
P37263	P37263	1	1	1	UPF0743 protein YCR087C-A		>sp|P37263|YC16_YEAST UPF0743 protein YCR087C-A OS=Saccharomyces cerevisiae (strain ATCC 204508 / S288c) GN=YCR087C-A PE=1 SV=1	1	1	1	1	1	0	1	0	1	0	7.2	7.2	7.2	17.738	153	153	0.0042445	NaN	NaN	NaN	1	1	Median	NaN	NaN	NaN	1	1	Median	NaN	NaN	NaN	0	0	Median	7.2	0	81307000	42718000	38589000	81307000	42718000
P37267	P37267	5	5	5	Assembly factor CBP4	CBP4	>sp|P37267|CBP4_YEAST Assembly factor CBP4 OS=Saccharomyces cerevisiae (strain ATCC 204508 / S288c) GN=CBP4 PE=1 SV=3	1	5	5	5	3	5	3	5	3	5	31.3	31.3	31.3	17.532	147	147	0	0.93937	1.0176	26.948	9	0	Median	0.97876	1.1243	7.6616	4	0	Median	0.90374	0.77049	29.394	5	0	Median	23.8	31.3	881070000	468660000	412410000	347780000	180080000
P37291	P37291	22	21	21	Serine hydroxymethyltransferase, cytosolic	SHM2	>sp|P37291|GLYC_YEAST Serine hydroxymethyltransferase, cytosolic OS=Saccharomyces cerevisiae (strain ATCC 204508 / S288c) GN=SHM2 PE=1 SV=2	1	22	21	21	21	19	20	18	20	18	46.3	44.8	44.8	52.218	469	469	0	0.99116	0.99824	47.034	47	0	Median	1.0449	1.1897	29.955	24	0	Median	0.86183	0.75393	47	23	0	Median	43.1	43.9	11161000000	5599400000	5562000000	5655000000	2730300000
P37292	P37292	32	32	31	Serine hydroxymethyltransferase, mitochondrial	SHM1	>sp|P37292|GLYM_YEAST Serine hydroxymethyltransferase, mitochondrial OS=Saccharomyces cerevisiae (strain ATCC 204508 / S288c) GN=SHM1 PE=1 SV=2	1	32	32	31	29	31	29	31	28	30	48.4	48.4	48.4	53.686	490	490	0	0.41936	0.32798	172.82	49	0	Median	4.5007	5.0908	52.475	20	0	Median	0.24211	0.20248	54.371	29	0	Median	48.2	48.4	12429000000	5825600000	6603600000	6180700000	1219300000
P37296	P37296	2	2	2	V-type proton ATPase subunit a, Golgi isoform	STV1	>sp|P37296|STV1_YEAST V-type proton ATPase subunit a, Golgi isoform OS=Saccharomyces cerevisiae (strain ATCC 204508 / S288c) GN=STV1 PE=1 SV=2	1	2	2	2	2	1	2	1	2	1	2.5	2.5	2.5	101.66	890	890	0	0.86589	1.0226	19.911	3	0	Median	0.78735	0.89912	18.202	2	0	Median	NaN	NaN	NaN	1	0	Median	2.5	1.2	77098000	40061000	37037000	57666000	32075000
P37299	P37299	2	2	2	Cytochrome b-c1 complex subunit 10	QCR10	>sp|P37299|QCR10_YEAST Cytochrome b-c1 complex subunit 10 OS=Saccharomyces cerevisiae (strain ATCC 204508 / S288c) GN=QCR10 PE=1 SV=2	1	2	2	2	2	1	2	1	2	1	36.4	36.4	36.4	8.5928	77	77	0	0.91924	0.9941	49.711	3	0	Median	1.2409	1.4452	62.305	3	1	Median	NaN	NaN	NaN	1	0	Median	36.4	11.7	686520000	279070000	407450000	599060000	228620000
P37302	P37302	4	4	4	Aminopeptidase Y	APE3	>sp|P37302|APE3_YEAST Aminopeptidase Y OS=Saccharomyces cerevisiae (strain ATCC 204508 / S288c) GN=APE3 PE=1 SV=1	1	4	4	4	2	3	2	3	2	3	9.5	9.5	9.5	60.137	537	537	0	0.86156	0.7567	42.533	5	3	Median	0.60892	0.68848	13.363	2	1	Median	1.2404	0.99553	48.171	3	2	Median	3.9	6.9	644540000	316330000	328220000	304310000	178890000
P37838	P37838	5	5	5	Nucleolar protein 4	NOP4	>sp|P37838|NOP4_YEAST Nucleolar protein 4 OS=Saccharomyces cerevisiae (strain ATCC 204508 / S288c) GN=NOP4 PE=1 SV=1	1	5	5	5	2	4	2	4	2	4	8.2	8.2	8.2	77.824	685	685	0	1.2678	1.0585	72.561	6	4	Median	0.44041	0.51486	10.535	2	1	Median	1.7455	1.4583	54.99	4	3	Median	2.8	6.6	193590000	92093000	101490000	54380000	38563000
P38009	P38009	20	20	16	Bifunctional purine biosynthesis protein ADE17;Phosphoribosylaminoimidazolecarboxamide formyltransferase;IMP cyclohydrolase	ADE17	>sp|P38009|PUR92_YEAST Bifunctional purine biosynthesis protein ADE17 OS=Saccharomyces cerevisiae (strain ATCC 204508 / S288c) GN=ADE17 PE=1 SV=2	1	20	20	16	15	18	15	18	11	15	41	41	33.8	65.262	592	592	0	0.95731	0.94031	52.268	23	0	Median	0.95731	1.113	51.584	11	0	Median	0.87743	0.74916	33.142	12	0	Median	31.9	33.8	2999000000	1567000000	1432000000	1375000000	720820000
P38011	P38011	17	17	17	Guanine nucleotide-binding protein subunit beta-like protein	ASC1	>sp|P38011|GBLP_YEAST Guanine nucleotide-binding protein subunit beta-like protein OS=Saccharomyces cerevisiae (strain ATCC 204508 / S288c) GN=ASC1 PE=1 SV=4	1	17	17	17	13	15	13	15	13	15	69.6	69.6	69.6	34.805	319	319	0	0.92079	0.95494	33.479	28	0	Median	1.0363	1.2112	24.138	11	0	Median	0.88578	0.74796	32.204	17	0	Median	53	62.4	5053800000	2523100000	2530700000	2292000000	1137900000
P38013	P38013	8	8	8	Peroxiredoxin type-2	AHP1	>sp|P38013|AHP1_YEAST Peroxiredoxin type-2 OS=Saccharomyces cerevisiae (strain ATCC 204508 / S288c) GN=AHP1 PE=1 SV=4	1	8	8	8	7	7	7	7	7	7	57.4	57.4	57.4	19.114	176	176	0	1.0021	1.0182	65.599	11	0	Median	1.2387	1.3445	37.538	6	0	Median	0.98062	0.82032	57.429	5	0	Median	57.4	53.4	2093100000	980270000	1112800000	995690000	451460000
P38061	P38061	22	22	22	60S ribosomal protein L32	RPL32	>sp|P38061|RL32_YEAST 60S ribosomal protein L32 OS=Saccharomyces cerevisiae (strain ATCC 204508 / S288c) GN=RPL32 PE=1 SV=1	1	22	22	22	21	19	21	19	21	19	83.8	83.8	83.8	14.771	130	130	0	1.0752	0.96089	51.949	64	0	Median	0.77326	0.87111	61.809	34	0	Median	1.4501	1.1887	35.194	30	0	Median	83.8	82.3	91449000000	41232000000	50217000000	48509000000	24742000000
P38064	P38064	1	1	1	54S ribosomal protein L16, mitochondrial	MRPL16	>sp|P38064|RM16_YEAST 54S ribosomal protein L16, mitochondrial OS=Saccharomyces cerevisiae (strain ATCC 204508 / S288c) GN=MRPL16 PE=1 SV=1	1	1	1	1	1	1	1	1	1	1	5.6	5.6	5.6	26.518	232	232	0	0.78805	0.77187	25.753	2	0	Median	NaN	NaN	NaN	1	0	Median	NaN	NaN	NaN	1	0	Median	5.6	5.6	36813000	22325000	14488000	15705000	9022800
P38067	P38067	1	1	1	Succinate-semialdehyde dehydrogenase [NADP(+)]	UGA2	>sp|P38067|UGA2_YEAST Succinate-semialdehyde dehydrogenase [NADP(+)] OS=Saccharomyces cerevisiae (strain ATCC 204508 / S288c) GN=UGA2 PE=1 SV=2	1	1	1	1	0	1	0	1	0	1	2.2	2.2	2.2	54.189	497	497	0.0096931	NaN	NaN	NaN	1	0	Median	NaN	NaN	NaN	0	0	Median	NaN	NaN	NaN	1	0	Median	0	2.2	11018000	4206600	6811900	0	0
P38071	P38071	5	5	5	Enoyl-[acyl-carrier protein] reductase [NADPH, B-specific], mitochondrial	ETR1	>sp|P38071|ETR1_YEAST Enoyl-[acyl-carrier protein] reductase [NADPH, B-specific], mitochondrial OS=Saccharomyces cerevisiae (strain ATCC 204508 / S288c) GN=ETR1 PE=1 SV=3	1	5	5	5	5	2	5	2	5	2	13.9	13.9	13.9	42.066	380	380	0	0.99051	1.1337	24.546	7	0	Median	0.99051	1.1337	21.694	5	0	Median	1.0775	0.93892	36.596	2	0	Median	13.9	6.1	290390000	149690000	140700000	203550000	105260000
P38077	P38077	13	13	13	ATP synthase subunit gamma, mitochondrial	ATP3	>sp|P38077|ATPG_YEAST ATP synthase subunit gamma, mitochondrial OS=Saccharomyces cerevisiae (strain ATCC 204508 / S288c) GN=ATP3 PE=1 SV=1	1	13	13	13	12	11	12	11	12	11	41.2	41.2	41.2	34.35	311	311	0	0.98096	1.0506	70.298	19	0	Median	1.1012	1.282	62.016	9	0	Median	0.63829	0.5519	54.274	10	0	Median	38.3	38.9	4803300000	2617900000	2185300000	2399800000	1148400000
P38081	P38081	1	1	1	Uncharacterized glycosyl hydrolase YBR056W		>sp|P38081|YBQ6_YEAST Uncharacterized glycosyl hydrolase YBR056W OS=Saccharomyces cerevisiae (strain ATCC 204508 / S288c) GN=YBR056W PE=1 SV=1	1	1	1	1	1	0	1	0	1	0	1.6	1.6	1.6	57.821	501	501	0.0096774	NaN	NaN	NaN	1	0	Median	NaN	NaN	NaN	1	0	Median	NaN	NaN	NaN	0	0	Median	1.6	0	50850000	27420000	23430000	50850000	27420000
P38088-2;P38088	P38088-2;P38088	18;18	18;18	18;18	Glycine--tRNA ligase 1, mitochondrial	GRS1	>sp|P38088-2|SYG_YEAST Isoform Cytoplasmic of Glycine--tRNA ligase 1, mitochondrial OS=Saccharomyces cerevisiae (strain ATCC 204508 / S288c) GN=GRS1;>sp|P38088|SYG_YEAST Glycine--tRNA ligase 1, mitochondrial OS=Saccharomyces cerevisiae (strain ATCC 204508	2	18	18	18	13	16	13	16	13	16	31.3	31.3	31.3	75.338	667	667;690	0	1.111	1.1056	42.313	27	0	Median	0.97766	1.1067	44.453	12	0	Median	1.2563	0.99305	36.409	15	0	Median	23.2	27.3	6330400000	3412900000	2917500000	2918100000	1612000000
P38109	P38109	2	2	2	Putative serine carboxypeptidase YBR139W		>sp|P38109|YBY9_YEAST Putative serine carboxypeptidase YBR139W OS=Saccharomyces cerevisiae (strain ATCC 204508 / S288c) GN=YBR139W PE=1 SV=1	1	2	2	2	2	1	2	1	2	1	4.5	4.5	4.5	57.638	508	508	0.00088652	1.0369	0.97414	3.8308	2	0	Median	NaN	NaN	NaN	1	0	Median	NaN	NaN	NaN	1	0	Median	4.5	1.8	27551000	14423000	13128000	16777000	9585500
P38115	P38115	6	6	6	D-arabinose dehydrogenase [NAD(P)+] heavy chain	ARA1	>sp|P38115|ARA1_YEAST D-arabinose dehydrogenase [NAD(P)+] heavy chain OS=Saccharomyces cerevisiae (strain ATCC 204508 / S288c) GN=ARA1 PE=1 SV=1	1	6	6	6	4	5	4	5	4	5	23.8	23.8	23.8	38.883	344	344	0	1.0479	0.97032	17.459	10	0	Median	1.0009	1.1202	15.663	4	0	Median	1.0479	0.90124	10.302	6	0	Median	14.5	19.8	951890000	536010000	415880000	563690000	363210000
P38120	P38120	1	1	1	37S ribosomal protein S9, mitochondrial	MRPS9	>sp|P38120|RT09_YEAST 37S ribosomal protein S9, mitochondrial OS=Saccharomyces cerevisiae (strain ATCC 204508 / S288c) GN=MRPS9 PE=1 SV=1	1	1	1	1	1	1	1	1	1	1	3.6	3.6	3.6	31.925	278	278	0	0.94819	0.91651	18.639	2	0	Median	NaN	NaN	NaN	1	0	Median	NaN	NaN	NaN	1	0	Median	3.6	3.6	49245000	25955000	23290000	23624000	13692000
P38127	P38127	1	1	1	Mitochondrial carrier protein RIM2	RIM2	>sp|P38127|RIM2_YEAST Mitochondrial carrier protein RIM2 OS=Saccharomyces cerevisiae (strain ATCC 204508 / S288c) GN=RIM2 PE=3 SV=1	1	1	1	1	1	1	1	1	1	1	3.7	3.7	3.7	42.101	377	377	0	1.0271	1.0253	25.681	2	0	Median	NaN	NaN	NaN	1	0	Median	NaN	NaN	NaN	1	0	Median	3.7	3.7	57538000	31170000	26368000	28475000	14429000
P38130	P38130	1	1	1	Probable mannosyltransferase KTR3	KTR3	>sp|P38130|KTR3_YEAST Probable mannosyltransferase KTR3 OS=Saccharomyces cerevisiae (strain ATCC 204508 / S288c) GN=KTR3 PE=1 SV=1	1	1	1	1	1	1	1	1	1	1	2.2	2.2	2.2	47.482	404	404	0	0.94427	0.90385	17.829	2	0	Median	NaN	NaN	NaN	1	0	Median	NaN	NaN	NaN	1	0	Median	2.2	2.2	71685000	38374000	33311000	33586000	20997000
P38137	P38137	2	2	2	Peroxisomal-coenzyme A synthetase	PCS60	>sp|P38137|FAT2_YEAST Peroxisomal-coenzyme A synthetase OS=Saccharomyces cerevisiae (strain ATCC 204508 / S288c) GN=PCS60 PE=1 SV=1	1	2	2	2	1	1	1	1	1	1	4.1	4.1	4.1	60.488	543	543	0.0017271	1.4189	1.3877	8.1753	2	0	Median	NaN	NaN	NaN	1	0	Median	NaN	NaN	NaN	1	0	Median	2.6	1.5	183730000	80993000	102740000	29750000	13690000
P38144	P38144	1	1	1	ISWI chromatin-remodeling complex ATPase ISW1	ISW1	>sp|P38144|ISW1_YEAST ISWI chromatin-remodeling complex ATPase ISW1 OS=Saccharomyces cerevisiae (strain ATCC 204508 / S288c) GN=ISW1 PE=1 SV=2	1	1	1	1	1	0	1	0	1	0	1.2	1.2	1.2	131.1	1129	1129	0	NaN	NaN	NaN	1	0	Median	NaN	NaN	NaN	1	0	Median	NaN	NaN	NaN	0	0	Median	1.2	0	7133400	3160100	3973400	7133400	3160100
P38167	P38167	2	2	2	Protein ECM21	ECM21	>sp|P38167|ECM21_YEAST Protein ECM21 OS=Saccharomyces cerevisiae (strain ATCC 204508 / S288c) GN=ECM21 PE=1 SV=2	1	2	2	2	1	2	1	2	1	2	1.9	1.9	1.9	123.61	1117	1117	0	1.3422	1.1773	19.621	3	1	Median	NaN	NaN	NaN	1	0	Median	1.4367	1.2538	8.9084	2	1	Median	1.1	1.9	76232000	34128000	42104000	25925000	15582000
P38169	P38169	1	1	1	Kynurenine 3-monooxygenase	BNA4	>sp|P38169|KMO_YEAST Kynurenine 3-monooxygenase OS=Saccharomyces cerevisiae (strain ATCC 204508 / S288c) GN=BNA4 PE=1 SV=1	1	1	1	1	1	1	1	1	1	1	2.8	2.8	2.8	52.429	460	460	0	0.83479	0.78292	40.308	2	0	Median	NaN	NaN	NaN	1	0	Median	NaN	NaN	NaN	1	0	Median	2.8	2.8	25493000	13595000	11898000	11137000	7527300
P38174	P38174	6	6	6	Methionine aminopeptidase 2	MAP2	>sp|P38174|MAP2_YEAST Methionine aminopeptidase 2 OS=Saccharomyces cerevisiae (strain ATCC 204508 / S288c) GN=MAP2 PE=1 SV=4	1	6	6	6	3	6	3	6	3	6	15	15	15	47.518	421	421	0	0.77732	0.67397	78.691	9	0	Median	1.4983	1.6234	33.356	3	0	Median	0.48257	0.41762	41.037	6	0	Median	7.8	15	781720000	425230000	356490000	278770000	98294000
P38175	P38175	2	2	2	37S ribosomal protein MRP21, mitochondrial	MRP21	>sp|P38175|RT21_YEAST 37S ribosomal protein MRP21, mitochondrial OS=Saccharomyces cerevisiae (strain ATCC 204508 / S288c) GN=MRP21 PE=1 SV=1	1	2	2	2	2	1	2	1	2	1	12.4	12.4	12.4	20.394	177	177	0	1.0095	1.2204	18.499	3	0	Median	0.88991	1.0488	21.429	2	0	Median	NaN	NaN	NaN	1	0	Median	12.4	5.6	180180000	88935000	91245000	106940000	60290000
P38197	P38197	2	2	2	UPF0001 protein YBL036C		>sp|P38197|YBD6_YEAST UPF0001 protein YBL036C OS=Saccharomyces cerevisiae (strain ATCC 204508 / S288c) GN=YBL036C PE=1 SV=1	1	2	2	2	2	0	2	0	2	0	8.2	8.2	8.2	29.123	257	257	0	0.80579	0.89971	48.398	2	1	Median	0.80579	0.89971	48.398	2	1	Median	NaN	NaN	NaN	0	0	Median	8.2	0	52282000	27020000	25262000	52282000	27020000
P38205	P38205	7	7	7	Multisite-specific tRNA:(cytosine-C(5))-methyltransferase	NCL1	>sp|P38205|NCL1_YEAST Multisite-specific tRNA:(cytosine-C(5))-methyltransferase OS=Saccharomyces cerevisiae (strain ATCC 204508 / S288c) GN=NCL1 PE=1 SV=1	1	7	7	7	5	7	5	7	5	7	12	12	12	77.878	684	684	0	1.0034	0.88895	23.152	12	0	Median	1.0226	1.1637	19.559	5	0	Median	0.98464	0.85551	17.53	7	0	Median	9.4	12	857860000	405120000	452740000	411160000	190640000
P38219	P38219	11	11	11	Obg-like ATPase 1	OLA1	>sp|P38219|OLA1_YEAST Obg-like ATPase 1 OS=Saccharomyces cerevisiae (strain ATCC 204508 / S288c) GN=OLA1 PE=1 SV=1	1	11	11	11	11	11	11	11	11	11	35.3	35.3	35.3	44.174	394	394	0	1.1101	0.99422	41.243	25	0	Median	1.0337	1.1219	33.754	12	0	Median	1.1101	0.89031	32.912	13	0	Median	35.3	35.3	4504500000	2288600000	2215900000	2284100000	1135900000
P38230	P38230	4	4	4	Probable quinone oxidoreductase	ZTA1	>sp|P38230|QOR_YEAST Probable quinone oxidoreductase OS=Saccharomyces cerevisiae (strain ATCC 204508 / S288c) GN=ZTA1 PE=1 SV=1	1	4	4	4	4	3	4	3	4	3	11.7	11.7	11.7	37.018	334	334	0	0.98282	0.95757	22.602	5	0	Median	0.77924	0.95757	24.029	3	0	Median	1.4877	1.3046	24.234	3	1	Median	11.7	8.7	351910000	171510000	180400000	274530000	139380000
P38237	P38237	1	1	1	Ubiquitin carboxyl-terminal hydrolase 14	UBP14	>sp|P38237|UBP14_YEAST Ubiquitin carboxyl-terminal hydrolase 14 OS=Saccharomyces cerevisiae (strain ATCC 204508 / S288c) GN=UBP14 PE=1 SV=2	1	1	1	1	1	1	1	1	1	1	1.4	1.4	1.4	88.629	781	781	0.0097482	1.1299	1.1191	16.544	2	0	Median	NaN	NaN	NaN	1	0	Median	NaN	NaN	NaN	1	0	Median	1.4	1.4	43393000	19595000	23798000	21876000	10835000
P38248	P38248	2	2	2	Cell wall protein ECM33	ECM33	>sp|P38248|ECM33_YEAST Cell wall protein ECM33 OS=Saccharomyces cerevisiae (strain ATCC 204508 / S288c) GN=ECM33 PE=1 SV=3	1	2	2	2	2	2	2	2	2	2	5.8	5.8	5.8	43.768	429	429	0	1.1266	1.0739	22.236	4	0	Median	0.78863	0.89816	6.9546	2	0	Median	1.5734	1.2989	8.5924	2	0	Median	5.8	5.8	257060000	127150000	129900000	122770000	70522000
P38249	P38249	14	14	14	Eukaryotic translation initiation factor 3 subunit A	RPG1	>sp|P38249|EIF3A_YEAST Eukaryotic translation initiation factor 3 subunit A OS=Saccharomyces cerevisiae (strain ATCC 204508 / S288c) GN=RPG1 PE=1 SV=1	1	14	14	14	13	10	13	10	13	10	14.5	14.5	14.5	110.34	964	964	0	1.0152	1.1725	26.549	18	0	Median	1.0152	1.1874	22.798	10	0	Median	1.1624	0.94238	30.402	8	0	Median	14.5	11.4	1971200000	981700000	989530000	1078000000	547580000
P38250	P38250	2	2	2	Increased sodium tolerance protein 2	IST2	>sp|P38250|IST2_YEAST Increased sodium tolerance protein 2 OS=Saccharomyces cerevisiae (strain ATCC 204508 / S288c) GN=IST2 PE=1 SV=2	1	2	2	2	1	2	1	2	1	2	3.9	3.9	3.9	105.85	946	946	0	1.3873	1.137	9.4711	3	1	Median	NaN	NaN	NaN	1	0	Median	1.4138	1.2119	9.0186	2	1	Median	1.4	3.9	274250000	126840000	147410000	124910000	64048000
P38295	P38295	3	3	3	Medium-chain fatty acid ethyl ester synthase/esterase 2	EHT1	>sp|P38295|MCFS2_YEAST Medium-chain fatty acid ethyl ester synthase/esterase 2 OS=Saccharomyces cerevisiae (strain ATCC 204508 / S288c) GN=EHT1 PE=1 SV=1	1	3	3	3	2	3	2	3	2	3	9.3	9.3	9.3	51.255	451	451	0	1.2114	1.1076	31.968	5	0	Median	1.0913	1.2496	33.006	2	0	Median	1.2114	1.1076	31.167	3	0	Median	7.3	9.3	191130000	100990000	90146000	69254000	34625000
P38314	P38314	4	4	4	Protein SDS24	SDS24	>sp|P38314|SDS24_YEAST Protein SDS24 OS=Saccharomyces cerevisiae (strain ATCC 204508 / S288c) GN=SDS24 PE=1 SV=1	1	4	4	4	4	2	4	2	4	2	8.9	8.9	8.9	57.187	527	527	0	0.75607	0.773	26.033	6	0	Median	0.6822	0.773	30.865	4	0	Median	1.0624	0.90496	36.259	3	1	Median	8.9	4.6	181030000	96506000	84528000	117720000	67424000
P38323	P38323	2	2	2	Mitochondrial clpX-like chaperone MCX1	MCX1	>sp|P38323|MCX1_YEAST Mitochondrial clpX-like chaperone MCX1 OS=Saccharomyces cerevisiae (strain ATCC 204508 / S288c) GN=MCX1 PE=1 SV=1	1	2	2	2	2	0	2	0	2	0	3.8	3.8	3.8	57.945	520	520	0	1.438	1.6335	5.4255	2	0	Median	1.438	1.6335	5.4255	2	0	Median	NaN	NaN	NaN	0	0	Median	3.8	0	84106000	33991000	50115000	84106000	33991000
P38325	P38325	2	2	2	Mitochondrial outer membrane protein OM14	OM14	>sp|P38325|OM14_YEAST Mitochondrial outer membrane protein OM14 OS=Saccharomyces cerevisiae (strain ATCC 204508 / S288c) GN=OM14 PE=1 SV=1	1	2	2	2	2	2	2	2	2	2	11.9	11.9	11.9	14.609	134	134	0	1.1538	1.1402	26.448	4	0	Median	0.77783	0.89019	29.711	2	0	Median	1.4709	1.2506	7.7669	2	0	Median	11.9	11.9	295460000	139300000	156160000	145090000	78204000
P38333	P38333	2	2	2	Essential nuclear protein 1	ENP1	>sp|P38333|ENP1_YEAST Essential nuclear protein 1 OS=Saccharomyces cerevisiae (strain ATCC 204508 / S288c) GN=ENP1 PE=1 SV=1	1	2	2	2	2	1	2	1	2	1	3.3	3.3	3.3	55.136	483	483	0	1.1133	1.0931	4.6807	2	0	Median	NaN	NaN	NaN	1	0	Median	NaN	NaN	NaN	1	0	Median	3.3	1.7	244450000	117040000	127410000	126750000	63676000
P38341	P38341	5	5	5	Altered inheritance of mitochondria protein 5, mitochondrial	AIM5	>sp|P38341|AIM5_YEAST Altered inheritance of mitochondria protein 5, mitochondrial OS=Saccharomyces cerevisiae (strain ATCC 204508 / S288c) GN=AIM5 PE=1 SV=1	1	5	5	5	4	3	4	3	4	3	45.3	45.3	45.3	12.388	106	106	0	1.1966	1.0885	20.947	7	0	Median	0.98571	1.0734	26.137	4	0	Median	1.5717	1.3256	16.811	3	0	Median	37.7	30.2	554510000	252400000	302100000	277230000	139040000
P38426	P38426	4	3	3	Trehalose synthase complex regulatory subunit TPS3	TPS3	>sp|P38426|TPS3_YEAST Trehalose synthase complex regulatory subunit TPS3 OS=Saccharomyces cerevisiae (strain ATCC 204508 / S288c) GN=TPS3 PE=1 SV=3	1	4	3	3	4	2	3	2	3	2	6.1	4.4	4.4	118.83	1054	1054	0	1.2147	1.0343	6.2834	4	0	Median	0.8703	0.92223	18.811	3	2	Plateau	1.2673	1.0372	1.5082	3	0	Median	6.1	3.1	255170000	129050000	126120000	117220000	65819000
P38427	P38427	8	8	7	Trehalose synthase complex regulatory subunit TSL1	TSL1	>sp|P38427|TSL1_YEAST Trehalose synthase complex regulatory subunit TSL1 OS=Saccharomyces cerevisiae (strain ATCC 204508 / S288c) GN=TSL1 PE=1 SV=1	1	8	8	7	6	5	6	5	5	5	10.2	10.2	8.6	123.02	1098	1098	0	1.1972	1.0293	29.381	10	0	Median	1.1853	1.2747	29.399	5	0	Median	1.2093	1.0154	25.751	5	0	Median	8.5	6	781980000	345870000	436110000	192600000	91669000
P38428	P38428	2	2	2	Coupling of ubiquitin conjugation to ER degradation protein 1	CUE1	>sp|P38428|CUE1_YEAST Coupling of ubiquitin conjugation to ER degradation protein 1 OS=Saccharomyces cerevisiae (strain ATCC 204508 / S288c) GN=CUE1 PE=1 SV=2	1	2	2	2	2	2	2	2	2	2	9.4	9.4	9.4	22.762	203	203	0.00091659	0.74255	0.71052	44.016	4	0	Median	0.62254	0.71052	44.178	2	0	Median	0.9832	0.78983	61.225	2	0	Median	9.4	9.4	302080000	174820000	127260000	150200000	96568000
P38429	P38429	1	1	1	Transcriptional regulatory protein SAP30	SAP30	>sp|P38429|SAP30_YEAST Transcriptional regulatory protein SAP30 OS=Saccharomyces cerevisiae (strain ATCC 204508 / S288c) GN=SAP30 PE=1 SV=2	1	1	1	1	1	1	1	1	1	1	6.5	6.5	6.5	23.026	201	201	0	1.4057	1.3425	12.053	2	0	Median	NaN	NaN	NaN	1	0	Median	NaN	NaN	NaN	1	0	Median	6.5	6.5	19186000	8392600	10794000	11604000	5365400
P38431;P38431-2	P38431;P38431-2	7;6	7;6	7;6	Eukaryotic translation initiation factor 5	TIF5	>sp|P38431|IF5_YEAST Eukaryotic translation initiation factor 5 OS=Saccharomyces cerevisiae (strain ATCC 204508 / S288c) GN=TIF5 PE=1 SV=1;>sp|P38431-2|IF5_YEAST Isoform Short of Eukaryotic translation initiation factor 5 OS=Saccharomyces cerevisiae (strai	2	7	7	7	7	5	7	5	7	5	17	17	17	45.261	405	405;388	0	0.76873	0.88137	20.453	7	0	Median	0.69856	0.78589	16.227	4	0	Median	1.1985	1.054	10.578	3	0	Median	17	13.3	625190000	320130000	305060000	331580000	191010000
P38555;P51996	P38555;P51996	3;2	3;2	3;2	GTP-binding protein YPT31/YPT8;GTP-binding protein YPT32/YPT11	YPT31;YPT32	>sp|P38555|YPT31_YEAST GTP-binding protein YPT31/YPT8 OS=Saccharomyces cerevisiae (strain ATCC 204508 / S288c) GN=YPT31 PE=1 SV=3;>sp|P51996|YPT32_YEAST GTP-binding protein YPT32/YPT11 OS=Saccharomyces cerevisiae (strain ATCC 204508 / S288c) GN=YPT32 PE=1	2	3	3	3	2	2	2	2	2	2	13.9	13.9	13.9	24.469	223	223;222	0	0.9956	0.96847	14.442	4	0	Median	0.99237	1.1179	9.3451	2	0	Median	0.9956	0.88686	1.4987	2	0	Median	10.3	8.1	101630000	54068000	47563000	44798000	22423000
P38616	P38616	1	1	1	Protein YGP1	YGP1	>sp|P38616|YGP1_YEAST Protein YGP1 OS=Saccharomyces cerevisiae (strain ATCC 204508 / S288c) GN=YGP1 PE=1 SV=2	1	1	1	1	1	1	1	1	1	1	2.3	2.3	2.3	37.327	354	354	0.00089606	0.95772	0.96599	26.014	2	0	Median	NaN	NaN	NaN	1	0	Median	NaN	NaN	NaN	1	0	Median	2.3	2.3	67498000	33564000	33934000	25457000	15264000
P38620	P38620	1	1	1	Ribose-phosphate pyrophosphokinase 2	PRS2	>sp|P38620|KPR2_YEAST Ribose-phosphate pyrophosphokinase 2 OS=Saccharomyces cerevisiae (strain ATCC 204508 / S288c) GN=PRS2 PE=1 SV=1	1	1	1	1	1	1	1	1	1	1	3.1	3.1	3.1	34.765	318	318	0	1.1934	1.2126	18.776	2	0	Median	NaN	NaN	NaN	1	0	Median	NaN	NaN	NaN	1	0	Median	3.1	3.1	51701000	19543000	32158000	26597000	10865000
P38624	P38624	4	4	4	Proteasome subunit beta type-1	PRE3	>sp|P38624|PSB1_YEAST Proteasome subunit beta type-1 OS=Saccharomyces cerevisiae (strain ATCC 204508 / S288c) GN=PRE3 PE=1 SV=2	1	4	4	4	3	4	3	4	3	4	19.5	19.5	19.5	23.547	215	215	0	0.92602	0.893	11.756	5	0	Median	0.76135	0.87754	14.575	3	0	Median	1.0928	0.99454	7.7529	4	2	Linear	14.9	19.5	574620000	288800000	285820000	249570000	141250000
P38625	P38625	7	7	7	GMP synthase [glutamine-hydrolyzing]	GUA1	>sp|P38625|GUAA_YEAST GMP synthase [glutamine-hydrolyzing] OS=Saccharomyces cerevisiae (strain ATCC 204508 / S288c) GN=GUA1 PE=1 SV=4	1	7	7	7	6	3	6	3	6	3	14.3	14.3	14.3	58.482	525	525	0	0.93378	0.87271	43.621	10	0	Median	0.70736	0.79896	57.69	6	0	Median	1.226	0.96523	12.521	4	0	Median	12.4	6.7	809640000	475070000	334560000	501110000	333950000
P38626	P38626	3	3	3	NADH-cytochrome b5 reductase 1	CBR1	>sp|P38626|NCB5R_YEAST NADH-cytochrome b5 reductase 1 OS=Saccharomyces cerevisiae (strain ATCC 204508 / S288c) GN=CBR1 PE=1 SV=2	1	3	3	3	1	3	1	3	1	3	9.5	9.5	9.5	31.493	284	284	0	0.85966	0.93172	33.446	3	0	Median	NaN	NaN	NaN	1	0	Median	1.3531	1.1803	39.943	3	1	Median	2.8	9.5	97419000	54772000	42647000	13829000	7533700
P38627	P38627	1	1	1	CTP synthase 2	URA8	>sp|P38627|URA8_YEAST CTP synthase 2 OS=Saccharomyces cerevisiae (strain ATCC 204508 / S288c) GN=URA8 PE=1 SV=4	1	1	1	1	0	1	0	1	0	1	2.2	2.2	2.2	64.51	578	578	0.00091408	NaN	NaN	NaN	1	0	Median	NaN	NaN	NaN	0	0	Median	NaN	NaN	NaN	1	0	Median	0	2.2	43485000	24499000	18986000	0	0
P38687	P38687	4	4	4	Signal recognition particle subunit SRP68	SRP68	>sp|P38687|SRP68_YEAST Signal recognition particle subunit SRP68 OS=Saccharomyces cerevisiae (strain ATCC 204508 / S288c) GN=SRP68 PE=1 SV=1	1	4	4	4	2	3	2	3	2	3	7.2	7.2	7.2	69.005	599	599	0	1.1775	1.0065	29.561	5	0	Median	0.75561	0.84919	10.627	2	0	Median	1.6401	1.4783	23.263	3	0	Median	3.5	5.8	278120000	124160000	153970000	113720000	59969000
P38689	P38689	1	1	1	Ribose-phosphate pyrophosphokinase 3	PRS3	>sp|P38689|KPR3_YEAST Ribose-phosphate pyrophosphokinase 3 OS=Saccharomyces cerevisiae (strain ATCC 204508 / S288c) GN=PRS3 PE=1 SV=1	1	1	1	1	1	1	1	1	1	1	3.8	3.8	3.8	35.123	320	320	0	0.82169	0.77758	12.963	2	0	Median	NaN	NaN	NaN	1	0	Median	NaN	NaN	NaN	1	0	Median	3.8	3.8	84059000	40416000	43643000	41773000	19488000
P38694	P38694	3	3	3	Putative aldehyde dehydrogenase-like protein YHR039C	MSC7	>sp|P38694|MSC7_YEAST Putative aldehyde dehydrogenase-like protein YHR039C OS=Saccharomyces cerevisiae (strain ATCC 204508 / S288c) GN=MSC7 PE=1 SV=1	1	3	3	3	3	2	3	2	3	2	6.4	6.4	6.4	71.32	644	644	0	0.81891	0.94017	11.72	3	0	Median	0.81891	0.94017	95.083	3	1	Median	2.0263	1.8285	74.94	2	1	Median	6.4	4	184310000	68721000	115590000	115710000	47239000
P38695	P38695	2	2	2	Probable glucose transporter HXT5	HXT5	>sp|P38695|HXT5_YEAST Probable glucose transporter HXT5 OS=Saccharomyces cerevisiae (strain ATCC 204508 / S288c) GN=HXT5 PE=1 SV=1	1	2	2	2	2	2	2	2	2	2	3.2	3.2	3.2	66.251	592	592	0	1.7093	1.697	85.326	4	3	Median	1.9132	2.261	39.108	2	2	Median	0.97882	0.82426	100.65	2	1	Median	3.2	3.2	1347500000	339650000	1007900000	819100000	177510000
P38701	P38701	17	17	17	40S ribosomal protein S20	RPS20	>sp|P38701|RS20_YEAST 40S ribosomal protein S20 OS=Saccharomyces cerevisiae (strain ATCC 204508 / S288c) GN=RPS20 PE=1 SV=3	1	17	17	17	16	17	16	17	16	17	70.2	70.2	70.2	13.907	121	121	0	0.9386	0.92416	60.613	47	0	Median	1.108	1.2826	45.087	23	0	Median	0.72231	0.61962	38.056	24	0	Median	70.2	70.2	28937000000	14408000000	14530000000	15247000000	6848300000
P38705	P38705	2	2	2	Serine--tRNA ligase, mitochondrial	DIA4	>sp|P38705|SYSM_YEAST Serine--tRNA ligase, mitochondrial OS=Saccharomyces cerevisiae (strain ATCC 204508 / S288c) GN=DIA4 PE=1 SV=1	1	2	2	2	1	1	1	1	1	1	4.3	4.3	4.3	50.389	446	446	0	1.3811	1.387	52.244	2	2	Median	NaN	NaN	NaN	1	1	Median	NaN	NaN	NaN	1	1	Median	1.8	2.5	59353000	24708000	34646000	28900000	14045000
P38707	P38707	6	6	6	Asparagine--tRNA ligase, cytoplasmic	DED81	>sp|P38707|SYNC_YEAST Asparagine--tRNA ligase, cytoplasmic OS=Saccharomyces cerevisiae (strain ATCC 204508 / S288c) GN=DED81 PE=1 SV=1	1	6	6	6	5	6	5	6	5	6	14.3	14.3	14.3	62.206	554	554	0	1.0055	1.0964	35.602	11	0	Median	1.0055	1.1541	27.394	5	0	Median	0.93953	0.80007	30.656	6	0	Median	11.7	14.3	653850000	334770000	319090000	302640000	136480000
P38708	P38708	10	10	10	Putative proline--tRNA ligase YHR020W	YHR020W	>sp|P38708|YHI0_YEAST Putative proline--tRNA ligase YHR020W OS=Saccharomyces cerevisiae (strain ATCC 204508 / S288c) GN=YHR020W PE=1 SV=1	1	10	10	10	8	9	8	9	8	9	21.8	21.8	21.8	77.385	688	688	0	1.1568	1.0382	24.645	18	0	Median	0.79898	0.92522	28.125	9	0	Median	1.2646	1.0533	21.384	9	0	Median	17.4	18	1941800000	975770000	966080000	775070000	422530000
P38713	P38713	1	1	1	Oxysterol-binding protein homolog 3	OSH3	>sp|P38713|OSH3_YEAST Oxysterol-binding protein homolog 3 OS=Saccharomyces cerevisiae (strain ATCC 204508 / S288c) GN=OSH3 PE=1 SV=1	1	1	1	1	1	1	1	1	1	1	0.8	0.8	0.8	113.76	996	996	0.0017498	0.30824	0.25566	37.142	3	3	Median	NaN	NaN	NaN	1	1	Median	0.30269	0.23902	9.516	2	2	Median	0.8	0.8	240250000	169650000	70599000	114580000	79806000
P38715	P38715	4	4	4	NADPH-dependent aldose reductase GRE3	GRE3	>sp|P38715|GRE3_YEAST NADPH-dependent aldose reductase GRE3 OS=Saccharomyces cerevisiae (strain ATCC 204508 / S288c) GN=GRE3 PE=1 SV=1	1	4	4	4	2	4	2	4	2	4	12.5	12.5	12.5	37.118	327	327	0	1.1281	1.1001	29.566	4	0	Median	0.71205	0.84597	45.492	2	1	Median	1.2505	1.037	33.222	3	0	Median	7.6	12.5	415020000	215420000	199600000	95804000	53200000
P38720;P53319	P38720	17;3	17;3	17;3	6-phosphogluconate dehydrogenase, decarboxylating 1	GND1	>sp|P38720|6PGD1_YEAST 6-phosphogluconate dehydrogenase, decarboxylating 1 OS=Saccharomyces cerevisiae (strain ATCC 204508 / S288c) GN=GND1 PE=1 SV=1	2	17	17	17	15	16	15	16	15	16	36.6	36.6	36.6	53.543	489	489;492	0	0.88888	0.90645	35.671	22	0	Median	0.86572	0.98489	34.251	11	0	Median	0.89414	0.78821	33.214	11	0	Median	30.7	33.5	4004800000	1802800000	2202100000	1869400000	886440000
P38741	P38741	2	2	2	Meiotic activator RIM4	RIM4	>sp|P38741|RIM4_YEAST Meiotic activator RIM4 OS=Saccharomyces cerevisiae (strain ATCC 204508 / S288c) GN=RIM4 PE=1 SV=1	1	2	2	2	2	2	2	2	2	2	3.2	3.2	3.2	80.108	713	713	0	1.1381	1.1561	27.995	4	0	Median	1.1381	1.2945	7.4785	2	0	Median	1.0574	0.88548	29.205	2	0	Median	3.2	3.2	166270000	77822000	88452000	87184000	40131000
P38754;P36105	P38754;P36105	17;15	17;15	17;15	60S ribosomal protein L14-B;60S ribosomal protein L14-A	RPL14B;RPL14A	>sp|P38754|RL14B_YEAST 60S ribosomal protein L14-B OS=Saccharomyces cerevisiae (strain ATCC 204508 / S288c) GN=RPL14B PE=1 SV=1;>sp|P36105|RL14A_YEAST 60S ribosomal protein L14-A OS=Saccharomyces cerevisiae (strain ATCC 204508 / S288c) GN=RPL14A PE=1 SV=1	2	17	17	17	16	16	16	16	16	16	69.6	69.6	69.6	15.153	138	138;138	0	0.97247	0.96797	36.456	32	0	Median	0.67858	0.75715	26.812	15	0	Median	1.3423	1.1676	30.789	17	0	Median	69.6	55.8	28811000000	13765000000	15046000000	14918000000	9231300000
P38755	P38755	2	1	1	Oxysterol-binding protein homolog 7	OSH7	>sp|P38755|OSH7_YEAST Oxysterol-binding protein homolog 7 OS=Saccharomyces cerevisiae (strain ATCC 204508 / S288c) GN=OSH7 PE=1 SV=1	1	2	1	1	1	2	1	1	1	1	5.5	3	3	49.804	437	437	0	1.4026	1.3381	46.582	2	1	Median	NaN	NaN	NaN	1	0	Median	NaN	NaN	NaN	1	1	Median	3	5.5	82824000	34049000	48775000	36926000	13610000
P38756	P38756	1	1	1	Uncharacterized protein YHR003C	YHR003C	>sp|P38756|YHG3_YEAST Uncharacterized protein YHR003C OS=Saccharomyces cerevisiae (strain ATCC 204508 / S288c) GN=YHR003C PE=1 SV=1	1	1	1	1	1	0	1	0	1	0	1.9	1.9	1.9	48.883	429	429	0.0097009	NaN	NaN	NaN	1	0	Median	NaN	NaN	NaN	1	0	Median	NaN	NaN	NaN	0	0	Median	1.9	0	29218000	16056000	13162000	29218000	16056000
P38758	P38758	3	3	3	Putative oxidoreductase TDA3	TDA3	>sp|P38758|TDA3_YEAST Putative oxidoreductase TDA3 OS=Saccharomyces cerevisiae (strain ATCC 204508 / S288c) GN=TDA3 PE=1 SV=2	1	3	3	3	2	3	2	3	2	3	5.2	5.2	5.2	57.613	523	523	0	0.96494	1.1215	17.583	5	0	Median	0.89228	1.0496	9.3695	2	0	Median	1.3046	1.1282	23.771	3	0	Median	3.8	5.2	177010000	89827000	87186000	85061000	43782000
P38764	P38764	1	1	1	26S proteasome regulatory subunit RPN1	RPN1	>sp|P38764|RPN1_YEAST 26S proteasome regulatory subunit RPN1 OS=Saccharomyces cerevisiae (strain ATCC 204508 / S288c) GN=RPN1 PE=1 SV=3	1	1	1	1	1	1	1	1	1	1	1.5	1.5	1.5	109.49	993	993	0	1.1575	1.1209	21.251	2	0	Median	NaN	NaN	NaN	1	0	Median	NaN	NaN	NaN	1	0	Median	1.5	1.5	205440000	97160000	108280000	109280000	49522000
P38777	P38777	2	2	2	Family of serine hydrolases 1	FSH1	>sp|P38777|FSH1_YEAST Family of serine hydrolases 1 OS=Saccharomyces cerevisiae (strain ATCC 204508 / S288c) GN=FSH1 PE=1 SV=1	1	2	2	2	2	2	2	2	2	2	10.7	10.7	10.7	27.339	243	243	0	1.1109	1.0699	45.654	6	0	Median	0.94797	0.97654	31.499	3	0	Median	1.3018	1.1722	60.91	3	0	Median	10.7	10.7	159840000	81714000	78130000	73928000	38584000
P38783	P38783	2	2	2	Protein FYV4, mitochondrial	FYV4	>sp|P38783|FYV4_YEAST Protein FYV4, mitochondrial OS=Saccharomyces cerevisiae (strain ATCC 204508 / S288c) GN=FYV4 PE=1 SV=1	1	2	2	2	2	2	2	2	2	2	12.3	12.3	12.3	15.291	130	130	0	1.2219	1.1851	83.527	4	0	Median	1.5059	1.7431	78.7	2	0	Median	0.87908	0.75479	87.93	2	0	Median	12.3	12.3	309290000	144670000	164620000	161300000	79109000
P38787	P38787	1	1	1	2-dehydropantoate 2-reductase	PAN5	>sp|P38787|PANE_YEAST 2-dehydropantoate 2-reductase OS=Saccharomyces cerevisiae (strain ATCC 204508 / S288c) GN=PAN5 PE=1 SV=1	1	1	1	1	1	1	1	1	1	1	3.7	3.7	3.7	42.821	379	379	0	1.0772	1.0563	13.122	2	0	Median	NaN	NaN	NaN	1	0	Median	NaN	NaN	NaN	1	0	Median	3.7	3.7	116560000	54232000	62332000	55527000	29611000
P38788	P38788	15	15	15	Ribosome-associated complex subunit SSZ1	SSZ1	>sp|P38788|SSZ1_YEAST Ribosome-associated complex subunit SSZ1 OS=Saccharomyces cerevisiae (strain ATCC 204508 / S288c) GN=SSZ1 PE=1 SV=2	1	15	15	15	14	9	14	9	14	9	37.2	37.2	37.2	58.237	538	538	0	1.1591	1.1608	37.987	16	0	Median	0.95102	1.0819	45.954	11	0	Median	1.3325	1.2027	11.468	5	0	Median	35.9	20.3	1355100000	681270000	673810000	756190000	409710000
P38791	P38791	5	5	5	Deoxyhypusine synthase	DYS1	>sp|P38791|DHYS_YEAST Deoxyhypusine synthase OS=Saccharomyces cerevisiae (strain ATCC 204508 / S288c) GN=DYS1 PE=1 SV=1	1	5	5	5	4	3	4	3	4	3	16.8	16.8	16.8	42.892	387	387	0	1.0175	0.88761	32.453	5	0	Median	0.66141	0.72445	41.839	3	0	Median	1.0175	0.88761	23.192	3	1	Median	14.5	8.5	272190000	162960000	109230000	124740000	89360000
P38803	P38803	1	1	1	Pre-rRNA-processing protein IPI1	IPI1	>sp|P38803|IPI1_YEAST Pre-rRNA-processing protein IPI1 OS=Saccharomyces cerevisiae (strain ATCC 204508 / S288c) GN=IPI1 PE=1 SV=1	1	1	1	1	1	1	1	1	1	1	3	3	3	37.866	334	334	0.0058431	1.1354	1.0809	33.104	2	0	Median	NaN	NaN	NaN	1	0	Median	NaN	NaN	NaN	1	0	Median	3	3	160180000	77638000	82537000	81740000	42937000
P38809	P38809	7	7	7	Uncharacterized protein YHR097C	YHR097C	>sp|P38809|YHP7_YEAST Uncharacterized protein YHR097C OS=Saccharomyces cerevisiae (strain ATCC 204508 / S288c) GN=YHR097C PE=1 SV=1	1	7	7	7	6	6	6	6	6	6	24	24	24	40.662	366	366	0	1.1048	1.2127	28.38	11	0	Median	0.84908	0.95274	24.927	6	0	Median	1.4371	1.2551	20.547	5	0	Median	23.2	24	456980000	222120000	234860000	253880000	144090000
P38825	P38825	4	4	4	Protein TOM71	TOM71	>sp|P38825|TOM71_YEAST Protein TOM71 OS=Saccharomyces cerevisiae (strain ATCC 204508 / S288c) GN=TOM71 PE=1 SV=1	1	4	4	4	4	3	4	3	4	3	6.4	6.4	6.4	71.855	639	639	0	0.90135	0.96171	47.031	7	0	Median	0.98303	1.1124	29.254	4	0	Median	0.90135	0.74515	41.193	3	0	Median	6.4	5.3	613500000	313670000	299830000	302260000	144280000
P38828	P38828	1	1	1	Protein LSM12	LSM12	>sp|P38828|LSM12_YEAST Protein LSM12 OS=Saccharomyces cerevisiae (strain ATCC 204508 / S288c) GN=LSM12 PE=1 SV=1	1	1	1	1	1	1	1	1	1	1	5.9	5.9	5.9	21.313	187	187	0	NaN	NaN	NaN	0	0	Median	NaN	NaN	NaN	0	0	Median	NaN	NaN	NaN	0	0	Median	5.9	5.9	0	0	0	0	0
P38833	P38833	2	2	2	Uncharacterized protein YHR127W	YHR127W	>sp|P38833|YHS7_YEAST Uncharacterized protein YHR127W OS=Saccharomyces cerevisiae (strain ATCC 204508 / S288c) GN=YHR127W PE=1 SV=1	1	2	2	2	2	0	2	0	2	0	9.5	9.5	9.5	27.132	243	243	0	0.47965	0.54011	44.357	2	2	Median	0.47965	0.54011	44.357	2	2	Median	NaN	NaN	NaN	0	0	Median	9.5	0	76384000	54167000	22217000	76384000	54167000
P38840	P38840	3	3	3	Aromatic amino acid aminotransferase 2	ARO9	>sp|P38840|ARO9_YEAST Aromatic amino acid aminotransferase 2 OS=Saccharomyces cerevisiae (strain ATCC 204508 / S288c) GN=ARO9 PE=1 SV=3	1	3	3	3	2	2	2	2	2	2	8.4	8.4	8.4	58.527	513	513	0	1.2555	1.0555	10.025	3	1	Plateau	NaN	NaN	NaN	1	1	Median	1.25	1.0538	2.5374	2	0	Median	6.8	3.5	229920000	148390000	81526000	123070000	103700000
P38858	P38858	1	1	1	6-phosphogluconolactonase 3	SOL3	>sp|P38858|SOL3_YEAST 6-phosphogluconolactonase 3 OS=Saccharomyces cerevisiae (strain ATCC 204508 / S288c) GN=SOL3 PE=1 SV=2	1	1	1	1	1	1	1	1	1	1	6.4	6.4	6.4	27.784	249	249	0	1.079	1.0751	11.194	2	0	Median	NaN	NaN	NaN	1	0	Median	NaN	NaN	NaN	1	0	Median	6.4	6.4	209240000	102660000	106580000	104770000	54553000
P38875	P38875	1	1	1	GPI transamidase component GPI16	GPI16	>sp|P38875|GPI16_YEAST GPI transamidase component GPI16 OS=Saccharomyces cerevisiae (strain ATCC 204508 / S288c) GN=GPI16 PE=1 SV=2	1	1	1	1	1	0	1	0	1	0	3	3	3	68.771	610	610	0	NaN	NaN	NaN	1	0	Median	NaN	NaN	NaN	1	0	Median	NaN	NaN	NaN	0	0	Median	3	0	5632600	3479700	2152900	5632600	3479700
P38879	P38879	4	4	4	Nascent polypeptide-associated complex subunit alpha	EGD2	>sp|P38879|NACA_YEAST Nascent polypeptide-associated complex subunit alpha OS=Saccharomyces cerevisiae (strain ATCC 204508 / S288c) GN=EGD2 PE=1 SV=3	1	4	4	4	3	4	3	4	3	4	23.6	23.6	23.6	18.709	174	174	0	1.026	0.97693	12.295	4	0	Median	0.88317	0.99097	7.6912	3	1	Median	1.2942	1.0598	20.826	3	1	Plateau	13.8	23.6	498150000	238670000	259480000	191900000	101100000
P38882	P38882	1	1	1	U3 small nucleolar RNA-associated protein 9	UTP9	>sp|P38882|UTP9_YEAST U3 small nucleolar RNA-associated protein 9 OS=Saccharomyces cerevisiae (strain ATCC 204508 / S288c) GN=UTP9 PE=1 SV=1	1	1	1	1	0	1	0	1	0	1	1.2	1.2	1.2	65.271	575	575	0.0073831	NaN	NaN	NaN	1	0	Median	NaN	NaN	NaN	0	0	Median	NaN	NaN	NaN	1	0	Median	0	1.2	346450000	125950000	220500000	0	0
P38886	P38886	1	1	1	26S proteasome regulatory subunit RPN10	RPN10	>sp|P38886|RPN10_YEAST 26S proteasome regulatory subunit RPN10 OS=Saccharomyces cerevisiae (strain ATCC 204508 / S288c) GN=RPN10 PE=1 SV=3	1	1	1	1	1	1	1	1	1	1	4.1	4.1	4.1	29.747	268	268	0	0.91489	0.90646	39.134	2	1	Median	NaN	NaN	NaN	1	1	Median	NaN	NaN	NaN	1	0	Median	4.1	4.1	79487000	43084000	36403000	39524000	22062000
P38891	P38891	18	18	14	Branched-chain-amino-acid aminotransferase, mitochondrial	BAT1	>sp|P38891|BCA1_YEAST Branched-chain-amino-acid aminotransferase, mitochondrial OS=Saccharomyces cerevisiae (strain ATCC 204508 / S288c) GN=BAT1 PE=1 SV=1	1	18	18	14	15	14	15	14	12	11	41.7	41.7	34.1	43.596	393	393	0	1.1039	1.0085	26.878	26	0	Median	0.8227	0.95442	26.636	14	0	Median	1.325	1.1151	28.336	12	0	Median	41	37.2	8617800000	4112800000	4505000000	4176300000	2170700000
P38911	P38911	6	6	5	FK506-binding nuclear protein	FPR3	>sp|P38911|FKBP3_YEAST FK506-binding nuclear protein OS=Saccharomyces cerevisiae (strain ATCC 204508 / S288c) GN=FPR3 PE=1 SV=2	1	6	6	5	6	5	6	5	5	4	17.3	17.3	13.1	46.553	411	411	0	0.76527	0.8774	32.798	11	0	Median	0.7424	0.84787	33.496	7	0	Median	1.1622	0.92054	36.232	4	0	Median	17.3	17	1104700000	583330000	521360000	618050000	355460000
P38912	P38912	3	3	3	Eukaryotic translation initiation factor 1A	TIF11	>sp|P38912|IF1A_YEAST Eukaryotic translation initiation factor 1A OS=Saccharomyces cerevisiae (strain ATCC 204508 / S288c) GN=TIF11 PE=1 SV=1	1	3	3	3	2	3	2	3	2	3	22.9	22.9	22.9	17.435	153	153	0	1.1394	1.0898	21.802	6	0	Median	1.2712	1.4799	25.605	3	1	Plateau	1.1234	0.94518	20.971	4	0	Median	15.7	22.9	942340000	453640000	488700000	449400000	224060000
P38922	P38922	17	17	17	Protein HRB1	HRB1	>sp|P38922|HRB1_YEAST Protein HRB1 OS=Saccharomyces cerevisiae (strain ATCC 204508 / S288c) GN=HRB1 PE=1 SV=2	1	17	17	17	16	16	16	16	16	16	31.7	31.7	31.7	52.141	454	454	0	0.60341	0.49064	122.83	36	0	Median	2.9582	3.4309	28.531	17	0	Median	0.34839	0.29061	27.854	19	0	Median	28.9	31.7	4402100000	2138100000	2264000000	2161100000	556650000
P38929	P38929	2	2	2	Calcium-transporting ATPase 2	PMC1	>sp|P38929|ATC2_YEAST Calcium-transporting ATPase 2 OS=Saccharomyces cerevisiae (strain ATCC 204508 / S288c) GN=PMC1 PE=1 SV=1	1	2	2	2	2	1	2	1	2	1	1.8	1.8	1.8	130.86	1173	1173	0	0.89081	0.97223	14.846	3	2	Median	0.83262	0.90551	10.054	2	2	Median	NaN	NaN	NaN	1	0	Median	1.8	0.9	105130000	57485000	47647000	43765000	25521000
P38930	P38930	2	2	2	Casein kinase II subunit beta	CKB2	>sp|P38930|CSK2C_YEAST Casein kinase II subunit beta OS=Saccharomyces cerevisiae (strain ATCC 204508 / S288c) GN=CKB2 PE=1 SV=1	1	2	2	2	2	2	2	2	2	2	9.7	9.7	9.7	29.842	258	258	0	0.90002	0.86527	20.415	2	0	Median	NaN	NaN	NaN	1	0	Median	NaN	NaN	NaN	1	0	Median	9.7	9.7	47450000	24271000	23179000	24070000	13833000
P38934	P38934	15	15	15	Nuclear segregation protein BFR1	BFR1	>sp|P38934|BFR1_YEAST Nuclear segregation protein BFR1 OS=Saccharomyces cerevisiae (strain ATCC 204508 / S288c) GN=BFR1 PE=1 SV=1	1	15	15	15	14	12	14	12	14	12	30.9	30.9	30.9	54.639	470	470	0	1.5737	1.7124	94.323	28	0	Median	1.9872	2.1547	32.119	16	0	Median	0.51197	0.44046	36.102	12	0	Median	28.3	22.8	2603100000	1206100000	1397000000	1467800000	486800000
P38961	P38961	1	1	1	25S rRNA (adenine(645)-N(1))-methyltransferase	RRP8	>sp|P38961|RRP8_YEAST 25S rRNA (adenine(645)-N(1))-methyltransferase OS=Saccharomyces cerevisiae (strain ATCC 204508 / S288c) GN=RRP8 PE=1 SV=2	1	1	1	1	1	1	1	1	1	1	2.8	2.8	2.8	45.985	392	392	0.00090253	0.45381	0.45475	94.598	2	2	Median	NaN	NaN	NaN	1	1	Median	NaN	NaN	NaN	1	1	Median	2.8	2.8	16574000	10449000	6124800	7242100	5715800
P38962	P38962	1	1	1	Golgi apparatus membrane protein TVP23	TVP23	>sp|P38962|TVP23_YEAST Golgi apparatus membrane protein TVP23 OS=Saccharomyces cerevisiae (strain ATCC 204508 / S288c) GN=TVP23 PE=1 SV=1	1	1	1	1	1	1	1	1	1	1	5.5	5.5	5.5	23.148	199	199	0	1.0049	1.015	69.922	2	0	Median	NaN	NaN	NaN	1	0	Median	NaN	NaN	NaN	1	0	Median	5.5	5.5	64008000	31780000	32228000	31210000	19659000
P38968	P38968	7	7	7	Protein transport protein SEC31	SEC31	>sp|P38968|SEC31_YEAST Protein transport protein SEC31 OS=Saccharomyces cerevisiae (strain ATCC 204508 / S288c) GN=SEC31 PE=1 SV=3	1	7	7	7	5	6	5	6	5	6	6.8	6.8	6.8	138.72	1273	1273	0	1.1364	1.0071	22.04	13	0	Median	0.89952	1.0443	20.746	6	0	Median	1.229	1.0071	24.536	7	0	Median	5.1	5.7	432160000	211650000	220510000	136790000	69498000
P38972	P38972	16	16	16	Phosphoribosylformylglycinamidine synthase	ADE6	>sp|P38972|PUR4_YEAST Phosphoribosylformylglycinamidine synthase OS=Saccharomyces cerevisiae (strain ATCC 204508 / S288c) GN=ADE6 PE=1 SV=2	1	16	16	16	15	11	15	11	15	11	13.7	13.7	13.7	148.9	1358	1358	0	1.0064	1.0752	24.545	19	0	Median	0.94413	1.1286	17.592	11	0	Median	1.1457	0.97824	32.039	8	0	Median	12.6	8.7	1923600000	641260000	1282300000	935200000	382730000
P38985	P38985	2	2	2	Signal recognition particle subunit SRP14	SRP14	>sp|P38985|SRP14_YEAST Signal recognition particle subunit SRP14 OS=Saccharomyces cerevisiae (strain ATCC 204508 / S288c) GN=SRP14 PE=1 SV=1	1	2	2	2	1	2	1	2	1	2	13.7	13.7	13.7	16.43	146	146	0	1.172	1.0476	56.874	3	0	Median	NaN	NaN	NaN	1	0	Median	0.9143	0.80518	37.225	2	0	Median	6.8	13.7	57209000	28418000	28790000	27069000	10816000
P38986	P38986	2	2	2	L-asparaginase 1	ASP1	>sp|P38986|ASPG1_YEAST L-asparaginase 1 OS=Saccharomyces cerevisiae (strain ATCC 204508 / S288c) GN=ASP1 PE=1 SV=1	1	2	2	2	1	1	1	1	1	1	7.6	7.6	7.6	41.395	381	381	0	1.1131	1.132	50.993	2	1	Median	NaN	NaN	NaN	1	1	Median	NaN	NaN	NaN	1	0	Median	3.4	4.2	57710000	23820000	33890000	37996000	15618000
P38988	P38988	3	3	3	Mitochondrial GTP/GDP carrier protein 1	GGC1	>sp|P38988|GGC1_YEAST Mitochondrial GTP/GDP carrier protein 1 OS=Saccharomyces cerevisiae (strain ATCC 204508 / S288c) GN=GGC1 PE=1 SV=1	1	3	3	3	2	2	2	2	2	2	8.7	8.7	8.7	33.215	300	300	0	0.93361	1.0986	14.538	3	0	Median	0.83295	0.97313	18.02	2	0	Median	1.4419	1.2052	13.097	2	1	Median	5.7	6.3	173940000	86067000	87870000	115000000	63986000
P38998	P38998	2	2	2	Saccharopine dehydrogenase [NAD(+), L-lysine-forming]	LYS1	>sp|P38998|LYS1_YEAST Saccharopine dehydrogenase [NAD(+), L-lysine-forming] OS=Saccharomyces cerevisiae (strain ATCC 204508 / S288c) GN=LYS1 PE=1 SV=3	1	2	2	2	2	2	2	2	2	2	4.3	4.3	4.3	41.464	373	373	0.0066667	1.1331	0.91751	32.226	4	2	Median	0.9496	1.0795	52.736	2	1	Median	1.1331	0.91751	8.3776	2	1	Median	4.3	4.3	146710000	74569000	72138000	72608000	39426000
P38999	P38999	2	2	2	Saccharopine dehydrogenase [NADP(+), L-glutamate-forming]	LYS9	>sp|P38999|LYS9_YEAST Saccharopine dehydrogenase [NADP(+), L-glutamate-forming] OS=Saccharomyces cerevisiae (strain ATCC 204508 / S288c) GN=LYS9 PE=1 SV=1	1	2	2	2	2	1	2	1	2	1	3.6	3.6	3.6	48.917	446	446	0	0.92965	0.9374	22.528	2	0	Median	NaN	NaN	NaN	1	0	Median	NaN	NaN	NaN	1	0	Median	3.6	1.6	20698000	10838000	9860300	11305000	6127200
P39004	P39004	1	1	1	High-affinity hexose transporter HXT6	HXT7	>sp|P39004|HXT7_YEAST High-affinity hexose transporter HXT6 OS=Saccharomyces cerevisiae (strain ATCC 204508 / S288c) GN=HXT7 PE=1 SV=1	1	1	1	1	0	1	0	1	0	1	3.3	3.3	3.3	62.734	570	570	0	NaN	NaN	NaN	1	1	Median	NaN	NaN	NaN	0	0	Median	NaN	NaN	NaN	1	1	Median	0	3.3	42297000	28908000	13388000	0	0
P39007	P39007	1	1	1	Dolichyl-diphosphooligosaccharide--protein glycosyltransferase subunit STT3	STT3	>sp|P39007|STT3_YEAST Dolichyl-diphosphooligosaccharide--protein glycosyltransferase subunit STT3 OS=Saccharomyces cerevisiae (strain ATCC 204508 / S288c) GN=STT3 PE=1 SV=2	1	1	1	1	1	1	1	1	1	1	1.4	1.4	1.4	81.528	718	718	0	1.3484	1.3101	36.901	2	0	Median	NaN	NaN	NaN	1	0	Median	NaN	NaN	NaN	1	0	Median	1.4	1.4	103090000	48619000	54468000	50385000	21440000
P39015	P39015	22	22	22	Suppressor protein STM1	STM1	>sp|P39015|STM1_YEAST Suppressor protein STM1 OS=Saccharomyces cerevisiae (strain ATCC 204508 / S288c) GN=STM1 PE=1 SV=3	1	22	22	22	20	19	20	19	20	19	76.6	76.6	76.6	29.995	273	273	0	0.98361	1.0591	45.974	55	0	Median	0.6077	0.70108	30.011	29	0	Median	1.8229	1.5691	25.124	26	0	Median	76.2	64.1	28228000000	13571000000	14657000000	14742000000	8990600000
P39076	P39076	14	14	14	T-complex protein 1 subunit beta	CCT2	>sp|P39076|TCPB_YEAST T-complex protein 1 subunit beta OS=Saccharomyces cerevisiae (strain ATCC 204508 / S288c) GN=CCT2 PE=1 SV=1	1	14	14	14	11	13	11	13	11	13	31.9	31.9	31.9	57.203	527	527	0	0.82929	0.90897	22.951	16	0	Median	0.7635	0.8579	15.701	9	0	Median	1.2545	1.1352	29.422	7	0	Median	24.7	30.6	1626200000	849820000	776410000	822980000	461190000
P39077	P39077	8	8	8	T-complex protein 1 subunit gamma	CCT3	>sp|P39077|TCPG_YEAST T-complex protein 1 subunit gamma OS=Saccharomyces cerevisiae (strain ATCC 204508 / S288c) GN=CCT3 PE=1 SV=2	1	8	8	8	6	7	6	7	6	7	16.3	16.3	16.3	58.814	534	534	0	0.95522	0.88345	16.948	13	0	Median	0.85554	0.96429	16.338	6	0	Median	0.97319	0.84055	15.44	7	0	Median	11.4	14.4	756770000	429210000	327560000	386860000	233000000
P39078	P39078	4	4	4	T-complex protein 1 subunit delta	CCT4	>sp|P39078|TCPD_YEAST T-complex protein 1 subunit delta OS=Saccharomyces cerevisiae (strain ATCC 204508 / S288c) GN=CCT4 PE=1 SV=2	1	4	4	4	4	4	4	4	4	4	7.6	7.6	7.6	57.603	528	528	0	0.88415	0.9772	20.672	6	0	Median	0.78792	0.90915	14.219	3	0	Median	1.2746	1.0975	28.527	3	0	Median	7.6	7.6	591930000	309870000	282060000	314280000	181000000
P39079	P39079	1	1	1	T-complex protein 1 subunit zeta	CCT6	>sp|P39079|TCPZ_YEAST T-complex protein 1 subunit zeta OS=Saccharomyces cerevisiae (strain ATCC 204508 / S288c) GN=CCT6 PE=1 SV=1	1	1	1	1	1	1	1	1	1	1	2.2	2.2	2.2	59.923	546	546	0	NaN	NaN	NaN	0	0	Median	NaN	NaN	NaN	0	0	Median	NaN	NaN	NaN	0	0	Median	2.2	2.2	0	0	0	0	0
P39101	P39101	2	2	2	Protein CAJ1	CAJ1	>sp|P39101|CAJ1_YEAST Protein CAJ1 OS=Saccharomyces cerevisiae (strain ATCC 204508 / S288c) GN=CAJ1 PE=1 SV=1	1	2	2	2	1	2	1	2	1	2	6.1	6.1	6.1	44.854	391	391	0	1.3317	1.1622	13.89	3	0	Median	NaN	NaN	NaN	1	0	Median	1.3648	1.2182	6.666	2	0	Median	3.6	6.1	84103000	41127000	42976000	34285000	19237000
P39103	P39103	1	1	1	Cytochrome c oxidase assembly protein COX14	COX14	>sp|P39103|COX14_YEAST Cytochrome c oxidase assembly protein COX14 OS=Saccharomyces cerevisiae (strain ATCC 204508 / S288c) GN=COX14 PE=1 SV=1	1	1	1	1	1	0	1	0	1	0	25.7	25.7	25.7	7.9589	70	70	0	NaN	NaN	NaN	1	0	Median	NaN	NaN	NaN	1	0	Median	NaN	NaN	NaN	0	0	Median	25.7	0	42034000	24739000	17295000	42034000	24739000
P39516;P06367	P39516;P06367	13;12	13;12	13;12	40S ribosomal protein S14-B;40S ribosomal protein S14-A	RPS14B;RPS14A	>sp|P39516|RS14B_YEAST 40S ribosomal protein S14-B OS=Saccharomyces cerevisiae (strain ATCC 204508 / S288c) GN=RPS14B PE=1 SV=2;>sp|P06367|RS14A_YEAST 40S ribosomal protein S14-A OS=Saccharomyces cerevisiae (strain ATCC 204508 / S288c) GN=RPS14A PE=1 SV=5	2	13	13	13	13	13	13	13	13	13	76.8	76.8	76.8	14.65	138	138;137	0	0.97452	0.97611	42.564	37	0	Median	0.96892	1.0953	37.783	19	0	Median	1.0564	0.84855	36.546	18	0	Median	76.8	76.8	23872000000	11808000000	12063000000	12236000000	6197400000
P39517	P39517	3	3	3	ATP-dependent RNA helicase DHH1	DHH1	>sp|P39517|DHH1_YEAST ATP-dependent RNA helicase DHH1 OS=Saccharomyces cerevisiae (strain ATCC 204508 / S288c) GN=DHH1 PE=1 SV=1	1	3	3	3	3	2	3	2	3	2	6.3	6.3	6.3	57.543	506	506	0	1.2564	1.0713	24.562	3	0	Median	0.73272	0.84248	11.579	3	2	Median	1.3678	1.1889	14.724	2	0	Median	6.3	4.3	334110000	176240000	157870000	165470000	100010000
P39518	P39518	3	3	3	Long-chain-fatty-acid--CoA ligase 2	FAA2	>sp|P39518|LCF2_YEAST Long-chain-fatty-acid--CoA ligase 2 OS=Saccharomyces cerevisiae (strain ATCC 204508 / S288c) GN=FAA2 PE=1 SV=1	1	3	3	3	3	2	3	2	3	2	5.1	5.1	5.1	83.437	744	744	0	1.0032	1.0066	22.503	4	2	Median	0.92159	1.0356	20.706	2	1	Median	1.1285	0.91285	30.517	2	1	Median	5.1	3.9	137950000	67959000	69989000	45691000	24188000
P39522	P39522	10	10	10	Dihydroxy-acid dehydratase, mitochondrial	ILV3	>sp|P39522|ILV3_YEAST Dihydroxy-acid dehydratase, mitochondrial OS=Saccharomyces cerevisiae (strain ATCC 204508 / S288c) GN=ILV3 PE=1 SV=2	1	10	10	10	9	6	9	6	9	6	20.2	20.2	20.2	62.86	585	585	0	0.97598	1.0749	29.725	17	0	Median	0.966	1.1021	30.048	10	0	Median	1.0258	0.87489	27.648	7	0	Median	17.4	14	1537600000	794650000	742980000	799670000	424340000
P39525	P39525	2	2	2	3-oxoacyl-[acyl-carrier-protein] synthase homolog	CEM1	>sp|P39525|CEM1_YEAST 3-oxoacyl-[acyl-carrier-protein] synthase homolog OS=Saccharomyces cerevisiae (strain ATCC 204508 / S288c) GN=CEM1 PE=1 SV=1	1	2	2	2	2	2	2	2	2	2	6.1	6.1	6.1	47.555	442	442	0	1.1642	0.9227	27.517	5	3	Median	0.71974	0.7811	14.883	2	1	Median	1.2829	1.1117	23.037	3	2	Median	6.1	6.1	95928000	50077000	45851000	40073000	22291000
P39533	P39533	7	5	5	Probable aconitate hydratase 2	ACO2	>sp|P39533|ACON2_YEAST Homocitrate dehydratase, mitochondrial OS=Saccharomyces cerevisiae (strain ATCC 204508 / S288c) GN=ACO2 PE=1 SV=1	1	7	5	5	7	3	5	1	5	1	8.6	7.6	7.6	86.582	789	789	0	0.78627	0.87191	25.51	3	0	Median	0.78627	0.87191	25.51	3	0	Median	1.343	1.2068	33.421	2	2	Median	8.6	2.7	309460000	116290000	193170000	244730000	90678000
P39676	P39676	4	4	4	Flavohemoprotein	YHB1	>sp|P39676|FHP_YEAST Flavohemoprotein OS=Saccharomyces cerevisiae (strain ATCC 204508 / S288c) GN=YHB1 PE=1 SV=2	1	4	4	4	3	4	3	4	3	4	14.3	14.3	14.3	44.646	399	399	0	1.1936	1.2224	14.216	6	0	Median	0.90282	1.0197	79.457	5	3	Median	1.351	1.2224	14.817	4	0	Median	11.3	14.3	406300000	209390000	196910000	200570000	111580000
P39708	P39708	6	2	2	NADP-specific glutamate dehydrogenase 2	GDH3	>sp|P39708|DHE5_YEAST NADP-specific glutamate dehydrogenase 2 OS=Saccharomyces cerevisiae (strain ATCC 204508 / S288c) GN=GDH3 PE=1 SV=1	1	6	2	2	5	4	2	1	2	1	13.8	6.6	6.6	49.627	457	457	0	1.0933	1.0419	21.399	3	0	Median	0.90726	1.0721	30.172	2	0	Median	NaN	NaN	NaN	1	0	Median	13.1	12	251740000	138410000	113330000	206480000	117520000
P39714	P39714	3	3	3	Diacetyl reductase [(R)-acetoin forming]	BDH1	>sp|P39714|BDH1_YEAST (R,R)-butanediol dehydrogenase OS=Saccharomyces cerevisiae (strain ATCC 204508 / S288c) GN=BDH1 PE=1 SV=2	1	3	3	3	3	2	3	2	3	2	12.3	12.3	12.3	41.582	382	382	0	1.0039	0.98426	49.482	8	0	Median	1.0396	1.1624	52.618	4	0	Median	0.89713	0.7633	13.324	4	0	Median	12.3	6.3	1969500000	979990000	989460000	858490000	405990000
P39715	P39715	2	2	2	Shuttling pre-60S factor ECM1	ECM1	>sp|P39715|ECM1_YEAST Shuttling pre-60S factor ECM1 OS=Saccharomyces cerevisiae (strain ATCC 204508 / S288c) GN=ECM1 PE=1 SV=2	1	2	2	2	1	2	1	2	1	2	11.3	11.3	11.3	23.891	212	212	0.00090498	0.81367	0.82986	18.788	3	0	Median	NaN	NaN	NaN	1	0	Median	0.99555	0.84829	26.51	2	0	Median	5.7	11.3	442560000	226310000	216250000	206270000	122170000
P39721	P39721	1	1	1	Protein AIM2	AIM2	>sp|P39721|AIM2_YEAST Protein AIM2 OS=Saccharomyces cerevisiae (strain ATCC 204508 / S288c) GN=AIM2 PE=1 SV=1	1	1	1	1	1	1	1	1	1	1	3.7	3.7	3.7	27.089	246	246	0.0009058	0.92249	0.91038	12.946	2	0	Median	NaN	NaN	NaN	1	0	Median	NaN	NaN	NaN	1	0	Median	3.7	3.7	55517000	31815000	23701000	30313000	18032000
P39726	P39726	1	1	1	Glycine cleavage system H protein, mitochondrial	GCV3	>sp|P39726|GCSH_YEAST Glycine cleavage system H protein, mitochondrial OS=Saccharomyces cerevisiae (strain ATCC 204508 / S288c) GN=GCV3 PE=1 SV=3	1	1	1	1	1	1	1	1	1	1	4.7	4.7	4.7	18.793	170	170	0.0042735	NaN	NaN	NaN	1	0	Median	NaN	NaN	NaN	1	0	Median	NaN	NaN	NaN	0	0	Median	4.7	4.7	34034000	20236000	13797000	34034000	20236000
P39727	P39727	1	1	1	ER-derived vesicles protein ERV46	ERV46	>sp|P39727|ERV46_YEAST ER-derived vesicles protein ERV46 OS=Saccharomyces cerevisiae (strain ATCC 204508 / S288c) GN=ERV46 PE=1 SV=2	1	1	1	1	1	1	1	1	1	1	2.7	2.7	2.7	46.235	415	415	0	1.0407	1.0256	18.799	2	0	Median	NaN	NaN	NaN	1	0	Median	NaN	NaN	NaN	1	0	Median	2.7	2.7	30481000	16044000	14437000	14831000	9104400
P39730	P39730	12	12	12	Eukaryotic translation initiation factor 5B	FUN12	>sp|P39730|IF2P_YEAST Eukaryotic translation initiation factor 5B OS=Saccharomyces cerevisiae (strain ATCC 204508 / S288c) GN=FUN12 PE=1 SV=2	1	12	12	12	11	11	11	11	11	11	12.3	12.3	12.3	112.27	1002	1002	0	1.0342	0.90739	31.821	21	0	Median	0.77017	0.83936	37.518	11	0	Median	1.2958	1.0772	20.654	10	0	Median	9.6	11.3	1797500000	915990000	881480000	947890000	557490000
P39742	P39742	2	2	2	Translocation protein SEC72	SEC72	>sp|P39742|SEC72_YEAST Translocation protein SEC72 OS=Saccharomyces cerevisiae (strain ATCC 204508 / S288c) GN=SEC72 PE=1 SV=3	1	2	2	2	1	2	1	2	1	2	9.3	9.3	9.3	21.607	193	193	0	1.0133	1.021	168.61	3	1	Plateau	NaN	NaN	NaN	1	0	Median	0.28991	0.24995	214.09	2	1	Median	4.1	9.3	448470000	371570000	76905000	58577000	31877000
P39743	P39743	6	6	6	Reduced viability upon starvation protein 167	RVS167	>sp|P39743|RV167_YEAST Reduced viability upon starvation protein 167 OS=Saccharomyces cerevisiae (strain ATCC 204508 / S288c) GN=RVS167 PE=1 SV=1	1	6	6	6	5	5	5	5	5	5	15.6	15.6	15.6	52.774	482	482	0	1.1911	1.1068	47.472	8	0	Median	1.4058	1.5953	18.683	3	0	Median	0.89154	0.74111	42.968	5	0	Median	14.1	11.4	730550000	346290000	384260000	371940000	183480000
P39931	P39931	1	1	1	Protein SSP120	SSP120	>sp|P39931|SS120_YEAST Protein SSP120 OS=Saccharomyces cerevisiae (strain ATCC 204508 / S288c) GN=SSP120 PE=1 SV=1	1	1	1	1	1	1	1	1	1	1	5.1	5.1	5.1	27.289	234	234	0	0.98117	0.97513	12.483	2	0	Median	NaN	NaN	NaN	1	0	Median	NaN	NaN	NaN	1	0	Median	5.1	5.1	96557000	48560000	47998000	47112000	25193000
P39935	P39935	6	6	6	Eukaryotic initiation factor 4F subunit p150	TIF4631	>sp|P39935|IF4F1_YEAST Eukaryotic initiation factor 4F subunit p150 OS=Saccharomyces cerevisiae (strain ATCC 204508 / S288c) GN=TIF4631 PE=1 SV=2	1	6	6	6	3	5	3	5	3	5	7.4	7.4	7.4	107.1	952	952	0	1.0616	0.94355	27.546	7	0	Median	0.70092	0.76922	28.905	3	0	Median	1.3845	1.1207	24.292	4	0	Median	3.7	6.3	414910000	206700000	208210000	159040000	92226000
P39936	P39936	3	3	3	Eukaryotic initiation factor 4F subunit p130	TIF4632	>sp|P39936|IF4F2_YEAST Eukaryotic initiation factor 4F subunit p130 OS=Saccharomyces cerevisiae (strain ATCC 204508 / S288c) GN=TIF4632 PE=1 SV=1	1	3	3	3	3	1	3	1	3	1	3.4	3.4	3.4	103.9	914	914	0	1.0292	0.98971	23.777	5	0	Median	0.86942	1.0115	32.911	3	0	Median	1.1549	0.94519	6.5082	2	0	Median	3.4	1.1	453620000	245150000	208470000	338830000	189660000
P39938	P39938	14	14	5	40S ribosomal protein S26-A	RPS26A	>sp|P39938|RS26A_YEAST 40S ribosomal protein S26-A OS=Saccharomyces cerevisiae (strain ATCC 204508 / S288c) GN=RPS26A PE=1 SV=1	1	14	14	5	14	12	14	12	5	5	64.7	64.7	12.6	13.505	119	119	0	1.0359	0.98245	41.639	42	0	Median	0.78486	0.88569	44.674	22	0	Median	1.2936	1.0691	39.182	20	0	Median	64.7	61.3	60869000000	26474000000	34395000000	31704000000	16021000000
P39939	P39939	12	3	3	40S ribosomal protein S26-B	RPS26B	>sp|P39939|RS26B_YEAST 40S ribosomal protein S26-B OS=Saccharomyces cerevisiae (strain ATCC 204508 / S288c) GN=RPS26B PE=1 SV=1	1	12	3	3	11	10	2	3	2	3	64.7	12.6	12.6	13.447	119	119	0	1.0772	0.96581	21.241	9	0	Median	1.0284	1.1629	27.67	4	0	Median	1.1476	0.96547	16.972	5	0	Median	64.7	61.3	3035500000	1458400000	1577100000	1633300000	789950000
P39940	P39940	2	2	2	E3 ubiquitin-protein ligase RSP5	RSP5	>sp|P39940|RSP5_YEAST E3 ubiquitin-protein ligase RSP5 OS=Saccharomyces cerevisiae (strain ATCC 204508 / S288c) GN=RSP5 PE=1 SV=1	1	2	2	2	2	1	2	1	2	1	2.3	2.3	2.3	91.815	809	809	0	0.99563	1.1401	22.104	3	0	Median	0.84631	0.95873	24.501	2	0	Median	NaN	NaN	NaN	1	0	Median	2.3	1.1	281770000	140240000	141540000	148090000	80386000
P39954	P39954	16	16	16	Adenosylhomocysteinase	SAH1	>sp|P39954|SAHH_YEAST Adenosylhomocysteinase OS=Saccharomyces cerevisiae (strain ATCC 204508 / S288c) GN=SAH1 PE=1 SV=1	1	16	16	16	15	12	15	12	15	12	35.9	35.9	35.9	49.125	449	449	0	1.0461	1.1317	38.498	27	0	Median	1.2108	1.3701	26.44	15	0	Median	0.90753	0.76369	20.252	12	0	Median	35.9	30.7	8528000000	3578500000	4949500000	5125500000	2007200000
P39958	P39958	2	2	2	Rab GDP-dissociation inhibitor	GDI1	>sp|P39958|GDI1_YEAST Rab GDP-dissociation inhibitor OS=Saccharomyces cerevisiae (strain ATCC 204508 / S288c) GN=GDI1 PE=1 SV=1	1	2	2	2	2	0	2	0	2	0	6	6	6	51.206	451	451	0.00087873	0.53454	0.59221	57.149	2	2	Median	0.53454	0.59221	57.149	2	2	Median	NaN	NaN	NaN	0	0	Median	6	0	23004000	13611000	9393200	23004000	13611000
P39966	P39966	8	8	6	Protein phosphatase 2C homolog 2	PTC2	>sp|P39966|PP2C2_YEAST Protein phosphatase 2C homolog 2 OS=Saccharomyces cerevisiae (strain ATCC 204508 / S288c) GN=PTC2 PE=1 SV=1	1	8	8	6	5	8	5	8	4	6	20.3	20.3	15.9	50.388	464	464	0	1.2114	1.0246	30.712	10	0	Median	0.84935	0.97485	35.866	3	0	Median	1.2122	1.0338	30.631	7	0	Median	11.2	20.3	780230000	390800000	389440000	342970000	181780000
P39968	P39968	3	3	3	Vacuolar protein 8	VAC8	>sp|P39968|VAC8_YEAST Vacuolar protein 8 OS=Saccharomyces cerevisiae (strain ATCC 204508 / S288c) GN=VAC8 PE=1 SV=3	1	3	3	3	2	3	2	3	2	3	6.1	6.1	6.1	63.207	578	578	0	0.30226	0.28027	159.64	4	0	Median	0.18807	0.21691	203.39	2	0	Median	1.3641	1.1527	168.52	3	1	Median	4.3	6.1	346790000	262340000	84456000	205930000	175960000
P39976	P39976	5	5	5	D-lactate dehydrogenase [cytochrome] 3	DLD3	>sp|P39976|DLD3_YEAST D-lactate dehydrogenase [cytochrome] 3 OS=Saccharomyces cerevisiae (strain ATCC 204508 / S288c) GN=DLD3 PE=1 SV=1	1	5	5	5	5	5	5	5	5	5	13.7	13.7	13.7	55.224	496	496	0	1.0541	1.0065	38.852	8	0	Median	1.2385	1.3772	36.889	4	0	Median	0.93975	0.81371	24.848	4	0	Median	13.7	13.7	1385200000	506450000	878800000	830280000	254000000
P39986	P39986	7	7	7	Probable cation-transporting ATPase 1	SPF1	>sp|P39986|ATC6_YEAST Manganese-transporting ATPase 1 OS=Saccharomyces cerevisiae (strain ATCC 204508 / S288c) GN=SPF1 PE=1 SV=1	1	7	7	7	5	5	5	5	5	5	6.5	6.5	6.5	135.27	1215	1215	0	1.3537	1.0941	51.369	5	0	Median	1.3537	1.5591	60.835	3	0	Median	0.80347	0.68858	23.216	5	3	Median	4.9	4.3	658090000	344900000	313190000	206440000	114250000
P39998	P39998	2	2	2	Enhancer of mRNA-decapping protein 3	EDC3	>sp|P39998|EDC3_YEAST Enhancer of mRNA-decapping protein 3 OS=Saccharomyces cerevisiae (strain ATCC 204508 / S288c) GN=EDC3 PE=1 SV=1	1	2	2	2	0	2	0	2	0	2	3.6	3.6	3.6	61.339	551	551	0.0042517	1.231	1.074	25.427	2	1	Median	NaN	NaN	NaN	0	0	Median	1.231	1.074	25.427	2	1	Median	0	3.6	87603000	40546000	47057000	0	0
P40008	P40008	1	1	1	Protein FMP52, mitochondrial	FMP52	>sp|P40008|FMP52_YEAST Protein FMP52, mitochondrial OS=Saccharomyces cerevisiae (strain ATCC 204508 / S288c) GN=FMP52 PE=1 SV=1	1	1	1	1	0	1	0	1	0	1	7.8	7.8	7.8	25.086	231	231	0	NaN	NaN	NaN	0	0	Median	NaN	NaN	NaN	0	0	Median	NaN	NaN	NaN	0	0	Median	0	7.8	0	0	0	0	0
P40010	P40010	6	6	6	Nuclear GTP-binding protein NUG1	NUG1	>sp|P40010|NUG1_YEAST Nuclear GTP-binding protein NUG1 OS=Saccharomyces cerevisiae (strain ATCC 204508 / S288c) GN=NUG1 PE=1 SV=1	1	6	6	6	4	5	4	5	4	5	12.5	12.5	12.5	57.708	520	520	0	1.1636	0.99986	85.57	6	0	Median	0.68919	0.76918	61.675	6	5	Median	1.1796	1.0221	95.668	5	0	Median	8.1	9.4	1169800000	583660000	586150000	579360000	349850000
P40016	P40016	3	3	3	26S proteasome regulatory subunit RPN3	RPN3	>sp|P40016|RPN3_YEAST 26S proteasome regulatory subunit RPN3 OS=Saccharomyces cerevisiae (strain ATCC 204508 / S288c) GN=RPN3 PE=1 SV=5	1	3	3	3	1	3	1	3	1	3	6.9	6.9	6.9	60.392	523	523	0	1.0012	0.91306	22.347	4	0	Median	NaN	NaN	NaN	1	0	Median	0.99485	0.89809	15.036	3	0	Median	1.9	6.9	84271000	44848000	39423000	18053000	9395700
P40017	P40017	11	11	11	Carnitine O-acetyltransferase YAT2	YAT2	>sp|P40017|YAT2_YEAST Carnitine O-acetyltransferase YAT2 OS=Saccharomyces cerevisiae (strain ATCC 204508 / S288c) GN=YAT2 PE=1 SV=1	1	11	11	11	9	10	9	10	9	10	11.9	11.9	11.9	103.33	923	923	0	1.0453	0.97623	19.568	17	0	Median	0.92225	1.0522	18.779	8	0	Median	1.0516	0.87339	14.177	9	0	Median	8.3	11.9	1861200000	966500000	894730000	1019500000	543120000
P40024	P40024	11	11	11	ABC transporter ATP-binding protein ARB1	ARB1	>sp|P40024|ARB1_YEAST ABC transporter ATP-binding protein ARB1 OS=Saccharomyces cerevisiae (strain ATCC 204508 / S288c) GN=ARB1 PE=1 SV=1	1	11	11	11	10	5	10	5	10	5	21.5	21.5	21.5	68.376	610	610	0	0.91549	1.0235	23.108	13	0	Median	0.81006	0.92719	24.907	9	0	Median	1.3318	1.189	21.732	4	0	Median	19.5	9.7	638550000	316440000	322110000	369390000	190050000
P40029	P40029	1	1	1	Peptide methionine sulfoxide reductase	MXR1	>sp|P40029|MSRA_YEAST Peptide methionine sulfoxide reductase OS=Saccharomyces cerevisiae (strain ATCC 204508 / S288c) GN=MXR1 PE=1 SV=1	1	1	1	1	1	1	1	1	1	1	4.3	4.3	4.3	21.141	184	184	0.0017528	1.0354	0.99933	27.392	2	0	Median	NaN	NaN	NaN	1	0	Median	NaN	NaN	NaN	1	0	Median	4.3	4.3	98442000	47169000	51273000	46500000	25868000
P40030	P40030	2	2	2	Ergosterol biosynthetic protein 28	ERG28	>sp|P40030|ERG28_YEAST Ergosterol biosynthetic protein 28 OS=Saccharomyces cerevisiae (strain ATCC 204508 / S288c) GN=ERG28 PE=1 SV=1	1	2	2	2	2	2	2	2	2	2	15.5	15.5	15.5	17.135	148	148	0	1.2051	1.0716	41.197	5	0	Median	0.88086	0.97882	40.998	2	0	Median	1.2424	1.0716	48.666	3	0	Median	15.5	15.5	332810000	164130000	168680000	102810000	58147000
P40033	P40033	2	2	2	37S ribosomal protein RSM18, mitochondrial	RSM18	>sp|P40033|RSM18_YEAST 37S ribosomal protein RSM18, mitochondrial OS=Saccharomyces cerevisiae (strain ATCC 204508 / S288c) GN=RSM18 PE=1 SV=2	1	2	2	2	0	2	0	2	0	2	11.6	11.6	11.6	15.835	138	138	0.0074565	0.60348	0.47882	139.02	2	0	Median	NaN	NaN	NaN	0	0	Median	0.60348	0.47882	139.02	2	0	Median	0	11.6	103460000	56229000	47232000	0	0
P40035	P40035	2	2	2	Mitochondrial phosphate carrier protein 2	PIC2	>sp|P40035|PIC2_YEAST Mitochondrial phosphate carrier protein 2 OS=Saccharomyces cerevisiae (strain ATCC 204508 / S288c) GN=PIC2 PE=1 SV=1	1	2	2	2	1	2	1	2	1	2	7.7	7.7	7.7	33.528	300	300	0	0.75525	0.67309	52.752	3	0	Median	NaN	NaN	NaN	1	0	Median	0.64228	0.54464	29.946	2	0	Median	3.7	7.7	135470000	74152000	61322000	67764000	37505000
P40037	P40037	2	2	2	Protein HMF1	HMF1	>sp|P40037|HMF1_YEAST Protein HMF1 OS=Saccharomyces cerevisiae (strain ATCC 204508 / S288c) GN=HMF1 PE=1 SV=1	1	2	2	2	2	2	2	2	2	2	25.6	25.6	25.6	13.906	129	129	0	0.98545	0.99917	71.261	4	0	Median	1.3065	1.5353	44.748	2	0	Median	0.67039	0.5793	61.095	2	0	Median	25.6	25.6	162140000	77909000	84230000	98232000	39278000
P40040	P40040	4	4	4	Protein THO1	THO1	>sp|P40040|THO1_YEAST Protein THO1 OS=Saccharomyces cerevisiae (strain ATCC 204508 / S288c) GN=THO1 PE=1 SV=1	1	4	4	4	3	3	3	3	3	3	17.9	17.9	17.9	24.137	218	218	0	1.2459	1.2674	25.166	6	0	Median	1.0678	1.1521	23.476	3	0	Median	1.6673	1.3941	31.86	3	0	Median	13.3	11.9	235580000	103480000	132100000	92815000	44893000
P40043	P40043	2	2	1	Respiratory growth induced protein 1	RGI1	>sp|P40043|RGI1_YEAST Respiratory growth induced protein 1 OS=Saccharomyces cerevisiae (strain ATCC 204508 / S288c) GN=RGI1 PE=1 SV=1	1	2	2	1	1	2	1	2	1	1	12.4	12.4	8.1	18.989	161	161	0	1.0127	0.97045	54.7	2	0	Median	NaN	NaN	NaN	1	0	Median	NaN	NaN	NaN	1	0	Median	8.1	12.4	188620000	103100000	85526000	94448000	60220000
P40046	P40046	1	1	1	Vacuolar transporter chaperone 1	VTC1	>sp|P40046|VTC1_YEAST Vacuolar transporter chaperone 1 OS=Saccharomyces cerevisiae (strain ATCC 204508 / S288c) GN=VTC1 PE=1 SV=3	1	1	1	1	0	1	0	1	0	1	7.8	7.8	7.8	14.371	129	129	0.0042409	NaN	NaN	NaN	1	0	Median	NaN	NaN	NaN	0	0	Median	NaN	NaN	NaN	1	0	Median	0	7.8	110410000	52959000	57454000	0	0
P40047	P40047	9	9	9	Aldehyde dehydrogenase 5, mitochondrial	ALD5	>sp|P40047|ALDH5_YEAST Aldehyde dehydrogenase 5, mitochondrial OS=Saccharomyces cerevisiae (strain ATCC 204508 / S288c) GN=ALD5 PE=1 SV=4	1	9	9	9	7	8	7	8	7	8	16.7	16.7	16.7	56.692	520	520	0	0.9202	0.88835	26.687	14	0	Median	0.77926	0.87085	18.902	7	0	Median	1.146	0.99127	31.992	7	0	Median	12.1	15	1008900000	529790000	479150000	541020000	307750000
P40053	P40053	7	7	7	Altered inheritance of mitochondria protein 9, mitochondrial	AIM9	>sp|P40053|AIM9_YEAST Altered inheritance of mitochondria protein 9, mitochondrial OS=Saccharomyces cerevisiae (strain ATCC 204508 / S288c) GN=AIM9 PE=1 SV=1	1	7	7	7	7	6	7	6	7	6	11.8	11.8	11.8	72.413	627	627	0	1.0336	0.94479	47.101	11	0	Median	0.9062	1.053	41.76	6	0	Median	1.1905	0.94479	42.845	5	0	Median	11.8	9.4	857670000	431210000	426460000	398270000	199610000
P40054	P40054	8	8	7	D-3-phosphoglycerate dehydrogenase 1	SER3	>sp|P40054|SERA_YEAST D-3-phosphoglycerate dehydrogenase 1 OS=Saccharomyces cerevisiae (strain ATCC 204508 / S288c) GN=SER3 PE=1 SV=1	1	8	8	7	7	4	7	4	6	3	21.1	21.1	18.1	51.193	469	469	0	0.83552	0.91687	27.754	8	0	Median	0.81431	0.92567	26.429	5	0	Median	0.85728	0.75246	31.113	3	0	Median	18.8	10.9	500390000	268780000	231610000	309630000	167900000
P40066	P40066	1	1	1	Nucleoporin GLE2	GLE2	>sp|P40066|GLE2_YEAST Nucleoporin GLE2 OS=Saccharomyces cerevisiae (strain ATCC 204508 / S288c) GN=GLE2 PE=1 SV=1	1	1	1	1	0	1	0	1	0	1	3.3	3.3	3.3	40.522	365	365	0.00089206	NaN	NaN	NaN	1	0	Median	NaN	NaN	NaN	0	0	Median	NaN	NaN	NaN	1	0	Median	0	3.3	54622000	30007000	24615000	0	0
P40075	P40075	5	5	5	Vesicle-associated membrane protein-associated protein SCS2	SCS2	>sp|P40075|SCS2_YEAST Vesicle-associated membrane protein-associated protein SCS2 OS=Saccharomyces cerevisiae (strain ATCC 204508 / S288c) GN=SCS2 PE=1 SV=3	1	5	5	5	4	5	4	5	4	5	19.7	19.7	19.7	26.925	244	244	0	0.96826	0.98941	29.086	8	0	Median	0.69301	0.78232	28.415	4	0	Median	1.4614	1.2467	29.567	4	0	Median	16	19.7	362910000	185900000	177010000	181060000	104260000
P40086	P40086	2	2	2	Cytochrome c oxidase assembly protein COX15	COX15	>sp|P40086|COX15_YEAST Cytochrome c oxidase assembly protein COX15 OS=Saccharomyces cerevisiae (strain ATCC 204508 / S288c) GN=COX15 PE=1 SV=1	1	2	2	2	1	2	1	2	1	2	4.3	4.3	4.3	54.658	486	486	0	0.89452	0.77752	30.053	3	0	Median	NaN	NaN	NaN	1	0	Median	1.0628	0.93151	25.553	2	0	Median	1.9	4.3	146110000	70440000	75674000	41154000	23597000
P40093	P40093	3	3	3	UPF0160 protein YER156C	YER156C	>sp|P40093|YEY6_YEAST UPF0160 protein YER156C OS=Saccharomyces cerevisiae (strain ATCC 204508 / S288c) GN=YER156C PE=1 SV=1	1	3	3	3	3	2	3	2	3	2	9.8	9.8	9.8	38.174	338	338	0	1.1238	1.0602	51.322	5	3	Median	0.97302	1.0602	66.326	3	2	Median	1.1745	1.036	7.724	2	1	Median	9.8	6.8	130970000	61368000	69604000	74426000	35553000
P40096	P40096	2	2	2	Negative cofactor 2 complex subunit alpha	BUR6	>sp|P40096|NCB1_YEAST Negative cofactor 2 complex subunit alpha OS=Saccharomyces cerevisiae (strain ATCC 204508 / S288c) GN=BUR6 PE=1 SV=1	1	2	2	2	2	2	2	2	2	2	20.4	20.4	20.4	15.516	142	142	0	0.98118	1.01	26.006	3	0	Median	0.98118	1.01	76.214	3	2	Median	0.95078	0.8268	32.948	2	0	Median	20.4	20.4	144530000	73557000	70969000	82252000	38923000
P40098	P40098	4	4	4	Uncharacterized mitochondrial membrane protein FMP10	FMP10	>sp|P40098|FMP10_YEAST Uncharacterized mitochondrial membrane protein FMP10 OS=Saccharomyces cerevisiae (strain ATCC 204508 / S288c) GN=FMP10 PE=1 SV=1	1	4	4	4	4	2	4	2	4	2	19.7	19.7	19.7	27.698	244	244	0	0.81358	0.81865	20.203	4	0	Median	0.90041	1.0299	52.336	4	2	Median	0.79215	0.69646	17.449	2	0	Median	19.7	11.5	487360000	259300000	228060000	279130000	145850000
P40106	P40106	6	6	2	(DL)-glycerol-3-phosphatase 2	HOR2	>sp|P40106|GPP2_YEAST Glycerol-1-phosphate phosphohydrolase 2 OS=Saccharomyces cerevisiae (strain ATCC 204508 / S288c) GN=HOR2 PE=1 SV=1	1	6	6	2	4	5	4	5	1	2	24	24	7.2	27.813	250	250	0	1.3536	1.1157	37.422	8	0	Median	0.70138	0.81019	68.395	3	0	Median	1.3684	1.1602	10.155	5	0	Median	16.8	19.6	750330000	372460000	377870000	375570000	206390000
P40150	P40150	54	1	1	Heat shock protein SSB2	SSB2	>sp|P40150|HSP76_YEAST Heat shock protein SSB2 OS=Saccharomyces cerevisiae (strain ATCC 204508 / S288c) GN=SSB2 PE=1 SV=2	1	54	1	1	50	49	1	1	1	1	66.6	3.4	3.4	66.594	613	613	0	1.222	1.1946	7.4159	2	0	Median	NaN	NaN	NaN	1	0	Median	NaN	NaN	NaN	1	0	Median	64.1	65.7	216020000	97494000	118530000	107130000	50981000
P40168	P40168	1	1	1	Uncharacterized protein YNL195C		>sp|P40168|YNT5_YEAST Uncharacterized protein YNL195C OS=Saccharomyces cerevisiae (strain ATCC 204508 / S288c) GN=YNL195C PE=1 SV=2	1	1	1	1	1	1	1	1	1	1	3.8	3.8	3.8	28.321	261	261	0	0.47508	0.46604	30.662	2	2	Median	NaN	NaN	NaN	1	1	Median	NaN	NaN	NaN	1	1	Median	3.8	3.8	188290000	143960000	44329000	79021000	59503000
P40169	P40169	3	3	3	Uncharacterized plasma membrane protein YNL194C		>sp|P40169|YNT4_YEAST Uncharacterized plasma membrane protein YNL194C OS=Saccharomyces cerevisiae (strain ATCC 204508 / S288c) GN=YNL194C PE=1 SV=1	1	3	3	3	2	3	2	3	2	3	12	12	12	34.081	301	301	0	1.1764	1.1603	17.368	5	0	Median	0.94738	1.0675	27.307	2	0	Median	1.4411	1.1603	15.119	3	0	Median	9	12	1801700000	846290000	955400000	670360000	342420000
P40185	P40185	6	6	6	Protein MMF1, mitochondrial	MMF1	>sp|P40185|MMF1_YEAST Protein MMF1, mitochondrial OS=Saccharomyces cerevisiae (strain ATCC 204508 / S288c) GN=MMF1 PE=1 SV=1	1	6	6	6	6	4	6	4	6	4	69	69	69	15.908	145	145	0	0.92782	0.88339	34.144	4	0	Median	0.9564	1.0665	104.01	6	4	Median	1.243	0.98663	101.87	5	3	Median	69	42.1	3757100000	908920000	2848100000	1930400000	499240000
P40188	P40188	2	1	1	Respiratory growth induced protein 2	RGI2	>sp|P40188|RGI2_YEAST Respiratory growth induced protein 2 OS=Saccharomyces cerevisiae (strain ATCC 204508 / S288c) GN=RGI2 PE=1 SV=1	1	2	1	1	1	1	1	0	1	0	9.8	5.5	5.5	19.229	164	164	0.0042301	NaN	NaN	NaN	1	0	Median	NaN	NaN	NaN	1	0	Median	NaN	NaN	NaN	0	0	Median	5.5	4.3	51043000	29708000	21335000	51043000	29708000
P40208	P40208	1	1	1	Glucose-induced degradation protein 8	GID8	>sp|P40208|GID8_YEAST Glucose-induced degradation protein 8 OS=Saccharomyces cerevisiae (strain ATCC 204508 / S288c) GN=GID8 PE=1 SV=1	1	1	1	1	1	1	1	1	1	1	2.4	2.4	2.4	51.729	455	455	0	1.0925	1.0231	8.4617	2	0	Median	NaN	NaN	NaN	1	0	Median	NaN	NaN	NaN	1	0	Median	2.4	2.4	126810000	60882000	65926000	54894000	28374000
P40210	P40210	1	1	1	Protein SIP5	SIP5	>sp|P40210|SIP5_YEAST Protein SIP5 OS=Saccharomyces cerevisiae (strain ATCC 204508 / S288c) GN=SIP5 PE=1 SV=1	1	1	1	1	0	1	0	1	0	1	2.9	2.9	2.9	55.859	489	489	0.0017513	NaN	NaN	NaN	1	1	Median	NaN	NaN	NaN	0	0	Median	NaN	NaN	NaN	1	1	Median	0	2.9	15896000	4439100	11457000	0	0
P40212	P40212	23	23	1	60S ribosomal protein L13-B	RPL13B	>sp|P40212|RL13B_YEAST 60S ribosomal protein L13-B OS=Saccharomyces cerevisiae (strain ATCC 204508 / S288c) GN=RPL13B PE=1 SV=1	1	23	23	1	23	18	23	18	1	1	78.9	78.9	14.6	22.525	199	199	0	1.0145	0.94392	44.04	47	0	Median	0.86095	0.96783	50.501	24	0	Median	1.1702	0.94392	36.086	23	0	Median	78.9	68.3	119040000000	55475000000	63560000000	67818000000	38672000000
P40215;Q07500	P40215	6;1	6;1	6;1	External NADH-ubiquinone oxidoreductase 1, mitochondrial	NDE1	>sp|P40215|NDH1_YEAST External NADH-ubiquinone oxidoreductase 1, mitochondrial OS=Saccharomyces cerevisiae (strain ATCC 204508 / S288c) GN=NDE1 PE=1 SV=1	2	6	6	6	5	6	5	6	5	6	10.4	10.4	10.4	62.773	560	560;545	0	0.97522	0.98949	37.098	15	0	Median	0.99966	1.1076	16.003	8	0	Median	0.97522	0.85735	47.843	7	0	Median	8.8	10.4	1605400000	761700000	843690000	722150000	352200000
P40217	P40217	2	2	2	Eukaryotic translation initiation factor 3 subunit I	TIF34	>sp|P40217|EIF3I_YEAST Eukaryotic translation initiation factor 3 subunit I OS=Saccharomyces cerevisiae (strain ATCC 204508 / S288c) GN=TIF34 PE=1 SV=1	1	2	2	2	2	1	2	1	2	1	7.8	7.8	7.8	38.755	347	347	0	0.85847	0.76379	50.079	3	1	Median	1.034	1.1651	59.713	2	0	Median	NaN	NaN	NaN	1	1	Median	7.8	4.3	126200000	64935000	61263000	72431000	35826000
P40302	P40302	4	4	4	Proteasome subunit alpha type-6	PRE5	>sp|P40302|PSA6_YEAST Proteasome subunit alpha type-6 OS=Saccharomyces cerevisiae (strain ATCC 204508 / S288c) GN=PRE5 PE=1 SV=1	1	4	4	4	4	3	4	3	4	3	16.2	16.2	16.2	25.604	234	234	0	0.8765	0.99719	43.169	5	0	Median	0.8765	0.99762	39.319	3	0	Median	0.844	0.73753	85.012	3	1	Plateau	16.2	16.2	290450000	154330000	136120000	172180000	84784000
P40303	P40303	3	3	3	Proteasome subunit alpha type-4	PRE6	>sp|P40303|PSA4_YEAST Proteasome subunit alpha type-4 OS=Saccharomyces cerevisiae (strain ATCC 204508 / S288c) GN=PRE6 PE=1 SV=1	1	3	3	3	3	3	3	3	3	3	13.8	13.8	13.8	28.439	254	254	0	0.90291	0.97882	10.37	8	0	Median	0.8394	0.96568	1.5496	4	0	Median	1.2004	1.0627	15.699	4	0	Median	13.8	13.8	691240000	336350000	354890000	361750000	186250000
P40312	P40312	1	1	1	Cytochrome b5	CYB5	>sp|P40312|CYB5_YEAST Cytochrome b5 OS=Saccharomyces cerevisiae (strain ATCC 204508 / S288c) GN=CYB5 PE=1 SV=2	1	1	1	1	0	1	0	1	0	1	10.8	10.8	10.8	13.297	120	120	0	0.7186	0.61792	6.6899	2	0	Median	NaN	NaN	NaN	0	0	Median	0.7186	0.61792	6.6899	2	0	Median	0	10.8	132430000	84286000	48141000	0	0
P40314	P40314	1	1	1	Nascent polypeptide-associated complex subunit beta-2	BTT1	>sp|P40314|NACB2_YEAST Nascent polypeptide-associated complex subunit beta-2 OS=Saccharomyces cerevisiae (strain ATCC 204508 / S288c) GN=BTT1 PE=1 SV=1	1	1	1	1	1	1	1	1	1	1	6	6	6	16.62	149	149	0	NaN	NaN	NaN	0	0	Median	NaN	NaN	NaN	0	0	Median	NaN	NaN	NaN	0	0	Median	6	6	0	0	0	0	0
P40318	P40318	2	2	2	ERAD-associated E3 ubiquitin-protein ligase DOA10	SSM4	>sp|P40318|DOA10_YEAST ERAD-associated E3 ubiquitin-protein ligase DOA10 OS=Saccharomyces cerevisiae (strain ATCC 204508 / S288c) GN=SSM4 PE=1 SV=1	1	2	2	2	0	2	0	2	0	2	1.7	1.7	1.7	151.45	1319	1319	0.00090171	1.3808	1.1945	6.6796	2	0	Median	NaN	NaN	NaN	0	0	Median	1.3808	1.1945	6.6796	2	0	Median	0	1.7	32797000	14624000	18173000	0	0
P40327	P40327	7	7	7	26S protease regulatory subunit 4 homolog	RPT2	>sp|P40327|PRS4_YEAST 26S protease regulatory subunit 4 homolog OS=Saccharomyces cerevisiae (strain ATCC 204508 / S288c) GN=RPT2 PE=1 SV=3	1	7	7	7	6	6	6	6	6	6	15.3	15.3	15.3	48.828	437	437	0	0.95292	0.92984	21.29	11	0	Median	0.79789	0.91937	24.878	5	0	Median	1.1905	1.0205	19.873	6	0	Median	13.5	13.3	1021900000	510100000	511750000	571590000	313090000
P40335	P40335	2	2	2	Carboxypeptidase Y-deficient protein 8	PEP8	>sp|P40335|PEP8_YEAST Carboxypeptidase Y-deficient protein 8 OS=Saccharomyces cerevisiae (strain ATCC 204508 / S288c) GN=PEP8 PE=1 SV=2	1	2	2	2	1	2	1	2	1	2	6.6	6.6	6.6	42.546	379	379	0.00089686	0.061363	0.069539	162.86	3	2	Median	NaN	NaN	NaN	1	1	Median	0.18848	0.16003	220.04	2	1	Median	4.5	6.6	155590000	147170000	8429000	66070000	62901000
P40339	P40339	1	1	1	Replication factor C subunit 4	RFC4	>sp|P40339|RFC4_YEAST Replication factor C subunit 4 OS=Saccharomyces cerevisiae (strain ATCC 204508 / S288c) GN=RFC4 PE=1 SV=1	1	1	1	1	1	1	1	1	1	1	3.4	3.4	3.4	36.149	323	323	0	0.85714	0.85784	55.064	2	0	Median	NaN	NaN	NaN	1	0	Median	NaN	NaN	NaN	1	0	Median	3.4	3.4	25779000	17616000	8162600	16625000	13604000
P40341	P40341	5	5	3	Mitochondrial respiratory chain complexes assembly protein YTA12	YTA12	>sp|P40341|YTA12_YEAST Mitochondrial respiratory chain complexes assembly protein YTA12 OS=Saccharomyces cerevisiae (strain ATCC 204508 / S288c) GN=YTA12 PE=1 SV=2	1	5	5	3	3	4	3	4	1	3	5.1	5.1	3	93.275	825	825	0	1.3974	1.1445	26.401	5	0	Median	0.80456	0.90912	28.808	2	0	Median	1.436	1.193	16.335	3	0	Median	3	4.5	227750000	102090000	125660000	108510000	56665000
P40348	P40348	2	2	2	Replication factor C subunit 2	RFC2	>sp|P40348|RFC2_YEAST Replication factor C subunit 2 OS=Saccharomyces cerevisiae (strain ATCC 204508 / S288c) GN=RFC2 PE=1 SV=1	1	2	2	2	2	2	2	2	2	2	5.4	5.4	5.4	39.741	353	353	0	1.6532	1.4218	15.587	3	1	Plateau	NaN	NaN	NaN	1	0	Median	1.5196	1.3237	10.112	2	1	Median	5.4	5.4	155630000	65395000	90236000	21531000	12699000
P40350	P40350	1	1	1	Dolichyl-phosphate beta-glucosyltransferase	ALG5	>sp|P40350|ALG5_YEAST Dolichyl-phosphate beta-glucosyltransferase OS=Saccharomyces cerevisiae (strain ATCC 204508 / S288c) GN=ALG5 PE=1 SV=1	1	1	1	1	0	1	0	1	0	1	3.6	3.6	3.6	38.346	334	334	1	NaN	NaN	NaN	1	0	Median	NaN	NaN	NaN	0	0	Median	NaN	NaN	NaN	1	0	Median	0	3.6	130490000	58738000	71757000	0	0
P40364	P40364	5	5	5	Mitochondrial peculiar membrane protein 1	MPM1	>sp|P40364|MPM1_YEAST Mitochondrial peculiar membrane protein 1 OS=Saccharomyces cerevisiae (strain ATCC 204508 / S288c) GN=MPM1 PE=1 SV=1	1	5	5	5	5	4	5	4	5	4	25.8	25.8	25.8	28.47	252	252	0	1.0896	1.2186	48.238	8	0	Median	1.2534	1.4401	16.511	5	0	Median	0.70012	0.60399	19.775	3	0	Median	25.8	18.3	476680000	253020000	223660000	243220000	121360000
P40413	P40413	9	9	9	T-complex protein 1 subunit epsilon	CCT5	>sp|P40413|TCPE_YEAST T-complex protein 1 subunit epsilon OS=Saccharomyces cerevisiae (strain ATCC 204508 / S288c) GN=CCT5 PE=1 SV=3	1	9	9	9	7	6	7	6	7	6	11.6	11.6	11.6	61.913	562	562	0	1.0871	1.1175	37.688	13	0	Median	1.0871	1.2334	31.16	7	0	Median	1.0572	0.88768	34.293	6	0	Median	9.6	9.8	841940000	408400000	433540000	433090000	205510000
P40422	P40422	6	6	6	DNA-directed RNA polymerases I, II, and III subunit RPABC4	RPC10	>sp|P40422|RPAB4_YEAST DNA-directed RNA polymerases I, II, and III subunit RPABC4 OS=Saccharomyces cerevisiae (strain ATCC 204508 / S288c) GN=RPC10 PE=1 SV=1	1	6	6	6	6	5	6	5	6	5	62.9	62.9	62.9	7.7159	70	70	0	1.0238	0.94898	54.718	13	0	Median	1.1275	1.3326	30.257	7	0	Median	0.96585	0.77947	42.027	6	0	Median	62.9	61.4	12985000000	6471500000	6513500000	6282900000	3151000000
P40462	P40462	2	2	2	Protein TMA108	TMA108	>sp|P40462|TM108_YEAST Protein TMA108 OS=Saccharomyces cerevisiae (strain ATCC 204508 / S288c) GN=TMA108 PE=1 SV=1	1	2	2	2	1	2	1	2	1	2	4	4	4	107.72	946	946	0	NaN	NaN	NaN	1	0	Median	NaN	NaN	NaN	0	0	Median	NaN	NaN	NaN	1	0	Median	2	4	15852000	8026800	7825000	0	0
P40471	P40471	2	2	2	NADPH-dependent 1-acyldihydroxyacetone phosphate reductase	AYR1	>sp|P40471|AYR1_YEAST NADPH-dependent 1-acyldihydroxyacetone phosphate reductase OS=Saccharomyces cerevisiae (strain ATCC 204508 / S288c) GN=AYR1 PE=1 SV=1	1	2	2	2	1	2	1	2	1	2	13.8	13.8	13.8	32.814	297	297	0	0.98962	0.81943	39.404	3	0	Median	NaN	NaN	NaN	1	0	Median	0.79061	0.64425	34.015	2	0	Median	3.4	13.8	168620000	85275000	83341000	84148000	40437000
P40482	P40482	4	4	4	Protein transport protein SEC24	SEC24	>sp|P40482|SEC24_YEAST Protein transport protein SEC24 OS=Saccharomyces cerevisiae (strain ATCC 204508 / S288c) GN=SEC24 PE=1 SV=1	1	4	4	4	3	4	3	4	3	4	5.3	5.3	5.3	103.63	926	926	0	0.98549	1.0125	27.227	8	0	Median	0.84314	0.95547	18.014	4	0	Median	1.2393	1.0443	37.306	4	0	Median	4.4	5.3	423570000	197870000	225690000	161900000	83828000
P40491	P40491	1	1	1	ATP synthase assembly factor FMC1, mitochondrial	FMC1	>sp|P40491|FMC1_YEAST ATP synthase assembly factor FMC1, mitochondrial OS=Saccharomyces cerevisiae (strain ATCC 204508 / S288c) GN=FMC1 PE=1 SV=1	1	1	1	1	1	1	1	1	1	1	6.5	6.5	6.5	18.364	155	155	0.00090662	0.52444	0.53789	33.429	2	2	Median	NaN	NaN	NaN	1	1	Median	NaN	NaN	NaN	1	1	Median	6.5	6.5	118690000	77700000	40988000	61314000	47857000
P40495	P40495	4	4	4	Homoisocitrate dehydrogenase, mitochondrial	LYS12	>sp|P40495|LYS12_YEAST Homoisocitrate dehydrogenase, mitochondrial OS=Saccharomyces cerevisiae (strain ATCC 204508 / S288c) GN=LYS12 PE=1 SV=1	1	4	4	4	2	4	2	4	2	4	10.2	10.2	10.2	40.068	371	371	0	1.0592	1.1575	26.407	7	0	Median	1.1089	1.1597	22.213	3	0	Median	1.0122	0.90225	18.379	4	0	Median	4.9	10.2	308430000	148060000	160370000	101710000	49168000
P40496	P40496	2	2	2	37S ribosomal protein S25, mitochondrial	RSM25	>sp|P40496|RT25_YEAST 37S ribosomal protein S25, mitochondrial OS=Saccharomyces cerevisiae (strain ATCC 204508 / S288c) GN=RSM25 PE=1 SV=1	1	2	2	2	1	2	1	2	1	2	9.1	9.1	9.1	30.513	264	264	0.00090909	0.97836	0.8939	15.972	3	0	Median	NaN	NaN	NaN	1	0	Median	0.98375	0.85772	5.8439	2	0	Median	4.9	9.1	180360000	86709000	93650000	56522000	27985000
P40509	P40509	10	10	10	Coatomer subunit epsilon	SEC28	>sp|P40509|COPE_YEAST Coatomer subunit epsilon OS=Saccharomyces cerevisiae (strain ATCC 204508 / S288c) GN=SEC28 PE=1 SV=2	1	10	10	10	9	10	9	10	9	10	23.6	23.6	23.6	33.829	296	296	0	1.0184	1.1105	38.769	14	0	Median	1.0499	1.182	26.868	7	0	Median	0.9095	0.76034	34.894	7	0	Median	23.6	23.6	24329000000	11594000000	12735000000	9248000000	4381100000
P40510	P40510	5	4	4	D-3-phosphoglycerate dehydrogenase 2	SER33	>sp|P40510|SER33_YEAST D-3-phosphoglycerate dehydrogenase 2 OS=Saccharomyces cerevisiae (strain ATCC 204508 / S288c) GN=SER33 PE=1 SV=1	1	5	4	4	4	3	3	2	3	2	10.2	7.2	7.2	51.188	469	469	0	1.0468	1.1053	12.401	3	0	Median	0.92985	1.0164	11.867	2	0	Median	NaN	NaN	NaN	1	0	Median	10.2	7	83080000	38018000	45062000	51037000	25710000
P40513	P40513	3	3	3	Mitochondrial acidic protein MAM33	MAM33	>sp|P40513|MAM33_YEAST Mitochondrial acidic protein MAM33 OS=Saccharomyces cerevisiae (strain ATCC 204508 / S288c) GN=MAM33 PE=1 SV=1	1	3	3	3	2	3	2	3	2	3	10.2	10.2	10.2	30.132	266	266	0	1.0179	0.95892	59.875	5	3	Median	0.93585	1.0849	17.451	2	1	Median	1.0179	0.87006	79.619	3	2	Median	9.8	10.2	941490000	466110000	475370000	428680000	226180000
P40515	P40515	3	3	3	Mitochondria fission 1 protein	FIS1	>sp|P40515|FIS1_YEAST Mitochondria fission 1 protein OS=Saccharomyces cerevisiae (strain ATCC 204508 / S288c) GN=FIS1 PE=1 SV=1	1	3	3	3	0	3	0	3	0	3	25.8	25.8	25.8	17.733	155	155	0	1.4203	1.1675	20.187	3	0	Median	NaN	NaN	NaN	0	0	Median	1.4203	1.1675	20.187	3	0	Median	0	25.8	38013000	16256000	21757000	0	0
P87262;P40525	P87262;P40525	15;15	15;15	15;15	60S ribosomal protein L34-A;60S ribosomal protein L34-B	RPL34A;RPL34B	>sp|P87262|RL34A_YEAST 60S ribosomal protein L34-A OS=Saccharomyces cerevisiae (strain ATCC 204508 / S288c) GN=RPL34A PE=1 SV=1;>sp|P40525|RL34B_YEAST 60S ribosomal protein L34-B OS=Saccharomyces cerevisiae (strain ATCC 204508 / S288c) GN=RPL34B PE=1 SV=1	2	15	15	15	14	15	14	15	14	15	67.8	67.8	67.8	13.639	121	121;121	0	0.84666	0.89293	42.946	26	0	Median	0.4952	0.57133	29.735	13	0	Median	1.378	1.1886	23.278	13	0	Median	67.8	67.8	30673000000	14717000000	15956000000	17594000000	9888800000
P40531	P40531	10	10	10	Protein GVP36	GVP36	>sp|P40531|GVP36_YEAST Protein GVP36 OS=Saccharomyces cerevisiae (strain ATCC 204508 / S288c) GN=GVP36 PE=1 SV=1	1	10	10	10	7	9	7	9	7	9	32.8	32.8	32.8	36.67	326	326	0	1.0967	0.99542	30.074	14	0	Median	0.97584	1.0962	25.813	5	0	Median	1.2445	0.98139	30.234	9	0	Median	25.5	29.4	2080500000	1011100000	1069400000	849480000	442020000
P40557	P40557	1	1	1	ER-retained PMA1-suppressing protein 1	EPS1	>sp|P40557|EPS1_YEAST ER-retained PMA1-suppressing protein 1 OS=Saccharomyces cerevisiae (strain ATCC 204508 / S288c) GN=EPS1 PE=1 SV=1	1	1	1	1	1	1	1	1	1	1	1.1	1.1	1.1	81.218	701	701	0.0042699	NaN	NaN	NaN	1	0	Median	NaN	NaN	NaN	0	0	Median	NaN	NaN	NaN	1	0	Median	1.1	1.1	27079000	10318000	16761000	0	0
P40561	P40561	4	4	4	RNA-binding protein SGN1	SGN1	>sp|P40561|SGN1_YEAST RNA-binding protein SGN1 OS=Saccharomyces cerevisiae (strain ATCC 204508 / S288c) GN=SGN1 PE=1 SV=1	1	4	4	4	4	3	4	3	4	3	20.4	20.4	20.4	28.954	250	250	0	0.73889	0.84296	38.819	6	0	Median	0.66398	0.75604	11.372	4	0	Median	1.8291	1.4807	14.983	3	1	Median	20.4	14.4	415680000	209410000	206270000	241090000	145010000
P40580	P40580	4	4	4	Benzil reductase ((S)-benzoin forming) IRC24	IRC24	>sp|P40580|BZRD_YEAST Benzil reductase ((S)-benzoin forming) IRC24 OS=Saccharomyces cerevisiae (strain ATCC 204508 / S288c) GN=IRC24 PE=1 SV=1	1	4	4	4	4	4	4	4	4	4	17.1	17.1	17.1	28.804	263	263	0	1.3255	1.041	26.68	5	0	Median	0.77726	0.90265	36.617	3	0	Median	1.3651	1.1306	20.268	4	2	Median	17.1	17.1	367570000	174620000	192950000	177560000	94231000
P40581;P38143	P40581	4;1	4;1	4;1	Peroxiredoxin HYR1	HYR1	>sp|P40581|GPX3_YEAST Peroxiredoxin HYR1 OS=Saccharomyces cerevisiae (strain ATCC 204508 / S288c) GN=HYR1 PE=1 SV=1	2	4	4	4	4	3	4	3	4	3	19	19	19	18.641	163	163;162	0	0.91051	1.042	44.565	5	0	Median	0.91051	1.042	36.582	3	0	Median	1.2924	1.1806	45.486	4	2	Median	19	17.2	271000000	132910000	138090000	132110000	65896000
P40582	P40582	3	3	3	Glutathione S-transferase 1	GTT1	>sp|P40582|GST1_YEAST Glutathione S-transferase 1 OS=Saccharomyces cerevisiae (strain ATCC 204508 / S288c) GN=GTT1 PE=1 SV=1	1	3	3	3	2	3	2	3	2	3	11.1	11.1	11.1	26.794	234	234	0	1.3547	1.2209	30.824	5	4	Median	1.3446	1.5469	33.479	2	2	Median	1.3547	1.2026	26.689	3	2	Median	10.3	11.1	304650000	130390000	174260000	86629000	36791000
P40693	P40693	2	2	2	Ribosome biogenesis protein RLP7	RLP7	>sp|P40693|RLP7_YEAST Ribosome biogenesis protein RLP7 OS=Saccharomyces cerevisiae (strain ATCC 204508 / S288c) GN=RLP7 PE=1 SV=1	1	2	2	2	2	2	2	2	2	2	6.5	6.5	6.5	36.559	322	322	0	0.64548	0.71893	48.583	3	0	Median	0.6375	0.71619	0.53967	2	0	Median	1.3969	1.2038	45.56	2	1	Median	6.5	6.5	192680000	106190000	86484000	80913000	51449000
P40825-2;P40825	P40825-2;P40825	13;13	13;13	13;13	Alanine--tRNA ligase, mitochondrial	ALA1	>sp|P40825-2|SYA_YEAST Isoform Cytoplasmic of Alanine--tRNA ligase, mitochondrial OS=Saccharomyces cerevisiae (strain ATCC 204508 / S288c) GN=ALA1;>sp|P40825|SYA_YEAST Alanine--tRNA ligase, mitochondrial OS=Saccharomyces cerevisiae (strain ATCC 204508 / S2	2	13	13	13	10	9	10	9	10	9	14.1	14.1	14.1	107.28	958	958;983	0	1.163	1.1231	30.603	19	0	Median	0.98503	1.043	26.228	9	0	Median	1.3645	1.1421	35.298	10	0	Median	11.7	9.4	1973200000	932820000	1040400000	951930000	474050000
P40858	P40858	2	2	2	54S ribosomal protein L49, mitochondrial	MRPL49	>sp|P40858|RN49_YEAST 54S ribosomal protein L49, mitochondrial OS=Saccharomyces cerevisiae (strain ATCC 204508 / S288c) GN=MRPL49 PE=1 SV=2	1	2	2	2	2	2	2	2	2	2	14.3	14.3	14.3	18.387	161	161	0	0.81322	0.88566	4.6699	3	0	Median	0.79547	0.89369	1.2766	2	0	Median	1.2063	1.0504	34.077	2	1	Median	14.3	14.3	154260000	79182000	75081000	71548000	42591000
P40961	P40961	6	6	6	Prohibitin-1	PHB1	>sp|P40961|PHB1_YEAST Prohibitin-1 OS=Saccharomyces cerevisiae (strain ATCC 204508 / S288c) GN=PHB1 PE=1 SV=2	1	6	6	6	4	6	4	6	4	6	19.2	19.2	19.2	31.427	287	287	0	1.1723	1.0862	23.849	9	0	Median	0.73617	0.83644	28.561	3	0	Median	1.3833	1.1749	23.34	6	0	Median	12.9	19.2	683040000	307960000	375080000	308590000	153940000
P40991	P40991	3	3	3	Putative ribosomal RNA methyltransferase Nop2	NOP2	>sp|P40991|NOP2_YEAST Putative ribosomal RNA methyltransferase Nop2 OS=Saccharomyces cerevisiae (strain ATCC 204508 / S288c) GN=NOP2 PE=1 SV=1	1	3	3	3	2	3	2	3	2	3	7.9	7.9	7.9	69.811	618	618	0	0.90181	0.91982	16.577	4	0	Median	0.83129	0.91982	8.936	2	0	Median	1.4127	1.1517	26.167	3	1	Median	5.5	7.9	167820000	86198000	81622000	75226000	43289000
P41056	P41056	12	2	2	60S ribosomal protein L33-B	RPL33B	>sp|P41056|RL33B_YEAST 60S ribosomal protein L33-B OS=Saccharomyces cerevisiae (strain ATCC 204508 / S288c) GN=RPL33B PE=1 SV=2	1	12	2	2	12	11	2	2	2	2	66.4	15.9	15.9	12.168	107	107	0	0.72575	0.83089	35.097	3	0	Median	0.55864	0.62632	39.971	2	0	Median	1.5165	1.2743	49.489	2	1	Median	66.4	65.4	351120000	186300000	164820000	169280000	98893000
P41057	P41057	8	8	7	40S ribosomal protein S29-A	RPS29A	>sp|P41057|RS29A_YEAST 40S ribosomal protein S29-A OS=Saccharomyces cerevisiae (strain ATCC 204508 / S288c) GN=RPS29A PE=1 SV=3	1	8	8	7	8	8	8	8	7	7	73.2	73.2	53.6	6.6606	56	56	0	1.0971	0.99135	71.822	30	0	Median	1.3371	1.4946	50.265	15	0	Median	0.82565	0.67816	39.187	15	0	Median	73.2	73.2	11707000000	5597900000	6109000000	6078700000	2509000000
P41058	P41058	7	6	6	40S ribosomal protein S29-B	RPS29B	>sp|P41058|RS29B_YEAST 40S ribosomal protein S29-B OS=Saccharomyces cerevisiae (strain ATCC 204508 / S288c) GN=RPS29B PE=1 SV=3	1	7	6	6	7	6	6	5	6	5	69.6	50	50	6.7276	56	56	0	1.1418	0.98333	61.5	17	0	Median	1.2127	1.3912	52.008	8	0	Median	0.89921	0.79076	41.443	9	0	Median	69.6	69.6	4513900000	2034800000	2479200000	2447400000	1052400000
P41277	P41277	6	2	2	(DL)-glycerol-3-phosphatase 1	RHR2	>sp|P41277|GPP1_YEAST Glycerol-1-phosphate phosphohydrolase 1 OS=Saccharomyces cerevisiae (strain ATCC 204508 / S288c) GN=RHR2 PE=1 SV=3	1	6	2	2	3	5	0	2	0	2	23.2	6.4	6.4	27.947	250	250	0	0.95765	0.75932	37.487	2	1	Median	NaN	NaN	NaN	0	0	Median	0.95765	0.75932	37.487	2	1	Median	13.2	18.8	125730000	64136000	61598000	0	0
P41338	P41338	20	20	20	Acetyl-CoA acetyltransferase	ERG10	>sp|P41338|THIL_YEAST Acetyl-CoA acetyltransferase OS=Saccharomyces cerevisiae (strain ATCC 204508 / S288c) GN=ERG10 PE=1 SV=3	1	20	20	20	18	19	18	19	18	19	58.3	58.3	58.3	41.728	398	398	0	1.0655	0.96422	42.657	38	0	Median	1.1471	1.3384	35.61	18	0	Median	0.92003	0.79274	30.428	20	0	Median	53.8	57.5	7198500000	3625600000	3572900000	3471400000	1759000000
P41805	P41805	22	22	22	60S ribosomal protein L10	RPL10	>sp|P41805|RL10_YEAST 60S ribosomal protein L10 OS=Saccharomyces cerevisiae (strain ATCC 204508 / S288c) GN=RPL10 PE=1 SV=1	1	22	22	22	20	19	20	19	20	19	67.4	67.4	67.4	25.361	221	221	0	1.076	1.1142	50.045	47	0	Median	1.076	1.2203	39.397	25	0	Median	1.0646	0.88527	49.023	22	0	Median	62.4	64.7	25725000000	11576000000	14149000000	13425000000	6265400000
P41807	P41807	8	8	8	V-type proton ATPase subunit H	VMA13	>sp|P41807|VATH_YEAST V-type proton ATPase subunit H OS=Saccharomyces cerevisiae (strain ATCC 204508 / S288c) GN=VMA13 PE=1 SV=1	1	8	8	8	8	8	8	8	8	8	16.1	16.1	16.1	54.415	478	478	0	1.0549	0.98234	14.994	14	0	Median	0.83658	0.96699	17.988	6	0	Median	1.1694	0.98652	13.651	8	0	Median	16.1	16.1	1978000000	994610000	983430000	965070000	517390000
P41810	P41810	14	14	14	Coatomer subunit beta	SEC26	>sp|P41810|COPB_YEAST Coatomer subunit beta OS=Saccharomyces cerevisiae (strain ATCC 204508 / S288c) GN=SEC26 PE=1 SV=2	1	14	14	14	12	10	12	10	12	10	15.4	15.4	15.4	109.02	973	973	0	1.0253	0.96739	36.664	13	0	Median	1.0574	1.2174	42.737	6	0	Median	1.0253	0.89321	29.732	7	0	Median	14.2	10.1	1560300000	1015700000	544610000	710540000	452280000
P41811	P41811	14	14	14	Coatomer subunit beta	SEC27	>sp|P41811|COPB2_YEAST Coatomer subunit beta OS=Saccharomyces cerevisiae (strain ATCC 204508 / S288c) GN=SEC27 PE=1 SV=1	1	14	14	14	8	12	8	12	8	12	17.4	17.4	17.4	99.444	889	889	0	0.88565	0.84458	33.528	19	0	Median	0.7806	0.90428	38.132	8	0	Median	0.94854	0.82844	27.605	11	0	Median	11.2	14.8	1452000000	758790000	693220000	628350000	343040000
P41835	P41835	2	2	2	Thiamine biosynthetic bifunctional enzyme;Thiamine-phosphate synthase;Hydroxyethylthiazole kinase	THI6	>sp|P41835|THI6_YEAST Thiamine biosynthetic bifunctional enzyme OS=Saccharomyces cerevisiae (strain ATCC 204508 / S288c) GN=THI6 PE=3 SV=1	1	2	2	2	2	2	2	2	2	2	4.6	4.6	4.6	58.058	540	540	0	0.65626	1.0887	82.536	4	2	Linear	0.43597	0.49035	124.89	2	1	Median	0.66708	0.53786	68.94	2	1	Median	4.6	4.6	272460000	204380000	68085000	180400000	144440000
P41911	P41911	2	2	2	Glycerol-3-phosphate dehydrogenase [NAD(+)] 2, mitochondrial	GPD2	>sp|P41911|GPD2_YEAST Glycerol-3-phosphate dehydrogenase [NAD(+)] 2, mitochondrial OS=Saccharomyces cerevisiae (strain ATCC 204508 / S288c) GN=GPD2 PE=1 SV=2	1	2	2	2	2	1	2	1	2	1	4.5	4.5	4.5	49.421	440	440	0.00088183	0.80478	0.87678	57.87	4	2	Median	0.72812	0.82528	66.064	3	2	Median	NaN	NaN	NaN	1	0	Median	4.5	3	99811000	53188000	46623000	65994000	38670000
P41920	P41920	4	4	4	Ran-specific GTPase-activating protein 1	YRB1	>sp|P41920|YRB1_YEAST Ran-specific GTPase-activating protein 1 OS=Saccharomyces cerevisiae (strain ATCC 204508 / S288c) GN=YRB1 PE=1 SV=1	1	4	4	4	4	2	4	2	4	2	29.9	29.9	29.9	22.953	201	201	0	1.3087	1.2004	43.591	4	0	Median	0.82391	0.905	68.708	4	2	Median	1.3087	1.2004	10.311	2	0	Median	29.9	14.9	232820000	112960000	119850000	169460000	86995000
P41921	P41921	2	2	2	Glutathione reductase	GLR1	>sp|P41921|GSHR_YEAST Glutathione reductase OS=Saccharomyces cerevisiae (strain ATCC 204508 / S288c) GN=GLR1 PE=1 SV=2	1	2	2	2	2	1	2	1	2	1	5.4	5.4	5.4	53.44	483	483	0	1.4621	1.2145	34.821	3	0	Median	1.2986	1.4729	46.657	2	0	Median	NaN	NaN	NaN	1	0	Median	5.4	2.9	216410000	101880000	114530000	121520000	61942000
P41939;P53982	P41939	21;4	21;4	17;1	Isocitrate dehydrogenase [NADP] cytoplasmic	IDP2	>sp|P41939|IDHC_YEAST Isocitrate dehydrogenase [NADP] cytoplasmic OS=Saccharomyces cerevisiae (strain ATCC 204508 / S288c) GN=IDP2 PE=1 SV=2	2	21	21	17	19	17	19	17	16	13	54.6	54.6	46.6	46.562	412	412;420	0	0.98535	0.96714	38.864	38	0	Median	1.0688	1.2109	25.38	20	0	Median	0.90155	0.80086	35.939	18	0	Median	50	45.6	5529300000	2815600000	2713700000	2755600000	1426400000
P41940	P41940	12	12	12	Mannose-1-phosphate guanyltransferase	PSA1	>sp|P41940|MPG1_YEAST Mannose-1-phosphate guanyltransferase OS=Saccharomyces cerevisiae (strain ATCC 204508 / S288c) GN=PSA1 PE=1 SV=2	1	12	12	12	11	12	11	12	11	12	36.8	36.8	36.8	39.565	361	361	0	1.0016	0.95664	48.04	24	0	Median	0.82684	0.94693	51.387	12	0	Median	1.1253	0.95664	42.252	12	0	Median	35.5	36.8	6101000000	3020600000	3080400000	3012400000	1450300000
P42826	P42826	1	1	1	Xylulose kinase	XKS1	>sp|P42826|XKS1_YEAST Xylulose kinase OS=Saccharomyces cerevisiae (strain ATCC 204508 / S288c) GN=XKS1 PE=1 SV=2	1	1	1	1	0	1	0	1	0	1	1.8	1.8	1.8	68.32	600	600	0	NaN	NaN	NaN	1	0	Median	NaN	NaN	NaN	0	0	Median	NaN	NaN	NaN	1	0	Median	0	1.8	44777000	24052000	20725000	0	0
P42846	P42846	4	4	4	Protein KRI1	KRI1	>sp|P42846|KRI1_YEAST Protein KRI1 OS=Saccharomyces cerevisiae (strain ATCC 204508 / S288c) GN=KRI1 PE=1 SV=1	1	4	4	4	4	2	4	2	4	2	8.1	8.1	8.1	68.653	591	591	0	0.64306	0.72988	45.51	8	6	Median	0.56939	0.65266	17.512	5	4	Median	1.5335	1.2388	36.542	3	2	Median	8.1	3.2	419770000	225250000	194520000	221300000	146260000
P42847	P42847	1	1	1	37S ribosomal protein S18, mitochondrial	MRPS18	>sp|P42847|RT18_YEAST 37S ribosomal protein S18, mitochondrial OS=Saccharomyces cerevisiae (strain ATCC 204508 / S288c) GN=MRPS18 PE=1 SV=2	1	1	1	1	1	1	1	1	1	1	4.6	4.6	4.6	24.563	217	217	0	1.1404	1.1373	76.693	2	0	Median	NaN	NaN	NaN	1	0	Median	NaN	NaN	NaN	1	0	Median	4.6	4.6	68450000	32390000	36060000	34783000	19811000
P42934	P42934	1	1	1	Dolichyl-phosphate-mannose--protein mannosyltransferase 6	PMT6	>sp|P42934|PMT6_YEAST Dolichyl-phosphate-mannose--protein mannosyltransferase 6 OS=Saccharomyces cerevisiae (strain ATCC 204508 / S288c) GN=PMT6 PE=1 SV=1	1	1	1	1	0	1	0	1	0	1	2.2	2.2	2.2	88.025	759	759	0	NaN	NaN	NaN	1	0	Median	NaN	NaN	NaN	0	0	Median	NaN	NaN	NaN	1	0	Median	0	2.2	42681000	22940000	19741000	0	0
P42940	P42940	2	2	2	Probable electron transfer flavoprotein subunit beta	CIR1	>sp|P42940|ETFB_YEAST Probable electron transfer flavoprotein subunit beta OS=Saccharomyces cerevisiae (strain ATCC 204508 / S288c) GN=CIR1 PE=1 SV=1	1	2	2	2	2	2	2	2	2	2	12.3	12.3	12.3	28.758	261	261	0	1.045	1.0125	39.863	4	0	Median	1.2495	1.3498	1.0008	2	0	Median	0.78842	0.68799	14.988	2	0	Median	12.3	12.3	232570000	117920000	114650000	133180000	63260000
P42943	P42943	4	4	4	T-complex protein 1 subunit eta	CCT7	>sp|P42943|TCPH_YEAST T-complex protein 1 subunit eta OS=Saccharomyces cerevisiae (strain ATCC 204508 / S288c) GN=CCT7 PE=1 SV=1	1	4	4	4	3	3	3	3	3	3	7.5	7.5	7.5	59.735	550	550	0	1.2871	1.0799	26.954	4	0	Median	0.82807	0.95556	36.007	3	1	Median	1.3008	1.0674	78.434	3	1	Plateau	6	5.5	470320000	279240000	191080000	185900000	101760000
P42949	P42949	2	2	2	Mitochondrial import inner membrane translocase subunit TIM16	PAM16	>sp|P42949|TIM16_YEAST Mitochondrial import inner membrane translocase subunit TIM16 OS=Saccharomyces cerevisiae (strain ATCC 204508 / S288c) GN=PAM16 PE=1 SV=1	1	2	2	2	1	2	1	2	1	2	11.4	11.4	11.4	16.216	149	149	0	4.3665	4.8903	122.19	3	1	Plateau	NaN	NaN	NaN	1	0	Median	1.1767	0.93999	106.55	2	1	Median	5.4	11.4	151200000	67505000	83695000	50363000	12296000
P43535	P43535	2	2	2	Protein GCN20	GCN20	>sp|P43535|GCN20_YEAST Protein GCN20 OS=Saccharomyces cerevisiae (strain ATCC 204508 / S288c) GN=GCN20 PE=1 SV=1	1	2	2	2	1	1	1	1	1	1	2.5	2.5	2.5	85.026	752	752	0	0.94026	0.94024	63.166	2	0	Median	NaN	NaN	NaN	1	0	Median	NaN	NaN	NaN	1	0	Median	1.1	1.5	87389000	41119000	46270000	30658000	18793000
P53824;P43545	P53824;P43545	4;4	2;2	2;2	Probable pyridoxine biosynthesis protein SNZ2;Probable pyridoxine biosynthesis protein SNZ3	SNZ2;SNZ3	>sp|P53824|SNZ2_YEAST Probable pyridoxine biosynthesis protein SNZ2 OS=Saccharomyces cerevisiae (strain ATCC 204508 / S288c) GN=SNZ2 PE=1 SV=1;>sp|P43545|SNZ3_YEAST Probable pyridoxine biosynthesis protein SNZ3 OS=Saccharomyces cerevisiae (strain ATCC 2045	2	4	2	2	2	4	1	2	1	2	15.4	7.7	7.7	32.033	298	298;298	0	0.94966	1.061	35.125	3	1	Plateau	NaN	NaN	NaN	1	1	Median	0.82204	0.68496	34.398	2	0	Median	6.4	15.4	106730000	57085000	49645000	46242000	23663000
P43567	P43567	2	2	2	Alanine--glyoxylate aminotransferase 1	AGX1	>sp|P43567|AGX1_YEAST Alanine--glyoxylate aminotransferase 1 OS=Saccharomyces cerevisiae (strain ATCC 204508 / S288c) GN=AGX1 PE=1 SV=1	1	2	2	2	1	2	1	2	1	2	7	7	7	41.907	385	385	0	0.85717	0.71698	42.776	3	1	Median	NaN	NaN	NaN	1	0	Median	0.82495	0.70556	2.2699	2	1	Median	5.2	7	54523000	27451000	27071000	22758000	11487000
P43586	P43586	5	5	5	60S ribosomal subunit assembly/export protein LOC1	LOC1	>sp|P43586|LOC1_YEAST 60S ribosomal subunit assembly/export protein LOC1 OS=Saccharomyces cerevisiae (strain ATCC 204508 / S288c) GN=LOC1 PE=1 SV=1	1	5	5	5	4	4	4	4	4	4	27.9	27.9	27.9	23.59	204	204	0	0.97938	0.97572	73.309	6	0	Median	0.48899	0.53966	8.7766	3	0	Median	2.2244	1.8745	19.548	3	0	Median	21.6	22.1	943690000	438270000	505430000	515310000	318630000
P43588	P43588	4	4	4	26S proteasome regulatory subunit RPN11	RPN11	>sp|P43588|RPN11_YEAST Ubiquitin carboxyl-terminal hydrolase RPN11 OS=Saccharomyces cerevisiae (strain ATCC 204508 / S288c) GN=RPN11 PE=1 SV=1	1	4	4	4	3	4	3	4	3	4	15.7	15.7	15.7	34.398	306	306	0	0.96272	0.80451	20.76	5	0	Median	0.65078	0.70574	23.226	4	2	Median	0.96655	0.85676	15.877	3	0	Median	12.4	15.7	202320000	107780000	94534000	94336000	55609000
P43593	P43593	2	2	2	Ubiquitin carboxyl-terminal hydrolase 6	UBP6	>sp|P43593|UBP6_YEAST Ubiquitin carboxyl-terminal hydrolase 6 OS=Saccharomyces cerevisiae (strain ATCC 204508 / S288c) GN=UBP6 PE=1 SV=1	1	2	2	2	1	1	1	1	1	1	4.2	4.2	4.2	57.11	499	499	0	NaN	NaN	NaN	1	0	Median	NaN	NaN	NaN	1	0	Median	NaN	NaN	NaN	0	0	Median	2.2	2	42541000	20772000	21769000	42541000	20772000
P43598	P43598	2	2	2	Inhibitor of glycogen debranching 1	IGD1	>sp|P43598|IGD1_YEAST Inhibitor of glycogen debranching 1 OS=Saccharomyces cerevisiae (strain ATCC 204508 / S288c) GN=IGD1 PE=1 SV=1	1	2	2	2	0	2	0	2	0	2	16.4	16.4	16.4	21.783	195	195	0	NaN	NaN	NaN	1	0	Median	NaN	NaN	NaN	0	0	Median	NaN	NaN	NaN	1	0	Median	0	16.4	5517000	2815000	2702000	0	0
P43603;P32793	P43603;P32793	2;1	2;1	2;1	LAS seventeen-binding protein 3;Protein YSC84	LSB3;YSC84	>sp|P43603|LSB3_YEAST LAS seventeen-binding protein 3 OS=Saccharomyces cerevisiae (strain ATCC 204508 / S288c) GN=LSB3 PE=1 SV=3;>sp|P32793|YSC84_YEAST Protein YSC84 OS=Saccharomyces cerevisiae (strain ATCC 204508 / S288c) GN=YSC84 PE=1 SV=2	2	2	2	2	2	2	2	2	2	2	4.4	4.4	4.4	49.343	459	459;468	0	1.0001	1.0896	35.208	4	0	Median	1.0001	1.0982	20.411	2	0	Median	1.0017	0.86348	52.191	2	0	Median	4.4	4.4	317150000	150450000	166700000	157430000	84162000
P43616	P43616	9	9	9	Cys-Gly metallodipeptidase DUG1	DUG1	>sp|P43616|DUG1_YEAST Cys-Gly metallodipeptidase DUG1 OS=Saccharomyces cerevisiae (strain ATCC 204508 / S288c) GN=DUG1 PE=1 SV=1	1	9	9	9	8	9	8	9	8	9	24.3	24.3	24.3	52.871	481	481	0	1.0014	0.95415	28.551	13	0	Median	1.0408	1.167	28.201	8	0	Median	1.0014	0.84386	21.375	5	0	Median	22.2	24.3	1660200000	786670000	873540000	790140000	398330000
P43621	P43621	9	9	9	Coatomer subunit delta	RET2	>sp|P43621|COPD_YEAST Coatomer subunit delta OS=Saccharomyces cerevisiae (strain ATCC 204508 / S288c) GN=RET2 PE=1 SV=3	1	9	9	9	9	7	9	7	9	7	15.4	15.4	15.4	60.627	546	546	0	0.90672	0.98354	35.738	18	0	Median	0.88458	1.0205	29.854	10	0	Median	0.93551	0.78529	36.451	8	0	Median	15.4	12.8	2219600000	1108300000	1111300000	1314000000	674340000
P43623	P43623	4	4	4	Putative cystathionine beta-lyase	IRC7	>sp|P43623|METC_YEAST Putative cystathionine beta-lyase OS=Saccharomyces cerevisiae (strain ATCC 204508 / S288c) GN=IRC7 PE=1 SV=1	1	4	4	4	4	2	4	2	4	2	12.4	12.4	12.4	36.971	340	340	0	1.0928	0.85687	28.596	5	0	Median	1.0928	1.2085	38.044	3	0	Median	1.0259	0.84678	1.6744	2	0	Median	12.4	7.9	284680000	158190000	126490000	174140000	101640000
P43638	P43638	2	2	2	MAP-homologous protein 1	MHP1	>sp|P43638|MHP1_YEAST MAP-homologous protein 1 OS=Saccharomyces cerevisiae (strain ATCC 204508 / S288c) GN=MHP1 PE=1 SV=1	1	2	2	2	0	2	0	2	0	2	1.6	1.6	1.6	155.21	1398	1398	0	0.72349	0.64714	62.182	2	1	Median	NaN	NaN	NaN	0	0	Median	0.72349	0.64714	62.182	2	1	Median	0	1.6	41613000	22689000	18924000	0	0
P43639	P43639	1	1	1	Casein kinase II subunit beta	CKB1	>sp|P43639|CSK2B_YEAST Casein kinase II subunit beta OS=Saccharomyces cerevisiae (strain ATCC 204508 / S288c) GN=CKB1 PE=1 SV=1	1	1	1	1	1	1	1	1	1	1	5	5	5	32.264	278	278	0	1.2199	1.2419	16.936	2	0	Median	NaN	NaN	NaN	1	0	Median	NaN	NaN	NaN	1	0	Median	5	5	53958000	25703000	28255000	24445000	12997000
P45978	P45978	1	1	1	Protein SCD6	SCD6	>sp|P45978|SCD6_YEAST Protein SCD6 OS=Saccharomyces cerevisiae (strain ATCC 204508 / S288c) GN=SCD6 PE=1 SV=1	1	1	1	1	1	1	1	1	1	1	4.3	4.3	4.3	39.189	349	349	0	1.0393	1.0114	43.52	2	0	Median	NaN	NaN	NaN	1	0	Median	NaN	NaN	NaN	1	0	Median	4.3	4.3	94433000	52777000	41656000	47936000	22951000
P46367	P46367	31	31	31	Potassium-activated aldehyde dehydrogenase, mitochondrial	ALD4	>sp|P46367|ALDH4_YEAST Potassium-activated aldehyde dehydrogenase, mitochondrial OS=Saccharomyces cerevisiae (strain ATCC 204508 / S288c) GN=ALD4 PE=1 SV=2	1	31	31	31	28	27	28	27	28	27	67.2	67.2	67.2	56.723	519	519	0	1.0287	1.0045	35.921	70	0	Median	1.0682	1.2335	31.29	34	0	Median	1.0166	0.82957	30.022	36	0	Median	60.5	63.4	22092000000	10433000000	11659000000	11009000000	5089600000
P46655	P46655	69	69	69	Glutamate--tRNA ligase, cytoplasmic	GUS1	>sp|P46655|SYEC_YEAST Glutamate--tRNA ligase, cytoplasmic OS=Saccharomyces cerevisiae (strain ATCC 204508 / S288c) GN=GUS1 PE=1 SV=3	1	69	69	69	62	61	62	61	62	61	61	61	61	80.842	708	708	0	1.0239	0.98234	61.574	187	0	Median	1.1711	1.3402	47.324	97	0	Median	0.83946	0.70092	46.139	90	0	Median	60.9	55.5	251000000000	110060000000	140940000000	117860000000	49557000000
P46669	P46669	22	22	22	DNA-directed RNA polymerase I subunit RPA43	RPA43	>sp|P46669|RPA43_YEAST DNA-directed RNA polymerase I subunit RPA43 OS=Saccharomyces cerevisiae (strain ATCC 204508 / S288c) GN=RPA43 PE=1 SV=2	1	22	22	22	20	21	20	21	20	21	43.6	43.6	43.6	36.224	326	326	0	0.99425	0.99354	63.44	47	0	Median	1.4224	1.6242	35.764	24	0	Median	0.69909	0.59575	40.543	23	0	Median	43.6	42.9	33468000000	17260000000	16207000000	16283000000	8158900000
P46672	P46672	41	41	41	GU4 nucleic-binding protein 1	ARC1	>sp|P46672|G4P1_YEAST GU4 nucleic-binding protein 1 OS=Saccharomyces cerevisiae (strain ATCC 204508 / S288c) GN=ARC1 PE=1 SV=2	1	41	41	41	40	40	40	40	40	40	77.4	77.4	77.4	42.083	376	376	0	0.94153	0.92571	81.575	159	0	Median	1.6649	1.9055	43.031	79	0	Median	0.65251	0.51315	41.761	80	0	Median	70.2	77.4	378810000000	177460000000	201360000000	189030000000	73465000000
P46680	P46680	3	3	3	Actin-interacting protein 1	AIP1	>sp|P46680|AIP1_YEAST Actin-interacting protein 1 OS=Saccharomyces cerevisiae (strain ATCC 204508 / S288c) GN=AIP1 PE=1 SV=1	1	3	3	3	2	2	2	2	2	2	4.4	4.4	4.4	67.325	615	615	0	1.1236	1.0848	21.452	4	0	Median	0.85885	0.9331	28.272	2	0	Median	1.2778	1.1377	13.715	2	0	Median	2.9	3.3	132600000	64681000	67917000	52746000	30673000
P46681	P46681	1	1	1	D-lactate dehydrogenase [cytochrome] 2, mitochondrial	DLD2	>sp|P46681|DLD2_YEAST D-lactate dehydrogenase [cytochrome] 2, mitochondrial OS=Saccharomyces cerevisiae (strain ATCC 204508 / S288c) GN=DLD2 PE=1 SV=1	1	1	1	1	1	1	1	1	1	1	1.9	1.9	1.9	59.268	530	530	0	0.81573	0.7962	7.376	2	2	Median	NaN	NaN	NaN	1	1	Median	NaN	NaN	NaN	1	1	Median	1.9	1.9	126880000	71250000	55631000	61501000	36285000
P46964	P46964	1	1	1	Dolichyl-diphosphooligosaccharide--protein glycosyltransferase subunit OST2	OST2	>sp|P46964|OST2_YEAST Dolichyl-diphosphooligosaccharide--protein glycosyltransferase subunit OST2 OS=Saccharomyces cerevisiae (strain ATCC 204508 / S288c) GN=OST2 PE=1 SV=3	1	1	1	1	1	1	1	1	1	1	13.1	13.1	13.1	14.697	130	130	0	1.0305	0.94986	14.087	3	0	Median	NaN	NaN	NaN	1	0	Median	1.0634	0.93085	2.8585	2	0	Median	13.1	13.1	31043000	14568000	16475000	8513800	4257100
P46969	P46969	1	1	1	Ribulose-phosphate 3-epimerase	RPE1	>sp|P46969|RPE_YEAST Ribulose-phosphate 3-epimerase OS=Saccharomyces cerevisiae (strain ATCC 204508 / S288c) GN=RPE1 PE=1 SV=1	1	1	1	1	1	0	1	0	1	0	9.7	9.7	9.7	25.967	238	238	0	NaN	NaN	NaN	1	0	Median	NaN	NaN	NaN	1	0	Median	NaN	NaN	NaN	0	0	Median	9.7	0	8233000	2956600	5276400	8233000	2956600
P46988	P46988	2	2	2	Prefoldin subunit 1	PFD1	>sp|P46988|PFD1_YEAST Prefoldin subunit 1 OS=Saccharomyces cerevisiae (strain ATCC 204508 / S288c) GN=PFD1 PE=1 SV=2	1	2	2	2	0	2	0	2	0	2	14.7	14.7	14.7	12.782	109	109	0	NaN	NaN	NaN	0	0	Median	NaN	NaN	NaN	0	0	Median	NaN	NaN	NaN	0	0	Median	0	14.7	3781000	0	3781000	0	0
P46990;P05740	P46990;P05740	21;19	21;19	21;19	60S ribosomal protein L17-B;60S ribosomal protein L17-A	RPL17B;RPL17A	>sp|P46990|RL17B_YEAST 60S ribosomal protein L17-B OS=Saccharomyces cerevisiae (strain ATCC 204508 / S288c) GN=RPL17B PE=1 SV=2;>sp|P05740|RL17A_YEAST 60S ribosomal protein L17-A OS=Saccharomyces cerevisiae (strain ATCC 204508 / S288c) GN=RPL17A PE=1 SV=4	2	21	21	21	19	20	19	20	19	20	78.3	78.3	78.3	20.551	184	184;184	0	1.14	1.0188	33.258	39	0	Median	0.86878	0.98797	33.234	19	0	Median	1.332	1.0279	33.776	20	0	Median	78.3	78.3	81354000000	38643000000	42711000000	40058000000	23666000000
P46992	P46992	1	1	1	Cell wall protein YJL171C		>sp|P46992|YJR1_YEAST Cell wall protein YJL171C OS=Saccharomyces cerevisiae (strain ATCC 204508 / S288c) GN=YJL171C PE=1 SV=2	1	1	1	1	1	1	1	1	1	1	3.5	3.5	3.5	42.957	396	396	0	1.123	1.1197	5.467	2	0	Median	NaN	NaN	NaN	1	0	Median	NaN	NaN	NaN	1	0	Median	3.5	3.5	221840000	101250000	120580000	100080000	50551000
P47006	P47006	10	10	10	DNA-directed RNA polymerase I subunit RPA34	RPA34	>sp|P47006|RPA34_YEAST DNA-directed RNA polymerase I subunit RPA34 OS=Saccharomyces cerevisiae (strain ATCC 204508 / S288c) GN=RPA34 PE=1 SV=1	1	10	10	10	8	8	8	8	8	8	36.1	36.1	36.1	26.875	233	233	0	1.051	1.01	54.448	12	0	Median	1.4865	1.7468	43.963	6	0	Median	0.68942	0.62355	31.091	6	0	Median	34.3	32.6	967230000	466620000	500610000	475540000	193870000
P47013	P47013	1	1	1	Dihydrosphingosine 1-phosphate phosphatase LCB3	LCB3	>sp|P47013|DS1P1_YEAST Dihydrosphingosine 1-phosphate phosphatase LCB3 OS=Saccharomyces cerevisiae (strain ATCC 204508 / S288c) GN=LCB3 PE=1 SV=1	1	1	1	1	1	0	1	0	1	0	2.4	2.4	2.4	47.371	409	409	0.0096852	NaN	NaN	NaN	1	0	Median	NaN	NaN	NaN	1	0	Median	NaN	NaN	NaN	0	0	Median	2.4	0	184970000	105360000	79611000	184970000	105360000
P47025	P47025	2	2	2	Mitochondrial division protein 1	MDV1	>sp|P47025|MDV1_YEAST Mitochondrial division protein 1 OS=Saccharomyces cerevisiae (strain ATCC 204508 / S288c) GN=MDV1 PE=1 SV=1	1	2	2	2	2	1	2	1	2	1	3.2	3.2	3.2	80.031	714	714	0	12.978	11.625	114.22	3	3	Plateau	2.8083	3.2297	123.11	2	2	Median	NaN	NaN	NaN	1	1	Median	3.2	1.5	111710000	20968000	90739000	63510000	17563000
P47044	P47044	2	2	2	LOG family protein YJL055W		>sp|P47044|YJF5_YEAST LOG family protein YJL055W OS=Saccharomyces cerevisiae (strain ATCC 204508 / S288c) GN=YJL055W PE=1 SV=1	1	2	2	2	2	1	2	1	2	1	11.8	11.8	11.8	26.864	245	245	0	1.0993	1.2172	33.235	3	0	Median	1.3815	1.5152	30.973	2	0	Median	NaN	NaN	NaN	1	0	Median	11.8	5.3	90002000	42372000	47629000	56497000	25515000
P47045	P47045	4	4	4	Mitochondrial import inner membrane translocase subunit TIM54	TIM54	>sp|P47045|TIM54_YEAST Mitochondrial import inner membrane translocase subunit TIM54 OS=Saccharomyces cerevisiae (strain ATCC 204508 / S288c) GN=TIM54 PE=1 SV=1	1	4	4	4	3	3	3	3	3	3	9.2	9.2	9.2	54.182	478	478	0	0.88073	1.0083	22.933	3	0	Median	0.9448	1.1074	90.708	3	2	Plateau	1.2017	1.1114	120.03	3	1	Plateau	7.5	6.5	151810000	79268000	72544000	92074000	46794000
P47052	P47052	5	1	1	Succinate dehydrogenase [ubiquinone] flavoprotein subunit 2, mitochondrial		>sp|P47052|SDHX_YEAST Succinate dehydrogenase [ubiquinone] flavoprotein subunit 2, mitochondrial OS=Saccharomyces cerevisiae (strain ATCC 204508 / S288c) GN=YJL045W PE=1 SV=1	1	5	1	1	5	4	1	1	1	1	9.3	2.7	2.7	69.382	634	634	0	0.8984	0.89286	67.429	2	0	Median	NaN	NaN	NaN	1	0	Median	NaN	NaN	NaN	1	0	Median	9.3	6	395590000	210850000	184740000	192160000	87093000
P47075	P47075	1	1	1	Vacuolar transporter chaperone 4	VTC4	>sp|P47075|VTC4_YEAST Vacuolar transporter chaperone 4 OS=Saccharomyces cerevisiae (strain ATCC 204508 / S288c) GN=VTC4 PE=1 SV=2	1	1	1	1	1	0	1	0	1	0	1.8	1.8	1.8	83.154	721	721	0	NaN	NaN	NaN	1	0	Median	NaN	NaN	NaN	1	0	Median	NaN	NaN	NaN	0	0	Median	1.8	0	26738000	8815100	17923000	26738000	8815100
P47079	P47079	9	9	9	T-complex protein 1 subunit theta	CCT8	>sp|P47079|TCPQ_YEAST T-complex protein 1 subunit theta OS=Saccharomyces cerevisiae (strain ATCC 204508 / S288c) GN=CCT8 PE=1 SV=1	1	9	9	9	7	6	7	6	7	6	19	19	19	61.662	568	568	0	0.87358	0.98896	25.727	13	0	Median	0.76278	0.87284	17.394	8	0	Median	1.4876	1.1161	22.295	5	0	Median	14.4	13.9	789700000	423650000	366050000	451260000	259210000
P47082	P47082	1	1	1	Vacuolar amino acid transporter 1	AVT1	>sp|P47082|AVT1_YEAST Vacuolar amino acid transporter 1 OS=Saccharomyces cerevisiae (strain ATCC 204508 / S288c) GN=AVT1 PE=1 SV=1	1	1	1	1	0	1	0	1	0	1	1.7	1.7	1.7	65.345	602	602	0.0042662	NaN	NaN	NaN	1	0	Median	NaN	NaN	NaN	0	0	Median	NaN	NaN	NaN	1	0	Median	0	1.7	90603000	27924000	62680000	0	0
P47083	P47083	3	3	3	U3 small nucleolar RNA-associated protein MPP10	MPP10	>sp|P47083|MPP10_YEAST U3 small nucleolar RNA-associated protein MPP10 OS=Saccharomyces cerevisiae (strain ATCC 204508 / S288c) GN=MPP10 PE=1 SV=1	1	3	3	3	2	2	2	2	2	2	5.1	5.1	5.1	66.952	593	593	0	1.189	1.0152	35.897	3	0	Median	1.1906	1.3658	41.956	2	0	Median	NaN	NaN	NaN	1	0	Median	3.7	3	202800000	101540000	101260000	123450000	63822000
P47089	P47089	1	1	1	Translation machinery-associated protein 22	TMA22	>sp|P47089|DENR_YEAST Translation machinery-associated protein 22 OS=Saccharomyces cerevisiae (strain ATCC 204508 / S288c) GN=TMA22 PE=1 SV=1	1	1	1	1	1	1	1	1	1	1	13.6	13.6	13.6	22.495	198	198	0	1.0543	1.0394	59.316	2	0	Median	NaN	NaN	NaN	1	0	Median	NaN	NaN	NaN	1	0	Median	13.6	13.6	57363000	29755000	27608000	28718000	12964000
P47117	P47117	3	3	3	Actin-related protein 3	ARP3	>sp|P47117|ARP3_YEAST Actin-related protein 3 OS=Saccharomyces cerevisiae (strain ATCC 204508 / S288c) GN=ARP3 PE=1 SV=1	1	3	3	3	2	3	2	3	2	3	10.9	10.9	10.9	49.541	449	449	0	1.0746	0.95359	33.107	6	0	Median	1.1162	1.3581	34.389	3	0	Median	1.0346	0.88211	20.547	3	0	Median	8.5	10.9	484840000	250640000	234190000	209520000	116760000
P47119	P47119	1	1	1	Inosine triphosphate pyrophosphatase	HAM1	>sp|P47119|ITPA_YEAST Inosine triphosphate pyrophosphatase OS=Saccharomyces cerevisiae (strain ATCC 204508 / S288c) GN=HAM1 PE=1 SV=1	1	1	1	1	0	1	0	1	0	1	5.1	5.1	5.1	22.093	197	197	0.0050676	NaN	NaN	NaN	0	0	Median	NaN	NaN	NaN	0	0	Median	NaN	NaN	NaN	0	0	Median	0	5.1	0	0	0	0	0
P47122	P47122	4	4	4	GTPase NPA3	NPA3	>sp|P47122|NPA3_YEAST GTPase NPA3 OS=Saccharomyces cerevisiae (strain ATCC 204508 / S288c) GN=NPA3 PE=1 SV=1	1	4	4	4	3	3	3	3	3	3	12.2	12.2	12.2	43.194	385	385	0	1.2488	1.0625	26.784	4	0	Median	1.2031	1.3364	102.95	4	2	Median	1.2488	1.0625	58.539	4	2	Median	9.9	8.1	265340000	123000000	142340000	121190000	61309000
P47127	P47127	1	1	1	Altered inheritance of mitochondria protein 24, mitochondrial	AIM24	>sp|P47127|AIM24_YEAST Altered inheritance of mitochondria protein 24, mitochondrial OS=Saccharomyces cerevisiae (strain ATCC 204508 / S288c) GN=AIM24 PE=1 SV=1	1	1	1	1	1	1	1	1	1	1	3.6	3.6	3.6	44.427	394	394	0.0058774	1.0036	0.98033	78.757	2	0	Median	NaN	NaN	NaN	1	0	Median	NaN	NaN	NaN	1	0	Median	3.6	3.6	101790000	48194000	53592000	49750000	19792000
P47137	P47137	3	3	3	Uncharacterized oxidoreductase YJR096W		>sp|P47137|YJ66_YEAST Uncharacterized oxidoreductase YJR096W OS=Saccharomyces cerevisiae (strain ATCC 204508 / S288c) GN=YJR096W PE=1 SV=1	1	3	3	3	1	2	1	2	1	2	11.3	11.3	11.3	32.344	282	282	0	0.84708	0.88089	18.012	3	0	Median	NaN	NaN	NaN	1	0	Median	1.0138	0.87188	25.459	2	0	Median	2.8	8.5	62455000	28359000	34096000	15186000	6969400
P47143	P47143	8	8	8	Adenosine kinase	ADO1	>sp|P47143|ADK_YEAST Adenosine kinase OS=Saccharomyces cerevisiae (strain ATCC 204508 / S288c) GN=ADO1 PE=1 SV=1	1	8	8	8	7	8	7	8	7	8	31.5	31.5	31.5	36.372	340	340	0	0.9186	1.0198	145.5	15	0	Median	0.90002	1.0198	177.43	7	0	Median	1.0765	0.88964	123.7	8	0	Median	25.3	31.5	2581800000	1239000000	1342800000	1304500000	666130000
P47150	P47150	6	6	6	37S ribosomal protein S7, mitochondrial	RSM7	>sp|P47150|RT07_YEAST 37S ribosomal protein S7, mitochondrial OS=Saccharomyces cerevisiae (strain ATCC 204508 / S288c) GN=RSM7 PE=1 SV=1	1	6	6	6	5	5	5	5	5	5	27.9	27.9	27.9	27.816	247	247	0	0.79774	0.81299	39.873	8	0	Median	0.71202	0.81299	35.253	4	0	Median	1.1495	0.95959	49.409	4	0	Median	21.9	23.1	365740000	184620000	181120000	172070000	96315000
P47154	P47154	2	2	2	CAAX prenyl protease 1	STE24	>sp|P47154|STE24_YEAST CAAX prenyl protease 1 OS=Saccharomyces cerevisiae (strain ATCC 204508 / S288c) GN=STE24 PE=1 SV=1	1	2	2	2	2	2	2	2	2	2	4	4	4	52.323	453	453	0	1.0461	0.99239	12.043	4	0	Median	0.82518	0.93434	6.1516	2	0	Median	1.3537	1.0971	11.81	2	0	Median	4	4	245720000	116120000	129610000	110990000	59626000
P47166	P47166	1	1	1	Protein SGM1	SGM1	>sp|P47166|SGM1_YEAST Protein SGM1 OS=Saccharomyces cerevisiae (strain ATCC 204508 / S288c) GN=SGM1 PE=1 SV=1	1	1	1	1	1	0	1	0	1	0	1	1	1	81.17	707	707	0.0017301	NaN	NaN	NaN	1	0	Median	NaN	NaN	NaN	1	0	Median	NaN	NaN	NaN	0	0	Median	1	0	19255000	8669300	10585000	19255000	8669300
P47169;REV__Q08491	P47169;REV__Q08491	2;1	2;1	2;1	Sulfite reductase [NADPH] subunit beta	MET5	>sp|P47169|MET5_YEAST Sulfite reductase [NADPH] subunit beta OS=Saccharomyces cerevisiae (strain ATCC 204508 / S288c) GN=MET5 PE=1 SV=1;>sp|Q08491|SKI7_YEAST Superkiller protein 7 OS=Saccharomyces cerevisiae (strain ATCC 204508 / S288c) GN=SKI7 PE=1 SV=1	2	2	2	2	2	1	2	1	2	1	1.3	1.3	1.3	161.22	1442	1442;747	0.00089047	0.4959	0.50057	39.168	2	1	Median	NaN	NaN	NaN	1	0	Median	NaN	NaN	NaN	1	1	Median	1.3	0.8	52883000	41790000	11094000	33104000	26038000
P47176	P47176	6	2	2	Branched-chain-amino-acid aminotransferase, cytosolic	BAT2	>sp|P47176|BCA2_YEAST Branched-chain-amino-acid aminotransferase, cytosolic OS=Saccharomyces cerevisiae (strain ATCC 204508 / S288c) GN=BAT2 PE=1 SV=1	1	6	2	2	4	5	1	2	1	2	15.4	7.4	7.4	41.624	376	376	0	1.2963	1.0375	28.34	3	2	Median	NaN	NaN	NaN	1	1	Median	1.3612	1.1215	11.005	2	1	Median	12	15.2	200220000	91845000	108380000	10951000	6519500
P47771	P47771	4	1	1	Aldehyde dehydrogenase [NAD(P)+] 1	ALD2	>sp|P47771|ALDH2_YEAST Aldehyde dehydrogenase [NAD(P)+] 1 OS=Saccharomyces cerevisiae (strain ATCC 204508 / S288c) GN=ALD2 PE=1 SV=2	1	4	1	1	3	3	0	1	0	1	9.3	3	3	55.187	506	506	0.0074319	1.351	1.1427	33.285	2	0	Median	NaN	NaN	NaN	0	0	Median	1.351	1.1427	33.285	2	0	Median	6.3	7.5	12841000	4448100	8393400	0	0
P47912;P39002	P47912	4;1	4;1	4;1	Long-chain-fatty-acid--CoA ligase 4	FAA4	>sp|P47912|LCF4_YEAST Long-chain-fatty-acid--CoA ligase 4 OS=Saccharomyces cerevisiae (strain ATCC 204508 / S288c) GN=FAA4 PE=1 SV=1	2	4	4	4	4	4	4	4	4	4	6.3	6.3	6.3	77.266	694	694;694	0	1.186	1.1045	24.203	5	0	Median	1.0456	1.207	33.41	4	2	Linear	1.2799	1.1045	18.251	3	0	Median	6.3	6.3	728190000	354070000	374120000	305020000	168870000
P48015	P48015	7	7	7	Aminomethyltransferase, mitochondrial	GCV1	>sp|P48015|GCST_YEAST Aminomethyltransferase, mitochondrial OS=Saccharomyces cerevisiae (strain ATCC 204508 / S288c) GN=GCV1 PE=1 SV=2	1	7	7	7	7	5	7	5	7	5	23.5	23.5	23.5	44.468	400	400	0	1.0644	1.221	45.257	8	0	Median	1.3459	1.3992	17.693	5	0	Median	0.72779	0.64754	15.891	3	0	Median	23.5	14.2	628210000	310370000	317840000	357850000	182520000
P48164	P48164	25	8	8	40S ribosomal protein S7-B	RPS7B	>sp|P48164|RS7B_YEAST 40S ribosomal protein S7-B OS=Saccharomyces cerevisiae (strain ATCC 204508 / S288c) GN=RPS7B PE=1 SV=1	1	25	8	8	22	24	7	7	7	7	88.9	46.3	46.3	21.634	190	190	0	1.0157	1.0855	16.115	18	0	Median	0.87392	1.0067	10.211	9	0	Median	1.4245	1.2135	20.43	9	0	Median	79.5	80.5	5724700000	2780400000	2944300000	2846300000	1544400000
P48445	P48445	8	8	8	Biotin--protein ligase;Biotin--[methylmalonyl-CoA-carboxytransferase] ligase;Biotin--[propionyl-CoA-carboxylase [ATP-hydrolyzing]] ligase;Biotin--[methylcrotonoyl-CoA-carboxylase] ligase;Biotin--[acetyl-CoA-carboxylase] ligase	BPL1	>sp|P48445|BPL1_YEAST Biotin--protein ligase OS=Saccharomyces cerevisiae (strain ATCC 204508 / S288c) GN=BPL1 PE=1 SV=1	1	8	8	8	8	7	8	7	8	7	18	18	18	76.362	690	690	0	4.6453	3.8366	145.93	7	0	Median	0.18838	0.2079	72.502	8	6	Median	4.8979	3.9183	15.112	5	0	Median	18	15.5	1103200000	580260000	522950000	606840000	494630000
P48527	P48527	1	1	1	Tyrosine--tRNA ligase, mitochondrial	MSY1	>sp|P48527|SYYM_YEAST Tyrosine--tRNA ligase, mitochondrial OS=Saccharomyces cerevisiae (strain ATCC 204508 / S288c) GN=MSY1 PE=1 SV=1	1	1	1	1	1	0	1	0	1	0	2.8	2.8	2.8	55.287	492	492	0	0.96283	1.0422	0.39534	2	2	Median	0.96283	1.0422	0.39534	2	2	Median	NaN	NaN	NaN	0	0	Median	2.8	0	70144000	37318000	32826000	70144000	37318000
P48567	P48567	2	2	2	tRNA pseudouridine synthase 4	PUS4	>sp|P48567|PUS4_YEAST tRNA pseudouridine synthase 4 OS=Saccharomyces cerevisiae (strain ATCC 204508 / S288c) GN=PUS4 PE=1 SV=1	1	2	2	2	2	1	2	1	2	1	6	6	6	45.273	403	403	0.0017452	1.1292	1.1555	14.964	3	0	Median	1.0865	1.2314	8.9966	2	0	Median	NaN	NaN	NaN	1	0	Median	6	2	140640000	68914000	71730000	80738000	40890000
P48589	P48589	9	9	9	40S ribosomal protein S12	RPS12	>sp|P48589|RS12_YEAST 40S ribosomal protein S12 OS=Saccharomyces cerevisiae (strain ATCC 204508 / S288c) GN=RPS12 PE=1 SV=1	1	9	9	9	9	5	9	5	9	5	42.7	42.7	42.7	15.471	143	143	0	0.91436	0.99176	46.647	11	0	Median	0.90473	1.0582	44.011	8	0	Median	0.91436	0.69561	8.3518	3	0	Median	42.7	35.7	12460000000	7291800000	5168500000	7007700000	3962400000
P48837	P48837	3	3	3	Nucleoporin NUP57	NUP57	>sp|P48837|NUP57_YEAST Nucleoporin NUP57 OS=Saccharomyces cerevisiae (strain ATCC 204508 / S288c) GN=NUP57 PE=1 SV=1	1	3	3	3	3	3	3	3	3	3	5.7	5.7	5.7	57.498	541	541	0	0.92074	0.90494	16.326	6	0	Median	0.86421	0.97025	20.385	3	0	Median	0.98097	0.84402	12.822	3	0	Median	5.7	5.7	156340000	79686000	76650000	81057000	43394000
P49089	P49089	15	15	8	Asparagine synthetase [glutamine-hydrolyzing] 1	ASN1	>sp|P49089|ASNS1_YEAST Asparagine synthetase [glutamine-hydrolyzing] 1 OS=Saccharomyces cerevisiae (strain ATCC 204508 / S288c) GN=ASN1 PE=1 SV=2	1	15	15	8	12	12	12	12	6	8	25.7	25.7	14.5	64.47	572	572	0	0.8932	0.97207	38.587	21	0	Median	0.87585	0.97226	37.046	11	0	Median	0.95553	0.87881	34.422	10	0	Median	21.9	20.8	2111400000	1316100000	795380000	1066400000	703350000
P49090	P49090	9	2	2	Asparagine synthetase [glutamine-hydrolyzing] 2	ASN2	>sp|P49090|ASNS2_YEAST Asparagine synthetase [glutamine-hydrolyzing] 2 OS=Saccharomyces cerevisiae (strain ATCC 204508 / S288c) GN=ASN2 PE=1 SV=2	1	9	2	2	8	6	2	2	2	2	15.7	4.5	4.5	64.592	572	572	0	0.8552	0.78132	87.551	5	4	Median	NaN	NaN	NaN	1	1	Median	0.82163	0.70813	92.59	4	3	Median	15	10.8	268200000	145540000	122660000	90423000	45847000
P49095	P49095	4	4	4	Glycine dehydrogenase [decarboxylating], mitochondrial	GCV2	>sp|P49095|GCSP_YEAST Glycine dehydrogenase (decarboxylating), mitochondrial OS=Saccharomyces cerevisiae (strain ATCC 204508 / S288c) GN=GCV2 PE=1 SV=1	1	4	4	4	2	4	2	4	2	4	4	4	4	114.45	1034	1034	0	0.82596	0.8207	24.616	6	0	Median	0.63989	0.72058	0.20429	2	0	Median	1.0618	0.93591	30.886	4	0	Median	1.9	4	194760000	106600000	88154000	62278000	38445000
P49166	P49166	15	15	8	60S ribosomal protein L37-A	RPL37A	>sp|P49166|RL37A_YEAST 60S ribosomal protein L37-A OS=Saccharomyces cerevisiae (strain ATCC 204508 / S288c) GN=RPL37A PE=1 SV=2	1	15	15	8	15	13	15	13	8	7	69.3	69.3	42	9.8502	88	88	0	1.008	1.0417	34.773	38	0	Median	0.88197	1.021	33.69	21	0	Median	1.4133	1.1439	33.29	17	0	Median	69.3	65.9	44015000000	18150000000	25865000000	22349000000	10478000000
P49167	P49167	10	10	10	60S ribosomal protein L38	RPL38	>sp|P49167|RL38_YEAST 60S ribosomal protein L38 OS=Saccharomyces cerevisiae (strain ATCC 204508 / S288c) GN=RPL38 PE=1 SV=1	1	10	10	10	9	8	9	8	9	8	71.8	71.8	71.8	8.8264	78	78	0	1.2884	1.1605	39.797	18	0	Median	1.2094	1.3447	40.105	9	0	Median	1.3511	1.1063	38.302	9	0	Median	70.5	61.5	2827000000	1347700000	1479300000	1326700000	688070000
P49334	P49334	4	4	4	Mitochondrial import receptor subunit TOM22	TOM22	>sp|P49334|TOM22_YEAST Mitochondrial import receptor subunit TOM22 OS=Saccharomyces cerevisiae (strain ATCC 204508 / S288c) GN=TOM22 PE=1 SV=3	1	4	4	4	4	4	4	4	4	4	18.4	18.4	18.4	16.79	152	152	0	1.0919	0.97214	33.674	5	0	Median	0.83758	0.97214	95.789	5	3	Median	1.0919	0.93106	34.699	3	0	Median	18.4	18.4	1007200000	535170000	471990000	485390000	276600000
P49367	P49367	1	1	1	Homoaconitase, mitochondrial	LYS4	>sp|P49367|LYS4_YEAST Homoaconitase, mitochondrial OS=Saccharomyces cerevisiae (strain ATCC 204508 / S288c) GN=LYS4 PE=1 SV=1	1	1	1	1	1	1	1	1	1	1	1.9	1.9	1.9	75.15	693	693	0	1.0461	1.003	50.244	2	0	Median	NaN	NaN	NaN	1	0	Median	NaN	NaN	NaN	1	0	Median	1.9	1.9	229420000	117310000	112110000	120850000	76035000
P49573	P49573	1	1	1	Copper transport protein CTR1	CTR1	>sp|P49573|CTR1_YEAST Copper transport protein CTR1 OS=Saccharomyces cerevisiae (strain ATCC 204508 / S288c) GN=CTR1 PE=1 SV=1	1	1	1	1	1	1	1	1	1	1	2.2	2.2	2.2	44.441	406	406	0.009764	1.214	1.2069	30.113	2	0	Median	NaN	NaN	NaN	1	0	Median	NaN	NaN	NaN	1	0	Median	2.2	2.2	123570000	50699000	72871000	55297000	27136000
P49723	P49723	6	6	6	Ribonucleoside-diphosphate reductase small chain 2	RNR4	>sp|P49723|RIR4_YEAST Ribonucleoside-diphosphate reductase small chain 2 OS=Saccharomyces cerevisiae (strain ATCC 204508 / S288c) GN=RNR4 PE=1 SV=1	1	6	6	6	6	4	6	4	6	4	16.5	16.5	16.5	40.054	345	345	0	0.92102	0.99539	13.326	7	0	Median	0.86136	0.98851	9.8685	4	0	Median	1.2042	1.0437	17.383	3	0	Median	16.5	13.6	1034800000	529130000	505660000	507810000	284230000
P50085	P50085	6	6	6	Prohibitin-2	PHB2	>sp|P50085|PHB2_YEAST Prohibitin-2 OS=Saccharomyces cerevisiae (strain ATCC 204508 / S288c) GN=PHB2 PE=1 SV=2	1	6	6	6	4	4	4	4	4	4	17.1	17.1	17.1	34.406	310	310	0	1.0153	0.92189	13.988	6	0	Median	0.79385	0.81232	20.839	3	0	Median	1.1176	0.96175	5.1903	3	0	Median	12.9	14.5	775690000	427170000	348520000	191600000	110860000
P50087	P50087	4	4	4	Mitochondrial organizing structure protein 2	MOS2	>sp|P50087|MOS2_YEAST Mitochondrial organizing structure protein 2 OS=Saccharomyces cerevisiae (strain ATCC 204508 / S288c) GN=MOS2 PE=1 SV=1	1	4	4	4	3	2	3	2	3	2	18.5	18.5	18.5	26.912	233	233	0	1.0387	0.99689	14.032	6	0	Median	0.87701	0.98017	10.399	3	0	Median	1.2088	1.0257	13.055	3	0	Median	15.5	9.4	971890000	458800000	513090000	580860000	297320000
P50094	P50094	16	9	9	Inosine-5-monophosphate dehydrogenase 4	IMD4	>sp|P50094|IMDH4_YEAST Inosine-5-monophosphate dehydrogenase 4 OS=Saccharomyces cerevisiae (strain ATCC 204508 / S288c) GN=IMD4 PE=1 SV=1	1	16	9	9	14	13	8	7	8	7	43.3	24.2	24.2	56.393	524	524	0	0.75858	0.81565	40.469	16	0	Median	0.68417	0.78129	30.744	10	0	Median	1.5463	1.3077	37.381	6	0	Median	38.4	34.2	2659900000	1341400000	1318500000	1368500000	870000000
P50095;P38697;O42831;P39567	P50095	18;8;3;3	18;8;3;3	11;3;1;2	Inosine-5-monophosphate dehydrogenase 3	IMD3	>sp|P50095|IMDH3_YEAST Inosine-5-monophosphate dehydrogenase 3 OS=Saccharomyces cerevisiae (strain ATCC 204508 / S288c) GN=IMD3 PE=1 SV=1	4	18	18	11	17	16	17	16	11	10	40.9	40.9	21.8	56.584	523	523;523;157;403	0	0.87224	0.91522	46.951	40	0	Median	0.5687	0.64151	34.997	22	0	Median	1.8375	1.4969	22.272	18	0	Median	36.1	37.9	9862200000	4732300000	5129900000	4903500000	2881500000
P50105	P50105	2	2	2	Transcription initiation factor TFIID subunit 4	TAF4	>sp|P50105|TAF4_YEAST Transcription initiation factor TFIID subunit 4 OS=Saccharomyces cerevisiae (strain ATCC 204508 / S288c) GN=TAF4 PE=1 SV=1	1	2	2	2	1	1	1	1	1	1	6.4	6.4	6.4	42.336	388	388	0	0.85303	0.83745	20.035	2	2	Median	NaN	NaN	NaN	1	1	Median	NaN	NaN	NaN	1	1	Median	2.8	3.6	30582000	14809000	15773000	8063700	4919500
P50106	P50106	5	5	5	DNA-directed RNA polymerase I subunit RPA14	RPA14	>sp|P50106|RPA14_YEAST DNA-directed RNA polymerase I subunit RPA14 OS=Saccharomyces cerevisiae (strain ATCC 204508 / S288c) GN=RPA14 PE=1 SV=1	1	5	5	5	5	5	5	5	5	5	22.6	22.6	22.6	14.585	137	137	0	0.80754	0.81561	59.467	8	0	Median	1.5167	1.7492	34.496	4	0	Median	0.68608	0.59373	8.2991	4	0	Median	22.6	22.6	1862400000	958320000	904110000	850960000	315010000
P50107	P50107	1	1	1	Lactoylglutathione lyase	GLO1	>sp|P50107|LGUL_YEAST Lactoylglutathione lyase OS=Saccharomyces cerevisiae (strain ATCC 204508 / S288c) GN=GLO1 PE=1 SV=1	1	1	1	1	1	1	1	1	1	1	3.7	3.7	3.7	37.208	326	326	0	0.46086	0.46621	4.7025	2	2	Median	NaN	NaN	NaN	1	1	Median	NaN	NaN	NaN	1	1	Median	3.7	3.7	17773000	11710000	6063200	8132600	5529400
P50861	P50861	1	1	1	6,7-dimethyl-8-ribityllumazine synthase	RIB4	>sp|P50861|RIB4_YEAST 6,7-dimethyl-8-ribityllumazine synthase OS=Saccharomyces cerevisiae (strain ATCC 204508 / S288c) GN=RIB4 PE=1 SV=2	1	1	1	1	1	1	1	1	1	1	7.7	7.7	7.7	18.555	169	169	0	1.4454	1.6535	61.368	3	3	Plateau	1.1098	1.2667	37.687	2	2	Median	NaN	NaN	NaN	1	1	Median	7.7	7.7	148790000	73949000	74838000	108990000	50745000
P50945	P50945	2	2	2	Altered inheritance of mitochondria protein 37, mitochondrial	AIM37	>sp|P50945|AIM37_YEAST Altered inheritance of mitochondria protein 37, mitochondrial OS=Saccharomyces cerevisiae (strain ATCC 204508 / S288c) GN=AIM37 PE=1 SV=1	1	2	2	2	1	1	1	1	1	1	7.3	7.3	7.3	26.959	234	234	0	0.84938	0.82559	11.821	2	1	Median	NaN	NaN	NaN	1	0	Median	NaN	NaN	NaN	1	1	Median	3.4	3.8	238060000	135610000	102450000	138710000	78321000
P51402	P51402	13	6	6	60S ribosomal protein L37-B	RPL37B	>sp|P51402|RL37B_YEAST 60S ribosomal protein L37-B OS=Saccharomyces cerevisiae (strain ATCC 204508 / S288c) GN=RPL37B PE=1 SV=2	1	13	6	6	13	11	6	5	6	5	69.3	42	42	9.8682	88	88	0	0.93369	0.87935	32.438	16	0	Median	0.60939	0.70323	24.519	9	0	Median	1.3385	1.0606	27.558	7	0	Median	69.3	59.1	10641000000	5075000000	5566300000	6027900000	3295000000
P51998	P51998	4	4	4	54S ribosomal protein YmL6, mitochondrial	YML6	>sp|P51998|RL4P_YEAST 54S ribosomal protein YmL6, mitochondrial OS=Saccharomyces cerevisiae (strain ATCC 204508 / S288c) GN=YML6 PE=1 SV=1	1	4	4	4	3	2	3	2	3	2	19.9	19.9	19.9	31.969	286	286	0	1.0222	0.89144	42.305	5	3	Median	1.5735	1.8185	54.539	3	2	Plateau	0.96215	0.8326	9.6572	2	1	Median	14.3	8.4	255430000	116700000	138730000	208420000	93199000
P52893	P52893	2	2	2	Probable alanine aminotransferase, mitochondrial	ALT1	>sp|P52893|ALAM_YEAST Probable alanine aminotransferase, mitochondrial OS=Saccharomyces cerevisiae (strain ATCC 204508 / S288c) GN=ALT1 PE=1 SV=1	1	2	2	2	2	1	2	1	2	1	6.4	6.4	6.4	66.421	592	592	0	1.2681	1.51	32.235	3	0	Median	1.3116	1.519	0.84854	2	0	Median	NaN	NaN	NaN	1	0	Median	6.4	2.2	50045000	24503000	25542000	36504000	17713000
P52910	P52910	12	12	12	Acetyl-coenzyme A synthetase 2	ACS2	>sp|P52910|ACS2_YEAST Acetyl-coenzyme A synthetase 2 OS=Saccharomyces cerevisiae (strain ATCC 204508 / S288c) GN=ACS2 PE=1 SV=1	1	12	12	12	11	11	11	11	11	11	18.3	18.3	18.3	75.491	683	683	0	0.91307	0.94376	56.612	26	0	Median	0.91507	1.0369	65.53	13	0	Median	0.91108	0.79668	39.94	13	0	Median	16.4	16.8	2725500000	1341400000	1384100000	1377400000	679200000
P53063	P53063	1	1	1	Decapping nuclease RAI1	RAI1	>sp|P53063|DXO_YEAST Decapping nuclease RAI1 OS=Saccharomyces cerevisiae (strain ATCC 204508 / S288c) GN=RAI1 PE=1 SV=3	1	1	1	1	1	1	1	1	1	1	2.3	2.3	2.3	44.509	387	387	0.00091827	1.1755	1.1599	11.579	2	1	Median	NaN	NaN	NaN	1	0	Median	NaN	NaN	NaN	1	1	Median	2.3	2.3	91460000	42452000	49008000	40159000	21598000
P53073	P53073	1	1	1	ER membrane protein complex subunit 4	EMC4	>sp|P53073|EMC4_YEAST ER membrane protein complex subunit 4 OS=Saccharomyces cerevisiae (strain ATCC 204508 / S288c) GN=EMC4 PE=1 SV=1	1	1	1	1	1	0	1	0	1	0	6.8	6.8	6.8	21.46	190	190	0.0074135	NaN	NaN	NaN	1	1	Median	NaN	NaN	NaN	1	1	Median	NaN	NaN	NaN	0	0	Median	6.8	0	20708000	9903400	10804000	20708000	9903400
P53076	P53076	2	2	2	Vacuolar import and degradation protein 30	VID30	>sp|P53076|VID30_YEAST Vacuolar import and degradation protein 30 OS=Saccharomyces cerevisiae (strain ATCC 204508 / S288c) GN=VID30 PE=1 SV=1	1	2	2	2	0	2	0	2	0	2	2.5	2.5	2.5	108.18	958	958	0.00088574	1.4194	1.2223	123.95	2	1	Median	NaN	NaN	NaN	0	0	Median	1.4194	1.2223	123.95	2	1	Median	0	2.5	30880000	15477000	15403000	0	0
P53081	P53081	4	4	4	NGG1-interacting factor 3	NIF3	>sp|P53081|GTPC1_YEAST Putative GTP cyclohydrolase 1 type 2 OS=Saccharomyces cerevisiae (strain ATCC 204508 / S288c) GN=NIF3 PE=1 SV=1	1	4	4	4	4	2	4	2	4	2	12.2	12.2	12.2	31.888	288	288	0	0.88952	0.98696	28.399	6	0	Median	0.88952	0.98696	20.639	4	0	Median	1.1013	0.94812	52.425	2	0	Median	12.2	5.9	132670000	74619000	58049000	91347000	51572000
P53090	P53090	7	7	7	Aromatic/aminoadipate aminotransferase 1	ARO8	>sp|P53090|ARO8_YEAST Aromatic/aminoadipate aminotransferase 1 OS=Saccharomyces cerevisiae (strain ATCC 204508 / S288c) GN=ARO8 PE=1 SV=1	1	7	7	7	7	6	7	6	7	6	17.4	17.4	17.4	56.177	500	500	0	1.0651	0.99103	17.189	12	0	Median	0.83418	0.94127	18.521	6	0	Median	1.2465	1.0489	16.282	6	0	Median	17.4	15	764130000	387850000	376280000	394290000	211900000
P53093	P53093	1	1	1	Protein YIP4	YIP4	>sp|P53093|YIP4_YEAST Protein YIP4 OS=Saccharomyces cerevisiae (strain ATCC 204508 / S288c) GN=YIP4 PE=1 SV=2	1	1	1	1	1	1	1	1	1	1	3.4	3.4	3.4	25.995	235	235	0.0058923	1.4742	1.4667	15.256	2	0	Median	NaN	NaN	NaN	1	0	Median	NaN	NaN	NaN	1	0	Median	3.4	3.4	144030000	59411000	84620000	86106000	38470000
P53095	P53095	1	1	1	D-serine dehydratase	DSD1	>sp|P53095|DSD1_YEAST D-serine dehydratase OS=Saccharomyces cerevisiae (strain ATCC 204508 / S288c) GN=DSD1 PE=1 SV=2	1	1	1	1	1	1	1	1	1	1	3	3	3	47.827	428	428	0	NaN	NaN	NaN	0	0	Median	NaN	NaN	NaN	0	0	Median	NaN	NaN	NaN	0	0	Median	3	3	47019000	0	47019000	0	0
P53111	P53111	1	1	1	NADPH-dependent aldehyde reductase ARI1	ARI1	>sp|P53111|ARI1_YEAST NADPH-dependent aldehyde reductase ARI1 OS=Saccharomyces cerevisiae (strain ATCC 204508 / S288c) GN=ARI1 PE=1 SV=1	1	1	1	1	1	1	1	1	1	1	4.3	4.3	4.3	38.083	347	347	0	0.48469	0.456	22.839	2	1	Median	NaN	NaN	NaN	1	1	Median	NaN	NaN	NaN	1	0	Median	4.3	4.3	86285000	55178000	31107000	36012000	23602000
P53115	P53115	2	2	2	Putative DNA helicase INO80	INO80	>sp|P53115|INO80_YEAST Putative DNA helicase INO80 OS=Saccharomyces cerevisiae (strain ATCC 204508 / S288c) GN=INO80 PE=1 SV=1	1	2	2	2	1	1	1	1	1	1	1.7	1.7	1.7	171.45	1489	1489	0	1.0908	1.0765	25.927	2	1	Median	NaN	NaN	NaN	1	1	Median	NaN	NaN	NaN	1	0	Median	0.9	0.9	46199000	22762000	23437000	14515000	8147200
P53131	P53131	7	7	7	Pre-mRNA-splicing factor ATP-dependent RNA helicase PRP43	PRP43	>sp|P53131|PRP43_YEAST Pre-mRNA-splicing factor ATP-dependent RNA helicase PRP43 OS=Saccharomyces cerevisiae (strain ATCC 204508 / S288c) GN=PRP43 PE=1 SV=1	1	7	7	7	6	4	6	4	6	4	9.6	9.6	9.6	87.561	767	767	0	0.87034	1.0023	46.476	7	0	Median	0.87541	1.0095	38.625	5	0	Median	0.85587	0.73206	11.93	4	2	Median	8.1	5.5	480450000	247490000	232960000	300840000	146720000
P53145	P53145	2	2	2	Large subunit GTPase 1	LSG1	>sp|P53145|LSG1_YEAST Large subunit GTPase 1 OS=Saccharomyces cerevisiae (strain ATCC 204508 / S288c) GN=LSG1 PE=1 SV=1	1	2	2	2	2	2	2	2	2	2	2.8	2.8	2.8	72.727	640	640	0	1.4185	1.3167	38.16	4	2	Median	0.83238	0.91589	46.778	2	1	Median	1.7848	1.4484	8.9254	2	1	Median	2.8	2.8	118480000	50756000	67723000	57373000	29184000
P53154	P53154	1	1	1	Glycerol uptake protein 1	GUP1	>sp|P53154|GUP1_YEAST Glycerol uptake protein 1 OS=Saccharomyces cerevisiae (strain ATCC 204508 / S288c) GN=GUP1 PE=1 SV=1	1	1	1	1	1	1	1	1	1	1	1.4	1.4	1.4	65.339	560	560	0.0017391	1.0765	1.0295	23.738	2	0	Median	NaN	NaN	NaN	1	0	Median	NaN	NaN	NaN	1	0	Median	1.4	1.4	230420000	105260000	125160000	118840000	64101000
P53155	P53155	1	1	1	Uncharacterized protein YGL082W	YGL082W	>sp|P53155|YGI2_YEAST Uncharacterized protein YGL082W OS=Saccharomyces cerevisiae (strain ATCC 204508 / S288c) GN=YGL082W PE=1 SV=1	1	1	1	1	1	1	1	1	1	1	2.6	2.6	2.6	43.321	381	381	0.0058725	0.48286	0.49372	42.908	2	2	Median	NaN	NaN	NaN	1	1	Median	NaN	NaN	NaN	1	1	Median	2.6	2.6	65244000	44022000	21222000	39025000	25882000
P53163	P53163	1	1	1	54S ribosomal protein L12, mitochondrial	MNP1	>sp|P53163|MNP1_YEAST 54S ribosomal protein L12, mitochondrial OS=Saccharomyces cerevisiae (strain ATCC 204508 / S288c) GN=MNP1 PE=1 SV=1	1	1	1	1	1	1	1	1	1	1	5.7	5.7	5.7	20.65	194	194	0	1.0649	1.0271	55.064	2	0	Median	NaN	NaN	NaN	1	0	Median	NaN	NaN	NaN	1	0	Median	5.7	5.7	91978000	46341000	45637000	40596000	26796000
P53164	P53164	2	2	2	NADH pyrophosphatase	NPY1	>sp|P53164|NPY1_YEAST NADH pyrophosphatase OS=Saccharomyces cerevisiae (strain ATCC 204508 / S288c) GN=NPY1 PE=1 SV=1	1	2	2	2	2	1	2	1	2	1	12.5	12.5	12.5	43.516	384	384	0	NaN	NaN	NaN	1	0	Median	NaN	NaN	NaN	1	0	Median	NaN	NaN	NaN	0	0	Median	12.5	3.6	6386000	2795700	3590400	6386000	2795700
P53184	P53184	1	1	1	Nicotinamidase	PNC1	>sp|P53184|PNC1_YEAST Nicotinamidase OS=Saccharomyces cerevisiae (strain ATCC 204508 / S288c) GN=PNC1 PE=1 SV=1	1	1	1	1	1	1	1	1	1	1	5.6	5.6	5.6	24.993	216	216	0.0017376	0.98018	0.97781	4.063	2	0	Median	NaN	NaN	NaN	1	0	Median	NaN	NaN	NaN	1	0	Median	5.6	5.6	203150000	102950000	100200000	98310000	51662000
P53199	P53199	3	3	3	Sterol-4-alpha-carboxylate 3-dehydrogenase, decarboxylating	ERG26	>sp|P53199|ERG26_YEAST Sterol-4-alpha-carboxylate 3-dehydrogenase, decarboxylating OS=Saccharomyces cerevisiae (strain ATCC 204508 / S288c) GN=ERG26 PE=1 SV=1	1	3	3	3	2	2	2	2	2	2	6.9	6.9	6.9	38.706	349	349	0	4.9886	4.2847	182.24	4	0	Median	3.0646	3.437	246.04	2	0	Median	5.2632	4.2847	196.49	2	0	Median	4.9	4.3	1046700000	120690000	926020000	494350000	66950000
P53200	P53200	2	2	2	N(6)-adenine-specific DNA methyltransferase-like 1	AML1	>sp|P53200|AML1_YEAST N(6)-adenine-specific DNA methyltransferase-like 1 OS=Saccharomyces cerevisiae (strain ATCC 204508 / S288c) GN=AML1 PE=1 SV=2	1	2	2	2	1	1	1	1	1	1	8.5	8.5	8.5	28.582	248	248	0	1.1836	1.2289	9.7719	2	1	Median	NaN	NaN	NaN	1	1	Median	NaN	NaN	NaN	1	0	Median	4.4	4	77243000	41254000	35989000	19673000	10511000
P53221;P05743	P53221;P05743	29;25	29;25	29;25	60S ribosomal protein L26-B;60S ribosomal protein L26-A	RPL26B;RPL26A	>sp|P53221|RL26B_YEAST 60S ribosomal protein L26-B OS=Saccharomyces cerevisiae (strain ATCC 204508 / S288c) GN=RPL26B PE=1 SV=2;>sp|P05743|RL26A_YEAST 60S ribosomal protein L26-A OS=Saccharomyces cerevisiae (strain ATCC 204508 / S288c) GN=RPL26A PE=1 SV=3	2	29	29	29	28	28	28	28	28	28	93.7	93.7	93.7	14.235	127	127;127	0	0.98253	0.98047	44.197	77	0	Median	0.77025	0.8768	41.982	41	0	Median	1.4236	1.1424	42.234	36	0	Median	93.7	89.8	73152000000	32527000000	40625000000	38212000000	20823000000
Q06144;P53224	Q06144;P53224	1;1	1;1	1;1	Protein ORM2;Protein ORM1	ORM2;ORM1	>sp|Q06144|ORM2_YEAST Protein ORM2 OS=Saccharomyces cerevisiae (strain ATCC 204508 / S288c) GN=ORM2 PE=1 SV=1;>sp|P53224|ORM1_YEAST Protein ORM1 OS=Saccharomyces cerevisiae (strain ATCC 204508 / S288c) GN=ORM1 PE=1 SV=1	2	1	1	1	1	1	1	1	1	1	4.2	4.2	4.2	24.854	216	216;222	0.0058626	1.0308	1.0354	17.532	2	0	Median	NaN	NaN	NaN	1	0	Median	NaN	NaN	NaN	1	0	Median	4.2	4.2	118150000	59339000	58814000	58798000	34029000
P53228	P53228	2	2	2	Transaldolase NQM1	NQM1	>sp|P53228|TAL2_YEAST Transaldolase NQM1 OS=Saccharomyces cerevisiae (strain ATCC 204508 / S288c) GN=NQM1 PE=1 SV=1	1	2	2	2	2	2	2	2	2	2	9	9	9	37.253	333	333	0	0.96524	0.94611	45.597	4	2	Median	0.55901	0.63658	21.452	2	1	Median	1.5867	1.3416	14.807	2	1	Median	9	9	115550000	56187000	59363000	54242000	31694000
P53235	P53235	2	2	2	Eukaryotic translation initiation factor 2A	YGR054W	>sp|P53235|EIF2A_YEAST Eukaryotic translation initiation factor 2A OS=Saccharomyces cerevisiae (strain ATCC 204508 / S288c) GN=YGR054W PE=1 SV=1	1	2	2	2	2	2	2	2	2	2	3.3	3.3	3.3	71.304	642	642	0	0.98133	0.88487	7.9048	3	0	Median	0.31872	0.36679	137.51	2	1	Median	1.032	0.85629	126.48	4	2	Median	3.3	3.3	242690000	124050000	118640000	96667000	59241000
P53252	P53252	20	20	18	Sphingolipid long chain base-responsive protein PIL1	PIL1	>sp|P53252|PIL1_YEAST Sphingolipid long chain base-responsive protein PIL1 OS=Saccharomyces cerevisiae (strain ATCC 204508 / S288c) GN=PIL1 PE=1 SV=1	1	20	20	18	19	19	19	19	17	17	52.2	52.2	45.4	38.349	339	339	0	0.98131	0.97686	39.114	41	0	Median	1.1127	1.3006	25.102	21	0	Median	0.8166	0.68978	25.71	20	0	Median	49.9	52.2	10256000000	5099000000	5156800000	5332200000	2592400000
P53261	P53261	3	3	3	Pescadillo homolog	NOP7	>sp|P53261|PESC_YEAST Pescadillo homolog OS=Saccharomyces cerevisiae (strain ATCC 204508 / S288c) GN=NOP7 PE=1 SV=1	1	3	3	3	3	2	3	2	3	2	5.6	5.6	5.6	69.876	605	605	0	1.1116	1.0831	62.47	4	4	Median	1.4458	1.571	33.248	2	2	Median	0.75251	0.64964	52.958	2	2	Median	5.6	3.6	1616500000	756920000	859610000	1066100000	526320000
P53266	P53266	1	1	1	Cytochrome oxidase assembly protein SHY1	SHY1	>sp|P53266|SHY1_YEAST Cytochrome oxidase assembly protein SHY1 OS=Saccharomyces cerevisiae (strain ATCC 204508 / S288c) GN=SHY1 PE=1 SV=1	1	1	1	1	1	1	1	1	1	1	3.6	3.6	3.6	45.055	389	389	0	0.81378	0.81108	13.771	2	1	Median	NaN	NaN	NaN	1	0	Median	NaN	NaN	NaN	1	1	Median	3.6	3.6	47785000	25287000	22499000	20247000	9910000
P53278	P53278	6	6	6	Uncharacterized protein YGR130C	YGR130C	>sp|P53278|YG3A_YEAST Uncharacterized protein YGR130C OS=Saccharomyces cerevisiae (strain ATCC 204508 / S288c) GN=YGR130C PE=1 SV=1	1	6	6	6	4	5	4	5	4	5	7.8	7.8	7.8	92.697	816	816	0	1.2466	1.1224	32.063	9	0	Median	1.0012	1.1034	31.208	4	0	Median	1.2839	1.1227	34.639	5	0	Median	6.1	6.2	281440000	134140000	147300000	105770000	50557000
P53292	P53292	11	11	11	37S ribosomal protein S35, mitochondrial	MRPS35	>sp|P53292|RT35_YEAST 37S ribosomal protein S35, mitochondrial OS=Saccharomyces cerevisiae (strain ATCC 204508 / S288c) GN=MRPS35 PE=1 SV=1	1	11	11	11	10	8	10	8	10	8	31.9	31.9	31.9	39.575	345	345	0	0.87576	0.81236	31.143	12	0	Median	0.6965	0.78945	31.44	7	0	Median	0.99262	0.85506	27.684	5	0	Median	29.6	22.6	1749100000	1003800000	745290000	1112200000	650740000
P53297	P53297	7	7	7	PAB1-binding protein 1	PBP1	>sp|P53297|PBP1_YEAST PAB1-binding protein 1 OS=Saccharomyces cerevisiae (strain ATCC 204508 / S288c) GN=PBP1 PE=1 SV=1	1	7	7	7	6	5	6	5	6	5	11.2	11.2	11.2	78.78	722	722	0	1.1952	1.0281	25.016	9	0	Median	0.76485	0.88927	24.956	5	0	Median	1.3523	1.127	28.199	4	0	Median	9.7	8.4	522890000	253900000	268980000	270760000	153030000
P53303	P53303	1	1	1	Zinc finger protein ZPR1	ZPR1	>sp|P53303|ZPR1_YEAST Zinc finger protein ZPR1 OS=Saccharomyces cerevisiae (strain ATCC 204508 / S288c) GN=ZPR1 PE=1 SV=1	1	1	1	1	1	0	1	0	1	0	2.1	2.1	2.1	55.071	486	486	0	NaN	NaN	NaN	1	0	Median	NaN	NaN	NaN	1	0	Median	NaN	NaN	NaN	0	0	Median	2.1	0	21145000	11906000	9239400	21145000	11906000
P53305	P53305	2	2	2	Mitochondrial 37S ribosomal protein S27	RSM27	>sp|P53305|RT27_YEAST Mitochondrial 37S ribosomal protein S27 OS=Saccharomyces cerevisiae (strain ATCC 204508 / S288c) GN=RSM27 PE=1 SV=1	1	2	2	2	1	2	1	2	1	2	20	20	20	12.392	110	110	0	1.04	1.021	55.213	3	1	Plateau	NaN	NaN	NaN	1	0	Median	0.99689	0.82572	77.434	2	1	Median	10.9	20	295180000	144470000	150700000	125710000	73368000
[truncated: 298 more rows]
[truncated: 16 more columns]

## Sheet: EM
Protein IDs	Majority protein IDs	Peptide counts (all)	Peptide counts (razor+unique)	Peptide counts (unique)	Protein names	Gene names	Fasta headers	Number of proteins	Peptides	Razor + unique peptides	Unique peptides	Peptides forward	Peptides reverse	Razor + unique peptides forward	Razor + unique peptides reverse	Unique peptides forward	Unique peptides reverse	Sequence coverage [%]	Unique + razor sequence coverage [%]	Unique sequence coverage [%]	Mol. weight [kDa]	Sequence length	Sequence lengths	Q-value	Ratio H/L	Ratio H/L normalized	Ratio H/L variability [%]	Ratio H/L count	Ratio H/L iso-count	Ratio H/L type	Ratio H/L forward	Ratio H/L normalized forward	Ratio H/L variability [%] forward	Ratio H/L count forward	Ratio H/L iso-count forward	Ratio H/L type forward	Ratio H/L reverse	Ratio H/L normalized reverse	Ratio H/L variability [%] reverse	Ratio H/L count reverse	Ratio H/L iso-count reverse	Ratio H/L type reverse	Sequence coverage forward [%]	Sequence coverage reverse [%]	Intensity	Intensity L	Intensity H	Intensity forward	Intensity L forward
[truncated: 1,185 more rows]
[truncated: 16 more columns]
