# Supplementary material for: m6A reader Pho92 is recruited co-transcriptionally and couples translation efficacy to mRNA decay to promote meiotic fitness in yeast
Source: bioRxiv preprint, doi:10.1101/2022.01.20.477035, version 2 (2022-04-04)
Supplement: Table S5 [file 477035_file07.xlsx]

## Sheet: m6A (miCLIP)
peak_id	baseMean	log2FoldChange	lfcSE	stat	pvalue	padj	gene_id	gene_name	category
chr01:17946-18016;+	482.832	0.228385	0.497588	0.209087	0.647484	0.735138	YAL062W	GDH3	Other
chr01:18235-18276;+	556.954	0.500003	0.40357	1.53773	0.214956	0.308902	YAL062W	GDH3	Other
chr01:18342-18391;+	512.275	0.50482	0.418915	1.45371	0.227934	0.323547	YAL062W	GDH3	Other
chr01:19217-19252;+	328.221	-0.764733	0.439697	2.9732	0.0846543	0.143949	YAL062W	GDH3	Other
chr01:19335-19356;+	335.319	-0.857012	0.445877	3.65885	0.0557722	0.101997	YAL062W	GDH3	Other
chr01:20743-20790;+	118.52	0.427989	0.365756	1.38819	0.238711	0.335939	YAL061W	BDH2	Other
chr01:22574-22611;+	143.604	0.175113	0.41378	0.178498	0.672667	0.755775	YAL060W	BDH1	Other
chr01:26061-26102;+	100.751	-0.674548	0.419515	2.63862	0.104294	0.171435	YAL056W	GPB2	Other
chr01:27769-27851;+	180.089	-1.22963	0.279105	20.6016	5.65497e-06	3.96681e-05	YAL056W	GPB2	Ime4p-dependent
chr01:27889-27943;+	133.06	-0.725733	0.333724	4.82928	0.0279802	0.057563	YAL056W	GPB2	Other
chr01:29192-29215;-	4193.83	0.313931	0.436729	0.517938	0.471723	0.579771	YAL054C	ACS1	Other
chr01:29220-29281;-	8178.24	-0.247845	0.462441	0.286715	0.592334	0.688536	YAL054C	ACS1	Other
chr01:29378-29406;-	5455.17	-0.68829	0.223339	9.43911	0.00212407	0.0066357	YAL054C	ACS1	Other
chr01:29430-29453;-	4018	-0.28387	0.250609	1.2809	0.257732	0.357267	YAL054C	ACS1	Other
chr01:31213-31244;-	4557.05	0.445469	0.334376	1.7775	0.182457	0.27163	YAL054C	ACS1	Other
chr01:31296-31322;-	4318.36	-0.683734	0.244667	7.75926	0.00534379	0.0143792	YAL054C	ACS1	Other
chr01:32330-32349;+	289.812	0.235823	0.358953	0.432528	0.510751	0.616125	YAL053W	FLC2	Other
chr01:32425-32444;+	333.207	-1.53479	0.370358	18.0759	2.12272e-05	0.000125193	YAL053W	FLC2	Ime4p-dependent
chr01:32466-32522;+	457.391	-0.744536	0.229524	10.6771	0.0010847	0.00374511	YAL053W	FLC2	Other
chr01:32588-32615;+	337.011	0.0734203	0.294109	0.0622646	0.802952	0.859474	YAL053W	FLC2	Other
chr01:32713-32750;+	311.493	-0.629922	0.327909	3.75002	0.052807	0.0974166	YAL053W	FLC2	Other
chr01:34316-34394;+	491.322	-0.0146119	0.221428	0.00433941	0.947478	0.96543	YAL053W	FLC2	Other
chr01:34505-34536;+	361.591	0.328389	0.285326	1.32211	0.250214	0.348571	YAL053W	FLC2	Other
chr01:34595-34614;+	354.599	0.987171	0.284653	12.4839	0.000410464	0.00161722	YAL053W	FLC2	Other
chr01:38067-38099;+	102.594	-1.17489	0.486291	6.56834	0.0103808	0.0254679	YAL051W	OAF1	Other
chr01:38259-38279;-	156.141	0.688807	0.315757	4.82628	0.028029	0.0576383	YAL049C	AIM2	Other
chr01:38375-38406;-	147.213	-0.138914	0.331662	0.176012	0.674823	0.757148	YAL049C	AIM2	Other
chr01:38411-38447;-	178.295	0.0162634	0.286657	0.00321703	0.954769	0.97093	YAL049C	AIM2	Other
chr01:38475-38492;-	120.516	-0.0898912	0.391521	0.0527779	0.818298	0.870531	YAL049C	AIM2	Other
chr01:44411-44454;-	354.509	0.346466	0.222064	2.4116	0.120439	0.193433	YAL044C	GCV3	Other
chr01:44462-44535;-	511.052	0.674615	0.207496	10.5318	0.00117341	0.00400202	YAL044C	GCV3	Other
chr01:44558-44582;-	173.518	0.654885	0.320904	4.10316	0.0428031	0.0820794	YAL044C	GCV3	Other
chr01:44641-44679;-	231.764	0.355042	0.404277	0.769934	0.380238	0.489384	YAL044C	GCV3	Other
chr01:45868-45894;-	81.2455	-0.583773	0.397636	2.18158	0.139671	0.21878	YAL043C	PTA1	Other
chr01:48845-48888;+	52.3652	-2.54076	0.611543	22.7876	1.80928e-06	1.46575e-05	YAL042W	ERV46	Ime4p-dependent
chr01:58141-58176;+	487.301	-0.157367	0.521012	0.0905515	0.763477	0.830341	YAL038W	CDC19	Other
chr01:58322-58389;+	847.519	0.533068	0.449149	1.40705	0.235547	0.332419	YAL038W	CDC19	Other
chr01:58399-58514;+	1176.84	0.336242	0.382966	0.770685	0.380005	0.489151	YAL038W	CDC19	Other
chr01:59244-59312;+	1005.96	0.160893	0.430271	0.139603	0.708676	0.785959	YAL038W	CDC19	Other
chr01:59360-59445;+	803.69	0.0607105	0.412069	0.0216427	0.883042	0.919391	YAL038W	CDC19	Other
chr01:59548-59592;+	576.502	0.18242	0.51554	0.12461	0.724087	0.797845	YAL038W	CDC19	Other
chr01:59597-59677;+	718.962	-0.146209	0.425527	0.117696	0.731547	0.80411	YAL038W	CDC19	Other
chr01:59720-59754;+	522.043	-0.0484551	0.438218	0.0122157	0.911993	0.939531	YAL038W	CDC19	Other
chr01:63064-63126;+	131.733	0.35131	0.360684	0.936553	0.333166	0.439131	YAL035W	FUN12	Other
chr01:63429-63475;+	116.916	0.616262	0.393537	2.40969	0.120586	0.193569	YAL035W	FUN12	Other
chr01:66628-66671;+	70.3504	-0.0973092	0.397896	0.0601346	0.806283	0.86178	YAL034W-A	MTW1	Other
chr01:66774-66814;+	121.156	1.39094	0.291579	23.7795	1.08028e-06	9.48633e-06	YAL034W-A	MTW1	Other
chr01:67663-67676;-	162.905	0.203821	0.325517	0.394141	0.530131	0.634118	YAL034C	FUN19	Other
chr01:67681-67701;-	141.603	-1.39194	0.375287	14.7555	0.000122388	0.000573616	YAL034C	FUN19	Ime4p-dependent
chr01:67744-67796;-	388.219	-0.45129	0.204417	4.88043	0.0271629	0.0561728	YAL034C	FUN19	Other
chr01:67808-67835;-	157.75	-1.40816	0.349826	17.2714	3.24022e-05	0.00018154	YAL034C	FUN19	Ime4p-dependent
chr01:71730-71783;-	96.9989	0.18399	0.414943	0.194394	0.659284	0.744982	YAL031C	GIP4	Other
chr01:72594-72650;-	108.606	-0.586227	0.401733	2.24339	0.134187	0.211863	YAL031C	GIP4	Other
chr01:73903-73926;+	125.174	1.1793	0.341957	11.7028	0.000624061	0.00232776	YAL030W	SNC1	Other
chr01:73990-74016;+	81.866	0.684033	0.417913	2.58999	0.107541	0.176042	YAL030W	SNC1	Other
chr01:76311-76363;-	81.435	-1.83852	0.527887	14.704	0.00012578	0.00058605	YAL029C	MYO4	Ime4p-dependent
chr01:81909-81965;-	89.5939	-0.461659	0.496599	0.889248	0.345681	0.451811	YAL026C	DRS2	Other
chr01:92659-92699;-	192.413	-1.09979	0.315169	12.7419	0.000357547	0.00143607	YAL023C	PMT2	Other
chr01:92715-92735;-	153.194	-0.426269	0.406336	1.10455	0.293269	0.397102	YAL023C	PMT2	Other
chr01:92753-92792;-	179.725	-0.172334	0.335728	0.263015	0.608057	0.702012	YAL023C	PMT2	Other
chr01:93248-93274;-	179.458	-0.966418	0.355368	7.61615	0.00578479	0.01539	YAL023C	PMT2	Other
chr01:93724-93758;-	195.395	0.836767	0.336805	6.43287	0.0112027	0.0271156	YAL023C	PMT2	Other
chr01:93818-93852;-	162.498	-0.0316467	0.375098	0.00711557	0.932775	0.954843	YAL023C	PMT2	Other
chr01:97136-97182;-	129.711	0.0798259	0.336988	0.0561829	0.812634	0.866233	YAL021C	CCR4	Other
chr01:97215-97264;-	115.004	-0.0305578	0.357028	0.00733324	0.931757	0.954006	YAL021C	CCR4	Other
chr01:98685-98732;-	96.4978	-0.242158	0.417609	0.338246	0.560843	0.661764	YAL021C	CCR4	Other
chr01:98807-98829;-	78.3909	-1.85975	0.621132	10.978	0.000922012	0.00326027	YAL021C	CCR4	Other
chr01:104908-105013;-	397.933	5.38659	1.37271	14.0031	0.000182514	0.000808069	YAL018C	YAL018C	Other
chr01:105025-105039;-	180.268	5.24777	1.04579	22.6549	1.93867e-06	1.556e-05	YAL018C	YAL018C	Other
chr01:105071-105085;-	171.317	4.28606	1.18677	10.6198	0.00111882	0.00384184	YAL018C	YAL018C	Other
chr01:105159-105277;-	402.765	4.63897	1.9478	5.28443	0.021517	0.0465788	YAL018C	YAL018C	Other
chr01:105888-105917;-	188.237	3.26555	1.44868	4.46836	0.0345281	0.068512	YAL018C	YAL018C	Other
chr01:110589-110603;+	182.181	0.765001	0.340673	5.23533	0.0221326	0.0477191	YAL017W	PSK1	Other
chr01:110631-110699;+	275.849	-1.47273	0.436213	11.4226	0.000725557	0.00264721	YAL017W	PSK1	Other
chr01:110705-110770;+	242.092	-1.79758	0.294538	41.279	1.31982e-10	3.15662e-09	YAL017W	PSK1	Ime4p-dependent
chr01:112311-112341;+	234.484	0.515728	0.260236	3.92895	0.0474615	0.0894449	YAL016W	TPD3	Other
chr01:112390-112422;+	471.134	0.714899	0.175048	16.7878	4.18009e-05	0.000225465	YAL016W	TPD3	Other
chr01:112437-112466;+	247.62	1.18272	0.258884	21.7172	3.15939e-06	2.38874e-05	YAL016W	TPD3	Other
chr01:113028-113123;+	425.25	-0.460043	0.178734	6.74476	0.00940233	0.0233622	YAL016W	TPD3	Other
chr01:115890-115986;+	362.953	1.11177	0.369544	9.11011	0.002542	0.0077283	YAL013W	DEP1	Other
chr01:116036-116126;+	256.538	1.05401	0.325816	10.5527	0.00116019	0.00396405	YAL013W	DEP1	Other
chr01:116380-116409;+	101.104	0.298469	0.35302	0.714114	0.398081	0.507546	YAL013W	DEP1	Other
chr01:116412-116429;+	62.309	-1.66679	0.530124	11.6888	0.000628781	0.00234169	YAL013W	DEP1	Other
chr01:116559-116589;+	92.5709	1.03541	0.368002	8.15197	0.00430144	0.0119934	YAL013W	DEP1	Other
chr01:116804-116834;+	77.0621	-0.732019	0.401457	3.45681	0.0629917	0.112856	YAL013W	DEP1	Other
chr01:122538-122578;+	59.4005	-2.77803	0.629767	30.118	4.06535e-08	5.40991e-07	YAL009W	SPO7	Ime4p-dependent
chr01:123277-123335;+	91.7493	0.0451835	0.399279	0.0127866	0.909969	0.937953	YAL008W	FUN14	Other
chr01:123646-123683;+	103.9	0.410758	0.358176	1.30235	0.253784	0.352315	YAL008W	FUN14	Other
chr01:124038-124118;-	127.592	-0.667964	0.286065	5.51068	0.0189007	0.0417826	YAL007C	ERP2	Other
chr01:125755-125854;-	1058.58	-0.7644	0.159438	23.0136	1.60855e-06	1.33146e-05	YAL005C	SSA1	Other
chr01:126249-126302;-	728.943	1.06245	0.177314	37.2553	1.03634e-09	2.06812e-08	YAL005C	SSA1	Other
chr01:126340-126359;-	387.809	0.830224	0.263962	10.3088	0.00132399	0.00443614	YAL005C	SSA1	Other
chr01:128979-129016;+	173.261	0.131496	0.874311	0.0225553	0.880619	0.917537	YAL003W	EFB1	Other
chr01:129140-129161;+	161.63	0.73459	0.369293	3.94123	0.0471162	0.0888469	YAL003W	EFB1	Other
chr01:129599-129633;+	183.946	-0.534118	0.340743	2.54046	0.110962	0.180679	YAL003W	EFB1	Other
chr01:129642-129672;+	173.177	-0.699009	0.377187	3.61553	0.0572424	0.104007	YAL003W	EFB1	Other
chr01:135200-135239;-	99.2985	-0.196639	0.446408	0.195107	0.6587	0.74451	YAL001C	TFC3	Other
chr01:137257-137319;-	115.132	-1.44323	0.4254	13.1186	0.000292373	0.00121162	YAL001C	TFC3	Other
chr01:139677-139728;+	57.8727	0.228224	0.468001	0.233983	0.628586	0.719258	YAR002W	NUP60	Other
chr01:140484-140519;-	152.775	0.101996	0.319641	0.101953	0.749498	0.818925	YAR002C-A	ERP1	Other
chr01:140600-140681;-	275.799	0.155337	0.230882	0.452718	0.501047	0.606957	YAR002C-A	ERP1	Other
chr01:140905-140925;-	138.173	-0.242823	0.352819	0.475088	0.490656	0.596726	YAR002C-A	ERP1	Other
chr01:140995-141025;-	150.643	0.100222	0.318673	0.0990523	0.75297	0.821775	YAR002C-A	ERP1	Other
chr01:143170-143183;-	279.394	0.775269	0.294326	6.88426	0.00869583	0.0218867	YAR007C	RFA1	Other
chr01:143196-143218;-	294.952	0.280821	0.283328	0.973093	0.32391	0.428951	YAR007C	RFA1	Other
chr01:143245-143303;-	520.235	0.128093	0.194593	0.431087	0.511456	0.616819	YAR007C	RFA1	Other
chr01:143538-143597;-	384.856	0.435303	0.210115	4.25257	0.039191	0.076119	YAR007C	RFA1	Other
chr01:143981-144026;-	397.26	0.858731	0.208055	16.9697	3.79809e-05	0.000207701	YAR007C	RFA1	Other
chr01:144053-144071;-	245.476	-0.0259709	0.381009	0.00464676	0.945653	0.964086	YAR007C	RFA1	Other
chr01:144125-144195;-	426.39	0.167815	0.197966	0.715556	0.397605	0.507143	YAR007C	RFA1	Other
chr01:144355-144414;-	388.346	-1.1609	0.249138	23.9214	1.00351e-06	8.87767e-06	YAR007C	RFA1	Ime4p-dependent
chr01:144567-144592;-	310.848	-0.34476	0.275186	1.60102	0.205759	0.29857	YAR007C	RFA1	Other
chr01:145508-145545;+	165.521	0.414971	0.275786	2.26819	0.132054	0.208912	YAR008W	YAR008W	Other
chr01:145874-145902;+	121.996	-0.928327	0.342804	7.71197	0.00548557	0.0147008	YAR008W	YAR008W	Other
chr01:145930-145957;+	205.329	-1.59575	0.285606	34.4708	4.32692e-09	7.22595e-08	YAR008W	YAR008W	Ime4p-dependent
chr01:147085-147147;-	134.874	-1.68765	0.342103	26.5814	2.52671e-07	2.62002e-06	YAR014C	BUD14	Ime4p-dependent
chr01:147548-147624;-	301.289	-1.73176	0.204606	77.1424	1.59063e-18	1.47002e-16	YAR014C	BUD14	Ime4p-dependent
chr01:149739-149809;+	146.605	0.119918	0.33787	0.125288	0.723368	0.797391	YAR015W	ADE1	Other
chr01:149834-149855;+	67.9529	-0.79861	0.630467	1.75027	0.185842	0.275293	YAR015W	ADE1	Other
chr01:150235-150276;+	171.981	0.641403	0.283912	5.02128	0.0250376	0.0525426	YAR015W	ADE1	Other
chr01:153959-154016;-	63.9483	-0.769085	0.598635	1.77812	0.18238	0.271559	YAR019C	CDC15	Other
chr01:176145-176188;+	432.312	-0.236552	0.406426	0.33728	0.561403	0.662041	YAR035W	YAT1	Other
chr01:176280-176312;+	281.615	0.107175	0.470641	0.0518536	0.819869	0.871895	YAR035W	YAT1	Other
chr01:176460-176484;+	327.539	0.700158	0.703807	0.990319	0.319664	0.424569	YAR035W	YAT1	Other
chr01:176537-176575;+	368.051	0.794212	0.449535	3.13524	0.0766172	0.132748	YAR035W	YAT1	Other
chr01:177177-177199;+	249.069	-0.271359	0.549519	0.24185	0.622873	0.714783	YAR035W	YAT1	Other
chr01:177231-177257;+	273.261	-0.168874	0.471939	0.127393	0.721151	0.795992	YAR035W	YAT1	Other
chr01:177499-177526;+	298.214	-0.215013	0.447193	0.231021	0.630768	0.72113	YAR035W	YAT1	Other
chr01:178221-178256;+	315.054	0.590057	0.46502	1.6164	0.203594	0.296226	YAR035W	YAT1	Other
chr01:179083-179111;+	98.8982	-0.61247	0.502019	1.53366	0.215564	0.309682	YAR042W	SWH1	Other
chr01:181636-181667;+	135.792	-0.045763	0.361308	0.0160153	0.899295	0.929821	YAR042W	SWH1	Other
chr01:182066-182100;+	120.05	0.19044	0.397446	0.229097	0.632195	0.722432	YAR042W	SWH1	Other
chr02:9566-9588;-	69.8449	-0.490135	0.442653	1.28558	0.256865	0.356169	YBL107C	YBL107C	Other
chr02:9661-9707;-	135.786	1.5126	0.277557	30.0612	4.18618e-08	5.53448e-07	YBL107C	YBL107C	Other
chr02:9773-9802;-	106.246	0.521388	0.312532	2.72407	0.0988455	0.163864	YBL107C	YBL107C	Other
chr02:13901-13968;-	167.468	0.470563	0.336141	1.94797	0.162806	0.247287	YBL105C	PKC1	Other
chr02:22553-22573;-	122.018	-0.210783	0.335222	0.401433	0.52635	0.630944	YBL103C	RTG3	Other
chr02:22636-22662;-	89.5739	-0.0866418	0.424506	0.0419099	0.837792	0.885023	YBL103C	RTG3	Other
chr02:23871-23889;+	118.399	0.133389	0.452334	0.0862552	0.768993	0.834003	YBL102W	SFT2	Other
chr02:23924-23948;+	134.839	-0.336063	0.408912	0.689749	0.40625	0.515887	YBL102W	SFT2	Other
chr02:24067-24122;+	242.885	0.0454929	0.264585	0.0295167	0.863591	0.905444	YBL102W	SFT2	Other
chr02:24178-24213;+	237.096	1.03708	0.261831	15.7191	7.34774e-05	0.000369483	YBL102W	SFT2	Other
chr02:24604-24624;-	106.906	-1.12202	0.525978	5.04398	0.0247117	0.0520537	YBL101C	ECM21	Other
chr02:27039-27053;-	112.32	-1.29865	0.518364	7.15819	0.00746226	0.0192138	YBL101C	ECM21	Other
chr02:29937-29959;+	916.185	0.548334	0.417345	1.72542	0.188996	0.27906	YBL099W	ATP1	Other
chr02:30106-30141;+	1228.71	0.251932	0.260989	0.930739	0.334671	0.440505	YBL099W	ATP1	Other
chr02:30171-30188;+	855.094	-0.259597	0.309233	0.708065	0.400087	0.509421	YBL099W	ATP1	Other
chr02:30194-30237;+	1264.46	0.544333	0.295917	3.3807	0.065964	0.117126	YBL099W	ATP1	Other
chr02:30240-30294;+	1559.09	0.632196	0.288859	4.79232	0.0285869	0.0585454	YBL099W	ATP1	Other
chr02:30372-30398;+	1064	0.915543	0.290719	9.94392	0.00161382	0.00524299	YBL099W	ATP1	Other
chr02:31671-31705;+	1044.37	1.37538	0.264884	27.055	1.97752e-07	2.13666e-06	YBL099W	ATP1	Other
chr02:31958-31978;+	969.954	0.424443	0.304495	1.93683	0.164013	0.248843	YBL099W	ATP1	Other
chr02:32459-32493;+	112.311	-0.272897	0.450264	0.376038	0.539731	0.642454	YBL098W	BNA4	Other
chr02:32581-32596;+	122.617	1.1723	0.366766	9.99187	0.00157233	0.00512919	YBL098W	BNA4	Other
chr02:32635-32713;+	171.429	0.773414	0.287152	7.07383	0.0078218	0.0200081	YBL098W	BNA4	Other
chr02:32876-32910;+	134.684	-0.387765	0.383784	1.05479	0.304407	0.408811	YBL098W	BNA4	Other
chr02:32913-32927;+	101.758	0.52816	0.448616	1.34775	0.245672	0.34335	YBL098W	BNA4	Other
chr02:33139-33161;+	114.321	0.145705	0.409166	0.125579	0.723061	0.797371	YBL098W	BNA4	Other
chr02:33377-33417;+	99.5388	-2.62724	0.869501	15.1098	0.000101437	0.00048693	YBL098W	BNA4	Ime4p-dependent
chr02:36494-36526;+	106.187	0.764059	0.34902	4.85673	0.0275385	0.0568262	YBL095W	YBL095W	Other
chr02:37503-37560;-	110.931	0.718202	0.331882	4.57679	0.0324078	0.0651235	YBL093C	ROX3	Other
chr02:39702-39743;-	58.5805	0.391092	0.441756	0.761907	0.382732	0.49173	YBL091C-A	SCS22	Other
chr02:40718-40766;-	118.672	-1.05862	0.369339	8.96916	0.00274575	0.00823724	YBL091C	MAP2	Other
chr02:41096-41127;-	108.406	-0.963449	0.372169	7.25534	0.00706903	0.0183322	YBL091C	MAP2	Other
chr02:41501-41534;-	153.235	0.740318	0.277447	7.13726	0.00754984	0.0194025	YBL091C	MAP2	Other
chr02:41552-41579;-	101.989	-0.523079	0.372215	2.04012	0.153198	0.236156	YBL091C	MAP2	Other
chr02:41609-41666;-	194.364	-0.257199	0.241793	1.14355	0.284904	0.388094	YBL091C	MAP2	Other
chr02:41735-41760;-	128.358	1.22971	0.315249	15.7776	7.12397e-05	0.000359751	YBL091C	MAP2	Other
chr02:54414-54467;-	222.978	-1.95896	0.292978	46.9274	7.36653e-12	2.2475e-10	YBL086C	YBL086C	Ime4p-dependent
chr02:54476-54521;-	203.825	-2.22843	0.281896	69.4798	7.71995e-17	5.78631e-15	YBL086C	YBL086C	Ime4p-dependent
chr02:57397-57487;+	180.889	1.06774	0.343616	9.41607	0.00215092	0.0067041	YBL085W	BOI1	Other
chr02:59657-59688;+	157.005	-0.202261	0.394635	0.268148	0.604576	0.699437	YBL085W	BOI1	Other
chr02:59748-59765;+	113.625	-0.903265	0.708852	1.85596	0.173092	0.260208	YBL085W	BOI1	Other
chr02:59782-59813;+	150.194	-0.00328731	0.39909	6.78946e-05	0.993426	0.996042	YBL085W	BOI1	Other
chr02:59827-59842;+	119.56	-0.412228	0.581128	0.529929	0.466637	0.574856	YBL085W	BOI1	Other
chr02:59893-59928;+	144.579	1.20495	0.37362	9.87153	0.00167856	0.00542001	YBL085W	BOI1	Other
chr02:61588-61617;-	187.881	-1.31257	0.338215	17.0176	3.70344e-05	0.000203657	YBL084C	CDC27	Ime4p-dependent
chr02:61706-61787;-	254.214	0.570766	0.238497	5.70523	0.0169145	0.0380455	YBL084C	CDC27	Other
chr02:72718-72738;+	94.909	-1.73972	0.450901	16.8817	3.97839e-05	0.000216155	YBL079W	NUP170	Ime4p-dependent
chr02:72743-72757;+	74.4779	-3.67096	0.883466	31.5065	1.98776e-08	2.85823e-07	YBL079W	NUP170	Ime4p-dependent
chr02:72775-72797;+	88.7036	-3.13905	0.646561	36.0008	1.9724e-09	3.62456e-08	YBL079W	NUP170	Ime4p-dependent
chr02:72811-72841;+	77.0412	-1.09774	0.50045	5.09201	0.0240363	0.0508787	YBL079W	NUP170	Other
chr02:73217-73233;-	1293.6	0.793447	0.178858	19.6216	9.43956e-06	6.15868e-05	YBL078C	ATG8	Other
chr02:73350-73380;-	1972.11	0.365814	0.168008	4.74926	0.029311	0.0597582	YBL078C	ATG8	Other
chr02:73415-73515;-	4128.65	-0.845076	0.143406	34.5936	4.06243e-09	6.85643e-08	YBL078C	ATG8	Other
chr02:73824-73861;-	1960.07	0.916869	0.28164	10.6271	0.00111439	0.00383096	YBL078C	ATG8	Other
chr02:74242-74273;-	77.2336	-1.78713	0.574181	11.9971	0.000532838	0.00203862	YBL076C	ILS1	Other
chr02:74286-74326;-	112.748	-1.741	0.415577	21.1731	4.19616e-06	3.05844e-05	YBL076C	ILS1	Ime4p-dependent
chr02:77751-77765;-	1138.14	0.302671	0.302909	0.99984	0.317349	0.422337	YBL075C	SSA3	Other
chr02:78009-78023;-	677.932	0.787712	0.272955	8.39623	0.00376	0.0107532	YBL075C	SSA3	Other
chr02:78404-78433;-	747.294	0.389822	0.234946	2.75909	0.0967033	0.161014	YBL075C	SSA3	Other
chr02:82157-82199;-	117.747	0.648192	0.323409	4.1063	0.0427238	0.0819605	YBL072C	RPS8A	Other
chr02:86524-86551;+	105.991	-1.00097	0.372556	7.76372	0.00533059	0.0143541	YBL068W	PRS4	Other
chr02:89992-90038;-	90.3308	-0.061589	0.484511	0.0161055	0.899014	0.929681	YBL066C	SEF1	Other
chr02:90178-90221;-	123.999	-0.143524	0.621713	0.0527696	0.818312	0.870531	YBL066C	SEF1	Other
chr02:93565-93582;-	605.911	0.188454	0.246843	0.581397	0.445765	0.554799	YBL064C	PRX1	Other
chr02:94073-94088;-	751.71	0.568452	0.232205	5.98402	0.014436	0.0334755	YBL064C	PRX1	Other
chr02:94229-94321;-	2073.8	-0.314671	0.198275	2.51177	0.112999	0.183493	YBL064C	PRX1	Other
chr02:97847-97882;+	155.942	-0.362549	0.423387	0.749907	0.386506	0.495976	YBL063W	KIP1	Other
chr02:97888-97923;+	145.767	-2.19564	0.641131	16.3454	5.27844e-05	0.000277293	YBL063W	KIP1	Ime4p-dependent
chr02:98099-98136;+	186.886	0.461697	0.335258	1.87159	0.171293	0.257833	YBL063W	KIP1	Other
chr02:98219-98299;+	316.665	1.50159	0.31021	23.7317	1.10744e-06	9.7069e-06	YBL063W	KIP1	Other
chr02:98804-98844;-	114.901	-1.57748	0.345111	22.5034	2.09769e-06	1.67235e-05	YBL061C	SKT5	Ime4p-dependent
chr02:103295-103339;-	108.721	0.757785	0.304035	5.94992	0.014718	0.0340132	YBL059C-A	CMC2	Other
chr02:103368-103430;-	126.619	-0.0561907	0.2975	0.0358511	0.849823	0.893963	YBL059C-A	CMC2	Other
chr02:104796-104813;+	137.267	0.41783	0.342966	1.46234	0.226559	0.32193	YBL058W	SHP1	Other
chr02:104822-104841;+	132.991	1.44315	0.361068	16.4705	4.94123e-05	0.000261891	YBL058W	SHP1	Other
chr02:104936-104967;+	155.454	1.10645	0.303505	13.357	0.000257457	0.00108535	YBL058W	SHP1	Other
chr02:105061-105076;+	140.039	1.33122	0.339778	15.6692	7.54425e-05	0.000378565	YBL058W	SHP1	Other
chr02:105411-105459;+	200.953	0.642471	0.254664	6.29321	0.0121201	0.0289426	YBL058W	SHP1	Other
chr02:105567-105596;+	128.521	-0.300924	0.376848	0.650619	0.419892	0.528977	YBL058W	SHP1	Other
chr02:105730-105775;+	222.431	-0.0727821	0.246983	0.0869447	0.768098	0.833222	YBL058W	SHP1	Other
chr02:105780-105796;+	96.0866	-1.84282	0.701455	9.06074	0.00261156	0.00790946	YBL058W	SHP1	Other
chr02:107055-107080;+	220.553	1.56122	0.296118	26.3456	2.85462e-07	2.91557e-06	YBL056W	PTC3	Other
chr02:107118-107160;+	171.025	0.0465899	0.504107	0.00848973	0.926587	0.950931	YBL056W	PTC3	Other
chr02:107374-107407;+	203.304	0.879874	0.339	6.32944	0.011875	0.0284086	YBL056W	PTC3	Other
chr02:108009-108029;+	191.818	0.40364	0.390349	1.0282	0.310581	0.415111	YBL056W	PTC3	Other
chr02:108193-108245;+	261.81	0.984207	0.260472	13.4909	0.000239725	0.00101918	YBL056W	PTC3	Other
chr02:108336-108376;+	211.716	-0.968214	0.439268	5.61219	0.017836	0.0398452	YBL056W	PTC3	Other
chr02:108558-108605;+	210.526	1.39325	0.324894	17.2499	3.27717e-05	0.000183072	YBL056W	PTC3	Other
chr02:111755-111797;+	155.875	0.178293	0.307135	0.335335	0.562534	0.663129	YBL054W	TOD6	Other
chr02:111821-111869;+	164.588	-1.94429	0.399661	26.565	2.54825e-07	2.63948e-06	YBL054W	TOD6	Ime4p-dependent
chr02:112017-112033;+	98.0897	1.11143	0.396572	7.91705	0.0048971	0.0133569	YBL054W	TOD6	Other
chr02:112589-112601;-	44.4769	-4.42711	1.219	25.178	5.22751e-07	5.02633e-06	YBL052C	SAS3	Ime4p-dependent
chr02:112617-112648;-	103.528	-0.760427	0.339604	5.18491	0.0227838	0.0488577	YBL052C	SAS3	Other
chr02:112654-112676;-	83.9096	-1.00176	0.389182	6.99837	0.00815842	0.0206928	YBL052C	SAS3	Other
chr02:116494-116525;-	96.5549	-0.680136	0.407762	2.83032	0.0924999	0.155019	YBL051C	PIN4	Other
chr02:116539-116563;-	75.8799	-1.66483	0.526197	11.1616	0.000835082	0.00299505	YBL051C	PIN4	Other
chr02:118666-118686;+	222.247	1.75376	0.25809	47.9377	4.39988e-12	1.40545e-10	YBL050W	SEC17	Other
chr02:118806-118846;+	161.402	0.628744	0.316418	3.87926	0.0488861	0.0914597	YBL050W	SEC17	Other
chr02:118884-118908;+	131.97	0.00407046	0.365876	0.000123807	0.991122	0.99457	YBL050W	SEC17	Other
chr02:119143-119160;+	126.859	-0.119684	0.384413	0.0976196	0.754705	0.823291	YBL050W	SEC17	Other
chr02:119169-119203;+	192.946	0.238131	0.285239	0.692581	0.405288	0.515078	YBL050W	SEC17	Other
chr02:119856-119881;+	344.543	1.36159	0.26873	26.4908	2.648e-07	2.73091e-06	YBL049W	MOH1	Other
chr02:119944-120011;+	606.002	0.577338	0.190959	9.13933	0.00250172	0.00762289	YBL049W	MOH1	Other
chr02:120110-120135;+	347.151	0.84598	0.252722	11.2902	0.000779186	0.00282437	YBL049W	MOH1	Other
chr02:120146-120162;+	290.336	0.807154	0.329086	6.09476	0.0135583	0.0318043	YBL049W	MOH1	Other
chr02:120165-120178;+	245.732	-0.104031	0.729209	0.0201466	0.887128	0.921489	YBL049W	MOH1	Other
chr02:120830-120890;-	157.166	-2.84831	0.432754	59.9509	9.72515e-15	4.89808e-13	YBL047C	EDE1	Ime4p-dependent
chr02:121365-121409;-	156.022	-0.682957	0.333491	4.23163	0.0396774	0.0768912	YBL047C	EDE1	Other
chr02:121417-121444;-	130.359	-1.30277	0.431712	9.65729	0.00188602	0.00598234	YBL047C	EDE1	Other
chr02:122485-122520;-	177.376	-1.42494	0.317055	21.5369	3.47086e-06	2.59333e-05	YBL047C	EDE1	Ime4p-dependent
chr02:126173-126224;+	219.57	0.773772	0.23576	11.1637	0.000834141	0.00299291	YBL046W	PSY4	Other
chr02:126227-126255;+	127.829	0.297597	0.309847	0.930091	0.334839	0.440666	YBL046W	PSY4	Other
chr02:127151-127192;-	861.519	0.918378	0.191488	22.9908	1.62777e-06	1.34169e-05	YBL045C	COR1	Other
chr02:127299-127338;-	840.3	0.378109	0.194359	3.77036	0.0521683	0.096594	YBL045C	COR1	Other
chr02:127345-127383;-	892.525	0.0762098	0.187185	0.165859	0.683819	0.764627	YBL045C	COR1	Other
chr02:127388-127435;-	1092.09	-0.00695614	0.15727	0.00195819	0.964704	0.977853	YBL045C	COR1	Other
chr02:127523-127543;-	672.798	0.448863	0.213967	4.36183	0.0367528	0.0722831	YBL045C	COR1	Other
chr02:127772-127802;-	721.752	0.789748	0.209565	14.1081	0.000172602	0.000771362	YBL045C	COR1	Other
chr02:128150-128165;-	579.37	0.763012	0.240425	9.90208	0.00165092	0.00534164	YBL045C	COR1	Other
chr02:128315-128376;-	1105.53	-0.0294989	0.225288	0.0172028	0.895649	0.927283	YBL045C	COR1	Other
chr02:128397-128438;-	785.992	0.480753	0.199183	5.76688	0.016331	0.0369866	YBL045C	COR1	Other
chr02:128719-128743;-	619.056	-0.62615	0.247068	6.72936	0.00948384	0.0235341	YBL045C	COR1	Other
chr02:128750-128777;-	757.259	-0.264345	0.299523	0.773775	0.379052	0.488271	YBL045C	COR1	Other
chr02:129766-129849;+	131.715	0.168949	0.321987	0.270497	0.602998	0.697906	YBL043W	ECM13	Other
chr02:130012-130070;+	141.367	0.793855	0.291474	7.06324	0.00786816	0.0200953	YBL043W	ECM13	Other
chr02:130298-130330;+	84.106	-0.915595	0.52779	3.45343	0.0631205	0.113004	YBL043W	ECM13	Other
chr02:133057-133114;-	65.7711	-1.37774	0.675369	4.91206	0.0266699	0.055394	YBL042C	FUI1	Other
chr02:134735-134761;+	189.464	-0.362249	0.35717	1.0635	0.302417	0.406885	YBL041W	PRE7	Other
chr02:134789-134830;+	204.799	-1.56188	0.429909	16.3202	5.34912e-05	0.000280387	YBL041W	PRE7	Ime4p-dependent
chr02:134852-134921;+	432.84	-0.588647	0.230953	6.68488	0.00972341	0.0240346	YBL041W	PRE7	Other
chr02:134989-135007;+	237.518	-0.0109172	0.279707	0.00152601	0.968839	0.980475	YBL041W	PRE7	Other
chr02:135023-135047;+	210.046	-0.738176	0.350316	4.7963	0.0285209	0.0584604	YBL041W	PRE7	Other
chr02:135055-135068;+	224.789	0.550219	0.275233	3.89336	0.0484775	0.0908738	YBL041W	PRE7	Other
chr02:135258-135278;-	206.916	-2.14037	0.31464	58.2891	2.26297e-14	1.06115e-12	YBL040C	ERD2	Ime4p-dependent
chr02:135296-135375;-	335.86	-2.3086	0.24776	109.121	1.52644e-25	4.40308e-23	YBL040C	ERD2	Ime4p-dependent
chr02:139938-139981;+	102.028	-0.258001	0.345822	0.563706	0.452771	0.561261	YBL038W	MRPL16	Other
chr02:143108-143154;+	73.7835	-0.512233	0.4935	1.11391	0.291233	0.394907	YBL037W	APL3	Other
chr02:145288-145330;-	77.8699	0.138664	0.405987	0.116737	0.732601	0.804712	YBL035C	POL12	Other
chr02:146913-146935;-	221.327	0.682865	0.33776	4.10705	0.0427048	0.0819404	YBL034C	STU1	Other
chr02:147302-147318;-	176.633	-1.13434	0.506359	5.50117	0.0190037	0.0419706	YBL034C	STU1	Other
chr02:147341-147384;-	214.153	-1.01218	0.371306	7.94202	0.00482998	0.0132117	YBL034C	STU1	Other
chr02:147948-148005;-	304.268	1.20436	0.270134	20.3406	6.48097e-06	4.4479e-05	YBL034C	STU1	Other
chr02:148053-148097;-	263.315	0.966919	0.296817	10.746	0.00104505	0.00362397	YBL034C	STU1	Other
chr02:151793-151818;-	132.942	-0.497987	0.353668	2.03616	0.153597	0.236651	YBL033C	RIB1	Other
chr02:151821-151865;-	198.044	-0.473152	0.289073	2.71742	0.0992585	0.164463	YBL033C	RIB1	Other
chr02:151869-151884;-	165.115	0.373079	0.292102	1.62359	0.202592	0.294964	YBL033C	RIB1	Other
chr02:152001-152045;-	130.79	-0.386631	0.360983	1.16574	0.280279	0.38311	YBL033C	RIB1	Other
chr02:152464-152539;-	219.727	0.28964	0.294812	0.959434	0.32733	0.432577	YBL033C	RIB1	Other
chr02:153671-153710;+	127.034	0.131356	0.317797	0.17027	0.679872	0.761019	YBL032W	HEK2	Other
chr02:153928-153969;+	112.83	0.0681081	0.349856	0.0378148	0.845816	0.890999	YBL032W	HEK2	Other
chr02:154393-154422;+	90.6483	-1.83076	0.534765	14.7326	0.000123888	0.000578934	YBL032W	HEK2	Ime4p-dependent
chr02:155937-155970;-	498.751	0.635524	0.404447	2.45627	0.117056	0.189146	YBL030C	PET9	Other
chr02:156012-156059;-	559.74	0.615555	0.251409	5.91113	0.0150455	0.0346524	YBL030C	PET9	Other
chr02:156067-156130;-	692.794	0.762801	0.302228	6.3626	0.0116551	0.0280163	YBL030C	PET9	Other
chr02:156241-156259;-	423.912	1.25689	0.350409	12.5264	0.000401244	0.00158615	YBL030C	PET9	Other
chr02:156639-156686;-	593.803	1.40295	0.322315	18.8841	1.38903e-05	8.60188e-05	YBL030C	PET9	Other
chr02:156923-156941;-	450.023	1.13797	0.301883	13.9642	0.000186329	0.000819624	YBL030C	PET9	Other
chr02:157064-157151;-	920.133	1.00221	0.284237	12.4033	0.000428573	0.00168369	YBL030C	PET9	Other
chr02:157171-157188;-	444.617	1.30412	0.299295	18.4855	1.71203e-05	0.000103275	YBL030C	PET9	Other
chr02:157564-157637;-	298.592	0.901674	0.223417	16.0453	6.18462e-05	0.00031788	YBL029C-A	YBL029C-A	Other
chr02:157853-157894;-	147.483	1.12936	0.303045	13.5999	0.000226193	0.000968135	YBL029C-A	YBL029C-A	Other
chr02:159566-159605;+	76.5172	0.372737	0.425776	0.748491	0.386954	0.496351	YBL029W	YBL029W	Other
chr02:160198-160232;+	78.9231	-0.101317	0.450678	0.0510189	0.8213	0.872831	YBL029W	YBL029W	Other
chr02:160269-160300;+	113.89	1.19869	0.323091	13.3425	0.000259458	0.00109282	YBL029W	YBL029W	Other
chr02:160304-160340;+	76.1497	0.221721	0.451165	0.237033	0.626357	0.717311	YBL029W	YBL029W	Other
chr02:160371-160391;+	70.449	0.270236	0.481438	0.307678	0.579109	0.676966	YBL029W	YBL029W	Other
chr02:162397-162423;+	248.852	-2.6309	0.303974	87.3652	9.02232e-21	1.20963e-18	YBL027W	RPL19B	Ime4p-dependent
chr02:162429-162477;+	336.997	-2.73781	0.262557	126.494	2.39678e-29	1.03704e-26	YBL027W	RPL19B	Ime4p-dependent
chr02:162622-162664;-	115.21	-0.713824	0.295923	5.85003	0.0155768	0.0355748	Unit790	Unit790	Other
chr02:162746-162778;-	118.042	0.189819	0.30096	0.400846	0.526652	0.630989	Unit790	Unit790	Other
chr02:163894-163937;+	68.1627	0.483153	0.427045	1.25037	0.263483	0.363755	YBL026W	LSM2	Other
chr02:164050-164071;+	74.9049	1.60445	0.404952	16.0661	6.11677e-05	0.000315073	YBL026W	LSM2	Other
chr02:164172-164207;+	74.9618	-0.0544972	0.409828	0.01775	0.894012	0.926405	YBL026W	LSM2	Other
chr02:164962-164992;+	55.7658	-0.295551	0.51175	0.340768	0.559386	0.660481	YBL025W	RRN10	Other
chr02:170389-170443;-	105.213	-0.194011	0.350552	0.307137	0.579442	0.677273	YBL023C	MCM2	Other
chr02:170944-171001;-	169.798	-1.74468	0.344321	30.1048	4.09326e-08	5.43427e-07	YBL022C	PIM1	Ime4p-dependent
chr02:171003-171018;-	93.2114	-3.1779	0.876812	22.8162	1.78253e-06	1.44695e-05	YBL022C	PIM1	Ime4p-dependent
chr02:179372-179448;-	52.7425	-1.01769	0.444025	5.52869	0.0187071	0.0414509	YBL018C	POP8	Other
chr02:179963-180008;-	120.744	-0.634069	0.426409	2.23654	0.134782	0.212655	YBL017C	PEP1	Other
chr02:186595-186634;+	89.3668	-0.517618	0.37468	1.8891	0.169303	0.255485	YBL016W	FUS3	Other
chr02:187157-187226;+	3761.04	-0.96736	0.204596	22.1549	2.51507e-06	1.94963e-05	YBL015W	ACH1	Other
chr02:188322-188337;+	2323	0.844041	0.221684	14.5265	0.0001382	0.000633072	YBL015W	ACH1	Other
chr02:188343-188355;+	4186.34	1.11272	0.289141	14.8295	0.000117682	0.000554013	YBL015W	ACH1	Other
chr02:192914-192947;-	77.4252	0.148354	0.494765	0.0885786	0.765992	0.831886	YBL014C	RRN6	Other
chr02:193958-193991;-	63.0615	-0.968061	0.783341	1.77812	0.18238	0.271559	YBL014C	RRN6	Other
chr02:198343-198391;+	90.8099	-1.34075	0.616944	5.55809	0.0183955	0.0408459	YBL011W	SCT1	Other
chr02:198459-198520;+	157.195	-0.349972	0.357277	0.974087	0.323663	0.428743	YBL011W	SCT1	Other
chr02:198588-198617;+	105.476	-0.541824	0.44512	1.55457	0.212462	0.305964	YBL011W	SCT1	Other
chr02:199464-199495;+	104.17	1.51908	0.405759	14.0369	0.000179256	0.000796239	YBL011W	SCT1	Other
chr02:200166-200207;-	61.1456	-0.302191	0.419124	0.524843	0.468783	0.576829	YBL010C	YBL010C	Other
chr02:206354-206391;-	131.327	-1.36909	0.389811	12.9365	0.000322243	0.00131819	YBL007C	SLA1	Other
chr02:206476-206502;-	137.007	-2.04407	0.417028	26.8727	2.1731e-07	2.32164e-06	YBL007C	SLA1	Ime4p-dependent
chr02:210224-210251;-	65.238	-0.552612	0.438748	1.65961	0.197657	0.28946	YBL006C	LDB7	Other
chr02:210282-210308;-	64.9983	-0.0129671	0.417144	0.00096646	0.975199	0.983742	YBL006C	LDB7	Other
chr02:210317-210345;-	99.0652	0.241049	0.318138	0.569166	0.45059	0.559448	YBL006C	LDB7	Other
chr02:223757-223781;-	217.632	-0.917746	0.398822	5.51761	0.018826	0.0416553	YBL003C	HTA2	Other
chr02:223786-223804;-	209.566	-0.826122	0.398492	4.45053	0.0348904	0.0690769	YBL003C	HTA2	Other
chr02:223826-223874;-	374.816	0.0134367	0.322087	0.00173422	0.966782	0.978813	YBL003C	HTA2	Other
chr02:224210-224229;-	226.625	0.762161	0.385078	3.90108	0.0482552	0.0905463	YBL003C	HTA2	Other
chr02:224293-224313;-	320.863	0.722858	0.297917	5.86946	0.0154058	0.0353027	YBL003C	HTA2	Other
chr02:224956-224999;+	768.484	0.506188	0.301992	2.79775	0.0943968	0.157781	YBL002W	HTB2	Other
chr02:225112-225144;+	768.913	0.679626	0.236158	8.28474	0.00399795	0.0112894	YBL002W	HTB2	Other
chr02:225297-225316;+	521.627	0.789004	0.273998	8.2315	0.00411694	0.0115636	YBL002W	HTB2	Other
chr02:225424-225469;+	1165.17	1.1307	0.234566	23.2999	1.38607e-06	1.16968e-05	YBL002W	HTB2	Other
chr02:225816-225862;-	161.834	0.931512	0.326163	8.44349	0.00366353	0.0105135	YBL001C	ECM15	Other
chr02:227600-227613;-	160.418	1.3041	0.342439	14.2195	0.000162676	0.000733895	YBR001C	NTH2	Other
chr02:227656-227687;-	159.217	-0.689007	0.399109	3.21156	0.0731197	0.127447	YBR001C	NTH2	Other
chr02:227709-227729;-	134.759	-0.157568	0.439664	0.130601	0.71781	0.793113	YBR001C	NTH2	Other
chr02:227991-228004;-	146.19	1.17191	0.372028	9.63445	0.00190962	0.00604913	YBR001C	NTH2	Other
chr02:228240-228266;-	143.539	-0.00799507	0.409935	0.000380627	0.984435	0.990156	YBR001C	NTH2	Other
chr02:228288-228310;-	154.367	0.467939	0.368092	1.57113	0.210043	0.303445	YBR001C	NTH2	Other
chr02:228507-228529;-	126.666	-0.322828	0.513549	0.407775	0.523101	0.628157	YBR001C	NTH2	Other
chr02:229070-229097;-	186.918	0.844216	0.301633	7.60958	0.0058059	0.0154375	YBR001C	NTH2	Other
chr02:229103-229142;-	189.966	0.376416	0.30049	1.53877	0.2148	0.308818	YBR001C	NTH2	Other
chr02:229163-229213;-	197.707	0.172923	0.295858	0.337894	0.561047	0.661764	YBR001C	NTH2	Other
chr02:229393-229415;-	139.692	-0.0792766	0.418895	0.0360958	0.849318	0.893628	YBR001C	NTH2	Other
chr02:229689-229710;-	126.595	-0.317726	0.493251	0.428782	0.512587	0.617811	YBR001C	NTH2	Other
chr02:229766-229782;-	127.039	-2.60727	0.868284	14.9487	0.000110476	0.000523453	YBR001C	NTH2	Ime4p-dependent
chr02:229790-229830;-	153.086	-1.13295	0.46947	6.72513	0.00950637	0.0235716	YBR001C	NTH2	Other
chr02:229836-229879;-	234.491	-1.88228	0.395448	27.9141	1.26824e-07	1.4389e-06	YBR001C	NTH2	Ime4p-dependent
chr02:236856-236883;+	68.8104	-1.45659	0.483889	9.69636	0.00184633	0.00587015	YBR006W	UGA2	Other
chr02:236990-237032;+	105.46	-2.57021	0.415591	48.8135	2.81498e-12	9.46848e-11	YBR006W	UGA2	Ime4p-dependent
chr02:243961-244013;-	1399.68	0.296928	0.274602	1.16657	0.280108	0.38293	YBR009C	HHF1	Other
chr02:244155-244224;-	2852.18	0.777848	0.26745	8.47482	0.00360095	0.0103495	YBR009C	HHF1	Other
chr02:244802-244836;+	1437.3	0.976607	0.393981	6.14735	0.0131609	0.0310327	YBR010W	HHT1	Other
chr02:244934-244965;+	1117.12	1.17845	0.338572	12.1052	0.000502807	0.0019401	YBR010W	HHT1	Other
chr02:245707-245761;-	427.883	0.427055	0.221144	3.72774	0.0535158	0.0985714	YBR011C	IPP1	Other
chr02:245782-245795;-	233.64	0.421113	0.33639	1.57209	0.209904	0.303291	YBR011C	IPP1	Other
chr02:245893-245908;-	403.975	1.22778	0.257634	23.2081	1.45383e-06	1.21906e-05	YBR011C	IPP1	Other
chr02:245938-245951;-	337.153	1.28154	0.260398	25.1681	5.25447e-07	5.04715e-06	YBR011C	IPP1	Other
chr02:245957-245979;-	299.326	1.05207	0.271982	15.3922	8.73471e-05	0.00042877	YBR011C	IPP1	Other
chr02:246029-246045;-	287.243	0.921241	0.286833	10.5433	0.00116613	0.00398006	YBR011C	IPP1	Other
chr02:246410-246430;-	286.931	0.760672	0.282473	7.32328	0.00680669	0.017771	YBR011C	IPP1	Other
chr02:249680-249750;-	95.8247	0.820098	0.337939	5.95548	0.0146716	0.0339308	YBR014C	GRX7	Other
chr02:250223-250253;-	156.726	-1.67663	0.373268	21.1915	4.15605e-06	3.03618e-05	YBR015C	MNN2	Ime4p-dependent
chr02:250307-250347;-	210.53	-0.390747	0.285966	1.85313	0.17342	0.260581	YBR015C	MNN2	Other
chr02:251069-251127;-	231.184	0.280957	0.29117	0.941841	0.331805	0.43758	YBR015C	MNN2	Other
chr02:252816-252853;+	239.302	0.935014	0.230688	16.6857	4.41123e-05	0.000236167	YBR016W	YBR016W	Other
chr02:252865-252896;+	212.33	0.827825	0.243485	11.696	0.000626341	0.00233443	YBR016W	YBR016W	Other
chr02:252989-253051;+	344.525	0.504681	0.193753	6.77253	0.00925716	0.0230497	YBR016W	YBR016W	Other
chr02:253134-253153;+	147.512	0.663713	0.302912	4.82768	0.0280063	0.0576041	YBR016W	YBR016W	Other
chr02:253322-253356;+	130.979	-0.625325	0.346134	3.38664	0.0657267	0.116813	YBR016W	YBR016W	Other
chr02:254735-254774;-	68.9028	-0.255223	0.450321	0.324146	0.569127	0.669077	YBR017C	KAP104	Other
chr02:254856-254890;-	83.1046	-0.866575	0.407446	4.79281	0.0285787	0.0585438	YBR017C	KAP104	Other
chr02:265855-265906;+	102.233	-1.73367	0.364517	25.7765	3.83323e-07	3.78511e-06	YBR021W	FUR4	Ime4p-dependent
chr02:266890-266930;-	195.28	-0.810223	0.3865	4.4895	0.0341036	0.0677951	YBR023C	CHS3	Other
chr02:267033-267072;-	282.386	-1.34035	0.245447	32.0349	1.51429e-08	2.23829e-07	YBR023C	CHS3	Ime4p-dependent
chr02:267609-267623;-	190.097	-1.08125	0.398328	7.71556	0.00547468	0.0146757	YBR023C	CHS3	Other
chr02:268216-268250;-	233.071	0.0591791	0.297369	0.0396586	0.84215	0.888443	YBR023C	CHS3	Other
chr02:275370-275452;-	1030.17	-0.448186	0.134873	11.0284	0.000897247	0.00318097	YBR026C	ETR1	Other
chr02:275470-275599;-	1631.39	0.044835	0.120788	0.137595	0.710683	0.787543	YBR026C	ETR1	Other
chr02:275931-275975;-	690.668	0.690746	0.168812	17.4089	3.01404e-05	0.000170372	YBR026C	ETR1	Other
chr02:276008-276046;-	597.609	0.640039	0.18941	11.8557	0.000574846	0.00217486	YBR026C	ETR1	Other
chr02:276445-276461;-	549.327	0.639602	0.206164	10.012	0.00155521	0.00509079	YBR026C	ETR1	Other
chr02:283628-283670;+	93.0254	0.619637	0.369765	2.79207	0.0947316	0.158257	YBR031W	RPL4A	Other
chr02:283757-283784;+	93.5065	-0.762315	0.411188	3.59251	0.0580406	0.105296	YBR031W	RPL4A	Other
chr02:286735-286819;+	166.984	-0.42313	0.308836	1.93091	0.164659	0.249744	YBR033W	EDS1	Other
chr02:287176-287208;+	113.27	-0.987711	0.505202	4.22356	0.0398664	0.0771788	YBR033W	EDS1	Other
chr02:287226-287255;+	131.773	-1.73425	0.481103	16.3704	5.20913e-05	0.000274106	YBR033W	EDS1	Ime4p-dependent
chr02:287286-287329;+	191.058	-1.17573	0.311801	16.012	6.29411e-05	0.000322984	YBR033W	EDS1	Ime4p-dependent
chr02:287923-287985;-	66.8209	0.607496	0.510997	1.37781	0.240475	0.337872	YBR034C	HMT1	Other
chr02:288839-288863;-	125.92	0.10881	0.356466	0.0926325	0.760857	0.828198	YBR035C	PDX3	Other
chr02:288931-288946;-	194.978	1.35434	0.255032	29.1714	6.62496e-08	8.11621e-07	YBR035C	PDX3	Other
chr02:289063-289090;-	188.254	0.0808465	0.257273	0.0984935	0.753645	0.822417	YBR035C	PDX3	Other
chr02:289218-289237;-	136.927	0.871283	0.319472	7.43786	0.00638659	0.0167893	YBR035C	PDX3	Other
chr02:291598-291614;-	149.605	-0.838751	0.370747	5.35685	0.0206411	0.0449513	YBR036C	CSG2	Other
chr02:291643-291663;-	155.871	-0.719443	0.339359	4.6574	0.03092	0.0625697	YBR036C	CSG2	Other
chr02:291676-291699;-	156.354	0.0171998	0.335395	0.00263059	0.959095	0.973723	YBR036C	CSG2	Other
chr02:292664-292710;-	202.742	0.849287	0.276287	9.73465	0.00180827	0.00577226	YBR036C	CSG2	Other
chr02:298313-298326;+	630.774	1.06222	0.199138	28.6655	8.60225e-08	1.01847e-06	YBR039W	ATP3	Other
chr02:298364-298377;+	563.469	0.811696	0.18636	18.8887	1.38574e-05	8.60136e-05	YBR039W	ATP3	Other
chr02:298550-298565;+	423.239	-0.600317	0.250892	5.94179	0.014786	0.0341539	YBR039W	ATP3	Other
chr02:299021-299036;+	481.748	-0.210857	0.300468	0.495876	0.481318	0.589048	YBR039W	ATP3	Other
chr02:299072-299165;+	1466.43	-0.39333	0.14991	6.90393	0.00860067	0.0217104	YBR039W	ATP3	Other
chr02:311409-311447;-	79.5037	-0.18003	0.884338	0.0417783	0.838043	0.88519	YBR045C	GIP1	Other
chr02:311451-311485;-	60.6011	-0.960488	0.872769	1.27025	0.259721	0.359657	YBR045C	GIP1	Other
chr02:312993-313050;-	205.151	-1.91863	0.434953	19.6929	9.09382e-06	5.98231e-05	YBR046C	ZTA1	Ime4p-dependent
chr02:313117-313162;-	211.594	0.175836	0.326141	0.29261	0.588553	0.685397	YBR046C	ZTA1	Other
chr02:313739-313789;-	230.678	0.377736	0.307287	1.53219	0.215784	0.309952	YBR046C	ZTA1	Other
chr02:316779-316858;-	201.435	-0.501228	0.360373	1.94689	0.162923	0.247416	YBR049C	REB1	Other
chr02:317082-317179;-	157.447	0.534327	0.273166	3.78031	0.0518591	0.096059	YBR049C	REB1	Other
chr02:321280-321314;-	77.5081	0.111964	0.442347	0.0633055	0.801346	0.858324	YBR052C	RFS1	Other
chr02:321390-321428;-	86.8134	0.610544	0.665718	0.831895	0.361725	0.469045	YBR052C	RFS1	Other
chr02:321625-321678;-	101.888	1.0831	0.330238	10.1835	0.001417	0.0046998	YBR052C	RFS1	Other
chr02:321853-321884;-	85.7764	-0.747595	0.463778	2.88528	0.0893925	0.150847	YBR052C	RFS1	Other
chr02:330996-331032;+	113.309	0.716137	0.447639	2.55011	0.110287	0.179794	YBR056W	YBR056W	Other
chr02:331496-331523;+	157.082	0.89439	0.348007	6.63912	0.0099763	0.0245831	YBR056W	YBR056W	Other
chr02:331761-331792;+	127.533	0.667399	0.404643	2.72414	0.0988412	0.163864	YBR056W	YBR056W	Other
chr02:335206-335239;-	264.777	1.35705	0.243414	30.2135	3.87004e-08	5.17401e-07	YBR057C	MUM2	Other
chr02:335247-335311;-	313.566	0.850652	0.215125	15.0759	0.000103272	0.00049474	YBR057C	MUM2	Other
chr02:335387-335410;-	194.855	0.31789	0.358263	0.767448	0.381008	0.489977	YBR057C	MUM2	Other
chr02:335493-335512;-	267.027	1.12034	0.240708	20.896	4.84905e-06	3.46533e-05	YBR057C	MUM2	Other
chr02:335542-335618;-	396.823	0.994398	0.182705	28.6916	8.48691e-08	1.00606e-06	YBR057C	MUM2	Other
chr02:335848-335885;-	289.448	0.929381	0.233397	15.2758	9.28966e-05	0.000451626	YBR057C	MUM2	Other
chr02:335898-335914;-	222.854	1.42739	0.29215	23.2104	1.45212e-06	1.21906e-05	YBR057C	MUM2	Other
chr02:336001-336020;-	194.178	0.789849	0.347749	4.93919	0.0262543	0.054698	YBR057C	MUM2	Other
chr02:336079-336108;-	208.321	0.460929	0.31611	2.06211	0.151001	0.233303	YBR057C	MUM2	Other
chr02:336512-336536;-	109.47	-0.368883	0.370672	0.984423	0.321109	0.426012	YBR058C	UBP14	Other
chr02:339114-339155;-	368.469	0.478184	0.219647	4.68873	0.030361	0.0615694	YBR058C-A	TSC3	Other
chr02:339244-339268;-	321.396	1.31906	0.230228	32.8648	9.87941e-09	1.51681e-07	YBR058C-A	TSC3	Other
chr02:339379-339403;-	230.301	0.536188	0.616819	0.75077	0.386232	0.495692	YBR058C-A	TSC3	Other
chr02:348773-348808;-	274.928	0.395457	0.261999	2.26202	0.132581	0.209606	YBR062C	YBR062C	Other
chr02:348853-348869;-	151.909	0.953814	0.324271	8.44153	0.00366748	0.0105216	YBR062C	YBR062C	Other
chr02:348992-349018;-	178.711	0.655691	0.308469	4.44491	0.0350055	0.0692904	YBR062C	YBR062C	Other
chr02:349128-349142;-	151.944	0.985345	0.328691	8.79707	0.00301714	0.00892997	YBR062C	YBR062C	Other
chr02:349288-349325;-	194.105	1.03657	0.331281	9.65881	0.00188446	0.00597939	YBR062C	YBR062C	Other
chr02:355352-355372;-	607.355	-1.62865	0.287029	32.1139	1.45393e-08	2.16249e-07	YBR067C	TIP1	Ime4p-dependent
chr02:355380-355441;-	1251.05	-2.88016	0.244271	135.813	2.19286e-31	1.15966e-28	YBR067C	TIP1	Ime4p-dependent
chr02:356593-356620;-	602.448	0.129838	0.252164	0.265509	0.60636	0.700479	YBR068C	BAP2	Other
chr02:356653-356667;-	515.943	-0.0768765	0.310246	0.0611355	0.80471	0.860581	YBR068C	BAP2	Other
chr02:356687-356766;-	955.905	-0.23774	0.195649	1.47438	0.224655	0.319855	YBR068C	BAP2	Other
chr02:356896-356916;-	624.366	0.713029	0.238905	9.13955	0.00250143	0.00762289	YBR068C	BAP2	Other
chr02:357819-357869;-	655.513	-0.674822	0.229952	8.59118	0.00337795	0.00978834	YBR068C	BAP2	Other
chr02:357910-357924;-	460.236	-1.11648	0.324283	12.044	0.000519582	0.00199638	YBR068C	BAP2	Other
chr02:357927-358034;-	1027.95	-1.82321	0.414234	18.9662	1.33055e-05	8.32707e-05	YBR068C	BAP2	Ime4p-dependent
chr02:359038-359070;-	102.525	-2.16651	0.793606	10.2033	0.0014019	0.00465436	YBR069C	TAT1	Other
chr02:359170-359230;-	186.205	-0.727124	0.380608	3.76701	0.0522729	0.0966936	YBR069C	TAT1	Other
chr02:361301-361372;-	111.43	-1.82494	0.670038	9.25762	0.00234518	0.0072176	YBR069C	TAT1	Other
chr02:362143-362181;-	130.205	-0.238544	0.324556	0.542384	0.461446	0.56942	YBR070C	ALG14	Other
chr02:362203-362221;-	137.659	-0.0281652	0.315115	0.00799448	0.928755	0.951942	YBR070C	ALG14	Other
chr02:363902-363965;+	410.914	-2.63941	0.238421	123.355	1.1659e-28	4.43929e-26	YBR071W	YBR071W	Ime4p-dependent
chr02:364036-364070;+	365.092	-1.14853	0.369667	9.56354	0.0019848	0.00624572	YBR071W	YBR071W	Other
chr02:365329-365366;+	151.667	0.243502	0.351639	0.473814	0.491238	0.597354	YBR072W	HSP26	Other
chr02:365441-365492;+	165.399	0.383479	0.364548	1.1041	0.293368	0.397179	YBR072W	HSP26	Other
chr02:367784-367820;+	159.18	-1.27531	0.33839	13.782	0.000205294	0.000890293	YBR073W	RDH54	Ime4p-dependent
chr02:368802-368844;+	190.537	-1.75747	0.28555	38.1939	6.40529e-10	1.33127e-08	YBR073W	RDH54	Ime4p-dependent
chr02:368853-368901;+	181.425	-2.45322	0.322758	62.7196	2.38329e-15	1.35848e-13	YBR073W	RDH54	Ime4p-dependent
chr02:374537-374562;-	95.7357	0.0228968	0.395605	0.0033443	0.953884	0.97071	YBR077C	SLM4	Other
chr02:374568-374612;-	145.889	-0.648594	0.323144	4.22448	0.0398449	0.0771529	YBR077C	SLM4	Other
chr02:374631-374658;-	89.2072	-1.33885	0.519529	7.76984	0.00531257	0.0143097	YBR077C	SLM4	Other
chr02:374663-374685;-	127.291	0.811671	0.324032	6.18811	0.0128611	0.0304011	YBR077C	SLM4	Other
chr02:374785-374799;-	82.4573	-0.345799	0.464347	0.569107	0.450614	0.559448	YBR077C	SLM4	Other
chr02:374824-374836;-	84.3843	-0.0394174	0.44178	0.00797499	0.928841	0.951942	YBR077C	SLM4	Other
chr02:375954-375975;+	411.671	-1.34104	0.450622	8.83247	0.00295918	0.00878889	YBR078W	ECM33	Other
chr02:375978-376007;+	459.816	-0.850817	0.341235	6.20087	0.0127688	0.0302278	YBR078W	ECM33	Other
chr02:376385-376423;+	493.975	-0.359911	0.315276	1.30232	0.25379	0.352315	YBR078W	ECM33	Other
chr02:376887-376907;+	382.315	-0.503061	0.39843	1.58064	0.208668	0.301948	YBR078W	ECM33	Other
chr02:377392-377412;+	402.9	-0.483731	0.350063	1.91526	0.166381	0.251894	YBR078W	ECM33	Other
chr02:377492-377508;+	385.603	-0.0102498	0.389343	0.000691339	0.979023	0.986172	YBR078W	ECM33	Other
chr02:377657-377680;+	426.623	-0.842738	0.404205	4.31723	0.0377282	0.0737746	YBR078W	ECM33	Other
chr02:377686-377702;+	451.105	-0.0112112	0.321017	0.00122061	0.97213	0.982002	YBR078W	ECM33	Other
chr02:377766-377800;+	474.639	0.0118462	0.387178	0.00093716	0.975578	0.983847	YBR078W	ECM33	Other
chr02:384520-384591;-	136.521	0.56472	0.623454	0.82881	0.362617	0.469946	YBR081C	SPT7	Other
chr02:386097-386129;-	123.996	0.00246099	0.354995	4.80666e-05	0.994468	0.996772	YBR081C	SPT7	Other
chr02:386603-386655;-	88.787	-0.401343	0.527263	0.592866	0.441313	0.549922	YBR081C	SPT7	Other
chr02:387810-387850;-	91.3771	-3.73205	1.05172	26.848	2.20099e-07	2.33837e-06	YBR081C	SPT7	Ime4p-dependent
chr02:387893-387921;-	105.072	-0.965884	0.462328	4.72742	0.0296854	0.0603923	YBR081C	SPT7	Other
chr02:389451-389515;-	191.273	-1.11193	0.264773	18.9292	1.35657e-05	8.46214e-05	YBR082C	UBC4	Ime4p-dependent
chr02:389613-389632;-	73.4149	-0.132746	0.40101	0.110182	0.739937	0.810898	YBR082C	UBC4	Other
chr02:389763-389784;-	105.785	0.847745	0.327951	6.73382	0.00946019	0.0234815	YBR082C	UBC4	Other
chr02:396483-396506;+	80.4473	-1.86221	0.563378	13.9271	0.000190035	0.000834385	YBR084W	MIS1	Ime4p-dependent
chr02:397019-397093;-	188.348	0.155868	0.257503	0.366056	0.545162	0.647784	YBR084C-A	RPL19A	Other
chr02:397140-397156;-	84.4745	-0.526358	0.462066	1.32037	0.250525	0.348954	YBR084C-A	RPL19A	Other
chr02:397617-397636;-	157.663	0.43867	0.77904	0.31587	0.5741	0.67351	YBR084C-A	RPL19A	Other
chr02:401555-401578;-	1453.06	0.254138	0.153288	2.73678	0.098062	0.162821	YBR085C-A	YBR085C-A	Other
chr02:401715-401775;-	2152.14	0.38232	0.136822	7.7974	0.00523214	0.0141424	YBR085C-A	YBR085C-A	Other
chr02:401800-401817;-	1366.34	0.621904	0.220195	7.98111	0.00472681	0.0129929	YBR085C-A	YBR085C-A	Other
chr02:401847-401907;-	2031.34	0.414638	0.197044	4.42492	0.0354177	0.0700045	YBR085C-A	YBR085C-A	Other
chr02:401994-402014;-	1303.82	0.905989	0.170713	28.0605	1.17582e-07	1.34527e-06	YBR085C-A	YBR085C-A	Other
chr02:403032-403057;-	198.768	-1.90212	0.341031	30.0723	4.16242e-08	5.51657e-07	YBR086C	IST2	Ime4p-dependent
chr02:403060-403083;-	135.708	-3.75774	0.580571	50.6956	1.07864e-12	3.90401e-11	YBR086C	IST2	Ime4p-dependent
chr02:403105-403130;-	168.383	-1.51747	0.403555	13.4639	0.000243202	0.00103166	YBR086C	IST2	Other
chr02:403241-403280;-	304.14	-0.181275	0.310724	0.338184	0.560879	0.661764	YBR086C	IST2	Other
chr02:407991-408012;-	181.736	0.667213	0.3445	3.86962	0.0491675	0.0919362	YBR088C	POL30	Other
chr02:408186-408267;-	521.9	0.852697	0.221385	15.0609	0.000104096	0.000497682	YBR088C	POL30	Other
chr02:408273-408347;-	401.28	0.03612	0.219292	0.0271314	0.869167	0.909287	YBR088C	POL30	Other
chr02:415717-415756;+	123.231	-1.72113	0.399176	22.7176	1.87646e-06	1.5163e-05	YBR094W	PBY1	Ime4p-dependent
chr02:415780-415802;+	73.7946	-1.60782	0.611762	8.42766	0.00369555	0.0105958	YBR094W	PBY1	Other
chr02:416073-416130;+	110.587	0.074096	0.342015	0.0468604	0.828619	0.878844	YBR094W	PBY1	Other
chr02:417284-417434;-	175.749	-0.376578	0.28468	1.77362	0.182935	0.272087	YBR095C	RXT2	Other
chr02:419112-419150;+	92.0507	-2.05307	0.52936	20.1273	7.2455e-06	4.91589e-05	YBR096W	YBR096W	Ime4p-dependent
chr02:419438-419465;+	77.3812	-1.46109	0.54255	8.66448	0.00324473	0.00948314	YBR096W	YBR096W	Other
chr02:419495-419518;+	69.1874	-1.59345	0.607382	8.48033	0.00359006	0.01033	YBR096W	YBR096W	Other
chr02:426699-426730;-	84.2578	-1.70401	0.464943	15.5388	8.08302e-05	0.000401969	YBR101C	FES1	Ime4p-dependent
chr02:427905-427957;-	59.1247	-0.878076	0.476484	3.68154	0.0550181	0.100909	YBR102C	EXO84	Other
chr02:431896-431936;+	85.4576	-1.32979	0.442553	10.0614	0.00151406	0.00496807	YBR103W	SIF2	Other
chr02:433671-433693;-	147.951	0.285556	0.366075	0.605935	0.436322	0.544773	YBR105C	VID24	Other
chr02:435594-435630;+	329.912	0.224986	0.200581	1.23835	0.265788	0.36646	YBR106W	PHO88	Other
chr02:436097-436132;+	239.904	0.732323	0.237066	9.16776	0.00246316	0.00752223	YBR106W	PHO88	Other
chr02:436408-436442;-	50.7846	-2.48205	0.564446	26.2502	2.99929e-07	3.04698e-06	YBR107C	IML3	Ime4p-dependent
chr02:438958-439017;+	106.327	-0.427728	0.411377	1.0683	0.30133	0.405824	YBR108W	YBR108W	Other
chr02:440437-440496;+	155.536	-0.637283	0.319136	3.96502	0.0464551	0.0879661	YBR108W	YBR108W	Other
chr02:440651-440689;-	156.437	-0.93729	0.389182	6.34015	0.0118035	0.0282945	YBR109C	CMD1	Other
chr02:440725-440750;-	154.98	0.173104	0.353221	0.238711	0.625139	0.716433	YBR109C	CMD1	Other
chr02:440871-440904;-	189.352	0.761331	0.289882	6.87832	0.00872474	0.0219305	YBR109C	CMD1	Other
chr02:440942-440991;-	283.132	0.859113	0.21515	15.9656	6.45027e-05	0.000330044	YBR109C	CMD1	Other
chr02:444044-444092;-	151.533	0.88497	0.351857	6.34107	0.0117973	0.0282869	YBR111C	YSA1	Other
chr02:444232-444271;-	154.108	1.20474	0.349271	12.1188	0.00049917	0.00192684	YBR111C	YSA1	Other
chr02:444588-444614;-	168.485	0.669679	0.323602	4.28199	0.0385182	0.0751035	YBR111C	YSA1	Other
chr02:444685-444740;-	159.442	-0.35656	0.354243	1.02236	0.31196	0.416428	YBR111C	YSA1	Other
chr02:446554-446584;-	88.0332	0.55307	0.465413	1.39967	0.236779	0.333813	YBR112C	CYC8	Other
chr02:446719-446754;-	75.9482	-0.693182	0.598996	1.41049	0.234975	0.33171	YBR112C	CYC8	Other
chr02:450900-450914;+	64.0001	-5.45405	1.20057	37.2064	1.06265e-09	2.10585e-08	YBR114W	RAD16	Ime4p-dependent
chr02:450917-450934;+	83.076	-3.16658	0.748278	33.5281	7.02428e-09	1.12e-07	YBR114W	RAD16	Ime4p-dependent
chr02:450940-450977;+	127.388	-2.69943	0.509799	44.589	2.43048e-11	6.82469e-10	YBR114W	RAD16	Ime4p-dependent
chr02:460401-460443;+	514.599	0.858389	0.21968	15.3187	9.08139e-05	0.00044263	YBR118W	TEF2	Other
chr02:461674-461700;+	458.102	0.0113439	0.294265	0.00148381	0.969273	0.980605	YBR118W	TEF2	Other
chr02:461701-461722;+	376.753	-0.0808957	0.398374	0.0408282	0.83987	0.886529	YBR118W	TEF2	Other
chr02:461742-461792;+	548.842	0.728738	0.190783	14.6646	0.000128433	0.00059695	YBR118W	TEF2	Other
chr02:463006-463074;+	210.072	-1.22744	0.289721	19.1895	1.18362e-05	7.50628e-05	YBR119W	MUD1	Ime4p-dependent
chr02:464089-464116;-	129.12	-0.791961	0.414367	3.89006	0.0485728	0.0910167	YBR121C	GRS1	Other
chr02:464150-464183;-	124.688	-0.0243504	0.400976	0.00368945	0.951566	0.968972	YBR121C	GRS1	Other
chr02:464245-464284;-	127.056	-0.342168	0.394217	0.768946	0.380543	0.489578	YBR121C	GRS1	Other
chr02:465694-465710;-	108.726	-2.29974	0.694709	15.613	7.772e-05	0.000388355	YBR121C	GRS1	Ime4p-dependent
chr02:465713-465733;-	120.764	-0.76598	0.437816	3.25821	0.0710667	0.124377	YBR121C	GRS1	Other
chr02:465740-465772;-	145.28	-0.506595	0.360747	2.03156	0.154063	0.237225	YBR121C	GRS1	Other
chr02:466825-466882;-	50.2332	0.45503	0.467962	0.919854	0.337513	0.443422	YBR122C	MRPL36	Other
chr02:467700-467723;-	74.0276	-2.2008	0.579575	20.9482	4.71871e-06	3.40026e-05	YBR123C	TFC1	Ime4p-dependent
chr02:467737-467790;-	113.83	-1.92747	0.417696	28.6373	8.72853e-08	1.03213e-06	YBR123C	TFC1	Ime4p-dependent
chr02:469917-469974;-	127.454	0.676837	0.309988	4.77269	0.0289147	0.0590886	YBR125C	PTC4	Other
chr02:470171-470222;-	111.107	-0.336913	0.357096	0.905098	0.341418	0.447416	YBR125C	PTC4	Other
chr02:470662-470699;-	151.444	-0.81103	0.297106	7.89493	0.00495735	0.0135096	YBR125C	PTC4	Other
chr02:471592-471611;-	128.422	-0.530367	0.430477	1.55192	0.212852	0.306434	YBR126C	TPS1	Other
chr02:471622-471665;-	182.65	0.371719	0.334948	1.23246	0.266929	0.367714	YBR126C	TPS1	Other
chr02:471729-471786;-	218.456	0.852236	0.312017	7.5412	0.00603039	0.0159675	YBR126C	TPS1	Other
chr02:472829-472849;-	112.832	0.30092	0.478663	0.393144	0.530651	0.634502	YBR126C	TPS1	Other
chr02:474004-474035;-	166.103	0.130177	0.306293	0.180543	0.670907	0.754533	YBR127C	VMA2	Other
chr02:474130-474167;-	270.426	-0.418639	0.221672	3.61247	0.0573478	0.104178	YBR127C	VMA2	Other
chr02:474184-474196;-	137.323	0.193727	0.367169	0.277863	0.598105	0.69372	YBR127C	VMA2	Other
chr02:474230-474253;-	145.498	0.242896	0.341907	0.504227	0.477649	0.585845	YBR127C	VMA2	Other
chr02:474260-474288;-	143.393	-0.0981829	0.346899	0.0803574	0.776814	0.840187	YBR127C	VMA2	Other
chr02:474348-474387;-	163.541	-1.58278	0.361054	22.3251	2.30177e-06	1.8093e-05	YBR127C	VMA2	Ime4p-dependent
chr02:474507-474525;-	146.798	0.0120908	0.345293	0.00122585	0.97207	0.982002	YBR127C	VMA2	Other
chr02:474655-474694;-	214.65	1.16441	0.272542	19.0093	1.30082e-05	8.17327e-05	YBR127C	VMA2	Other
chr02:477208-477240;-	85.9099	0.194174	0.379381	0.261456	0.609122	0.702966	YBR129C	OPY1	Other
chr02:484143-484176;-	112.613	-0.232855	0.468133	0.251082	0.616314	0.709138	YBR132C	AGP2	Other
chr02:484724-484770;-	64.9051	0.362226	0.771878	0.219737	0.639241	0.728516	YBR133C	HSL7	Other
chr02:487937-487964;+	77.0176	0.061503	0.411783	0.0222071	0.881538	0.918393	YBR135W	CKS1	Other
chr02:488074-488166;+	141.583	0.529425	0.275676	3.62615	0.0568783	0.103523	YBR135W	CKS1	Other
chr02:495511-495569;+	151.568	0.184062	0.443627	0.172484	0.677914	0.759273	YBR136W	MEC1	Other
chr02:496202-496228;+	46.3542	-0.0790924	0.542298	0.0213703	0.883775	0.919818	YBR137W	YBR137W	Other
chr02:498839-498858;+	193.57	-0.0687436	0.354394	0.0377447	0.845957	0.890999	YBR139W	YBR139W	Other
chr02:499091-499114;+	194.59	-1.03523	0.375591	8.16028	0.00428179	0.0119491	YBR139W	YBR139W	Other
chr02:499128-499153;+	205.055	-0.749574	0.34275	4.98106	0.0256262	0.053577	YBR139W	YBR139W	Other
chr02:499243-499265;+	248.072	0.664852	0.277028	5.79765	0.0160476	0.0364385	YBR139W	YBR139W	Other
chr02:499717-499736;+	235.689	1.04761	0.412149	6.54226	0.0105341	0.0257775	YBR139W	YBR139W	Other
chr02:499775-499794;+	225.033	0.429925	0.305434	1.97829	0.159571	0.243539	YBR139W	YBR139W	Other
chr02:499832-499850;+	286.085	0.70396	0.253061	7.79245	0.0052465	0.0141678	YBR139W	YBR139W	Other
chr02:499861-499889;+	296	1.26515	0.262071	24.0609	9.33373e-07	8.33468e-06	YBR139W	YBR139W	Other
chr02:499962-499987;+	248.395	0.665768	0.282105	5.60755	0.0178832	0.0399227	YBR139W	YBR139W	Other
chr02:505541-505620;-	197.199	-0.625651	0.494131	1.63469	0.201055	0.293354	YBR140C	IRA1	Other
chr02:513783-513810;-	175.773	0.489006	0.312462	2.35536	0.124853	0.199142	YBR143C	SUP45	Other
chr02:513892-513926;-	171.511	-1.12246	0.749043	2.2345	0.13496	0.212767	YBR143C	SUP45	Other
chr02:513938-513954;-	133.637	-1.0674	0.591432	3.84941	0.0497636	0.0928096	YBR143C	SUP45	Other
chr02:513978-513999;-	179.759	-0.264932	0.346893	0.601581	0.437975	0.546551	YBR143C	SUP45	Other
chr02:514005-514031;-	207.83	-0.776813	0.329998	6.15182	0.0131277	0.0309696	YBR143C	SUP45	Other
chr02:518560-518601;+	75.7756	1.28313	0.409467	9.74342	0.00179966	0.00574865	YBR146W	MRPS9	Other
chr02:518916-518953;+	70.0644	0.241738	0.445398	0.290131	0.590136	0.686821	YBR146W	MRPS9	Other
chr02:519001-519023;+	62.951	-0.107359	0.507001	0.0452441	0.831556	0.881225	YBR146W	MRPS9	Other
chr02:519780-519823;+	117.479	-0.17242	0.388645	0.199448	0.655166	0.741561	YBR147W	YBR147W	Other
chr02:520162-520192;+	84.475	-0.929933	0.518281	3.45548	0.0630425	0.112907	YBR147W	YBR147W	Other
chr02:520268-520290;+	88.3146	-0.653465	0.477713	1.95186	0.162387	0.246809	YBR147W	YBR147W	Other
chr02:521003-521042;+	123.19	0.576356	0.81148	0.482616	0.48724	0.594468	YBR148W	YSW1	Other
chr02:521485-521507;+	113.201	-0.0640931	0.814481	0.00621451	0.937166	0.95769	YBR148W	YSW1	Other
chr02:521520-521563;+	171.384	-0.0810782	0.729818	0.0123057	0.911671	0.939504	YBR148W	YSW1	Other
chr02:521628-521649;+	124.63	-0.133479	0.752881	0.0320625	0.85789	0.900558	YBR148W	YSW1	Other
chr02:523122-523152;+	277.066	0.54318	0.287523	3.70298	0.0543155	0.0997992	YBR149W	ARA1	Other
chr02:523813-523912;+	589.922	-1.02954	0.1748	34.7279	3.79153e-09	6.45645e-08	YBR149W	ARA1	Ime4p-dependent
chr02:528531-528603;+	894.699	-1.52	0.221362	48.0283	4.20108e-12	1.35102e-10	YBR151W	APD1	Ime4p-dependent
chr02:528666-528681;+	204.788	-0.971077	0.313527	10.5673	0.00115105	0.00393708	YBR151W	APD1	Other
chr02:533774-533825;-	105.557	-0.98546	0.63231	2.71978	0.0991119	0.164249	YBR156C	SLI15	Other
chr02:533827-533874;-	150.534	0.084203	0.376547	0.0498886	0.823257	0.874619	YBR156C	SLI15	Other
chr02:533894-533925;-	140.953	0.26179	0.402842	0.415753	0.519064	0.624333	YBR156C	SLI15	Other
chr02:534387-534461;-	185.557	0.868299	0.661624	1.71721	0.190052	0.280178	YBR156C	SLI15	Other
chr02:534631-534664;-	117.508	1.04453	0.444109	5.39915	0.0201466	0.0441066	YBR156C	SLI15	Other
chr02:534699-534744;-	130.61	0.0459339	0.423045	0.0117631	0.913633	0.940609	YBR156C	SLI15	Other
chr02:534904-534951;-	133.481	1.06251	0.404966	6.74007	0.00942711	0.0234116	YBR156C	SLI15	Other
chr02:535041-535084;-	129.025	0.418483	0.413755	1.00461	0.316197	0.421021	YBR156C	SLI15	Other
chr02:535251-535315;-	149.926	0.341708	0.375216	0.816136	0.366312	0.473703	YBR156C	SLI15	Other
chr02:535611-535642;-	102.036	-1.68771	0.789633	5.83163	0.0157405	0.0358712	YBR156C	SLI15	Other
chr02:541559-541602;+	109.034	-0.255167	0.450474	0.325866	0.568103	0.667956	YBR159W	IFA38	Other
chr02:542441-542460;+	133.807	0.418064	0.340306	1.48673	0.222724	0.317954	YBR159W	IFA38	Other
chr02:542471-542503;+	164.397	0.791881	0.297129	7.01443	0.00808552	0.0205318	YBR159W	IFA38	Other
chr02:542953-542991;+	186.218	1.01659	0.275853	13.2289	0.000275669	0.00115041	YBR160W	CDC28	Other
chr02:543234-543271;+	169.689	0.323555	0.306004	1.0953	0.295299	0.399283	YBR160W	CDC28	Other
chr02:543458-543472;+	131.514	0.949263	0.36373	6.60313	0.01018	0.0250202	YBR160W	CDC28	Other
chr02:543511-543544;+	161.647	0.46599	0.319763	2.06576	0.15064	0.232903	YBR160W	CDC28	Other
chr02:543678-543705;+	132.021	0.46155	0.376278	1.46421	0.226261	0.321651	YBR160W	CDC28	Other
chr02:543747-543768;+	191.308	0.841602	0.282163	8.63348	0.0033004	0.00961044	YBR160W	CDC28	Other
chr02:545840-545875;-	97.7135	-0.776592	0.484269	2.61281	0.106004	0.173824	YBR162C	TOS1	Other
chr02:545930-545968;-	120.048	-0.718615	0.409325	3.1322	0.0767599	0.132947	YBR162C	TOS1	Other
chr02:547501-547525;-	99.3188	-0.157862	0.477914	0.109263	0.740985	0.811782	YBR162C	TOS1	Other
chr02:548048-548067;+	49.3999	-1.51052	0.701563	5.82266	0.015821	0.0360273	YBR162W-A	YSY6	Other
chr02:548193-548231;+	98.2079	0.507867	0.326367	2.3617	0.124347	0.198467	YBR162W-A	YSY6	Other
chr02:548237-548274;+	87.7933	0.776847	0.340133	5.06798	0.0243717	0.0514742	YBR162W-A	YSY6	Other
chr02:549924-549972;+	49.7889	-2.92596	0.768727	22.8976	1.70865e-06	1.39621e-05	YBR163W	EXO5	Ime4p-dependent
chr02:552059-552082;+	69.6183	-1.60476	0.492214	12.8245	0.000342111	0.00138224	YBR165W	UBS1	Other
chr02:552095-552117;+	99.2136	-2.61764	0.492429	42.2234	8.14187e-11	2.04492e-09	YBR165W	UBS1	Ime4p-dependent
chr02:552134-552152;+	47.5642	-2.75392	0.880464	15.6703	7.53985e-05	0.000378544	YBR165W	UBS1	Ime4p-dependent
chr02:556688-556709;-	169.275	0.457612	0.375917	1.44994	0.228537	0.324258	YBR169C	SSE2	Other
chr02:556887-556914;-	255.33	1.40449	0.244449	33.2789	7.98459e-09	1.24659e-07	YBR169C	SSE2	Other
chr02:557144-557162;-	160.955	0.421115	0.405123	1.05806	0.303659	0.408267	YBR169C	SSE2	Other
chr02:557505-557536;-	191.855	0.626097	0.314175	3.8845	0.0487338	0.0912465	YBR169C	SSE2	Other
chr02:557969-558006;-	232.796	-0.799728	0.300503	7.68106	0.00558033	0.0149203	YBR169C	SSE2	Other
chr02:558011-558025;-	162.477	-1.66633	0.5546	11.59	0.000663077	0.00245024	YBR169C	SSE2	Other
chr02:558044-558105;-	346.076	-2.0459	0.296563	60.8409	6.18798e-15	3.27241e-13	YBR169C	SSE2	Ime4p-dependent
chr02:558134-558157;-	184.437	-3.41972	0.742555	43.5176	4.20173e-11	1.11721e-09	YBR169C	SSE2	Ime4p-dependent
chr02:559254-559298;-	95.4259	0.168611	0.418353	0.161041	0.6882	0.768623	YBR170C	NPL4	Other
chr02:560003-560041;-	102.01	-1.39263	0.464136	10.784	0.00102379	0.00355969	YBR170C	NPL4	Other
chr02:560072-560099;-	103.882	-0.633612	0.414151	2.4822	0.115141	0.186335	YBR170C	NPL4	Other
chr02:560517-560581;-	104.785	-0.876331	0.431166	4.52844	0.0333359	0.0665948	YBR170C	NPL4	Other
chr02:564635-564739;-	867.143	0.742632	0.354792	4.37432	0.0364845	0.0718295	YBR173C	UMP1	Other
chr02:564757-564785;-	304.544	0.623748	0.359621	2.98361	0.0841115	0.143307	YBR173C	UMP1	Other
chr02:564888-564902;-	222.054	0.503492	0.306912	2.57312	0.108693	0.177652	YBR173C	UMP1	Other
chr02:564919-565003;-	632.081	0.958891	0.295852	10.4653	0.00121641	0.00413388	YBR173C	UMP1	Other
chr02:566180-566256;+	64.1255	-3.58861	1.04195	26.6855	2.39415e-07	2.50163e-06	YBR175W	SWD3	Ime4p-dependent
chr02:568071-568109;-	111.893	-0.642201	0.365966	3.18202	0.0744527	0.129488	YBR177C	EHT1	Other
chr02:569480-569535;-	91.9004	-1.20127	0.540047	5.74195	0.0165644	0.0373996	YBR179C	FZO1	Other
chr02:570191-570253;-	109.442	0.669555	0.630188	1.12513	0.288817	0.392357	YBR179C	FZO1	Other
chr02:580263-580300;+	195.226	1.2822	0.369671	11.0637	0.000880321	0.0031338	YBR184W	YBR184W	Other
chr02:580317-580333;+	172.882	0.985291	0.455416	4.26812	0.0388338	0.0756104	YBR184W	YBR184W	Other
chr02:580536-580562;+	201.908	0.463945	0.404146	1.26378	0.260937	0.360973	YBR184W	YBR184W	Other
chr02:580568-580628;+	303.07	0.687006	0.29464	5.21668	0.0223712	0.0481029	YBR184W	YBR184W	Other
chr02:580779-580810;+	206.371	0.930051	0.372323	5.85626	0.0155217	0.0355	YBR184W	YBR184W	Other
chr02:580878-580891;+	166.756	1.13354	0.457154	5.56957	0.0182753	0.0406264	YBR184W	YBR184W	Other
chr02:581345-581362;+	163.058	-0.526913	0.644887	0.723223	0.395089	0.504812	YBR184W	YBR184W	Other
chr02:581442-581456;+	163.055	-0.276083	0.609561	0.212911	0.644495	0.732676	YBR184W	YBR184W	Other
chr02:581543-581563;+	168.709	0.148028	0.525054	0.0779257	0.780128	0.842528	YBR184W	YBR184W	Other
chr02:581564-581648;+	367.152	-0.44389	0.345069	1.69296	0.193211	0.284043	YBR184W	YBR184W	Other
chr02:582013-582036;-	82.4924	-1.15938	0.602176	4.35429	0.0369159	0.0725288	YBR185C	MBA1	Other
chr02:582902-582920;-	177.614	0.753257	0.246533	9.08899	0.00257153	0.00781059	YBR185C	MBA1	Other
chr02:582930-582955;-	111.482	0.0623708	0.364114	0.029196	0.864327	0.905617	YBR185C	MBA1	Other
chr02:582965-583027;-	261.664	0.448515	0.209215	4.5188	0.0335243	0.0668729	YBR185C	MBA1	Other
chr02:583853-583873;+	239.737	-0.199904	0.362898	0.310078	0.577632	0.675898	YBR186W	PCH2	Other
chr02:583914-583940;+	258.403	-0.302331	0.338315	0.825277	0.363642	0.471079	YBR186W	PCH2	Other
chr02:583993-584065;+	393.393	-0.356861	0.242468	2.227	0.135617	0.21352	YBR186W	PCH2	Other
chr02:584068-584083;+	202.597	-0.0321336	0.45191	0.00507671	0.943198	0.961995	YBR186W	PCH2	Other
chr02:584245-584275;+	247.092	-1.98458	0.541289	19.0616	1.26563e-05	7.98907e-05	YBR186W	PCH2	Ime4p-dependent
chr02:584323-584341;+	217.274	-2.16778	0.675032	15.622	7.7348e-05	0.000387106	YBR186W	PCH2	Ime4p-dependent
chr02:584369-584383;+	211.15	-0.881415	0.503922	3.47891	0.0621558	0.111655	YBR186W	PCH2	Other
chr02:584400-584414;+	231.03	-0.168118	0.378629	0.200876	0.654015	0.740522	YBR186W	PCH2	Other
chr02:584440-584459;+	250.143	0.531056	0.311589	2.80983	0.0936886	0.156735	YBR186W	PCH2	Other
chr02:584469-584523;+	403.269	-0.201946	0.244841	0.686785	0.40726	0.516963	YBR186W	PCH2	Other
chr02:584916-584970;+	270.799	-0.349248	0.318779	1.24844	0.263851	0.364211	YBR186W	PCH2	Other
chr02:585758-585793;+	208.481	0.783306	0.594379	1.75085	0.18577	0.275229	YBR187W	GDT1	Other
chr02:585870-585909;+	260.541	0.872874	0.239327	12.8866	0.000330942	0.00134972	YBR187W	GDT1	Other
chr02:586192-586224;+	184.691	-0.193447	0.325907	0.359307	0.548892	0.650997	YBR187W	GDT1	Other
chr02:586232-586263;+	202.815	0.835361	0.265472	9.48801	0.00206819	0.00648456	YBR187W	GDT1	Other
chr02:595007-595123;-	366.263	-0.82848	0.349184	5.58823	0.0180815	0.0402615	YBR196C	PGI1	Other
chr02:596829-596870;-	51.0613	-0.0876295	0.427103	0.0421437	0.837346	0.884761	YBR196C-A	YBR196C-A	Other
chr02:602039-602065;+	128.939	-0.150459	0.349933	0.185791	0.666443	0.751021	YBR199W	KTR4	Other
chr02:602260-602336;+	245.239	0.0424184	0.348727	0.0148165	0.903119	0.932608	YBR199W	KTR4	Other
chr02:602439-602461;+	96.5666	-0.183643	0.452452	0.165987	0.683703	0.764587	YBR199W	KTR4	Other
chr02:603091-603121;+	102.61	-0.146888	0.423693	0.120864	0.728099	0.801245	YBR199W	KTR4	Other
chr02:605392-605477;+	91.7273	-1.94788	0.399464	25.9932	3.42614e-07	3.43661e-06	YBR200W	BEM1	Ime4p-dependent
chr02:606378-606423;+	46.2608	-1.70571	0.536213	11.7373	0.000612608	0.00229312	YBR201W	DER1	Other
chr02:606507-606565;+	47.0786	-1.61174	0.540429	10.1393	0.0014514	0.00479717	YBR201W	DER1	Other
chr02:607186-607203;-	130.553	1.09554	0.354869	9.00743	0.00268884	0.00811769	YBR201C-A	YBR201C-A	Other
chr02:607231-607267;-	153.913	0.222284	0.346018	0.407032	0.52348	0.628371	YBR201C-A	YBR201C-A	Other
chr02:607317-607353;-	155.579	-0.53973	0.399502	1.92631	0.165162	0.250287	YBR201C-A	YBR201C-A	Other
chr02:607387-607433;-	188.245	0.117716	0.694843	0.0283369	0.866319	0.907005	YBR201C-A	YBR201C-A	Other
chr02:611024-611077;+	128.01	-1.47703	0.351251	18.0504	2.15137e-05	0.000126413	YBR202W	MCM7	Ime4p-dependent
chr02:614543-614612;+	171.438	-1.62767	0.36613	20.2341	6.85193e-06	4.69204e-05	YBR203W	COS111	Ime4p-dependent
chr02:614638-614676;+	109.295	-0.808712	0.387361	4.38329	0.0362928	0.0715261	YBR203W	COS111	Other
chr02:615822-615844;-	129.356	0.243796	0.37179	0.427378	0.513278	0.618468	YBR204C	LDH1	Other
chr02:615993-616012;-	141.841	-0.00764011	0.340697	0.000504702	0.982077	0.988202	YBR204C	LDH1	Other
chr02:618452-618467;+	270.069	0.468615	0.457377	1.05547	0.304251	0.408716	YBR207W	FTH1	Other
chr02:618488-618506;+	248.523	-0.145217	0.374466	0.15246	0.696195	0.775551	YBR207W	FTH1	Other
chr02:618513-618527;+	262.949	-1.05788	0.363152	9.4155	0.00215159	0.0067041	YBR207W	FTH1	Other
chr02:618565-618592;+	349.345	-1.38201	0.320848	20.7114	5.33981e-06	3.77635e-05	YBR207W	FTH1	Ime4p-dependent
chr02:618645-618668;+	353.284	-0.276648	0.336022	0.676774	0.4107	0.520497	YBR207W	FTH1	Other
chr02:625124-625149;-	146.102	-0.542194	0.441603	1.58628	0.207859	0.300975	YBR208C	DUR1%2C2	Other
chr02:625162-625180;-	147.394	-0.802954	0.447518	3.51013	0.0609946	0.10988	YBR208C	DUR1%2C2	Other
chr02:625191-625225;-	167.012	-0.978283	0.391639	6.96338	0.00831949	0.0210676	YBR208C	DUR1%2C2	Other
chr02:625244-625258;-	176.104	-1.55572	0.42761	16.3273	5.32917e-05	0.000279649	YBR208C	DUR1%2C2	Ime4p-dependent
chr02:625264-625344;-	311.508	-1.93128	0.292064	55.766	8.16328e-14	3.50028e-12	YBR208C	DUR1%2C2	Ime4p-dependent
chr02:632925-632973;+	294.203	-0.13786	0.309283	0.197942	0.656387	0.742501	YBR212W	NGR1	Other
chr02:632979-633008;+	244.192	-0.302786	0.372552	0.653681	0.4188	0.528323	YBR212W	NGR1	Other
chr02:633147-633315;+	843.571	-0.398629	0.236068	2.84735	0.0915244	0.153707	YBR212W	NGR1	Other
chr02:635479-635513;+	174.092	0.813187	0.3314	6.40325	0.0113911	0.027479	YBR214W	SDS24	Other
chr02:635576-635662;+	273.001	0.0326448	0.232665	0.0196373	0.888555	0.922473	YBR214W	SDS24	Other
chr02:636023-636050;+	155.628	0.0298436	0.333716	0.00800334	0.928715	0.951942	YBR214W	SDS24	Other
chr02:636306-636356;+	188.859	-1.20191	0.277235	19.2523	1.14532e-05	7.27793e-05	YBR214W	SDS24	Ime4p-dependent
chr02:638105-638123;+	117.618	-1.24208	0.366362	12.5599	0.000394121	0.00156188	YBR215W	HPC2	Other
chr02:638150-638200;+	187.377	-1.02695	0.259461	16.5605	4.71215e-05	0.000251007	YBR215W	HPC2	Ime4p-dependent
chr02:641287-641317;+	47.3316	-1.82062	0.780637	7.1884	0.00733763	0.0189287	YBR217W	ATG12	Other
chr02:642611-642624;-	156.432	-3.02424	0.626561	38.4442	5.63404e-10	1.17353e-08	YBR218C	PYC2	Ime4p-dependent
chr02:642660-642734;-	423.482	-2.30896	0.287646	71.3749	2.95409e-17	2.28618e-15	YBR218C	PYC2	Ime4p-dependent
chr02:644558-644585;-	170.104	-0.665464	0.366341	3.42595	0.0641792	0.114555	YBR218C	PYC2	Other
chr02:644613-644646;-	154.793	-2.06847	0.512842	20.9752	4.65265e-06	3.35774e-05	YBR218C	PYC2	Ime4p-dependent
chr02:645526-645560;-	163.167	-0.835017	0.392776	4.7761	0.0288574	0.0589977	YBR218C	PYC2	Other
chr02:648335-648350;-	553.985	0.897215	0.461038	3.77466	0.0520344	0.0963649	YBR221C	PDB1	Other
chr02:648575-648621;-	795.986	-0.023802	0.281678	0.00712189	0.932745	0.954843	YBR221C	PDB1	Other
chr02:648633-648694;-	957.092	-0.31021	0.294703	1.10827	0.292457	0.396285	YBR221C	PDB1	Other
chr02:648820-648834;-	556.571	0.26784	0.346916	0.589385	0.442657	0.551381	YBR221C	PDB1	Other
chr02:648871-648887;-	626.464	1.10049	0.257008	18.2265	1.96133e-05	0.000116906	YBR221C	PDB1	Other
chr02:649252-649265;-	582.927	1.0368	0.259026	15.8873	6.72283e-05	0.000342584	YBR221C	PDB1	Other
chr02:649269-649299;-	679.726	0.464885	0.253276	3.33404	0.0678602	0.119689	YBR221C	PDB1	Other
chr02:649375-649395;-	533.694	0.227351	0.305791	0.547578	0.459309	0.567445	YBR221C	PDB1	Other
chr02:649481-649537;-	785.496	0.404616	0.20563	3.84775	0.0498127	0.0928472	YBR221C	PDB1	Other
chr02:649559-649642;-	990.632	0.12592	0.179995	0.488029	0.484808	0.592259	YBR221C	PDB1	Other
chr02:656917-656968;-	61.0798	-2.91008	0.759856	24.5713	7.16111e-07	6.6634e-06	YBR227C	MCX1	Ime4p-dependent
chr02:659747-659762;-	74.6289	-2.32088	0.529797	23.7017	1.12485e-06	9.8153e-06	YBR229C	ROT2	Ime4p-dependent
chr02:662755-662799;-	1701.99	1.26312	0.12805	96.8531	7.46648e-23	1.3936e-20	YBR230C	OM14	Other
chr02:662923-662949;-	958.594	0.923849	0.147618	38.4844	5.51925e-10	1.15468e-08	YBR230C	OM14	Other
chr02:662997-663023;-	870.131	0.785706	0.143995	28.8973	7.63182e-08	9.18424e-07	YBR230C	OM14	Other
chr02:663113-663189;-	1561.7	0.649535	0.270811	5.74616	0.0165247	0.0373277	YBR230C	OM14	Other
chr02:663584-663631;+	74.8873	0.094553	0.376362	0.0626844	0.802302	0.859007	YBR230W-A	YBR230W-A	Other
chr02:665466-665492;-	74.3987	-1.46137	0.474891	11.1921	0.000821441	0.00295626	YBR231C	SWC5	Other
chr02:665551-665572;-	83.6368	-0.279284	0.371473	0.574049	0.448655	0.557611	YBR231C	SWC5	Other
chr02:665602-665630;-	66.0058	-0.196944	0.437011	0.205126	0.650614	0.7379	YBR231C	SWC5	Other
chr02:666112-666158;-	119.958	-0.161986	0.298316	0.297045	0.585741	0.682957	YBR231C	SWC5	Other
chr02:666286-666312;-	84.7571	0.351154	0.354386	0.973906	0.323708	0.428743	YBR231C	SWC5	Other
chr02:666730-666767;+	84.564	0.624384	0.438727	1.98877	0.158469	0.242497	YBR233W	PBP2	Other
chr02:667386-667414;+	92.5474	0.723469	0.407128	3.10563	0.078022	0.134741	YBR233W	PBP2	Other
chr02:667921-667998;+	167.569	0.811968	0.344176	5.59472	0.0180147	0.0401502	YBR233W	PBP2	Other
chr02:668358-668408;+	73.486	0.982332	0.362899	7.29536	0.00691331	0.0179901	YBR233W-A	DAD3	Other
chr02:673454-673504;+	120.043	-0.685491	0.443828	2.52403	0.112124	0.182289	YBR235W	YBR235W	Other
chr02:675432-675465;+	99.0371	0.519078	0.45595	1.25963	0.261722	0.361816	YBR237W	PRP5	Other
chr02:677532-677549;+	128.886	1.66678	0.345897	23.6221	1.17234e-06	1.0145e-05	YBR237W	PRP5	Other
chr02:677628-677648;+	147.689	0.891971	0.305105	8.30725	0.00394871	0.0111735	YBR237W	PRP5	Other
chr02:686277-686306;-	166.403	0.351933	0.329212	1.16469	0.280495	0.38335	YBR241C	YBR241C	Other
chr02:686438-686486;-	198.678	-0.0154621	0.286356	0.00290389	0.957025	0.972347	YBR241C	YBR241C	Other
chr02:686799-686837;-	203.529	0.641408	0.288638	5.14634	0.0232954	0.0497083	YBR241C	YBR241C	Other
chr02:688329-688357;+	176.039	-2.90204	0.45438	70.8109	3.93166e-17	3.01818e-15	YBR242W	YBR242W	Ime4p-dependent
chr02:688359-688376;+	118.443	-2.36172	0.50779	32.841	1.00014e-08	1.53307e-07	YBR242W	YBR242W	Ime4p-dependent
chr02:688382-688403;+	193.513	-1.92076	0.326653	46.3639	9.82075e-12	2.95834e-10	YBR242W	YBR242W	Ime4p-dependent
chr02:688475-688488;+	111.462	-1.22855	0.390577	11.6319	0.00064831	0.00240407	YBR242W	YBR242W	Other
chr02:688703-688722;-	107.346	-2.24413	0.532061	23.6785	1.13846e-06	9.90585e-06	YBR243C	ALG7	Ime4p-dependent
chr02:688746-688777;-	137.592	-1.57919	0.370437	20.9975	4.59885e-06	3.32143e-05	YBR243C	ALG7	Ime4p-dependent
chr02:688807-688834;-	114.736	-1.51258	0.437165	13.7383	0.000210131	0.000907961	YBR243C	ALG7	Ime4p-dependent
chr02:688909-688940;-	129.49	0.345331	0.346335	0.994749	0.318584	0.423489	YBR243C	ALG7	Other
chr02:689061-689095;-	131.149	0.29852	0.332861	0.805895	0.369337	0.477419	YBR243C	ALG7	Other
chr02:689168-689186;-	122.305	-0.052716	0.359545	0.0215071	0.883406	0.919534	YBR243C	ALG7	Other
chr02:691685-691714;-	141.651	-0.695944	0.31255	5.04097	0.0247546	0.052098	YBR245C	YBR245C	Other
chr02:700070-700121;-	117.214	1.02927	0.34641	8.38065	0.00379236	0.0108243	YBR249C	ARO4	Other
chr02:700958-701015;-	105.425	0.576689	0.398949	1.99825	0.157481	0.241434	YBR249C	ARO4	Other
chr02:702429-702463;+	203.082	2.93533	1.07718	7.1478	0.00750559	0.0193097	YBR250W	SPO23	Other
chr02:702589-702620;+	165.129	1.9902	0.850204	4.55938	0.0327388	0.0656501	YBR250W	SPO23	Other
chr02:702973-703024;+	265.546	2.48632	1.20159	4.17874	0.040934	0.0789246	YBR250W	SPO23	Other
chr02:703111-703128;+	147.353	1.73395	0.942317	2.65074	0.103502	0.170371	YBR250W	SPO23	Other
chr02:703331-703364;+	171.793	0.310352	1.09681	0.0754423	0.783572	0.844618	YBR250W	SPO23	Other
chr02:703427-703443;+	152.372	2.1155	0.837062	4.79695	0.0285102	0.0584511	YBR250W	SPO23	Other
chr02:709886-709901;-	103.548	1.25297	0.399158	9.41958	0.00214681	0.00669576	YBR255C-A	YBR255C-A	Other
chr02:709947-709965;-	105.894	1.23445	0.397029	9.38713	0.00218514	0.00679306	YBR255C-A	YBR255C-A	Other
chr02:710004-710036;-	131.921	1.34037	0.34991	14.1529	0.00016854	0.000756455	YBR255C-A	YBR255C-A	Other
chr02:710644-710683;-	191.378	0.183578	0.293448	0.388288	0.533201	0.636633	YBR256C	RIB5	Other
chr02:710708-710738;-	211.932	0.306355	0.264757	1.32919	0.248949	0.347012	YBR256C	RIB5	Other
chr02:710947-710966;-	149.343	1.0338	0.340767	9.15524	0.00248007	0.00756902	YBR256C	RIB5	Other
chr02:711093-711118;-	155.141	0.477927	0.326803	2.10816	0.146515	0.227567	YBR256C	RIB5	Other
chr02:711233-711249;-	109.377	-0.0902571	0.474995	0.0363021	0.848893	0.89328	YBR256C	RIB5	Other
chr02:712464-712483;+	293.643	-0.877775	0.26541	12.0134	0.000528189	0.00202327	YBR257W	POP4	Other
chr02:712519-712653;+	1595.38	-2.15073	0.238727	81.5857	1.6782e-19	1.83266e-17	YBR257W	POP4	Ime4p-dependent
chr02:712656-712674;+	311.17	-2.79492	0.405959	79.0325	6.10955e-19	6.058e-17	YBR257W	POP4	Ime4p-dependent
chr02:712682-712700;+	312.993	-1.34895	0.278871	27.8453	1.31415e-07	1.48568e-06	YBR257W	POP4	Ime4p-dependent
chr02:712728-712746;+	324.011	-1.29748	0.273159	26.4707	2.67561e-07	2.75045e-06	YBR257W	POP4	Ime4p-dependent
chr02:716059-716078;-	51.6845	-3.38741	1.0551	20.2137	6.92561e-06	4.72241e-05	YBR260C	RGD1	Ime4p-dependent
chr02:716088-716118;-	101.002	-2.64072	0.511879	41.1496	1.41014e-10	3.35579e-09	YBR260C	RGD1	Ime4p-dependent
chr02:718890-718914;-	85.968	-1.12285	0.364503	9.88493	0.00166638	0.00538434	YBR262C	AIM5	Other
chr02:718917-718946;-	108.533	-1.32207	0.334735	16.4247	5.06219e-05	0.000267112	YBR262C	AIM5	Ime4p-dependent
chr02:719878-719915;+	117.678	0.186684	0.393898	0.223208	0.636606	0.726166	YBR263W	SHM1	Other
chr02:719935-720022;+	151.381	0.389838	0.330084	1.38142	0.23986	0.337207	YBR263W	SHM1	Other
chr02:720357-720394;+	132.362	1.30534	0.363445	13.2836	0.000267739	0.00112224	YBR263W	SHM1	Other
chr02:721134-721180;-	55.7766	-0.496693	0.464133	1.17718	0.277931	0.38054	YBR264C	YPT10	Other
chr02:722775-722829;+	212.292	-0.297374	0.229384	1.69833	0.192506	0.283269	YBR265W	TSC10	Other
chr02:724568-724587;+	58.8395	0.159877	0.499142	0.101122	0.750488	0.81963	YBR268W	MRPL37	Other
chr02:724693-724755;+	173.7	0.447721	0.380716	1.3746	0.241022	0.338541	YBR268W	MRPL37	Other
chr02:725695-725719;-	203.357	0.0254911	0.321994	0.00622211	0.937128	0.95769	YBR269C	FMP21	Other
chr02:725723-725736;-	154.859	0.771036	0.32449	5.53465	0.0186435	0.0413483	YBR269C	FMP21	Other
chr02:729697-729716;-	104.877	-0.381624	0.4332	0.792763	0.373266	0.481779	YBR272C	HSM3	Other
chr02:731235-731275;-	79.0103	-2.15113	0.474004	23.4028	1.3139e-06	1.11471e-05	YBR273C	UBX7	Ime4p-dependent
chr02:732158-732235;-	113.444	-0.177486	0.350573	0.254505	0.61392	0.707344	YBR273C	UBX7	Other
chr02:734555-734579;-	144.069	-0.954384	0.451769	4.65389	0.0309832	0.0626594	YBR275C	RIF1	Other
chr02:734593-734613;-	154.475	-1.26752	0.42093	9.76557	0.00177811	0.00568552	YBR275C	RIF1	Other
chr02:734618-734642;-	207.818	-1.15778	0.352594	11.1653	0.000833413	0.00299143	YBR275C	RIF1	Other
chr02:743863-743915;+	226.213	1.20676	0.229183	28.5572	9.09689e-08	1.0717e-06	YBR278W	DPB3	Other
chr02:744032-744062;+	97.6142	0.467717	0.329736	2.00696	0.156579	0.240282	YBR278W	DPB3	Other
chr02:745559-745615;+	136.403	-0.248697	0.353002	0.502585	0.478366	0.586573	YBR279W	PAF1	Other
chr02:747600-747613;-	274.128	-0.0627841	0.26105	0.0580165	0.809659	0.863933	YBR280C	SAF1	Other
chr02:747668-747684;-	315.804	-0.833855	0.245162	12.3581	0.000439075	0.00172069	YBR280C	SAF1	Other
chr02:747732-747772;-	570.722	-2.67502	0.234793	180.516	3.73973e-41	8.89962e-38	YBR280C	SAF1	Ime4p-dependent
chr02:747774-747788;-	379.089	-1.29025	0.503471	6.5603	0.0104279	0.0255701	YBR280C	SAF1	Other
chr02:747793-747807;-	285.421	-1.27779	0.289566	22.1521	2.51881e-06	1.94963e-05	YBR280C	SAF1	Ime4p-dependent
chr02:748284-748310;-	150.073	0.116829	0.39128	0.0888156	0.765688	0.831746	YBR281C	DUG2	Other
chr02:748423-748443;-	162.246	-0.7225	0.386962	3.68442	0.0549229	0.100773	YBR281C	DUG2	Other
chr02:749099-749154;-	180.482	0.0962014	0.319267	0.0905151	0.763523	0.830341	YBR281C	DUG2	Other
chr02:749575-749606;-	176.205	0.819825	0.331785	6.07971	0.0136743	0.0320369	YBR281C	DUG2	Other
chr02:751556-751584;+	81.8441	1.16223	0.374288	9.44232	0.00212036	0.00662846	YBR282W	MRPL27	Other
chr02:752095-752125;-	197.168	-0.0586577	0.347409	0.0286836	0.865512	0.906459	YBR283C	SSH1	Other
chr02:752602-752649;-	196.064	0.538739	0.326323	2.62012	0.105516	0.173084	YBR283C	SSH1	Other
chr02:752958-752980;-	167.026	-0.94398	0.844029	1.24304	0.264886	0.365481	YBR283C	SSH1	Other
chr02:753042-753061;-	145.539	-1.20119	0.778938	2.87805	0.0897945	0.151391	YBR283C	SSH1	Other
chr02:757254-757294;+	253.857	0.923614	0.380025	5.81434	0.015896	0.0361477	YBR285W	YBR285W	Other
chr02:757490-757657;+	898.579	-0.0196494	0.357193	0.00302422	0.956144	0.971794	YBR285W	YBR285W	Other
chr02:758768-758806;+	564.64	-0.992659	0.175106	33.8401	5.98338e-09	9.6209e-08	YBR286W	APE3	Other
chr02:758989-759005;+	289.943	-0.635572	0.302272	4.58285	0.0322936	0.064935	YBR286W	APE3	Other
chr02:759074-759103;+	578.09	-1.1938	0.183121	45.132	1.84187e-11	5.2651e-10	YBR286W	APE3	Ime4p-dependent
chr02:759115-759142;+	459.75	-0.427437	0.19591	4.83254	0.0279275	0.0574668	YBR286W	APE3	Other
chr02:760228-760282;+	129.463	0.825176	0.330998	6.23755	0.012507	0.0296966	YBR287W	YBR287W	Other
chr02:760878-760935;+	143.023	-0.38589	0.314161	1.54594	0.213735	0.307473	YBR287W	YBR287W	Other
chr02:764910-765000;+	107.24	-0.563575	0.377301	2.30809	0.128702	0.204152	YBR289W	SNF5	Other
chr02:766029-766053;+	128.49	-0.045222	0.329957	0.0188137	0.890902	0.924506	YBR290W	BSD2	Other
chr02:766160-766177;+	151.762	-0.872776	0.318486	7.9359	0.00484634	0.0132412	YBR290W	BSD2	Other
chr02:766226-766245;+	142.228	-0.0527919	0.310427	0.0289749	0.864837	0.905852	YBR290W	BSD2	Other
chr02:766857-766898;+	143.65	0.0477077	0.307393	0.0240864	0.876665	0.914973	YBR290W	BSD2	Other
chr02:775054-775083;+	67.6814	0.0767666	0.457514	0.0280019	0.867104	0.907428	YBR294W	SUL1	Other
chr02:777525-777542;+	100.135	-2.13752	0.795751	9.58554	0.00196116	0.00618154	YBR295W	PCA1	Other
chr02:780026-780076;-	495.215	-2.31583	0.480455	23.3238	1.36897e-06	1.1573e-05	YBR296C	PHO89	Ime4p-dependent
chr02:780738-780793;-	397.933	0.235666	0.401819	0.34166	0.558872	0.659956	YBR296C	PHO89	Other
chr02:780941-780981;-	379.217	0.887322	0.37103	5.71364	0.0168336	0.0379174	YBR296C	PHO89	Other
chr02:785018-785050;+	92.5346	-2.10751	0.627449	16.1705	5.78898e-05	0.000300138	YBR297W	MAL33	Ime4p-dependent
chr02:785057-785076;+	83.8001	-2.13883	0.686173	14.0314	0.000179781	0.000798198	YBR297W	MAL33	Ime4p-dependent
chr02:785080-785096;+	85.9201	-1.6788	0.590083	10.5328	0.00117272	0.00400111	YBR297W	MAL33	Other
chr02:785169-785189;+	77.6485	0.455292	0.441511	1.03576	0.30881	0.413266	YBR297W	MAL33	Other
chr03:37751-37836;+	89.5934	0.655146	0.361143	3.07227	0.079638	0.137083	YCL063W	VAC17	Other
chr03:41904-41957;-	83.7272	0.589077	0.39432	2.19311	0.138629	0.217363	YCL059C	KRR1	Other
chr03:43692-43768;-	231.308	0.462051	0.230328	3.9522	0.0468101	0.0883923	YCL057C-A	MIC10	Other
chr03:44744-44769;+	308.178	0.287469	0.262371	1.17718	0.277931	0.38054	YCL057W	PRD1	Other
chr03:44882-44938;+	332.531	-0.322045	0.269725	1.46632	0.225926	0.321272	YCL057W	PRD1	Other
chr03:45043-45056;+	253.426	-0.171136	0.343909	0.252054	0.615632	0.708542	YCL057W	PRD1	Other
chr03:45069-45140;+	654.451	-1.31762	0.280585	22.6658	1.92766e-06	1.54847e-05	YCL057W	PRD1	Ime4p-dependent
chr03:45907-45953;+	328.653	-0.822911	0.296168	8.42921	0.0036924	0.0105899	YCL057W	PRD1	Other
chr03:46515-46565;-	132.473	0.680498	0.311596	4.89022	0.0270092	0.0559158	YCL056C	PEX34	Other
chr03:48018-48048;+	149.356	-0.525391	0.387428	1.88752	0.169482	0.255633	YCL055W	KAR4	Other
chr03:48088-48108;+	119.794	-0.634404	0.446707	2.12252	0.145148	0.225872	YCL055W	KAR4	Other
chr03:48112-48128;+	113.687	-1.40426	0.52641	8.36298	0.00382942	0.0108975	YCL055W	KAR4	Other
chr03:48134-48154;+	167.108	-2.14286	0.459396	28.0288	1.19525e-07	1.36125e-06	YCL055W	KAR4	Ime4p-dependent
chr03:53711-53742;-	179.283	0.730084	0.316544	5.2999	0.0213267	0.0462329	YCL052C	PBN1	Other
chr03:54077-54111;-	153.968	-0.0130893	0.357473	0.0013437	0.970759	0.981535	YCL052C	PBN1	Other
chr03:54168-54214;-	167.959	-0.367199	0.34709	1.14019	0.285613	0.388758	YCL052C	PBN1	Other
chr03:54233-54250;-	130.921	0.294409	0.410804	0.508715	0.475696	0.5839	YCL052C	PBN1	Other
chr03:54397-54419;-	143.62	1.27076	0.375486	11.5698	0.000670325	0.00247511	YCL052C	PBN1	Other
chr03:54465-54499;-	150.739	0.247984	0.376567	0.429884	0.512046	0.617373	YCL052C	PBN1	Other
chr03:59510-59547;-	66.9393	-2.27081	0.608346	18.5612	1.64534e-05	9.98215e-05	YCL049C	YCL049C	Ime4p-dependent
chr03:59632-59660;-	92.2395	-0.795453	0.383768	4.48645	0.0341646	0.0678942	YCL049C	YCL049C	Other
chr03:59666-59694;-	72.1571	-1.13736	0.474426	6.25017	0.0124181	0.0295022	YCL049C	YCL049C	Other
chr03:65883-65905;-	113.178	-1.93069	0.520073	18.5106	1.68958e-05	0.00010218	YCL045C	EMC1	Ime4p-dependent
chr03:66092-66117;-	99.2446	-2.78357	0.753402	23.007	1.6141e-06	1.33373e-05	YCL045C	EMC1	Ime4p-dependent
chr03:67812-67860;-	57.35	0.324354	0.503661	0.408799	0.52258	0.62761	YCL044C	MGR1	Other
chr03:68249-68281;-	614.814	0.958885	0.211562	19.812	8.54445e-06	5.68376e-05	YCL043C	PDI1	Other
chr03:68359-68404;-	742.115	0.305686	0.334196	0.833672	0.361213	0.4687	YCL043C	PDI1	Other
chr03:68411-68461;-	803.67	0.498728	0.164862	8.94979	0.00277502	0.00831719	YCL043C	PDI1	Other
chr03:68471-68511;-	753.203	0.0673105	0.193494	0.120713	0.728263	0.801253	YCL043C	PDI1	Other
chr03:68560-68584;-	559.914	-0.350836	0.264792	1.81882	0.177454	0.265595	YCL043C	PDI1	Other
chr03:69144-69159;-	593.234	0.713296	0.214034	10.7173	0.0010614	0.003674	YCL043C	PDI1	Other
chr03:69312-69327;-	540.411	0.942621	0.247898	13.9715	0.000185607	0.000818338	YCL043C	PDI1	Other
chr03:69462-69478;-	547.409	0.603323	0.243722	5.92855	0.0148975	0.0343531	YCL043C	PDI1	Other
chr03:71458-71479;+	139.779	0.836334	0.341471	5.84496	0.0156218	0.0356396	YCL040W	GLK1	Other
chr03:71542-71559;+	128.565	0.681358	0.388387	2.9853	0.0840237	0.143183	YCL040W	GLK1	Other
chr03:71584-71611;+	134.954	0.752707	0.36083	4.22742	0.0397758	0.0770348	YCL040W	GLK1	Other
chr03:71874-71890;+	116.087	-0.0437759	0.434733	0.0101857	0.91961	0.945302	YCL040W	GLK1	Other
chr03:72933-72949;+	158.644	-1.56872	0.309798	29.6399	5.20231e-08	6.61158e-07	YCL039W	GID7	Ime4p-dependent
chr03:72997-73018;+	79.6499	-1.66697	0.578153	9.96533	0.00159515	0.00519121	YCL039W	GID7	Other
chr03:74497-74545;-	165.382	1.22475	0.33316	13.4772	0.000241485	0.00102575	YCL038C	ATG22	Other
chr03:75346-75382;-	134.379	0.919282	0.424446	4.60793	0.0318243	0.064127	YCL038C	ATG22	Other
chr03:80344-80385;-	329.713	1.0172	0.197229	26.7338	2.33504e-07	2.45604e-06	YCL035C	GRX1	Other
chr03:80550-80585;-	146.753	-0.189945	0.30757	0.384529	0.53519	0.638405	YCL035C	GRX1	Other
chr03:80614-80654;-	186.69	0.663304	0.25695	6.61152	0.0101321	0.0249155	YCL035C	GRX1	Other
chr03:81226-81247;+	123.985	1.04222	0.327041	10.1801	0.00141961	0.00470683	YCL034W	LSB5	Other
chr03:81540-81557;+	102.355	1.41275	0.36317	15.5191	8.16766e-05	0.000405309	YCL034W	LSB5	Other
chr03:81778-81791;+	84.3101	0.175275	0.422653	0.170343	0.679807	0.761019	YCL034W	LSB5	Other
chr03:81878-81912;+	120.227	-0.835421	0.357403	5.85472	0.0155354	0.0355057	YCL034W	LSB5	Other
chr03:81926-81951;+	107.409	-0.826414	0.386084	4.91344	0.0266486	0.0553618	YCL034W	LSB5	Other
chr03:82025-82049;+	176.025	0.0621865	0.274459	0.0513996	0.820646	0.872422	YCL034W	LSB5	Other
chr03:83133-83214;+	119.108	0.67596	0.301801	5.01167	0.0251769	0.0527663	YCL032W	STE50	Other
chr03:83428-83467;+	91.8635	-0.0457411	0.37077	0.0152203	0.901813	0.931867	YCL032W	STE50	Other
chr03:84529-84562;-	70.0172	-0.134763	0.454571	0.0885826	0.765987	0.831886	YCL031C	RRP7	Other
chr03:90323-90358;+	100.058	-1.20082	0.383415	9.83873	0.00170875	0.00550443	YCL028W	RNQ1	Other
chr03:90366-90392;+	102.239	-0.744768	0.36638	4.07013	0.0436479	0.083347	YCL028W	RNQ1	Other
chr03:90755-90771;+	95.5244	-0.779369	0.384333	4.05198	0.0441196	0.0841464	YCL028W	RNQ1	Other
chr03:95409-95458;-	217.852	-0.720003	0.364199	4.11383	0.042534	0.0816787	YCL025C	AGP1	Other
chr03:95902-95941;-	169.053	-0.258496	0.44738	0.340254	0.559683	0.660749	YCL025C	AGP1	Other
chr03:96109-96156;-	202.292	0.916814	0.360193	6.38819	0.0114882	0.0276712	YCL025C	AGP1	Other
chr03:96240-96278;-	176.327	0.847245	0.397399	4.45677	0.0347632	0.068911	YCL025C	AGP1	Other
chr03:96610-96649;-	190.364	0.893191	0.374421	5.6064	0.017895	0.0399397	YCL025C	AGP1	Other
chr03:97172-97185;-	182.236	1.37961	0.381888	13.1059	0.00029437	0.00121884	YCL025C	AGP1	Other
chr03:103061-103089;+	70.6092	-1.27124	0.838564	2.5312	0.111615	0.181587	YCL021W-A	YCL021W-A	Other
chr03:103137-103160;+	88.2719	-0.591406	0.696854	0.737731	0.390389	0.499959	YCL021W-A	YCL021W-A	Other
chr03:103263-103339;+	133.062	-0.145283	0.825283	0.0309293	0.860398	0.902655	YCL021W-A	YCL021W-A	Other
chr03:105690-105735;+	423.952	0.762181	0.26599	8.44421	0.00366208	0.0105125	YCL018W	LEU2	Other
chr03:106311-106356;+	345.934	0.84502	0.302638	8.08535	0.00446246	0.0123705	YCL018W	LEU2	Other
chr03:106465-106524;+	288.11	0.24545	0.389125	0.401567	0.526281	0.630941	YCL018W	LEU2	Other
chr03:106696-106767;+	318.993	-2.804	0.317202	87.5493	8.2204e-21	1.11786e-18	YCL018W	LEU2	Ime4p-dependent
chr03:108971-108994;-	62.2443	-0.460518	0.429076	1.18051	0.277252	0.380119	YCL016C	DCC1	Other
chr03:115661-115719;-	155.514	0.333612	0.301407	1.22527	0.268329	0.369481	YCL012C	YCL012C	Other
chr03:115814-115843;-	87.1945	0.0850528	0.402131	0.0447647	0.832437	0.881911	YCL012C	YCL012C	Other
chr03:115871-115900;-	93.1581	-0.593147	0.383885	2.42191	0.119649	0.19229	YCL012C	YCL012C	Other
chr03:118898-118956;-	279.069	-0.988291	0.366539	7.26506	0.00703089	0.0182561	YCL009C	ILV6	Other
chr03:118990-119014;-	158.507	-0.574565	0.739614	0.600323	0.438455	0.547005	YCL009C	ILV6	Other
chr03:119338-119360;-	235.296	0.445055	0.63981	0.483152	0.486998	0.594249	YCL009C	ILV6	Other
chr03:121688-121732;+	103.171	0.123859	0.313358	0.155257	0.693561	0.773138	YCL005W-A	VMA9	Other
chr03:122826-122875;+	61.1977	-0.622717	0.573414	1.28247	0.25744	0.356914	YCL005W	LDB16	Other
chr03:124969-125009;+	39.3307	-1.65529	0.655311	7.88177	0.00499355	0.0135927	YCL004W	PGS1	Other
chr03:126298-126325;+	117.859	1.84098	0.349622	28.7915	8.0605e-08	9.64026e-07	YCL001W	RER1	Other
chr03:126441-126476;+	137.739	0.591286	0.302416	3.75652	0.0526021	0.0971516	YCL001W	RER1	Other
chr03:126615-126644;+	92.4713	1.22838	0.398731	9.39182	0.00217955	0.00678012	YCL001W	RER1	Other
chr03:132021-132047;-	194.619	0.930835	0.485196	3.6465	0.0561871	0.102598	YCR002C	CDC10	Other
chr03:132085-132114;-	208.013	0.615151	0.417239	2.12634	0.144786	0.225494	YCR002C	CDC10	Other
chr03:132227-132249;-	150.94	1.52481	0.445031	11.3468	0.000755773	0.00274483	YCR002C	CDC10	Other
chr03:132464-132521;-	206.98	1.24075	0.385526	10.176	0.00142283	0.00471258	YCR002C	CDC10	Other
chr03:132628-132669;-	192.655	2.11779	0.443228	22.4054	2.20758e-06	1.7497e-05	YCR002C	CDC10	Other
chr03:133800-133890;-	565.505	-1.6366	0.215079	58.4262	2.11065e-14	9.94618e-13	YCR004C	YCP4	Ime4p-dependent
chr03:133895-133910;-	207.69	-0.586606	0.330364	3.13827	0.076475	0.132526	YCR004C	YCP4	Other
chr03:134037-134069;-	245.157	-0.129474	0.295432	0.192141	0.661141	0.74653	YCR004C	YCP4	Other
chr03:135185-135275;-	7145.58	0.280146	0.184748	2.30391	0.129049	0.204668	YCR005C	CIT2	Other
chr03:135373-135412;-	4193.54	-0.0606411	0.174413	0.120703	0.728274	0.801253	YCR005C	CIT2	Other
chr03:135656-135671;-	4100.37	1.15161	0.141387	66.8845	2.87884e-16	1.97149e-14	YCR005C	CIT2	Other
chr03:135866-135905;-	4601.9	-0.0327276	0.191056	0.0292965	0.864096	0.905617	YCR005C	CIT2	Other
chr03:135986-136013;-	4167.66	0.376816	0.157384	5.73543	0.016626	0.0375209	YCR005C	CIT2	Other
chr03:136345-136360;-	4155.07	0.821695	0.227417	13.0764	0.000299036	0.00123387	YCR005C	CIT2	Other
chr03:136371-136394;-	4919.51	0.708823	0.3563	3.96418	0.0464783	0.0879751	YCR005C	CIT2	Other
chr03:136396-136410;-	4480.17	0.950106	0.214754	19.6133	9.48065e-06	6.17385e-05	YCR005C	CIT2	Other
chr03:136425-136468;-	7026.33	0.707539	0.195654	13.1084	0.000293976	0.00121774	YCR005C	CIT2	Other
chr03:143829-143849;+	156.273	-1.63521	0.400117	20.159	7.12645e-06	4.84894e-05	YCR008W	SAT4	Ime4p-dependent
chr03:143882-143899;+	131.06	-1.44095	0.46082	11.4591	0.000711456	0.00260876	YCR008W	SAT4	Other
chr03:143990-144004;+	235.521	-1.31199	0.280953	24.3418	8.06685e-07	7.40486e-06	YCR008W	SAT4	Ime4p-dependent
chr03:144013-144030;+	167.946	-1.65774	0.384444	22.1596	2.50897e-06	1.94952e-05	YCR008W	SAT4	Ime4p-dependent
chr03:144051-144077;+	367.331	-1.06203	0.260777	17.029	3.68136e-05	0.000202776	YCR008W	SAT4	Ime4p-dependent
chr03:144757-144833;-	214.223	-0.965519	0.273337	13.2804	0.000268189	0.00112314	YCR009C	RVS161	Other
chr03:144841-144878;-	99.5537	0.0257785	0.402187	0.00410653	0.948905	0.966676	YCR009C	RVS161	Other
chr03:145116-145169;-	156.386	0.79883	0.294968	7.29908	0.006899	0.0179627	YCR009C	RVS161	Other
chr03:146236-146251;-	11157.4	0.99297	0.13242	56.3642	6.02154e-14	2.65366e-12	YCR010C	ADY2	Other
chr03:146623-146644;-	12563.7	0.973825	0.150349	42.0683	8.81416e-11	2.19639e-09	YCR010C	ADY2	Other
chr03:146704-146718;-	11061.6	1.01701	0.208638	23.8301	1.05225e-06	9.25731e-06	YCR010C	ADY2	Other
chr03:146900-146914;-	11057.7	1.0048	0.151453	44.1145	3.09726e-11	8.44779e-10	YCR010C	ADY2	Other
chr03:146919-146936;-	12705.4	1.07074	0.169527	39.9618	2.58979e-10	5.74644e-09	YCR010C	ADY2	Other
chr03:146950-146964;-	13085.9	1.14908	0.200184	33.0012	9.21043e-09	1.42559e-07	YCR010C	ADY2	Other
chr03:147021-147039;-	13548.5	0.942266	0.200823	22.0608	2.64154e-06	2.03767e-05	YCR010C	ADY2	Other
chr03:147043-147150;-	35353	0.910228	0.220572	17.0677	3.60709e-05	0.000199395	YCR010C	ADY2	Other
chr03:147713-147725;-	322.955	-3.70885	1.17733	9.43809	0.00212524	0.0066372	YCR011C	ADP1	Other
chr03:147952-148001;-	311.75	-0.973838	0.308328	10.2499	0.00136695	0.00456242	YCR011C	ADP1	Other
chr03:148019-148040;-	238.184	-1.23639	0.413502	9.63284	0.00191129	0.0060524	YCR011C	ADP1	Other
chr03:150816-150836;-	295.744	0.596224	0.305915	3.84246	0.0499701	0.0930853	YCR011C	ADP1	Other
chr03:150840-150868;-	645.446	0.914371	0.232998	15.4769	8.35204e-05	0.000412147	YCR011C	ADP1	Other
chr03:151696-151730;+	396.075	0.791011	0.46703	2.89613	0.0887922	0.149914	YCR012W	PGK1	Other
chr03:151767-151831;+	438.479	0.131581	0.432153	0.0924049	0.761142	0.828414	YCR012W	PGK1	Other
chr03:151894-151973;+	462.02	0.196257	0.427116	0.21036	0.646485	0.734267	YCR012W	PGK1	Other
chr03:152449-152489;+	317.766	-0.802204	0.504657	2.50133	0.11375	0.184512	YCR012W	PGK1	Other
chr03:152722-152753;+	346.214	0.268582	0.503935	0.284557	0.59373	0.689654	YCR012W	PGK1	Other
chr03:152849-152893;+	415.386	0.190795	0.706132	0.0731334	0.786828	0.847011	YCR012W	PGK1	Other
chr03:152953-153023;+	561.672	0.795754	0.439252	3.28751	0.0698089	0.122649	YCR012W	PGK1	Other
chr03:158230-158266;+	63.4852	-1.21292	0.533357	6.12653	0.0133168	0.0313303	YCR016W	YCR016W	Other
chr03:172986-173010;+	67.947	-0.539281	0.534985	1.07585	0.299629	0.40399	YCR019W	MAK32	Other
chr03:173014-173043;+	65.3579	-2.07494	0.768523	10.4098	0.0012535	0.00423575	YCR019W	MAK32	Other
chr03:173476-173508;+	60.5696	-1.37947	0.707775	4.65384	0.0309841	0.0626594	YCR019W	MAK32	Other
chr03:179720-179758;-	90.5959	-0.40057	0.439802	0.846554	0.357529	0.464794	YCR023C	YCR023C	Other
chr03:182699-182723;-	686.079	0.816177	0.247985	10.9384	0.000941907	0.00331829	YCR024C-A	PMP1	Other
chr03:182790-182828;-	712.134	0.000129403	0.230661	3.166e-07	0.999551	0.999801	YCR024C-A	PMP1	Other
chr03:182878-182942;-	978.511	0.186397	0.230672	0.6549	0.418366	0.528173	YCR024C-A	PMP1	Other
chr03:183076-183091;-	422.595	0.179831	0.304965	0.346408	0.556154	0.657398	YCR024C-A	PMP1	Other
chr03:183122-183144;-	565.581	0.769175	0.253173	9.35801	0.00222013	0.00688385	YCR024C-A	PMP1	Other
chr03:184106-184142;-	163.52	-1.31648	0.309157	18.0639	2.13616e-05	0.000125675	YCR026C	NPP1	Ime4p-dependent
chr03:189866-189909;-	148.297	-0.990986	0.354599	8.47921	0.00359229	0.0103308	YCR028C	FEN2	Other
chr03:189913-189950;-	130.301	-0.856554	0.411265	4.63523	0.031322	0.0631951	YCR028C	FEN2	Other
chr03:190773-190790;-	130.89	0.560102	0.375927	2.21478	0.136694	0.214774	YCR028C	FEN2	Other
chr03:192004-192020;-	209.815	-0.032404	0.256459	0.0159996	0.899344	0.929821	YCR028C-A	RIM1	Other
chr03:192078-192101;-	365.733	-1.2089	0.208269	36.6026	1.44839e-09	2.75745e-08	YCR028C-A	RIM1	Ime4p-dependent
chr03:198889-198922;-	123.203	-0.985902	1.0418	0.891295	0.345127	0.451272	YCR030C	SYP1	Other
chr03:199796-199853;-	221.024	0.197098	0.251753	0.614607	0.433058	0.541479	YCR030C	SYP1	Other
chr03:200009-200052;-	186.802	-0.103567	0.291178	0.126595	0.721989	0.796824	YCR030C	SYP1	Other
chr03:212985-213021;+	136.244	0.331213	0.392177	0.711707	0.398878	0.508289	YCR033W	SNT1	Other
chr03:214007-214081;+	191.299	1.18646	0.329836	13.227	0.000275938	0.00115081	YCR033W	SNT1	Other
chr03:215909-215952;+	116.116	0.0589404	0.411094	0.0204366	0.886324	0.921061	YCR034W	FEN1	Other
chr03:216116-216143;+	109.275	-0.916986	0.455127	4.3235	0.0375894	0.0735637	YCR034W	FEN1	Other
chr03:216145-216172;+	117.819	-0.165661	0.392096	0.180003	0.67137	0.754697	YCR034W	FEN1	Other
chr03:216462-216500;+	179.894	1.79694	0.327377	32.1742	1.40951e-08	2.103e-07	YCR034W	FEN1	Other
chr03:216935-216952;-	53.1673	-0.522809	0.563485	0.907237	0.340849	0.446968	YCR035C	RRP43	Other
chr03:217041-217110;-	119.532	0.540213	0.288369	3.43665	0.0637647	0.113965	YCR035C	RRP43	Other
chr03:218332-218372;+	77.8696	-1.05471	0.526006	4.5211	0.0334793	0.0668113	YCR036W	RBK1	Other
chr03:218498-218543;+	122.047	-0.921908	0.364709	6.94285	0.00841551	0.0212938	YCR036W	RBK1	Other
chr03:218568-218592;+	83.6925	-0.751539	0.474777	2.69227	0.100836	0.166584	YCR036W	RBK1	Other
chr03:218602-218657;+	131.865	0.75455	0.308839	5.88972	0.0152295	0.0349662	YCR036W	RBK1	Other
chr03:218866-218944;+	130.185	-0.0584425	0.32264	0.0328878	0.856093	0.899067	YCR036W	RBK1	Other
chr03:220316-220400;-	111.245	-1.06171	0.473899	5.67394	0.0172188	0.0386296	YCR037C	PHO87	Other
chr03:221578-221591;-	118.199	0.39751	0.372649	1.12099	0.289705	0.393228	YCR037C	PHO87	Other
chr03:226202-226225;-	81.7587	-0.803289	0.481982	2.87609	0.0899038	0.151548	YCR042C	TAF2	Other
chr03:235890-235941;-	57.8885	0.727496	0.445028	2.67541	0.101909	0.168036	YCR047C	BUD23	Other
chr03:239851-239900;+	104.267	0.224006	0.373155	0.362022	0.547385	0.649777	YCR051W	YCR051W	Other
chr03:240428-240467;+	69.773	-1.22646	0.411557	9.60045	0.00194529	0.0061356	YCR052W	RSC6	Other
chr03:240603-240616;+	57.4444	-1.77829	0.507078	14.5135	0.000139158	0.000636846	YCR052W	RSC6	Ime4p-dependent
chr03:243058-243096;+	139.947	-1.49031	0.386063	17.8535	2.38586e-05	0.000137977	YCR053W	THR4	Ime4p-dependent
chr03:249103-249158;-	56.7734	-0.351826	0.504126	0.489334	0.484224	0.591699	YCR059C	YIH1	Other
chr03:251594-251644;+	111.566	0.82859	0.676603	1.50025	0.220633	0.315441	YCR061W	YCR061W	Other
chr03:252282-252303;+	128.719	1.11741	0.861738	1.69145	0.19341	0.284247	YCR061W	YCR061W	Other
chr03:252869-252900;+	113.098	0.50097	0.710023	0.495337	0.481556	0.589119	YCR061W	YCR061W	Other
chr03:264626-264642;+	88.7685	-2.73485	0.696582	22.7008	1.89292e-06	1.52572e-05	YCR069W	CPR4	Ime4p-dependent
chr03:264654-264683;+	152.163	-2.47259	0.378261	57.6131	3.19097e-14	1.46738e-12	YCR069W	CPR4	Ime4p-dependent
chr03:264688-264712;+	104.461	-1.3034	0.434477	9.8446	0.00170331	0.00548877	YCR069W	CPR4	Other
chr03:265905-265960;-	96.4618	0.997478	0.335451	8.67475	0.00322649	0.00944142	YCR071C	IMG2	Other
chr03:269219-269262;-	51.2907	-2.00852	0.670613	10.4732	0.00121118	0.00412347	YCR073C	SSK22	Other
chr03:274794-274883;+	93.6589	-0.00301699	0.344922	7.64961e-05	0.993022	0.995741	YCR075W-A	EGO2	Other
chr03:275406-275423;-	65.8912	0.230118	0.454143	0.254245	0.614102	0.707351	YCR076C	YCR076C	Other
chr03:278971-279007;+	159.247	0.448085	0.300497	2.22433	0.135851	0.213818	YCR079W	PTC6	Other
chr03:279639-279697;+	174.44	-0.689457	0.296599	5.57513	0.0182174	0.0405355	YCR079W	PTC6	Other
chr03:279717-279747;+	103.801	-1.14903	0.48072	6.28186	0.012198	0.029079	YCR079W	PTC6	Other
chr03:284566-284606;+	408.685	-1.34457	0.22337	36.7841	1.31965e-09	2.53772e-08	YCR082W	AHC2	Ime4p-dependent
chr03:284820-284930;+	1264.98	-2.1932	0.183117	142.84	6.37039e-33	4.66459e-30	YCR082W	AHC2	Ime4p-dependent
chr03:285403-285428;+	78.2506	0.785534	0.424946	3.49556	0.0615335	0.110725	YCR083W	TRX3	Other
chr03:285785-285812;-	145.145	-1.03189	0.376471	7.70644	0.00550243	0.0147335	YCR084C	TUP1	Other
chr03:285815-285906;-	366.751	-1.59557	0.462061	11.768	0.000602585	0.00226362	YCR084C	TUP1	Other
chr03:289269-289283;+	46.0609	-0.000821391	0.593054	1.91377e-06	0.998896	0.999316	YCR086W	CSM1	Other
chr03:289352-289403;+	103.501	-1.24452	0.458039	8.88917	0.00286867	0.0085414	YCR086W	CSM1	Other
chr03:289451-289527;+	124.149	0.140385	0.323976	0.185579	0.666622	0.751134	YCR086W	CSM1	Other
chr03:309816-309879;+	342.441	0.236398	0.409676	0.331045	0.565045	0.665264	YCR093W	CDC39	Other
chr03:309927-310028;+	377.451	-0.979244	0.396278	6.22807	0.0125741	0.0298336	YCR093W	CDC39	Other
chr03:311543-311605;+	359.098	0.0809198	0.370189	0.047707	0.827102	0.877724	YCR093W	CDC39	Other
chr03:312081-312093;+	427.052	1.68933	0.385876	19.5412	9.84507e-06	6.38387e-05	YCR093W	CDC39	Other
chr03:312094-312122;+	341.309	0.364993	0.391283	0.87232	0.350314	0.456987	YCR093W	CDC39	Other
chr04:38762-38777;-	253.303	-1.42567	0.632942	6.03508	0.0140243	0.032712	YDL239C	ADY3	Other
chr04:38825-38858;-	608.144	-1.91238	0.423874	21.4151	3.69846e-06	2.73548e-05	YDL239C	ADY3	Ime4p-dependent
chr04:38859-38872;-	318.688	-0.487437	0.529544	0.851285	0.356189	0.463318	YDL239C	ADY3	Other
chr04:38930-38946;-	323.714	-0.478517	0.517127	0.861504	0.353318	0.460276	YDL239C	ADY3	Other
chr04:38956-38975;-	287.853	-1.00084	0.551655	3.47839	0.0621753	0.111669	YDL239C	ADY3	Other
chr04:40312-40365;-	131.04	-0.4014	0.343525	1.37062	0.241705	0.339299	YDL238C	GUD1	Other
chr04:42744-42770;+	186.135	0.995659	0.295141	12.3499	0.000441004	0.00172683	YDL237W	AIM6	Other
chr04:42820-42881;+	167.774	-0.672274	0.268032	6.25006	0.0124189	0.0295022	YDL237W	AIM6	Other
chr04:42931-42947;+	93.7367	-1.73942	0.408324	19.6715	9.19619e-06	6.02882e-05	YDL237W	AIM6	Ime4p-dependent
chr04:44476-44496;-	64.758	0.0130102	0.442619	0.000863007	0.976564	0.984356	YDL235C	YPD1	Other
chr04:44553-44610;-	123.096	-1.70243	0.36194	27.3679	1.68204e-07	1.85102e-06	YDL235C	YPD1	Ime4p-dependent
chr04:44620-44646;-	83.0619	-0.287673	0.364966	0.632544	0.426424	0.535223	YDL235C	YPD1	Other
chr04:45209-45255;-	145.32	-0.195981	0.404594	0.236289	0.626899	0.717846	YDL234C	GYP7	Other
chr04:45605-45677;-	194.929	-0.165507	0.288681	0.330316	0.565473	0.665686	YDL234C	GYP7	Other
chr04:45908-45933;-	173.836	0.54568	0.318518	2.94279	0.0862614	0.146185	YDL234C	GYP7	Other
chr04:45971-46003;-	196.825	1.02717	0.287529	13.1822	0.000282623	0.00117686	YDL234C	GYP7	Other
chr04:46068-46145;-	228.654	0.0915812	0.248781	0.135176	0.713124	0.789237	YDL234C	GYP7	Other
chr04:46173-46206;-	154.023	0.0917319	0.356942	0.0659531	0.797323	0.855276	YDL234C	GYP7	Other
chr04:46216-46245;-	199.951	0.66373	0.273823	5.92427	0.0149337	0.0344115	YDL234C	GYP7	Other
chr04:46386-46433;-	186.742	0.556484	0.301603	3.4117	0.0647357	0.115343	YDL234C	GYP7	Other
chr04:46441-46494;-	191.024	0.3474	0.283108	1.50365	0.22011	0.314936	YDL234C	GYP7	Other
chr04:46612-46678;-	203.427	0.37291	0.270602	1.89602	0.168524	0.254592	YDL234C	GYP7	Other
chr04:48988-49021;+	112.172	-0.0313525	0.31962	0.00963094	0.921823	0.947095	YDL233W	YDL233W	Other
chr04:49090-49128;+	53.4128	-1.61871	0.708989	6.53387	0.0105839	0.0258794	YDL233W	YDL233W	Other
chr04:49133-49159;+	68.5375	-0.272521	0.447941	0.377543	0.538921	0.64173	YDL233W	YDL233W	Other
chr04:49250-49298;+	115.693	0.816739	0.29891	7.41397	0.00647193	0.0169714	YDL233W	YDL233W	Other
chr04:49687-49705;+	110.792	1.23285	0.38365	10.131	0.00145795	0.00481548	YDL232W	OST4	Other
chr04:49770-49836;+	200.92	0.648479	0.289676	4.92902	0.0264092	0.0549485	YDL232W	OST4	Other
chr04:49986-50036;-	117.944	-0.570968	0.364203	2.44597	0.117827	0.190004	YDL231C	BRE4	Other
chr04:50725-50771;-	105.859	-1.79283	0.452099	17.4376	2.96894e-05	0.000168122	YDL231C	BRE4	Ime4p-dependent
chr04:54577-54600;+	103.765	0.207223	0.571054	0.132418	0.715938	0.791616	YDL230W	PTP1	Other
chr04:54709-54756;+	73.1524	-0.413427	0.408458	1.03362	0.309311	0.413703	YDL230W	PTP1	Other
chr04:68762-68779;+	134.118	0.315125	0.343658	0.832951	0.36142	0.468842	YDL225W	SHS1	Other
chr04:69157-69187;+	140.167	-0.609188	0.349042	3.18235	0.0744374	0.129488	YDL225W	SHS1	Other
chr04:69191-69230;+	174.747	-0.714922	0.292109	6.31437	0.0119763	0.0286223	YDL225W	SHS1	Other
chr04:69249-69269;+	100.078	-1.78118	0.600754	11.1945	0.000820414	0.00295368	YDL225W	SHS1	Other
chr04:69300-69317;+	98.3199	-1.6162	0.606234	8.74628	0.00310235	0.0091361	YDL225W	SHS1	Other
chr04:69709-69780;+	223.18	-0.130926	0.236353	0.30863	0.578522	0.67653	YDL225W	SHS1	Other
chr04:69813-69856;+	165.982	0.748458	0.288349	6.71843	0.00954217	0.0236418	YDL225W	SHS1	Other
chr04:73757-73781;-	401.011	-0.298951	0.333026	0.804311	0.369808	0.477835	YDL223C	HBT1	Other
chr04:73821-73878;-	564.155	-0.211185	0.277823	0.574635	0.448423	0.557396	YDL223C	HBT1	Other
chr04:75432-75456;-	379.668	-0.946578	0.492938	3.63985	0.0564119	0.10293	YDL223C	HBT1	Other
chr04:75560-75585;-	406.974	-0.757643	0.348909	4.69494	0.0302516	0.0613902	YDL223C	HBT1	Other
chr04:75593-75628;-	522.469	-0.756604	0.305202	6.117	0.0133888	0.0314764	YDL223C	HBT1	Other
chr04:75667-75693;-	496.737	-2.13252	0.409044	26.8381	2.21235e-07	2.34775e-06	YDL223C	HBT1	Ime4p-dependent
chr04:75698-75731;-	671.696	-1.57736	0.340978	21.1876	4.1646e-06	3.03777e-05	YDL223C	HBT1	Ime4p-dependent
chr04:75767-75797;-	448.833	-0.365491	0.384466	0.899125	0.343016	0.449255	YDL223C	HBT1	Other
chr04:76427-76501;-	506.288	0.778013	0.380465	4.19848	0.0404602	0.0781377	YDL222C	FMP45	Other
chr04:76581-76607;-	274.731	1.20125	0.491046	6.06503	0.0137885	0.0322646	YDL222C	FMP45	Other
chr04:83789-83829;-	37.6244	-3.43335	1.06428	19.8316	8.45719e-06	5.63359e-05	YDL217C	TIM22	Ime4p-dependent
chr04:85434-85464;-	81.9529	-0.438123	0.367672	1.44773	0.228893	0.324714	YDL216C	RRI1	Other
chr04:86418-86461;-	1057.2	0.804799	0.194148	16.9902	3.75733e-05	0.000206088	YDL215C	GDH2	Other
chr04:86747-86765;-	996.951	1.10273	0.214663	26.2141	3.05585e-07	3.09453e-06	YDL215C	GDH2	Other
chr04:86826-86850;-	1238.27	1.03697	0.316677	10.789	0.00102105	0.003555	YDL215C	GDH2	Other
chr04:86983-86998;-	1059.46	1.16368	0.193518	35.9661	2.00779e-09	3.6825e-08	YDL215C	GDH2	Other
chr04:87034-87060;-	1006.68	1.22421	0.213338	32.8876	9.76434e-09	1.50643e-07	YDL215C	GDH2	Other
chr04:87220-87236;-	892.083	-0.352511	0.317034	1.27241	0.259315	0.359252	YDL215C	GDH2	Other
chr04:87333-87370;-	1024.31	0.262042	0.209363	1.54988	0.213153	0.306773	YDL215C	GDH2	Other
chr04:87374-87396;-	955.818	0.49368	0.345529	2.02965	0.154256	0.237483	YDL215C	GDH2	Other
chr04:87630-87657;-	969.723	1.14042	0.310271	13.5553	0.000231639	0.000987448	YDL215C	GDH2	Other
chr04:87779-87793;-	976.422	0.39789	0.228571	2.98265	0.0841615	0.143367	YDL215C	GDH2	Other
chr04:87811-87831;-	971.823	-0.400201	0.253647	2.54839	0.110407	0.179928	YDL215C	GDH2	Other
chr04:87867-87903;-	1136.92	0.0281051	0.19138	0.0215287	0.883348	0.919534	YDL215C	GDH2	Other
chr04:87963-87979;-	968.027	0.488933	0.235382	4.26718	0.0388555	0.0756216	YDL215C	GDH2	Other
chr04:88071-88104;-	1050.83	0.114843	0.204176	0.314903	0.574687	0.673886	YDL215C	GDH2	Other
chr04:88139-88206;-	1267.49	0.386962	0.183993	4.39056	0.0361384	0.0712514	YDL215C	GDH2	Other
chr04:88213-88274;-	1273	0.138912	0.218979	0.401218	0.526461	0.630989	YDL215C	GDH2	Other
chr04:89226-89244;-	917.378	0.841312	0.271823	9.38509	0.00218757	0.0067984	YDL215C	GDH2	Other
chr04:94779-94860;+	183.027	-0.253795	0.267291	0.894637	0.344224	0.450277	YDL212W	SHR3	Other
chr04:104868-104918;+	173.581	1.0027	0.417175	5.94026	0.0147988	0.0341751	YDL207W	GLE1	Other
chr04:108723-108764;-	166.592	0.801151	0.271927	8.69379	0.00319297	0.00936348	YDL205C	HEM3	Other
chr04:108928-108990;-	159.05	-0.0662571	0.285949	0.0538088	0.816563	0.869351	YDL205C	HEM3	Other
chr04:111083-111123;+	374.7	0.458387	0.317754	2.1082	0.146512	0.227567	YDL204W	RTN2	Other
chr04:111294-111339;+	457.254	0.561138	0.237629	5.70003	0.0169646	0.0381133	YDL204W	RTN2	Other
chr04:111370-111406;+	341.489	0.490037	0.269482	3.38377	0.0658414	0.116974	YDL204W	RTN2	Other
chr04:111613-111671;+	549.605	0.309261	0.233053	1.77241	0.183084	0.272223	YDL204W	RTN2	Other
chr04:111751-111778;+	387.174	0.548783	0.254121	4.78121	0.0287718	0.0588608	YDL204W	RTN2	Other
chr04:111788-111838;+	462.321	0.518911	0.232234	5.10027	0.0239222	0.0507161	YDL204W	RTN2	Other
chr04:111863-111899;+	442.766	0.784798	0.345283	5.23411	0.0221481	0.0477419	YDL204W	RTN2	Other
chr04:112103-112129;-	74.4863	-3.37388	0.544634	55.3256	1.02128e-13	4.28264e-12	YDL203C	ACK1	Ime4p-dependent
chr04:116610-116634;-	110.217	0.622516	0.35772	3.07065	0.0797174	0.137171	YDL200C	MGT1	Other
chr04:116638-116677;-	120.649	-0.260054	0.337672	0.593772	0.440964	0.54956	YDL200C	MGT1	Other
chr04:117457-117483;-	382.768	0.64053	0.281369	5.13255	0.0234812	0.0499861	YDL199C	YDL199C	Other
chr04:117506-117527;-	376.974	1.33634	0.254385	27.3419	1.70478e-07	1.87388e-06	YDL199C	YDL199C	Other
chr04:117549-117576;-	349.392	0.947386	0.28054	11.2184	0.000809896	0.00292023	YDL199C	YDL199C	Other
chr04:117650-117668;-	302.226	0.0238188	0.364864	0.00425521	0.947989	0.965847	YDL199C	YDL199C	Other
chr04:117685-117715;-	339.595	0.914748	0.296223	9.27441	0.00232378	0.00716322	YDL199C	YDL199C	Other
chr04:117788-117806;-	348.352	1.12333	0.277759	16.0505	6.1674e-05	0.000317166	YDL199C	YDL199C	Other
chr04:118196-118215;-	290.412	0.969678	0.375434	6.47575	0.0109356	0.0265687	YDL199C	YDL199C	Other
chr04:118376-118393;-	283.093	0.232229	0.421571	0.298284	0.58496	0.682298	YDL199C	YDL199C	Other
chr04:118405-118426;-	293.606	0.685129	0.372544	3.27688	0.0702622	0.123331	YDL199C	YDL199C	Other
chr04:118663-118688;-	313.509	-0.791596	0.388629	4.51654	0.0335687	0.0669093	YDL199C	YDL199C	Other
chr04:118704-118742;-	385.565	-0.300634	0.286943	1.11402	0.29121	0.394907	YDL199C	YDL199C	Other
chr04:119050-119070;-	328.889	0.52218	0.302417	2.92062	0.087454	0.147969	YDL199C	YDL199C	Other
chr04:119159-119200;-	367.577	0.567805	0.284127	3.92548	0.0475596	0.0895107	YDL199C	YDL199C	Other
chr04:119248-119279;-	331.512	0.949264	0.296244	10.005	0.00156119	0.0051016	YDL199C	YDL199C	Other
chr04:119311-119339;-	346.289	0.741644	0.27954	6.87897	0.00872156	0.0219283	YDL199C	YDL199C	Other
chr04:119976-120025;-	83.9318	0.729453	0.418562	2.87566	0.0899281	0.151563	YDL198C	GGC1	Other
chr04:120949-121019;-	143.544	-0.329366	0.275759	1.43468	0.231001	0.326974	YDL197C	ASF2	Other
chr04:121100-121144;-	122.464	-1.75897	0.356583	28.3219	1.02728e-07	1.19252e-06	YDL197C	ASF2	Ime4p-dependent
chr04:124572-124658;+	193.028	-1.54594	0.646824	5.65293	0.0174262	0.0390122	YDL195W	SEC31	Other
chr04:125893-125991;+	280.817	0.736271	0.305559	5.86527	0.0154425	0.0353698	YDL195W	SEC31	Other
chr04:126464-126513;+	214.614	0.590297	0.356249	2.75231	0.0971138	0.1615	YDL195W	SEC31	Other
chr04:126610-126659;+	181.661	-0.0855087	0.406666	0.044348	0.833207	0.882138	YDL195W	SEC31	Other
chr04:127796-127837;+	157.684	0.177536	0.356273	0.245738	0.620092	0.712537	YDL194W	SNF3	Other
chr04:129716-129750;+	160.875	0.527811	0.338865	2.3757	0.123236	0.196893	YDL194W	SNF3	Other
chr04:129755-129779;+	177.948	1.22869	0.311626	15.4951	8.27195e-05	0.000409255	YDL194W	SNF3	Other
chr04:129787-129805;+	136.808	0.596059	0.435201	1.83207	0.175884	0.263618	YDL194W	SNF3	Other
chr04:130070-130119;+	260.694	1.40561	0.225523	39.3147	3.60716e-10	7.78606e-09	YDL194W	SNF3	Other
chr04:130227-130244;+	192.341	1.0754	0.283872	14.2094	0.000163555	0.000737158	YDL194W	SNF3	Other
chr04:130267-130290;+	165.296	0.579702	0.33209	2.98166	0.084213	0.143415	YDL194W	SNF3	Other
chr04:130349-130377;+	141.801	-0.899779	0.475735	3.96971	0.0463258	0.0877738	YDL194W	SNF3	Other
chr04:131184-131237;+	863.078	-0.333265	0.204422	2.68779	0.10112	0.166937	YDL193W	NUS1	Other
chr04:131310-131325;+	508.58	0.507774	0.211899	5.56778	0.018294	0.0406585	YDL193W	NUS1	Other
chr04:131752-131773;+	713.659	0.851572	0.301007	8.04609	0.00456021	0.0125989	YDL193W	NUS1	Other
chr04:131781-131794;+	470.403	1.33283	0.219733	35.4337	2.63887e-09	4.73951e-08	YDL193W	NUS1	Other
chr04:131958-131992;+	530.468	0.872461	0.200184	18.2192	1.96886e-05	0.000117277	YDL193W	NUS1	Other
chr04:132703-132794;+	208.641	0.590758	0.265573	4.90229	0.0268211	0.055611	YDL192W	ARF1	Other
chr04:132871-132899;+	88.6378	0.371818	0.439134	0.704079	0.401416	0.510977	YDL192W	ARF1	Other
chr04:133034-133079;+	132.05	0.259142	0.319172	0.650801	0.419826	0.528976	YDL192W	ARF1	Other
chr04:134695-134723;-	145.359	1.11538	0.355035	9.7884	0.00175616	0.00563047	YDL190C	UFD2	Other
chr04:135834-135869;-	128.299	-0.202713	0.436228	0.219047	0.639767	0.728636	YDL190C	UFD2	Other
chr04:136889-136919;-	127.234	-0.910367	0.485667	3.86955	0.0491698	0.0919362	YDL190C	UFD2	Other
chr04:137031-137056;-	130.561	-0.945257	0.465642	4.56654	0.0326023	0.0654452	YDL190C	UFD2	Other
chr04:137074-137132;-	159.892	-1.62881	0.437889	16.9121	3.91515e-05	0.000213421	YDL190C	UFD2	Ime4p-dependent
chr04:143291-143328;+	244.7	-1.68261	0.400796	21.457	3.6186e-06	2.68058e-05	YDL185W	TFP1	Ime4p-dependent
chr04:143331-143345;+	214.194	-1.32451	0.44494	10.2777	0.00134651	0.0045024	YDL185W	TFP1	Other
chr04:143366-143392;+	274.762	-0.287832	0.293143	0.977292	0.322868	0.427869	YDL185W	TFP1	Other
chr04:144011-144024;+	353.439	0.606392	0.316043	3.64817	0.0561308	0.102515	YDL185W	TFP1	Other
chr04:144041-144056;+	248.762	0.534468	0.302908	3.08138	0.0791931	0.136466	YDL185W	TFP1	Other
chr04:144303-144331;+	236.423	0.646102	0.322564	3.96462	0.046466	0.0879693	YDL185W	TFP1	Other
chr04:145176-145215;-	172.588	0.348871	0.60674	0.32928	0.566083	0.666075	YDL184C	RPL41A	Other
chr04:145220-145244;-	121.245	0.726629	0.324486	5.03537	0.0248347	0.052232	YDL184C	RPL41A	Other
chr04:145986-146011;-	63.8447	-1.12132	0.500878	5.70655	0.0169017	0.0380341	YDL183C	YDL183C	Other
chr04:148230-148274;+	100.888	-0.765545	0.341239	5.07959	0.0242091	0.0511761	YDL182W	LYS20	Other
chr04:148326-148388;+	121.41	-1.28353	0.320929	16.6964	4.38637e-05	0.000235101	YDL182W	LYS20	Ime4p-dependent
chr04:149155-149193;+	91.6676	-0.14982	0.36579	0.167286	0.682535	0.763551	YDL182W	LYS20	Other
chr04:149940-149972;+	365.552	0.984223	0.25949	14.2541	0.00015971	0.000721378	YDL181W	INH1	Other
chr04:150012-150087;+	537.786	0.48003	0.265416	3.26232	0.0708886	0.124202	YDL181W	INH1	Other
chr04:150098-150139;+	429.453	0.522917	0.257658	4.08234	0.0433337	0.0828633	YDL181W	INH1	Other
chr04:151497-151529;+	67.2529	-0.502317	0.48352	1.11703	0.290559	0.394162	YDL180W	YDL180W	Other
chr04:160470-160493;-	134.062	1.18015	0.376064	10.0508	0.00152281	0.0049899	YDL174C	DLD1	Other
chr04:160516-160543;-	153.297	0.834989	0.339619	6.05203	0.0138903	0.0324391	YDL174C	DLD1	Other
chr04:160568-160598;-	138.597	0.806866	0.358934	5.06678	0.0243887	0.0514872	YDL174C	DLD1	Other
chr04:160604-160639;-	145.224	0.331642	0.356822	0.858561	0.354142	0.461096	YDL174C	DLD1	Other
chr04:160877-160915;-	120.425	-0.263757	0.421569	0.395998	0.529163	0.633359	YDL174C	DLD1	Other
chr04:160960-160984;-	128.122	0.712864	0.385027	3.42103	0.0643709	0.114811	YDL174C	DLD1	Other
chr04:163090-163111;+	124.449	0.971909	0.362119	7.24126	0.00712471	0.0184344	YDL173W	PAR32	Other
chr04:163624-163731;+	529.438	0.245608	0.21249	1.33607	0.247728	0.345622	YDL173W	PAR32	Other
chr04:164034-164080;-	214.034	-1.64516	0.35112	23.5344	1.22698e-06	1.05317e-05	YDL171C	GLT1	Ime4p-dependent
chr04:164100-164145;-	181.46	-1.01971	0.404275	6.50782	0.0107401	0.0261672	YDL171C	GLT1	Other
chr04:173094-173136;-	201.622	0.591837	0.264005	5.02071	0.0250459	0.0525446	YDL169C	UGX2	Other
chr04:173153-173168;-	100.101	0.385368	0.377661	1.03708	0.308502	0.412991	YDL169C	UGX2	Other
chr04:173181-173230;-	190.14	1.05112	0.295367	12.8809	0.000331959	0.00135213	YDL169C	UGX2	Other
chr04:178998-179041;+	122.037	0.248946	0.351622	0.499324	0.479797	0.587722	YDL165W	CDC36	Other
chr04:179043-179066;+	88.684	1.36925	0.383586	12.7338	0.000359113	0.00144114	YDL165W	CDC36	Other
chr04:179261-179274;+	54.2747	-0.0134073	0.574457	0.000545832	0.981361	0.98769	YDL165W	CDC36	Other
chr04:179542-179592;-	125.281	-1.46276	0.30226	22.7483	1.84671e-06	1.4948e-05	YDL164C	CDC9	Ime4p-dependent
chr04:184645-184705;-	367.221	0.0520103	0.261893	0.0394546	0.842551	0.888669	YDL160C	DHH1	Other
chr04:184800-184856;-	501.951	0.971508	0.480692	4.10744	0.0426948	0.0819379	YDL160C	DHH1	Other
chr04:185015-185031;-	246.37	0.336552	0.355363	0.887039	0.346281	0.452347	YDL160C	DHH1	Other
chr04:185103-185129;-	318.712	0.16725	0.281944	0.350929	0.553588	0.654853	YDL160C	DHH1	Other
chr04:185178-185216;-	382.313	0.487446	0.26572	3.35341	0.0670659	0.118596	YDL160C	DHH1	Other
chr04:185240-185257;-	255.369	0.390425	0.348585	1.23426	0.266581	0.36734	YDL160C	DHH1	Other
chr04:185897-185935;-	301.758	0.5366	0.306954	3.01383	0.0825569	0.141189	YDL160C	DHH1	Other
chr04:188713-188768;+	100.391	-1.99191	0.381335	31.6252	1.86986e-08	2.7133e-07	YDL159W	STE7	Ime4p-dependent
chr04:191855-191890;+	139.94	1.06607	0.357641	9.14743	0.00249068	0.00759409	YDL155W	CLB3	Other
chr04:192729-192748;+	94.7504	-2.09626	0.527295	19.6724	9.19216e-06	6.02882e-05	YDL155W	CLB3	Ime4p-dependent
chr04:192754-192774;+	89.1898	-1.76447	0.532939	12.9761	0.000315492	0.00129224	YDL155W	CLB3	Other
chr04:192776-192792;+	92.9594	-1.97591	0.526812	17.2615	3.25718e-05	0.000182276	YDL155W	CLB3	Ime4p-dependent
chr04:193271-193304;+	489.421	-1.20282	0.336264	14.2869	0.000156955	0.000710103	YDL154W	MSH5	Ime4p-dependent
chr04:193310-193321;+	404.507	-2.30284	0.516904	28.9609	7.38544e-08	8.93864e-07	YDL154W	MSH5	Ime4p-dependent
chr04:193328-193355;+	752.606	-2.1968	0.322668	55.5153	9.27365e-14	3.92337e-12	YDL154W	MSH5	Ime4p-dependent
chr04:193398-193430;+	576.489	-1.70788	0.344312	28.2756	1.05215e-07	1.21842e-06	YDL154W	MSH5	Ime4p-dependent
chr04:193520-193551;+	410.227	-0.160069	0.338454	0.224465	0.635658	0.725294	YDL154W	MSH5	Other
chr04:198354-198396;+	58.2586	-1.74009	0.76861	6.89582	0.00863974	0.0218032	YDL150W	RPC53	Other
chr04:198489-198517;+	58.6446	0.333811	0.517217	0.405144	0.524445	0.629294	YDL150W	RPC53	Other
chr04:199211-199276;+	88.626	0.393311	0.375649	1.06492	0.302095	0.406566	YDL150W	RPC53	Other
chr04:201225-201279;+	185.552	0.333704	0.364867	0.832128	0.361658	0.469022	YDL149W	ATG9	Other
chr04:201322-201365;+	191.633	-0.223873	0.359888	0.390115	0.532239	0.635841	YDL149W	ATG9	Other
chr04:201591-201635;+	178.713	-0.676735	0.414245	2.78721	0.0950197	0.158572	YDL149W	ATG9	Other
chr04:201900-201919;+	158.617	-0.335617	0.495329	0.466914	0.49441	0.600522	YDL149W	ATG9	Other
chr04:202055-202117;+	208.998	0.864375	0.631608	1.87507	0.170896	0.257435	YDL149W	ATG9	Other
chr04:202297-202328;+	209.114	0.791218	0.321678	6.08583	0.013627	0.0319339	YDL149W	ATG9	Other
chr04:202335-202369;+	202.036	0.424397	0.332439	1.62584	0.20228	0.2946	YDL149W	ATG9	Other
chr04:202460-202492;+	177.024	-0.184131	0.400737	0.212489	0.644823	0.732904	YDL149W	ATG9	Other
chr04:205954-205976;+	686.794	0.816951	0.325145	6.29286	0.0121225	0.0289426	YDL147W	RPN5	Other
chr04:206102-206120;+	582.28	1.07252	0.240452	19.325	1.10256e-05	7.02964e-05	YDL147W	RPN5	Other
chr04:206588-206601;+	585.893	1.71279	0.274456	38.8709	4.52787e-10	9.62072e-09	YDL147W	RPN5	Other
chr04:206647-206677;+	809.71	1.14563	0.209664	29.5792	5.36783e-08	6.7778e-07	YDL147W	RPN5	Other
chr04:206794-206815;+	796.442	-0.0958816	0.213028	0.202838	0.65244	0.739491	YDL147W	RPN5	Other
chr04:206838-206854;+	633.203	0.0949563	0.242603	0.152342	0.696307	0.775585	YDL147W	RPN5	Other
chr04:206861-206878;+	673.806	0.184345	0.244157	0.564668	0.452386	0.561076	YDL147W	RPN5	Other
chr04:209469-209501;-	148.56	0.080999	0.402008	0.0406161	0.840281	0.886865	YDL145C	COP1	Other
chr04:209792-209870;-	199.551	-0.735261	0.293362	6.36988	0.0116074	0.0279247	YDL145C	COP1	Other
chr04:210191-210257;-	190.019	0.439877	0.316992	1.95502	0.162047	0.24641	YDL145C	COP1	Other
chr04:215194-215210;+	145.683	-1.09181	0.603084	3.81086	0.0509214	0.0945981	YDL143W	CCT4	Other
chr04:215342-215387;+	270.388	0.0552584	0.238987	0.0532814	0.817449	0.870086	YDL143W	CCT4	Other
chr04:215394-215439;+	270.171	-0.000921319	0.241267	1.45706e-05	0.996954	0.998325	YDL143W	CCT4	Other
chr04:215468-215498;+	185.698	-0.422316	0.370964	1.35134	0.245044	0.342823	YDL143W	CCT4	Other
chr04:215951-215981;+	207.584	0.90593	0.283203	9.9344	0.00162218	0.00526656	YDL143W	CCT4	Other
chr04:216014-216105;+	313.859	0.284721	0.21082	1.7957	0.180233	0.269077	YDL143W	CCT4	Other
chr04:220363-220422;-	222.449	1.04428	0.605521	3.00321	0.0830998	0.141837	YDL140C	RPO21	Other
chr04:231579-231605;+	559.985	0.436252	0.179049	5.91992	0.0149706	0.0344882	YDL137W	ARF2	Other
chr04:231757-231777;+	566.785	-0.647544	0.23573	7.62394	0.00575985	0.0153365	YDL137W	ARF2	Other
chr04:233220-233263;-	277.746	0.0553433	0.213985	0.0669118	0.795887	0.853928	YDL135C	RDI1	Other
chr04:233329-233349;-	151.666	0.496336	0.334941	2.21921	0.136303	0.214355	YDL135C	RDI1	Other
chr04:233441-233454;-	183.96	0.0974558	0.277373	0.123568	0.725196	0.798697	YDL135C	RDI1	Other
chr04:233542-233584;-	238.445	-0.242689	0.235556	1.06468	0.302151	0.406583	YDL135C	RDI1	Other
chr04:234288-234303;-	162.953	0.488087	0.322636	2.28962	0.130242	0.206319	YDL134C	PPH21	Other
chr04:234329-234384;-	189.058	-0.883182	0.30029	9.13747	0.00250427	0.00762821	YDL134C	PPH21	Other
chr04:234387-234421;-	138.735	-1.31399	0.439982	10.0248	0.00154446	0.00505909	YDL134C	PPH21	Other
chr04:234673-234707;-	142.389	-0.380445	0.380294	1.01623	0.313415	0.41796	YDL134C	PPH21	Other
chr04:235380-235413;-	145.867	-0.696979	0.381101	3.47991	0.0621183	0.11163	YDL134C	PPH21	Other
chr04:235692-235727;-	130.145	0.0864185	0.412351	0.043826	0.834178	0.882576	YDL134C	PPH21	Other
chr04:236378-236407;-	740.057	0.484707	0.312817	2.41158	0.120441	0.193433	YDL133C-A	RPL41B	Other
chr04:236416-236459;-	1044.32	0.609506	0.146871	17.3016	3.18916e-05	0.000178916	YDL133C-A	RPL41B	Other
chr04:238710-238758;+	198.431	1.08123	0.30936	12.1675	0.000486304	0.00188329	YDL132W	CDC53	Other
chr04:239081-239105;+	154.46	-0.7309	0.50694	2.24178	0.134326	0.212049	YDL132W	CDC53	Other
chr04:239129-239147;+	154.858	0.0886144	0.459239	0.0370402	0.847383	0.892182	YDL132W	CDC53	Other
chr04:239859-239915;+	274.148	0.0253928	0.236828	0.0114937	0.914623	0.940917	YDL132W	CDC53	Other
chr04:239921-239943;+	167.517	-0.758606	0.450156	3.06918	0.0797895	0.137221	YDL132W	CDC53	Other
chr04:239984-240018;+	235.954	0.490955	0.262917	3.43335	0.0638924	0.114107	YDL132W	CDC53	Other
chr04:240366-240389;+	195.264	-0.510991	0.342196	2.33193	0.126745	0.201618	YDL132W	CDC53	Other
chr04:241088-241171;+	249.609	0.610168	0.24987	5.8668	0.015429	0.0353475	YDL132W	CDC53	Other
chr04:243105-243148;+	126.192	0.0994177	0.340364	0.0850656	0.770547	0.835307	YDL131W	LYS21	Other
chr04:243179-243215;+	129.098	-0.261537	0.327195	0.641337	0.423227	0.532052	YDL131W	LYS21	Other
chr04:243826-243843;+	343.84	0.863103	0.225866	14.582	0.000134188	0.000618564	YDL130W-A	STF1	Other
chr04:243875-243895;+	343.117	0.303147	0.228651	1.7565	0.185062	0.274476	YDL130W-A	STF1	Other
chr04:244057-244085;+	311.798	0.266043	0.225266	1.38706	0.238902	0.336158	YDL130W-A	STF1	Other
chr04:248516-248556;+	163.974	-1.52656	0.321736	22.8121	1.78636e-06	1.44841e-05	YDL128W	VCX1	Ime4p-dependent
chr04:250081-250130;+	87.3524	0.387065	0.360685	1.15688	0.282113	0.385009	YDL127W	PCL2	Other
chr04:250779-250798;-	533.976	-0.828841	0.287444	8.89033	0.00286686	0.00854135	YDL126C	CDC48	Other
chr04:250834-250846;-	602.062	-2.57546	0.356614	71.4757	2.80696e-17	2.19012e-15	YDL126C	CDC48	Ime4p-dependent
chr04:250852-250888;-	1083.25	-1.68738	0.187026	87.73	7.50296e-21	1.03508e-18	YDL126C	CDC48	Ime4p-dependent
chr04:251926-251960;-	624.432	0.225026	0.319621	0.494383	0.481979	0.589484	YDL126C	CDC48	Other
chr04:252222-252249;-	653.628	0.957097	0.204445	21.9274	2.83155e-06	2.15974e-05	YDL126C	CDC48	Other
chr04:252298-252332;-	735.669	0.729148	0.214195	11.5928	0.000662086	0.00244753	YDL126C	CDC48	Other
chr04:253693-253755;-	586.821	0.713602	0.204091	12.0605	0.000515028	0.00198083	YDL125C	HNT1	Other
chr04:253790-253807;-	282.159	0.846136	0.271055	9.28551	0.00230973	0.00712685	YDL125C	HNT1	Other
chr04:253847-253870;-	276.328	0.0283325	0.317628	0.0079268	0.929056	0.951995	YDL125C	HNT1	Other
chr04:255667-255707;+	129.349	-0.49725	0.397998	1.55125	0.212951	0.306529	YDL124W	YDL124W	Other
chr04:256544-256592;+	188.405	0.463716	0.296362	2.46198	0.116632	0.188524	YDL123W	SNA4	Other
chr04:256630-256658;+	153.525	0.412724	0.33653	1.51025	0.219101	0.313864	YDL123W	SNA4	Other
chr04:259489-259527;+	87.283	0.800603	0.431675	3.34209	0.0675287	0.119237	YDL122W	UBP1	Other
chr04:264864-264917;+	79.6868	-1.33825	0.503812	7.61878	0.00577634	0.0153718	YDL117W	CYK3	Other
chr04:267951-268005;+	74.7331	-1.17175	0.523393	5.71215	0.0168479	0.0379406	YDL116W	NUP84	Other
chr04:268014-268076;+	82.5347	-0.658221	0.436651	2.40486	0.120959	0.194069	YDL116W	NUP84	Other
chr04:268661-268678;-	107.291	-0.686138	0.573343	1.56989	0.210223	0.303567	YDL115C	IWR1	Other
chr04:268679-268697;-	116.463	0.406292	0.436179	0.838414	0.359851	0.467032	YDL115C	IWR1	Other
chr04:268862-268883;-	143.491	0.485434	0.348052	1.88489	0.169779	0.256	YDL115C	IWR1	Other
chr04:268886-268924;-	185.26	0.8523	0.288383	8.4179	0.00371546	0.0106496	YDL115C	IWR1	Other
chr04:269507-269527;-	172.064	1.24888	0.295533	17.2084	3.3495e-05	0.000186482	YDL115C	IWR1	Other
chr04:279052-279092;-	1309.22	0.411028	0.237288	3.01175	0.0826632	0.141295	YDL110C	TMA17	Other
chr04:279096-279112;-	615.393	0.210543	0.19374	1.17572	0.278229	0.380799	YDL110C	TMA17	Other
chr04:279133-279151;-	654.706	-0.846944	0.230573	13.895	0.000193313	0.000845658	YDL110C	TMA17	Other
chr04:279217-279257;-	1062.65	-0.132756	0.218325	0.369955	0.543029	0.645724	YDL110C	TMA17	Other
chr04:279259-279274;-	647.087	0.107183	0.289899	0.137209	0.711072	0.787698	YDL110C	TMA17	Other
chr04:283028-283099;+	70.2042	-2.24317	0.535512	23.4678	1.27022e-06	1.08272e-05	YDL108W	KIN28	Ime4p-dependent
chr04:285034-285102;-	124.603	-0.50669	0.351922	2.10484	0.146833	0.227899	YDL106C	PHO2	Other
chr04:285872-285922;-	110.969	-0.586497	0.395283	2.24411	0.134124	0.211799	YDL106C	PHO2	Other
chr04:286325-286390;-	186.332	1.06256	0.291647	13.7979	0.000203565	0.000883599	YDL106C	PHO2	Other
chr04:288014-288063;+	94.9664	-1.03485	0.355742	8.61461	0.00333478	0.00969274	YDL105W	NSE4	Other
chr04:288101-288157;+	116.112	-0.97182	0.32135	9.24024	0.00236754	0.00727927	YDL105W	NSE4	Other
chr04:289936-289957;-	199.05	0.478641	0.318964	2.23558	0.134866	0.212723	YDL103C	QRI1	Other
chr04:290151-290187;-	245.173	-0.0983195	0.267534	0.13541	0.712887	0.789067	YDL103C	QRI1	Other
chr04:290195-290214;-	188.285	-0.654536	0.370315	3.27745	0.070238	0.123312	YDL103C	QRI1	Other
chr04:290240-290276;-	248.827	-0.458063	0.265891	3.0497	0.0807519	0.138625	YDL103C	QRI1	Other
chr04:290365-290386;-	190.031	0.466265	0.33626	1.91049	0.166909	0.252436	YDL103C	QRI1	Other
chr04:290616-290630;-	206.702	1.38358	0.320304	19.4653	1.02441e-05	6.59323e-05	YDL103C	QRI1	Other
chr04:290697-290760;-	280.018	0.291068	0.235793	1.51422	0.218496	0.313232	YDL103C	QRI1	Other
chr04:290965-291000;-	205.431	0.42435	0.309034	1.86994	0.171482	0.258037	YDL103C	QRI1	Other
chr04:291172-291204;-	211.21	0.583169	0.293326	3.94617	0.0469781	0.0886568	YDL103C	QRI1	Other
chr04:294926-294951;-	87.6061	-1.30727	0.383721	12.541	0.000398111	0.00157638	YDL101C	DUN1	Other
chr04:296691-296791;-	579.764	1.11104	0.149474	53.6684	2.37356e-13	9.45351e-12	YDL100C	GET3	Other
chr04:296913-296944;-	281.162	1.20781	0.23856	24.5783	7.13494e-07	6.64555e-06	YDL100C	GET3	Other
chr04:296989-297026;-	273.016	0.669137	0.247146	7.04487	0.00794927	0.0202546	YDL100C	GET3	Other
chr04:297142-297157;-	261.804	1.02467	0.246267	16.5282	4.79313e-05	0.000254608	YDL100C	GET3	Other
chr04:297256-297275;-	244.521	0.505123	0.27328	3.3013	0.0692249	0.121842	YDL100C	GET3	Other
chr04:297307-297321;-	179.944	0.300315	0.412937	0.514679	0.47312	0.581189	YDL100C	GET3	Other
chr04:297684-297711;-	236.818	0.698714	0.275021	6.18436	0.0128884	0.030458	YDL100C	GET3	Other
chr04:297988-298012;+	127.311	1.27558	0.347558	14.568	0.000135191	0.000622584	YDL099W	BUG1	Other
chr04:298303-298354;+	201.085	1.0367	0.272884	14.9374	0.000111138	0.000526328	YDL099W	BUG1	Other
chr04:300792-300857;-	480.208	-0.223268	0.17821	1.59895	0.206052	0.298905	YDL097C	RPN6	Other
chr04:300861-300891;-	286.394	-0.43994	0.264495	2.90831	0.0881244	0.148892	YDL097C	RPN6	Other
chr04:301032-301058;-	422.302	0.123042	0.183581	0.446102	0.504192	0.609758	YDL097C	RPN6	Other
chr04:301075-301144;-	518.09	-0.448983	0.173966	6.95889	0.00834038	0.0211149	YDL097C	RPN6	Other
chr04:301214-301237;-	273.877	-0.104835	0.264994	0.158129	0.690885	0.77108	YDL097C	RPN6	Other
chr04:303663-303684;+	306.864	0.974733	0.293082	11.2638	0.000790349	0.00285841	YDL095W	PMT1	Other
chr04:303922-303941;+	285.632	-0.638835	0.325422	3.97539	0.0461697	0.0875129	YDL095W	PMT1	Other
chr04:303958-303976;+	252.155	-1.82548	0.483401	17.2339	3.30479e-05	0.000184506	YDL095W	PMT1	Ime4p-dependent
chr04:303983-304022;+	485.069	-0.407975	0.268537	2.32338	0.127443	0.202539	YDL095W	PMT1	Other
chr04:304060-304080;+	284.646	0.0452311	0.313602	0.0208043	0.885313	0.920357	YDL095W	PMT1	Other
chr04:304096-304108;+	288.088	0.233587	0.31036	0.565349	0.452113	0.560811	YDL095W	PMT1	Other
chr04:306700-306762;+	232.546	-2.06604	0.293265	60.0552	9.22317e-15	4.72018e-13	YDL093W	PMT5	Ime4p-dependent
chr04:306765-306788;+	165.766	-1.63831	0.36521	22.9406	1.67085e-06	1.37229e-05	YDL093W	PMT5	Ime4p-dependent
chr04:307682-307710;+	85.7295	0.488679	0.344569	1.99121	0.158215	0.242246	YDL092W	SRP14	Other
chr04:307993-308012;-	105.266	0.24634	0.387379	0.403318	0.525381	0.630244	YDL091C	UBX3	Other
chr04:308364-308411;-	144.368	1.07822	0.297957	13.6476	0.000220518	0.000947681	YDL091C	UBX3	Other
chr04:308430-308474;-	151.629	0.348674	0.276082	1.59485	0.206634	0.299552	YDL091C	UBX3	Other
chr04:308533-308555;-	84.4495	-0.461231	0.508392	0.841721	0.358905	0.465966	YDL091C	UBX3	Other
chr04:309809-309838;-	145.696	-0.92541	0.327822	8.07241	0.00449442	0.012442	YDL090C	RAM1	Other
chr04:311602-311636;+	89.7779	-0.50845	0.383354	1.79909	0.179822	0.268548	YDL089W	NUR1	Other
chr04:316617-316648;+	122.783	0.126243	0.355938	0.125691	0.722942	0.797371	YDL086W	YDL086W	Other
chr04:316724-316861;+	281.008	0.0262188	0.2121	0.0152627	0.901678	0.931828	YDL086W	YDL086W	Other
chr04:318558-318579;+	312.929	0.518031	0.265256	3.84774	0.0498131	0.0928472	YDL085W	NDE2	Other
chr04:318681-318698;+	285.858	0.447306	0.276253	2.63898	0.104271	0.171425	YDL085W	NDE2	Other
chr04:318713-318751;+	422.196	0.0336733	0.369733	0.00832638	0.927295	0.950972	YDL085W	NDE2	Other
chr04:318811-318834;+	355.643	0.1743	0.265369	0.434696	0.509693	0.615005	YDL085W	NDE2	Other
chr04:318845-318871;+	340.981	-0.0851729	0.241972	0.124081	0.724649	0.79828	YDL085W	NDE2	Other
chr04:318901-318922;+	336.453	0.0412526	0.268302	0.0237018	0.877646	0.915732	YDL085W	NDE2	Other
chr04:319016-319038;+	274.626	0.432339	0.290378	2.22888	0.135452	0.213296	YDL085W	NDE2	Other
chr04:319097-319125;+	343.597	0.648798	0.242663	7.24683	0.00710262	0.0183977	YDL085W	NDE2	Other
chr04:319364-319379;+	290.434	-0.529452	0.279655	3.62474	0.0569263	0.10357	YDL085W	NDE2	Other
chr04:319865-319888;+	253.79	0.795276	0.266439	8.66384	0.00324587	0.00948355	YDL084W	SUB2	Other
chr04:320337-320367;+	215.417	0.461621	0.324545	1.97392	0.160032	0.244008	YDL084W	SUB2	Other
chr04:320386-320408;+	205.341	0.650432	0.347532	3.40027	0.0651857	0.115982	YDL084W	SUB2	Other
chr04:320470-320494;+	203.448	1.11124	0.346063	10.0744	0.00150343	0.00494422	YDL084W	SUB2	Other
chr04:320561-320636;+	321.402	0.23474	0.22517	1.07269	0.300339	0.404661	YDL084W	SUB2	Other
chr04:320663-320685;+	234.58	1.70004	0.295684	33.6902	6.46246e-09	1.03388e-07	YDL084W	SUB2	Other
chr04:320741-320771;+	252.123	0.613266	0.280195	4.65342	0.0309917	0.0626615	YDL084W	SUB2	Other
chr04:320783-320824;+	236.316	0.828585	0.289263	7.96845	0.00475998	0.0130502	YDL084W	SUB2	Other
chr04:321133-321183;+	266.651	0.283321	0.258413	1.18266	0.276814	0.37967	YDL084W	SUB2	Other
chr04:324299-324340;-	88.9448	-0.31087	0.44602	0.483776	0.486717	0.59401	YDL081C	RPP1A	Other
chr04:324396-324448;-	102.049	0.251868	0.430077	0.343517	0.557806	0.658942	YDL081C	RPP1A	Other
chr04:324690-324750;-	142.568	0.48607	0.378056	1.65923	0.197707	0.28949	YDL081C	RPP1A	Other
chr04:325178-325212;-	77.5447	-2.01996	0.591565	15.7487	7.23383e-05	0.000363947	YDL080C	THI3	Ime4p-dependent
chr04:325378-325411;-	66.3069	0.237274	0.481255	0.240894	0.623561	0.715229	YDL080C	THI3	Other
chr04:329878-329916;-	581.705	0.429552	0.322564	1.77246	0.183078	0.272223	YDL078C	MDH3	Other
chr04:330058-330091;-	502.198	0.78598	0.281591	7.79644	0.00523494	0.0141446	YDL078C	MDH3	Other
chr04:330298-330315;-	396.028	0.641712	0.331013	3.74737	0.0528905	0.0975141	YDL078C	MDH3	Other
chr04:330407-330486;-	793.436	0.0653016	0.287836	0.0513496	0.820731	0.872422	YDL078C	MDH3	Other
chr04:330513-330527;-	413.384	0.361826	0.283834	1.60577	0.205088	0.297778	YDL078C	MDH3	Other
chr04:330591-330614;-	495.421	0.913693	0.232779	15.3995	8.70098e-05	0.000427592	YDL078C	MDH3	Other
chr04:330666-330684;-	436.604	0.709653	0.324227	4.78562	0.0286983	0.0587481	YDL078C	MDH3	Other
chr04:332547-332576;-	73.3045	-2.78769	0.698817	23.5776	1.19973e-06	1.03351e-05	YDL077C	VAM6	Ime4p-dependent
chr04:335231-335257;-	49.7331	-1.07645	0.57452	3.86502	0.0493027	0.0921305	YDL076C	RXT3	Other
chr04:337846-337863;-	97.0714	0.103643	0.394032	0.0689328	0.792897	0.851711	snR63	snR63	Other
chr04:339000-339029;-	127.484	-0.158132	0.3083	0.265088	0.606646	0.700723	YDL074C	BRE1	Other
chr04:339032-339051;-	86.4351	-1.98245	0.556194	16.8332	4.08135e-05	0.000220741	YDL074C	BRE1	Ime4p-dependent
chr04:339054-339083;-	105.747	-1.85175	0.458694	20.9	4.8389e-06	3.46155e-05	YDL074C	BRE1	Ime4p-dependent
chr04:339092-339115;-	98.7593	-3.48141	0.745858	43.5624	4.10663e-11	1.09806e-09	YDL074C	BRE1	Ime4p-dependent
chr04:339140-339161;-	108.284	-1.09473	0.386111	8.94593	0.00278089	0.00832431	YDL074C	BRE1	Other
chr04:344366-344394;-	236.32	-1.58257	0.243455	48.5442	3.22926e-12	1.07106e-10	YDL072C	YET3	Ime4p-dependent
chr04:344415-344451;-	211.3	-0.683456	0.234891	8.74592	0.00310295	0.0091361	YDL072C	YET3	Other
chr04:344589-344641;-	282.574	0.0207032	0.192851	0.0115242	0.914511	0.940917	YDL072C	YET3	Other
chr04:345737-345755;+	1043.56	-1.85389	0.215229	89.942	2.45244e-21	3.76529e-19	YDL070W	BDF2	Ime4p-dependent
chr04:345826-345849;+	1580.56	-1.80277	0.307446	34.2875	4.75416e-09	7.87041e-08	YDL070W	BDF2	Ime4p-dependent
chr04:347426-347500;+	4376.24	-1.68922	0.208118	64.8491	8.08594e-16	4.99806e-14	YDL070W	BDF2	Ime4p-dependent
chr04:348699-348747;-	1875.93	0.751322	0.206817	13.243	0.000273594	0.00114276	YDL067C	COX9	Other
chr04:350479-350576;+	220.122	-0.997861	0.344833	8.36975	0.00381519	0.0108668	YDL066W	IDP1	Other
chr04:350864-350888;-	143.46	-0.0574221	0.312633	0.0338238	0.854082	0.897748	YDL065C	PEX19	Other
chr04:350942-350989;-	287.352	-0.746731	0.286891	6.83228	0.00895249	0.0223671	YDL065C	PEX19	Other
chr04:351088-351108;-	151.382	0.500459	0.305398	2.67148	0.102161	0.168335	YDL065C	PEX19	Other
chr04:351514-351540;-	164.672	0.24058	0.28881	0.689456	0.406349	0.515945	YDL065C	PEX19	Other
chr04:351661-351715;-	277.172	-1.34149	0.3798	12.6654	0.000372491	0.00148606	YDL065C	PEX19	Other
chr04:352545-352579;+	91.8219	0.521293	0.701113	0.550671	0.458044	0.566102	YDL064W	UBC9	Other
chr04:355156-355183;-	98.2778	-0.460032	0.347173	1.77565	0.182685	0.271885	YDL061C	RPS29B	Other
chr04:355312-355348;-	137.662	0.370847	0.283649	1.72232	0.189394	0.279467	YDL061C	RPS29B	Other
chr04:370132-370149;-	168.846	-0.703372	0.470951	2.24144	0.134356	0.21206	YDL055C	PSA1	Other
chr04:370182-370196;-	154.932	-1.23057	0.510499	6.01516	0.0141835	0.0329687	YDL055C	PSA1	Other
chr04:370202-370225;-	195.515	-1.89038	0.749258	6.23389	0.0125328	0.0297432	YDL055C	PSA1	Other
chr04:370244-370264;-	163.069	-1.07909	0.452963	5.84836	0.0155916	0.0355999	YDL055C	PSA1	Other
chr04:370266-370286;-	156.671	-0.916554	0.485533	3.62079	0.0570618	0.103738	YDL055C	PSA1	Other
chr04:370748-370781;-	196.162	0.291004	0.406064	0.512452	0.474079	0.582217	YDL055C	PSA1	Other
chr04:374486-374522;-	686.046	0.407233	0.270082	2.22992	0.135361	0.213187	YDL054C	MCH1	Other
chr04:374617-374640;-	741.069	0.498622	0.28398	3.05789	0.0803458	0.138028	YDL054C	MCH1	Other
chr04:374704-374720;-	630.065	0.399485	0.281618	1.95706	0.161828	0.246195	YDL054C	MCH1	Other
chr04:374815-374827;-	649.288	1.26883	0.255789	23.7169	1.11598e-06	9.76998e-06	YDL054C	MCH1	Other
chr04:374908-374928;-	660.403	1.53536	0.252191	36.1234	1.8521e-09	3.45013e-08	YDL054C	MCH1	Other
chr04:374936-374956;-	699.644	0.551698	0.241234	5.09487	0.0239968	0.0508516	YDL054C	MCH1	Other
chr04:375004-375038;-	723.714	1.43231	0.250974	31.988	1.55132e-08	2.27886e-07	YDL054C	MCH1	Other
chr04:375100-375119;-	712.274	0.937905	0.303955	9.46332	0.00209622	0.00656377	YDL054C	MCH1	Other
chr04:375247-375344;-	1049.68	0.983276	0.281282	12.1735	0.000484726	0.00187794	YDL054C	MCH1	Other
chr04:375462-375534;-	998.388	1.59231	0.186775	71.876	2.29159e-17	1.84861e-15	YDL054C	MCH1	Other
chr04:375624-375649;-	717.163	0.963656	0.28402	11.2597	0.000792086	0.0028636	YDL054C	MCH1	Other
chr04:375653-375687;-	708.158	0.868313	0.236744	13.0326	0.000306117	0.00125872	YDL054C	MCH1	Other
chr04:375699-375724;-	707.341	1.09027	0.243413	19.5432	9.83523e-06	6.38184e-05	YDL054C	MCH1	Other
chr04:375740-375791;-	840.852	0.959239	0.227958	17.433	2.97615e-05	0.00016843	YDL054C	MCH1	Other
chr04:376150-376218;-	245.585	1.15758	0.253013	20.894	4.85401e-06	3.46626e-05	YDL053C	PBP4	Other
chr04:376396-376434;-	180.879	0.816035	0.310213	6.81385	0.00904538	0.0225518	YDL053C	PBP4	Other
chr04:376439-376465;-	124.574	-0.0230017	0.420294	0.00299732	0.956339	0.971794	YDL053C	PBP4	Other
chr04:376535-376579;-	180.671	0.251688	0.309149	0.655604	0.418116	0.527928	YDL053C	PBP4	Other
chr04:376717-376742;-	139.475	1.05989	0.364509	8.34143	0.0038751	0.0110078	YDL053C	PBP4	Other
chr04:376770-376860;-	326.35	0.135164	0.233586	0.334555	0.562989	0.663582	YDL053C	PBP4	Other
chr04:378789-378885;+	177.587	-0.626987	0.351685	3.36139	0.0667416	0.118193	YDL051W	LHP1	Other
chr04:378922-378953;+	72.47	-1.54469	0.763501	5.39378	0.0202087	0.0442323	YDL051W	LHP1	Other
chr04:378982-379002;+	86.9743	0.686226	0.407384	2.68323	0.10141	0.167387	YDL051W	LHP1	Other
chr04:382250-382265;-	82.5579	0.623064	0.855878	0.531712	0.465888	0.574082	YDL048C	STP4	Other
chr04:382304-382321;-	97.4973	0.500812	0.445128	1.25541	0.262522	0.362691	YDL048C	STP4	Other
chr04:382473-382510;-	89.3825	-0.304064	0.47703	0.410394	0.521769	0.626795	YDL048C	STP4	Other
chr04:385135-385155;+	122.354	-1.17214	0.362303	11.3181	0.000767551	0.00278442	YDL047W	SIT4	Other
chr04:385216-385242;+	183.647	-0.790086	0.360734	4.84418	0.0277395	0.0571539	YDL047W	SIT4	Other
chr04:385266-385336;+	439.459	-1.28415	0.268765	23.0421	1.58493e-06	1.31419e-05	YDL047W	SIT4	Ime4p-dependent
chr04:385711-385732;+	596.428	1.21996	0.403397	9.08026	0.00258384	0.00784547	YDL046W	NPC2	Other
chr04:385786-385805;+	630.939	1.22768	0.169003	51.8609	5.9574e-13	2.23468e-11	YDL046W	NPC2	Other
chr04:385827-385844;+	579.516	0.961463	0.187717	25.4988	4.4266e-07	4.3173e-06	YDL046W	NPC2	Other
chr04:386302-386317;+	628.999	1.09858	0.169841	40.9351	1.57368e-10	3.66257e-09	YDL046W	NPC2	Other
chr04:386320-386355;+	901.759	1.0548	0.130371	64.5005	9.65097e-16	5.79585e-14	YDL046W	NPC2	Other
chr04:386418-386440;+	778.949	0.945181	0.142529	43.026	5.40183e-11	1.39728e-09	YDL046W	NPC2	Other
chr04:387105-387145;-	63.2676	-2.27443	0.570184	20.8113	5.06826e-06	3.60305e-05	YDL045C	FAD1	Ime4p-dependent
chr04:393788-393806;-	111.17	-2.42916	0.525346	29.6518	5.17049e-08	6.58874e-07	YDL040C	NAT1	Ime4p-dependent
chr04:393844-393866;-	116.996	-3.02413	0.579993	44.0447	3.2096e-11	8.7292e-10	YDL040C	NAT1	Ime4p-dependent
chr04:396673-396721;-	120.95	0.67114	0.374741	3.07712	0.079401	0.136725	YDL039C	PRM7	Other
chr04:396838-396858;-	116.202	1.18914	0.362837	10.1506	0.00144254	0.00477121	YDL039C	PRM7	Other
chr04:396884-396902;-	104.661	-0.714423	0.524088	2.03573	0.15364	0.236651	YDL039C	PRM7	Other
chr04:396911-396955;-	222.496	-0.815458	0.50383	2.64112	0.10413	0.171224	YDL039C	PRM7	Other
chr04:402833-402920;-	278.177	-1.67351	0.424539	15.5159	8.18155e-05	0.000405415	YDL035C	GPR1	Ime4p-dependent
chr04:404276-404333;-	168.731	-1.01173	0.765098	1.73752	0.187454	0.277249	YDL035C	GPR1	Other
chr04:410647-410672;+	91.0972	-2.11929	0.480694	25.8718	3.64869e-07	3.63685e-06	YDL031W	DBP10	Ime4p-dependent
chr04:410673-410714;+	188.533	-1.94083	0.311723	46.9734	7.19572e-12	2.20245e-10	YDL031W	DBP10	Ime4p-dependent
chr04:413287-413306;+	174.745	-1.6699	0.321549	32.0743	1.48389e-08	2.20019e-07	YDL029W	ARP2	Ime4p-dependent
chr04:413359-413377;+	173.517	-0.550767	0.277312	4.05858	0.0439475	0.0838685	YDL029W	ARP2	Other
chr04:413398-413418;+	140.427	-0.390096	0.323431	1.48143	0.223551	0.318894	YDL029W	ARP2	Other
chr04:413974-413990;+	128.072	0.116041	0.340851	0.115672	0.733776	0.805661	YDL029W	ARP2	Other
chr04:415923-415954;-	77.0209	-0.197635	0.53479	0.138817	0.70946	0.786645	YDL028C	MPS1	Other
chr04:416075-416143;-	152.043	-1.17555	0.381535	10.5998	0.00113099	0.0038754	YDL028C	MPS1	Other
chr04:417334-417371;-	141.178	-0.658504	0.314635	4.39174	0.0361135	0.0712256	YDL027C	YDL027C	Other
chr04:417375-417426;-	163.738	-1.53164	0.295802	28.7738	8.13425e-08	9.703e-07	YDL027C	YDL027C	Ime4p-dependent
chr04:419166-419212;-	182.122	-1.58365	0.291939	30.7645	2.91325e-08	3.9901e-07	YDL025C	RTK1	Ime4p-dependent
chr04:419220-419244;-	111.79	-2.73832	0.445963	47.3384	5.97301e-12	1.87647e-10	YDL025C	RTK1	Ime4p-dependent
chr04:419252-419268;-	133.406	-3.62236	0.485062	79.9141	3.91052e-19	4.04612e-17	YDL025C	RTK1	Ime4p-dependent
chr04:419274-419321;-	198.071	-3.15042	0.363194	90.5284	1.82342e-21	2.89286e-19	YDL025C	RTK1	Ime4p-dependent
chr04:422033-422098;-	174.121	1.1958	0.325396	13.7215	0.000212018	0.000915282	YDL024C	DIA3	Other
chr04:426163-426227;+	580.683	0.952509	0.302403	9.98472	0.00157844	0.00514562	YDL022W	GPD1	Other
chr04:426238-426251;+	264.137	1.05926	0.288837	13.8333	0.00019976	0.000869068	YDL022W	GPD1	Other
chr04:426590-426657;+	399.478	0.27687	0.231169	1.43784	0.230489	0.326541	YDL022W	GPD1	Other
chr04:426684-426700;+	211.425	0.868456	0.328101	7.17781	0.00738107	0.0190201	YDL022W	GPD1	Other
chr04:426703-426719;+	213.664	1.09841	0.345907	10.4511	0.00122577	0.00416124	YDL022W	GPD1	Other
chr04:428749-428827;-	437.512	0.936138	0.213386	19.2433	1.15075e-05	7.30755e-05	YDL020C	RPN4	Other
chr04:429032-429049;-	214.668	0.514021	0.394279	1.67658	0.195379	0.286832	YDL020C	RPN4	Other
chr04:429131-429151;-	229.539	0.747357	0.35082	4.50632	0.0337697	0.0672217	YDL020C	RPN4	Other
chr04:429563-429578;-	223.298	0.908307	0.36653	6.11903	0.0133734	0.031448	YDL020C	RPN4	Other
chr04:429732-429758;-	255.645	0.966246	0.313011	9.54075	0.0020096	0.00631331	YDL020C	RPN4	Other
chr04:429806-429871;-	381.892	0.973207	0.235898	17.06	3.62173e-05	0.000200089	YDL020C	RPN4	Other
chr04:429875-429899;-	249.194	0.984798	0.316118	9.71312	0.00182957	0.0058295	YDL020C	RPN4	Other
chr04:430029-430046;-	217.414	-0.0826215	0.392153	0.0445487	0.832836	0.882102	YDL020C	RPN4	Other
chr04:430062-430083;-	263.437	0.90651	0.306162	8.73004	0.00313009	0.00920951	YDL020C	RPN4	Other
chr04:430168-430193;-	237.963	1.49618	0.347594	19.1363	1.21707e-05	7.69787e-05	YDL020C	RPN4	Other
chr04:438284-438307;+	113.212	0.599664	0.461209	1.63342	0.20123	0.293475	YDL017W	CDC7	Other
chr04:438550-438606;+	149.66	0.319257	0.343837	0.844349	0.358156	0.465315	YDL017W	CDC7	Other
chr04:438693-438717;+	145.636	0.535027	0.353818	2.21793	0.136416	0.214494	YDL017W	CDC7	Other
chr04:438991-439008;+	100.65	-0.255059	0.602789	0.183506	0.668377	0.752751	YDL017W	CDC7	Other
chr04:439336-439350;+	97.9089	-1.37588	0.785011	3.78342	0.0517627	0.0959177	YDL017W	CDC7	Other
chr04:440117-440150;-	100.138	-2.13489	0.478091	24.6983	6.7044e-07	6.31248e-06	YDL015C	TSC13	Ime4p-dependent
chr04:440160-440176;-	95.2146	-2.52148	0.536003	29.9103	4.52496e-08	5.93293e-07	YDL015C	TSC13	Ime4p-dependent
chr04:440190-440216;-	148.119	-1.69746	0.324649	30.8571	2.77748e-08	3.82064e-07	YDL015C	TSC13	Ime4p-dependent
chr04:444889-444908;-	88.7127	0.384463	0.373395	1.02558	0.311198	0.415722	YDL012C	YDL012C	Other
chr04:444958-445005;-	162.39	0.674615	0.256288	6.6427	0.00995628	0.0245401	YDL012C	YDL012C	Other
chr04:446108-446149;+	655.671	-1.57488	0.179152	86.8841	1.1507e-20	1.52133e-18	YDL010W	GRX6	Ime4p-dependent
chr04:446428-446494;+	696.363	0.106127	0.22128	0.228894	0.632345	0.722518	YDL010W	GRX6	Other
chr04:446502-446522;+	349.343	0.101407	0.213733	0.224323	0.635765	0.725294	YDL010W	GRX6	Other
chr04:446714-446745;+	501.168	0.777405	0.172914	20.1362	7.21179e-06	4.89651e-05	YDL010W	GRX6	Other
chr04:447504-447544;+	179.208	-0.190571	0.435159	0.192065	0.661204	0.74653	YDL008W	APC11	Other
chr04:447558-447593;+	126.747	-0.410454	0.445834	0.857968	0.354308	0.46125	YDL008W	APC11	Other
chr04:450076-450136;-	89.4784	1.94597	0.594487	8.67733	0.00322193	0.00943388	YDL007C-A	YDL007C-A	Other
chr04:450211-450253;-	63.0365	1.86918	0.894538	3.75653	0.0526016	0.0971516	YDL007C-A	YDL007C-A	Other
chr04:451511-451535;+	392.809	1.24284	0.283331	18.8477	1.41579e-05	8.73986e-05	YDL007W	RPT2	Other
chr04:451997-452014;+	361.965	1.21925	0.27845	18.7302	1.50579e-05	9.23555e-05	YDL007W	RPT2	Other
chr04:452182-452198;+	337.233	0.700455	0.307254	5.06614	0.0243977	0.0514948	YDL007W	RPT2	Other
chr04:452322-452337;+	363.201	0.715119	0.280225	6.31978	0.0119398	0.0285494	YDL007W	RPT2	Other
chr04:452535-452551;+	340.978	0.0566938	0.318427	0.0315696	0.858976	0.901483	YDL007W	RPT2	Other
chr04:452569-452583;+	342.453	-0.645293	0.34931	3.62954	0.0567626	0.103386	YDL007W	RPT2	Other
chr04:452606-452619;+	413.639	0.238089	0.275911	0.735142	0.391221	0.500812	YDL007W	RPT2	Other
chr04:452627-452690;+	831.811	-0.464658	0.224888	4.28151	0.0385292	0.0751094	YDL007W	RPT2	Other
chr04:452711-452723;+	339.698	-0.0976748	0.325375	0.0908598	0.763087	0.830151	YDL007W	RPT2	Other
chr04:452768-452782;+	394.364	0.565008	0.270644	4.25013	0.0392474	0.0761974	YDL007W	RPT2	Other
chr04:454065-454083;+	79.894	-0.551952	0.470726	1.47596	0.224408	0.319686	YDL006W	PTC1	Other
chr04:454225-454242;+	77.1041	-2.72157	0.858549	17.7651	2.49927e-05	0.000144081	YDL006W	PTC1	Ime4p-dependent
chr04:454563-454584;-	116.997	-0.0952002	0.397001	0.0578626	0.809907	0.8641	YDL005C	MED2	Other
chr04:454748-454809;-	353.024	0.172628	0.2322	0.551894	0.457545	0.565755	YDL005C	MED2	Other
chr04:454840-454865;-	189.479	0.725012	0.2687	7.22315	0.00719695	0.0186112	YDL005C	MED2	Other
chr04:454869-454887;-	155.829	0.591555	0.315559	3.47128	0.062443	0.112002	YDL005C	MED2	Other
chr04:456625-456640;+	468.581	0.774804	0.200631	14.6336	0.000130565	0.0006045	YDL004W	ATP16	Other
chr04:456767-456785;+	339.676	0.761928	0.237478	9.86568	0.0016839	0.00543542	YDL004W	ATP16	Other
chr04:456986-457001;+	341.942	0.889308	0.227742	14.5614	0.000135666	0.000623868	YDL004W	ATP16	Other
chr04:463748-463787;-	359.712	-0.97169	0.2394	17.5456	2.80499e-05	0.000159407	YDR001C	NTH1	Other
chr04:463807-463843;-	353.371	-0.532781	0.23263	5.37485	0.0204291	0.044602	YDR001C	NTH1	Other
chr04:463875-463887;-	217.459	0.0473352	0.361279	0.0171429	0.89583	0.927283	YDR001C	NTH1	Other
chr04:463963-463980;-	220.033	-0.0108193	0.36498	0.000877928	0.976362	0.984325	YDR001C	NTH1	Other
chr04:464024-464044;-	200.943	-0.473933	0.436121	1.21987	0.269387	0.37067	YDR001C	NTH1	Other
chr04:464117-464134;-	242.483	0.666835	0.308346	4.66712	0.0307455	0.0622429	YDR001C	NTH1	Other
chr04:464139-464172;-	243.101	-0.0569455	0.313408	0.0330863	0.855664	0.899014	YDR001C	NTH1	Other
chr04:464321-464352;-	244.966	0.549743	0.307199	3.1822	0.0744442	0.129488	YDR001C	NTH1	Other
chr04:464438-464483;-	310.557	1.22635	0.249621	24.7392	6.56366e-07	6.21069e-06	YDR001C	NTH1	Other
chr04:465073-465100;-	236.562	0.61344	0.320003	3.65384	0.05594	0.102265	YDR001C	NTH1	Other
chr04:465645-465666;-	242.52	1.06636	0.318472	11.3709	0.000746019	0.00271459	YDR001C	NTH1	Other
chr04:466640-466652;+	288.342	0.476661	0.272958	2.94279	0.0862615	0.146185	YDR002W	YRB1	Other
chr04:466781-466809;+	436.424	0.835845	0.231648	12.6887	0.000367866	0.00146995	YDR002W	YRB1	Other
chr04:467217-467236;+	269.408	1.14799	0.266403	17.2224	3.32501e-05	0.000185309	YDR002W	YRB1	Other
chr04:467621-467644;+	99.3825	1.46936	0.38895	14.8739	0.00011494	0.000542081	YDR003W	RCR2	Other
chr04:469890-469920;+	87.387	-1.48086	0.490133	10.4661	0.00121585	0.00413346	YDR004W	RAD57	Other
chr04:470036-470062;+	83.6325	-0.764772	0.456372	2.94143	0.0863342	0.14623	YDR004W	RAD57	Other
chr04:470274-470319;-	229.37	0.838419	0.282085	8.89962	0.0028523	0.00850331	YDR005C	MAF1	Other
chr04:470408-470468;-	286.774	0.765217	0.231374	10.9697	0.00092613	0.00327118	YDR005C	MAF1	Other
chr04:470749-470785;-	158.022	-0.184374	0.368379	0.253375	0.614708	0.707718	YDR005C	MAF1	Other
chr04:471364-471387;-	155.472	0.471517	0.380376	1.52652	0.216636	0.310847	YDR005C	MAF1	Other
chr04:472045-472109;-	147.051	0.540858	0.337337	2.60299	0.106662	0.174754	YDR006C	SOK1	Other
chr04:472321-472397;-	150.996	-0.847143	0.333559	6.61893	0.01009	0.0248376	YDR006C	SOK1	Other
chr04:474144-474190;-	176.248	0.438331	0.29444	2.23529	0.134891	0.212729	YDR006C	SOK1	Other
chr04:475268-475306;-	96.2541	-0.66267	0.367351	3.42296	0.0642955	0.114698	YDR008C	YDR008C	Other
chr04:475316-475373;-	94.4438	-0.919862	0.383329	6.25106	0.0124119	0.0295003	YDR008C	YDR008C	Other
chr04:475426-475468;-	52.1201	-1.7029	0.649901	8.68057	0.00321621	0.00942003	YDR008C	YDR008C	Other
chr04:475892-475936;+	88.445	-0.36138	0.385654	0.887631	0.34612	0.452218	YDR007W	TRP1	Other
chr04:483989-484006;+	127.309	-2.58203	0.472644	39.1238	3.97775e-10	8.56656e-09	YDR011W	SNQ2	Ime4p-dependent
chr04:484018-484071;+	117.917	-2.39732	0.495517	29.7822	4.83412e-08	6.27776e-07	YDR011W	SNQ2	Ime4p-dependent
chr04:486389-486462;+	100.75	-0.225578	0.348141	0.420317	0.516779	0.622413	YDR012W	RPL4B	Other
chr04:491700-491762;+	1755.12	0.0628205	0.262758	0.0569965	0.811308	0.865002	YDR014W-A	HED1	Other
chr04:492684-492725;-	138.254	0.0900353	0.359063	0.0626627	0.802336	0.859007	YDR017C	KCS1	Other
chr04:496237-496255;-	353.249	1.12178	0.242471	20.9993	4.59458e-06	3.32086e-05	YDR018C	YDR018C	Other
chr04:496439-496473;-	430.817	1.11138	0.201571	29.8776	4.60196e-08	6.02559e-07	YDR018C	YDR018C	Other
chr04:496770-496808;-	396.557	-0.660634	0.248959	7.49695	0.00618037	0.0163283	YDR018C	YDR018C	Other
chr04:496823-496842;-	306.195	-0.90354	0.347316	7.50951	0.00613739	0.0162283	YDR018C	YDR018C	Other
chr04:496877-496906;-	446.603	0.302557	0.206371	2.12372	0.145034	0.225806	YDR018C	YDR018C	Other
chr04:497543-497568;-	350.293	-0.64733	0.285274	5.2678	0.0217234	0.0469114	YDR019C	GCV1	Other
chr04:497639-497671;-	387.445	1.18362	0.206501	33.2761	7.99591e-09	1.24659e-07	YDR019C	GCV1	Other
chr04:497687-497702;-	256.203	0.363291	0.300335	1.44439	0.229431	0.32538	YDR019C	GCV1	Other
chr04:497791-497808;-	266.446	0.721131	0.281578	6.48557	0.0108754	0.026429	YDR019C	GCV1	Other
chr04:498028-498048;-	278.951	0.68797	0.261831	6.83499	0.0089389	0.0223422	YDR019C	GCV1	Other
chr04:498087-498140;-	425.066	0.622212	0.188833	10.7337	0.00105202	0.00364418	YDR019C	GCV1	Other
chr04:498255-498297;-	312.494	-0.351951	0.247269	2.07498	0.149732	0.231606	YDR019C	GCV1	Other
chr04:498494-498526;-	275.599	0.432457	0.267687	2.57766	0.108382	0.177235	YDR019C	GCV1	Other
chr04:498569-498592;-	279.515	0.590031	0.267338	4.80649	0.0283528	0.058191	YDR019C	GCV1	Other
chr04:500478-500521;+	44.7507	-1.53182	0.874509	4.09302	0.0430605	0.0825067	YDR021W	FAL1	Other
chr04:503112-503134;+	139.888	0.384718	0.385084	0.974047	0.323673	0.428743	YDR023W	SES1	Other
chr04:503234-503251;+	184.568	0.854499	0.281452	8.94817	0.00277747	0.00832193	YDR023W	SES1	Other
chr04:503316-503330;+	204.92	0.249201	0.278301	0.787361	0.374899	0.483494	YDR023W	SES1	Other
chr04:504146-504169;+	173.948	1.30327	0.305612	17.8801	2.35265e-05	0.000136305	YDR023W	SES1	Other
chr04:511261-511280;-	225.631	0.929246	0.311756	9.30382	0.00228676	0.00706285	YDR028C	REG1	Other
chr04:511501-511521;-	231.98	-1.50479	0.321039	24.2859	8.30468e-07	7.57206e-06	YDR028C	REG1	Ime4p-dependent
chr04:511529-511546;-	205.607	-0.667507	0.328067	4.23509	0.0395966	0.0767658	YDR028C	REG1	Other
chr04:511548-511577;-	207.68	-1.84324	0.368689	29.5668	5.40224e-08	6.81111e-07	YDR028C	REG1	Ime4p-dependent
chr04:511980-512010;-	209.638	-0.325452	0.322052	1.02552	0.311213	0.415722	YDR028C	REG1	Other
chr04:512079-512110;-	264.205	-2.68905	0.336728	88.2713	5.70644e-21	8.23024e-19	YDR028C	REG1	Ime4p-dependent
chr04:512120-512144;-	264.599	-1.86883	0.294084	47.2932	6.1124e-12	1.91395e-10	YDR028C	REG1	Ime4p-dependent
chr04:512150-512182;-	309.069	-1.93779	0.259357	65.327	6.34465e-16	3.97334e-14	YDR028C	REG1	Ime4p-dependent
chr04:512826-512876;-	241.861	-1.86957	0.327209	37.6667	8.39272e-10	1.70342e-08	YDR028C	REG1	Ime4p-dependent
chr04:512970-512986;-	200.401	-0.0660256	0.344743	0.0366337	0.848213	0.892799	YDR028C	REG1	Other
chr04:516225-516293;-	73.9403	0.145816	0.433118	0.112222	0.737629	0.808927	YDR030C	RAD28	Other
chr04:517525-517604;-	601.945	-0.138096	0.27108	0.259143	0.61071	0.704306	YDR032C	PST2	Other
chr04:517936-517972;-	251.855	-0.00993701	0.300741	0.00109325	0.973623	0.982917	YDR032C	PST2	Other
chr04:518083-518101;-	365.939	0.810831	0.27922	8.62498	0.00331585	0.00964067	YDR032C	PST2	Other
chr04:518152-518182;-	413.078	0.650266	0.25845	6.43276	0.0112034	0.0271156	YDR032C	PST2	Other
chr04:518196-518223;-	331.136	0.81381	0.295318	7.78139	0.00527871	0.0142305	YDR032C	PST2	Other
chr04:521551-521605;+	363.98	1.19727	0.424345	7.98642	0.00471296	0.0129624	YDR033W	MRH1	Other
chr04:521828-521888;+	341.755	0.323516	0.271629	1.41971	0.233451	0.33	YDR033W	MRH1	Other
chr04:521943-521998;+	264.559	-0.229054	0.334479	0.470332	0.492834	0.598914	YDR033W	MRH1	Other
chr04:522525-522555;+	248.647	-0.117511	0.396093	0.0883321	0.766308	0.831966	YDR033W	MRH1	Other
chr04:522641-522677;+	263.845	0.25087	0.33559	0.559435	0.454488	0.562804	YDR033W	MRH1	Other
chr04:522727-522798;+	463.683	0.676444	0.29141	5.41761	0.0199346	0.0437634	YDR033W	MRH1	Other
chr04:522807-522846;+	284.902	0.740736	0.327319	5.20036	0.0225822	0.0484814	YDR033W	MRH1	Other
chr04:523402-523456;-	135.124	-1.30429	0.34207	15.8013	7.03541e-05	0.000356035	YDR034C	LYS14	Ime4p-dependent
chr04:524863-524899;-	115.973	-0.358044	0.364694	0.969427	0.324823	0.429861	YDR034C	LYS14	Other
chr04:528338-528359;+	293.48	1.1036	0.245502	19.7352	8.89492e-06	5.86945e-05	YDR034W-B	YDR034W-B	Other
chr04:528364-528381;+	234.944	0.479024	0.305735	2.39472	0.121746	0.195035	YDR034W-B	YDR034W-B	Other
chr04:528447-528491;+	464.839	0.985473	0.203796	23.2068	1.45483e-06	1.21906e-05	YDR034W-B	YDR034W-B	Other
chr04:528613-528637;+	313.325	0.757463	0.242208	9.61592	0.00192898	0.00609627	YDR034W-B	YDR034W-B	Other
chr04:528830-528851;+	97.2216	0.0327452	0.428126	0.0058319	0.939127	0.959107	YDR035W	ARO3	Other
chr04:529111-529147;+	140.483	1.29136	0.325075	16.2787	5.46747e-05	0.00028549	YDR035W	ARO3	Other
chr04:529713-529756;+	133.147	1.05704	0.329729	10.4334	0.00123754	0.00419098	YDR035W	ARO3	Other
chr04:529773-529854;+	261.392	1.31483	0.256244	26.8314	2.21999e-07	2.34854e-06	YDR035W	ARO3	Other
chr04:530198-530263;-	189.171	-0.751801	0.283112	7.70652	0.00550217	0.0147335	YDR036C	EHD3	Other
chr04:530496-530536;-	114.424	0.13003	0.360718	0.128514	0.719978	0.794836	YDR036C	EHD3	Other
chr04:533734-533751;+	90.7062	1.02316	0.358804	8.01951	0.00462762	0.0127608	YDR037W	KRS1	Other
chr04:533775-533816;+	223.413	1.53515	0.253219	37.0896	1.12824e-09	2.20794e-08	YDR037W	KRS1	Other
chr04:533824-533850;+	233.04	1.01791	0.243399	17.3771	3.06494e-05	0.000173044	YDR037W	KRS1	Other
chr04:533864-533876;+	135.402	1.04109	0.309761	11.2097	0.00081372	0.0029318	YDR037W	KRS1	Other
chr04:533892-533908;+	188.049	0.8648	0.389463	4.93761	0.0262784	0.0547361	YDR037W	KRS1	Other
chr04:534477-534555;-	158.152	0.119864	0.331069	0.13112	0.717273	0.79279	YDR040C	ENA1	Other
chr04:540938-541007;-	408.976	1.20555	0.246597	24.0555	9.35995e-07	8.34245e-06	snR47	snR47	Other
chr04:546807-546840;+	197.202	-1.51327	0.309861	28.7324	8.31004e-08	9.8879e-07	YDR044W	HEM13	Ime4p-dependent
chr04:546844-546882;+	160.358	-1.38708	0.377965	15.0373	0.00010541	0.000502955	YDR044W	HEM13	Ime4p-dependent
chr04:551256-551288;+	98.625	1.24631	0.356463	12.3007	0.0004528	0.00176575	YDR047W	HEM12	Other
chr04:551501-551515;+	64.7846	-0.50031	0.543878	0.885191	0.346784	0.452941	YDR047W	HEM12	Other
chr04:554960-555068;-	691.103	-0.482191	0.321581	2.23634	0.1348	0.212655	YDR050C	TPI1	Other
chr04:555072-555100;-	366.197	-0.0397576	0.383277	0.0107065	0.917588	0.943661	YDR050C	TPI1	Other
chr04:555283-555299;-	332.289	0.683456	0.402734	2.92501	0.0872168	0.147594	YDR050C	TPI1	Other
chr04:555596-555615;-	416.645	0.92796	0.734307	1.59347	0.206831	0.29976	YDR050C	TPI1	Other
chr04:556207-556293;-	190.988	-2.89011	0.291007	115.073	7.58341e-27	2.48919e-24	YDR051C	DET1	Ime4p-dependent
chr04:557723-557739;-	196.146	0.579513	0.341028	2.87009	0.09024	0.1519	YDR052C	DBF4	Other
chr04:557867-557892;-	247.431	0.756492	0.259487	8.49948	0.00355248	0.0102411	YDR052C	DBF4	Other
chr04:558526-558546;-	272.662	0.915588	0.241619	14.4626	0.000142973	0.000652737	YDR052C	DBF4	Other
chr04:558673-558712;-	280.446	0.615823	0.23474	6.84524	0.00888779	0.0222581	YDR052C	DBF4	Other
chr04:558949-558967;-	187.201	-0.774884	0.405802	3.89295	0.0484892	0.0908779	YDR052C	DBF4	Other
chr04:558986-559076;-	594.108	-1.01623	0.170925	37.0872	1.1296e-09	2.20794e-08	YDR052C	DBF4	Ime4p-dependent
chr04:560398-560438;-	379.2	1.03945	0.196739	28.0733	1.16806e-07	1.34123e-06	YDR054C	CDC34	Other
chr04:560513-560541;-	368.625	0.427435	0.199341	4.55277	0.0328656	0.0658488	YDR054C	CDC34	Other
chr04:560570-560590;-	291.102	0.0233104	0.250438	0.00865692	0.92587	0.950432	YDR054C	CDC34	Other
chr04:560693-560714;-	310.861	-0.083671	0.236031	0.126257	0.722345	0.797125	YDR054C	CDC34	Other
chr04:560761-560785;-	339.358	0.815197	0.212666	14.6298	0.00013083	0.000605433	YDR054C	CDC34	Other
chr04:560866-560895;-	359.908	1.24979	0.210031	36.0993	1.87512e-09	3.47262e-08	YDR054C	CDC34	Other
chr04:561006-561055;-	391.423	0.745205	0.195189	14.4506	0.000143886	0.000656275	YDR054C	CDC34	Other
chr04:561190-561217;-	341.16	1.06798	0.215171	24.7996	6.36091e-07	6.04286e-06	YDR054C	CDC34	Other
chr04:562703-562785;+	514.936	0.487878	0.432886	1.27315	0.259177	0.359113	YDR055W	PST1	Other
chr04:564011-564080;+	442.41	-1.96445	0.33377	34.1986	4.97645e-09	8.18149e-08	YDR055W	PST1	Ime4p-dependent
chr04:564081-564135;+	371.396	-2.00548	0.351633	32.2943	1.32498e-08	1.99565e-07	YDR055W	PST1	Ime4p-dependent
chr04:568415-568530;-	1640.72	0.414458	0.315962	1.72093	0.189573	0.279688	YDR059C	UBC5	Other
chr04:568704-568751;-	681.948	1.11706	0.264508	17.8128	2.43736e-05	0.000140613	YDR059C	UBC5	Other
chr04:572711-572754;+	134.408	0.698128	0.365736	3.54647	0.0596723	0.107845	YDR060W	MAK21	Other
chr04:577156-577173;+	213.161	-0.305579	0.320237	0.924264	0.336358	0.442359	YDR062W	LCB2	Other
chr04:577191-577216;+	225.472	-0.571573	0.306537	3.60224	0.0577019	0.104801	YDR062W	LCB2	Other
chr04:577226-577276;+	331.108	-1.56558	0.247646	46.5963	8.72259e-12	2.63588e-10	YDR062W	LCB2	Ime4p-dependent
chr04:577281-577323;+	301.287	-1.64501	0.271039	43.819	3.60187e-11	9.71282e-10	YDR062W	LCB2	Ime4p-dependent
chr04:577392-577411;+	197.303	-0.713514	0.36817	3.95544	0.0467202	0.0883033	YDR062W	LCB2	Other
chr04:583290-583316;+	108.418	-1.11137	0.39805	8.72964	0.00313079	0.00920951	YDR068W	DOS2	Other
chr04:583337-583368;+	95.3177	-1.77037	0.504836	15.6085	7.79022e-05	0.000388757	YDR068W	DOS2	Ime4p-dependent
chr04:583518-583573;+	195.337	1.12086	0.242688	21.542	3.4617e-06	2.58853e-05	YDR068W	DOS2	Other
chr04:583587-583610;+	102.78	0.656176	0.36137	3.26156	0.0709215	0.124237	YDR068W	DOS2	Other
chr04:583627-583652;+	108.933	0.627047	0.340946	3.34853	0.067265	0.118859	YDR068W	DOS2	Other
chr04:587272-587290;-	331.367	0.863119	0.309319	8.03192	0.004596	0.012681	YDR070C	FMP16	Other
chr04:587351-587372;-	287.339	0.207611	0.298903	0.486956	0.485288	0.592618	YDR070C	FMP16	Other
chr04:588190-588220;-	100.276	1.21551	0.378797	9.90409	0.00164912	0.00533847	YDR071C	PAA1	Other
chr04:588295-588337;-	141.986	0.613505	0.313658	3.71519	0.0539194	0.0992188	YDR071C	PAA1	Other
chr04:588502-588529;-	109.139	0.835504	0.368218	4.94031	0.0262373	0.0546808	YDR071C	PAA1	Other
chr04:591824-591863;+	71.2724	-0.819061	0.472575	3.32849	0.0680894	0.119982	YDR073W	SNF11	Other
chr04:591932-591963;+	60.3039	-0.228051	0.473568	0.237167	0.626259	0.717286	YDR073W	SNF11	Other
chr04:599964-600054;+	9657.87	0.454857	0.305649	2.21918	0.136305	0.214355	YDR077W	SED1	Other
chr04:600298-600392;+	10824.2	0.577199	0.256066	5.09329	0.0240185	0.0508609	YDR077W	SED1	Other
chr04:600409-600457;+	5753.53	0.408467	0.249128	2.69356	0.100754	0.166507	YDR077W	SED1	Other
chr04:600634-600679;+	5283.9	0.118816	0.305136	0.151699	0.696917	0.77581	YDR077W	SED1	Other
chr04:602539-602589;+	61.4709	0.241699	0.41339	0.337806	0.561098	0.661764	YDR079W	PET100	Other
chr04:602612-602633;-	56.2024	1.03354	0.4429	5.40335	0.0200981	0.0440207	YDR079C-A	TFB5	Other
chr04:614010-614034;-	124	0.273812	0.419424	0.419822	0.517026	0.62259	YDR085C	AFR1	Other
chr04:614255-614292;-	155.455	1.07688	0.313573	11.7082	0.000622269	0.00232381	YDR085C	AFR1	Other
chr04:615068-615100;-	178.227	1.30125	0.283532	21.189	4.16136e-06	3.03773e-05	YDR085C	AFR1	Other
chr04:615915-615977;-	308.959	0.926263	0.214387	18.8053	1.44764e-05	8.91341e-05	YDR086C	SSS1	Other
chr04:615994-616078;-	347.199	0.595921	0.213238	7.78271	0.00527486	0.0142242	YDR086C	SSS1	Other
chr04:616089-616106;-	139.108	0.744059	0.334334	4.9522	0.0260575	0.0543474	YDR086C	SSS1	Other
chr04:616267-616322;-	266.146	0.867016	0.222868	15.2064	9.63747e-05	0.000464737	YDR086C	SSS1	Other
chr04:623803-623832;+	68.1782	-1.69508	0.612748	9.00113	0.00269813	0.00813283	YDR089W	YDR089W	Other
chr04:623852-623868;-	127.445	-2.95447	0.641714	32.0622	1.49314e-08	2.21045e-07	YDR090C	YDR090C	Ime4p-dependent
chr04:623872-623913;-	158.836	-1.6666	0.373888	22.6403	1.9534e-06	1.56651e-05	YDR090C	YDR090C	Ime4p-dependent
chr04:624008-624062;-	159.3	-0.437457	0.333091	1.74515	0.186488	0.276077	YDR090C	YDR090C	Other
chr04:624254-624282;-	174.527	-0.315441	0.310191	1.03962	0.307911	0.412469	YDR090C	YDR090C	Other
chr04:625682-625700;-	102.489	-1.0946	0.640029	3.4662	0.0626351	0.112284	YDR091C	RLI1	Other
chr04:629447-629559;+	357.077	-0.328215	0.206539	2.57099	0.10884	0.177801	YDR092W	UBC13	Other
chr04:629577-629590;+	97.0751	-0.177275	0.395073	0.204482	0.651127	0.73813	YDR092W	UBC13	Other
chr04:629599-629618;+	96.1163	-0.840361	0.442245	3.9837	0.0459424	0.0871167	YDR092W	UBC13	Other
chr04:638263-638278;+	143.683	0.513867	0.430562	1.42551	0.232498	0.328897	YDR096W	GIS1	Other
chr04:638296-638352;+	315.488	-0.209881	0.276072	0.581285	0.445809	0.554799	YDR096W	GIS1	Other
chr04:638390-638421;+	194.468	-0.707726	0.373837	3.66552	0.0555492	0.101672	YDR096W	GIS1	Other
chr04:638447-638468;+	135.755	-2.68235	0.839608	12.0175	0.000527034	0.00201966	YDR096W	GIS1	Other
chr04:638509-638537;+	144.215	-1.20072	0.493062	6.44642	0.0111176	0.0269285	YDR096W	GIS1	Other
chr04:643637-643654;-	71.6571	-3.1327	0.85828	25.5777	4.24912e-07	4.16126e-06	YDR098C	YDR098C	Ime4p-dependent
chr04:647282-647309;+	3172.02	-1.42002	0.189064	56.1558	6.69498e-14	2.8968e-12	YDR099W	BMH2	Ime4p-dependent
chr04:647333-647345;+	1501.96	-1.28471	0.247836	27.15	1.88267e-07	2.04346e-06	YDR099W	BMH2	Ime4p-dependent
chr04:648043-648068;+	85.2205	-1.08528	0.654213	3.19808	0.0737246	0.128414	YDR100W	TVP15	Other
chr04:648078-648095;+	76.3752	-0.156806	0.566988	0.0779576	0.780085	0.842528	YDR100W	TVP15	Other
chr04:648107-648135;+	107.194	0.129777	0.434227	0.0881044	0.766601	0.832072	YDR100W	TVP15	Other
chr04:649339-649385;-	71.071	-0.234354	0.580079	0.16774	0.682128	0.763185	YDR101C	ARX1	Other
chr04:650308-650369;-	61.8375	-0.963523	0.779238	1.78532	0.181497	0.270582	YDR101C	ARX1	Other
chr04:658404-658434;-	72.5918	-0.888173	0.426128	4.46817	0.034532	0.068512	YDR105C	TMS1	Other
chr04:670384-670478;+	134.328	-1.32903	0.292124	22.5312	2.06761e-06	1.65114e-05	YDR110W	FOB1	Ime4p-dependent
chr04:670924-670944;-	332.175	-3.05296	0.469068	81.567	1.69423e-19	1.83266e-17	YDR111C	ALT2	Ime4p-dependent
chr04:670946-670960;-	252.648	-2.46448	0.498227	40.3166	2.15971e-10	4.82589e-09	YDR111C	ALT2	Ime4p-dependent
chr04:670961-670976;-	314.647	-2.50708	0.415457	60.186	8.63058e-15	4.46492e-13	YDR111C	ALT2	Ime4p-dependent
chr04:671005-671045;-	308.845	-1.09466	0.285924	17.1973	3.36923e-05	0.000187116	YDR111C	ALT2	Ime4p-dependent
chr04:671163-671191;-	322.448	-0.396778	0.239877	2.87015	0.0902363	0.1519	YDR111C	ALT2	Other
chr04:671202-671220;-	288.947	-0.587583	0.26878	5.15979	0.0231157	0.0494148	YDR111C	ALT2	Other
chr04:673126-673150;-	199.838	-0.946388	0.406598	5.66667	0.0172903	0.0387575	YDR113C	PDS1	Other
chr04:673206-673232;-	157.766	-0.899114	0.387877	5.9368	0.0148279	0.0342175	YDR113C	PDS1	Other
chr04:673293-673338;-	190.904	0.251641	0.292983	0.728185	0.393472	0.503219	YDR113C	PDS1	Other
chr04:673561-673582;-	139.928	-0.242863	0.380728	0.415876	0.519002	0.624333	YDR113C	PDS1	Other
chr04:673590-673611;-	126.61	-0.219607	0.409191	0.294553	0.587317	0.684293	YDR113C	PDS1	Other
chr04:674053-674091;-	199.777	0.481633	0.285872	2.78928	0.0948971	0.158423	YDR113C	PDS1	Other
chr04:674857-674905;+	58.6244	0.164713	0.437996	0.139654	0.708625	0.785959	YDR115W	YDR115W	Other
chr04:675965-675989;-	52.321	-1.62776	0.503614	12.1889	0.000480751	0.00186634	YDR116C	MRPL1	Other
chr04:683609-683683;+	5637.81	-0.41929	0.200934	4.33548	0.037326	0.0731986	YDR119W-A	COX26	Other
chr04:683938-683958;+	2616.08	1.09144	0.328494	11.0517	0.000886074	0.00314944	YDR119W-A	COX26	Other
chr04:684049-684076;+	4267.65	1.32457	0.270978	23.9167	1.00595e-06	8.89102e-06	YDR119W-A	COX26	Other
chr04:686215-686235;+	177.993	0.580128	0.274095	4.25755	0.0390763	0.0759582	YDR121W	DPB4	Other
chr04:686527-686542;+	141.226	0.244674	0.329168	0.538291	0.463142	0.571216	YDR121W	DPB4	Other
chr04:686544-686559;+	163.223	0.660316	0.283797	5.11536	0.0237149	0.0503776	YDR121W	DPB4	Other
chr04:686617-686663;+	354.59	0.659501	0.188613	11.7639	0.0006039	0.00226766	YDR121W	DPB4	Other
chr04:686683-686750;+	569.229	1.11339	0.156476	49.3825	2.10613e-12	7.29028e-11	YDR121W	DPB4	Other
chr04:704359-704381;+	86.4879	-2.27133	0.604232	19.1026	1.23875e-05	7.8298e-05	YDR128W	MTC5	Ime4p-dependent
chr04:705609-705710;+	99.4334	-0.882791	0.415177	4.8054	0.0283707	0.0582154	YDR128W	MTC5	Other
chr04:706583-706640;-	201.116	0.740899	0.328664	5.13287	0.0234769	0.0499861	YDR129C	SAC6	Other
chr04:707690-707792;-	209.931	-0.0852272	0.299404	0.0810112	0.775932	0.83959	YDR129C	SAC6	Other
chr04:708532-708564;-	76.8684	1.21825	0.397844	8.80461	0.0030047	0.00890742	YDR130C	FIN1	Other
chr04:708654-708700;-	85.2802	0.328419	0.391777	0.681398	0.409106	0.518822	YDR130C	FIN1	Other
chr04:709059-709108;-	85.6379	0.975482	0.365172	6.72119	0.00952741	0.0236114	YDR130C	FIN1	Other
chr04:712445-712462;-	89.7267	-0.120654	0.411342	0.0866782	0.768443	0.833502	YDR132C	YDR132C	Other
chr04:712469-712483;-	74.4314	-1.79082	0.64385	10.0556	0.00151889	0.00497875	YDR132C	YDR132C	Other
chr04:712498-712512;-	102.047	-1.86714	0.504101	17.8251	2.42161e-05	0.00013979	YDR132C	YDR132C	Ime4p-dependent
chr04:712535-712564;-	149.309	-2.89396	0.514239	51.0748	8.89104e-13	3.25515e-11	YDR132C	YDR132C	Ime4p-dependent
chr04:726238-726254;-	52.0975	-2.88852	0.68728	28.1796	1.10564e-07	1.27726e-06	YDR139C	RUB1	Ime4p-dependent
chr04:726255-726278;-	65.7955	-1.75171	0.442348	18.9761	1.32364e-05	8.29329e-05	YDR139C	RUB1	Ime4p-dependent
chr04:733515-733553;-	121.568	-1.11806	0.370571	9.71199	0.0018307	0.00582993	YDR142C	PEX7	Other
chr04:733585-733608;-	98.6985	-0.868212	0.410929	4.68145	0.03049	0.0618047	YDR142C	PEX7	Other
chr04:734928-734982;-	88.5839	-0.483393	0.37872	1.6514	0.198769	0.290732	YDR143C	SAN1	Other
chr04:734986-735006;-	72.1381	-1.16101	0.454553	7.06054	0.00788004	0.02011	YDR143C	SAN1	Other
chr04:739399-739436;+	145.883	0.227865	0.328993	0.478205	0.489237	0.595911	YDR145W	TAF12	Other
chr04:739895-739943;+	207.649	0.980895	0.275701	12.7895	0.000348575	0.00140478	YDR145W	TAF12	Other
chr04:740257-740290;+	152.577	0.573276	0.364867	2.45025	0.117506	0.189583	YDR145W	TAF12	Other
chr04:740361-740389;+	156.992	-0.569561	0.333018	3.01466	0.0825149	0.141143	YDR145W	TAF12	Other
chr04:740435-740454;+	216.706	0.814133	0.263337	9.57513	0.00197231	0.00621053	YDR145W	TAF12	Other
chr04:740794-740823;+	141.075	0.0450165	0.343163	0.01722	0.895597	0.927283	YDR145W	TAF12	Other
chr04:740948-740966;+	120.081	-0.0103809	0.399738	0.00067486	0.979275	0.986216	YDR145W	TAF12	Other
chr04:746187-746206;-	694.061	0.967122	0.215747	19.6535	9.28318e-06	6.06621e-05	YDR148C	KGD2	Other
chr04:746233-746265;-	720.349	0.478919	0.197254	5.74803	0.0165071	0.0372968	YDR148C	KGD2	Other
chr04:746272-746361;-	1306.95	0.65283	0.167417	15.1559	9.89896e-05	0.000476863	YDR148C	KGD2	Other
chr04:746437-746456;-	657.65	1.36501	0.21302	40.1429	2.36053e-10	5.26227e-09	YDR148C	KGD2	Other
chr04:746546-746569;-	696.423	1.61149	0.19966	64.6473	8.95796e-16	5.46608e-14	YDR148C	KGD2	Other
chr04:747020-747042;-	696.966	0.746683	0.37946	3.85702	0.0495381	0.0924252	YDR148C	KGD2	Other
chr04:747053-747135;-	1271.11	0.854539	0.273758	9.72317	0.0018196	0.00580454	YDR148C	KGD2	Other
chr04:747338-747351;-	633.156	0.776063	0.242784	9.84874	0.00169948	0.00548013	YDR148C	KGD2	Other
chr04:747371-747402;-	695.401	0.748971	0.248726	8.94605	0.0027807	0.00832431	YDR148C	KGD2	Other
chr04:747416-747434;-	712.305	1.5341	0.382868	15.9822	6.39416e-05	0.000327589	YDR148C	KGD2	Other
chr04:747565-747583;-	633.454	0.669122	0.234856	7.83739	0.00511764	0.0138868	YDR148C	KGD2	Other
chr04:747702-747745;-	900.733	0.712053	0.169813	17.2307	3.31052e-05	0.000184718	YDR148C	KGD2	Other
chr04:755593-755631;+	198.9	-0.593647	0.492365	1.47854	0.224003	0.3193	YDR150W	NUM1	Other
chr04:755695-755734;+	216.258	-0.0845979	0.407766	0.0429801	0.835763	0.883664	YDR150W	NUM1	Other
chr04:755746-755781;+	206.147	-0.484694	0.452357	1.16014	0.281436	0.384359	YDR150W	NUM1	Other
chr04:756377-756402;+	235.829	0.228864	0.357037	0.41095	0.521488	0.626549	YDR150W	NUM1	Other
chr04:756434-756468;+	226.975	-0.18932	0.381276	0.246586	0.619489	0.712102	YDR150W	NUM1	Other
chr04:756471-756532;+	334.846	-0.906813	0.277554	10.9156	0.000953602	0.00335452	YDR150W	NUM1	Other
chr04:757064-757103;-	42.5353	-1.08252	0.558173	4.19714	0.0404921	0.0781834	YDR151C	CTH1	Other
chr04:757581-757608;-	34.995	-3.20069	1.05978	16.8914	3.95803e-05	0.000215417	YDR151C	CTH1	Ime4p-dependent
chr04:759045-759069;+	99.5272	-1.40067	0.431784	11.3664	0.000747827	0.00272012	YDR152W	GIR2	Other
chr04:759112-759127;+	58.0165	-1.66726	0.558506	10.6318	0.00111158	0.00382406	YDR152W	GIR2	Other
chr04:759687-759792;-	287.027	-0.807289	0.237143	11.8933	0.000563362	0.00213311	YDR153C	ENT5	Other
chr04:759797-759834;-	146.144	0.594776	0.341102	3.042	0.0811361	0.139129	YDR153C	ENT5	Other
chr04:763607-763645;+	167.523	0.927821	0.302633	9.45995	0.00210007	0.00657151	YDR158W	HOM2	Other
chr04:764031-764058;+	124.865	0.234137	0.356759	0.428351	0.512799	0.617969	YDR158W	HOM2	Other
chr04:764104-764138;+	118.246	-0.207436	0.400422	0.270963	0.602687	0.697674	YDR158W	HOM2	Other
chr04:768361-768408;+	56.3209	-2.27652	0.614699	17.656	2.64673e-05	0.000151135	YDR159W	SAC3	Ime4p-dependent
chr04:770356-770416;+	85.0723	-1.45918	0.545091	8.48073	0.00358927	0.01033	YDR160W	SSY1	Other
chr04:770542-770576;+	123.421	0.703381	0.319901	4.84119	0.0277877	0.0572193	YDR160W	SSY1	Other
chr04:771246-771283;+	144.222	-0.627624	0.306405	4.37297	0.0365134	0.071852	YDR160W	SSY1	Other
chr04:771313-771335;+	81.332	-1.1464	0.557212	4.75165	0.0292701	0.0597005	YDR160W	SSY1	Other
chr04:772958-773017;-	119.852	-0.0716063	0.3412	0.0439865	0.833879	0.882554	YDR162C	NBP2	Other
chr04:774132-774179;+	144.741	0.0624897	0.303775	0.0422844	0.837079	0.88476	YDR163W	CWC15	Other
chr04:774222-774240;+	115.939	0.41583	0.330223	1.59564	0.206522	0.299495	YDR163W	CWC15	Other
chr04:774346-774403;+	298.402	0.289705	0.300461	0.932294	0.334267	0.440134	YDR163W	CWC15	Other
chr04:774466-774506;+	148.524	-0.563336	0.316775	3.18178	0.0744636	0.129488	YDR163W	CWC15	Other
chr04:778979-779050;-	194.235	-1.30301	0.338775	16.5157	4.82499e-05	0.000256158	YDR166C	SEC5	Ime4p-dependent
chr04:779092-779137;-	184.619	0.928087	0.296766	9.8179	0.00172822	0.00555024	YDR166C	SEC5	Other
chr04:779178-779205;-	144.555	0.478273	0.357906	1.76985	0.183401	0.272568	YDR166C	SEC5	Other
chr04:779381-779404;-	159.164	0.259508	0.327802	0.622726	0.430036	0.538762	YDR166C	SEC5	Other
chr04:779518-779550;-	139.026	-0.472046	0.38849	1.52523	0.21683	0.311031	YDR166C	SEC5	Other
chr04:779570-779582;-	108.365	-1.21488	0.624913	4.3226	0.0376095	0.0735878	YDR166C	SEC5	Other
chr04:779591-779648;-	204.421	-0.92864	0.296924	10.4921	0.00119883	0.00408436	YDR166C	SEC5	Other
chr04:779866-779900;-	145.061	-0.701937	0.397077	3.29075	0.0696711	0.122475	YDR166C	SEC5	Other
chr04:782055-782101;+	305.008	-1.92089	0.325702	36.6199	1.43556e-09	2.73903e-08	YDR167W	TAF10	Ime4p-dependent
chr04:782156-782184;+	122.805	-1.03787	0.642325	2.63717	0.104389	0.171531	YDR167W	TAF10	Other
chr04:782251-782291;+	219.606	-0.562266	0.253121	5.05567	0.0245455	0.0517474	YDR167W	TAF10	Other
chr04:783428-783448;+	246.433	0.634922	0.286307	4.81986	0.0281336	0.057816	YDR168W	CDC37	Other
chr04:784020-784047;+	273.211	0.241053	0.254975	0.884326	0.347019	0.453187	YDR168W	CDC37	Other
chr04:784225-784241;+	275.027	0.0287102	0.265583	0.0116517	0.914041	0.94071	YDR168W	CDC37	Other
chr04:784247-784264;+	254.408	-0.400852	0.290739	1.96516	0.160963	0.245271	YDR168W	CDC37	Other
chr04:784271-784318;+	449.357	-1.31401	0.214284	42.9799	5.5304e-11	1.42666e-09	YDR168W	CDC37	Ime4p-dependent
chr04:784335-784350;+	243.396	0.0206475	0.292625	0.00497742	0.943755	0.96246	YDR168W	CDC37	Other
chr04:784352-784381;+	313.214	-0.0819371	0.238306	0.118587	0.730572	0.803132	YDR168W	CDC37	Other
chr04:784715-784740;-	178.505	0.218793	0.318329	0.469892	0.493037	0.599083	YDR169C	STB3	Other
chr04:784965-784999;-	171.991	0.649797	0.85894	0.575541	0.448066	0.557217	YDR169C	STB3	Other
chr04:785087-785102;-	145.176	0.135165	0.394054	0.117243	0.732044	0.804471	YDR169C	STB3	Other
chr04:785515-785539;-	144.343	0.425373	0.396299	1.14568	0.284456	0.38765	YDR169C	STB3	Other
chr04:785564-785660;-	455.325	0.916024	0.267893	11.7395	0.000611873	0.00229128	YDR169C	STB3	Other
chr04:785942-785970;-	188.825	0.897644	0.30423	8.79603	0.00301887	0.00892997	YDR169C	STB3	Other
chr04:786348-786366;-	150.462	0.56906	0.376417	2.27877	0.131156	0.207636	YDR169C	STB3	Other
chr04:786410-786449;-	179.343	0.924256	0.332254	7.8098	0.00519636	0.0140643	YDR169C	STB3	Other
chr04:791050-791099;-	152.546	-1.37992	0.488392	8.64532	0.00327902	0.0095511	YDR170C	SEC7	Other
chr04:794062-794096;-	154.655	-4.06177	0.877001	42.7973	6.07145e-11	1.55779e-09	YDR170C	SEC7	Ime4p-dependent
chr04:794122-794151;-	195.665	-2.41959	0.418157	41.359	1.26684e-10	3.05292e-09	YDR170C	SEC7	Ime4p-dependent
chr04:797623-797659;+	574.112	0.750379	0.472686	2.52952	0.111734	0.181716	YDR171W	HSP42	Other
chr04:797677-797694;+	240.492	0.045306	0.344897	0.0172818	0.895411	0.927283	YDR171W	HSP42	Other
chr04:797866-797906;+	516.961	0.965307	0.395809	5.98169	0.0144551	0.0335116	YDR171W	HSP42	Other
chr04:798000-798043;+	375.53	0.599808	0.408746	2.16366	0.141308	0.220836	YDR171W	HSP42	Other
chr04:798386-798404;+	254.747	0.855288	0.369332	5.37522	0.0204248	0.044602	YDR171W	HSP42	Other
chr04:799412-799443;+	133.656	0.2795	0.435937	0.404544	0.524752	0.629583	YDR172W	SUP35	Other
chr04:799565-799627;+	198.069	0.582391	0.271301	4.50651	0.033766	0.0672217	YDR172W	SUP35	Other
chr04:799636-799684;+	215.728	0.503247	0.250742	3.94523	0.0470045	0.088689	YDR172W	SUP35	Other
chr04:799721-799749;+	143.102	0.404474	0.392876	1.03858	0.308153	0.412677	YDR172W	SUP35	Other
chr04:799956-800004;+	159.993	-0.175106	0.358908	0.241394	0.623201	0.714988	YDR172W	SUP35	Other
chr04:800838-800858;+	128.952	0.067695	0.464465	0.0211465	0.884381	0.9201	YDR172W	SUP35	Other
chr04:801547-801574;-	177.93	-0.0667455	0.316661	0.0445873	0.832765	0.882102	YDR173C	ARG82	Other
chr04:801625-801640;-	100.399	0.0121101	0.387686	0.000977213	0.975062	0.983742	YDR173C	ARG82	Other
chr04:801749-801774;-	108.416	-0.261693	0.384888	0.471591	0.492256	0.598364	YDR173C	ARG82	Other
chr04:803543-803568;+	66.4854	-1.37984	0.519712	7.77314	0.00530287	0.0142876	YDR174W	HMO1	Other
chr04:807240-807269;+	84.5287	-1.51103	0.425541	13.8257	0.00020057	0.00087179	YDR176W	NGG1	Ime4p-dependent
chr04:807300-807357;+	190.217	-1.78693	0.255884	54.8573	1.29609e-13	5.31788e-12	YDR176W	NGG1	Ime4p-dependent
chr04:807610-807636;+	183.487	1.28863	0.269859	22.0479	2.65932e-06	2.04641e-05	YDR177W	UBC1	Other
chr04:808054-808069;+	122.263	-0.0279675	0.409313	0.00466205	0.945563	0.964086	YDR177W	UBC1	Other
chr04:808139-808154;+	177.639	0.374067	0.305034	1.47066	0.225242	0.32049	YDR177W	UBC1	Other
chr04:808201-808213;+	143.079	-1.9683	1.08822	3.26378	0.0708256	0.124137	YDR177W	UBC1	Other
chr04:808707-808725;+	1765.47	0.804177	0.330097	5.92987	0.0148863	0.0343356	YDR178W	SDH4	Other
chr04:808737-808755;+	1792	1.08168	0.299327	13.0132	0.000309307	0.00127019	YDR178W	SDH4	Other
chr04:808760-808779;+	1907.15	0.8248	0.218132	14.2107	0.000163441	0.000736994	YDR178W	SDH4	Other
chr04:808813-808837;+	2320.28	0.956205	0.19884	23.0733	1.55941e-06	1.29627e-05	YDR178W	SDH4	Other
chr04:809237-809365;+	4270.59	1.26787	0.132441	91.4574	1.1402e-21	1.93813e-19	YDR178W	SDH4	Other
chr04:809444-809506;-	180.539	-0.947943	0.305297	9.91591	0.00163856	0.00531248	YDR179C	CSN9	Other
chr04:809519-809540;-	67.2325	-1.15403	0.472607	6.5127	0.0107107	0.0261222	YDR179C	CSN9	Other
chr04:812445-812463;+	317.808	1.06694	0.44487	5.53861	0.0186014	0.0412647	YDR180W	SCC2	Other
chr04:812720-812780;+	454.202	-0.664203	0.357613	3.50329	0.0612472	0.110252	YDR180W	SCC2	Other
chr04:814114-814154;+	377.09	0.807243	0.330374	5.85517	0.0155313	0.035505	YDR180W	SCC2	Other
chr04:814530-814555;+	339.946	0.638896	0.401644	2.48573	0.114883	0.185982	YDR180W	SCC2	Other
chr04:814561-814608;+	432.11	0.503716	0.335704	2.2318	0.135196	0.212997	YDR180W	SCC2	Other
chr04:815018-815069;+	399.237	-0.281689	0.350167	0.65455	0.418491	0.52819	YDR180W	SCC2	Other
chr04:815185-815209;+	354.048	1.03683	0.358498	8.13623	0.00433893	0.0120838	YDR180W	SCC2	Other
chr04:815260-815278;+	338.71	1.35506	0.387766	11.9323	0.000551695	0.00209811	YDR180W	SCC2	Other
chr04:815343-815369;+	333.254	-0.0667708	0.431644	0.0240661	0.876717	0.914973	YDR180W	SCC2	Other
chr04:815458-815495;+	373.482	0.498118	0.36087	1.8705	0.171417	0.25798	YDR180W	SCC2	Other
chr04:815698-815732;+	379.558	0.855326	0.335839	6.33266	0.0118534	0.0283642	YDR180W	SCC2	Other
chr04:816314-816338;+	342.747	1.15799	0.381013	8.97529	0.00273654	0.00822259	YDR180W	SCC2	Other
chr04:816388-816421;+	372.26	1.0829	0.334225	10.2319	0.00138035	0.00459907	YDR180W	SCC2	Other
chr04:817390-817427;-	86.0999	0.0978784	0.388699	0.0633282	0.801311	0.858324	YDR181C	SAS4	Other
chr04:818555-818596;+	169.674	0.289507	0.312505	0.865377	0.352238	0.45912	YDR182W	CDC1	Other
chr04:819243-819266;+	115.049	-1.20655	0.427114	8.35066	0.00385547	0.0109586	YDR182W	CDC1	Other
chr04:819280-819317;+	130.377	-0.189066	0.369207	0.261401	0.609159	0.702966	YDR182W	CDC1	Other
chr04:823776-823791;-	183.916	0.37623	0.309031	1.47508	0.224546	0.319787	YDR186C	YDR186C	Other
chr04:824303-824322;-	169.819	0.424532	0.34278	1.52617	0.216688	0.310875	YDR186C	YDR186C	Other
chr04:824542-824563;-	168.541	0.0167896	0.351303	0.00228332	0.961888	0.97583	YDR186C	YDR186C	Other
chr04:824807-824864;-	264.998	0.0305851	0.229033	0.0178058	0.893847	0.926405	YDR186C	YDR186C	Other
chr04:824873-824896;-	263.349	0.823217	0.228536	13.0833	0.000297938	0.00123123	YDR186C	YDR186C	Other
chr04:828385-828422;+	131.451	0.345141	0.388627	0.786202	0.375251	0.483751	YDR188W	CCT6	Other
chr04:828431-828462;+	119.021	-0.292083	0.43299	0.459835	0.497701	0.603595	YDR188W	CCT6	Other
chr04:828522-828571;+	143.215	-1.42337	0.402517	14.1227	0.000171265	0.000766105	YDR188W	CCT6	Ime4p-dependent
chr04:828572-828601;+	143.732	-0.0941625	0.359311	0.0689153	0.792923	0.851711	YDR188W	CCT6	Other
chr04:828872-828907;+	145.573	-0.390226	0.3558	1.22311	0.268752	0.369956	YDR188W	CCT6	Other
chr04:828933-828981;+	194.355	-0.172537	0.286457	0.365212	0.545626	0.648254	YDR188W	CCT6	Other
chr04:830875-830909;+	119.143	-1.67384	0.356879	23.6099	1.1798e-06	1.01911e-05	YDR189W	SLY1	Ime4p-dependent
chr04:830956-830970;+	84.6017	-1.31427	0.469758	8.11434	0.00439165	0.0122056	YDR189W	SLY1	Other
chr04:831347-831369;-	95.0301	-1.91916	0.489259	17.3066	3.18079e-05	0.000178631	YDR190C	RVB1	Ime4p-dependent
chr04:831397-831433;-	118.5	-2.02368	0.407303	27.762	1.37191e-07	1.54001e-06	YDR190C	RVB1	Ime4p-dependent
chr04:831525-831558;-	147.207	-0.883404	0.309949	8.18758	0.00421782	0.0117913	YDR190C	RVB1	Other
chr04:831581-831615;-	116.516	-0.807657	0.362747	4.98598	0.0255534	0.05346	YDR190C	RVB1	Other
chr04:836737-836769;-	85.8863	-0.189165	0.419425	0.206517	0.649511	0.736825	YDR194C	MSS116	Other
chr04:836847-836880;-	95.774	-0.826954	0.42048	4.22145	0.0399159	0.0772276	YDR194C	MSS116	Other
chr04:840844-840895;+	67.0305	0.381666	0.434562	0.762886	0.382427	0.491448	YDR195W	REF2	Other
chr04:841151-841193;-	97.3501	0.548293	0.388982	1.96191	0.161309	0.245563	YDR196C	CAB5	Other
chr04:841556-841582;-	93.8695	-0.782121	0.445542	3.25885	0.0710389	0.124351	YDR196C	CAB5	Other
chr04:841610-841633;-	74.6959	0.553216	0.444637	1.52827	0.216373	0.310563	YDR196C	CAB5	Other
chr04:845169-845209;-	111.999	1.04764	0.331022	9.9895	0.00157435	0.00513404	YDR200C	VPS64	Other
chr04:846598-846646;-	105.729	1.02543	0.341254	8.99698	0.00270427	0.00814618	YDR200C	VPS64	Other
chr04:847389-847412;+	88.217	0.365351	0.357559	1.01733	0.313154	0.417671	YDR201W	SPC19	Other
chr04:847482-847512;+	67.4135	-0.0604445	0.445807	0.0184877	0.891846	0.924981	YDR201W	SPC19	Other
chr04:847733-847768;-	80.2122	-1.4062	0.509332	8.77458	0.00305458	0.00901877	YDR202C	RAV2	Other
chr04:848235-848249;-	62.4795	-0.532877	0.544311	0.99433	0.318686	0.423565	YDR202C	RAV2	Other
chr04:849312-849336;+	128.984	-2.55847	0.501852	33.9931	5.53069e-09	8.96876e-08	YDR204W	COQ4	Ime4p-dependent
chr04:849356-849372;+	168.171	-1.932	0.372598	30.638	3.10941e-08	4.2344e-07	YDR204W	COQ4	Ime4p-dependent
chr04:849378-849400;+	200.332	-1.99218	0.346271	37.0502	1.15125e-09	2.23192e-08	YDR204W	COQ4	Ime4p-dependent
chr04:849440-849456;+	155.959	-1.28229	0.350334	14.3071	0.000155275	0.000702837	YDR204W	COQ4	Ime4p-dependent
chr04:849754-849791;+	232.354	-0.347188	0.270005	1.66134	0.197423	0.289296	YDR204W	COQ4	Other
chr04:849841-849858;+	168.527	-1.22981	0.335738	14.1629	0.000167648	0.000753823	YDR204W	COQ4	Ime4p-dependent
chr04:850407-850426;+	79.0732	0.459324	0.469861	0.946598	0.330587	0.436329	YDR205W	MSC2	Other
chr04:853381-853436;+	125.087	0.208305	0.375602	0.305968	0.580165	0.678034	YDR206W	EBS1	Other
chr04:853675-853707;+	116.16	-1.32849	0.777794	2.97954	0.084323	0.143539	YDR206W	EBS1	Other
chr04:853809-853825;+	122.249	0.513557	0.381252	1.80624	0.17896	0.267429	YDR206W	EBS1	Other
chr04:855641-855670;-	100.947	-1.64118	0.555231	10.3566	0.00129012	0.00434252	YDR207C	UME6	Other
chr04:855674-855737;-	188.883	-1.94331	0.394707	26.6408	2.45019e-07	2.54621e-06	YDR207C	UME6	Ime4p-dependent
chr04:855768-855813;-	130.082	-0.529643	0.366393	2.14101	0.143408	0.223603	YDR207C	UME6	Other
chr04:856021-856070;-	161.45	-0.716879	0.323842	5.05762	0.0245178	0.0517214	YDR207C	UME6	Other
chr04:856111-856181;-	174.144	-0.60929	0.305487	4.07251	0.0435866	0.0832484	YDR207C	UME6	Other
chr04:856452-856499;-	121.585	-0.439313	0.395522	1.2531	0.262962	0.363141	YDR207C	UME6	Other
chr04:856912-856947;-	157.289	-0.653863	0.362721	3.30107	0.0692346	0.121842	YDR207C	UME6	Other
chr04:856979-857020;-	133.33	0.615552	0.351108	3.09128	0.0787128	0.135811	YDR207C	UME6	Other
chr04:857105-857142;-	140.989	1.09961	0.347983	10.3071	0.00132521	0.00443867	YDR207C	UME6	Other
chr04:859577-859600;+	128.264	-2.51203	0.685949	20.5964	5.67026e-06	3.97461e-05	YDR208W	MSS4	Ime4p-dependent
chr04:859613-859643;+	174.096	-1.82316	0.433468	22.2551	2.38724e-06	1.8703e-05	YDR208W	MSS4	Ime4p-dependent
chr04:859646-859662;+	172.338	-0.76719	0.394812	3.92539	0.0475623	0.0895107	YDR208W	MSS4	Other
chr04:859757-859781;+	118.852	-0.671973	0.493697	1.97899	0.159497	0.243505	YDR208W	MSS4	Other
chr04:860081-860122;+	144.937	-1.17697	0.435354	8.3077	0.00394774	0.0111735	YDR208W	MSS4	Other
chr04:864582-864597;+	92.0664	0.0731769	0.427596	0.0291525	0.864427	0.905622	YDR211W	GCD6	Other
chr04:864617-864677;+	161.544	-1.99155	0.389149	35.7298	2.2667e-09	4.1177e-08	YDR211W	GCD6	Ime4p-dependent
chr04:864693-864737;+	117.146	0.0529778	0.33891	0.0243663	0.875956	0.91458	YDR211W	GCD6	Other
chr04:866165-866192;+	106.963	-2.83158	0.679269	28.7888	8.07152e-08	9.64026e-07	YDR212W	TCP1	Ime4p-dependent
chr04:867565-867602;+	107.722	-0.548187	0.414965	1.81998	0.177315	0.265471	YDR212W	TCP1	Other
chr04:867653-867687;+	93.4608	-0.704556	0.460239	2.50003	0.113844	0.184609	YDR212W	TCP1	Other
chr04:867696-867710;+	98.6715	-0.22994	0.416563	0.309479	0.578	0.676085	YDR212W	TCP1	Other
chr04:872171-872201;+	76.7294	0.361165	0.387977	0.866733	0.351861	0.458755	YDR214W	AHA1	Other
chr04:872830-872855;+	52.3735	-2.93222	0.771659	22.9267	1.68298e-06	1.38106e-05	YDR214W	AHA1	Ime4p-dependent
chr04:872856-872897;+	72.8253	-1.16196	0.432373	7.85506	0.00506785	0.0137713	YDR214W	AHA1	Other
chr04:875051-875137;+	630.841	-1.79623	0.431614	17.2632	3.25437e-05	0.000182225	YDR216W	ADR1	Ime4p-dependent
chr04:876656-876677;+	465.213	-2.19813	0.473202	24.5996	7.05653e-07	6.59186e-06	YDR216W	ADR1	Ime4p-dependent
chr04:876691-876727;+	767.172	-2.25938	0.439846	26.0416	3.34141e-07	3.36225e-06	YDR216W	ADR1	Ime4p-dependent
chr04:876728-876746;+	481.936	-1.76662	0.559037	10.1767	0.00142227	0.00471258	YDR216W	ADR1	Other
chr04:876755-876768;+	545.212	-2.47773	0.431454	35.6673	2.34065e-09	4.23587e-08	YDR216W	ADR1	Ime4p-dependent
chr04:876775-876790;+	503.096	-1.76679	0.397174	21.0576	4.45693e-06	3.22382e-05	YDR216W	ADR1	Ime4p-dependent
chr04:878186-878220;+	529.686	0.283965	0.349657	0.661126	0.416163	0.526159	YDR216W	ADR1	Other
chr04:878538-878649;-	172.23	-3.10371	0.616437	24.6425	6.90112e-07	6.4721e-06	YDR217C	RAD9	Ime4p-dependent
chr04:883157-883205;-	108.023	3.14951	1.2753	5.81605	0.0158805	0.0361211	YDR218C	SPR28	Other
chr04:884646-884720;-	283.924	-1.04482	0.243466	19.6745	9.18166e-06	6.0276e-05	YDR219C	MFB1	Ime4p-dependent
chr04:884734-884758;-	127.52	-0.230741	0.325018	0.511718	0.474396	0.58253	YDR219C	MFB1	Other
chr04:884913-884961;-	95.0047	-1.73785	0.52916	13.7693	0.000206682	0.000895089	YDR219C	MFB1	Ime4p-dependent
chr04:893522-893544;-	1822.1	0.989366	0.197927	25.0296	5.64566e-07	5.39568e-06	YDR224C	HTB1	Other
chr04:893647-893717;-	4120.34	0.682049	0.334519	4.16558	0.0412532	0.0795079	YDR224C	HTB1	Other
chr04:894463-894492;+	1777.26	0.936092	0.240122	15.2195	9.57098e-05	0.000462233	YDR225W	HTA1	Other
chr04:894558-894574;+	1040.04	0.876696	0.347954	6.34583	0.0117657	0.0282325	YDR225W	HTA1	Other
chr04:894870-894894;+	1400.56	1.28863	0.241373	28.4767	9.48349e-08	1.11442e-06	YDR225W	HTA1	Other
chr04:894897-894911;+	1236.36	1.30453	0.331752	15.4743	8.36349e-05	0.000412446	YDR225W	HTA1	Other
chr04:894933-894968;+	1481.49	1.03266	0.287716	12.8948	0.000329502	0.00134442	YDR225W	HTA1	Other
chr04:895643-895669;+	117.024	0.419027	0.3584	1.35504	0.244399	0.342173	YDR226W	ADK1	Other
chr04:895834-895857;+	118.581	0.135752	0.354713	0.145739	0.702641	0.780721	YDR226W	ADK1	Other
chr04:895870-895914;+	170.555	0.948121	0.276491	11.8423	0.000579005	0.00218886	YDR226W	ADK1	Other
chr04:896016-896029;+	152.954	0.743182	0.28972	6.57412	0.0103472	0.0253984	YDR226W	ADK1	Other
chr04:900080-900138;+	128.866	-2.31424	0.467484	30.0505	4.20939e-08	5.55745e-07	YDR227W	SIR4	Ime4p-dependent
chr04:900172-900198;+	97.5804	-4.60447	1.05524	47.4978	5.50649e-12	1.73564e-10	YDR227W	SIR4	Ime4p-dependent
chr04:900203-900219;+	114.525	-1.62392	0.451003	14.4557	0.000143494	0.000654802	YDR227W	SIR4	Ime4p-dependent
chr04:900226-900250;+	97.5899	-2.59847	0.613602	24.6029	7.04466e-07	6.58724e-06	YDR227W	SIR4	Ime4p-dependent
chr04:900616-900650;+	101.725	-3.32704	0.700458	36.8162	1.2981e-09	2.50134e-08	YDR227W	SIR4	Ime4p-dependent
chr04:900661-900676;+	84.2889	-2.37888	0.666565	16.89	3.96096e-05	0.000215454	YDR227W	SIR4	Ime4p-dependent
chr04:900677-900732;+	191.998	-2.79192	0.486969	36.4567	1.561e-09	2.95998e-08	YDR227W	SIR4	Ime4p-dependent
chr04:900759-900786;+	96.68	-2.92812	0.651821	29.8482	4.67228e-08	6.10088e-07	YDR227W	SIR4	Ime4p-dependent
chr04:904969-905022;+	66.9871	0.00541772	0.398066	0.00018556	0.989132	0.993201	YDR229W	IVY1	Other
chr04:905214-905239;-	93.8478	0.474069	0.359969	1.69694	0.192689	0.283406	YDR231C	COX20	Other
chr04:905328-905375;-	79.0322	0.262789	0.424145	0.377242	0.539083	0.641843	YDR231C	COX20	Other
chr04:907564-907586;+	115.326	-0.866478	0.516374	2.91639	0.0876839	0.148231	YDR232W	HEM1	Other
chr04:907852-907912;+	212.797	-0.23796	0.343534	0.480136	0.488361	0.595391	YDR232W	HEM1	Other
chr04:907925-907958;+	175.997	0.318384	0.391318	0.661739	0.415947	0.525956	YDR232W	HEM1	Other
chr04:907967-908003;+	171.65	-0.249681	0.372515	0.449681	0.502487	0.608236	YDR232W	HEM1	Other
chr04:908071-908101;+	129.274	-1.37855	0.524182	7.26797	0.00701952	0.0182366	YDR232W	HEM1	Other
chr04:908539-908599;-	158.152	0.423695	0.302222	1.94967	0.162622	0.247047	YDR233C	RTN1	Other
chr04:909159-909197;-	128.465	0.767186	0.36584	4.38258	0.0363081	0.0715414	YDR233C	RTN1	Other
chr04:913028-913084;+	100.941	-0.821885	0.395239	4.73127	0.029619	0.0602958	YDR235W	YDR235W	Other
chr04:916719-916773;-	276.273	-0.0178675	0.307487	0.00337797	0.953653	0.970579	YDR238C	SEC26	Other
chr04:917190-917206;-	220.431	-1.07872	0.543573	4.30865	0.037919	0.0740716	YDR238C	SEC26	Other
chr04:917272-917291;-	293.367	0.360386	0.287882	1.56276	0.211262	0.304698	YDR238C	SEC26	Other
chr04:917597-917613;-	255.435	0.278387	0.350912	0.627183	0.42839	0.537054	YDR238C	SEC26	Other
chr04:917714-917729;-	257.273	0.84258	0.350866	5.86227	0.0154688	0.0354216	YDR238C	SEC26	Other
chr04:917733-917751;-	229.859	-1.23288	0.491836	7.01425	0.00808633	0.0205318	YDR238C	SEC26	Other
chr04:917752-917824;-	385.204	-0.767255	0.238629	10.6336	0.00111054	0.00382184	YDR238C	SEC26	Other
chr04:917878-917906;-	279.879	0.617711	0.300276	4.2651	0.038903	0.0756986	YDR238C	SEC26	Other
chr04:918046-918120;-	316.977	0.625927	0.265809	5.56579	0.0183147	0.0406935	YDR238C	SEC26	Other
chr04:918393-918491;-	391.058	0.535933	0.218688	6.01988	0.0141456	0.0329267	YDR238C	SEC26	Other
chr04:918541-918574;-	268.136	-0.831426	0.337707	6.39044	0.0114736	0.027657	YDR238C	SEC26	Other
chr04:918655-918692;-	288.065	-1.18087	0.329395	14.0056	0.000182267	0.00080735	YDR238C	SEC26	Ime4p-dependent
chr04:918735-918762;-	266.026	-0.319904	0.327935	0.963774	0.326238	0.431553	YDR238C	SEC26	Other
chr04:919137-919165;-	244.318	0.493203	0.379348	1.69239	0.193286	0.284109	YDR238C	SEC26	Other
chr04:929458-929502;+	108.373	0.313669	0.38023	0.673526	0.411825	0.521506	YDR244W	PEX5	Other
chr04:929880-929936;+	135.967	-0.426266	0.328049	1.73931	0.187227	0.277042	YDR244W	PEX5	Other
chr04:929941-929992;+	138.807	-0.527122	0.333903	2.58714	0.107735	0.176298	YDR244W	PEX5	Other
chr04:930004-930041;+	102.388	0.205493	0.403856	0.256834	0.612303	0.705973	YDR244W	PEX5	Other
chr04:931012-931031;+	116.455	0.18556	0.351593	0.277074	0.598625	0.694239	YDR244W	PEX5	Other
chr04:931979-932004;+	88.8145	0.796045	0.413317	3.55978	0.0591956	0.107065	YDR245W	MNN10	Other
chr04:933069-933105;+	109.733	0.60873	0.324971	3.43434	0.0638541	0.114082	YDR246W	TRS23	Other
chr04:933221-933260;+	100.062	0.216914	0.349737	0.379985	0.537611	0.640634	YDR246W	TRS23	Other
chr04:933452-933479;+	80.8882	0.513249	0.397065	1.63628	0.200837	0.293215	YDR246W	TRS23	Other
chr04:933530-933581;+	103.755	-0.175471	0.346601	0.259764	0.610282	0.703899	YDR246W	TRS23	Other
chr04:934932-934961;+	140.137	-0.805502	0.719542	1.25281	0.263017	0.363165	YDR247W	VHS1	Other
chr04:936010-936029;+	104.322	-0.951339	0.516068	3.74637	0.0529222	0.0975535	YDR247W	VHS1	Other
chr04:936051-936073;+	136.209	-0.763011	0.412373	3.63212	0.0566745	0.10331	YDR247W	VHS1	Other
chr04:936076-936095;+	110.19	-1.13069	0.517346	5.3652	0.0205425	0.0447981	YDR247W	VHS1	Other
chr04:941208-941242;+	147.791	-0.600176	0.361975	2.79172	0.0947526	0.158265	YDR251W	PAM1	Other
chr04:941446-941481;+	155.47	-0.113119	0.363075	0.096678	0.755853	0.823944	YDR251W	PAM1	Other
chr04:941634-941656;+	219.8	-1.047	0.271181	15.4879	8.30368e-05	0.000409973	YDR251W	PAM1	Ime4p-dependent
chr04:941669-941684;+	125.753	-3.47226	0.763189	36.4329	1.58015e-09	2.98982e-08	YDR251W	PAM1	Ime4p-dependent
chr04:944478-944547;+	73.5847	-2.0225	0.760605	10.2139	0.00139384	0.00463444	YDR254W	CHL4	Other
chr04:944745-944781;-	288.997	0.361067	0.261353	1.91195	0.166746	0.252306	YDR255C	YDR255C	Other
chr04:944976-945017;-	416.112	1.17157	0.20542	33.9853	5.55302e-09	8.98966e-08	YDR255C	YDR255C	Other
chr04:945030-945047;-	249.722	-0.166846	0.312815	0.285669	0.593009	0.688985	YDR255C	YDR255C	Other
chr04:945401-945447;-	347.528	0.506835	0.224075	5.14421	0.023324	0.0497582	YDR255C	YDR255C	Other
chr04:945717-945736;-	223.766	0.491569	0.376161	1.7185	0.189886	0.279976	YDR255C	YDR255C	Other
chr04:945936-945957;-	270.449	0.486556	0.282603	2.98152	0.0842199	0.143415	YDR255C	YDR255C	Other
chr04:946038-946053;-	230.059	0.171846	0.351129	0.23949	0.624575	0.716046	YDR255C	YDR255C	Other
chr04:946236-946270;-	328.596	0.454104	0.229544	3.9306	0.0474149	0.0893748	YDR255C	YDR255C	Other
chr04:946850-946895;-	1569.32	-1.94666	0.187382	108.702	1.8857e-25	5.12857e-23	YDR256C	CTA1	Ime4p-dependent
chr04:946897-946912;-	690.97	-2.67804	0.323808	80.3505	3.13557e-19	3.27995e-17	YDR256C	CTA1	Ime4p-dependent
chr04:949195-949234;-	88.555	-3.5277	0.875976	30.2703	3.75833e-08	5.03881e-07	YDR257C	RKM4	Ime4p-dependent
chr04:953296-953346;-	158.224	0.908386	0.298947	9.07331	0.00259368	0.00786781	YDR259C	YAP6	Other
chr04:953983-954009;-	106.529	-0.728605	0.436998	2.97184	0.0847256	0.144044	YDR259C	YAP6	Other
chr04:954012-954057;-	128.435	-0.88152	0.40018	5.23343	0.0221568	0.0477497	YDR259C	YAP6	Other
chr04:968826-968868;+	172.384	0.920644	0.32247	8.3847	0.00378392	0.0108101	YDR262W	YDR262W	Other
chr04:969020-969047;+	128.993	0.0808744	0.36493	0.0492068	0.824449	0.875397	YDR262W	YDR262W	Other
chr04:970907-970924;-	106.576	-3.0374	0.630773	37.2236	1.05329e-09	2.09316e-08	YDR264C	AKR1	Ime4p-dependent
chr04:970959-970983;-	126.446	-0.689347	0.353513	3.92666	0.0475262	0.0894959	YDR264C	AKR1	Other
chr04:970987-971000;-	83.3677	-1.63119	0.62819	7.95034	0.00480782	0.0131586	YDR264C	AKR1	Other
chr04:971178-971211;-	88.9615	-2.88027	0.771411	21.8178	2.99808e-06	2.27945e-05	YDR264C	AKR1	Ime4p-dependent
chr04:982084-982125;+	136.463	-1.11277	0.427842	7.64598	0.00568989	0.0151672	YDR270W	CCC2	Other
[truncated: 7,520 more rows]

## Sheet: Pho92 iCLIP
peak_id	baseMean	log2FoldChange	lfcSE	stat	pvalue	padj	gene_id	gene_name	category	sup_category
chr01:19245-19292;+	1015.1	-3.74635	0.458829	63.5079	1.59723e-15	1.79572e-14	YAL062W	GDH3	IME4-dependent	Binding Down
chr01:19311-19388;+	1372.57	-3.54352	0.366978	89.2032	3.56278e-21	6.18825e-20	YAL062W	GDH3	IME4-dependent	Binding Down
chr01:21195-21239;+	357.467	-1.33353	0.262202	26.2356	3.02205e-07	1.2535e-06	YAL061W	BDH2	IME4-independent	No change
chr01:21551-21631;+	251.218	-0.214345	0.625064	0.118104	0.7311	0.777526	YAL060W	BDH1	IME4-independent	No change
chr01:22713-22738;+	257.865	-0.138014	0.393734	0.122578	0.726255	0.773761	YAL060W	BDH1	IME4-independent	No change
chr01:22765-22804;+	290.723	-0.425478	0.363174	1.37777	0.240481	0.299434	YAL060W	BDH1	IME4-independent	No change
chr01:28240-28395;+	251.759	0.260646	0.26333	0.98478	0.321022	0.385321	YAL056W	GPB2	IME4-independent	No change
chr01:29212-29278;-	9447.37	-0.821527	0.426637	3.69511	0.0545721	0.0797813	YAL054C	ACS1	IME4-independent	No change
chr01:29367-29400;-	5931.36	-1.72604	0.320052	28.7292	8.32407e-08	3.75195e-07	YAL054C	ACS1	IME4-independent	No change
chr01:29871-29897;-	5288.46	-0.498136	0.272568	3.33661	0.0677541	0.0968865	YAL054C	ACS1	IME4-independent	No change
chr01:31291-31325;-	8376.67	-2.78919	0.438453	39.0802	4.06754e-10	2.54917e-09	YAL054C	ACS1	IME4-dependent	Binding Down
chr01:32202-32236;+	385.614	0.595455	0.39807	2.28167	0.13091	0.173914	YAL053W	FLC2	IME4-independent	No change
chr01:32273-32320;+	393.054	0.600068	0.376609	2.59073	0.107491	0.146187	YAL053W	FLC2	IME4-independent	No change
chr01:32325-32398;+	447.873	0.513563	0.298085	3.00968	0.0827684	0.115696	YAL053W	FLC2	IME4-independent	No change
chr01:32681-32759;+	506.596	0.575541	0.260815	4.9407	0.0262314	0.0412366	YAL053W	FLC2	IME4-independent	No change
chr01:32834-32956;+	467.335	0.790389	0.29905	7.15736	0.00746571	0.0132891	YAL053W	FLC2	IME4-independent	No change
chr01:33337-33424;+	408.319	1.42131	0.387889	14.8425	0.000116873	0.000308413	YAL053W	FLC2	IME4-independent	No change
chr01:34367-34411;+	382.61	0.786136	0.41403	3.72681	0.0535455	0.0784611	YAL053W	FLC2	IME4-independent	No change
chr01:34582-34639;+	407.69	0.317889	0.357767	0.794832	0.372643	0.438406	YAL053W	FLC2	IME4-independent	No change
chr01:38071-38179;+	225.913	-0.375264	0.286576	1.74272	0.186794	0.239154	YAL051W	OAF1	IME4-independent	No change
chr01:59489-59515;+	598.046	-0.081219	1.25082	0.00422429	0.948178	0.958271	YAL038W	CDC19	IME4-independent	No change
chr01:59596-59681;+	779.938	-0.851031	1.01763	0.697761	0.403537	0.469351	YAL038W	CDC19	IME4-independent	No change
chr01:66994-67064;-	235.765	0.416061	0.315862	1.75694	0.185007	0.23707	YAL034C	FUN19	IME4-independent	No change
chr01:67390-67475;-	352.076	0.571528	0.279955	4.22818	0.0397581	0.0599065	YAL034C	FUN19	IME4-independent	No change
chr01:67516-67562;-	221.61	0.633702	0.335494	3.67117	0.0553613	0.0807889	YAL034C	FUN19	IME4-independent	No change
chr01:67738-67774;-	224.993	-1.27704	0.33655	14.9017	0.000113261	0.000299415	YAL034C	FUN19	IME4-independent	No change
chr01:67789-67839;-	225.64	-3.01709	0.413311	73.0512	1.2633e-17	1.68434e-16	YAL034C	FUN19	IME4-dependent	Binding Down
chr01:74118-74182;+	214.636	2.45382	0.331232	57.5129	3.35776e-14	3.30681e-13	YAL030W	SNC1	IME4-independent	Binding Up
chr01:92656-92704;-	399.236	-3.93936	0.362518	200.216	1.87335e-45	1.13331e-43	YAL023C	PMT2	IME4-dependent	Binding Down
chr01:92710-92735;-	264.315	-1.19592	0.310174	15.5384	8.0847e-05	0.000220611	YAL023C	PMT2	IME4-independent	No change
chr01:92820-92862;-	447.36	-4.48247	0.384634	273.091	2.406e-61	2.64155e-59	YAL023C	PMT2	IME4-dependent	Binding Down
chr01:106280-106331;+	228.454	0.956944	0.396444	6.17975	0.0129221	0.0218661	YAL017W	PSK1	IME4-independent	No change
chr01:106404-106508;+	245.098	1.72903	0.412615	20.6529	5.50528e-06	1.84888e-05	YAL017W	PSK1	IME4-independent	No change
chr01:106736-106780;+	218.304	-0.820605	0.373363	4.928	0.0264249	0.0415042	YAL017W	PSK1	IME4-independent	No change
chr01:110585-110619;+	204.132	-2.53267	0.514908	31.8811	1.63902e-08	8.15202e-08	YAL017W	PSK1	IME4-dependent	Binding Down
chr01:110650-110708;+	236.902	-2.70759	0.435546	52.0963	5.28455e-13	4.65302e-12	YAL017W	PSK1	IME4-dependent	Binding Down
chr01:113035-113081;+	213.347	-0.745653	0.464661	2.69702	0.100536	0.137697	YAL016W	TPD3	IME4-independent	No change
chr01:113134-113195;+	252.144	-1.47128	0.389057	16.3995	5.1298e-05	0.000145377	YAL016W	TPD3	IME4-independent	No change
chr01:125742-125830;-	14677.1	-3.07498	0.17606	293.417	8.95405e-66	1.20649e-63	YAL005C	SSA1	IME4-dependent	Binding Down
chr01:129639-129679;+	558.225	-1.112	0.285134	15.4715	8.37605e-05	0.000227723	YAL003W	EFB1	IME4-independent	No change
chr01:143080-143119;-	350.62	-0.645544	0.372549	3.15104	0.0758786	0.107178	YAR007C	RFA1	IME4-independent	No change
chr01:143165-143218;-	380.294	0.356777	0.307351	1.33698	0.247567	0.307102	YAR007C	RFA1	IME4-independent	No change
chr01:143246-143299;-	371.274	-0.902958	0.357236	6.84677	0.00888015	0.0155704	YAR007C	RFA1	IME4-independent	No change
chr01:143976-144023;-	311.408	0.793422	0.480556	2.72062	0.0990595	0.135863	YAR007C	RFA1	IME4-independent	No change
chr01:176144-176190;+	442.737	0.872627	0.691653	1.59206	0.207032	0.262158	YAR035W	YAT1	IME4-independent	No change
chr01:176387-176455;+	562.17	0.974899	0.70791	1.89371	0.168785	0.218582	YAR035W	YAT1	IME4-independent	No change
chr01:176503-176585;+	569.844	0.586728	0.687922	0.728087	0.393504	0.459122	YAR035W	YAT1	IME4-independent	No change
chr01:176724-176803;+	532.445	0.598169	0.706112	0.718393	0.396672	0.462333	YAR035W	YAT1	IME4-independent	No change
chr01:177377-177428;+	464.088	-0.774037	0.447982	2.99883	0.0833246	0.116346	YAR035W	YAT1	IME4-independent	No change
chr01:177674-177712;+	434.778	0.274823	0.474841	0.336475	0.561871	0.623732	YAR035W	YAT1	IME4-independent	No change
chr01:178162-178196;+	513.44	0.512028	0.418131	1.50253	0.220283	0.277083	YAR035W	YAT1	IME4-independent	No change
chr01:178216-178322;+	948.506	0.264435	0.538153	0.241686	0.622991	0.680893	YAR035W	YAT1	IME4-independent	No change
chr01:182180-182229;+	220.642	-1.91304	0.361852	32.5312	1.17296e-08	5.96404e-08	YAR042W	SWH1	IME4-independent	No change
chr02:23999-24060;+	210.938	1.34887	0.361937	14.1942	0.000164876	0.000419046	YBL102W	SFT2	IME4-independent	No change
chr02:24366-24488;-	471.393	0.915776	0.30574	8.9364	0.00279544	0.00548177	YBL101C	ECM21	IME4-independent	No change
chr02:24669-24774;-	241.72	0.872114	0.311102	7.80084	0.00522218	0.00964705	YBL101C	ECM21	IME4-independent	No change
chr02:30268-30329;+	1911.47	2.23403	0.241313	85.1688	2.73955e-20	4.45116e-19	YBL099W	ATP1	IME4-independent	Binding Up
chr02:31960-31986;+	1275.86	0.748649	0.371598	4.06307	0.0438308	0.0654774	YBL099W	ATP1	IME4-independent	No change
chr02:32012-32085;+	1548.01	1.2256	0.228688	28.6087	8.85838e-08	3.96266e-07	YBL099W	ATP1	IME4-independent	No change
chr02:54414-54469;-	1044.24	-6.03486	0.342967	516.596	2.3286e-114	1.47916e-111	YBL086C	YBL086C	IME4-dependent	Binding Down
chr02:59724-59841;+	247.835	0.12315	0.33322	0.135077	0.713225	0.762987	YBL085W	BOI1	IME4-independent	No change
chr02:59949-60021;+	364.502	-0.344987	0.272753	1.63453	0.201077	0.255528	YBL085W	BOI1	IME4-independent	No change
chr02:60024-60067;+	247.094	0.750708	0.319988	5.319	0.0210941	0.0339591	YBL085W	BOI1	IME4-independent	No change
chr02:61514-61540;-	345.565	-3.08833	0.387575	95.7046	1.33369e-22	2.5343e-21	YBL084C	CDC27	IME4-dependent	Binding Down
chr02:61580-61636;-	573.594	-1.92692	0.249133	65.1562	6.91903e-16	8.09618e-15	YBL084C	CDC27	IME4-independent	No change
chr02:61859-61919;-	342.507	1.04871	0.271113	15.1075	0.000101558	0.000270729	YBL084C	CDC27	IME4-independent	No change
chr02:72767-72800;+	681.022	-7.45631	0.743117	403.086	1.17247e-89	3.47559e-87	YBL079W	NUP170	IME4-dependent	Binding Down
chr02:73114-73180;-	1769.07	1.86455	0.362414	26.1342	3.18489e-07	1.31552e-06	YBL078C	ATG8	IME4-independent	No change
chr02:73244-73383;-	2764.62	1.53589	0.175222	76.4092	2.30578e-18	3.22919e-17	YBL078C	ATG8	IME4-independent	No change
chr02:77571-77638;-	707.061	0.957465	0.819389	1.36621	0.242465	0.30153	YBL075C	SSA3	IME4-independent	No change
chr02:77746-77770;-	615.712	1.06631	0.825834	1.68129	0.194754	0.248307	YBL075C	SSA3	IME4-independent	No change
chr02:78185-78225;-	617.154	1.01732	0.47315	4.94118	0.0262241	0.0412324	YBL075C	SSA3	IME4-independent	No change
chr02:81316-81367;+	471.414	0.734605	0.4067	3.26554	0.0707496	0.100668	snR56	snR56	IME4-independent	No change
chr02:86648-86775;-	209.31	0.128412	0.284698	0.203534	0.651883	0.707493	YBL067C	UBP13	IME4-independent	No change
chr02:89596-89631;-	313.257	0.0919738	0.301157	0.0931725	0.760182	0.802124	YBL066C	SEF1	IME4-independent	No change
chr02:90308-90348;-	916.756	1.76972	0.505931	12.0854	0.000508184	0.00116868	YBL066C	SEF1	IME4-independent	No change
chr02:93453-93492;-	869.787	-1.40714	0.275685	27.482	1.58564e-07	6.83194e-07	YBL064C	PRX1	IME4-independent	No change
chr02:94006-94056;-	1025.38	1.11792	0.283662	15.5844	7.8902e-05	0.000215701	YBL064C	PRX1	IME4-independent	No change
chr02:96356-96403;+	339.975	-4.76486	0.746253	105.675	8.6866e-25	1.89803e-23	YBL063W	KIP1	IME4-dependent	Binding Down
chr02:97868-97940;+	290.344	-1.89662	0.388028	29.2181	6.4672e-08	2.95848e-07	YBL063W	KIP1	IME4-independent	No change
chr02:98332-98359;+	204.03	0.307316	0.41961	0.5295	0.466817	0.532368	YBL063W	KIP1	IME4-independent	No change
chr02:105836-105935;+	420.471	-0.62982	0.214751	8.84587	0.00293753	0.00573512	YBL058W	SHP1	IME4-independent	No change
chr02:106949-107040;+	231.025	2.718	0.564019	25.2251	5.10152e-07	2.03443e-06	YBL056W	PTC3	IME4-independent	Binding Up
chr02:107436-107502;+	226.585	2.06182	0.56056	13.3753	0.000254955	0.000623916	YBL056W	PTC3	IME4-independent	Binding Up
chr02:108148-108273;+	244.511	2.09742	0.447756	21.8294	2.98003e-06	1.0479e-05	YBL056W	PTC3	IME4-independent	Binding Up
chr02:108345-108463;+	277.656	2.33199	0.363075	42.2561	8.00704e-11	5.51989e-10	YBL056W	PTC3	IME4-independent	Binding Up
chr02:108464-108684;+	337.91	1.78395	0.27868	40.0013	2.53797e-10	1.63552e-09	YBL056W	PTC3	IME4-independent	No change
chr02:115440-115537;-	747.733	-2.1537	0.282124	58.4234	2.11358e-14	2.10673e-13	YBL051C	PIN4	IME4-dependent	Binding Down
chr02:115625-115670;-	228.797	-0.439856	0.347555	1.59537	0.20656	0.261598	YBL051C	PIN4	IME4-independent	No change
chr02:118920-119030;+	216.686	-0.00401402	0.315147	0.00016222	0.989838	0.991622	YBL050W	SEC17	IME4-independent	No change
chr02:119852-119891;+	358.628	1.08243	0.340222	10.3378	0.00130334	0.00275181	YBL049W	MOH1	IME4-independent	No change
chr02:119955-119991;+	361.263	1.44659	0.345379	18.3914	1.79866e-05	5.54436e-05	YBL049W	MOH1	IME4-independent	No change
chr02:120106-120139;+	357.978	1.46293	0.346523	18.7402	1.49793e-05	4.68888e-05	YBL049W	MOH1	IME4-independent	No change
chr02:120928-120991;-	510.229	-0.103539	0.195884	0.278895	0.597427	0.658456	YBL047C	EDE1	IME4-independent	No change
chr02:122458-122504;-	544.56	-6.19837	0.528482	435.036	1.30253e-96	5.03625e-94	YBL047C	EDE1	IME4-dependent	Binding Down
chr02:127143-127181;-	1143.08	-0.75187	0.195612	15.2636	9.35032e-05	0.000251639	YBL045C	COR1	IME4-independent	No change
chr02:130668-130725;+	389.052	1.77136	0.191574	84.6255	3.60578e-20	5.75695e-19	YBL043W	ECM13	IME4-independent	No change
chr02:134346-134469;+	255.995	2.13653	0.33464	42.3681	7.56123e-11	5.22517e-10	YBL041W	PRE7	IME4-independent	Binding Up
chr02:134680-134807;+	257.08	1.37694	0.322975	17.9329	2.28837e-05	6.9008e-05	YBL041W	PRE7	IME4-independent	No change
chr02:134910-134960;+	203.099	2.14451	0.447844	23.9147	1.00701e-06	3.8527e-06	YBL041W	PRE7	IME4-independent	Binding Up
chr02:135233-135344;-	304.536	-1.57279	0.371793	18.3575	1.83092e-05	5.63015e-05	YBL040C	ERD2	IME4-independent	No change
chr02:146904-146936;-	240.789	0.392484	0.46514	0.710442	0.399297	0.46521	YBL034C	STU1	IME4-independent	No change
chr02:150041-150130;-	274.737	0.119247	0.38072	0.0978351	0.754443	0.797957	YBL034C	STU1	IME4-independent	No change
chr02:150189-150258;-	320.264	-1.63947	0.388513	19.586	9.61699e-06	3.10657e-05	YBL034C	STU1	IME4-independent	No change
chr02:151199-151321;-	300.172	0.0376195	0.347841	0.0116691	0.913977	0.930722	YBL034C	STU1	IME4-independent	No change
chr02:151775-151822;-	666.503	-2.48002	0.337087	55.7964	8.03795e-14	7.66147e-13	YBL033C	RIB1	IME4-dependent	Binding Down
chr02:154423-154449;+	331.953	-0.71816	0.228898	10.0731	0.00150453	0.00312903	YBL032W	HEK2	IME4-independent	No change
chr02:154459-154498;+	486.827	-2.53361	0.467336	29.2685	6.30121e-08	2.88551e-07	YBL032W	HEK2	IME4-dependent	Binding Down
chr02:156974-157034;-	2169.19	2.45647	0.318477	58.1178	2.46881e-14	2.45583e-13	YBL030C	PET9	IME4-independent	Binding Up
chr02:157498-157642;-	228.067	1.61407	0.275213	34.6685	3.90901e-09	2.1565e-08	YBL029C-A	YBL029C-A	IME4-independent	No change
chr02:162594-162659;-	208.585	-2.85814	0.350871	77.2985	1.46975e-18	2.08461e-17	Unit790	Unit790	IME4-dependent	Binding Down
chr02:171240-171376;-	210.447	0.833974	0.305321	7.62317	0.00576233	0.0105637	YBL022C	PIM1	IME4-independent	No change
chr02:188729-188799;+	3048.01	0.865833	0.479935	3.24851	0.0714882	0.101654	YBL015W	ACH1	IME4-independent	No change
chr02:188879-188965;+	4514.05	1.07271	0.255161	17.6034	2.72109e-05	8.09048e-05	YBL015W	ACH1	IME4-independent	No change
chr02:188981-189018;+	2921.88	1.24548	0.357891	12.0641	0.000514011	0.00118147	YBL015W	ACH1	IME4-independent	No change
chr02:192703-192786;-	233.115	-0.42927	0.310314	1.98599	0.158761	0.20723	YBL014C	RRN6	IME4-independent	No change
chr02:199654-199697;+	270.015	1.22837	0.291696	17.7348	2.53942e-05	7.59349e-05	YBL011W	SCT1	IME4-independent	No change
chr02:203810-203841;+	242.65	-5.26573	0.544634	207.92	3.90625e-47	2.49915e-45	YBL008W	HIR1	IME4-dependent	Binding Down
chr02:206334-206380;-	405.284	-3.02603	0.278933	139.442	3.5262e-32	1.128e-30	YBL007C	SLA1	IME4-dependent	Binding Down
chr02:206430-206493;-	446.581	-2.77315	0.257873	130.69	2.89409e-30	8.52223e-29	YBL007C	SLA1	IME4-dependent	Binding Down
chr02:206511-206537;-	266.708	-2.78677	0.333039	85.0227	2.94964e-20	4.75203e-19	YBL007C	SLA1	IME4-dependent	Binding Down
chr02:218757-218779;+	298.37	1.37054	0.656359	4.32267	0.0376078	0.0570144	YBL004W	UTP20	IME4-independent	No change
chr02:223741-223853;-	1230.21	-1.44991	0.620737	5.3979	0.020161	0.0325629	YBL003C	HTA2	IME4-independent	No change
chr02:225421-225521;+	1314.93	0.752171	0.610772	1.51146	0.218917	0.275677	YBL002W	HTB2	IME4-independent	No change
chr02:225532-225560;+	669.859	0.0313089	0.376738	0.00686808	0.933952	0.946835	YBL002W	HTB2	IME4-independent	No change
chr02:227494-227518;-	233.169	2.43907	0.370338	47.5455	5.37421e-12	4.28534e-11	YBR001C	NTH2	IME4-independent	Binding Up
chr02:229793-229830;-	211.116	-0.616144	0.416827	2.30935	0.128598	0.171252	YBR001C	NTH2	IME4-independent	No change
chr02:229832-229866;-	208.417	0.16747	0.377803	0.194456	0.659233	0.713957	YBR001C	NTH2	IME4-independent	No change
chr02:236992-237089;+	561.548	-3.59682	0.271478	203.393	3.79613e-46	2.32821e-44	YBR006W	UGA2	IME4-dependent	Binding Down
chr02:243768-243846;-	1413.1	0.402414	0.587149	0.469313	0.493303	0.558278	YBR009C	HHF1	IME4-independent	No change
chr02:243956-244001;-	951.135	0.291025	0.33345	0.760091	0.3833	0.449103	YBR009C	HHF1	IME4-independent	No change
chr02:245110-245158;+	998.62	0.926131	0.38766	5.69575	0.017006	0.0278979	YBR010W	HHT1	IME4-independent	No change
chr02:245284-245376;+	1465.64	0.826627	0.506972	2.6484	0.103654	0.141554	YBR010W	HHT1	IME4-independent	No change
chr02:245580-245618;-	327.505	0.0620929	0.330381	0.0352676	0.851036	0.877378	YBR011C	IPP1	IME4-independent	No change
chr02:245624-245754;-	527.79	-0.248566	0.225177	1.2218	0.269007	0.329925	YBR011C	IPP1	IME4-independent	No change
chr02:246193-246245;-	306.946	0.671143	0.368294	3.36525	0.0665853	0.0953839	YBR011C	IPP1	IME4-independent	No change
chr02:250167-250258;-	259.507	-1.4111	0.291958	23.7353	1.10539e-06	4.19378e-06	YBR015C	MNN2	IME4-independent	No change
chr02:253247-253320;+	467.826	-0.199626	0.290215	0.473779	0.491254	0.556383	YBR016W	YBR016W	IME4-independent	No change
chr02:253324-253362;+	383.574	-2.25296	0.26701	86.4386	1.4414e-20	2.40045e-19	YBR016W	YBR016W	IME4-dependent	Binding Down
chr02:266894-267006;-	424.508	-1.0517	0.215998	24.4273	7.71674e-07	2.9928e-06	YBR023C	CHS3	IME4-independent	No change
chr02:269045-269085;-	318.182	0.372797	0.307284	1.49654	0.221205	0.278086	YBR023C	CHS3	IME4-independent	No change
chr02:275329-275388;-	800.626	-2.39944	0.202537	165.983	5.57964e-38	2.44432e-36	YBR026C	ETR1	IME4-dependent	Binding Down
chr02:275490-275593;-	894.455	-1.7775	0.180194	103.198	3.03263e-24	6.39081e-23	YBR026C	ETR1	IME4-independent	No change
chr02:287318-287446;-	219.791	1.38893	0.350795	15.6011	7.8209e-05	0.000214268	YBR034C	HMT1	IME4-independent	No change
chr02:288707-288768;-	204.284	1.76312	0.326122	31.9671	1.56807e-08	7.8166e-08	YBR035C	PDX3	IME4-independent	No change
chr02:288808-288868;-	242.009	1.6323	0.283347	35.5453	2.49191e-09	1.40881e-08	YBR035C	PDX3	IME4-independent	No change
chr02:291455-291500;-	283.588	-0.832277	0.268074	9.94695	0.00161116	0.00332514	YBR036C	CSG2	IME4-independent	No change
chr02:291502-291536;-	203.883	-0.834804	0.365937	5.39964	0.0201409	0.0325365	YBR036C	CSG2	IME4-independent	No change
chr02:292205-292273;-	211.487	0.497522	0.343142	2.12951	0.144487	0.190387	YBR036C	CSG2	IME4-independent	No change
chr02:299005-299040;+	443.111	0.647622	0.346445	3.46593	0.0626453	0.0904538	YBR039W	ATP3	IME4-independent	No change
chr02:299072-299127;+	512.752	-0.83607	0.288055	9.00682	0.00268973	0.00530138	YBR039W	ATP3	IME4-independent	No change
chr02:312915-312952;-	225.567	-1.26849	0.351236	13.1266	0.000291132	0.000705807	YBR046C	ZTA1	IME4-independent	No change
chr02:313273-313328;-	228.197	-0.928639	0.344106	7.25023	0.00708918	0.0127003	YBR046C	ZTA1	IME4-independent	No change
chr02:313558-313604;-	257.938	-0.887379	0.910676	0.946709	0.330558	0.395381	YBR046C	ZTA1	IME4-independent	No change
chr02:313850-313878;-	216.562	-3.0556	1.1353	7.04979	0.00792745	0.0140324	YBR046C	ZTA1	IME4-independent	No change
chr02:316749-316822;-	202.422	-2.82721	0.466162	58.0191	2.59586e-14	2.57645e-13	YBR049C	REB1	IME4-dependent	Binding Down
chr02:325387-325424;+	217.532	-1.49053	0.891377	2.86218	0.0906844	0.125577	YBR054W	YRO2	IME4-independent	No change
chr02:325497-325558;+	254.388	-1.05809	0.680419	2.43884	0.118363	0.15886	YBR054W	YRO2	IME4-independent	No change
chr02:325571-325639;+	244.432	-1.36056	0.481402	8.43392	0.00368286	0.00700721	YBR054W	YRO2	IME4-independent	No change
chr02:326701-326755;+	220.095	-0.40627	0.52644	0.601153	0.438138	0.503927	YBR054W	YRO2	IME4-independent	No change
chr02:334992-335057;-	228.93	1.42464	0.487579	8.3707	0.00381319	0.00724432	YBR057C	MUM2	IME4-independent	No change
chr02:336119-336160;-	228.033	3.7497	0.704426	43.0877	5.234e-11	3.70589e-10	YBR057C	MUM2	IME4-independent	Binding Up
chr02:339060-339101;-	201.088	2.88442	0.514593	38.6649	5.03186e-10	3.09891e-09	YBR058C-A	TSC3	IME4-independent	Binding Up
chr02:339106-339141;-	205.51	1.63953	0.427401	14.9955	0.000107766	0.000285651	YBR058C-A	TSC3	IME4-independent	No change
chr02:339619-339668;-	262.681	-2.57407	0.315093	74.8784	5.0061e-18	6.85967e-17	YBR059C	AKL1	IME4-dependent	Binding Down
chr02:354961-355000;-	713.104	1.54938	0.851197	3.28345	0.0699816	0.0997509	YBR067C	TIP1	IME4-independent	No change
chr02:355100-355194;-	1535.59	0.984176	0.636674	2.3787	0.123	0.164487	YBR067C	TIP1	IME4-independent	No change
chr02:355580-355637;-	792.755	-0.198872	0.489581	0.16483	0.684748	0.737223	YBR067C	TIP1	IME4-independent	No change
chr02:356641-356720;-	558.6	-0.0881702	0.435072	0.0410353	0.83947	0.867566	YBR068C	BAP2	IME4-independent	No change
chr02:357182-357207;-	562.499	0.932288	0.483433	4.03621	0.0445337	0.0664494	YBR068C	BAP2	IME4-independent	No change
chr02:357899-357965;-	539.539	-1.87303	0.543364	13.0571	0.000302144	0.000729559	YBR068C	BAP2	IME4-independent	No change
chr02:363930-363971;+	383.91	-5.1936	0.366112	298.335	7.5934e-67	1.03889e-64	YBR071W	YBR071W	IME4-dependent	Binding Down
chr02:364043-364087;+	414.381	-2.73128	0.296733	85.2157	2.67523e-20	4.3653e-19	YBR071W	YBR071W	IME4-dependent	Binding Down
chr02:368820-368926;+	268.126	-3.69767	0.334445	165.669	6.53319e-38	2.82037e-36	YBR073W	RDH54	IME4-dependent	Binding Down
chr02:377553-377593;+	822.533	-2.34816	0.385823	36.7866	1.31794e-09	7.72609e-09	YBR078W	ECM33	IME4-dependent	Binding Down
chr02:377656-377709;+	737.622	-1.75855	0.303423	33.8983	5.80681e-09	3.1137e-08	YBR078W	ECM33	IME4-independent	No change
chr02:393416-393487;+	309.123	-4.4798	0.356595	210.726	9.54038e-48	6.19289e-46	YBR083W	TEC1	IME4-dependent	Binding Down
chr02:401549-401577;-	1775.47	1.57682	0.508697	9.5011	0.00205349	0.00414944	YBR085C-A	YBR085C-A	IME4-independent	No change
chr02:401654-401707;-	1720.32	2.18244	0.379892	32.4808	1.20376e-08	6.1067e-08	YBR085C-A	YBR085C-A	IME4-independent	Binding Up
chr02:402973-403099;-	1117.8	-6.16772	0.28976	503.92	1.33393e-111	7.41414e-109	YBR086C	IST2	IME4-dependent	Binding Down
chr02:403228-403274;-	376.37	-5.09691	0.37109	233.401	1.08071e-52	8.50509e-51	YBR086C	IST2	IME4-dependent	Binding Down
chr02:404541-404566;-	343.609	2.8655	1.15213	6.45047	0.0110923	0.0190322	YBR086C	IST2	IME4-independent	No change
chr02:404633-404658;-	294.543	0.00175201	0.921461	3.61612e-06	0.998483	0.998932	YBR086C	IST2	IME4-independent	No change
chr02:405430-405477;-	284.132	-3.28149	1.11351	8.32136	0.00391816	0.00741525	YBR086C	IST2	IME4-independent	No change
chr02:407826-407861;-	396.272	-0.660474	0.256433	6.62369	0.0100631	0.0173804	YBR088C	POL30	IME4-independent	No change
chr02:407945-408055;-	747.711	-1.247	0.399853	9.66934	0.00187368	0.00381558	YBR088C	POL30	IME4-independent	No change
chr02:433638-433695;-	228.609	0.12976	0.370042	0.122792	0.726025	0.773609	YBR105C	VID24	IME4-independent	No change
chr02:435608-435644;+	604.377	1.9742	0.181327	121.241	3.3839e-28	8.85088e-27	YBR106W	PHO88	IME4-independent	No change
chr02:440550-440665;+	284.279	-1.88366	0.278099	47.6116	5.19591e-12	4.15907e-11	YBR108W	YBR108W	IME4-independent	No change
chr02:440623-440711;-	294.797	-0.629392	0.268611	5.70504	0.0169163	0.0277661	YBR109C	CMD1	IME4-independent	No change
chr02:440718-440823;-	357.151	0.43081	0.221606	3.76292	0.0524009	0.0769233	YBR109C	CMD1	IME4-independent	No change
chr02:445648-445737;-	213.066	1.48905	0.347023	18.6102	1.60363e-05	4.98466e-05	YBR112C	CYC8	IME4-independent	No change
chr02:461674-461732;+	441.417	0.282131	0.387555	0.532876	0.4654	0.531093	YBR118W	TEF2	IME4-independent	No change
chr02:461763-461882;+	632.585	1.17737	0.226841	27.3662	1.68347e-07	7.23591e-07	YBR118W	TEF2	IME4-independent	No change
chr02:464068-464117;-	227.159	-2.21365	0.404723	39.4918	3.29433e-10	2.08516e-09	YBR121C	GRS1	IME4-dependent	Binding Down
chr02:471557-471609;-	291.992	0.429557	0.298876	2.0635	0.150864	0.197735	YBR126C	TPS1	IME4-independent	No change
chr02:471625-471670;-	226.686	1.01122	0.400217	6.43741	0.0111742	0.0191616	YBR126C	TPS1	IME4-independent	No change
chr02:471990-472037;-	269.046	2.14764	0.366273	37.7056	8.22662e-10	4.96332e-09	YBR126C	TPS1	IME4-independent	Binding Up
chr02:473922-473948;-	297.763	0.29878	0.255359	1.36699	0.242329	0.301403	YBR127C	VMA2	IME4-independent	No change
chr02:474129-474174;-	202.214	0.42171	0.334413	1.59737	0.206277	0.261276	YBR127C	VMA2	IME4-independent	No change
chr02:482179-482242;-	449.211	1.44474	0.253582	32.6499	1.10345e-08	5.6364e-08	YBR132C	AGP2	IME4-independent	No change
chr02:482273-482338;-	323.228	1.54968	0.278816	31.31	2.19946e-08	1.07708e-07	YBR132C	AGP2	IME4-independent	No change
chr02:482367-482468;-	314.768	1.20214	0.296036	16.4631	4.9605e-05	0.000140848	YBR132C	AGP2	IME4-independent	No change
chr02:492360-492401;+	205.563	-2.91409	0.566922	34.7925	3.66793e-09	2.03486e-08	YBR136W	MEC1	IME4-dependent	Binding Down
chr02:495271-495296;+	449.258	1.38573	0.428894	10.4679	0.00121464	0.00258353	YBR136W	MEC1	IME4-independent	No change
chr02:495660-495711;+	274.616	-0.820689	0.35291	5.44828	0.0195876	0.0317175	YBR136W	MEC1	IME4-independent	No change
chr02:498868-498945;+	260.732	0.941605	0.375341	6.45551	0.0110609	0.018982	YBR139W	YBR139W	IME4-independent	No change
chr02:499368-499458;+	276.828	1.06384	0.351653	9.4643	0.00209509	0.00422486	YBR139W	YBR139W	IME4-independent	No change
chr02:499872-499912;+	220.895	0.563846	0.491857	1.32158	0.25031	0.310028	YBR139W	YBR139W	IME4-independent	No change
chr02:499956-500101;+	365.304	0.0552864	0.260568	0.0450391	0.831932	0.861578	YBR139W	YBR139W	IME4-independent	No change
chr02:500107-500143;+	228.805	-0.176283	0.449851	0.154127	0.694622	0.746408	YBR139W	YBR139W	IME4-independent	No change
chr02:500237-500361;-	313.873	0.320357	0.372576	0.741833	0.389074	0.454909	YBR140C	IRA1	IME4-independent	No change
chr02:500537-500598;-	271.468	1.08743	0.510759	4.75192	0.0292657	0.0454602	YBR140C	IRA1	IME4-independent	No change
chr02:505676-505725;-	291.564	-2.65095	0.559622	29.4598	5.70884e-08	2.64008e-07	YBR140C	IRA1	IME4-dependent	Binding Down
chr02:505923-505960;-	261.059	-0.919737	0.547801	2.94271	0.0862657	0.119963	YBR140C	IRA1	IME4-independent	No change
chr02:507151-507182;-	262.693	-2.68836	0.720163	19.4289	1.04415e-05	3.3522e-05	YBR140C	IRA1	IME4-dependent	Binding Down
chr02:508284-508353;-	268.752	0.666425	0.50603	1.76096	0.184504	0.236538	YBR140C	IRA1	IME4-independent	No change
chr02:513553-513708;-	328.094	2.4533	0.248518	104.761	1.37823e-24	2.9677e-23	YBR143C	SUP45	IME4-independent	Binding Up
chr02:523831-523955;+	1007.02	-2.35833	0.216357	119.702	7.35255e-28	1.9063e-26	YBR149W	ARA1	IME4-dependent	Binding Down
chr02:524022-524077;-	1479.07	-4.67879	0.211339	540.606	1.39179e-119	1.03143e-116	YBR150C	TBS1	IME4-dependent	Binding Down
chr02:528474-528510;+	228.796	-0.104051	0.327408	0.101613	0.749903	0.793726	YBR151W	APD1	IME4-independent	No change
chr02:528549-528606;+	390.599	-2.2802	0.323223	63.8575	1.33749e-15	1.51135e-14	YBR151W	APD1	IME4-dependent	Binding Down
chr02:545885-545933;-	245.218	-2.16171	0.413161	28.6646	8.60639e-08	3.86744e-07	YBR162C	TOS1	IME4-dependent	Binding Down
chr02:546235-546289;-	239.346	2.13541	0.417339	28.9559	7.40449e-08	3.3596e-07	YBR162C	TOS1	IME4-independent	Binding Up
chr02:552089-552130;+	298.33	-5.33369	0.661975	199.69	2.44082e-45	1.46664e-43	YBR165W	UBS1	IME4-dependent	Binding Down
chr02:556648-556732;-	311.542	0.939485	0.285923	10.7328	0.0010525	0.00225921	YBR169C	SSE2	IME4-independent	No change
chr02:556881-556918;-	222.201	2.2973	0.463447	28.2108	1.08797e-07	4.80402e-07	YBR169C	SSE2	IME4-independent	Binding Up
chr02:557037-557138;-	269.991	1.44562	0.32381	20.3213	6.54667e-06	2.17237e-05	YBR169C	SSE2	IME4-independent	No change
chr02:557965-558028;-	245.039	0.0883225	0.35689	0.0609907	0.804937	0.839585	YBR169C	SSE2	IME4-independent	No change
chr02:564408-564487;-	403.689	2.41857	0.236005	108.505	2.08279e-25	4.68918e-24	YBR173C	UMP1	IME4-independent	Binding Up
chr02:564624-564656;-	259.307	1.68351	0.355371	21.5105	3.51897e-06	1.22195e-05	YBR173C	UMP1	IME4-independent	No change
chr02:564912-564940;-	240.363	2.05218	0.405155	25.2812	4.95524e-07	1.98188e-06	YBR173C	UMP1	IME4-independent	Binding Up
chr02:584241-584277;+	260.719	-2.33401	1.06034	7.70802	0.0054976	0.0101222	YBR186W	PCH2	IME4-independent	No change
chr02:584471-584526;+	291.984	0.38487	0.425141	0.794046	0.372879	0.438626	YBR186W	PCH2	IME4-independent	No change
chr02:584743-584776;+	261.597	2.42271	0.581105	18.2259	1.96188e-05	6.00584e-05	YBR186W	PCH2	IME4-independent	Binding Up
chr02:584824-584899;+	306.113	-0.114003	0.408366	0.0789001	0.778794	0.818364	YBR186W	PCH2	IME4-independent	No change
chr02:585028-585154;+	320.773	1.12008	0.344334	10.0956	0.0014862	0.003096	YBR186W	PCH2	IME4-independent	No change
chr02:585193-585268;+	313.984	1.06024	0.350066	8.75873	0.00308124	0.00597243	YBR186W	PCH2	IME4-independent	No change
chr02:586070-586097;+	221.373	1.67662	0.332147	25.1859	5.20621e-07	2.07061e-06	YBR187W	GDT1	IME4-independent	No change
chr02:586328-586354;+	254.196	2.21812	0.316842	51.0278	9.1068e-13	7.80219e-12	YBR187W	GDT1	IME4-independent	Binding Up
chr02:586357-586388;+	249.546	-0.267204	0.328884	0.676256	0.410879	0.476892	YBR187W	GDT1	IME4-independent	No change
chr02:594952-595043;-	502.438	-3.16879	0.706926	19.4487	1.03339e-05	3.32005e-05	YBR196C	PGI1	IME4-dependent	Binding Down
chr02:595762-595837;-	317.349	-0.478872	1.27752	0.140585	0.7077	0.758353	YBR196C	PGI1	IME4-independent	No change
chr02:603164-603221;+	217.447	0.0282806	0.300434	0.00884984	0.925051	0.940384	YBR199W	KTR4	IME4-independent	No change
chr02:607123-607207;-	270.283	2.6606	0.363762	54.4725	1.57638e-13	1.46486e-12	YBR201C-A	YBR201C-A	IME4-independent	Binding Up
chr02:611063-611132;+	269.252	-2.86827	0.277103	130.98	2.50142e-30	7.39041e-29	YBR202W	MCM7	IME4-dependent	Binding Down
chr02:611145-611234;+	461.876	-1.91268	0.195273	99.4931	1.96853e-23	3.96964e-22	YBR202W	MCM7	IME4-independent	No change
chr02:614858-614930;+	248.151	-2.03273	0.300804	49.2803	2.21877e-12	1.83038e-11	YBR203W	COS111	IME4-dependent	Binding Down
chr02:617971-618004;+	243.595	1.39848	0.547318	6.40531	0.0113779	0.0194884	YBR207W	FTH1	IME4-independent	No change
chr02:618564-618603;+	250.862	-0.477524	0.572544	0.730063	0.392863	0.458434	YBR207W	FTH1	IME4-independent	No change
chr02:618697-618764;+	257.244	2.25952	0.505698	21.241	4.05003e-06	1.39008e-05	YBR207W	FTH1	IME4-independent	Binding Up
chr02:619232-619437;+	371.865	1.4774	0.304078	23.5456	1.21989e-06	4.59292e-06	YBR207W	FTH1	IME4-independent	No change
chr02:619390-619470;-	325.693	0.0782064	0.251328	0.0963451	0.756261	0.799239	YBR208C	DUR1%2C2	IME4-independent	No change
chr02:619487-619546;-	251.913	-1.71816	0.401312	23.0448	1.5827e-06	5.85235e-06	YBR208C	DUR1%2C2	IME4-independent	No change
chr02:623724-623751;-	262.397	2.40054	0.340504	57.4273	3.50701e-14	3.44617e-13	YBR208C	DUR1%2C2	IME4-independent	Binding Up
chr02:625115-625151;-	204.68	1.29412	0.384718	11.4504	0.000714775	0.00159032	YBR208C	DUR1%2C2	IME4-independent	No change
chr02:631149-631226;+	819.923	-2.99422	0.240408	161.573	5.12727e-37	2.11096e-35	YBR212W	NGR1	IME4-dependent	Binding Down
chr02:633250-633322;+	857.317	-3.00777	0.262012	133.826	5.96456e-31	1.82278e-29	YBR212W	NGR1	IME4-dependent	Binding Down
chr02:636331-636364;+	866.986	-3.87853	0.301259	171.518	3.44781e-39	1.61376e-37	YBR214W	SDS24	IME4-dependent	Binding Down
chr02:641844-641891;-	218.241	0.775435	0.371233	4.41536	0.0356168	0.0543201	YBR218C	PYC2	IME4-independent	No change
chr02:641897-641955;-	235.331	0.715739	0.339743	4.48786	0.0341364	0.0522324	YBR218C	PYC2	IME4-independent	No change
chr02:642640-642768;-	288.461	-0.822739	0.288544	8.50394	0.00354378	0.00676574	YBR218C	PYC2	IME4-independent	No change
chr02:644061-644132;-	203.914	0.570621	0.403956	2.00004	0.157295	0.205468	YBR218C	PYC2	IME4-independent	No change
chr02:644530-644611;-	214.224	-2.66074	0.553747	34.076	5.30008e-09	2.86352e-08	YBR218C	PYC2	IME4-dependent	Binding Down
chr02:648218-648246;-	875.639	2.14269	0.378474	32.0885	1.47305e-08	7.37601e-08	YBR221C	PDB1	IME4-independent	Binding Up
chr02:648311-648355;-	763.002	2.02098	0.319889	41.9925	9.16222e-11	6.27732e-10	YBR221C	PDB1	IME4-independent	Binding Up
chr02:648365-648399;-	772.748	1.96164	0.302142	44.2812	2.84438e-11	2.0957e-10	YBR221C	PDB1	IME4-independent	No change
chr02:648640-648677;-	731.778	0.0404056	0.332206	0.0147986	0.903177	0.922292	YBR221C	PDB1	IME4-independent	No change
chr02:649575-649627;-	765.783	1.33341	0.298912	20.0667	7.47877e-06	2.4551e-05	YBR221C	PDB1	IME4-independent	No change
chr02:662756-662792;-	963.494	2.08405	0.328937	39.8819	2.69795e-10	1.72735e-09	YBR230C	OM14	IME4-independent	Binding Up
chr02:662916-662957;-	830.636	2.28309	0.436075	27.2962	1.74553e-07	7.49178e-07	YBR230C	OM14	IME4-independent	Binding Up
chr02:668631-668696;-	204.143	1.93332	0.314585	40.689	1.7849e-10	1.17492e-09	YBR234C	ARC40	IME4-independent	No change
chr02:685808-685877;-	233.993	-0.469124	0.29701	2.47311	0.115809	0.155886	YBR241C	YBR241C	IME4-independent	No change
chr02:685891-685955;-	235.575	-0.308626	0.295203	1.08422	0.297756	0.360509	YBR241C	YBR241C	IME4-independent	No change
chr02:685971-686037;-	252.644	0.238455	0.287458	0.697406	0.403657	0.469428	YBR241C	YBR241C	IME4-independent	No change
chr02:686098-686133;-	270.912	-0.000151015	0.266584	3.19787e-07	0.999549	0.999549	YBR241C	YBR241C	IME4-independent	No change
chr02:686245-686322;-	301.742	-0.0283802	0.247343	0.013156	0.908683	0.925968	YBR241C	YBR241C	IME4-independent	No change
chr02:686733-686772;-	200.473	0.421315	0.368382	1.34584	0.246006	0.305336	YBR241C	YBR241C	IME4-independent	No change
chr02:706193-706348;+	230.806	-0.73927	0.243974	9.34578	0.002235	0.00447755	YBR252W	DUT1	IME4-independent	No change
chr02:712547-712606;+	517.605	-4.46849	0.568506	144.105	3.36922e-33	1.13926e-31	YBR257W	POP4	IME4-dependent	Binding Down
chr02:712680-712706;+	327.237	-2.65226	0.461157	52.672	3.9417e-13	3.50886e-12	YBR257W	POP4	IME4-dependent	Binding Down
chr02:718858-718961;-	489.866	-1.93906	0.226134	76.7277	1.96233e-18	2.76561e-17	YBR262C	AIM5	IME4-independent	No change
chr02:722742-722835;+	260.986	-1.47988	0.284483	29.6587	5.15207e-08	2.39631e-07	YBR265W	TSC10	IME4-independent	No change
chr02:725334-725373;-	221.894	1.24069	0.308767	16.181	5.75681e-05	0.000161351	YBR269C	FMP21	IME4-independent	No change
chr02:725694-725760;-	237.641	1.38323	0.711085	3.77846	0.0519165	0.0762752	YBR269C	FMP21	IME4-independent	No change
chr02:734495-734550;-	213.079	-2.28977	0.482304	27.5196	1.55513e-07	6.71346e-07	YBR275C	RIF1	IME4-dependent	Binding Down
chr02:734557-734637;-	312.772	-3.8532	0.515454	79.3595	5.17761e-19	7.5236e-18	YBR275C	RIF1	IME4-dependent	Binding Down
chr02:738185-738210;-	210.994	-4.16621	0.764897	59.0602	1.52922e-14	1.54538e-13	YBR275C	RIF1	IME4-dependent	Binding Down
chr02:740811-740865;-	211.824	-4.99191	0.402033	262.022	6.2209e-59	6.28665e-57	YBR276C	PPS1	IME4-dependent	Binding Down
chr02:745888-745938;-	290.102	1.04023	0.386338	7.40031	0.00652127	0.0118089	YBR280C	SAF1	IME4-independent	No change
chr02:745952-746023;-	362.697	1.12955	0.283818	16.2291	5.6125e-05	0.00015755	YBR280C	SAF1	IME4-independent	No change
chr02:746061-746112;-	292.827	1.83422	0.412019	22.2233	2.42709e-06	8.69977e-06	YBR280C	SAF1	IME4-independent	No change
chr02:746382-746419;-	273.541	1.23512	0.452586	7.73498	0.00541612	0.00998457	YBR280C	SAF1	IME4-independent	No change
chr02:746715-746756;-	264.981	1.51302	0.49811	9.904	0.0016492	0.00339813	YBR280C	SAF1	IME4-independent	No change
chr02:747064-747095;-	256.361	1.80208	0.577679	10.9035	0.000959837	0.00207634	YBR280C	SAF1	IME4-independent	No change
chr02:747656-747742;-	301.61	-0.655313	0.367042	3.33422	0.0678528	0.0969808	YBR280C	SAF1	IME4-independent	No change
chr02:752089-752130;-	244.825	0.748241	0.386889	3.58787	0.0582028	0.0846301	YBR283C	SSH1	IME4-independent	No change
chr02:752575-752653;-	288.609	1.4519	0.30061	22.8041	1.79381e-06	6.56204e-06	YBR283C	SSH1	IME4-independent	No change
chr02:753037-753077;-	214.002	2.40337	0.558724	20.1997	6.97652e-06	2.30726e-05	YBR283C	SSH1	IME4-independent	Binding Up
chr02:753598-753669;-	253.269	3.11219	0.443974	61.781	3.83851e-15	4.11276e-14	YBR283C	SSH1	IME4-independent	Binding Up
chr02:753673-753747;-	267.777	1.99292	0.338747	35.5633	2.46895e-09	1.39939e-08	YBR283C	SSH1	IME4-independent	No change
chr02:757579-757724;+	495.333	2.47298	0.452277	29.3136	6.1563e-08	2.82789e-07	YBR285W	YBR285W	IME4-independent	Binding Up
chr02:757912-758052;+	450.306	1.27628	0.272292	23.1215	1.5208e-06	5.64431e-06	YBR286W	APE3	IME4-independent	No change
chr02:758217-758251;+	360.77	0.937092	0.358274	7.03725	0.00798316	0.0141282	YBR286W	APE3	IME4-independent	No change
chr02:758282-758406;+	398.552	0.822182	0.29876	7.72394	0.00544934	0.0100437	YBR286W	APE3	IME4-independent	No change
chr02:758591-758667;+	348.995	0.673421	0.377211	3.224	0.072566	0.103055	YBR286W	APE3	IME4-independent	No change
chr02:758771-758822;+	355.135	1.7725	0.409299	21.3391	3.84803e-06	1.32741e-05	YBR286W	APE3	IME4-independent	No change
chr02:758852-758911;+	351.712	1.51714	0.408042	15.1453	9.95436e-05	0.000266078	YBR286W	APE3	IME4-independent	No change
chr02:759122-759149;+	316.058	-0.613101	0.507552	1.50804	0.219439	0.276256	YBR286W	APE3	IME4-independent	No change
chr02:759226-759292;+	378.696	1.44008	0.34438	18.9104	1.37004e-05	4.31437e-05	YBR286W	APE3	IME4-independent	No change
chr02:759352-759437;+	393.155	1.41975	0.324874	20.5613	5.77508e-06	1.93438e-05	YBR286W	APE3	IME4-independent	No change
chr02:759510-759601;+	416.795	0.924205	0.286621	10.666	0.00109125	0.00233617	YBR286W	APE3	IME4-independent	No change
chr02:761039-761129;+	244.099	1.27435	0.26342	24.5	7.43117e-07	2.89214e-06	YBR287W	YBR287W	IME4-independent	No change
chr02:766946-767005;-	227.595	0.200742	0.262276	0.58594	0.443993	0.509672	YBR291C	CTP1	IME4-independent	No change
chr02:780003-780076;-	311.278	-0.0577737	0.594151	0.0094939	0.92238	0.93799	YBR296C	PHO89	IME4-independent	No change
chr03:38060-38167;-	355.667	-5.25464	0.383193	329.619	1.16331e-73	1.91581e-71	YCL061C	MRC1	IME4-dependent	Binding Down
chr03:44193-44339;+	398.649	2.27971	0.282965	68.7587	1.11279e-16	1.38794e-15	YCL057W	PRD1	IME4-independent	Binding Up
chr03:44518-44597;+	311.259	2.12743	0.417561	27.0075	2.02665e-07	8.62757e-07	YCL057W	PRD1	IME4-independent	Binding Up
chr03:44879-44938;+	341.506	1.72614	0.34196	25.3802	4.70731e-07	1.89079e-06	YCL057W	PRD1	IME4-independent	No change
chr03:45079-45159;+	324.4	0.267848	0.377303	0.493915	0.482186	0.547298	YCL057W	PRD1	IME4-independent	No change
chr03:45653-45706;+	311.301	2.28326	0.421493	31.2173	2.307e-08	1.12664e-07	YCL057W	PRD1	IME4-independent	Binding Up
chr03:45902-45974;+	319.372	0.792427	0.37204	4.36083	0.0367744	0.0559033	YCL057W	PRD1	IME4-independent	No change
chr03:46225-46298;+	335.782	2.22052	0.359059	40.2892	2.19018e-10	1.42482e-09	YCL057W	PRD1	IME4-independent	Binding Up
chr03:46334-46394;+	344.655	2.91973	0.383125	68.3954	1.33792e-16	1.65023e-15	YCL057W	PRD1	IME4-independent	Binding Up
chr03:54072-54217;-	203.584	1.09728	0.364005	9.16802	0.00246281	0.00490192	YCL052C	PBN1	IME4-independent	No change
chr03:68041-68075;-	863.922	1.78101	0.400983	19.5811	9.64163e-06	3.11307e-05	YCL043C	PDI1	IME4-independent	No change
chr03:69056-69084;-	736.956	2.14742	0.275918	63.2006	1.8669e-15	2.08573e-14	YCL043C	PDI1	IME4-independent	Binding Up
chr03:69209-69244;-	850.203	2.38621	0.230003	114.628	9.49379e-27	2.35183e-25	YCL043C	PDI1	IME4-independent	Binding Up
chr03:71798-71830;+	513.85	0.652187	0.468073	1.93922	0.163753	0.212872	YCL040W	GLK1	IME4-independent	No change
chr03:71869-71896;+	570.48	-0.0742204	0.289133	0.0657595	0.797614	0.833609	YCL040W	GLK1	IME4-independent	No change
chr03:72929-72988;+	395.15	-2.89585	0.266838	170.974	4.53465e-39	2.11134e-37	YCL039W	GID7	IME4-dependent	Binding Down
chr03:74306-74369;+	212.134	-0.148115	0.258754	0.328649	0.566456	0.628273	YCL039W	GID7	IME4-independent	No change
chr03:76554-76641;-	493.67	-1.22219	0.387534	9.94143	0.001616	0.00333435	YCL037C	SRO9	IME4-independent	No change
chr03:80186-80305;-	390.051	1.7755	0.251436	51.7701	6.23946e-13	5.456e-12	YCL035C	GRX1	IME4-independent	No change
chr03:90711-90858;+	201.95	-2.14568	0.283325	62.8579	2.2217e-15	2.45479e-14	YCL028W	RNQ1	IME4-dependent	Binding Down
chr03:95399-95453;-	255.061	1.90277	0.9917	3.66241	0.055653	0.0811748	YCL025C	AGP1	IME4-independent	No change
chr03:95501-95560;-	284.188	0.394626	0.817135	0.2342	0.628427	0.685802	YCL025C	AGP1	IME4-independent	No change
chr03:96109-96147;-	233.662	1.83838	0.462028	16.5415	4.75968e-05	0.000135623	YCL025C	AGP1	IME4-independent	No change
chr03:101685-101780;+	1187.67	-6.8268	0.331302	656.116	1.04453e-144	1.32699e-141	YCL024W	KCC4	IME4-dependent	Binding Down
chr03:104576-104631;+	256.61	-1.37966	0.513414	7.28474	0.0069543	0.0124812	YCL018W	LEU2	IME4-independent	No change
chr03:106440-106487;+	251.867	-1.07911	0.535971	4.02139	0.0449266	0.0669458	YCL018W	LEU2	IME4-independent	No change
chr03:106732-106785;+	292.669	-1.89962	0.413419	22.1351	2.54122e-06	9.06138e-06	YCL018W	LEU2	IME4-independent	No change
chr03:106868-106935;-	258.863	1.28598	0.311827	17.6405	2.66845e-05	7.94726e-05	YCL017C	NFS1	IME4-independent	No change
chr03:106966-107020;-	219.693	1.42997	0.369415	15.8288	6.93383e-05	0.00019132	YCL017C	NFS1	IME4-independent	No change
chr03:107266-107364;-	231.115	1.41572	0.348052	17.4361	2.97127e-05	8.78149e-05	YCL017C	NFS1	IME4-independent	No change
chr03:108589-108626;-	200.414	0.673095	0.399316	2.84147	0.0918601	0.126983	YCL017C	NFS1	IME4-independent	No change
chr03:118805-118969;-	425.642	0.454304	0.34193	1.76675	0.183784	0.235707	YCL009C	ILV6	IME4-independent	No change
chr03:118995-119110;-	271.991	0.580456	0.370221	2.46272	0.116577	0.156746	YCL009C	ILV6	IME4-independent	No change
chr03:119294-119361;-	201.263	0.508664	0.429586	1.40384	0.236081	0.294478	YCL009C	ILV6	IME4-independent	No change
chr03:126765-126806;+	217.318	1.5417	0.285986	29.5892	5.34012e-08	2.47859e-07	YCL001W	RER1	IME4-independent	No change
chr03:133793-133868;-	565.457	-1.72413	0.27761	38.7215	4.88805e-10	3.02081e-09	YCR004C	YCP4	IME4-independent	No change
chr03:135192-135300;-	8254.4	-0.639191	0.214179	8.8913	0.00286532	0.00560521	YCR005C	CIT2	IME4-independent	No change
chr03:142086-142134;+	236.239	1.05057	0.292777	13.0996	0.00029536	0.000714342	YCR008W	SAT4	IME4-independent	No change
chr03:143826-143870;+	248.362	-2.30703	0.389316	47.5064	5.48236e-12	4.36088e-11	YCR008W	SAT4	IME4-dependent	Binding Down
chr03:144046-144080;+	349.992	-2.69844	0.334364	92.9681	5.3145e-22	9.72466e-21	YCR008W	SAT4	IME4-dependent	Binding Down
chr03:144131-144164;+	201.792	0.261939	0.32722	0.637551	0.424599	0.49083	YCR008W	SAT4	IME4-independent	No change
chr03:144167-144204;+	247.802	0.715917	0.277833	6.64595	0.00993814	0.0171845	YCR008W	SAT4	IME4-independent	No change
chr03:144567-144642;-	212.6	-0.605538	0.302202	4.14493	0.0417594	0.0626567	YCR009C	RVS161	IME4-independent	No change
chr03:146102-146132;-	14516.3	0.257286	0.607253	0.179428	0.671865	0.725461	YCR010C	ADY2	IME4-independent	No change
chr03:146133-146184;-	16811.5	0.564479	0.407128	1.91903	0.165963	0.215336	YCR010C	ADY2	IME4-independent	No change
chr03:146206-146307;-	17532.3	1.12618	0.300329	13.9751	0.000185246	0.000465103	YCR010C	ADY2	IME4-independent	No change
chr03:147704-147756;-	329.528	0.495985	0.399531	1.55397	0.212551	0.268459	YCR011C	ADP1	IME4-independent	No change
chr03:147768-147821;-	340.724	0.325653	0.367602	0.787967	0.374715	0.440437	YCR011C	ADP1	IME4-independent	No change
chr03:147948-147991;-	359.433	-2.7879	0.462515	48.5612	3.20138e-12	2.61191e-11	YCR011C	ADP1	IME4-dependent	Binding Down
chr03:148363-148459;-	331.506	1.07329	0.41737	6.89307	0.00865303	0.0152138	YCR011C	ADP1	IME4-independent	No change
chr03:150565-150600;-	286.553	1.49368	0.621092	6.44311	0.0111384	0.0191039	YCR011C	ADP1	IME4-independent	No change
chr03:150625-150674;-	294.917	1.79908	0.608085	10.1647	0.00143154	0.00299334	YCR011C	ADP1	IME4-independent	No change
chr03:151705-151872;+	693.471	0.114821	0.934557	0.0151136	0.902157	0.921534	YCR012W	PGK1	IME4-independent	No change
chr03:151952-151992;+	475.279	-0.714188	0.950086	0.565652	0.451992	0.517785	YCR012W	PGK1	IME4-independent	No change
chr03:152048-152128;+	533.9	-0.0519768	1.19237	0.00190247	0.965209	0.971876	YCR012W	PGK1	IME4-independent	No change
chr03:152404-152522;+	603.172	-0.138698	1.03808	0.0178762	0.893638	0.914093	YCR012W	PGK1	IME4-independent	No change
chr03:152760-152829;+	569.461	0.432109	0.980471	0.194394	0.659284	0.713957	YCR012W	PGK1	IME4-independent	No change
chr03:152901-152959;+	531.756	-0.0907582	1.16608	0.00606876	0.937906	0.950193	YCR012W	PGK1	IME4-independent	No change
chr03:152972-153029;+	552.674	-0.226817	0.789504	0.0826886	0.773686	0.813996	YCR012W	PGK1	IME4-independent	No change
chr03:153040-153106;+	565.406	-0.172636	0.702669	0.0604781	0.805742	0.840031	YCR012W	PGK1	IME4-independent	No change
chr03:158668-158719;-	314.295	-3.89963	0.361603	214.388	1.51551e-48	1.01334e-46	YCR017C	CWH43	IME4-dependent	Binding Down
chr03:182662-182719;-	1089.42	0.754744	0.267076	7.98905	0.00470611	0.00876836	YCR024C-A	PMP1	IME4-independent	No change
chr03:182834-182902;-	1096.23	0.025714	0.246967	0.010859	0.917006	0.933379	YCR024C-A	PMP1	IME4-independent	No change
chr03:182948-182992;-	881.512	-0.138808	0.227731	0.371797	0.542027	0.604495	YCR024C-A	PMP1	IME4-independent	No change
chr03:184074-184147;-	427.399	-4.66657	0.309285	355.421	2.79735e-79	5.52818e-77	YCR026C	NPP1	IME4-dependent	Binding Down
chr03:191965-192024;-	346.132	-0.994815	0.260226	15.2927	9.20722e-05	0.000248255	YCR028C-A	RIM1	IME4-independent	No change
chr03:192074-192127;-	408.42	-2.64508	0.299058	104.346	1.69868e-24	3.61396e-23	YCR028C-A	RIM1	IME4-dependent	Binding Down
chr03:198840-198884;-	359.359	-4.9834	0.501629	243.533	6.67465e-55	5.877e-53	YCR030C	SYP1	IME4-dependent	Binding Down
chr03:203736-203814;-	798.762	0.591535	0.522166	1.28273	0.257393	0.318004	snR189	snR189	IME4-independent	No change
chr03:238954-239008;+	239.334	-1.56331	0.236776	43.7794	3.6756e-11	2.65965e-10	YCR048W	ARE1	IME4-independent	No change
chr03:239387-239411;+	443.769	-5.75388	0.564373	131.216	2.22022e-30	6.58148e-29	YCR051W	YCR051W	IME4-dependent	Binding Down
chr03:252780-252825;+	312.979	2.13366	0.421443	25.4093	4.6367e-07	1.8658e-06	YCR061W	YCR061W	IME4-independent	Binding Up
chr03:252865-252905;+	216.437	1.79316	0.417596	18.3475	1.84063e-05	5.65805e-05	YCR061W	YCR061W	IME4-independent	No change
chr03:252912-252954;+	346.22	1.45178	0.383089	14.2336	0.000161462	0.000410957	YCR061W	YCR061W	IME4-independent	No change
chr03:256562-256598;+	203.995	-1.3142	0.386908	11.8691	0.000570725	0.00129873	YCR065W	HCM1	IME4-independent	No change
chr03:256686-256769;+	351.962	-0.444582	0.331371	1.79479	0.180343	0.231795	YCR065W	HCM1	IME4-independent	No change
chr03:256818-256882;+	314.994	-0.366175	0.372887	0.965093	0.325907	0.390605	YCR065W	HCM1	IME4-independent	No change
chr03:264654-264787;+	303.456	-0.390375	0.220277	3.15132	0.0758655	0.107178	YCR069W	CPR4	IME4-independent	No change
chr03:273146-273273;+	240.459	0.346192	0.282138	1.51069	0.219034	0.275784	YCR073W-A	SOL2	IME4-independent	No change
chr03:284895-284975;+	1174.97	-3.82652	0.249265	248.868	4.58479e-56	4.16047e-54	YCR082W	AHC2	IME4-dependent	Binding Down
chr03:285780-285876;-	342.926	-1.13086	0.401393	7.95351	0.00479943	0.00893102	YCR084C	TUP1	IME4-independent	No change
chr03:302272-302326;+	540.217	-5.65951	0.315709	603.209	3.35549e-133	3.73005e-130	YCR091W	KIN82	IME4-dependent	Binding Down
chr03:309928-310019;+	494.724	-1.98935	0.439375	23.2701	1.40773e-06	5.26005e-06	YCR093W	CDC39	IME4-independent	No change
chr03:311051-311103;+	496.464	-0.162965	0.411449	0.156583	0.692322	0.744207	YCR093W	CDC39	IME4-independent	No change
chr03:311213-311268;+	466.254	0.182855	0.388634	0.220934	0.638329	0.694733	YCR093W	CDC39	IME4-independent	No change
chr03:311940-311985;+	595.588	-1.41346	0.840767	2.80024	0.0942499	0.129934	YCR093W	CDC39	IME4-independent	No change
chr03:312029-312067;+	509.402	-0.254026	0.369592	0.474318	0.491007	0.556224	YCR093W	CDC39	IME4-independent	No change
chr03:312093-312281;+	1209.3	0.422822	0.319286	1.7513	0.185714	0.237907	YCR093W	CDC39	IME4-independent	No change
chr03:313260-313282;+	293.896	1.86023	0.298214	39.4385	3.38563e-10	2.13535e-09	YCR094W	CDC50	IME4-independent	No change
chr04:37079-37115;+	345.869	-4.83461	0.455091	187.138	1.33969e-42	7.04961e-41	YDL240W	LRG1	IME4-dependent	Binding Down
chr04:38639-38702;-	342.525	0.531588	0.488003	1.15233	0.283062	0.344879	YDL239C	ADY3	IME4-independent	No change
chr04:38830-38876;-	459.683	-4.42309	1.06251	40.1658	2.33295e-10	1.51437e-09	YDL239C	ADY3	IME4-dependent	Binding Down
chr04:42813-42907;+	328.868	-3.31654	0.278593	185.02	3.88439e-42	1.98528e-40	YDL237W	AIM6	IME4-dependent	Binding Down
chr04:72776-72862;-	533.607	0.315909	0.390111	0.658394	0.417127	0.483135	YDL223C	HBT1	IME4-independent	No change
chr04:72888-72972;-	535.103	0.188203	0.375912	0.250893	0.616447	0.675048	YDL223C	HBT1	IME4-independent	No change
chr04:73143-73211;-	480.172	0.0902787	0.391937	0.0532627	0.81748	0.849778	YDL223C	HBT1	IME4-independent	No change
chr04:75224-75264;-	440.315	0.043319	0.474283	0.00837146	0.927099	0.941927	YDL223C	HBT1	IME4-independent	No change
chr04:75555-75590;-	467.635	-0.750312	0.400068	3.49445	0.0615749	0.0890673	YDL223C	HBT1	IME4-independent	No change
chr04:75661-75721;-	551.67	-3.37831	0.394407	85.1501	2.76559e-20	4.46424e-19	YDL223C	HBT1	IME4-dependent	Binding Down
chr04:76452-76491;-	490.783	-0.0224586	0.251032	0.0080091	0.92869	0.94303	YDL222C	FMP45	IME4-independent	No change
chr04:76572-76609;-	349.253	0.158298	0.445532	0.12669	0.721889	0.770402	YDL222C	FMP45	IME4-independent	No change
chr04:86275-86391;-	1600.3	1.53917	0.19352	64.3109	1.06256e-15	1.21613e-14	YDL215C	GDH2	IME4-independent	No change
chr04:86408-86445;-	1248.27	2.13472	0.373043	36.0388	1.93425e-09	1.11407e-08	YDL215C	GDH2	IME4-independent	Binding Up
chr04:86553-86600;-	1340.13	1.53148	0.263615	34.4636	4.34306e-09	2.38266e-08	YDL215C	GDH2	IME4-independent	No change
chr04:87091-87147;-	1280.65	1.66551	0.308667	30.1683	3.96132e-08	1.87483e-07	YDL215C	GDH2	IME4-independent	No change
chr04:88187-88285;-	1411.28	-0.587219	0.239957	6.21774	0.0126477	0.0214526	YDL215C	GDH2	IME4-independent	No change
chr04:88394-88599;-	1582.01	1.66822	0.191987	77.2808	1.483e-18	2.10005e-17	YDL215C	GDH2	IME4-independent	No change
chr04:89346-89484;-	1450.38	1.05306	0.208826	25.3961	4.66858e-07	1.87693e-06	YDL215C	GDH2	IME4-independent	No change
chr04:89590-89621;-	1259.54	1.50003	0.331785	20.8706	4.9138e-06	1.6647e-05	YDL215C	GDH2	IME4-independent	No change
chr04:89680-89786;-	1442.38	0.673296	0.262231	6.54209	0.0105352	0.0181428	YDL215C	GDH2	IME4-independent	No change
chr04:94812-94922;+	232.921	-1.93939	0.276437	52.1998	5.01308e-13	4.43155e-12	YDL212W	SHR3	IME4-independent	No change
chr04:110759-110844;+	296.855	0.640676	0.39445	2.79171	0.0947531	0.13048	YDL204W	RTN2	IME4-independent	No change
chr04:111132-111192;+	286.529	-0.373647	0.363693	1.03863	0.308141	0.371566	YDL204W	RTN2	IME4-independent	No change
chr04:111298-111335;+	253.244	-0.0365488	0.46108	0.00627032	0.936885	0.949376	YDL204W	RTN2	IME4-independent	No change
chr04:111692-111804;+	318.183	0.142205	0.339842	0.17672	0.674207	0.727372	YDL204W	RTN2	IME4-independent	No change
chr04:111879-111975;+	359.23	0.605513	0.331987	3.45924	0.0628992	0.0907466	YDL204W	RTN2	IME4-independent	No change
chr04:117384-117480;-	428.017	1.27443	0.352896	12.9224	0.000324674	0.000778885	YDL199C	YDL199C	IME4-independent	No change
chr04:117768-117816;-	390.397	2.84556	0.537667	34.2556	4.83287e-09	2.63027e-08	YDL199C	YDL199C	IME4-independent	Binding Up
chr04:117872-117962;-	420.418	2.33343	0.414349	34.8167	3.62246e-09	2.01089e-08	YDL199C	YDL199C	IME4-independent	Binding Up
chr04:118054-118119;-	391.909	1.88056	0.47394	16.3834	5.17365e-05	0.000146433	YDL199C	YDL199C	IME4-independent	No change
chr04:118231-118267;-	389.188	3.66525	0.651262	47.3951	5.8029e-12	4.60349e-11	YDL199C	YDL199C	IME4-independent	Binding Up
chr04:118914-119001;-	428.009	2.84875	0.422294	54.7766	1.35039e-13	1.26145e-12	YDL199C	YDL199C	IME4-independent	Binding Up
chr04:119028-119068;-	409.6	3.35908	0.520704	56.6034	5.3319e-14	5.1428e-13	YDL199C	YDL199C	IME4-independent	Binding Up
chr04:119460-119487;-	371.744	3.9999	0.897675	33.2553	8.08178e-09	4.22027e-08	YDL199C	YDL199C	IME4-independent	Binding Up
chr04:123193-123262;+	223.915	-2.68803	0.514103	33.7902	6.13865e-09	3.2748e-08	YDL195W	SEC31	IME4-dependent	Binding Down
chr04:123333-123415;+	201.065	0.27673	0.46671	0.352197	0.552872	0.614971	YDL195W	SEC31	IME4-independent	No change
chr04:123719-123793;+	206.073	-0.072165	0.433822	0.0277277	0.867751	0.892334	YDL195W	SEC31	IME4-independent	No change
chr04:126155-126232;+	207.505	-0.022916	0.701963	0.00106903	0.973917	0.979609	YDL195W	SEC31	IME4-independent	No change
chr04:126640-126723;+	207.855	-0.776787	0.44463	3.09726	0.0784243	0.110335	YDL195W	SEC31	IME4-independent	No change
chr04:127068-127226;+	288.79	-0.604401	0.34878	3.00914	0.0827964	0.115711	YDL195W	SEC31	IME4-independent	No change
chr04:129880-129910;+	207.283	1.35238	0.388955	12.2785	0.000458219	0.00106146	YDL194W	SNF3	IME4-independent	No change
chr04:130257-130311;+	200.988	1.07184	0.39752	7.24313	0.00711727	0.0127403	YDL194W	SNF3	IME4-independent	No change
chr04:130335-130511;+	428.863	1.64427	0.216712	59.4695	1.24205e-14	1.26815e-13	YDL194W	SNF3	IME4-independent	No change
chr04:130695-130903;+	628.702	1.89557	0.34343	30.3681	3.57365e-08	1.69858e-07	YDL193W	NUS1	IME4-independent	No change
chr04:131171-131270;+	568.889	0.507368	0.286889	3.02513	0.0819837	0.114708	YDL193W	NUS1	IME4-independent	No change
chr04:131396-131470;+	521.728	1.96351	0.322747	36.7576	1.33771e-09	7.83161e-09	YDL193W	NUS1	IME4-independent	No change
chr04:131691-131798;+	567.803	1.7959	0.27073	43.2977	4.70139e-11	3.34476e-10	YDL193W	NUS1	IME4-independent	No change
chr04:131808-131936;+	601.439	1.93209	0.250818	59.1178	1.4851e-14	1.50422e-13	YDL193W	NUS1	IME4-independent	No change
chr04:131939-132008;+	525.106	1.7392	0.316993	29.3684	5.98471e-08	2.75619e-07	YDL193W	NUS1	IME4-independent	No change
chr04:143492-143561;+	296.43	1.59265	0.406549	16.1674	5.7985e-05	0.000162402	YDL185W	TFP1	IME4-independent	No change
chr04:143671-143750;+	360.315	2.10445	0.330924	44.8376	2.14075e-11	1.59712e-10	YDL185W	TFP1	IME4-independent	Binding Up
chr04:144091-144159;+	325.715	0.953985	0.337029	8.02369	0.00461693	0.00861666	YDL185W	TFP1	IME4-independent	No change
chr04:144507-144588;+	320.654	0.620964	0.33333	3.4555	0.0630415	0.0909078	YDL185W	TFP1	IME4-independent	No change
chr04:149895-149977;+	380.884	2.42636	0.37374	42.4942	7.0892e-11	4.92533e-10	YDL181W	INH1	IME4-independent	Binding Up
chr04:149981-150016;+	275.742	3.16868	0.623642	26.006	3.40353e-07	1.39546e-06	YDL181W	INH1	IME4-independent	Binding Up
chr04:160424-160515;-	244.96	0.986647	0.29922	10.9795	0.00092126	0.00200067	YDL174C	DLD1	IME4-independent	No change
chr04:161229-161363;-	223.98	1.79772	0.343379	29.6024	5.30383e-08	2.46303e-07	YDL174C	DLD1	IME4-independent	No change
chr04:163870-163914;-	440.582	-2.02429	0.32579	39.5566	3.18694e-10	2.02006e-09	YDL171C	GLT1	IME4-dependent	Binding Down
chr04:164014-164077;-	608.378	-3.39974	0.291245	154.982	1.41304e-35	5.46354e-34	YDL171C	GLT1	IME4-dependent	Binding Down
chr04:173272-173317;-	205.379	1.67998	0.328605	27.9818	1.22463e-07	5.36484e-07	YDL169C	UGX2	IME4-independent	No change
chr04:179527-179565;-	678.171	-6.0367	0.431105	214.496	1.43538e-48	9.67031e-47	YDL164C	CDC9	IME4-dependent	Binding Down
chr04:184537-184571;-	404.627	1.94284	0.308541	40.849	1.64453e-10	1.09141e-09	YDL160C	DHH1	IME4-independent	No change
chr04:184685-184803;-	586.57	1.39874	0.329074	17.9573	2.25918e-05	6.81509e-05	YDL160C	DHH1	IME4-independent	No change
chr04:184937-185006;-	430.483	1.42442	0.297466	22.8692	1.73408e-06	6.36711e-06	YDL160C	DHH1	IME4-independent	No change
chr04:185097-185136;-	371.662	-0.815252	0.369439	5.18148	0.0228289	0.0363896	YDL160C	DHH1	IME4-independent	No change
chr04:186748-186784;-	366.986	2.37219	0.36599	45.1112	1.86156e-11	1.3994e-10	YDL160C	DHH1	IME4-independent	Binding Up
chr04:192731-192834;+	374.855	-2.94792	0.313717	108.791	1.803e-25	4.07992e-24	YDL155W	CLB3	IME4-dependent	Binding Down
chr04:193174-193249;+	415.357	0.624086	0.520159	1.3617	0.243244	0.302245	YDL154W	MSH5	IME4-independent	No change
chr04:193280-193364;+	462.248	-1.37816	0.562728	7.32033	0.0068179	0.0122736	YDL154W	MSH5	IME4-independent	No change
chr04:193386-193426;+	412.988	-0.967932	0.706684	2.17757	0.140035	0.185042	YDL154W	MSH5	IME4-independent	No change
chr04:193524-193613;+	428.803	1.7827	0.437363	15.6261	7.71805e-05	0.00021169	YDL154W	MSH5	IME4-independent	No change
chr04:193806-193900;+	425.812	1.3661	0.449754	8.59165	0.00337708	0.00648928	YDL154W	MSH5	IME4-independent	No change
chr04:193991-194062;+	414.382	0.125957	0.567612	0.0484091	0.825855	0.856382	YDL154W	MSH5	IME4-independent	No change
chr04:194579-194645;+	424.759	2.23187	1.06156	4.31917	0.0376852	0.057122	YDL154W	MSH5	IME4-independent	No change
chr04:195635-195814;+	474.808	1.66605	0.345853	22.1938	2.46463e-06	8.81302e-06	YDL154W	MSH5	IME4-independent	No change
chr04:200648-200758;+	245.06	0.838522	0.399511	4.46398	0.0346167	0.0529218	YDL149W	ATG9	IME4-independent	No change
chr04:200782-200871;+	235.898	0.726325	0.421659	2.99057	0.0837505	0.116867	YDL149W	ATG9	IME4-independent	No change
chr04:201343-201418;+	246.395	-0.173545	0.394192	0.194674	0.659054	0.713957	YDL149W	ATG9	IME4-independent	No change
chr04:202173-202257;+	230.725	1.12817	0.447111	6.60711	0.0101572	0.0175326	YDL149W	ATG9	IME4-independent	No change
chr04:202472-202519;+	213.017	0.128716	0.519224	0.0613082	0.80444	0.839362	YDL149W	ATG9	IME4-independent	No change
chr04:202588-202683;+	264.146	1.09081	0.361654	9.38096	0.00219251	0.00439902	YDL149W	ATG9	IME4-independent	No change
chr04:206940-207036;+	817.962	2.54345	0.265584	94.9713	1.93163e-22	3.6317e-21	YDL147W	RPN5	IME4-independent	Binding Up
chr04:209072-209148;-	394.119	-3.10204	0.294208	146.54	9.89331e-34	3.43677e-32	YDL145C	COP1	IME4-dependent	Binding Down
chr04:209172-209215;-	263.573	-0.369969	0.301712	1.50025	0.220632	0.277483	YDL145C	COP1	IME4-independent	No change
chr04:209250-209283;-	212.518	0.214491	0.373818	0.331397	0.564837	0.626779	YDL145C	COP1	IME4-independent	No change
chr04:209333-209364;-	211.829	0.00454443	0.374129	0.000147359	0.990315	0.991988	YDL145C	COP1	IME4-independent	No change
chr04:219923-220033;-	1098.05	-1.47364	0.301327	23.7386	1.10347e-06	4.19009e-06	YDL140C	RPO21	IME4-independent	No change
chr04:230313-230373;+	312.847	-0.324399	0.222178	2.13242	0.144213	0.190082	YDL138W	RGT2	IME4-independent	No change
chr04:231318-231361;+	380.804	0.19688	0.301441	0.425857	0.514029	0.57886	YDL137W	ARF2	IME4-independent	No change
chr04:231590-231667;+	504.804	1.01613	0.23484	18.9775	1.32267e-05	4.17258e-05	YDL137W	ARF2	IME4-independent	No change
chr04:231692-231827;+	797.08	-0.243271	0.191817	1.6148	0.203818	0.258641	YDL137W	ARF2	IME4-independent	No change
chr04:233221-233256;-	222.523	-0.971815	0.314832	9.98709	0.00157641	0.00326176	YDL135C	RDI1	IME4-independent	No change
chr04:236170-236215;-	586.152	0.98656	0.208653	22.9824	1.6349e-06	6.03284e-06	YDL133C-A	RPL41B	IME4-independent	No change
chr04:236262-236303;-	591.06	0.538198	0.335847	2.57379	0.108647	0.147556	YDL133C-A	RPL41B	IME4-independent	No change
chr04:238723-238773;+	218.633	0.334487	0.444117	0.560033	0.454247	0.519832	YDL132W	CDC53	IME4-independent	No change
chr04:238779-238921;+	256.397	0.938692	0.343097	7.44887	0.00634762	0.0115415	YDL132W	CDC53	IME4-independent	No change
chr04:239106-239152;+	233.835	-0.92828	0.448729	4.70658	0.0300474	0.0465445	YDL132W	CDC53	IME4-independent	No change
chr04:240361-240412;+	215.799	-2.21443	0.68993	14.7604	0.000122069	0.000320225	YDL132W	CDC53	IME4-dependent	Binding Down
chr04:244116-244172;+	339.523	1.40066	0.431307	10.5942	0.00113444	0.00242048	YDL130W-A	STF1	IME4-independent	No change
chr04:246759-246850;+	339.98	-3.83367	0.389413	100.999	9.20139e-24	1.88979e-22	YDL129W	YDL129W	IME4-dependent	Binding Down
chr04:248523-248575;+	200.012	-2.75335	0.348232	71.7631	2.4265e-17	3.1548e-16	YDL128W	VCX1	IME4-dependent	Binding Down
chr04:250775-250891;-	1008.1	-0.791024	0.214035	14.0582	0.000177244	0.00044703	YDL126C	CDC48	IME4-independent	No change
chr04:251882-251916;-	652.808	1.46004	0.382702	15.0602	0.000104133	0.000276683	YDL126C	CDC48	IME4-independent	No change
chr04:251973-252010;-	663.171	1.25862	0.359234	12.4789	0.000411573	0.000965222	YDL126C	CDC48	IME4-independent	No change
chr04:252943-252968;-	654.634	0.142747	1.28478	0.0123538	0.911499	0.928624	YDL126C	CDC48	IME4-independent	No change
chr04:253064-253120;-	735.904	1.64553	0.286449	34.5201	4.2188e-09	2.31734e-08	YDL126C	CDC48	IME4-independent	No change
chr04:253508-253606;-	469.667	3.16865	0.253553	170.042	7.24353e-39	3.30342e-37	YDL125C	HNT1	IME4-independent	Binding Up
chr04:255545-255622;+	218.623	0.0157006	0.394252	0.00159004	0.968193	0.974549	YDL124W	YDL124W	IME4-independent	No change
chr04:255723-255812;+	287.188	-0.609519	0.381936	2.55375	0.110033	0.149188	YDL124W	YDL124W	IME4-independent	No change
chr04:256544-256593;+	229.592	0.841143	0.325595	6.84071	0.00891032	0.0156168	YDL123W	SNA4	IME4-independent	No change
chr04:256654-256715;+	236.249	0.752952	0.313555	5.87561	0.0153521	0.0254903	YDL123W	SNA4	IME4-independent	No change
chr04:278962-279031;-	700.648	1.37046	0.294301	21.5873	3.38078e-06	1.17949e-05	YDL110C	TMA17	IME4-independent	No change
chr04:279046-279112;-	671.523	1.51327	0.367613	16.834	4.07963e-05	0.000117869	YDL110C	TMA17	IME4-independent	No change
chr04:279288-279349;-	602.093	0.339051	0.237884	2.01708	0.155538	0.203352	YDL110C	TMA17	IME4-independent	No change
chr04:289904-289955;-	219.411	0.63168	0.459044	1.89234	0.168939	0.218718	YDL103C	QRI1	IME4-independent	No change
chr04:289996-290033;-	232.278	0.495686	0.408285	1.46826	0.22562	0.283076	YDL103C	QRI1	IME4-independent	No change
chr04:290051-290094;-	215.164	0.203369	0.472031	0.184833	0.667252	0.721532	YDL103C	QRI1	IME4-independent	No change
chr04:290347-290402;-	214.146	0.418387	0.486898	0.73421	0.391522	0.45723	YDL103C	QRI1	IME4-independent	No change
chr04:290928-291005;-	242.242	1.49664	0.410054	14.2268	0.000162049	0.000412213	YDL103C	QRI1	IME4-independent	No change
chr04:296800-296856;-	235.698	3.14706	0.556088	39.9378	2.62174e-10	1.6834e-09	YDL100C	GET3	IME4-independent	Binding Up
chr04:296922-297004;-	245.833	1.58906	0.423204	13.789	0.000204526	0.000508393	YDL100C	GET3	IME4-independent	No change
chr04:297030-297125;-	262.989	3.1297	0.449984	59.7495	1.07734e-14	1.10505e-13	YDL100C	GET3	IME4-independent	Binding Up
chr04:297254-297281;-	225.559	3.06393	0.632755	28.7267	8.33476e-08	3.75487e-07	YDL100C	GET3	IME4-independent	Binding Up
chr04:297568-297706;-	324.955	2.21493	0.292502	59.8833	1.00651e-14	1.03782e-13	YDL100C	GET3	IME4-independent	Binding Up
chr04:299942-300011;-	309.144	2.57796	0.341716	64.5661	9.33489e-16	1.07812e-14	YDL097C	RPN6	IME4-independent	Binding Up
chr04:300034-300097;-	291.395	2.14198	0.345236	40.6821	1.79123e-10	1.17821e-09	YDL097C	RPN6	IME4-independent	Binding Up
chr04:300153-300242;-	321.686	1.9064	0.292675	43.488	4.26564e-11	3.06169e-10	YDL097C	RPN6	IME4-independent	No change
chr04:300449-300503;-	264.871	1.6766	0.387829	18.6878	1.53965e-05	4.8023e-05	YDL097C	RPN6	IME4-independent	No change
chr04:301813-301850;+	319.05	1.61859	0.538579	9.96869	0.00159224	0.00329069	YDL095W	PMT1	IME4-independent	No change
chr04:302056-302173;+	395.835	0.111942	0.31902	0.123507	0.725261	0.773073	YDL095W	PMT1	IME4-independent	No change
chr04:302499-302545;+	325.057	1.22195	0.483297	6.71878	0.0095403	0.0165674	YDL095W	PMT1	IME4-independent	No change
chr04:303048-303098;+	324.87	1.9566	0.543858	15.049	0.000104755	0.000278084	YDL095W	PMT1	IME4-independent	No change
chr04:303655-303691;+	321.185	1.32348	0.511369	7.1182	0.00763053	0.0135419	YDL095W	PMT1	IME4-independent	No change
chr04:303829-303898;+	341.615	0.767424	0.408646	3.575	0.0586553	0.0852323	YDL095W	PMT1	IME4-independent	No change
chr04:304079-304156;+	406.218	0.274783	0.301964	0.826814	0.363195	0.42945	YDL095W	PMT1	IME4-independent	No change
chr04:305428-305581;+	288.849	0.238036	0.276669	0.74187	0.389062	0.454909	YDL093W	PMT5	IME4-independent	No change
chr04:306710-306805;+	307.514	-2.51837	0.311055	83.8727	5.27681e-20	8.37977e-19	YDL093W	PMT5	IME4-dependent	Binding Down
chr04:312922-313012;-	306.879	-3.67532	0.309038	219.256	1.3145e-49	9.42727e-48	YDL088C	ASM4	IME4-dependent	Binding Down
chr04:318173-318220;+	303.484	0.684518	0.393912	3.08587	0.0789749	0.111075	YDL085W	NDE2	IME4-independent	No change
chr04:318557-318641;+	342.182	1.32385	0.351391	15.2922	9.20942e-05	0.000248255	YDL085W	NDE2	IME4-independent	No change
chr04:319094-319131;+	314.26	0.915138	0.377524	6.10404	0.0134873	0.0227164	YDL085W	NDE2	IME4-independent	No change
chr04:319199-319235;+	323.016	0.213454	0.347513	0.37797	0.538692	0.601455	YDL085W	NDE2	IME4-independent	No change
chr04:319241-319285;+	354.182	1.28733	0.334679	15.8424	6.8842e-05	0.000190305	YDL085W	NDE2	IME4-independent	No change
chr04:319297-319348;+	387.585	1.13402	0.30054	14.9313	0.000111497	0.000294925	YDL085W	NDE2	IME4-independent	No change
chr04:319358-319418;+	423.653	0.800109	0.283196	8.10379	0.00441727	0.00826832	YDL085W	NDE2	IME4-independent	No change
chr04:321163-321218;+	276.572	0.0069928	0.394601	0.00031376	0.985868	0.98887	YDL084W	SUB2	IME4-independent	No change
chr04:324457-324542;-	234.758	-0.130932	0.345703	0.143421	0.704903	0.755798	YDL081C	RPP1A	IME4-independent	No change
chr04:324653-324726;-	202.146	-0.503083	0.384395	1.72254	0.189366	0.242063	YDL081C	RPP1A	IME4-independent	No change
chr04:329814-329912;-	588.009	1.0376	0.28416	13.3943	0.000252394	0.000617991	YDL078C	MDH3	IME4-independent	No change
chr04:330263-330338;-	526.195	1.29066	0.332405	15.3147	9.10039e-05	0.000245763	YDL078C	MDH3	IME4-independent	No change
chr04:337994-338044;-	264.919	0.757848	0.30483	6.22642	0.0125858	0.0213598	snR63	snR63	IME4-independent	No change
chr04:345821-345852;+	5416.6	-3.30449	0.223714	221.074	5.27505e-50	3.84516e-48	YDL070W	BDF2	IME4-dependent	Binding Down
chr04:346491-346555;+	6360.92	-4.84372	0.243658	459.74	5.4771e-102	2.43539e-99	YDL070W	BDF2	IME4-dependent	Binding Down
chr04:347424-347534;+	11614	-3.40707	0.145764	556.13	5.84048e-123	5.19394e-120	YDL070W	BDF2	IME4-dependent	Binding Down
chr04:348558-348638;-	966.6	1.15196	0.157794	52.9107	3.49059e-13	3.13554e-12	YDL067C	COX9	IME4-independent	No change
chr04:348656-348727;-	938.755	1.35241	0.172897	61.315	4.86362e-15	5.1799e-14	YDL067C	COX9	IME4-independent	No change
chr04:350121-350166;+	205.936	0.0167729	0.323727	0.00268624	0.958665	0.966819	YDL066W	IDP1	IME4-independent	No change
chr04:365637-365695;+	235.404	-4.71342	0.523303	154.731	1.60318e-35	6.17189e-34	YDL058W	USO1	IME4-dependent	Binding Down
chr04:370115-370153;-	237.304	-2.1376	0.50282	19.5626	9.73585e-06	3.13926e-05	YDL055C	PSA1	IME4-dependent	Binding Down
chr04:370230-370294;-	300.246	-2.61824	0.430096	40.9929	1.52782e-10	1.0208e-09	YDL055C	PSA1	IME4-dependent	Binding Down
chr04:374495-374532;-	793.877	2.3648	0.389575	37.3897	9.67299e-10	5.78104e-09	YDL054C	MCH1	IME4-independent	Binding Up
chr04:374609-374643;-	785.832	2.31246	0.406101	32.5844	1.14124e-08	5.81609e-08	YDL054C	MCH1	IME4-independent	Binding Up
chr04:375440-375488;-	775.415	2.99473	0.494129	40.2723	2.20915e-10	1.43506e-09	YDL054C	MCH1	IME4-independent	Binding Up
chr04:375731-375791;-	789.734	1.91329	0.409484	21.4607	3.61159e-06	1.25265e-05	YDL054C	MCH1	IME4-independent	No change
chr04:376189-376333;-	289.141	1.47908	0.275471	29.3067	6.1783e-08	2.83507e-07	YDL053C	PBP4	IME4-independent	No change
chr04:376685-376739;-	209.01	1.46168	0.336346	19.2243	1.16223e-05	3.70455e-05	YDL053C	PBP4	IME4-independent	No change
chr04:376841-376914;-	245.958	1.00027	0.299027	11.1502	0.00084024	0.00184409	YDL053C	PBP4	IME4-independent	No change
chr04:379602-379676;-	311.023	-4.43231	0.307877	299.219	4.87527e-67	6.77433e-65	YDL049C	YDL049C	IME4-dependent	Binding Down
chr04:385284-385388;+	975.079	-2.27151	0.208631	123.526	1.06963e-28	2.89998e-27	YDL047W	SIT4	IME4-dependent	Binding Down
chr04:385781-385818;+	720.656	2.52446	0.253578	114.628	9.49406e-27	2.35183e-25	YDL046W	NPC2	IME4-independent	Binding Up
chr04:386284-386374;+	1107.36	1.98998	0.293366	45.7888	1.31715e-11	1.00458e-10	YDL046W	NPC2	IME4-independent	No change
chr04:386420-386485;+	984.033	1.84722	0.228149	66.2293	4.01391e-16	4.76578e-15	YDL046W	NPC2	IME4-independent	No change
chr04:402715-402884;-	383.418	-1.77327	0.224199	67.4716	2.13743e-16	2.61101e-15	YDL035C	GPR1	IME4-independent	No change
chr04:405831-405971;-	205.877	0.544929	0.310198	3.17301	0.0748645	0.105879	YDL035C	GPR1	IME4-independent	No change
chr04:417271-417328;-	252.782	-1.563	0.268385	35.8249	2.15875e-09	1.23617e-08	YDL027C	YDL027C	IME4-independent	No change
chr04:419178-419273;-	391.25	-4.69974	0.387707	226.77	3.01838e-51	2.29423e-49	YDL025C	RTK1	IME4-dependent	Binding Down
chr04:425432-425461;+	285.682	1.21657	0.354517	12.3495	0.000441101	0.0010277	YDL022W	GPD1	IME4-independent	No change
chr04:425575-425607;+	252.611	1.11578	0.392918	8.45184	0.00364674	0.0069474	YDL022W	GPD1	IME4-independent	No change
chr04:426076-426117;+	287.285	-0.902497	1.27276	0.50165	0.478776	0.543914	YDL022W	GPD1	IME4-independent	No change
chr04:426661-426828;+	860.032	0.972382	0.236289	17.0091	3.72008e-05	0.000108113	YDL022W	GPD1	IME4-independent	No change
chr04:428664-428729;-	338.5	1.50629	0.343145	20.0444	7.56664e-06	2.48303e-05	YDL020C	RPN4	IME4-independent	No change
chr04:428745-428794;-	290.65	1.4819	0.436778	12.0173	0.000527085	0.00120777	YDL020C	RPN4	IME4-independent	No change
chr04:430144-430195;-	445.126	1.99324	0.280176	54.2156	1.79652e-13	1.65731e-12	YDL020C	RPN4	IME4-independent	No change
chr04:430461-430504;-	305.356	1.61762	0.409285	16.4713	4.93911e-05	0.000140331	YDL020C	RPN4	IME4-independent	No change
chr04:431194-431346;-	346.252	-0.707596	0.327951	4.64013	0.0312327	0.0481623	YDL019C	OSH2	IME4-independent	No change
chr04:446122-446188;+	577.18	-2.41019	0.405129	36.9637	1.20346e-09	7.08768e-09	YDL010W	GRX6	IME4-dependent	Binding Down
chr04:452653-452743;+	403.732	1.23483	0.397059	9.45433	0.00210651	0.00424404	YDL007W	RPT2	IME4-independent	No change
chr04:452812-452892;+	405.211	1.94546	0.385734	25.5063	4.4095e-07	1.78001e-06	YDL007W	RPT2	IME4-independent	No change
chr04:456537-456580;+	305.237	2.25077	0.488984	22.2606	2.38036e-06	8.54259e-06	YDL004W	ATP16	IME4-independent	Binding Up
chr04:456764-456804;+	309.147	2.73502	0.50024	34.1159	5.19259e-09	2.80886e-08	YDL004W	ATP16	IME4-independent	Binding Up
chr04:456980-457053;+	388.036	2.31819	0.297604	64.3322	1.05112e-15	1.20459e-14	YDL004W	ATP16	IME4-independent	Binding Up
chr04:459919-459983;+	359.975	-7.19996	0.411292	659.354	2.06476e-145	3.06032e-142	YDL003W	MCD1	IME4-dependent	Binding Down
chr04:463676-463701;-	295.7	1.10474	0.383536	8.52248	0.00350787	0.00670727	YDR001C	NTH1	IME4-independent	No change
chr04:463743-463836;-	426.026	1.21701	0.247001	25.009	5.70648e-07	2.26048e-06	YDR001C	NTH1	IME4-independent	No change
chr04:463989-464125;-	436.762	1.30885	0.240219	30.8496	2.78822e-08	1.34759e-07	YDR001C	NTH1	IME4-independent	No change
chr04:464143-464178;-	306.363	1.47066	0.374066	16.4675	4.94899e-05	0.000140567	YDR001C	NTH1	IME4-independent	No change
chr04:464645-464796;-	434.717	1.56845	0.246175	43.318	4.65292e-11	3.31824e-10	YDR001C	NTH1	IME4-independent	No change
chr04:465023-465068;-	323.08	1.35379	0.336844	16.9688	3.8e-05	0.000110328	YDR001C	NTH1	IME4-independent	No change
chr04:465199-465276;-	388.908	1.93813	0.287642	51.0459	9.02324e-13	7.73806e-12	YDR001C	NTH1	IME4-independent	No change
chr04:465565-465595;-	278.037	1.23559	0.440472	8.18752	0.00421797	0.00792361	YDR001C	NTH1	IME4-independent	No change
chr04:465608-465631;-	282.988	1.7628	0.453212	16.819	4.11185e-05	0.000118723	YDR001C	NTH1	IME4-independent	No change
chr04:465638-465668;-	294.112	1.10182	0.38443	8.43912	0.00367233	0.00699316	YDR001C	NTH1	IME4-independent	No change
chr04:465948-465990;-	324.263	1.99711	0.370547	33.3054	7.87655e-09	4.13008e-08	YDR001C	NTH1	IME4-independent	No change
chr04:466017-466095;-	475.722	0.700763	0.221431	10.0437	0.00152868	0.00317555	YDR001C	NTH1	IME4-independent	No change
chr04:467212-467243;+	517.405	3.15237	0.227248	208.592	2.78711e-47	1.79607e-45	YDR002W	YRB1	IME4-independent	Binding Up
chr04:467841-467867;+	1033.92	2.18904	0.230306	90.8208	1.57289e-21	2.80877e-20	YDR003W	RCR2	IME4-independent	Binding Up
chr04:469980-470028;+	211.506	-4.4127	0.617937	111.413	4.80431e-26	1.13028e-24	YDR004W	RAD57	IME4-dependent	Binding Down
chr04:470624-470862;-	259.499	-0.126339	0.311243	0.165554	0.684093	0.736608	YDR005C	MAF1	IME4-independent	No change
chr04:472055-472139;-	202.283	-0.0379121	0.312088	0.0147565	0.903314	0.922292	YDR006C	SOK1	IME4-independent	No change
chr04:483985-484013;+	908.574	-1.2725	0.353606	12.8634	0.000335077	0.000800602	YDR011W	SNQ2	IME4-independent	No change
chr04:491904-491934;+	470.925	-0.437037	1.15343	0.143129	0.70519	0.755846	YDR014W-A	HED1	IME4-independent	No change
chr04:496127-496168;-	409.848	1.3502	0.309817	18.9034	1.37504e-05	4.32859e-05	YDR018C	YDR018C	IME4-independent	No change
chr04:496552-496600;-	439.697	1.46843	0.280904	27.4036	1.65121e-07	7.10413e-07	YDR018C	YDR018C	IME4-independent	No change
chr04:496631-496657;-	394.153	-0.419026	0.366426	1.35557	0.244306	0.30348	YDR018C	YDR018C	IME4-independent	No change
chr04:496876-496901;-	356.062	0.68642	0.411343	2.71169	0.0996154	0.136541	YDR018C	YDR018C	IME4-independent	No change
chr04:497517-497568;-	309.456	-1.70932	0.480706	15.8993	6.68045e-05	0.000185133	YDR019C	GCV1	IME4-independent	No change
chr04:497578-497621;-	321.475	-2.52666	0.542117	33.1556	8.50692e-09	4.42927e-08	YDR019C	GCV1	IME4-dependent	Binding Down
chr04:511072-511166;-	347.95	-0.328943	0.248168	1.76228	0.184341	0.236387	YDR028C	REG1	IME4-independent	No change
chr04:511214-511315;-	319.93	-0.632962	0.270257	5.57275	0.0182421	0.0297283	YDR028C	REG1	IME4-independent	No change
chr04:511388-511418;-	223.16	-0.754824	0.485653	2.47759	0.115479	0.155505	YDR028C	REG1	IME4-independent	No change
chr04:511556-511634;-	271.341	-0.531923	0.333212	2.57504	0.108561	0.147463	YDR028C	REG1	IME4-independent	No change
chr04:511975-512005;-	224.176	-1.08082	0.499629	4.9459	0.0261526	0.0411273	YDR028C	REG1	IME4-independent	No change
chr04:512015-512059;-	242.746	-0.301057	0.404827	0.554122	0.456638	0.522233	YDR028C	REG1	IME4-independent	No change
chr04:512722-512858;-	343.281	-1.54744	0.276827	34.6483	3.9498e-09	2.17496e-08	YDR028C	REG1	IME4-independent	No change
chr04:513027-513079;-	249.917	0.751167	0.40847	3.51495	0.0608176	0.0880148	YDR028C	REG1	IME4-independent	No change
chr04:513097-513123;-	221.714	0.226287	0.520039	0.190291	0.662674	0.717279	YDR028C	REG1	IME4-independent	No change
chr04:513947-514039;-	271.908	0.834554	0.356565	5.73512	0.0166289	0.02736	YDR028C	REG1	IME4-independent	No change
chr04:517379-517455;+	302.697	-3.13042	0.321983	112.546	2.71261e-26	6.53747e-25	YDR031W	MIC14	IME4-dependent	Binding Down
chr04:517519-517606;-	584.202	-0.521176	0.333385	2.44246	0.118091	0.15859	YDR032C	PST2	IME4-independent	No change
chr04:517737-517829;-	552.855	0.798551	0.325267	6.07105	0.0137415	0.0231052	YDR032C	PST2	IME4-independent	No change
chr04:521584-521626;+	349.791	0.326026	0.363963	0.80669	0.369101	0.435045	YDR033W	MRH1	IME4-independent	No change
chr04:522021-522053;+	295.25	2.05338	0.574792	15.2527	9.40422e-05	0.00025297	YDR033W	MRH1	IME4-independent	Binding Up
chr04:522399-522479;+	377.411	0.465171	0.692739	0.45255	0.501126	0.566194	YDR033W	MRH1	IME4-independent	No change
chr04:522749-522820;+	409.539	-0.591338	0.313514	3.58711	0.0582293	0.0846547	YDR033W	MRH1	IME4-independent	No change
chr04:522852-522963;+	464.667	-0.087123	0.383048	0.0520121	0.819598	0.851582	YDR033W	MRH1	IME4-independent	No change
chr04:522972-522997;+	311.639	0.485021	0.41954	1.34816	0.2456	0.304874	YDR033W	MRH1	IME4-independent	No change
chr04:528334-528417;+	407.271	2.21196	0.263254	74.6476	5.62707e-18	7.69869e-17	YDR034W-B	YDR034W-B	IME4-independent	Binding Up
chr04:534373-534433;-	687.209	-1.71692	0.342754	25.015	5.68866e-07	2.25442e-06	YDR040C	ENA1	IME4-independent	No change
chr04:534502-534533;-	270.134	0.208148	0.266213	0.613274	0.433558	0.499369	YDR040C	ENA1	IME4-independent	No change
chr04:534643-534727;-	571.704	0.847272	0.197683	18.6888	1.53885e-05	4.80174e-05	YDR040C	ENA1	IME4-independent	No change
chr04:534770-534801;-	350.658	1.14398	0.245407	22.9588	1.65508e-06	6.09972e-06	YDR040C	ENA1	IME4-independent	No change
chr04:535021-535097;-	400.906	0.392342	0.211258	3.46699	0.0626052	0.0904105	YDR040C	ENA1	IME4-independent	No change
chr04:540946-541012;-	868.596	0.654557	0.411156	2.53085	0.11164	0.150965	snR47	snR47	IME4-independent	No change
chr04:546585-546659;+	224.396	0.584439	0.258564	5.03187	0.024885	0.0393007	YDR044W	HEM13	IME4-independent	No change
chr04:546797-546903;+	440.003	-0.680577	0.204921	11.4512	0.000714493	0.00159009	YDR044W	HEM13	IME4-independent	No change
chr04:554831-554880;-	568.049	0.161919	0.751231	0.0465481	0.829183	0.859581	YDR050C	TPI1	IME4-independent	No change
chr04:554899-555033;-	1012.55	-0.206884	0.88995	0.0540646	0.816136	0.848678	YDR050C	TPI1	IME4-independent	No change
chr04:555141-555170;-	461.226	0.151674	1.09753	0.0191398	0.889966	0.911071	YDR050C	TPI1	IME4-independent	No change
chr04:555306-555354;-	549.63	0.192184	1.01718	0.0357459	0.850041	0.8767	YDR050C	TPI1	IME4-independent	No change
chr04:557449-557649;-	366.087	0.582032	0.241346	5.80677	0.0159646	0.0263743	YDR052C	DBF4	IME4-independent	No change
chr04:557674-557797;-	257.743	0.656596	0.372917	3.10361	0.0781188	0.110027	YDR052C	DBF4	IME4-independent	No change
chr04:560194-560238;-	375.608	1.48172	0.28306	28.87	7.74024e-08	3.50478e-07	YDR054C	CDC34	IME4-independent	No change
chr04:560318-560351;-	350.019	0.262612	0.290287	0.811831	0.367579	0.433597	YDR054C	CDC34	IME4-independent	No change
chr04:560381-560446;-	345.464	0.958396	0.304028	10.0069	0.00155959	0.00323221	YDR054C	CDC34	IME4-independent	No change
chr04:560511-560546;-	298.214	0.99095	0.396579	6.30331	0.0120513	0.0205507	YDR054C	CDC34	IME4-independent	No change
chr04:562691-562807;+	530.212	-0.163486	0.354477	0.212595	0.644741	0.700854	YDR055W	PST1	IME4-independent	No change
chr04:563089-563157;+	402.752	-0.314411	0.39016	0.644943	0.421927	0.487995	YDR055W	PST1	IME4-independent	No change
chr04:564043-564083;+	373.718	-1.55223	0.411081	14.1882	0.000165404	0.000420221	YDR055W	PST1	IME4-independent	No change
chr04:564092-564140;+	455.165	-2.33435	0.373921	39.1323	3.96035e-10	2.48374e-09	YDR055W	PST1	IME4-dependent	Binding Down
chr04:568487-568532;-	541.591	2.06271	0.321354	41.5677	1.13862e-10	7.74136e-10	YDR059C	UBC5	IME4-independent	Binding Up
chr04:568562-568587;-	464.415	2.23108	0.384457	34.2968	4.73158e-09	2.57673e-08	YDR059C	UBC5	IME4-independent	Binding Up
chr04:576053-576093;+	257.513	0.849899	0.380925	5.06067	0.0244748	0.0387561	YDR062W	LCB2	IME4-independent	No change
chr04:577337-577390;+	303.493	-1.01545	0.321744	10.7529	0.00104118	0.00223707	YDR062W	LCB2	IME4-independent	No change
chr04:577477-577587;+	447.107	1.24895	0.219596	33.7021	6.42312e-09	3.42041e-08	YDR062W	LCB2	IME4-independent	No change
chr04:583965-583994;-	693.532	-5.3818	0.422878	180.653	3.49094e-41	1.72472e-39	YDR069C	DOA4	IME4-dependent	Binding Down
chr04:587153-587253;-	848.484	0.13857	0.258466	0.288	0.591505	0.65288	YDR070C	FMP16	IME4-independent	No change
chr04:595787-595833;+	1323.86	-3.02615	0.247726	147.128	7.35662e-34	2.58587e-32	YDR074W	TPS2	IME4-dependent	Binding Down
chr04:595839-595868;+	401.623	-3.14888	0.244478	203.63	3.3703e-46	2.08139e-44	YDR074W	TPS2	IME4-dependent	Binding Down
chr04:595904-595945;+	690.584	-2.74362	0.186076	236.38	2.42165e-53	1.9578e-51	YDR074W	TPS2	IME4-dependent	Binding Down
chr04:597191-597242;+	378.536	-5.18118	0.411814	341.918	2.43861e-76	4.51804e-74	YDR075W	PPH3	IME4-dependent	Binding Down
chr04:599982-600052;+	6522.96	0.922821	0.416142	4.89854	0.0268794	0.0421402	YDR077W	SED1	IME4-independent	No change
chr04:600964-601046;+	8653.37	0.704413	0.260449	7.29944	0.00689762	0.012392	YDR077W	SED1	IME4-independent	No change
chr04:602548-602605;+	674.503	0.98777	0.221658	19.8388	8.42569e-06	2.74468e-05	YDR079W	PET100	IME4-independent	No change
chr04:606423-606507;-	240.248	-3.79373	0.358687	160.404	9.2361e-37	3.73349e-35	YDR081C	PDC2	IME4-dependent	Binding Down
chr04:613346-613408;-	214.775	2.19221	0.360205	41.8448	9.88126e-11	6.76475e-10	YDR085C	AFR1	IME4-independent	Binding Up
chr04:615870-615970;-	259.549	0.978629	0.262287	14.1665	0.000167319	0.000424648	YDR086C	SSS1	IME4-independent	No change
chr04:616020-616113;-	242.693	0.372401	0.268915	1.91004	0.166958	0.216501	YDR086C	SSS1	IME4-independent	No change
chr04:616254-616360;-	322.933	1.2894	0.234802	31.3349	2.17136e-08	1.0645e-07	YDR086C	SSS1	IME4-independent	No change
chr04:623822-623936;-	587.941	-2.33727	0.2634	83.2429	7.25657e-20	1.14217e-18	YDR090C	YDR090C	IME4-dependent	Binding Down
chr04:623941-623980;-	293.668	-1.41708	0.282307	26.9156	2.12532e-07	9.00453e-07	YDR090C	YDR090C	IME4-independent	No change
chr04:624014-624050;-	243.937	-0.82317	0.305898	7.41564	0.00646592	0.0117182	YDR090C	YDR090C	IME4-independent	No change
chr04:635974-636039;+	201.435	0.886443	0.429479	4.31268	0.0378294	0.057321	YDR096W	GIS1	IME4-independent	No change
chr04:637483-637560;+	203.2	1.46784	0.447415	11.313	0.00076965	0.0017005	YDR096W	GIS1	IME4-independent	No change
chr04:637944-638112;+	296.391	0.733296	0.326964	5.03103	0.0248971	0.0393128	YDR096W	GIS1	IME4-independent	No change
chr04:638294-638343;+	231.838	-0.0559937	0.373324	0.0225252	0.880698	0.902934	YDR096W	GIS1	IME4-independent	No change
chr04:638372-638425;+	242.432	-1.43463	0.406283	13.598	0.000226424	0.000558091	YDR096W	GIS1	IME4-independent	No change
chr04:638545-638616;+	265.446	-0.955794	0.373963	6.72537	0.00950511	0.016521	YDR096W	GIS1	IME4-independent	No change
chr04:638627-638668;+	209.625	-0.124913	0.420051	0.0884767	0.766123	0.807166	YDR096W	GIS1	IME4-independent	No change
chr04:638751-638805;+	214.225	0.575843	0.396799	2.10964	0.146374	0.192503	YDR096W	GIS1	IME4-independent	No change
chr04:638807-638916;+	313.486	0.348794	0.320953	1.1771	0.277947	0.339391	YDR096W	GIS1	IME4-independent	No change
chr04:639015-639175;-	288.376	-3.92009	0.325382	191.538	1.46777e-43	8.10739e-42	YDR097C	MSH6	IME4-dependent	Binding Down
chr04:639473-639546;-	226.122	-4.17094	0.405144	153.519	2.94969e-35	1.11624e-33	YDR097C	MSH6	IME4-dependent	Binding Down
chr04:646485-646519;+	1351.66	0.069979	0.45121	0.0241744	0.876442	0.899815	YDR099W	BMH2	IME4-independent	No change
chr04:647514-647549;+	1812.81	-0.663964	0.453611	2.13808	0.143681	0.189466	YDR099W	BMH2	IME4-independent	No change
chr04:647578-647617;+	1658.2	0.0750284	0.273957	0.0749216	0.784301	0.822305	YDR099W	BMH2	IME4-independent	No change
chr04:670437-670473;+	387.93	0.910714	0.335411	7.3635	0.0066561	0.0120213	YDR110W	FOB1	IME4-independent	No change
chr04:670703-670729;-	261.226	1.66501	0.351568	21.8127	3.00604e-06	1.05621e-05	YDR111C	ALT2	IME4-independent	No change
chr04:670782-670814;-	265.17	2.11961	0.356129	36.049	1.92414e-09	1.10969e-08	YDR111C	ALT2	IME4-independent	Binding Up
chr04:670821-670854;-	298.164	1.90838	0.29867	40.5927	1.87502e-10	1.22969e-09	YDR111C	ALT2	IME4-independent	No change
chr04:670941-670981;-	246.059	-0.215497	0.445008	0.240483	0.623858	0.681652	YDR111C	ALT2	IME4-independent	No change
chr04:671151-671196;-	285.445	-1.39044	0.448445	12.058	0.000515719	0.00118509	YDR111C	ALT2	IME4-independent	No change
chr04:683626-683726;+	3385.78	0.323319	0.303753	1.13279	0.287182	0.349085	YDR119W-A	COX26	IME4-independent	No change
chr04:684049-684083;+	2731.68	0.998546	0.316213	9.93178	0.00162449	0.00334955	YDR119W-A	COX26	IME4-independent	No change
chr04:690573-690684;+	328.869	-0.618437	0.255463	5.89775	0.0151602	0.0252141	YDR122W	KIN1	IME4-independent	No change
chr04:705939-705980;-	270.373	-1.18035	0.336798	12.8813	0.000331877	0.000794667	YDR129C	SAC6	IME4-independent	No change
chr04:705994-706042;-	308.752	-1.92103	0.330284	38.1044	6.70573e-10	4.07281e-09	YDR129C	SAC6	IME4-independent	No change
chr04:713589-713619;-	2747.24	3.70394	0.420109	75.2039	4.24517e-18	5.8388e-17	YDR133C	YDR133C	IME4-independent	Binding Up
chr04:734602-734729;-	204.444	-1.31304	0.275165	24.5532	7.22851e-07	2.81944e-06	YDR143C	SAN1	IME4-independent	No change
chr04:746217-746307;-	971.448	1.27027	0.203115	38.462	5.58302e-10	3.41705e-09	YDR148C	KGD2	IME4-independent	No change
chr04:746314-746343;-	799.34	1.98865	0.335867	36.3175	1.6765e-09	9.7191e-09	YDR148C	KGD2	IME4-independent	No change
chr04:746524-746565;-	832.325	1.69819	0.295852	33.3369	7.75e-09	4.07093e-08	YDR148C	KGD2	IME4-independent	No change
chr04:746720-746763;-	827.026	2.07165	0.292449	52.6384	4.00963e-13	3.56576e-12	YDR148C	KGD2	IME4-independent	Binding Up
chr04:747411-747437;-	773.29	2.03648	0.373744	31.0308	2.53969e-08	1.23365e-07	YDR148C	KGD2	IME4-independent	Binding Up
chr04:747480-747525;-	792.221	2.50544	0.362329	53.5663	2.5001e-13	2.28269e-12	YDR148C	KGD2	IME4-independent	Binding Up
chr04:747708-747745;-	792.661	1.58152	0.325704	23.5519	1.2159e-06	4.5818e-06	YDR148C	KGD2	IME4-independent	No change
chr04:747751-747804;-	842.268	1.56283	0.278295	31.3928	2.10766e-08	1.03727e-07	YDR148C	KGD2	IME4-independent	No change
chr04:753036-753099;+	275.426	-2.57107	0.613901	23.8098	1.06342e-06	4.04489e-06	YDR150W	NUM1	IME4-dependent	Binding Down
chr04:755905-755932;+	266.427	0.374412	0.514631	0.532038	0.465751	0.531425	YDR150W	NUM1	IME4-independent	No change
chr04:755950-756001;+	356.337	-1.23947	0.435315	8.24435	0.00408789	0.00769715	YDR150W	NUM1	IME4-independent	No change
chr04:756018-756050;+	269.805	-0.36739	0.48479	0.579634	0.446456	0.512235	YDR150W	NUM1	IME4-independent	No change
chr04:756074-756136;+	292.301	-0.0966562	0.411926	0.055102	0.814412	0.847578	YDR150W	NUM1	IME4-independent	No change
chr04:756441-756573;+	527.008	-2.25786	0.291139	66.3476	3.78024e-16	4.50639e-15	YDR150W	NUM1	IME4-dependent	Binding Down
chr04:784264-784387;+	293.416	-0.397694	0.378743	1.13662	0.286367	0.34819	YDR168W	CDC37	IME4-independent	No change
chr04:784470-784507;+	257.383	1.99984	0.529298	15.8298	6.93008e-05	0.000191276	YDR168W	CDC37	IME4-independent	No change
chr04:784677-784704;-	234.946	-0.91802	0.34934	7.33473	0.0067635	0.0121831	YDR169C	STB3	IME4-independent	No change
chr04:784710-784785;-	313.8	-0.062206	0.268496	0.053594	0.816923	0.849367	YDR169C	STB3	IME4-independent	No change
chr04:788630-788772;-	275.616	-0.65629	0.326365	4.07542	0.0435113	0.0650549	YDR170C	SEC7	IME4-independent	No change
chr04:788914-789043;-	255.108	-0.542299	0.348159	2.44046	0.118242	0.158768	YDR170C	SEC7	IME4-independent	No change
chr04:792871-792964;-	267.828	-1.43924	0.364951	16.3594	5.2395e-05	0.000148155	YDR170C	SEC7	IME4-independent	No change
chr04:794057-794181;-	408.918	-5.17847	0.546436	192.42	9.42371e-44	5.23782e-42	YDR170C	SEC7	IME4-dependent	Binding Down
chr04:797392-797456;+	235.682	0.971635	0.440066	4.93797	0.0262728	0.0412945	YDR171W	HSP42	IME4-independent	No change
chr04:798019-798186;+	333.486	1.40259	0.343298	17.0759	3.59159e-05	0.000104618	YDR171W	HSP42	IME4-independent	No change
chr04:798510-798592;+	322.974	0.37397	0.640108	0.340623	0.55947	0.621222	YDR171W	HSP42	IME4-independent	No change
chr04:801254-801313;+	253.076	0.992443	0.287686	11.8199	0.000586014	0.00133046	YDR172W	SUP35	IME4-independent	No change
chr04:808816-808843;+	2059.24	2.8497	0.274627	107.534	3.39956e-25	7.59606e-24	YDR178W	SDH4	IME4-independent	Binding Up
chr04:809266-809383;+	2172.99	3.15737	0.272564	133.272	7.88496e-31	2.4014e-29	YDR178W	SDH4	IME4-independent	Binding Up
chr04:812755-812789;+	612.653	-1.56597	0.377898	19.3522	1.08696e-05	3.48336e-05	YDR180W	SCC2	IME4-independent	No change
chr04:812918-812958;+	480.33	1.50066	0.424459	12.2996	0.000453052	0.00105058	YDR180W	SCC2	IME4-independent	No change
chr04:813061-813091;+	568.666	1.89717	0.52303	13.0164	0.00030877	0.000743741	YDR180W	SCC2	IME4-independent	No change
chr04:815239-815310;+	515.383	1.91323	0.420337	20.7298	5.28852e-06	1.78214e-05	YDR180W	SCC2	IME4-independent	No change
chr04:819178-819272;+	221.815	-2.15993	0.337503	47.0084	7.06847e-12	5.553e-11	YDR182W	CDC1	IME4-dependent	Binding Down
chr04:823552-823609;-	229.146	-0.57813	0.369631	2.53185	0.111569	0.150903	YDR186C	YDR186C	IME4-independent	No change
chr04:823799-823899;-	349.958	-0.401609	0.23706	2.91772	0.0876115	0.121644	YDR186C	YDR186C	IME4-independent	No change
chr04:823914-823938;-	204.581	-1.19337	0.486719	6.72018	0.0095328	0.0165576	YDR186C	YDR186C	IME4-independent	No change
chr04:828877-828925;+	264.957	-0.758508	0.311682	6.05201	0.0138905	0.0233173	YDR188W	CCT6	IME4-independent	No change
chr04:828930-828970;+	355.314	-0.409577	0.261435	2.46401	0.116481	0.156641	YDR188W	CCT6	IME4-independent	No change
chr04:831176-831277;+	215.805	-3.3323	0.360609	119.388	8.61154e-28	2.22623e-26	YDR189W	SLY1	IME4-dependent	Binding Down
chr04:831390-831505;-	253.716	-2.80787	0.328203	86.8777	1.15441e-20	1.94436e-19	YDR190C	RVB1	IME4-dependent	Binding Down
chr04:836642-836711;-	364.809	0.684883	0.212214	10.3115	0.00132202	0.00278662	YDR194C	MSS116	IME4-independent	No change
chr04:849817-849863;+	230.88	-2.85377	0.425846	57.0475	4.25403e-14	4.14361e-13	YDR204W	COQ4	IME4-dependent	Binding Down
chr04:855619-855719;-	1176.42	-2.23058	0.208718	117.4	2.34616e-27	5.94426e-26	YDR207C	UME6	IME4-dependent	Binding Down
chr04:856630-856682;-	445.214	1.22538	0.326842	14.1021	0.000173152	0.000437703	YDR207C	UME6	IME4-independent	No change
chr04:860377-860451;+	204.689	1.29685	0.342987	14.4123	0.000146841	0.000377744	YDR208W	MSS4	IME4-independent	No change
chr04:861318-861419;+	385.287	-0.0155947	0.238413	0.0042944	0.947751	0.957984	YDR208W	MSS4	IME4-independent	No change
chr04:876704-876754;+	870.047	-2.72	0.368918	58.6488	1.88481e-14	1.89183e-13	YDR216W	ADR1	IME4-dependent	Binding Down
chr04:878202-878267;+	1089.4	-0.778173	0.321983	5.82886	0.0157653	0.0260984	YDR216W	ADR1	IME4-independent	No change
chr04:878475-878601;-	461.708	-4.22786	0.248952	388.525	1.73405e-86	4.40598e-84	YDR217C	RAD9	IME4-dependent	Binding Down
chr04:884224-884438;-	250.833	0.481436	0.254841	3.54057	0.0598849	0.0868823	YDR219C	MFB1	IME4-independent	No change
chr04:893164-893376;-	2037.69	1.2395	0.524165	5.55037	0.0184768	0.0300832	YDR224C	HTB1	IME4-independent	No change
chr04:894717-894753;+	1549.13	-0.459242	0.576692	0.633638	0.426024	0.492158	YDR225W	HTA1	IME4-independent	No change
chr04:894878-894916;+	1715.58	1.40992	0.404727	12.0327	0.000522755	0.00119971	YDR225W	HTA1	IME4-independent	No change
chr04:896165-896211;+	229.565	0.537916	0.260161	4.26775	0.0388424	0.0587059	YDR226W	ADK1	IME4-independent	No change
chr04:900672-900794;+	392.723	-3.01439	0.356568	82.6096	9.99693e-20	1.54883e-18	YDR227W	SIR4	IME4-dependent	Binding Down
chr04:906181-906280;+	454.433	0.720654	0.344255	4.38717	0.0362105	0.0551309	YDR232W	HEM1	IME4-independent	No change
chr04:906952-907023;+	212.261	1.08707	0.398951	7.62708	0.00574985	0.0105473	YDR232W	HEM1	IME4-independent	No change
chr04:907921-908015;+	313.34	-0.981764	0.403233	5.96505	0.0145922	0.0243971	YDR232W	HEM1	IME4-independent	No change
chr04:908038-908136;+	345.174	-0.908108	0.330905	7.57731	0.00591076	0.0108113	YDR232W	HEM1	IME4-independent	No change
chr04:908149-908239;+	295.509	-0.583224	0.333572	3.07236	0.0796338	0.111877	YDR232W	HEM1	IME4-independent	No change
chr04:916767-916908;-	366.723	-0.207164	0.328079	0.400732	0.526712	0.590525	YDR238C	SEC26	IME4-independent	No change
chr04:917097-917294;-	369.581	-0.00698684	0.324633	0.000463159	0.98283	0.986713	YDR238C	SEC26	IME4-independent	No change
chr04:933062-933085;+	728.193	1.60912	0.20886	59.7765	1.06262e-14	1.09247e-13	YDR246W	TRS23	IME4-independent	No change
chr04:936045-936173;+	409.975	0.560068	0.333118	2.81184	0.0935712	0.129032	YDR247W	VHS1	IME4-independent	No change
chr04:941788-941848;+	205.01	-0.869632	0.354108	6.19041	0.0128445	0.0217531	YDR251W	PAM1	IME4-independent	No change
chr04:944838-944915;-	415.208	0.154954	0.245625	0.398464	0.527884	0.59165	YDR255C	YDR255C	IME4-independent	No change
chr04:944962-945007;-	453.6	-0.150634	0.228791	0.433945	0.51006	0.57541	YDR255C	YDR255C	IME4-independent	No change
chr04:945025-945076;-	424.601	-0.294885	0.241233	1.50268	0.220259	0.277083	YDR255C	YDR255C	IME4-independent	No change
chr04:945084-945113;-	343.753	0.713842	0.320476	5.07109	0.0243281	0.0385582	YDR255C	YDR255C	IME4-independent	No change
chr04:945161-945194;-	304.071	-0.0502171	0.391864	0.0164271	0.898016	0.917937	YDR255C	YDR255C	IME4-independent	No change
chr04:946757-946899;-	1855.38	-1.11233	0.20882	28.3527	1.01108e-07	4.48456e-07	YDR256C	CTA1	IME4-independent	No change
chr04:946925-946955;-	902.198	-1.03232	0.261326	16.006	6.31419e-05	0.00017575	YDR256C	CTA1	IME4-independent	No change
chr04:947732-947760;-	838.98	1.36019	0.324506	18.2202	1.96781e-05	6.02192e-05	YDR256C	CTA1	IME4-independent	No change
chr04:969028-969142;+	270.192	-0.311929	0.289237	1.16565	0.280297	0.341791	YDR262W	YDR262W	IME4-independent	No change
chr04:970901-970953;-	357.306	-3.67313	0.387709	128.039	1.10085e-29	3.13779e-28	YDR264C	AKR1	IME4-dependent	Binding Down
chr04:987222-987279;+	560.777	2.02057	0.253943	66.9419	2.79624e-16	3.3604e-15	YDR275W	BSC2	IME4-independent	Binding Up
chr04:988010-988072;+	664.648	-0.784659	0.236288	11.3571	0.000751582	0.00166347	YDR275W	BSC2	IME4-independent	No change
chr04:988109-988287;+	1333.58	0.229486	0.179487	1.6357	0.200917	0.25536	YDR275W	BSC2	IME4-independent	No change
chr04:988334-988432;-	1841.66	1.57057	0.339879	21.1608	4.22309e-06	1.44613e-05	YDR276C	PMP3	IME4-independent	No change
chr04:988623-988677;-	1235.53	1.65922	0.281092	34.7241	3.79907e-09	2.10237e-08	YDR276C	PMP3	IME4-independent	No change
chr04:989367-989410;-	647.536	-1.34246	0.334708	16.1175	5.95327e-05	0.000166381	YDR277C	MTH1	IME4-independent	No change
chr04:989419-989445;-	284.047	-0.852326	0.270005	10.1879	0.00141362	0.00295866	YDR277C	MTH1	IME4-independent	No change
chr04:1007109-1007192;+	696.83	3.56798	0.420324	74.4051	6.36254e-18	8.66494e-17	YDR285W	ZIP1	IME4-independent	Binding Up
chr04:1009479-1009535;+	683.964	3.36807	0.461462	52.8494	3.6013e-13	3.22522e-12	YDR285W	ZIP1	IME4-independent	Binding Up
chr04:1009794-1009948;+	856.294	4.00931	0.44012	81.948	1.39716e-19	2.14224e-18	YDR285W	ZIP1	IME4-independent	Binding Up
chr04:1020138-1020202;-	652.604	-1.25794	0.225304	31.5548	1.93895e-08	9.56885e-08	YDR293C	SSD1	IME4-independent	No change
chr04:1020210-1020289;-	1215.62	-2.66816	0.232816	132.683	1.06047e-30	3.17535e-29	YDR293C	SSD1	IME4-dependent	Binding Down
chr04:1020292-1020336;-	796.474	-1.33333	0.262715	25.7922	3.80226e-07	1.54966e-06	YDR293C	SSD1	IME4-independent	No change
chr04:1020431-1020458;-	550.076	-1.10675	0.2627	17.8688	2.36668e-05	7.12007e-05	YDR293C	SSD1	IME4-independent	No change
chr04:1031323-1031378;+	351.161	-0.0726006	0.300398	0.0585075	0.808871	0.842536	YDR297W	SUR2	IME4-independent	No change
chr04:1031573-1031730;+	427.981	0.750129	0.266581	8.04335	0.0045671	0.00852724	YDR297W	SUR2	IME4-independent	No change
chr04:1032307-1032453;+	603.071	-0.823556	0.256787	10.3513	0.00129382	0.00273366	YDR297W	SUR2	IME4-independent	No change
chr04:1032738-1032815;-	485.99	2.01687	0.283833	53.1049	3.16202e-13	2.84614e-12	YDR298C	ATP5	IME4-independent	Binding Up
chr04:1033360-1033446;-	445.351	2.45568	0.345873	56.6158	5.29839e-14	5.11602e-13	YDR298C	ATP5	IME4-independent	Binding Up
chr04:1033458-1033525;-	429.417	1.20513	0.335527	12.6711	0.000371348	0.000878764	YDR298C	ATP5	IME4-independent	No change
chr04:1054658-1054693;-	203.799	-0.0239391	0.313701	0.00582923	0.939141	0.95112	YDR309C	GIC2	IME4-independent	No change
chr04:1054788-1054823;-	353.168	0.144816	0.378928	0.14662	0.701787	0.753015	YDR309C	GIC2	IME4-independent	No change
chr04:1055645-1055701;-	358.412	-3.96552	0.377217	148.827	3.12921e-34	1.1221e-32	YDR310C	SUM1	IME4-dependent	Binding Down
chr04:1063728-1063780;-	264.595	1.68154	0.345742	23.7209	1.11368e-06	4.21985e-06	YDR313C	PIB1	IME4-independent	No change
chr04:1063823-1063879;-	229.946	2.46981	0.464472	31.2813	2.23225e-08	1.09194e-07	YDR313C	PIB1	IME4-independent	Binding Up
chr04:1064399-1064507;-	254.161	1.48667	0.35966	16.8937	3.95335e-05	0.000114556	YDR313C	PIB1	IME4-independent	No change
chr04:1064708-1064760;-	209.235	-0.185018	0.573825	0.105907	0.744853	0.789227	YDR313C	PIB1	IME4-independent	No change
chr04:1081960-1082011;-	361.47	1.72089	0.288644	36.0648	1.90867e-09	1.10148e-08	YDR322C-A	TIM11	IME4-independent	No change
chr04:1082157-1082195;-	269.839	1.79442	0.315458	33.0695	8.89236e-09	4.62184e-08	YDR322C-A	TIM11	IME4-independent	No change
chr04:1090619-1090663;-	491.768	-1.85321	0.387927	23.3077	1.38045e-06	5.16248e-06	YDR326C	YSP2	IME4-independent	No change
chr04:1090720-1090756;-	493.735	-1.0582	0.401366	6.95563	0.00835558	0.0147345	YDR326C	YSP2	IME4-independent	No change
chr04:1095401-1095509;-	315.146	0.973488	0.284854	11.6532	0.000640936	0.00144519	YDR328C	SKP1	IME4-independent	No change
chr04:1095512-1095593;-	272.57	0.714673	0.31526	5.09828	0.0239496	0.0380057	YDR328C	SKP1	IME4-independent	No change
chr04:1095624-1095668;-	220.378	0.11957	0.387573	0.0948808	0.758062	0.800646	YDR328C	SKP1	IME4-independent	No change
chr04:1096042-1096079;-	230.443	0.21038	0.370547	0.321051	0.570977	0.632892	YDR328C	SKP1	IME4-independent	No change
chr04:1109811-1109872;+	356.584	-3.77893	0.358278	162.08	3.97303e-37	1.64335e-35	YDR334W	SWR1	IME4-dependent	Binding Down
chr04:1113033-1113104;+	221.226	-2.47073	0.522373	32.1459	1.43021e-08	7.18579e-08	YDR335W	MSN5	IME4-dependent	Binding Down
chr04:1114370-1114513;+	214.042	1.07298	0.38678	7.89459	0.00495828	0.00919582	YDR335W	MSN5	IME4-independent	No change
chr04:1114916-1115038;+	216.347	0.85873	0.370764	5.42673	0.0198308	0.0320879	YDR335W	MSN5	IME4-independent	No change
chr04:1130224-1130283;-	3376.46	1.17868	0.355977	10.9943	0.000913942	0.00198624	YDR342C	HXT7	IME4-independent	No change
chr04:1130290-1130351;-	3616.5	1.22991	0.347026	12.551	0.000395991	0.000931714	YDR342C	HXT7	IME4-independent	No change
chr04:1130686-1130761;-	3201.49	1.4308	0.374505	14.7807	0.000120762	0.000316982	YDR342C	HXT7	IME4-independent	No change
chr04:1130792-1130963;-	3696.55	1.17396	0.371159	9.98819	0.00157547	0.00326133	YDR342C	HXT7	IME4-independent	No change
chr04:1137704-1137788;-	243.075	2.26341	0.312995	54.6928	1.40925e-13	1.31394e-12	YDR346C	SVF1	IME4-independent	Binding Up
chr04:1139383-1139431;-	226.658	3.81577	0.420093	113.781	1.4556e-26	3.57588e-25	YDR346C	SVF1	IME4-independent	Binding Up
chr04:1139450-1139504;-	320.005	2.91959	0.290133	112.337	3.01438e-26	7.24511e-25	YDR346C	SVF1	IME4-independent	Binding Up
chr04:1139514-1139562;-	275.82	2.89623	0.313787	95.5249	1.46042e-22	2.76919e-21	YDR346C	SVF1	IME4-independent	Binding Up
chr04:1143083-1143203;-	242.251	2.96128	0.433629	62.1219	3.22835e-15	3.50118e-14	YDR349C	YPS7	IME4-independent	Binding Up
chr04:1144223-1144364;-	215.287	1.44805	0.412512	12.6065	0.000384412	0.000907506	YDR349C	YPS7	IME4-independent	No change
chr04:1154978-1155081;+	209.347	-0.0580441	0.288064	0.0406175	0.840278	0.868099	YDR353W	TRR1	IME4-independent	No change
chr04:1159688-1159755;+	218.465	1.51856	0.427025	13.1233	0.000291644	0.000706699	YDR356W	SPC110	IME4-independent	No change
chr04:1159859-1159903;+	220.693	0.783744	0.402777	3.76024	0.0524851	0.0770215	YDR356W	SPC110	IME4-independent	No change
chr04:1162632-1162767;-	436.645	-0.556645	0.264372	4.48547	0.0341842	0.0522855	YDR359C	EAF1	IME4-independent	No change
chr04:1162949-1163012;-	229.487	-0.846278	0.348525	6.21106	0.0126955	0.0215213	YDR359C	EAF1	IME4-independent	No change
chr04:1163492-1163541;-	209.499	-1.39081	0.417611	12.3186	0.000448472	0.00104132	YDR359C	EAF1	IME4-independent	No change
chr04:1164778-1164828;-	209.947	-1.61209	0.420802	17.0905	3.56401e-05	0.000103858	YDR359C	EAF1	IME4-independent	No change
chr04:1188108-1188245;+	203.658	-1.73307	0.336813	30.6757	3.04961e-08	1.46437e-07	YDR373W	FRQ1	IME4-independent	No change
chr04:1188323-1188367;-	570.683	1.81785	0.434801	17.0726	3.59779e-05	0.00010473	YDR374C	YDR374C	IME4-independent	No change
chr04:1188762-1188822;-	595.872	0.677385	0.380541	3.04748	0.0808626	0.113353	YDR374C	YDR374C	IME4-independent	No change
chr04:1188909-1188950;-	564.865	1.47276	0.444149	10.5878	0.00113839	0.00242775	YDR374C	YDR374C	IME4-independent	No change
chr04:1189790-1189920;+	270.124	0.0028285	0.287841	9.70792e-05	0.992139	0.993479	YDR374W-A	WIP1	IME4-independent	No change
chr04:1190038-1190103;-	213.966	-2.16829	0.346464	50.0545	1.49535e-12	1.2581e-11	YDR375C	BCS1	IME4-dependent	Binding Down
chr04:1193523-1193555;+	430.055	2.40182	0.40855	38.3619	5.87691e-10	3.58952e-09	YDR377W	ATP17	IME4-independent	Binding Up
chr04:1193789-1193842;+	499.436	1.03325	0.331741	9.75478	0.00178857	0.00365734	YDR377W	ATP17	IME4-independent	No change
chr04:1193863-1193915;+	543.081	0.202439	0.272258	0.552563	0.457272	0.522824	YDR377W	ATP17	IME4-independent	No change
chr04:1193925-1194010;+	589.02	0.260065	0.271887	0.915033	0.338783	0.403697	YDR377W	ATP17	IME4-independent	No change
chr04:1194066-1194153;-	203.107	-1.72642	0.30349	33.8059	6.08946e-09	3.25246e-08	YDR378C	LSM6	IME4-independent	No change
chr04:1197956-1198044;+	214.302	-3.52676	0.327791	172.169	2.48548e-39	1.16949e-37	YDR379W	RGA2	IME4-dependent	Binding Down
chr04:1198920-1198971;+	346.293	3.07657	0.324453	97.6996	4.86926e-23	9.58015e-22	YDR380W	ARO10	IME4-independent	Binding Up
chr04:1199602-1199672;+	294.975	3.24751	0.43387	63.1343	1.93083e-15	2.14905e-14	YDR380W	ARO10	IME4-independent	Binding Up
chr04:1199950-1200021;+	303.039	0.99767	0.384756	6.18309	0.0128977	0.0218308	YDR380W	ARO10	IME4-independent	No change
chr04:1200051-1200125;+	296.971	2.06263	0.385379	27.037	1.99598e-07	8.50517e-07	YDR380W	ARO10	IME4-independent	Binding Up
chr04:1200294-1200346;+	309.459	1.16125	0.355473	9.7927	0.00175206	0.0035901	YDR380W	ARO10	IME4-independent	No change
chr04:1200404-1200482;+	347.695	2.37744	0.29364	64.174	1.139e-15	1.29363e-14	YDR380W	ARO10	IME4-independent	Binding Up
chr04:1200976-1201037;+	325.202	2.43116	0.332619	52.4904	4.32356e-13	3.83727e-12	YDR380W	ARO10	IME4-independent	Binding Up
chr04:1202938-1202973;+	731.578	-0.154857	0.178937	0.754206	0.385148	0.451058	YDR381W	YRA1	IME4-independent	No change
chr04:1203488-1203514;-	210.793	-0.0541495	0.27193	0.0396715	0.842124	0.869703	YDR381C-A	YDR381C-A	IME4-independent	No change
chr04:1205860-1205894;-	1111.73	0.102394	0.231397	0.195954	0.658007	0.713094	YDR384C	ATO3	IME4-independent	No change
chr04:1206018-1206051;-	1083.83	-0.106169	0.35183	0.0911292	0.762747	0.804448	YDR384C	ATO3	IME4-independent	No change
chr04:1206153-1206198;-	1726.8	-1.3794	0.190601	52.6082	4.07179e-13	3.61742e-12	YDR384C	ATO3	IME4-independent	No change
chr04:1210608-1210659;+	280.581	-3.99208	0.391445	128.895	7.14956e-30	2.06432e-28	YDR385W	EFT2	IME4-dependent	Binding Down
chr04:1215634-1215734;+	339.598	-0.638173	0.252152	6.48168	0.0108992	0.0187334	YDR388W	RVS167	IME4-independent	No change
chr04:1216474-1216509;+	237.941	0.285688	0.268157	1.13552	0.286602	0.348428	YDR388W	RVS167	IME4-independent	No change
chr04:1219440-1219477;+	680.6	-5.52075	0.483278	165.391	7.5151e-38	3.21307e-36	YDR389W	SAC7	IME4-dependent	Binding Down
chr04:1226793-1226914;+	391.858	2.20708	0.284323	63.1753	1.89103e-15	2.10738e-14	YDR394W	RPT3	IME4-independent	Binding Up
chr04:1226984-1227061;+	342.396	2.4729	0.348169	54.8136	1.32521e-13	1.23924e-12	YDR394W	RPT3	IME4-independent	Binding Up
chr04:1227389-1227435;+	334.714	2.45174	0.36188	49.6454	1.84201e-12	1.53237e-11	YDR394W	RPT3	IME4-independent	Binding Up
chr04:1227445-1227482;+	281.074	2.19621	0.481371	21.9128	2.85329e-06	1.00754e-05	YDR394W	RPT3	IME4-independent	Binding Up
chr04:1227546-1227573;+	277.833	2.64397	0.530921	28.05	1.18224e-07	5.18426e-07	YDR394W	RPT3	IME4-independent	Binding Up
chr04:1227636-1227686;+	289.013	1.93084	0.43504	20.0819	7.41967e-06	2.4384e-05	YDR394W	RPT3	IME4-independent	No change
chr04:1235493-1235589;+	938.516	-0.0592934	0.285671	0.0430802	0.835574	0.864243	YDR399W	HPT1	IME4-independent	No change
chr04:1243185-1243291;+	214.749	1.33222	0.253836	28.1949	1.09695e-07	4.8341e-07	YDR405W	MRP20	IME4-independent	No change
chr04:1269828-1269887;+	205.987	-3.53389	0.379324	121.274	3.32782e-28	8.72988e-27	YDR419W	RAD30	IME4-dependent	Binding Down
chr04:1276140-1276216;+	344.184	-2.88246	0.410365	52.1916	5.0341e-13	4.44571e-12	YDR420W	HKR1	IME4-dependent	Binding Down
chr04:1276300-1276375;+	211.56	-0.6598	0.37499	3.10121	0.0782343	0.110155	YDR420W	HKR1	IME4-independent	No change
chr04:1279824-1279888;-	244.6	-1.85809	0.27984	51.5139	7.10926e-13	6.18617e-12	YDR422C	SIP1	IME4-independent	No change
chr04:1284102-1284170;-	203.474	-2.88856	0.403528	70.6252	4.31956e-17	5.53514e-16	YDR424C	DYN2	IME4-dependent	Binding Down
chr04:1286857-1286903;+	308.254	1.99181	0.532779	13.7903	0.000204387	0.000508393	YDR427W	RPN9	IME4-independent	No change
chr04:1287040-1287129;+	331.214	1.94739	0.418587	21.3685	3.78952e-06	1.30909e-05	YDR427W	RPN9	IME4-independent	No change
chr04:1287299-1287405;+	356.384	2.17008	0.362944	36.275	1.71348e-09	9.92701e-09	YDR427W	RPN9	IME4-independent	Binding Up
chr04:1287944-1288021;+	329.026	1.19277	0.421983	7.60132	0.00583255	0.0106792	YDR427W	RPN9	IME4-independent	No change
chr04:1303695-1303754;+	326.54	-1.35622	0.362511	14.7923	0.000120022	0.000315413	YDR438W	THI74	IME4-independent	No change
chr04:1303858-1303955;+	292.559	-0.458364	0.336367	1.88356	0.16993	0.219809	YDR438W	THI74	IME4-independent	No change
chr04:1321720-1321747;-	392.79	0.751389	0.424536	3.13166	0.0767856	0.108413	YDR449C	UTP6	IME4-independent	No change
chr04:1327369-1327434;+	340.161	-2.13296	0.400989	37.4813	9.2294e-10	5.51964e-09	YDR452W	PPN1	IME4-dependent	Binding Down
chr04:1328715-1328766;+	246.17	-1.15486	0.628677	3.81354	0.0508398	0.0748912	YDR452W	PPN1	IME4-independent	No change
chr04:1330445-1330478;-	224.367	-2.40925	0.409061	40.8169	1.67177e-10	1.10618e-09	YDR454C	GUK1	IME4-dependent	Binding Down
chr04:1333536-1333624;+	251.007	-0.609551	0.300521	4.24196	0.0394366	0.0595331	YDR456W	NHX1	IME4-independent	No change
chr04:1336514-1336678;+	317.946	-1.00387	0.492452	4.40755	0.0357802	0.0545412	YDR457W	TOM1	IME4-independent	No change
chr04:1337087-1337115;+	283.849	1.80985	0.734258	6.727	0.00949644	0.0165106	YDR457W	TOM1	IME4-independent	No change
chr04:1337741-1337795;+	289.735	0.0722614	0.597905	0.0145645	0.903942	0.922722	YDR457W	TOM1	IME4-independent	No change
chr04:1338177-1338235;+	323.993	0.643944	0.450698	2.03664	0.153548	0.201016	YDR457W	TOM1	IME4-independent	No change
chr04:1342038-1342117;+	336.009	-0.180055	0.426396	0.178419	0.672735	0.726136	YDR457W	TOM1	IME4-independent	No change
chr04:1342593-1342628;+	283.962	3.07338	0.929652	15.5884	7.87358e-05	0.000215445	YDR457W	TOM1	IME4-independent	Binding Up
chr04:1342893-1343033;+	381.405	0.999667	0.374878	7.14848	0.00750276	0.0133436	YDR457W	TOM1	IME4-independent	No change
chr04:1343121-1343296;+	363.58	1.01922	0.395815	6.67176	0.00979524	0.0169737	YDR457W	TOM1	IME4-independent	No change
chr04:1343300-1343395;+	299.835	1.30785	0.55222	5.82643	0.0157872	0.0261152	YDR457W	TOM1	IME4-independent	No change
chr04:1343524-1343560;+	295.057	1.62277	0.597318	7.93763	0.00484173	0.00899844	YDR457W	TOM1	IME4-independent	No change
chr04:1343652-1343707;+	309.83	0.105169	0.492749	0.0453675	0.83133	0.861055	YDR457W	TOM1	IME4-independent	No change
chr04:1343720-1343795;+	311.97	0.557636	0.482903	1.32938	0.248916	0.308603	YDR457W	TOM1	IME4-independent	No change
chr04:1343813-1343888;+	355.592	-0.33659	0.39414	0.733238	0.391836	0.457476	YDR457W	TOM1	IME4-independent	No change
chr04:1344111-1344195;-	281.155	-4.26099	0.328963	272.669	2.97357e-61	3.22488e-59	YDR458C	HEH2	IME4-dependent	Binding Down
chr04:1352663-1352793;+	435.522	-1.81903	0.205588	85.6492	2.14863e-20	3.53194e-19	YDR463W	STP1	IME4-independent	No change
chr04:1371598-1371676;-	204.624	-1.78948	0.279431	44.6969	2.30018e-11	1.70463e-10	YDR475C	JIP4	IME4-independent	No change
chr04:1372324-1372359;-	203.773	0.447939	0.290549	2.43526	0.118634	0.159175	YDR475C	JIP4	IME4-independent	No change
chr04:1379375-1379523;-	308.326	-2.78615	0.241567	151.869	6.76739e-35	2.52867e-33	YDR479C	YDR479C	IME4-dependent	Binding Down
chr04:1382688-1382738;-	465.962	-0.0607175	0.264844	0.0524835	0.818797	0.850948	YDR481C	PHO8	IME4-independent	No change
chr04:1382890-1382918;-	389.804	0.371852	0.335671	1.23953	0.265561	0.326373	YDR481C	PHO8	IME4-independent	No change
chr04:1383051-1383132;-	484.014	-0.127307	0.248511	0.262126	0.608663	0.668087	YDR481C	PHO8	IME4-independent	No change
chr04:1386503-1386571;+	281.215	-1.3245	0.319843	18.2127	1.97557e-05	6.03738e-05	YDR483W	KRE2	IME4-independent	No change
chr04:1386740-1386808;+	356.827	-1.15677	0.245653	23.071	1.56127e-06	5.78035e-06	YDR483W	KRE2	IME4-independent	No change
chr04:1399471-1399510;+	350.97	1.67272	0.623152	7.15278	0.00748479	0.0133178	YDR492W	IZH1	IME4-independent	No change
chr04:1400079-1400185;+	464.209	-0.530191	0.300261	3.11787	0.077438	0.109207	YDR492W	IZH1	IME4-independent	No change
chr04:1407900-1408011;-	538.4	-0.670749	0.242118	7.70926	0.00549383	0.0101193	YDR497C	ITR1	IME4-independent	No change
chr04:1408131-1408177;-	317.189	1.64755	0.403014	18.7271	1.50826e-05	4.71788e-05	YDR497C	ITR1	IME4-independent	No change
chr04:1408396-1408458;-	343.715	0.275221	0.349504	0.620465	0.430875	0.496665	YDR497C	ITR1	IME4-independent	No change
chr04:1408485-1408517;-	311.499	0.350396	0.353181	0.988887	0.320015	0.38432	YDR497C	ITR1	IME4-independent	No change
chr04:1408624-1408654;-	287.942	0.816567	0.405343	4.19358	0.0405773	0.0610375	YDR497C	ITR1	IME4-independent	No change
chr04:1409317-1409357;-	286.702	0.30115	0.383447	0.620491	0.430865	0.496665	YDR497C	ITR1	IME4-independent	No change
chr04:1409458-1409495;-	293.712	0.398393	0.374699	1.14008	0.285635	0.347533	YDR497C	ITR1	IME4-independent	No change
chr04:1409515-1409543;-	270.313	1.03981	0.458202	5.46189	0.0194356	0.0315	YDR497C	ITR1	IME4-independent	No change
chr04:1417492-1417545;-	214.987	0.562895	0.36685	2.37948	0.122938	0.164429	YDR502C	SAM2	IME4-independent	No change
chr04:1419255-1419332;-	293.48	-4.04936	0.331642	190.746	2.18472e-43	1.1993e-41	YDR503C	LPP1	IME4-dependent	Binding Down
chr04:1419457-1419510;-	298.34	-4.63094	0.363287	241.228	2.12286e-54	1.781e-52	YDR503C	LPP1	IME4-dependent	Binding Down
chr04:1420655-1420692;-	269.361	1.47401	0.306342	23.8918	1.01904e-06	3.89274e-06	YDR504C	SPG3	IME4-independent	No change
chr04:1420724-1420770;-	314.766	0.753186	0.270283	7.78682	0.00526289	0.00971619	YDR504C	SPG3	IME4-independent	No change
chr04:1421180-1421248;-	357.328	2.06141	0.316701	48.1629	3.92249e-12	3.17693e-11	YDR505C	PSP1	IME4-independent	Binding Up
chr04:1421374-1421413;-	312.908	0.699998	0.339379	4.23388	0.0396247	0.0597432	YDR505C	PSP1	IME4-independent	No change
chr04:1421470-1421528;-	377.561	0.11462	0.263257	0.188974	0.663772	0.718205	YDR505C	PSP1	IME4-independent	No change
chr04:1421618-1421670;-	332.381	0.296593	0.309406	0.911125	0.339816	0.40482	YDR505C	PSP1	IME4-independent	No change
chr04:1423079-1423118;-	289.021	2.10812	0.443866	26.1049	3.23363e-07	1.33318e-06	YDR505C	PSP1	IME4-independent	Binding Up
chr04:1423316-1423358;-	309.07	1.53795	0.368923	18.4197	1.77216e-05	5.46835e-05	YDR505C	PSP1	IME4-independent	No change
chr04:1426576-1426677;-	809.167	-5.31559	0.332735	261.966	6.39714e-59	6.39211e-57	YDR507C	GIN4	IME4-dependent	Binding Down
chr04:1434089-1434148;+	432.142	1.65248	0.271453	36.9811	1.19277e-09	7.03869e-09	YDR510W	SMT3	IME4-independent	No change
chr04:1435396-1435480;+	215.811	1.03837	0.311975	11.3131	0.000769611	0.0017005	YDR513W	GRX2	IME4-independent	No change
chr04:1435868-1435923;+	202.429	0.630219	0.334481	3.54294	0.0597992	0.0867811	YDR513W	GRX2	IME4-independent	No change
chr04:1455110-1455147;+	699.947	1.68282	0.351433	22.7868	1.81007e-06	6.6188e-06	YDR525W-A	SNA2	IME4-independent	No change
chr04:1455346-1455419;+	988.836	2.1669	0.212377	104.38	1.66974e-24	3.56947e-23	YDR525W-A	SNA2	IME4-independent	Binding Up
chr04:1460324-1460380;+	204.083	-4.64609	0.417673	232.071	2.10759e-52	1.64411e-50	YDR528W	HLR1	IME4-dependent	Binding Down
chr04:1460399-1460491;-	595.02	1.57412	0.207607	58.5023	2.03057e-14	2.02669e-13	YDR529C	QCR7	IME4-independent	No change
chr04:1460897-1460951;-	437.35	1.64953	0.284478	34.4989	4.26497e-09	2.34126e-08	YDR529C	QCR7	IME4-independent	No change
chr04:1463903-1463953;-	270.541	-4.90011	0.528596	219.296	1.28834e-49	9.31478e-48	YDR532C	KRE28	IME4-dependent	Binding Down
chr05:21044-21100;+	858.286	0.68678	0.967141	0.50395	0.477769	0.543048	YEL065W	SIT1	IME4-independent	No change
chr05:21208-21248;+	815.669	1.39587	0.575721	5.87025	0.0153989	0.0255585	YEL065W	SIT1	IME4-independent	No change
chr05:22151-22203;+	994.545	0.676057	0.87389	0.597892	0.439384	0.505095	YEL065W	SIT1	IME4-independent	No change
chr05:22254-22308;+	982.616	0.169798	0.52	0.106894	0.743708	0.788295	YEL065W	SIT1	IME4-independent	No change
chr05:22335-22364;+	835.366	0.215495	0.581165	0.13783	0.710448	0.760903	YEL065W	SIT1	IME4-independent	No change
chr05:22667-22733;+	849.793	0.501405	0.918766	0.2979	0.585202	0.646726	YEL065W	SIT1	IME4-independent	No change
chr05:24617-24656;-	244.409	-0.785024	0.320349	6.22182	0.0126185	0.0214113	YEL063C	CAN1	IME4-independent	No change
chr05:24684-24723;-	247.487	0.865261	0.319794	7.61903	0.00577554	0.0105835	YEL063C	CAN1	IME4-independent	No change
chr05:24771-24831;-	292.752	-0.139894	0.253974	0.30392	0.581436	0.643043	YEL063C	CAN1	IME4-independent	No change
chr05:25015-25088;-	283.988	0.165059	0.264504	0.389845	0.532381	0.595755	YEL063C	CAN1	IME4-independent	No change
chr05:25561-25606;-	224.114	0.679027	0.354081	3.77031	0.0521701	0.0766097	YEL063C	CAN1	IME4-independent	No change
chr05:26187-26233;-	224.345	0.613477	0.357212	3.00897	0.0828048	0.115711	YEL063C	CAN1	IME4-independent	No change
chr05:26261-26294;-	237.803	0.428937	0.902146	0.226062	0.63446	0.691029	YEL063C	CAN1	IME4-independent	No change
chr05:33004-33214;-	3310.46	1.0546	0.302072	12.1283	0.000496621	0.00114268	YEL060C	PRB1	IME4-independent	No change
chr05:33363-33409;-	1913.84	0.386691	0.247776	2.42683	0.119274	0.16001	YEL060C	PRB1	IME4-independent	No change
chr05:34021-34055;-	1749.58	1.73891	0.285682	38.4068	5.74319e-10	3.51025e-09	YEL060C	PRB1	IME4-independent	No change
chr05:34316-34347;-	1747.95	1.45693	0.307863	22.676	1.91752e-06	6.98585e-06	YEL060C	PRB1	IME4-independent	No change
chr05:34919-34961;-	1861.03	-0.503132	0.257361	3.8559	0.0495712	0.0732165	YEL060C	PRB1	IME4-independent	No change
chr05:35041-35080;-	1993.75	1.49858	0.32333	21.4323	3.66537e-06	1.2708e-05	YEL060C	PRB1	IME4-independent	No change
chr05:45436-45459;-	256.844	0.0537582	0.398183	0.0183058	0.892376	0.912924	snR80	snR80	IME4-independent	No change
chr05:52160-52220;+	207.118	0.0538656	0.284301	0.0359078	0.849706	0.876515	YEL051W	VMA8	IME4-independent	No change
chr05:54462-54498;+	1149.16	0.455073	0.575676	0.62468	0.429313	0.49525	snR67	snR67	IME4-independent	No change
chr05:54805-54840;+	273.091	1.2672	0.765466	2.73044	0.098452	0.135134	snR53	snR53	IME4-independent	No change
chr05:60205-60245;-	256.739	-2.06669	0.31305	52.8313	3.63465e-13	3.24853e-12	YEL046C	GLY1	IME4-dependent	Binding Down
chr05:64184-64235;+	218.184	1.26208	0.335338	14.8163	0.000118504	0.000311883	YEL043W	YEL043W	IME4-independent	No change
chr05:68160-68228;+	236.747	-2.74421	0.341014	81.3551	1.88598e-19	2.88179e-18	YEL042W	GDA1	IME4-dependent	Binding Down
chr05:79846-79899;+	230.325	-3.07336	0.382136	90.1317	2.22819e-21	3.90064e-20	YEL038W	UTR4	IME4-dependent	Binding Down
chr05:80003-80041;-	346.017	-0.819052	1.11012	0.544932	0.460396	0.525922	YEL037C	RAD23	IME4-independent	No change
chr05:84382-84414;+	857.547	0.904423	0.302719	8.9346	0.00279819	0.00548596	YEL034W	HYP2	IME4-independent	No change
chr05:84730-84981;+	3944.68	0.793144	0.442855	3.19906	0.0736804	0.104454	YEL034W	HYP2	IME4-independent	No change
chr05:86645-86713;+	964.404	-5.67221	0.356208	365.36	1.91609e-81	4.05709e-79	YEL032W	MCM3	IME4-dependent	Binding Down
chr05:86755-86780;+	271.085	-3.69056	0.387414	142.449	7.7587e-33	2.5842e-31	YEL032W	MCM3	IME4-dependent	Binding Down
chr05:92519-92578;+	477.292	-1.97829	0.242385	77.4918	1.33277e-18	1.89941e-17	YEL031W	SPF1	IME4-independent	No change
chr05:99412-99598;+	679.701	1.98569	0.290669	47.0146	7.04614e-12	5.54034e-11	YEL027W	VMA3	IME4-independent	No change
chr05:99612-99708;+	507.985	2.18056	0.37539	34.3153	4.68692e-09	2.55867e-08	YEL027W	VMA3	IME4-independent	Binding Up
chr05:99821-99904;+	460.567	2.61865	0.327021	71.3294	3.02294e-17	3.9131e-16	YEL027W	VMA3	IME4-independent	Binding Up
chr05:100107-100156;+	387.532	2.28577	0.388968	37.6836	8.32022e-10	5.00282e-09	YEL027W	VMA3	IME4-independent	Binding Up
chr05:101014-101056;-	204.836	-2.00843	0.69278	11.666	0.000636518	0.00143669	YEL025C	YEL025C	IME4-independent	No change
chr05:105314-105459;-	206.345	0.789776	0.424138	3.34324	0.0674816	0.0965434	YEL025C	YEL025C	IME4-independent	No change
chr05:106792-106828;+	769.027	1.3209	0.442577	8.89892	0.0028534	0.00558435	YEL024W	RIP1	IME4-independent	No change
chr05:106856-106889;+	783.522	0.228471	0.318626	0.513988	0.473417	0.538859	YEL024W	RIP1	IME4-independent	No change
chr05:106900-106976;+	982.906	0.488927	0.180565	7.30807	0.00686456	0.0123376	YEL024W	RIP1	IME4-independent	No change
chr05:127748-127839;-	454.738	0.37034	0.207914	3.18272	0.0744207	0.105352	YEL017C-A	PMP2	IME4-independent	No change
chr05:127876-127920;-	312.174	0.446974	0.27584	2.64332	0.103986	0.141941	YEL017C-A	PMP2	IME4-independent	No change
chr05:127926-128006;-	439.897	0.699848	0.221128	10.1479	0.00144465	0.0030172	YEL017C-A	PMP2	IME4-independent	No change
chr05:128022-128063;-	315.707	-0.440264	0.275919	2.58344	0.107987	0.146794	YEL017C-A	PMP2	IME4-independent	No change
chr05:133939-134101;+	293.829	1.66937	0.319518	29.6638	5.13854e-08	2.39237e-07	YEL013W	VAC8	IME4-independent	No change
chr05:135569-135646;+	312.207	-2.50001	0.362624	62.3356	2.89646e-15	3.15664e-14	YEL013W	VAC8	IME4-dependent	Binding Down
chr05:135854-135912;+	228.84	-0.725983	0.370952	3.96925	0.0463383	0.0688878	YEL013W	VAC8	IME4-independent	No change
chr05:135922-135979;+	224.94	0.0713136	0.368269	0.0374668	0.846518	0.873862	YEL013W	VAC8	IME4-independent	No change
chr05:137334-137564;+	265.539	1.67721	0.304499	31.0306	2.53999e-08	1.23365e-07	YEL012W	UBC8	IME4-independent	No change
chr05:137725-137825;+	210.1	0.0756106	0.371083	0.0413715	0.838823	0.866998	YEL012W	UBC8	IME4-independent	No change
chr05:139365-139399;+	387.294	0.61206	0.353667	3.07114	0.0796936	0.111944	YEL011W	GLC3	IME4-independent	No change
chr05:140518-140544;+	381.926	-1.17323	0.353501	11.5154	0.000690225	0.00154225	YEL011W	GLC3	IME4-independent	No change
chr05:140549-140598;+	549.392	-1.98358	0.26106	63.2473	1.82321e-15	2.04204e-14	YEL011W	GLC3	IME4-independent	No change
chr05:144493-144521;-	2825.85	1.6966	0.212335	63.9332	1.28709e-15	1.45625e-14	YEL009C	GCN4	IME4-independent	No change
chr05:144538-144569;-	2889.86	0.952023	0.263763	12.9992	0.00031162	0.000750199	YEL009C	GCN4	IME4-independent	No change
chr05:144608-144636;-	2474.61	1.1704	0.275609	18.0498	2.15199e-05	6.51827e-05	YEL009C	GCN4	IME4-independent	No change
chr05:145117-145148;-	2698.44	2.26446	0.477134	22.1064	2.57944e-06	9.17192e-06	YEL009C	GCN4	IME4-independent	Binding Up
chr05:145224-145255;-	2685.57	1.3172	0.280592	21.9989	2.72812e-06	9.65809e-06	YEL009C	GCN4	IME4-independent	No change
chr05:148125-148195;+	1133.85	-3.50617	0.387307	79.5951	4.59553e-19	6.7439e-18	YEL007W	YEL007W	IME4-dependent	Binding Down
chr05:154183-154327;-	210.421	-1.71451	0.362055	26.0443	3.33675e-07	1.36935e-06	YEL002C	WBP1	IME4-independent	No change
chr05:160867-160946;+	248.316	-2.4913	0.309759	78.8481	6.70745e-19	9.652e-18	YER001W	MNN1	IME4-dependent	Binding Down
chr05:162733-162871;-	303.684	0.325341	0.290266	1.2519	0.26319	0.323996	YER003C	PMI40	IME4-independent	No change
chr05:163143-163179;-	216.144	0.34254	0.389842	0.771976	0.379606	0.445361	YER003C	PMI40	IME4-independent	No change
chr05:163914-163974;-	209.797	0.507676	0.408475	1.55249	0.212768	0.268695	YER003C	PMI40	IME4-independent	No change
chr05:165292-165416;+	1857.17	-2.30183	0.218298	110.396	8.02607e-26	1.84912e-24	YER004W	FMP52	IME4-dependent	Binding Down
chr05:177254-177367;+	202.242	2.15526	0.362411	37.1046	1.11961e-09	6.6334e-09	YER009W	NTF2	IME4-independent	Binding Up
chr05:177374-177502;+	219.916	1.62058	0.321257	25.3621	4.75173e-07	1.90691e-06	YER009W	NTF2	IME4-independent	No change
chr05:177899-177975;-	321.206	-0.271068	0.296419	0.845764	0.357753	0.423804	YER010C	YER010C	IME4-independent	No change
chr05:178027-178068;-	231.942	0.804143	0.388422	4.26541	0.0388958	0.0587766	YER010C	YER010C	IME4-independent	No change
chr05:183729-183762;+	208.076	1.15207	0.477824	5.55468	0.0184314	0.0300147	YER012W	PRE1	IME4-independent	No change
chr05:183768-183869;+	316.969	1.17658	0.288229	16.3176	5.3563e-05	0.000151122	YER012W	PRE1	IME4-independent	No change
chr05:189834-189886;+	309.128	1.4499	0.649153	5.03538	0.0248347	0.0392282	YER015W	FAA2	IME4-independent	No change
chr05:192170-192319;+	567.18	-3.56871	0.253272	242.957	8.91004e-55	7.76833e-53	YER015W	FAA2	IME4-dependent	Binding Down
chr05:201761-201874;+	914.187	-3.28119	0.225769	234.184	7.29458e-53	5.8442e-51	YER020W	GPA2	IME4-dependent	Binding Down
chr05:201909-201966;+	424.98	-0.913193	0.225887	16.533	4.78096e-05	0.000136055	YER020W	GPA2	IME4-independent	No change
chr05:202216-202318;+	542.505	2.2901	0.347027	44.8116	2.16931e-11	1.61707e-10	YER021W	RPN3	IME4-independent	Binding Up
chr05:202410-202600;+	684.607	1.92461	0.23594	66.3838	3.71133e-16	4.43018e-15	YER021W	RPN3	IME4-independent	No change
chr05:202994-203036;+	516.501	0.695418	0.40257	2.85059	0.0913404	0.126367	YER021W	RPN3	IME4-independent	No change
chr05:203048-203101;+	526.144	2.00388	0.370309	29.2027	6.51898e-08	2.97906e-07	YER021W	RPN3	IME4-independent	Binding Up
chr05:203188-203258;+	525.914	1.5055	0.363091	16.576	4.67395e-05	0.000133351	YER021W	RPN3	IME4-independent	No change
chr05:203634-203682;+	498.558	1.22522	0.438415	7.42863	0.00641943	0.0116506	YER021W	RPN3	IME4-independent	No change
chr05:203720-203815;+	582.003	2.35988	0.305058	61.9576	3.50926e-15	3.77661e-14	YER021W	RPN3	IME4-independent	Binding Up
chr05:203823-203915;+	568.849	1.89296	0.308195	37.3569	9.83715e-10	5.87126e-09	YER021W	RPN3	IME4-independent	No change
chr05:207209-207311;+	226.127	0.534552	0.315688	2.82983	0.0925279	0.127811	YER023W	PRO3	IME4-independent	No change
chr05:208076-208158;+	1873.78	-2.93352	0.199693	240.408	3.20382e-54	2.63811e-52	YER024W	YAT2	IME4-dependent	Binding Down
chr05:210231-210291;+	2360.54	-2.48715	0.192823	168.068	1.95506e-38	8.73686e-37	YER024W	YAT2	IME4-dependent	Binding Down
chr05:212137-212194;+	368.596	0.0659292	0.231712	0.0807066	0.776342	0.816173	YER025W	GCD11	IME4-independent	No change
chr05:212209-212250;+	294.94	-1.25079	0.347427	15.169	9.83035e-05	0.000263238	YER025W	GCD11	IME4-independent	No change
chr05:212286-212341;+	304.764	0.0236435	0.27645	0.00730351	0.931895	0.945181	YER025W	GCD11	IME4-independent	No change
chr05:213059-213239;-	319.469	0.595517	0.25027	5.63769	0.0175783	0.0287255	YER026C	CHO1	IME4-independent	No change
chr05:219476-219616;+	255.358	0.937619	0.266685	12.5137	0.000403969	0.00094839	YER030W	CHZ1	IME4-independent	No change
chr05:223398-223461;+	505.166	-4.9062	0.423756	194.058	4.13713e-44	2.34341e-42	YER032W	FIR1	IME4-dependent	Binding Down
chr05:228903-229020;-	283.902	0.440829	0.27381	2.53009	0.111694	0.151002	YER036C	ARB1	IME4-independent	No change
chr05:237624-237696;+	308.478	0.567905	0.212468	7.21386	0.00723426	0.0129237	YER040W	GLN3	IME4-independent	No change
chr05:241191-241307;-	247.124	1.67786	0.299921	30.7763	2.89559e-08	1.39645e-07	YER043C	SAH1	IME4-independent	No change
chr05:243839-243871;-	216.573	-0.237763	0.474548	0.2579	0.611567	0.670612	YER044C-A	MEI4	IME4-independent	No change
chr05:243872-243900;-	203.746	0.618232	0.419362	2.05468	0.151739	0.198824	YER044C-A	MEI4	IME4-independent	No change
chr05:265952-265986;-	3210.29	0.99262	0.362215	7.47867	0.00624343	0.011373	YER053C-A	YER053C-A	IME4-independent	No change
chr05:267176-267394;-	680.465	-1.13398	0.240875	22.49	2.1124e-06	7.65508e-06	YER054C	GIP2	IME4-independent	No change
chr05:267414-267458;-	296.702	0.392388	0.375717	1.09638	0.295061	0.357596	YER054C	GIP2	IME4-independent	No change
chr05:267802-267917;-	419.592	-0.288479	0.261485	1.22137	0.269091	0.329982	YER054C	GIP2	IME4-independent	No change
chr05:268183-268290;-	398.948	0.221385	0.268006	0.682858	0.408604	0.474562	YER054C	GIP2	IME4-independent	No change
chr05:268440-268485;-	295.145	1.76916	0.430358	19.093	1.24503e-05	3.94443e-05	YER054C	GIP2	IME4-independent	No change
chr05:268568-268624;-	323.001	0.595281	0.343223	3.02365	0.0820585	0.114794	YER054C	GIP2	IME4-independent	No change
chr05:268775-268820;-	303.46	-0.335256	0.36545	0.84789	0.35715	0.423202	YER054C	GIP2	IME4-independent	No change
chr05:268984-269032;-	322.043	0.218162	0.336928	0.417918	0.517978	0.582643	YER054C	GIP2	IME4-independent	No change
chr05:269071-269139;-	346.537	0.0412077	0.303328	0.018431	0.89201	0.912743	YER054C	GIP2	IME4-independent	No change
chr05:271684-271817;-	325.031	0.7972	0.368319	4.69433	0.0302623	0.0468365	YER056C	FCY2	IME4-independent	No change
chr05:290390-290433;-	344.03	0.501488	0.42323	1.40312	0.236202	0.294565	YER065C	ICL1	IME4-independent	No change
chr05:290439-290498;-	365.99	0.314876	0.363324	0.754129	0.385172	0.451058	YER065C	ICL1	IME4-independent	No change
chr05:290527-290679;-	527.505	0.187566	0.364523	0.265127	0.606619	0.666914	YER065C	ICL1	IME4-independent	No change
chr05:290803-290857;-	329.314	0.477689	0.421382	1.29395	0.255321	0.315489	YER065C	ICL1	IME4-independent	No change
chr05:291358-291466;-	540.018	1.09504	0.34975	9.87873	0.00167201	0.00343875	YER065C	ICL1	IME4-independent	No change
chr05:291537-291594;-	282.465	0.362639	0.725005	0.25109	0.616309	0.675048	YER065C	ICL1	IME4-independent	No change
chr05:297432-297483;+	437.318	1.08926	0.755077	2.07439	0.14979	0.19653	YER067W	RGI1	IME4-independent	No change
chr05:297738-297770;+	237.782	0.756819	0.905166	0.69925	0.403036	0.469114	YER067W	RGI1	IME4-independent	No change
chr05:303161-303289;+	296.551	-0.409896	0.225883	3.30251	0.0691743	0.0987268	YER069W	ARG5%2C6	IME4-independent	No change
chr05:305186-305258;+	526.43	-2.95885	0.407839	61.0194	5.65161e-15	5.97619e-14	YER070W	RNR1	IME4-dependent	Binding Down
chr05:306221-306286;+	459.154	-3.71125	0.520577	76.7045	1.98552e-18	2.79387e-17	YER070W	RNR1	IME4-dependent	Binding Down
chr05:306357-306387;+	442.238	-1.07729	0.392681	7.65821	0.00565146	0.0103818	YER070W	RNR1	IME4-independent	No change
chr05:306397-306421;+	403.197	-2.57952	0.497749	33.8215	6.04061e-09	3.22831e-08	YER070W	RNR1	IME4-dependent	Binding Down
chr05:306486-306537;+	415.456	-0.970667	0.397849	6.11227	0.0134247	0.0226281	YER070W	RNR1	IME4-independent	No change
chr05:306868-307037;+	980.068	0.139443	0.598371	0.0542671	0.815798	0.848426	YER070W	RNR1	IME4-independent	No change
chr05:308188-308249;+	306.125	-1.08947	0.763502	2.02858	0.154365	0.201967	YER072W	VTC1	IME4-independent	No change
chr05:308375-308406;+	226.079	0.543648	0.337206	2.62951	0.104894	0.142983	YER072W	VTC1	IME4-independent	No change
chr05:338096-338152;-	221.454	-0.626291	0.31668	4.01451	0.0451102	0.0671743	YER087C-B	SBH1	IME4-independent	No change
chr05:338785-338820;-	321.77	0.808316	0.355791	5.18877	0.0227333	0.0362631	YER088C	DOT6	IME4-independent	No change
chr05:338844-338917;-	593.586	-0.141759	0.313183	0.204895	0.650799	0.706575	YER088C	DOT6	IME4-independent	No change
chr05:338967-338999;-	302.1	-0.455457	0.310962	2.16156	0.141501	0.186784	YER088C	DOT6	IME4-independent	No change
chr05:339038-339096;-	582.403	-2.69515	0.339744	66.8688	2.90191e-16	3.47799e-15	YER088C	DOT6	IME4-dependent	Binding Down
chr05:343106-343159;-	234.131	-0.226551	0.284859	0.632131	0.426575	0.492666	YER089C	PTC2	IME4-independent	No change
chr05:345211-345272;-	407.774	-1.90211	0.237066	65.2549	6.58091e-16	7.73105e-15	YER091C	MET6	IME4-independent	No change
chr05:345277-345302;-	218.591	-0.458554	0.330017	1.87933	0.17041	0.220334	YER091C	MET6	IME4-independent	No change
chr05:345359-345393;-	240.481	-2.2311	0.295464	60.4333	7.61163e-15	7.9542e-14	YER091C	MET6	IME4-dependent	Binding Down
chr05:354300-354354;-	297.548	2.65945	0.32702	69.82	6.4972e-17	8.21901e-16	YER094C	PUP3	IME4-independent	Binding Up
chr05:354444-354511;-	296.268	2.00236	0.311604	40.5732	1.89387e-10	1.24022e-09	YER094C	PUP3	IME4-independent	Binding Up
chr05:354735-354787;-	284.626	2.17034	0.330834	42.8422	5.93381e-11	4.18141e-10	YER094C	PUP3	IME4-independent	Binding Up
chr05:356770-356885;+	1104.55	0.491802	0.305882	2.58185	0.108096	0.146897	YER095W	RAD51	IME4-independent	No change
chr05:358781-358947;+	315.67	1.30951	0.274246	22.6824	1.9111e-06	6.96534e-06	YER096W	SHC1	IME4-independent	No change
chr05:362985-363111;+	202.839	-0.151896	0.29031	0.272976	0.601343	0.662095	YER098W	UBP9	IME4-independent	No change
chr05:372916-373099;-	228.219	1.64887	0.36298	21.6178	3.32756e-06	1.16275e-05	YER105C	NUP157	IME4-independent	No change
chr05:374624-374794;-	204.888	1.62644	0.421884	15.4755	8.35813e-05	0.000227305	YER105C	NUP157	IME4-independent	No change
chr05:380181-380324;-	323.8	-3.57036	0.299398	190.242	2.81537e-43	1.53602e-41	YER109C	FLO8	IME4-dependent	Binding Down
chr05:387658-387703;-	431.373	-0.109903	0.345676	0.1009	0.750753	0.794531	YER111C	SWI4	IME4-independent	No change
chr05:387793-387869;-	423.873	-1.4363	0.413954	12.41	0.000427038	0.000996757	YER111C	SWI4	IME4-independent	No change
chr05:388665-388761;-	482.552	-1.56539	0.340767	22.277	2.36013e-06	8.48025e-06	YER111C	SWI4	IME4-independent	No change
chr05:388848-388881;-	305.095	-0.666035	0.426848	2.50789	0.113278	0.152911	YER111C	SWI4	IME4-independent	No change
chr05:388891-388929;-	294.077	-0.764003	0.675983	1.27908	0.258071	0.318753	YER111C	SWI4	IME4-independent	No change
chr05:392981-393049;+	201.537	1.0762	0.290174	13.9005	0.000192751	0.000482447	YER112W	LSM4	IME4-independent	No change
chr05:395574-395650;-	282.741	1.5393	0.301986	26.6026	2.49908e-07	1.04585e-06	YER114C	BOI2	IME4-independent	No change
chr05:395700-395782;-	233.341	0.682782	0.348748	3.78277	0.0517829	0.0761462	YER114C	BOI2	IME4-independent	No change
chr05:407791-407988;+	472.665	-0.129194	0.249233	0.268456	0.60437	0.664687	YER121W	YER121W	IME4-independent	No change
chr05:408048-408181;-	202.979	-1.14794	0.369669	10.2703	0.00135189	0.00284217	YER122C	GLO3	IME4-independent	No change
chr05:409259-409323;-	209.078	-2.19278	0.433051	31.0478	2.51754e-08	1.22408e-07	YER122C	GLO3	IME4-dependent	Binding Down
chr05:414873-414907;+	200.245	-0.526586	0.4979	1.14347	0.284919	0.346857	YER125W	RSP5	IME4-independent	No change
chr05:414910-414973;+	256.08	-0.674274	0.396729	2.95585	0.0855672	0.119122	YER125W	RSP5	IME4-independent	No change
chr05:417780-417832;+	244.257	1.19674	0.394168	9.46069	0.00209922	0.00423223	YER125W	RSP5	IME4-independent	No change
chr05:418002-418070;+	223.985	1.19902	0.432833	7.88956	0.00497211	0.0092157	YER125W	RSP5	IME4-independent	No change
chr05:426145-426185;-	356.935	-3.88001	0.385196	142.619	7.12173e-33	2.38096e-31	YER130C	YER130C	IME4-dependent	Binding Down
chr05:429803-429835;+	305.281	1.05772	0.415716	6.4828	0.0108923	0.0187288	snR4	snR4	IME4-independent	No change
chr05:429945-429980;+	288.931	0.522931	0.310455	2.83447	0.092261	0.127482	snR4	snR4	IME4-independent	No change
chr05:430199-430264;-	324.775	-0.983949	0.257175	14.8527	0.000116242	0.00030684	YER132C	PMD1	IME4-independent	No change
chr05:430317-430357;-	228.016	-0.612662	0.337374	3.31416	0.0686855	0.0980921	YER132C	PMD1	IME4-independent	No change
chr05:430369-430508;-	309.324	-0.81639	0.273534	8.97569	0.00273596	0.0053758	YER132C	PMD1	IME4-independent	No change
chr05:430778-430827;-	210.228	-3.04501	0.389669	79.2304	5.52726e-19	8.00552e-18	YER132C	PMD1	IME4-dependent	Binding Down
chr05:436309-436349;-	1387.35	1.44083	0.434007	10.9323	0.000945022	0.00204778	snR52	snR52	IME4-independent	No change
chr05:438719-438755;+	502.174	2.13279	0.429181	27.2802	1.76001e-07	7.55029e-07	YER133W	GLC7	IME4-independent	Binding Up
chr05:438827-438874;+	528.627	1.78303	0.364945	25.1405	5.33027e-07	2.11522e-06	YER133W	GLC7	IME4-independent	No change
chr05:438890-438972;+	632.098	0.195169	0.28841	0.458081	0.498522	0.563467	YER133W	GLC7	IME4-independent	No change
chr05:439065-439130;+	556.942	1.43466	0.396634	13.2491	0.000272718	0.000663086	YER133W	GLC7	IME4-independent	No change
chr05:444719-444760;+	347.632	0.787904	0.377629	4.31119	0.0378624	0.0573612	YER136W	GDI1	IME4-independent	No change
chr05:445046-445075;+	341.598	1.60384	0.40986	16.0787	6.07621e-05	0.00016955	YER136W	GDI1	IME4-independent	No change
chr05:445544-445585;+	341.959	1.67578	0.40654	18.005	2.20327e-05	6.66322e-05	YER136W	GDI1	IME4-independent	No change
chr05:445700-445758;+	398.056	0.839078	0.296943	7.93294	0.00485429	0.00901424	YER136W	GDI1	IME4-independent	No change
chr05:445775-445805;+	326.619	0.844717	0.436403	3.72028	0.0537553	0.0787166	YER136W	GDI1	IME4-independent	No change
chr05:445879-445954;+	441.87	1.50865	0.278442	30.2423	3.81302e-08	1.80753e-07	YER136W	GDI1	IME4-independent	No change
chr05:446022-446110;+	464.505	0.202705	0.251773	0.645107	0.421868	0.48799	YER136W	GDI1	IME4-independent	No change
chr05:446190-446281;+	439.779	1.34514	0.271817	24.9857	5.77572e-07	2.28587e-06	YER136W	GDI1	IME4-independent	No change
chr05:447462-447495;+	4670.75	1.40651	0.327336	18.3001	1.88702e-05	5.78863e-05	SCR1	SCR1	IME4-independent	No change
chr05:452718-452800;+	277.153	2.02	0.324212	41.3312	1.28502e-10	8.68368e-10	YER141W	COX15	IME4-independent	Binding Up
chr05:453995-454031;+	246.934	1.52148	0.355454	18.5025	1.69681e-05	5.25407e-05	YER141W	COX15	IME4-independent	No change
chr05:454059-454114;+	297.342	1.45823	0.285332	26.2453	3.0068e-07	1.24834e-06	YER141W	COX15	IME4-independent	No change
chr05:454170-454197;+	255.823	1.8483	0.348798	29.3114	6.16319e-08	2.8296e-07	YER141W	COX15	IME4-independent	No change
chr05:454229-454302;-	270.972	-3.78706	0.463675	122.595	1.71033e-28	4.52678e-27	YER142C	MAG1	IME4-dependent	Binding Down
chr05:456671-456778;+	254.631	1.12723	0.326068	11.8379	0.00058036	0.00131882	YER143W	DDI1	IME4-independent	No change
chr05:457385-457581;-	200.341	-0.406281	0.316666	1.65474	0.198315	0.252306	YER144C	UBP5	IME4-independent	No change
chr05:460342-460369;-	201.266	-1.12357	1.32922	0.710026	0.399435	0.465249	YER145C	FTR1	IME4-independent	No change
chr05:464916-465101;+	296.883	0.725845	0.266254	7.41704	0.0064609	0.0117115	YER148W	SPT15	IME4-independent	No change
chr05:465118-465180;+	205.615	0.690495	0.332757	4.30122	0.0380851	0.0576594	YER148W	SPT15	IME4-independent	No change
chr05:469124-469247;-	297.572	-1.29385	0.23623	32.505	1.18884e-08	6.03445e-08	YER151C	UBP3	IME4-independent	No change
chr05:475658-475813;-	265.56	-0.275231	0.35154	0.613872	0.433334	0.499176	YER155C	BEM2	IME4-independent	No change
chr05:478245-478341;-	264.785	-3.52212	0.506623	64.2466	1.09779e-15	1.25162e-14	YER155C	BEM2	IME4-dependent	Binding Down
chr05:478841-478892;-	220.715	-2.63364	0.485401	35.3491	2.75598e-09	1.55022e-08	YER155C	BEM2	IME4-dependent	Binding Down
chr05:479091-479167;-	218.333	-3.38428	0.565216	49.8974	1.61997e-12	1.35909e-11	YER155C	BEM2	IME4-dependent	Binding Down
chr05:487861-487904;-	952	-5.87788	0.337533	323.071	3.10415e-72	5.01913e-70	YER158C	YER158C	IME4-dependent	Binding Down
chr05:503568-503613;+	448.915	0.462188	0.28379	2.64775	0.103696	0.141568	YER165W	PAB1	IME4-independent	No change
chr05:503632-503659;+	359.061	1.35465	0.431871	10.2494	0.00136726	0.00286905	YER165W	PAB1	IME4-independent	No change
chr05:503797-503912;+	512.102	1.28019	0.262126	24.4141	7.76967e-07	3.01202e-06	YER165W	PAB1	IME4-independent	No change
chr05:505424-505563;+	669.44	0.297853	0.236944	1.57285	0.209794	0.265202	YER165W	PAB1	IME4-independent	No change
chr05:514007-514101;+	342.981	-4.18681	0.3781	180.523	3.72602e-41	1.83069e-39	YER167W	BCK2	IME4-dependent	Binding Down
chr05:538393-538485;+	323.319	-1.15792	0.231587	25.7483	3.88967e-07	1.58238e-06	YER176W	ECM32	IME4-independent	No change
chr05:539586-539654;+	1248.55	-1.39758	0.513884	7.36054	0.00666709	0.0120387	YER177W	BMH1	IME4-independent	No change
chr05:539826-539864;+	831.753	1.19845	0.217586	30.4832	3.3677e-08	1.61043e-07	YER177W	BMH1	IME4-independent	No change
chr05:540117-540210;+	632.969	1.79419	0.267056	47.0947	6.76394e-12	5.32788e-11	YER178W	PDA1	IME4-independent	No change
chr05:540527-540585;+	580.098	2.34242	0.346084	51.799	6.14843e-13	5.38169e-12	YER178W	PDA1	IME4-independent	Binding Up
chr05:540809-540901;+	672.447	2.34753	0.267713	85.1536	2.76061e-20	4.46424e-19	YER178W	PDA1	IME4-independent	Binding Up
chr05:541074-541133;+	571.455	1.94384	0.341762	34.4439	4.38723e-09	2.40392e-08	YER178W	PDA1	IME4-independent	No change
chr05:541202-541241;+	569.924	2.15394	0.352266	41.0447	1.48785e-10	9.97095e-10	YER178W	PDA1	IME4-independent	Binding Up
chr05:541274-541346;+	606.602	1.48347	0.28174	28.0821	1.16273e-07	5.10375e-07	YER178W	PDA1	IME4-independent	No change
chr05:541411-541458;+	597.658	1.88357	0.304661	40.3207	2.15514e-10	1.40305e-09	YER178W	PDA1	IME4-independent	No change
chr05:541484-541513;+	531.698	1.6066	0.425172	14.6183	0.000131629	0.000342175	YER178W	PDA1	IME4-independent	No change
chr05:541778-541850;+	1419.86	1.80146	0.487545	13.4887	0.00024001	0.000589128	YER179W	DMC1	IME4-independent	No change
chr05:542179-542211;+	1403.34	2.01115	0.366563	29.8556	4.65448e-08	2.18199e-07	YER179W	DMC1	IME4-independent	Binding Up
chr05:542217-542241;+	1372.34	1.78433	0.271354	43.0274	5.39779e-11	3.81579e-10	YER179W	DMC1	IME4-independent	No change
chr05:542481-542511;+	1325.62	1.50702	0.29355	26.0814	3.27326e-07	1.34764e-06	YER179W	DMC1	IME4-independent	No change
chr05:542598-542688;+	1599.46	1.40992	0.294876	22.7087	1.88511e-06	6.87344e-06	YER179W	DMC1	IME4-independent	No change
chr05:542749-542865;+	1926.72	0.52637	0.318226	2.72692	0.0986696	0.135391	YER179W	DMC1	IME4-independent	No change
chr06:52498-52602;+	263.751	-2.61129	0.317092	85.1863	2.71535e-20	4.42264e-19	YFL049W	SWP82	IME4-dependent	Binding Down
chr06:57536-57611;-	465.001	-0.677279	0.222738	9.49049	0.0020654	0.00416972	YFL045C	SEC53	IME4-independent	No change
chr06:57616-57669;-	382.479	0.196326	0.272138	0.52078	0.470509	0.53596	YFL045C	SEC53	IME4-independent	No change
chr06:63500-63531;+	327.408	2.62885	0.482023	33.5305	7.01556e-09	3.70703e-08	YFL041W	FET5	IME4-independent	Binding Up
chr06:63755-63816;+	334.706	2.38308	0.442656	31.3723	2.12994e-08	1.04592e-07	YFL041W	FET5	IME4-independent	Binding Up
chr06:64614-64718;+	324.413	2.39815	0.475923	27.6272	1.47099e-07	6.37812e-07	YFL041W	FET5	IME4-independent	Binding Up
chr06:64818-64923;+	332.24	1.15648	0.413468	7.62782	0.00574747	0.0105451	YFL041W	FET5	IME4-independent	No change
chr06:65112-65197;+	362.941	2.07381	0.372061	32.1742	1.4095e-08	7.09378e-08	YFL041W	FET5	IME4-independent	Binding Up
chr06:67224-67297;-	656.091	0.576834	0.253078	5.19308	0.022677	0.0361928	YFL039C	ACT1	IME4-independent	No change
chr06:67435-67722;-	884.173	1.16601	0.331955	12.3351	0.000444525	0.00103459	YFL039C	ACT1	IME4-independent	No change
chr06:68301-68398;-	546.788	0.669	0.291926	5.28495	0.0215105	0.0345607	YFL039C	ACT1	IME4-independent	No change
chr06:68753-68799;-	475.351	1.14656	0.352922	10.8406	0.000992974	0.00214177	YFL039C	ACT1	IME4-independent	No change
chr06:69325-69376;-	270.593	-0.715379	0.33469	4.77644	0.0288517	0.0448641	YFL038C	YPT1	IME4-independent	No change
chr06:69380-69439;-	308.922	0.249889	0.277899	0.806384	0.369191	0.435072	YFL038C	YPT1	IME4-independent	No change
chr06:69909-69960;-	231.366	1.42368	0.392223	13.7603	0.000207675	0.000515018	YFL038C	YPT1	IME4-independent	No change
chr06:70372-70399;+	510.307	2.30069	0.498428	22.3046	2.32643e-06	8.37611e-06	YFL037W	TUB2	IME4-independent	Binding Up
chr06:71365-71399;+	485.791	-0.445909	0.413674	1.20621	0.272083	0.333054	YFL037W	TUB2	IME4-independent	No change
chr06:71733-71792;+	586.241	0.751315	0.273284	7.46465	0.00629223	0.0114572	YFL037W	TUB2	IME4-independent	No change
chr06:71828-71954;+	772.605	0.902138	0.397157	5.12328	0.023607	0.0375155	YFL037W	TUB2	IME4-independent	No change
chr06:72314-72369;+	309.014	2.56651	0.397673	43.6989	3.82985e-11	2.76451e-10	YFL036W	RPO41	IME4-independent	Binding Up
chr06:72734-72769;+	362.148	2.17489	0.331667	43.3984	4.46542e-11	3.19734e-10	YFL036W	RPO41	IME4-independent	Binding Up
chr06:72899-72926;+	272.993	2.02176	0.459218	19.2623	1.13932e-05	3.64199e-05	YFL036W	RPO41	IME4-independent	Binding Up
chr06:73050-73094;+	374.513	2.25224	0.630751	12.5674	0.000392543	0.000924458	YFL036W	RPO41	IME4-independent	Binding Up
chr06:73161-73183;+	276.402	2.95	0.501749	38.8105	4.67e-10	2.90256e-09	YFL036W	RPO41	IME4-independent	Binding Up
chr06:73328-73399;+	337.891	-0.685059	0.408896	2.99252	0.0836499	0.116763	YFL036W	RPO41	IME4-independent	No change
chr06:76811-76858;+	292.729	1.23953	0.395717	9.38557	0.002187	0.0043893	YFL036W	RPO41	IME4-independent	No change
chr06:76871-76931;+	478.725	1.94102	0.36116	28.6268	8.77574e-08	3.93221e-07	YFL036W	RPO41	IME4-independent	No change
chr06:76952-77020;-	415.768	-6.25459	0.418462	387.644	2.69638e-86	6.66081e-84	YFL034C-B	MOB2	IME4-dependent	Binding Down
chr06:82933-83108;-	315.359	-0.747971	0.276504	7.39429	0.00654312	0.0118437	YFL033C	RIM15	IME4-independent	No change
chr06:89726-89756;+	365.741	0.208043	0.282411	0.543985	0.460786	0.526232	YFL031W	HAC1	IME4-independent	No change
chr06:89915-89957;+	657.091	-0.0136934	0.250391	0.00299516	0.956355	0.964817	YFL031W	HAC1	IME4-independent	No change
chr06:91050-91093;+	397.56	1.00782	0.379049	7.10782	0.00767482	0.0136178	YFL030W	AGX1	IME4-independent	No change
chr06:91715-91751;+	342.708	1.12547	0.443903	6.47367	0.0109484	0.0188071	YFL030W	AGX1	IME4-independent	No change
chr06:91821-91879;+	428.593	0.730849	0.812401	0.809445	0.368284	0.434255	YFL030W	AGX1	IME4-independent	No change
chr06:101488-101533;-	1390.89	-3.49135	0.330138	111.825	3.90267e-26	9.20596e-25	YFL024C	EPL1	IME4-dependent	Binding Down
chr06:101898-101924;-	3955.59	-5.99948	0.36095	284.611	7.42742e-64	9.43601e-62	YFL024C	EPL1	IME4-dependent	Binding Down
chr06:111340-111470;+	284.72	-0.576137	0.262533	4.83275	0.027924	0.0435434	YFL021W	GAT1	IME4-independent	No change
chr06:111554-111639;+	255.871	-0.369457	0.264645	1.95072	0.162509	0.211455	YFL021W	GAT1	IME4-independent	No change
chr06:115609-115649;-	464.742	0.32211	0.374969	0.722887	0.395199	0.460797	YFL018C	LPD1	IME4-independent	No change
chr06:115822-115888;-	465.684	1.59571	0.38061	17.6687	2.62916e-05	7.83551e-05	YFL018C	LPD1	IME4-independent	No change
chr06:116953-117024;-	474.407	2.28943	0.379212	40.089	2.4265e-10	1.57051e-09	YFL018C	LPD1	IME4-independent	Binding Up
chr06:117189-117242;-	439.514	1.51789	0.459657	10.8902	0.000966734	0.00208923	YFL018C	LPD1	IME4-independent	No change
chr06:121551-121595;+	1154.48	0.584609	0.299274	3.8148	0.0508015	0.0748597	YFL014W	HSP12	IME4-independent	No change
chr06:121614-121747;+	3133.76	1.00688	0.408119	6.05845	0.0138399	0.0232443	YFL014W	HSP12	IME4-independent	No change
chr06:121748-121774;+	943.434	1.35663	0.5287	6.54066	0.0105436	0.0181475	YFL014W	HSP12	IME4-independent	No change
chr06:132814-132898;+	265.55	-0.912891	0.27188	11.8377	0.000580441	0.00131882	YFL009W	CDC4	IME4-independent	No change
chr06:133992-134039;+	415.009	0.52521	0.656237	0.639315	0.423959	0.490218	YFL008W	SMC1	IME4-independent	No change
chr06:136725-136747;+	424.668	-7.13254	1.21037	116.956	2.93495e-27	7.41492e-26	YFL008W	SMC1	IME4-dependent	Binding Down
chr06:136951-137005;+	403.161	-4.36163	0.663599	70.9991	3.57379e-17	4.60605e-16	YFL008W	SMC1	IME4-dependent	Binding Down
chr06:137189-137242;+	442.064	-1.91786	0.37637	27.5652	1.5189e-07	6.56984e-07	YFL008W	SMC1	IME4-independent	No change
chr06:137255-137278;+	340.823	-2.34293	0.563706	20.6976	5.37844e-06	1.80833e-05	YFL008W	SMC1	IME4-dependent	Binding Down
chr06:137420-137465;+	364.167	-1.60689	0.435379	14.6964	0.000126287	0.00032983	YFL008W	SMC1	IME4-independent	No change
chr06:137932-137974;+	480.741	1.59677	0.400214	16.5396	4.76444e-05	0.000135671	YFL007W	BLM10	IME4-independent	No change
chr06:139582-139641;+	394.018	0.676249	0.404196	2.8479	0.0914933	0.126559	YFL007W	BLM10	IME4-independent	No change
chr06:139975-140028;+	389.184	-0.145406	0.391499	0.137947	0.710331	0.760897	YFL007W	BLM10	IME4-independent	No change
chr06:140096-140140;+	373.357	-2.60275	0.574972	27.7863	1.35482e-07	5.89454e-07	YFL007W	BLM10	IME4-dependent	Binding Down
chr06:140155-140245;+	565.014	-3.61689	0.380451	133.162	8.33147e-31	2.52013e-29	YFL007W	BLM10	IME4-dependent	Binding Down
chr06:141300-141405;+	440.306	-1.99834	0.366562	34.3541	4.5942e-09	2.51114e-08	YFL007W	BLM10	IME4-independent	No change
chr06:143024-143063;+	368.522	0.749325	0.482824	2.47087	0.115974	0.156034	YFL007W	BLM10	IME4-independent	No change
chr06:144252-144313;+	411.218	-1.41816	0.375911	15.4165	8.62302e-05	0.000234008	YFL007W	BLM10	IME4-independent	No change
chr06:144570-144705;+	288.544	1.50203	0.346107	18.9766	1.32331e-05	4.17311e-05	YFL005W	SEC4	IME4-independent	No change
chr06:144735-144783;+	249.667	1.68221	0.437449	15.0589	0.000104208	0.000276716	YFL005W	SEC4	IME4-independent	No change
chr06:144799-144858;+	295.575	1.52607	0.341077	20.182	7.04116e-06	2.32518e-05	YFL005W	SEC4	IME4-independent	No change
chr06:145042-145113;+	250.987	1.77497	0.430386	17.4962	2.87889e-05	8.52546e-05	YFL005W	SEC4	IME4-independent	No change
chr06:145263-145296;+	226.342	2.25858	0.570569	17.2038	3.3577e-05	9.81386e-05	YFL005W	SEC4	IME4-independent	Binding Up
chr06:148633-148697;+	244.738	1.41322	0.541249	7.09842	0.0077152	0.0136812	YFL004W	VTC2	IME4-independent	No change
chr06:148743-148932;-	640.696	1.93936	0.286608	43.9807	3.31622e-11	2.42128e-10	YFL003C	MSH4	IME4-independent	No change
chr06:149772-149830;-	545.816	1.91382	0.410868	20.2097	6.93986e-06	2.29684e-05	YFL003C	MSH4	IME4-independent	No change
chr06:149959-150014;-	555.945	-0.311066	0.479545	0.43822	0.507983	0.573213	YFL003C	MSH4	IME4-independent	No change
chr06:150817-150896;-	620.644	-0.102145	0.3676	0.0777412	0.780382	0.819452	YFL003C	MSH4	IME4-independent	No change
chr06:151010-151056;-	522.874	0.610941	0.528719	1.25625	0.262362	0.323156	YFL003C	MSH4	IME4-independent	No change
chr06:151193-151262;-	549.176	1.21938	0.404431	8.40695	0.00373789	0.00710583	YFL003C	MSH4	IME4-independent	No change
chr06:167865-167962;+	252.948	2.90245	0.386335	61.5661	4.28129e-15	4.56517e-14	YFR004W	RPN11	IME4-independent	Binding Up
chr06:168480-168538;+	230.897	0.827459	0.413974	3.78548	0.0516991	0.0760815	YFR004W	RPN11	IME4-independent	No change
chr06:168557-168607;+	226.71	1.70816	0.413823	16.2979	5.41237e-05	0.00015251	YFR004W	RPN11	IME4-independent	No change
chr06:168613-168662;+	224.882	2.25278	0.42663	27.8998	1.27762e-07	5.58598e-07	YFR004W	RPN11	IME4-independent	Binding Up
chr06:179382-179433;+	224.471	0.375113	0.441664	0.698171	0.403399	0.469313	YFR010W	UBP6	IME4-independent	No change
chr06:179496-179595;+	214.24	1.38511	0.45934	8.58491	0.0033896	0.00651052	YFR010W	UBP6	IME4-independent	No change
chr06:179671-179799;+	232.682	2.66514	0.429991	41.1738	1.3928e-10	9.36216e-10	YFR010W	UBP6	IME4-independent	Binding Up
chr06:186743-186767;-	216.159	-4.536	0.536251	122.899	1.46741e-28	3.91883e-27	YFR014C	CMK1	IME4-dependent	Binding Down
chr06:189910-189949;-	211.405	1.3312	0.431661	10.2691	0.00135276	0.00284332	YFR015C	GSY1	IME4-independent	No change
chr06:196880-196976;-	647.094	-1.30669	0.195043	47.5248	5.43128e-12	4.32412e-11	YFR017C	IGD1	IME4-independent	No change
chr06:216445-216503;-	272.343	-1.18292	0.315314	14.6463	0.000129691	0.000337628	YFR024C-A	LSB3	IME4-independent	No change
chr06:238853-238902;-	835.426	-0.494482	0.229912	4.74079	0.0294555	0.0457151	YFR033C	QCR6	IME4-independent	No change
chr06:239006-239043;-	729.666	0.771485	0.33468	5.30087	0.0213148	0.034271	YFR033C	QCR6	IME4-independent	No change
chr06:240980-241099;+	336.284	-3.13405	0.286215	134.735	3.77381e-31	1.1653e-29	Unit4321	Unit4321	IME4-dependent	Binding Down
chr06:241251-241273;-	393.367	1.49463	0.417303	12.8699	0.000333901	0.000798434	YFR035C	YFR035C	IME4-independent	No change
chr06:251562-251587;+	234.398	-4.56778	0.694712	83.1865	7.46645e-20	1.17313e-18	YFR040W	SAP155	IME4-dependent	Binding Down
chr06:251591-251627;+	357.835	-4.23256	0.42794	141.392	1.3209e-32	4.31867e-31	YFR040W	SAP155	IME4-dependent	Binding Down
chr06:251632-251663;+	286.655	-2.43285	0.366964	48.9784	2.58791e-12	2.11918e-11	YFR040W	SAP155	IME4-dependent	Binding Down
chr06:251679-251706;+	280.014	-0.769273	0.311466	6.08297	0.0136491	0.0229716	YFR040W	SAP155	IME4-independent	No change
chr06:258833-258889;-	217.295	-4.03051	0.450953	141.724	1.11742e-32	3.69413e-31	YFR047C	BNA6	IME4-dependent	Binding Down
chr06:263040-263156;+	321.028	2.38135	0.284426	80.7797	2.52336e-19	3.81636e-18	YFR049W	YMR31	IME4-independent	Binding Up
chr06:263342-263398;+	248.706	2.16138	0.367483	38.6207	5.14702e-10	3.16326e-09	YFR049W	YMR31	IME4-independent	Binding Up
chr06:263434-263499;+	314.414	1.71454	0.277105	39.9313	2.63055e-10	1.68784e-09	YFR049W	YMR31	IME4-independent	No change
chr06:263444-263548;-	668.49	1.44712	0.232179	38.6286	5.12625e-10	3.15268e-09	YFR050C	PRE4	IME4-independent	No change
chr06:263587-263635;-	469.223	-0.74357	0.314704	6.10616	0.0134712	0.0226935	YFR050C	PRE4	IME4-independent	No change
chr06:263850-263904;-	463.838	1.17789	0.264395	19.0768	1.2556e-05	3.97369e-05	YFR050C	PRE4	IME4-independent	No change
chr06:264619-264736;-	274.176	-3.33589	0.329958	134.619	4.00087e-31	1.23113e-29	YFR051C	RET2	IME4-dependent	Binding Down
chr06:267576-267616;+	277.598	1.80338	0.431256	17.1109	3.52594e-05	0.000102807	YFR052W	RPN12	IME4-independent	No change
chr06:267776-267895;+	410.209	0.707704	0.255516	7.41014	0.00648572	0.0117493	YFR052W	RPN12	IME4-independent	No change
chr06:268382-268412;-	410.305	-0.847516	0.305522	8.14856	0.00430953	0.00807685	YFR053C	HXK1	IME4-independent	No change
chr06:268422-268496;-	591.046	-2.28261	0.301644	66.2259	4.0209e-16	4.76772e-15	YFR053C	HXK1	IME4-dependent	Binding Down
chr06:269345-269392;-	398.894	1.54273	0.328184	23.5411	1.22271e-06	4.60159e-06	YFR053C	HXK1	IME4-independent	No change
chr06:279692-279723;+	232.183	0.803152	0.273117	8.8267	0.00296855	0.00578551	YFR055W	YFR055W	IME4-independent	No change
chr06:279734-279776;+	388.267	0.17307	0.225798	0.588866	0.442858	0.508551	YFR055W	YFR055W	IME4-independent	No change
chr06:279866-280004;+	902.8	-0.800334	0.196337	16.6528	4.48836e-05	0.000128427	YFR055W	YFR055W	IME4-independent	No change
chr07:21370-21436;+	527.474	-2.98767	0.685838	18.4162	1.77539e-05	5.47643e-05	YGL255W	ZRT1	IME4-dependent	Binding Down
chr07:21559-21601;+	407.018	-1.0839	0.417368	6.73827	0.00943659	0.0164162	YGL255W	ZRT1	IME4-independent	No change
chr07:27171-27204;-	482.817	-0.618571	0.462332	1.89741	0.168368	0.218135	YGL251C	HFM1	IME4-independent	No change
chr07:27212-27241;-	473.466	0.207966	0.427921	0.232654	0.629563	0.68662	YGL251C	HFM1	IME4-independent	No change
chr07:27277-27338;-	634.251	-1.43605	0.34869	19.0591	1.2673e-05	4.00787e-05	YGL251C	HFM1	IME4-independent	No change
chr07:28672-28736;-	489.279	-1.58839	0.534745	11.0153	0.000903636	0.00196637	YGL251C	HFM1	IME4-independent	No change
chr07:30821-30884;-	499.535	-0.674196	0.429402	2.621	0.105458	0.143664	YGL251C	HFM1	IME4-independent	No change
chr07:49095-49136;+	267.654	1.4368	0.469842	9.12245	0.00252491	0.00501097	YGL238W	CSE1	IME4-independent	No change
chr07:50342-50445;+	290.245	0.686986	0.406623	2.74814	0.0973678	0.133894	YGL238W	CSE1	IME4-independent	No change
chr07:50637-50672;+	258.558	2.65664	0.585567	23.2604	1.41485e-06	5.28222e-06	YGL238W	CSE1	IME4-independent	Binding Up
chr07:50870-50980;+	289.02	2.36897	0.426743	33.0341	9.05559e-09	4.69844e-08	YGL238W	CSE1	IME4-independent	Binding Up
chr07:68791-68833;+	444.993	0.562694	0.246009	5.16587	0.0230349	0.036685	YGL228W	SHE10	IME4-independent	No change
chr07:69986-70041;+	226.63	-3.52033	0.544121	72.6797	1.52496e-17	2.0241e-16	YGL227W	VID30	IME4-dependent	Binding Down
chr07:88159-88309;+	246.451	-1.86968	0.272353	51.1333	8.63013e-13	7.4296e-12	YGL220W	YGL220W	IME4-independent	No change
chr07:92340-92367;+	213.56	-3.88395	0.635847	67.4088	2.20662e-16	2.68815e-15	YGL216W	KIP3	IME4-dependent	Binding Down
chr07:93026-93077;+	332.25	1.76472	0.471496	15.0765	0.000103239	0.000274389	YGL215W	CLG1	IME4-independent	No change
chr07:93314-93367;+	365.706	1.06143	0.391749	7.46394	0.0062947	0.0114583	YGL215W	CLG1	IME4-independent	No change
chr07:93578-93665;+	438.47	1.11717	0.347256	10.454	0.00122382	0.00260057	YGL215W	CLG1	IME4-independent	No change
chr07:94516-94582;+	354.929	0.474004	0.398957	1.41779	0.233768	0.292021	YGL215W	CLG1	IME4-independent	No change
chr07:94595-94644;+	380.134	-0.21526	0.385461	0.311368	0.576842	0.638597	YGL215W	CLG1	IME4-independent	No change
chr07:94752-94857;+	542.475	-0.653719	0.32268	4.12626	0.0422225	0.0632662	YGL215W	CLG1	IME4-independent	No change
chr07:94991-95055;+	456.389	-0.847826	0.341931	6.24065	0.0124851	0.0212147	YGL215W	CLG1	IME4-independent	No change
chr07:107482-107528;+	803.622	-5.40948	0.289926	727.848	2.63149e-160	7.80062e-157	YGL207W	SPT16	IME4-dependent	Binding Down
chr07:107617-107675;+	475.552	-5.49273	0.405462	450.829	4.76089e-100	2.01613e-97	YGL207W	SPT16	IME4-dependent	Binding Down
chr07:107726-107916;-	2306.15	-4.35112	0.254129	286.926	2.32475e-64	3.08568e-62	YGL206C	CHC1	IME4-dependent	Binding Down
chr07:113456-113542;+	763.794	-0.150665	0.315971	0.227357	0.633491	0.690481	YGL205W	POX1	IME4-independent	No change
chr07:113548-113613;+	715.394	0.0616066	0.290872	0.0447483	0.832468	0.861932	YGL205W	POX1	IME4-independent	No change
chr07:114471-114521;+	652.79	2.1743	0.416189	30.7601	2.9198e-08	1.4066e-07	YGL205W	POX1	IME4-independent	Binding Up
chr07:115806-116000;+	1175.89	1.06602	0.264967	16.1236	5.93399e-05	0.000165894	YGL205W	POX1	IME4-independent	No change
chr07:123186-123278;-	339.067	-0.0767108	0.22553	0.115576	0.733883	0.779647	YGL201C	MCM6	IME4-independent	No change
chr07:123881-123903;-	222.241	1.90426	0.371905	29.9835	4.35743e-08	2.05247e-07	YGL201C	MCM6	IME4-independent	No change
chr07:126108-126156;-	300.514	1.63882	0.638592	6.55137	0.0104804	0.0180519	YGL201C	MCM6	IME4-independent	No change
chr07:126196-126234;-	234.982	0.622194	0.291919	4.59828	0.032004	0.0492749	YGL201C	MCM6	IME4-independent	No change
chr07:130053-130099;+	216.593	-2.78648	0.539003	34.5844	4.08174e-09	2.24622e-08	YGL197W	MDS3	IME4-dependent	Binding Down
chr07:130115-130213;+	262.799	-1.04105	0.355069	8.79071	0.00302768	0.00588529	YGL197W	MDS3	IME4-independent	No change
chr07:130423-130495;+	210.486	-0.15809	0.437325	0.130215	0.718209	0.767089	YGL197W	MDS3	IME4-independent	No change
chr07:130565-130599;+	220.663	-4.03628	0.699547	59.2881	1.36195e-14	1.38579e-13	YGL197W	MDS3	IME4-dependent	Binding Down
chr07:131486-131553;+	215.287	0.275997	0.425977	0.422656	0.515615	0.580352	YGL197W	MDS3	IME4-independent	No change
chr07:131986-132057;+	231.348	-1.61105	0.41719	15.9993	6.33658e-05	0.000176263	YGL197W	MDS3	IME4-independent	No change
chr07:134268-134332;+	222.463	-1.1778	0.410267	8.56337	0.00342993	0.00657504	YGL197W	MDS3	IME4-independent	No change
chr07:134837-134916;+	254.047	0.32657	0.411692	0.631225	0.426906	0.492985	YGL197W	MDS3	IME4-independent	No change
chr07:135084-135127;+	210.881	-0.122353	0.42784	0.0817761	0.774905	0.814855	YGL197W	MDS3	IME4-independent	No change
chr07:150587-150664;+	994.489	0.108116	0.385735	0.078756	0.77899	0.818474	YGL191W	COX13	IME4-independent	No change
chr07:150689-150873;+	1491.27	1.15818	0.185603	38.9459	4.35713e-10	2.71725e-09	YGL191W	COX13	IME4-independent	No change
chr07:155043-155092;-	859.238	-2.08883	0.236706	88.0564	6.36137e-21	1.09423e-19	YGL187C	COX4	IME4-dependent	Binding Down
chr07:161533-161572;-	421.88	1.92182	0.323112	34.6539	3.9384e-09	2.17002e-08	YGL183C	MND1	IME4-independent	No change
chr07:161788-161882;-	734.933	1.86698	0.379596	23.9142	1.00726e-06	3.8527e-06	YGL183C	MND1	IME4-independent	No change
chr07:161895-161927;-	431.919	1.62737	0.311669	26.4559	2.69629e-07	1.12521e-06	YGL183C	MND1	IME4-independent	No change
chr07:165194-165308;+	637.238	1.7989	0.283868	40.4116	2.05718e-10	1.34124e-09	YGL180W	ATG1	IME4-independent	No change
chr07:167216-167251;+	328.079	1.19254	0.448462	7.07135	0.00783263	0.0138756	YGL180W	ATG1	IME4-independent	No change
chr07:167265-167301;+	340.225	2.10273	0.463589	21.9857	2.74685e-06	9.70958e-06	YGL180W	ATG1	IME4-independent	Binding Up
chr07:167970-168033;+	402.875	-0.0825363	0.346096	0.056914	0.811442	0.844983	YGL180W	ATG1	IME4-independent	No change
chr07:168250-168305;+	431.156	2.19188	0.358123	39.0497	4.13155e-10	2.58563e-09	YGL180W	ATG1	IME4-independent	Binding Up
chr07:168347-168406;+	390.132	1.69909	0.360537	22.7245	1.8697e-06	6.82282e-06	YGL180W	ATG1	IME4-independent	No change
chr07:168473-168531;+	388.524	1.96992	0.401612	24.8334	6.25044e-07	2.46388e-06	YGL180W	ATG1	IME4-independent	No change
chr07:174238-174330;+	596.886	-2.48128	0.361701	48.2001	3.84874e-12	3.12004e-11	YGL178W	MPT5	IME4-dependent	Binding Down
chr07:174364-174386;+	244.536	-5.85656	1.88636	9.77087	0.00177299	0.00363048	YGL178W	MPT5	IME4-independent	No change
chr07:174960-175036;+	311.597	-3.28695	0.474323	59.6877	1.1117e-14	1.13898e-13	YGL178W	MPT5	IME4-dependent	Binding Down
chr07:176096-176143;+	250.758	0.637436	0.377442	2.8543	0.09113	0.126127	YGL178W	MPT5	IME4-independent	No change
chr07:181206-181277;-	258.672	0.893499	0.433894	4.3523	0.036959	0.056136	YGL173C	XRN1	IME4-independent	No change
chr07:182303-182348;-	230.128	0.95145	0.556217	3.02707	0.0818856	0.114606	YGL173C	XRN1	IME4-independent	No change
chr07:183193-183236;-	247.478	-1.78264	0.525789	13.2996	0.000265463	0.000647494	YGL173C	XRN1	IME4-independent	No change
chr07:183852-183921;-	249.22	0.564713	0.459838	1.51766	0.217974	0.274529	YGL173C	XRN1	IME4-independent	No change
chr07:184977-185015;-	222.66	-1.24992	0.629019	4.30728	0.0379495	0.0574736	YGL173C	XRN1	IME4-independent	No change
chr07:185583-185745;-	527.24	-0.978986	0.271054	13.1945	0.000280765	0.000681825	YGL173C	XRN1	IME4-independent	No change
chr07:185818-185854;-	248.907	1.96849	0.557011	14.4362	0.000144991	0.000373632	YGL173C	XRN1	IME4-independent	No change
chr07:187394-187494;+	235.987	1.84745	0.259486	54.5462	1.51836e-13	1.41242e-12	YGL172W	NUP49	IME4-independent	No change
chr07:192860-192941;-	334.061	-3.69064	0.35458	118.37	1.43862e-27	3.68694e-26	YGL167C	PMR1	IME4-dependent	Binding Down
chr07:192959-193009;-	252.061	-2.38479	0.363005	44.0452	3.20874e-11	2.35052e-10	YGL167C	PMR1	IME4-dependent	Binding Down
chr07:197214-197273;+	284.624	-1.56034	0.313813	25.4347	4.57614e-07	1.8431e-06	YGL166W	YGL166W	IME4-independent	No change
chr07:216449-216482;+	378.083	2.24956	0.671867	13.9868	0.000184101	0.000462488	YGL156W	AMS1	IME4-independent	Binding Up
chr07:216999-217091;+	419.495	0.957214	0.389575	6.18802	0.0128618	0.0217742	YGL156W	AMS1	IME4-independent	No change
chr07:219045-219106;+	461.45	0.850334	0.31386	7.4625	0.00629975	0.0114638	YGL156W	AMS1	IME4-independent	No change
chr07:244473-244573;+	205.326	2.83092	0.366929	79.4083	5.0514e-19	7.35222e-18	YGL141W	HUL5	IME4-independent	Binding Up
chr07:253706-253778;+	218.526	-0.230964	0.353754	0.427972	0.512986	0.578125	YGL139W	FLC3	IME4-independent	No change
chr07:257883-257905;+	228.63	0.387949	0.291838	1.79125	0.180774	0.232283	YGL137W	SEC27	IME4-independent	No change
chr07:275710-275826;-	232.544	-1.60276	0.264174	41.7137	1.05666e-10	7.20617e-10	YGL127C	SOH1	IME4-independent	No change
chr07:277582-277702;+	673.859	-2.0856	0.273579	58.7871	1.75685e-14	1.76738e-13	YGL126W	SCS3	IME4-dependent	Binding Down
chr07:279712-279765;+	242.923	-3.36471	0.382131	123.106	1.32197e-28	3.55174e-27	YGL125W	MET13	IME4-dependent	Binding Down
chr07:284292-284354;-	289.335	1.38095	0.301591	21.2666	3.99628e-06	1.37481e-05	YGL122C	NAB2	IME4-independent	No change
chr07:286001-286176;-	400.374	0.0415709	0.408435	0.0103926	0.918801	0.934778	YGL121C	GPG1	IME4-independent	No change
chr07:294574-294724;+	246.649	-0.987275	0.248737	15.8546	6.83983e-05	0.000189254	YGL117W	YGL117W	IME4-independent	No change
chr07:313913-314031;-	882.861	-5.49687	0.268188	553.06	2.7186e-122	2.19786e-119	YGL104C	VPS73	IME4-dependent	Binding Down
chr07:314063-314118;-	300.753	-5.91607	0.458251	418.711	4.65558e-93	1.47865e-90	YGL104C	VPS73	IME4-dependent	Binding Down
chr07:327817-327904;+	229.034	-2.36317	0.382801	53.8468	2.16745e-13	1.98508e-12	YGL097W	SRM1	IME4-dependent	Binding Down
chr07:328109-328295;+	288.905	-0.428835	0.239454	3.28821	0.0697793	0.0995104	YGL097W	SRM1	IME4-independent	No change
chr07:331450-331618;+	217.64	0.599355	0.286702	4.37168	0.0365409	0.0555949	YGL096W	TOS8	IME4-independent	No change
chr07:351662-351692;+	738.951	1.05279	0.407411	6.66146	0.00985202	0.0170522	snR10	snR10	IME4-independent	No change
chr07:353607-353663;+	201.106	-3.41895	0.584751	59.1309	1.47525e-14	1.49594e-13	YGL086W	YGL086W	IME4-dependent	Binding Down
chr07:363111-363205;+	436.169	2.74956	0.346433	63.0488	2.01651e-15	2.24161e-14	YGL081W	YGL081W	IME4-independent	Binding Up
chr07:364801-364918;+	399.531	1.32559	0.322933	16.8558	4.03306e-05	0.000116638	YGL080W	FMP37	IME4-independent	No change
chr07:370921-370944;-	237.733	1.02201	0.743418	1.88791	0.169438	0.219236	snR39	snR39	IME4-independent	No change
chr07:372276-372315;-	224.159	0.932386	0.330399	7.90492	0.00493004	0.00914536	YGL075C	MPS2	IME4-independent	No change
chr07:378966-379002;+	215.255	-4.01753	0.41484	133.251	7.96888e-31	2.41868e-29	YGL071W	AFT1	IME4-dependent	Binding Down
chr07:379799-379883;+	340.115	-2.85967	0.270214	126.519	2.36755e-29	6.55908e-28	YGL071W	AFT1	IME4-dependent	Binding Down
chr07:379919-379968;-	211.451	-3.234	0.403106	87.2289	9.66611e-21	1.64047e-19	YGL070C	RPB9	IME4-dependent	Binding Down
chr07:391763-391797;+	957.425	-1.06729	0.326096	10.8913	0.000966165	0.0020885	YGL062W	PYC1	IME4-independent	No change
chr07:392299-392330;+	974.408	-0.34941	0.306261	1.30442	0.253408	0.31343	YGL062W	PYC1	IME4-independent	No change
chr07:393137-393190;+	1020.03	0.863828	0.370683	5.43762	0.0197076	0.0319059	YGL062W	PYC1	IME4-independent	No change
chr07:394264-394290;+	1084.24	0.957239	0.308731	9.63221	0.00191194	0.00388461	YGL062W	PYC1	IME4-independent	No change
chr07:394302-394330;+	1083.24	0.666105	0.27246	5.99522	0.0143447	0.0240104	YGL062W	PYC1	IME4-independent	No change
chr07:394340-394399;+	1858.14	0.0881009	0.244021	0.130159	0.718267	0.767089	YGL062W	PYC1	IME4-independent	No change
chr07:394408-394458;+	1396.63	1.01117	0.266692	14.3777	0.000149565	0.000383595	YGL062W	PYC1	IME4-independent	No change
chr07:400078-400142;+	320.666	-2.32681	0.295983	81.1332	2.11006e-19	3.20766e-18	YGL058W	RAD6	IME4-dependent	Binding Down
chr07:400261-400371;+	389.549	-0.595598	0.204745	8.69481	0.00319118	0.00617207	YGL058W	RAD6	IME4-independent	No change
chr07:400420-400474;+	246.134	-1.99309	0.327787	44.6335	2.37595e-11	1.75784e-10	YGL058W	RAD6	IME4-independent	No change
chr07:401902-401948;-	213.968	1.62651	0.32557	25.1478	5.30998e-07	2.10811e-06	YGL056C	SDS23	IME4-independent	No change
chr07:401993-402030;-	202.703	-0.357103	0.369786	0.956045	0.328185	0.392859	YGL056C	SDS23	IME4-independent	No change
chr07:402035-402121;-	323.284	-0.380411	0.396419	0.927653	0.335474	0.400452	YGL056C	SDS23	IME4-independent	No change
chr07:405618-405676;+	2526.37	-2.34403	0.417519	30.7551	2.92728e-08	1.40944e-07	YGL055W	OLE1	IME4-dependent	Binding Down
chr07:405722-405771;+	3274.38	-3.7493	0.430067	71.6407	2.58171e-17	3.3517e-16	YGL055W	OLE1	IME4-dependent	Binding Down
chr07:405777-405836;+	3513.07	-3.11207	0.451029	45.5936	1.45515e-11	1.10793e-10	YGL055W	OLE1	IME4-dependent	Binding Down
chr07:406210-406383;-	311.798	1.60963	0.250083	42.4666	7.19014e-11	4.98767e-10	YGL054C	ERV14	IME4-independent	No change
chr07:406492-406577;-	262.172	0.412983	0.260877	2.47938	0.115348	0.155375	YGL054C	ERV14	IME4-independent	No change
chr07:412624-412755;-	477.259	2.62293	0.303912	79.8868	3.96494e-19	5.88652e-18	YGL048C	RPT6	IME4-independent	Binding Up
chr07:413224-413282;-	340.331	2.30043	0.433039	30.262	3.77458e-08	1.79026e-07	YGL048C	RPT6	IME4-independent	Binding Up
chr07:413488-413588;-	353.612	1.64815	0.383217	18.4813	1.71579e-05	5.30547e-05	YGL048C	RPT6	IME4-independent	No change
chr07:422263-422403;-	215.435	1.54142	0.322882	23.2176	1.44666e-06	5.39192e-06	YGL040C	HEM2	IME4-independent	No change
chr07:429200-429247;-	223.415	0.621864	0.29198	4.65002	0.0310532	0.0479105	YGL038C	OCH1	IME4-independent	No change
chr07:432187-432301;+	619.296	1.25749	0.322836	15.3047	9.14904e-05	0.000246927	YGL036W	YGL036W	IME4-independent	No change
chr07:433274-433310;+	370.5	0.429989	0.360189	1.43411	0.231095	0.289088	YGL036W	YGL036W	IME4-independent	No change
chr07:433960-434095;+	815.858	-2.22014	0.288469	59.8821	1.00713e-14	1.03782e-13	YGL036W	YGL036W	IME4-dependent	Binding Down
chr07:434157-434274;-	434.892	-5.44192	0.41141	260.341	1.44622e-58	1.42903e-56	YGL035C	MIG1	IME4-dependent	Binding Down
chr07:439011-439049;+	678.902	-2.03369	0.36588	41.2494	1.33996e-10	9.0275e-10	YGL033W	HOP2	IME4-dependent	Binding Down
chr07:458695-458736;-	689.236	-4.69069	0.365899	186.061	2.30229e-42	1.19037e-40	YGL023C	PIB2	IME4-dependent	Binding Down
chr07:461104-461143;+	202.04	0.74644	0.421507	3.19944	0.0736636	0.104447	YGL022W	STT3	IME4-independent	No change
chr07:462102-462175;+	220.58	-0.693063	0.377042	3.46848	0.0625486	0.0903435	YGL022W	STT3	IME4-independent	No change
chr07:462875-462943;+	200.261	0.802255	0.436296	3.45482	0.0630675	0.0909183	YGL022W	STT3	IME4-independent	No change
chr07:474342-474426;+	205.274	0.982352	0.304405	10.6441	0.00110422	0.00236053	YGL014W	PUF4	IME4-independent	No change
chr07:477164-477265;+	305.171	-1.87591	0.288838	47.2877	6.12962e-12	4.84109e-11	YGL014W	PUF4	IME4-independent	No change
chr07:477633-477725;-	290.798	-0.449502	0.257695	3.0769	0.0794117	0.111618	YGL013C	PDR1	IME4-independent	No change
chr07:478545-478669;-	272.195	-1.52423	0.294091	30.2907	3.71901e-08	1.76484e-07	YGL013C	PDR1	IME4-independent	No change
chr07:480881-480964;-	208.668	-2.57553	0.456569	45.107	1.86555e-11	1.40121e-10	YGL013C	PDR1	IME4-dependent	Binding Down
chr07:481965-482005;+	240.978	-2.56905	0.45391	46.3102	1.00937e-11	7.79872e-11	YGL012W	ERG4	IME4-dependent	Binding Down
chr07:482927-483048;-	408.339	1.26172	0.220934	32.1649	1.41628e-08	7.12388e-08	YGL011C	SCL1	IME4-independent	No change
chr07:483069-483104;-	260.449	1.31823	0.383243	11.6458	0.00064347	0.00145054	YGL011C	SCL1	IME4-independent	No change
chr07:483141-483180;-	270.653	1.38821	0.360841	14.6332	0.000130596	0.000339687	YGL011C	SCL1	IME4-independent	No change
chr07:483270-483311;-	259.951	2.17158	0.412296	29.943	4.44936e-08	2.09134e-07	YGL011C	SCL1	IME4-independent	Binding Up
chr07:483524-483596;-	330.07	1.48442	0.27451	29.1701	6.62935e-08	3.02177e-07	YGL011C	SCL1	IME4-independent	No change
chr07:483770-483808;-	289.672	2.04046	0.347367	36.4695	1.5507e-09	9.03105e-09	YGL011C	SCL1	IME4-independent	Binding Up
chr07:484557-484680;+	230.543	0.366199	0.256913	2.0098	0.156286	0.204209	YGL010W	YGL010W	IME4-independent	No change
chr07:484701-484729;-	2392.89	-4.18047	0.696487	52.1151	5.23414e-13	4.6132e-12	YGL009C	LEU1	IME4-dependent	Binding Down
chr07:484733-484793;-	2433.87	-1.12492	0.425969	6.99285	0.00818359	0.014457	YGL009C	LEU1	IME4-independent	No change
chr07:485216-485328;-	2444.44	-3.11679	0.479762	46.6298	8.57443e-12	6.66542e-11	YGL009C	LEU1	IME4-dependent	Binding Down
chr07:485432-485481;-	2387	-3.3528	0.621919	35.5824	2.44486e-09	1.3875e-08	YGL009C	LEU1	IME4-dependent	Binding Down
chr07:487957-487985;-	405.456	-0.940897	0.296748	10.2441	0.00137121	0.00287667	YGL008C	PMA1	IME4-independent	No change
chr07:487997-488103;-	1030.85	-1.18253	0.356284	10.9839	0.000919075	0.00199642	YGL008C	PMA1	IME4-independent	No change
chr07:488307-488367;-	575.961	-0.398239	0.356727	1.24946	0.263655	0.324389	YGL008C	PMA1	IME4-independent	No change
chr07:497926-498004;+	225.579	0.472074	0.285441	2.73648	0.0980806	0.134728	YGL006W	PMC1	IME4-independent	No change
chr07:516510-516608;-	1180.95	0.113119	0.288727	0.153656	0.695066	0.746795	YGR008C	STF2	IME4-independent	No change
chr07:529259-529368;+	451.995	-1.99698	0.374881	28.0879	1.15926e-07	5.09355e-07	YGR014W	MSB2	IME4-independent	No change
chr07:534941-535001;+	332.189	-0.324341	0.239176	1.82929	0.176212	0.227142	YGR019W	UGA1	IME4-independent	No change
chr07:535038-535073;+	441.122	0.121071	0.21929	0.305074	0.580719	0.64257	YGR019W	UGA1	IME4-independent	No change
chr07:539355-539433;+	607.424	-2.40631	0.252546	93.8194	3.45668e-22	6.3909e-21	YGR023W	MTL1	IME4-dependent	Binding Down
chr07:539469-539566;+	673.702	-1.11823	0.331889	11.3087	0.000771437	0.0017036	YGR023W	MTL1	IME4-independent	No change
chr07:542175-542209;+	328.874	-3.20192	0.36095	101.82	6.08166e-24	1.26365e-22	YGR026W	YGR026W	IME4-dependent	Binding Down
chr07:554134-554209;+	448.257	0.73518	0.406804	3.27039	0.070541	0.100387	snR46	snR46	IME4-independent	No change
chr07:557009-557046;+	712.056	-1.27162	0.5383	6.12936	0.0132955	0.0224486	YGR032W	GSC2	IME4-independent	No change
chr07:557343-557373;+	705.119	0.0655294	0.525632	0.0155103	0.900887	0.920344	YGR032W	GSC2	IME4-independent	No change
chr07:557500-557549;+	755.584	0.818956	0.424537	3.7241	0.0536327	0.0785759	YGR032W	GSC2	IME4-independent	No change
chr07:557648-557698;+	737.696	0.0492959	0.404669	0.0148376	0.90305	0.922292	YGR032W	GSC2	IME4-independent	No change
chr07:558469-558553;+	746.893	0.99251	0.424664	5.53908	0.0185964	0.0302502	YGR032W	GSC2	IME4-independent	No change
chr07:558789-558847;+	744.363	0.562408	0.414917	1.84236	0.174675	0.225357	YGR032W	GSC2	IME4-independent	No change
chr07:559543-559594;+	755.241	0.456525	0.376742	1.46916	0.225478	0.282938	YGR032W	GSC2	IME4-independent	No change
chr07:560951-560979;+	777.943	0.579034	0.362666	2.55242	0.110125	0.14929	YGR032W	GSC2	IME4-independent	No change
chr07:561401-561453;+	726.16	1.15098	0.457363	6.56866	0.010379	0.0178877	YGR032W	GSC2	IME4-independent	No change
chr07:561465-561494;+	709.055	1.60485	0.550868	9.29161	0.00230205	0.00460774	YGR032W	GSC2	IME4-independent	No change
chr07:561875-561909;+	732.986	-0.000901094	0.45003	4.01919e-06	0.9984	0.998932	YGR032W	GSC2	IME4-independent	No change
chr07:562092-562172;+	820.443	0.610863	0.314601	3.78224	0.0517992	0.0761531	YGR032W	GSC2	IME4-independent	No change
chr07:562393-562428;+	745.901	0.934892	0.421355	4.99067	0.0254844	0.0401617	YGR032W	GSC2	IME4-independent	No change
chr07:562497-562550;+	775.729	1.26844	0.363432	12.658	0.000373959	0.000884238	YGR032W	GSC2	IME4-independent	No change
chr07:562665-562715;+	759.095	-0.190367	0.366827	0.270645	0.602899	0.663417	YGR032W	GSC2	IME4-independent	No change
chr07:562720-562765;+	747.901	-0.515902	0.402494	1.66578	0.196825	0.250553	YGR032W	GSC2	IME4-independent	No change
chr07:568347-568391;-	1026.57	1.60103	0.252507	40.0158	2.51919e-10	1.62695e-09	YGR037C	ACB1	IME4-independent	No change
chr07:577679-577735;-	302.431	-2.50851	0.324318	64.1547	1.15023e-15	1.30306e-14	YGR043C	NQM1	IME4-dependent	Binding Down
chr07:578050-578083;-	372.653	-3.82622	0.368044	126.775	2.0806e-29	5.78211e-28	YGR043C	NQM1	IME4-dependent	Binding Down
chr07:582459-582538;+	223.21	2.52117	0.531022	27.4983	1.57236e-07	6.77798e-07	YGR046W	TAM41	IME4-independent	Binding Up
chr07:583300-583379;+	252.778	1.83005	0.381805	24.7716	6.45415e-07	2.53968e-06	YGR046W	TAM41	IME4-independent	No change
chr07:583390-583528;+	304.553	0.800848	0.284178	7.87522	0.00501169	0.00928326	YGR046W	TAM41	IME4-independent	No change
chr07:583543-583630;-	214.025	0.2143	0.286314	0.561655	0.453594	0.519409	YGR047C	TFC4	IME4-independent	No change
chr07:587040-587111;+	229.12	2.73342	0.309588	85.7466	2.04534e-20	3.37462e-19	YGR048W	UFD1	IME4-independent	Binding Up
chr07:591906-592037;+	605.041	-2.8371	0.232226	162.468	3.2689e-37	1.36481e-35	YGR052W	FMP48	IME4-dependent	Binding Down
chr07:606797-606855;+	1893.78	1.16308	0.488501	5.63778	0.0175774	0.0287255	snR48	snR48	IME4-independent	No change
chr07:608085-608146;+	612.357	1.92025	0.304983	39.8218	2.78218e-10	1.77871e-09	YGR060W	ERG25	IME4-independent	No change
chr07:608332-608549;+	1768.92	1.77355	0.374899	22.1046	2.58184e-06	9.17311e-06	YGR060W	ERG25	IME4-independent	No change
chr07:609048-609198;-	304.102	-0.287462	0.291802	0.969761	0.32474	0.389469	YGR061C	ADE6	IME4-independent	No change
chr07:619521-619594;-	938.268	-1.85844	0.194237	93.9824	3.18341e-22	5.91025e-21	YGR067C	YGR067C	IME4-independent	No change
chr07:619665-619706;-	404.66	-1.57776	0.24117	46.1548	1.09267e-11	8.4058e-11	YGR067C	YGR067C	IME4-independent	No change
chr07:619716-619750;-	350.038	-1.20841	0.264878	21.7068	3.17665e-06	1.1141e-05	YGR067C	YGR067C	IME4-independent	No change
chr07:620059-620099;-	382.435	-0.38726	0.241543	2.57335	0.108677	0.147575	YGR067C	YGR067C	IME4-independent	No change
chr07:620923-620966;-	436.544	-1.77647	0.247752	55.4817	9.43316e-14	8.93387e-13	YGR067C	YGR067C	IME4-independent	No change
chr07:625659-625722;+	200.799	-2.23144	0.343382	47.7834	4.76011e-12	3.83092e-11	YGR070W	ROM1	IME4-dependent	Binding Down
chr07:628629-628729;-	259.481	-3.9509	0.441638	133.973	5.53711e-31	1.69798e-29	YGR071C	YGR071C	IME4-dependent	Binding Down
chr07:633542-633690;+	200.079	-0.589015	0.285793	4.27251	0.0387338	0.0585616	YGR074W	SMD1	IME4-independent	No change
chr07:646498-646562;-	2046.8	-1.42397	0.241927	34.4582	4.35511e-09	2.38779e-08	YGR086C	PIL1	IME4-independent	No change
chr07:646572-646600;-	1298.92	-0.553358	0.242396	5.20718	0.0224938	0.0359392	YGR086C	PIL1	IME4-independent	No change
chr07:646610-646644;-	1790.45	-0.389939	0.339164	1.31953	0.250677	0.310311	YGR086C	PIL1	IME4-independent	No change
chr07:667480-667588;+	385.917	-2.35802	0.237967	102.403	4.53098e-24	9.45868e-23	YGR092W	DBF2	IME4-dependent	Binding Down
chr07:673042-673106;+	213.483	0.308792	0.337218	0.841924	0.358847	0.424779	YGR094W	VAS1	IME4-independent	No change
chr07:679375-679434;+	229.814	-3.31091	0.467092	75.6015	3.47093e-18	4.79301e-17	YGR097W	ASK10	IME4-dependent	Binding Down
chr07:679661-679820;+	274.241	0.44606	0.262148	2.89652	0.0887707	0.12308	YGR097W	ASK10	IME4-independent	No change
chr07:717898-717941;+	231.991	-0.957551	0.312493	9.59029	0.00195609	0.00396523	YGR116W	SPT6	IME4-independent	No change
chr07:717984-718050;+	300.361	-0.973617	0.252992	15.1506	9.92657e-05	0.000265415	YGR116W	SPT6	IME4-independent	No change
chr07:724496-724571;-	395.831	0.857191	0.226783	14.3805	0.00014934	0.000383285	YGR121C	MEP1	IME4-independent	No change
chr07:725032-725102;-	214.612	-0.317237	0.321473	0.98361	0.321309	0.385614	YGR121C	MEP1	IME4-independent	No change
chr07:735186-735272;+	361.266	-4.1174	0.367195	197.828	6.21983e-45	3.66311e-43	YGR124W	ASN2	IME4-dependent	Binding Down
chr07:741249-741310;+	380.769	-2.19034	0.282774	62.575	2.56489e-15	2.80215e-14	YGR127W	YGR127W	IME4-dependent	Binding Down
chr07:744751-744804;-	552.063	0.374101	0.223058	2.8227	0.09294	0.128341	YGR130C	YGR130C	IME4-independent	No change
chr07:745784-745842;-	297.373	-2.61538	0.960104	7.34002	0.00674359	0.0121497	YGR130C	YGR130C	IME4-independent	No change
chr07:746642-746682;-	252.288	1.55086	0.447931	13.9624	0.000186499	0.000467852	YGR130C	YGR130C	IME4-independent	No change
chr07:747399-747434;-	296.264	0.190873	0.308515	0.38436	0.535279	0.598245	YGR130C	YGR130C	IME4-independent	No change
chr07:748883-748918;-	251.941	1.94162	0.339828	34.8553	3.5514e-09	1.97515e-08	YGR132C	PHB1	IME4-independent	No change
chr07:748989-749027;-	218.776	1.511	0.379864	16.147	5.86113e-05	0.00016396	YGR132C	PHB1	IME4-independent	No change
chr07:755076-755117;+	326.862	3.2282	0.530489	43.332	4.61976e-11	3.29723e-10	YGR135W	PRE9	IME4-independent	Binding Up
chr07:755404-755486;+	348.519	1.96247	0.396492	24.0221	9.52354e-07	3.65213e-06	YGR135W	PRE9	IME4-independent	No change
chr07:755576-755622;+	337.304	2.41265	0.440028	30.774	2.89898e-08	1.39733e-07	YGR135W	PRE9	IME4-independent	Binding Up
chr07:755650-755705;+	347.988	2.4591	0.411518	36.759	1.33673e-09	7.83104e-09	YGR135W	PRE9	IME4-independent	Binding Up
chr07:757091-757151;-	220.281	-2.22926	0.360386	45.2664	1.71976e-11	1.29609e-10	YGR138C	TPO2	IME4-dependent	Binding Down
chr07:759190-759273;-	334.958	1.1255	0.257313	19.5158	9.97699e-06	3.21236e-05	YGR138C	TPO2	IME4-independent	No change
chr07:759291-759348;-	289.994	0.529838	0.276379	3.6777	0.0551448	0.0805392	YGR138C	TPO2	IME4-independent	No change
chr07:769063-769114;+	250.335	-1.06098	0.475509	5.3824	0.0203409	0.0328296	YGR143W	SKN1	IME4-independent	No change
chr07:770981-771026;+	274.768	0.542238	0.372219	2.13022	0.14442	0.190327	YGR143W	SKN1	IME4-independent	No change
chr07:771094-771123;+	260.33	0.484914	0.404324	1.443	0.229655	0.287489	YGR143W	SKN1	IME4-independent	No change
chr07:771130-771230;+	471.355	-0.190565	0.241852	0.621681	0.430423	0.496273	YGR143W	SKN1	IME4-independent	No change
chr07:771250-771314;+	335.265	0.62346	0.296424	4.44561	0.034991	0.0534573	YGR143W	SKN1	IME4-independent	No change
chr07:777994-778031;-	308.799	-4.69706	0.44311	165.806	6.09875e-38	2.65864e-36	YGR146C	ECL1	IME4-dependent	Binding Down
chr07:778154-778220;-	362.536	-1.80869	0.299396	36.9993	1.18172e-09	6.98277e-09	YGR146C	ECL1	IME4-independent	No change
chr07:778382-778485;-	430.149	-2.44191	0.299311	68.2131	1.46746e-16	1.80749e-15	YGR146C	ECL1	IME4-dependent	Binding Down
chr07:783975-784072;+	316.895	-3.12494	0.251473	195.75	1.76741e-44	1.02062e-42	YGR149W	YGR149W	IME4-dependent	Binding Down
chr07:795370-795502;-	361.954	-3.37214	0.235057	256.42	1.03481e-57	9.78998e-56	YGR152C	RSR1	IME4-dependent	Binding Down
chr07:802407-802441;+	227.951	0.521441	0.498021	1.12323	0.289224	0.351232	YGR157W	CHO2	IME4-independent	No change
chr07:803988-804021;+	279.688	1.10038	0.386265	8.70626	0.00317119	0.00613741	YGR157W	CHO2	IME4-independent	No change
chr07:804833-805021;+	388.971	0.254692	0.24688	1.07006	0.300932	0.363761	YGR157W	CHO2	IME4-independent	No change
chr07:834666-834816;-	234.928	2.03211	0.292593	50.9553	9.44944e-13	8.06467e-12	YGR174C	YGR174C	IME4-independent	Binding Up
chr07:835696-835836;-	974.67	-0.244406	0.293289	0.6952	0.404401	0.470233	YGR175C	ERG1	IME4-independent	No change
chr07:844061-844106;-	206.379	-0.724924	0.286754	6.33594	0.0118315	0.020207	YGR180C	RNR4	IME4-independent	No change
chr07:844174-844305;-	336.919	-0.137537	0.725039	0.0360267	0.84946	0.876363	YGR180C	RNR4	IME4-independent	No change
chr07:848700-848749;-	233.453	-0.122248	0.427268	0.082137	0.774422	0.814444	YGR184C	UBR1	IME4-independent	No change
chr07:849308-849375;-	240.962	0.888169	0.413069	4.72738	0.0296861	0.046057	YGR184C	UBR1	IME4-independent	No change
chr07:849424-849456;-	211.543	0.739209	0.536283	1.9228	0.165548	0.21486	YGR184C	UBR1	IME4-independent	No change
chr07:849599-849630;-	207.602	1.08385	0.572707	3.7215	0.0537162	0.0786723	YGR184C	UBR1	IME4-independent	No change
chr07:850045-850097;-	220.291	1.6976	0.539115	11.0304	0.000896315	0.00195366	YGR184C	UBR1	IME4-independent	No change
chr07:850138-850191;-	209.099	1.58243	0.596057	7.74955	0.00537261	0.00991257	YGR184C	UBR1	IME4-independent	No change
chr07:850346-850428;-	223.337	0.301761	0.468603	0.413607	0.520144	0.584637	YGR184C	UBR1	IME4-independent	No change
chr07:850686-850761;-	220.126	1.35395	0.516597	7.31114	0.00685284	0.0123238	YGR184C	UBR1	IME4-independent	No change
chr07:851195-851252;-	221.854	-0.895349	0.494007	3.46157	0.0628105	0.0906364	YGR184C	UBR1	IME4-independent	No change
chr07:851889-851957;-	217.284	-1.03023	0.523185	4.15132	0.041602	0.0624627	YGR184C	UBR1	IME4-independent	No change
chr07:852211-852264;-	203.493	1.95881	0.697308	9.2237	0.00238902	0.00476785	YGR184C	UBR1	IME4-independent	No change
chr07:852803-852838;-	224.508	-0.0169606	0.46748	0.00131338	0.971091	0.977244	YGR184C	UBR1	IME4-independent	No change
chr07:860785-860917;-	240.15	-0.605008	0.376677	2.5763	0.108475	0.147368	YGR188C	BUB1	IME4-independent	No change
chr07:866165-866219;-	282.855	-4.25128	0.479471	87.156	1.00292e-20	1.69886e-19	YGR189C	CRH1	IME4-dependent	Binding Down
chr07:872586-872648;-	2390.88	-1.85482	0.733413	6.29763	0.0120899	0.0206127	YGR192C	TDH3	IME4-independent	No change
chr07:872743-872919;-	4669.52	-1.21622	0.687	3.11224	0.0777062	0.109515	YGR192C	TDH3	IME4-independent	No change
chr07:898522-898623;+	401.614	-2.34375	0.310931	56.6582	5.18547e-14	5.02335e-13	YGR204W	ADE3	IME4-dependent	Binding Down
chr07:898636-898722;+	431.138	-3.55264	0.323937	121.457	3.03446e-28	8.00756e-27	YGR204W	ADE3	IME4-dependent	Binding Down
chr07:899858-899907;+	1050.88	-5.12277	0.379832	211.78	5.61661e-48	3.67269e-46	YGR205W	TDA10	IME4-dependent	Binding Down
chr07:902804-902900;-	543.251	0.761638	0.206508	13.808	0.000202473	0.000504509	YGR209C	TRX2	IME4-independent	No change
chr07:925093-925149;+	588.877	-3.40975	0.326745	156.015	8.40025e-36	3.26216e-34	YGR218W	CRM1	IME4-dependent	Binding Down
chr07:929018-929091;-	355.155	-0.386073	0.431565	0.799918	0.371118	0.436901	YGR221C	TOS2	IME4-independent	No change
chr07:929135-929173;-	351.053	-0.245733	0.264016	0.862234	0.353114	0.418755	YGR221C	TOS2	IME4-independent	No change
chr07:936046-936095;+	719.601	0.76842	0.784692	0.958284	0.32762	0.392305	YGR225W	AMA1	IME4-independent	No change
chr07:936500-936538;+	773.506	-2.56641	0.355454	72.189	1.95541e-17	2.56104e-16	YGR225W	AMA1	IME4-dependent	Binding Down
chr07:938730-938767;-	202.164	-1.6809	0.415769	17.4154	3.00378e-05	8.87463e-05	YGR229C	SMI1	IME4-independent	No change
chr07:938809-938896;-	346.369	-3.18848	0.353646	96.4662	9.07785e-23	1.74739e-21	YGR229C	SMI1	IME4-dependent	Binding Down
chr07:949393-949424;+	371.52	-5.483	0.647374	111.342	4.97835e-26	1.16507e-24	YGR234W	YHB1	IME4-dependent	Binding Down
chr07:950765-950929;-	280.804	1.53468	0.286519	28.8022	8.01613e-08	3.62417e-07	YGR235C	YGR235C	IME4-independent	No change
chr07:951867-951908;-	594.057	0.324672	0.336995	0.935345	0.333478	0.398355	YGR236C	SPG1	IME4-independent	No change
chr07:951928-952073;-	1308.63	0.761185	0.314126	5.88091	0.0153059	0.0254279	YGR236C	SPG1	IME4-independent	No change
chr07:952242-952271;-	521.427	0.531274	0.329471	2.65844	0.103001	0.14077	YGR236C	SPG1	IME4-independent	No change
chr07:955519-955582;-	229.089	-1.9364	0.275503	57.4746	3.42373e-14	3.36805e-13	YGR238C	KEL2	IME4-independent	No change
chr07:960061-960114;-	301.01	-1.49007	0.275841	30.3983	3.51835e-08	1.67521e-07	YGR240C	PFK1	IME4-independent	No change
chr07:960148-960223;-	322.833	-1.83105	0.269009	49.9612	1.5682e-12	1.31691e-11	YGR240C	PFK1	IME4-independent	No change
chr07:960241-960269;-	213.3	-0.875072	0.416813	4.39648	0.0360131	0.0548586	YGR240C	PFK1	IME4-independent	No change
chr07:960278-960336;-	243.142	-0.183438	0.346947	0.277728	0.598194	0.659118	YGR240C	PFK1	IME4-independent	No change
chr07:960875-960956;-	254.694	0.146386	0.337977	0.189112	0.663657	0.718167	YGR240C	PFK1	IME4-independent	No change
chr07:961407-961461;-	221.696	0.182922	0.405039	0.206316	0.64967	0.705694	YGR240C	PFK1	IME4-independent	No change
chr07:961969-962062;-	231.812	0.165161	0.38116	0.189602	0.663248	0.717812	YGR240C	PFK1	IME4-independent	No change
chr07:967069-967103;+	887.416	2.56679	0.249247	109.343	1.36533e-25	3.09742e-24	YGR243W	FMP43	IME4-independent	Binding Up
chr07:967210-967384;+	2096.18	2.10305	0.189858	121.416	3.09892e-28	8.15345e-27	YGR243W	FMP43	IME4-independent	Binding Up
chr07:967454-967513;-	922.065	1.46419	0.246475	35.6703	2.33703e-09	1.328e-08	YGR244C	LSC2	IME4-independent	No change
chr07:967567-967625;-	893.938	1.07701	0.25562	17.5422	2.81003e-05	8.33543e-05	YGR244C	LSC2	IME4-independent	No change
chr07:967704-967770;-	915.795	1.34098	0.243193	30.4724	3.38647e-08	1.61826e-07	YGR244C	LSC2	IME4-independent	No change
chr07:967775-967803;-	823.514	2.84825	0.415799	59.0194	1.56122e-14	1.57593e-13	YGR244C	LSC2	IME4-independent	Binding Up
chr07:967825-967905;-	1025.6	1.49183	0.206133	53.134	3.11552e-13	2.80997e-12	YGR244C	LSC2	IME4-independent	No change
chr07:968139-968167;-	812.6	1.05551	0.356645	8.62375	0.00331809	0.00639111	YGR244C	LSC2	IME4-independent	No change
chr07:968244-968283;-	867.044	1.59972	0.286157	31.9862	1.55271e-08	7.74872e-08	YGR244C	LSC2	IME4-independent	No change
chr07:968652-968710;-	914.329	1.46497	0.245669	36.0031	1.97002e-09	1.13394e-08	YGR244C	LSC2	IME4-independent	No change
chr07:968775-968925;-	1087.18	1.26018	0.193308	42.5581	6.8613e-11	4.77445e-10	YGR244C	LSC2	IME4-independent	No change
chr07:971831-972014;-	212.216	-0.489025	0.375989	1.73145	0.188226	0.240813	YGR246C	BRF1	IME4-independent	No change
chr07:980795-980825;-	214.528	1.33994	0.543354	6.32495	0.0119051	0.0203209	YGR250C	YGR250C	IME4-independent	No change
chr07:980828-980850;-	212.954	0.508724	0.535941	0.893394	0.344559	0.409538	YGR250C	YGR250C	IME4-independent	No change
chr07:980896-980969;-	242.587	1.31124	0.414007	10.3864	0.00126944	0.00268661	YGR250C	YGR250C	IME4-independent	No change
chr07:981595-981730;-	245.765	1.28833	0.406013	10.3975	0.00126187	0.00267378	YGR250C	YGR250C	IME4-independent	No change
chr07:982391-982528;-	268.923	2.21682	0.407096	34.2343	4.88604e-09	2.65272e-08	YGR250C	YGR250C	IME4-independent	Binding Up
chr07:987856-987897;-	226.099	1.98587	0.476311	17.4808	2.90225e-05	8.59178e-05	YGR253C	PUP2	IME4-independent	No change
chr07:988162-988218;-	244.283	1.12555	0.409437	7.25942	0.007053	0.0126405	YGR253C	PUP2	IME4-independent	No change
chr07:988294-988354;-	244.637	2.09087	0.412526	26.1479	3.16247e-07	1.30687e-06	YGR253C	PUP2	IME4-independent	Binding Up
chr07:990621-990664;+	731.943	-0.169325	1.27272	0.0177203	0.8941	0.914355	YGR254W	ENO1	IME4-independent	No change
chr07:990785-990822;+	703.174	0.13241	1.12624	0.0138456	0.906331	0.924376	YGR254W	ENO1	IME4-independent	No change
chr07:991593-991626;+	727.575	-0.176177	1.14319	0.0237806	0.877444	0.900429	YGR254W	ENO1	IME4-independent	No change
chr07:991841-991893;+	877.873	-0.0351651	1.0817	0.00105759	0.974057	0.979609	YGR254W	ENO1	IME4-independent	No change
chr07:1008995-1009049;-	256.652	0.778795	0.324614	5.47807	0.0192565	0.0312269	YGR264C	MES1	IME4-independent	No change
chr07:1009060-1009105;-	203.947	1.06276	0.416936	6.08548	0.0136297	0.0229432	YGR264C	MES1	IME4-independent	No change
chr07:1011402-1011491;-	206.336	-0.171567	0.484619	0.1278	0.720724	0.769343	YGR264C	MES1	IME4-independent	No change
chr07:1019374-1019413;+	344.683	-2.62502	0.435836	50.1602	1.41696e-12	1.19441e-11	YGR270W	YTA7	IME4-dependent	Binding Down
chr07:1020044-1020122;+	743.161	-3.2847	0.322489	128.547	8.5186e-30	2.45165e-28	YGR270W	YTA7	IME4-dependent	Binding Down
chr07:1020673-1020716;+	985.229	-4.1851	0.376408	151.571	7.8644e-35	2.902e-33	YGR270W	YTA7	IME4-dependent	Binding Down
chr07:1029343-1029446;-	211.357	-0.725082	0.263666	7.75059	0.0053695	0.0099089	YGR274C	TAF1	IME4-independent	No change
chr07:1038208-1038248;-	774.146	-1.85434	0.380842	23.6168	1.17554e-06	4.43532e-06	YGR279C	SCW4	IME4-independent	No change
chr07:1038441-1038473;-	625.258	-1.56729	0.350364	20.0764	7.44092e-06	2.44448e-05	YGR279C	SCW4	IME4-independent	No change
chr07:1039160-1039237;-	701.209	0.394604	0.350272	1.2699	0.259785	0.320398	YGR279C	SCW4	IME4-independent	No change
chr07:1039438-1039510;-	825.013	-0.0962487	0.348596	0.0763231	0.782343	0.820736	YGR279C	SCW4	IME4-independent	No change
chr07:1042086-1042159;+	267.592	2.48376	0.43405	34.4177	4.44668e-09	2.435e-08	YGR281W	YOR1	IME4-independent	Binding Up
chr07:1046617-1046738;+	362.871	-0.696152	0.362056	3.88841	0.0486206	0.0719678	YGR281W	YOR1	IME4-independent	No change
chr07:1046797-1046869;+	319.416	1.64277	0.323023	25.4111	4.63247e-07	1.86494e-06	YGR281W	YOR1	IME4-independent	No change
chr07:1046893-1046933;+	287.472	-0.386515	0.425084	0.857538	0.354429	0.420146	YGR281W	YOR1	IME4-independent	No change
chr07:1046941-1046977;+	271.45	-1.33718	0.566977	6.69848	0.00964953	0.0167441	YGR281W	YOR1	IME4-independent	No change
chr07:1047238-1047342;-	1391.34	-2.3603	0.355525	43.5171	4.20276e-11	3.02633e-10	YGR282C	BGL2	IME4-dependent	Binding Down
chr07:1047388-1047429;-	745.709	-1.06253	0.370911	8.22981	0.00412079	0.00775252	YGR282C	BGL2	IME4-independent	No change
chr07:1047541-1047572;-	697.982	0.929793	0.324857	8.33738	0.00388375	0.0073595	YGR282C	BGL2	IME4-independent	No change
chr07:1050006-1050068;-	212.143	1.88096	0.460832	17.364	3.08623e-05	9.10914e-05	YGR284C	ERV29	IME4-independent	No change
chr07:1050075-1050186;-	269.675	1.1206	0.331917	11.295	0.000777165	0.00171497	YGR284C	ERV29	IME4-independent	No change
chr07:1050193-1050262;-	213.682	1.54203	0.443165	12.2463	0.000466179	0.00107849	YGR284C	ERV29	IME4-independent	No change
chr07:1050434-1050469;-	208.81	2.6334	0.518861	29.8307	4.7147e-08	2.20905e-07	YGR284C	ERV29	IME4-independent	Binding Up
chr08:1438-1506;+	315.475	2.21159	0.386847	30.8092	2.8468e-08	1.37472e-07	YHL048W	COS8	IME4-independent	Binding Up
chr08:2224-2328;+	309.007	1.66464	0.406511	15.3301	9.0267e-05	0.000243995	YHL048W	COS8	IME4-independent	No change
chr08:27884-27978;-	529.017	1.67095	0.222628	59.4022	1.28523e-14	1.31072e-13	YHL034C	SBP1	IME4-independent	No change
chr08:27981-28025;-	385.065	0.794696	0.32605	5.87709	0.0153392	0.0254736	YHL034C	SBP1	IME4-independent	No change
chr08:28269-28300;-	399.69	1.18526	0.314636	14.3134	0.000154763	0.000395036	YHL034C	SBP1	IME4-independent	No change
chr08:28645-28745;-	436.607	1.21141	0.268692	20.5572	5.78764e-06	1.93786e-05	YHL034C	SBP1	IME4-independent	No change
chr08:28947-28996;-	361.736	1.44154	0.390823	14.0485	0.000178152	0.000448938	YHL034C	SBP1	IME4-independent	No change
chr08:31144-31193;-	242.777	-1.34675	0.379035	12.8653	0.000334723	0.00079997	YHL032C	GUT1	IME4-independent	No change
chr08:31197-31307;-	321.57	-1.9393	0.325296	37.1799	1.0772e-09	6.39491e-09	YHL032C	GUT1	IME4-independent	No change
chr08:31312-31342;-	201.341	-1.42018	0.719074	3.91936	0.0477329	0.0707953	YHL032C	GUT1	IME4-independent	No change
chr08:31511-31560;-	201.495	0.463813	0.48071	0.955531	0.328315	0.392962	YHL032C	GUT1	IME4-independent	No change
chr08:31585-31644;-	217.879	0.116793	0.435735	0.0719097	0.788576	0.825704	YHL032C	GUT1	IME4-independent	No change
chr08:31746-31779;-	203.051	0.378668	0.473683	0.651536	0.419564	0.485578	YHL032C	GUT1	IME4-independent	No change
chr08:31947-31980;-	200.842	0.13125	0.477763	0.075824	0.783038	0.821368	YHL032C	GUT1	IME4-independent	No change
chr08:32048-32123;-	249.548	0.408359	0.37938	1.17862	0.277638	0.339059	YHL032C	GUT1	IME4-independent	No change
chr08:32535-32587;-	211.191	1.0158	0.488958	4.64797	0.0310903	0.0479511	YHL032C	GUT1	IME4-independent	No change
chr08:33159-33225;-	208.361	-0.386018	0.432013	0.795914	0.372318	0.438082	YHL032C	GUT1	IME4-independent	No change
chr08:40348-40379;+	617.311	-1.94488	0.270593	56.9959	4.3672e-14	4.24453e-13	YHL030W	ECM29	IME4-independent	No change
chr08:40513-40606;+	2958.06	-3.38614	0.207869	268.221	2.77151e-60	2.89965e-58	YHL030W	ECM29	IME4-dependent	Binding Down
chr08:47937-48020;+	406.293	2.18358	0.253335	79.7931	4.15739e-19	6.14147e-18	YHL027W	RIM101	IME4-independent	Binding Up
chr08:51884-51995;+	5551.58	-0.0824234	0.353437	0.0543746	0.815619	0.848339	YHL024W	RIM4	IME4-independent	No change
chr08:52033-52077;+	4869.64	-2.23409	0.276926	64.3871	1.02225e-15	1.17605e-14	YHL024W	RIM4	IME4-dependent	Binding Down
chr08:52205-52273;+	6935.06	-1.51449	0.322285	21.8722	2.91426e-06	1.0268e-05	YHL024W	RIM4	IME4-independent	No change
chr08:53493-53557;+	3917.91	1.32202	0.237785	30.7236	2.97517e-08	1.43017e-07	YHL024W	RIM4	IME4-independent	No change
chr08:59274-59369;-	323.997	-1.97623	0.259368	61.8039	3.79417e-15	4.07015e-14	YHL021C	AIM17	IME4-independent	No change
chr08:59378-59435;-	216.485	-0.696396	0.302976	5.25938	0.0218288	0.0349836	YHL021C	AIM17	IME4-independent	No change
chr08:61046-61185;-	243.357	-1.59866	0.325071	25.3601	4.75649e-07	1.90796e-06	YHL020C	OPI1	IME4-independent	No change
chr08:84444-84493;-	230.044	-4.67632	0.423899	197.876	6.0734e-45	3.60071e-43	YHL007C	STE20	IME4-dependent	Binding Down
chr08:97481-97552;+	335.909	2.38283	0.783047	9.11816	0.00253085	0.00501839	YHR001W-A	QCR10	IME4-independent	No change
chr08:97591-97641;+	297.263	2.82171	0.32389	83.8349	5.37869e-20	8.51116e-19	YHR001W-A	QCR10	IME4-independent	Binding Up
chr08:97658-97776;+	395.832	2.13905	0.24128	79.4432	4.96296e-19	7.23534e-18	YHR001W-A	QCR10	IME4-independent	Binding Up
chr08:108417-108474;+	231.13	-2.50321	0.324026	77.649	1.23076e-18	1.75685e-17	YHR006W	STP2	IME4-dependent	Binding Down
chr08:109022-109086;-	318.518	1.51133	0.284668	28.6871	8.50688e-08	3.82853e-07	YHR007C	ERG11	IME4-independent	No change
chr08:109091-109122;-	239.455	1.69128	0.31688	29.9564	4.41875e-08	2.07805e-07	YHR007C	ERG11	IME4-independent	No change
chr08:109135-109175;-	244.048	0.909358	0.295779	9.42452	0.00214103	0.00430773	YHR007C	ERG11	IME4-independent	No change
chr08:109258-109310;-	257.562	0.0379708	0.287427	0.0174236	0.894986	0.915155	YHR007C	ERG11	IME4-independent	No change
chr08:113334-113384;-	625.34	-4.78881	0.495548	107.471	3.50961e-25	7.8223e-24	YHR009C	TDA3	IME4-dependent	Binding Down
chr08:118206-118277;+	287.966	0.700779	0.259602	7.37696	0.00660647	0.0119401	YHR011W	DIA4	IME4-independent	No change
chr08:121638-121678;+	355.418	2.46191	0.352394	45.7218	1.363e-11	1.03866e-10	YHR014W	SPO13	IME4-independent	Binding Up
chr08:125984-126066;-	211.738	1.93982	0.33819	34.3114	4.69631e-09	2.56105e-08	YHR016C	YSC84	IME4-independent	No change
chr08:129078-129174;-	217.581	-0.634698	0.258263	6.07284	0.0137276	0.0230862	YHR018C	ARG4	IME4-independent	No change
chr08:131279-131384;-	269.982	1.19181	0.250845	23.6373	1.16313e-06	4.39038e-06	YHR019C	DED81	IME4-independent	No change
chr08:150091-150165;+	207.802	1.85062	0.366862	27.6169	1.47882e-07	6.40268e-07	YHR026W	VMA16	IME4-independent	No change
chr08:150244-150401;+	243.768	1.57088	0.314768	26.0353	3.35224e-07	1.37507e-06	YHR026W	VMA16	IME4-independent	No change
chr08:150423-150555;-	607.595	1.01081	0.237254	18.1662	2.02444e-05	6.17399e-05	YHR027C	RPN1	IME4-independent	No change
chr08:150751-150801;-	477.503	1.75853	0.446279	16.7525	4.25853e-05	0.00012252	YHR027C	RPN1	IME4-independent	No change
chr08:150821-150902;-	513.821	1.15265	0.329932	12.3298	0.000445786	0.00103696	YHR027C	RPN1	IME4-independent	No change
chr08:151359-151412;-	473.966	1.15475	0.443522	6.84673	0.00888039	0.0155704	YHR027C	RPN1	IME4-independent	No change
chr08:151503-151597;-	540.053	0.435923	0.288587	2.25351	0.133312	0.176841	YHR027C	RPN1	IME4-independent	No change
chr08:151865-151955;-	533.558	0.618153	0.292514	4.41292	0.0356677	0.054379	YHR027C	RPN1	IME4-independent	No change
chr08:152422-152478;-	536.484	-0.84325	0.326638	7.23419	0.0071528	0.0127936	YHR027C	RPN1	IME4-independent	No change
chr08:152761-152799;-	478.927	0.817571	0.417049	3.80951	0.0509623	0.0750592	YHR027C	RPN1	IME4-independent	No change
chr08:153733-153836;-	308.202	-2.32169	0.262714	85.1498	2.76599e-20	4.46424e-19	YHR028C	DAP2	IME4-dependent	Binding Down
chr08:153898-153971;-	215.077	-1.2428	0.329863	14.0548	0.000177563	0.000447582	YHR028C	DAP2	IME4-independent	No change
chr08:157633-157723;-	264.595	-1.74578	0.271405	43.8631	3.5217e-11	2.5587e-10	YHR030C	SLT2	IME4-independent	No change
chr08:165442-165470;+	204.798	3.09688	1.29586	5.5394	0.018593	0.0302501	YHR033W	YHR033W	IME4-independent	No change
chr08:165649-165730;+	392.673	2.32171	0.229488	101.882	5.89371e-24	1.22746e-22	YHR033W	YHR033W	IME4-independent	Binding Up
chr08:179727-179756;+	227.682	0.164835	0.451378	0.132974	0.715368	0.764727	YHR042W	NCP1	IME4-independent	No change
chr08:180438-180478;+	230.812	0.528619	0.440017	1.44087	0.229999	0.287879	YHR042W	NCP1	IME4-independent	No change
chr08:180496-180538;+	230.517	1.20437	0.457333	7.18448	0.00735367	0.0131239	YHR042W	NCP1	IME4-independent	No change
chr08:180870-180934;+	278.792	1.37593	0.356213	15.5871	7.8789e-05	0.000215494	YHR042W	NCP1	IME4-independent	No change
chr08:181119-181158;+	235.986	1.04103	0.439552	5.72865	0.0166903	0.0274458	YHR042W	NCP1	IME4-independent	No change
chr08:181311-181351;+	236.825	0.365901	0.416485	0.769979	0.380223	0.445968	YHR042W	NCP1	IME4-independent	No change
chr08:181364-181458;+	413.06	1.63086	0.271561	37.6964	8.26579e-10	4.98019e-09	YHR042W	NCP1	IME4-independent	No change
chr08:181555-181608;+	257.294	0.747317	0.372289	4.05252	0.0441054	0.0658545	YHR042W	NCP1	IME4-independent	No change
chr08:196528-196605;+	318.419	-2.7911	0.307005	106.809	4.90149e-25	1.07893e-23	YHR050W	SMF2	IME4-dependent	Binding Down
chr08:196746-196803;+	385.479	-4.19676	0.383021	193.295	6.06905e-44	3.39447e-42	YHR050W	SMF2	IME4-dependent	Binding Down
chr08:200649-200708;-	461.107	-2.77996	0.249234	147.876	5.05015e-34	1.78928e-32	YHR056C	RSC30	IME4-dependent	Binding Down
chr08:222362-222387;+	296.907	1.42216	0.624081	5.18595	0.0227702	0.0363082	YHR071W	PCL5	IME4-independent	No change
chr08:222451-222474;+	465.096	0.360051	0.756017	0.227118	0.633669	0.69059	YHR071W	PCL5	IME4-independent	No change
chr08:244303-244383;-	694.986	-4.5564	0.32106	239.73	4.50292e-54	3.67381e-52	YHR079C	IRE1	IME4-dependent	Binding Down
chr08:248410-248451;-	599.664	-1.4524	0.323759	21.817	2.99925e-06	1.05424e-05	YHR079C-A	SAE3	IME4-independent	No change
chr08:255520-255553;-	839.082	-4.4595	0.423462	140.581	1.98676e-32	6.40154e-31	YHR082C	KSP1	IME4-dependent	Binding Down
chr08:262550-262624;+	1150.68	-5.75992	0.351666	286.774	2.50949e-64	3.28189e-62	YHR084W	STE12	IME4-dependent	Binding Down
chr08:262715-262753;+	244.595	-3.75922	0.312881	189.582	3.92314e-43	2.12735e-41	YHR084W	STE12	IME4-dependent	Binding Down
chr08:268966-269133;-	211.358	1.30159	1.27183	1.03806	0.308274	0.371676	YHR089C	GAR1	IME4-independent	No change
chr08:280745-280845;-	1749.1	-0.0338195	0.270243	0.0156564	0.900424	0.919995	YHR096C	HXT5	IME4-independent	No change
chr08:280868-280920;-	1255.36	0.369302	0.297329	1.5457	0.213772	0.269808	YHR096C	HXT5	IME4-independent	No change
chr08:281249-281340;-	1172.3	0.718749	0.296556	5.90635	0.0150864	0.0251007	YHR096C	HXT5	IME4-independent	No change
chr08:283937-284047;-	212.858	-1.66159	0.294184	34.3422	4.62252e-09	2.52507e-08	YHR097C	YHR097C	IME4-independent	No change
chr08:285389-285421;-	279.309	-3.16329	0.315331	127.959	1.14594e-29	3.25587e-28	YHR098C	SFB3	IME4-dependent	Binding Down
chr08:285440-285481;-	764.616	-5.31106	0.330219	379.685	1.45727e-84	3.50257e-82	YHR098C	SFB3	IME4-dependent	Binding Down
chr08:299104-299160;+	541.842	0.969505	0.853973	1.27602	0.258641	0.319324	YHR099W	TRA1	IME4-independent	No change
chr08:300125-300192;+	673.504	1.18994	0.377727	9.8183	0.00172784	0.00354293	YHR099W	TRA1	IME4-independent	No change
chr08:300216-300299;+	696.707	2.25446	0.515068	18.8507	1.41358e-05	4.44204e-05	YHR099W	TRA1	IME4-independent	Binding Up
chr08:305712-305829;+	318.418	-2.15782	0.274141	72.577	1.60639e-17	2.129e-16	YHR102W	KIC1	IME4-dependent	Binding Down
chr08:310686-310761;+	272.362	0.235985	0.238213	0.986834	0.320518	0.38482	YHR104W	GRE3	IME4-independent	No change
chr08:312631-312679;+	260.794	-3.39405	0.320147	157.84	3.35413e-36	1.31983e-34	YHR106W	TRR2	IME4-dependent	Binding Down
chr08:318610-318636;+	229.243	-0.695626	0.328129	4.70514	0.0300725	0.0465751	YHR110W	ERP5	IME4-independent	No change
chr08:318642-318675;+	263.214	-1.58117	0.334816	25.9899	3.43215e-07	1.40655e-06	YHR110W	ERP5	IME4-independent	No change
chr08:320606-320682;+	221.585	-3.39001	0.348799	124.16	7.77225e-29	2.11372e-27	YHR111W	UBA4	IME4-dependent	Binding Down
chr08:326769-326907;-	243.649	-0.00805167	0.256801	0.000983719	0.974979	0.98027	YHR115C	DMA1	IME4-independent	No change
chr08:327060-327159;-	265.145	2.06616	0.363236	33.1247	8.64331e-09	4.49766e-08	YHR115C	DMA1	IME4-independent	Binding Up
chr08:348215-348376;+	260.698	-0.307646	0.251687	1.50524	0.219867	0.276649	YHR127W	YHR127W	IME4-independent	No change
chr08:355294-355378;-	207.851	-0.108981	0.348112	0.0983794	0.753783	0.797548	YHR132C	ECM14	IME4-independent	No change
chr08:357045-357082;+	440.508	1.23602	0.267352	21.4169	3.69503e-06	1.28009e-05	YHR132W-A	IGO2	IME4-independent	No change
chr08:359247-359285;-	990.071	-5.66915	0.325111	338.917	1.09848e-75	1.95375e-73	YHR135C	YCK1	IME4-dependent	Binding Down
chr08:361145-361225;-	347.385	-3.37545	0.280358	179.952	4.96398e-41	2.42553e-39	YHR136C	SPL2	IME4-dependent	Binding Down
chr08:363557-363610;+	367.227	3.1228	0.328628	83.1253	7.70118e-20	1.20788e-18	YHR137W	ARO9	IME4-independent	Binding Up
chr08:363780-363830;+	476.602	0.773564	0.287023	6.68012	0.00974941	0.0169009	YHR137W	ARO9	IME4-independent	No change
chr08:364024-364080;-	215.9	0.149292	0.365077	0.167971	0.681921	0.734625	YHR138C	YHR138C	IME4-independent	No change
chr08:368081-368113;+	857.946	0.349755	0.462255	0.572935	0.449095	0.514864	snR32	snR32	IME4-independent	No change
chr08:371054-371111;+	341.502	-5.35398	0.344419	426.334	1.02033e-94	3.62952e-92	YHR142W	CHS7	IME4-dependent	Binding Down
chr08:374084-374155;+	231.924	1.78306	0.30292	35.8298	2.15332e-09	1.23386e-08	YHR143W-A	RPC10	IME4-independent	No change
chr08:377792-377819;+	412.353	-0.469097	0.35731	1.79219	0.18066	0.232168	YHR146W	CRP1	IME4-independent	No change
chr08:377889-377922;+	382.564	-3.48609	0.864751	32.4764	1.20652e-08	6.1172e-08	YHR146W	CRP1	IME4-dependent	Binding Down
chr08:378315-378358;+	431.07	1.95132	0.30832	41.2141	1.36432e-10	9.17766e-10	YHR146W	CRP1	IME4-independent	No change
chr08:378391-378421;+	446.439	0.916902	0.285593	10.063	0.00151279	0.00314549	YHR146W	CRP1	IME4-independent	No change
chr08:381039-381147;-	411.412	-5.43498	0.306498	505.154	7.18762e-112	4.2613e-109	YHR149C	SKG6	IME4-dependent	Binding Down
chr08:388045-388127;-	422.185	1.14574	0.785118	2.10231	0.147076	0.193312	YHR153C	SPO16	IME4-independent	No change
chr08:388305-388346;-	417.691	0.381249	0.382187	0.966182	0.325634	0.390331	YHR153C	SPO16	IME4-independent	No change
chr08:388541-388579;-	376.255	0.855839	0.519682	2.56155	0.109491	0.148566	YHR153C	SPO16	IME4-independent	No change
chr08:388968-389066;-	425.613	1.61996	0.351691	20.4963	5.97457e-06	1.99369e-05	YHR153C	SPO16	IME4-independent	No change
chr08:392767-392817;+	958.101	-5.65553	0.375037	274.869	9.85677e-62	1.13839e-59	YHR154W	RTT107	IME4-dependent	Binding Down
chr08:397814-397853;+	3322.71	0.737063	0.444862	2.73898	0.0979273	0.134559	snR71	snR71	IME4-independent	No change
[truncated: 2,098 more rows]

## Sheet: Gis2 iCLIP
peak_id	baseMean	log2FoldChange	lfcSE	stat	pvalue	padj	gene_id	gene_name	category	sup_category
[truncated: 3,563 more rows]
